# Supplementary material for: Genome-Wide Association of Lipid-Lowering Response to Statins in Combined Study Populations
Source: PLoS One. 2010 Mar 22;5(3):e9763. doi: 10.1371/journal.pone.0009763 (PMC2842298; doi:10.1371/journal.pone.0009763)
Supplement: Table S2 — Single nucleotide polymorphisms (SNPs) associated with difference or sum traits for total cholesterol with a posterior probability greater than 1%. SNPs are listed by reference SNP accession ID (rs#) and are ordered by chromosome number and location on each chromosome. Posterior probabilities calculated by Bayesian analysis are listed for H0, HS, HD, HS+D followed by p-values and effect sizes as calculated by frequentist statistics for the sum and difference traits. Major and minor alleles are listed. Abbreviations: MAF, minor allele frequency; chr, chromosome; GENE1-3, genes closest to variant; dist1-3, distance of gene1-3 to variant; log10BF, log(base 10) transformed bayes factor for: S, sum trait in total population; S-TNT, sum trait in TNT population; S-PRINCE, sum trait in PRINCE population; S-CAP, sum trait in CAP population; D, difference trait in total population; D-TNT, difference trait in TNT population; D-PRINCE, difference trait in PRINCE population; D-CAP, difference trait in CAP population; P-values from individual populations are also listed for each SNP. A complete results list for all ∼2.5 million sites is available online at http://stephenslab.uchicago.edu/publications.html. (0.68 MB XLS) [file pone.0009763.s005.xls]

## Sheet: Sheet1
rs-link	rsnum	SNP	chr	HO	HS	HD	HS+D	P-value-S	P-value-D	Effect-S	Effect-D	Minor Allele	Major Allele	MAF	GENE1-link	GENE1	GENE1	dist1 (Kb)	GENE2-link	GENE2	GENE2	dist2 (Kb)	GENE3-link	GENE3	GENE3	dist3 (Kb)	log10BF-S	log10BF-S-TNT	log10BF-S-PRINCE	log10BF-S-CAP	P-value-S-TNT	P-value-S-PRINCE	P-value-S-CAP	log10BF-D	log10BF-D-TNT	log10BF-D-PRINCE	log10BF-D-CAP	P-value-D-TNT	P-value-D-PRINCE	P-value-D-CAP
http://www.ensembl.org/Homo_sapiens/Variation/Summary?v=rs2500286	rs2500286	rs2500286	1	0.99	0.01	0	0	0.00017	0.38	0.1	-0.02	G	A	0.24	http://www.ncbi.nlm.nih.gov/sites/entrez?Db=gene&Cmd=ShowDetailView&TermToSearch=63976&ordinalpos=1&itool=EntrezSystem2.PEntrez.Gene.Gene_ResultsPanel.Gene_RVDocSum	PRDM16	PRDM16	0	http://www.ncbi.nlm.nih.gov/sites/entrez?Db=gene&Cmd=ShowDetailView&TermToSearch=27237&ordinalpos=1&itool=EntrezSystem2.PEntrez.Gene.Gene_ResultsPanel.Gene_RVDocSum	ARHGEF16	ARHGEF16	104	http://www.ncbi.nlm.nih.gov/sites/entrez?Db=gene&Cmd=ShowDetailView&TermToSearch=1953&ordinalpos=1&itool=EntrezSystem2.PEntrez.Gene.Gene_ResultsPanel.Gene_RVDocSum	MEGF6	MEGF6	130	2.1	1.3	0	0	0.0014	0.11	0.12	-0.4	-0.4	-0.4	-0.2	0.69	0.55	0.53
http://www.ensembl.org/Homo_sapiens/Variation/Summary?v=rs17399569	rs17399569	rs17399569	1	0.96	0.04	0	0	4e-05	0.67	0.2	-0.02	T	C	0.06	http://www.ncbi.nlm.nih.gov/sites/entrez?Db=gene&Cmd=ShowDetailView&TermToSearch=63976&ordinalpos=1&itool=EntrezSystem2.PEntrez.Gene.Gene_ResultsPanel.Gene_RVDocSum	PRDM16	PRDM16	0	http://www.ncbi.nlm.nih.gov/sites/entrez?Db=gene&Cmd=ShowDetailView&TermToSearch=27237&ordinalpos=1&itool=EntrezSystem2.PEntrez.Gene.Gene_ResultsPanel.Gene_RVDocSum	ARHGEF16	ARHGEF16	101	http://www.ncbi.nlm.nih.gov/sites/entrez?Db=gene&Cmd=ShowDetailView&TermToSearch=1953&ordinalpos=1&itool=EntrezSystem2.PEntrez.Gene.Gene_ResultsPanel.Gene_RVDocSum	MEGF6	MEGF6	128	2.6	0.2	1.8	0.1	0.058	0.00029	0.088	-0.4	-0.3	-0.2	-0.1	0.91	0.9	0.3
http://www.ensembl.org/Homo_sapiens/Variation/Summary?v=rs11807862	rs11807862	rs11807862	1	0.69	0.3	0	0.01	2.2e-06	0.57	0.24	-0.03	A	T	0.06	http://www.ncbi.nlm.nih.gov/sites/entrez?Db=gene&Cmd=ShowDetailView&TermToSearch=63976&ordinalpos=1&itool=EntrezSystem2.PEntrez.Gene.Gene_ResultsPanel.Gene_RVDocSum	PRDM16	PRDM16	0	http://www.ncbi.nlm.nih.gov/sites/entrez?Db=gene&Cmd=ShowDetailView&TermToSearch=27237&ordinalpos=1&itool=EntrezSystem2.PEntrez.Gene.Gene_ResultsPanel.Gene_RVDocSum	ARHGEF16	ARHGEF16	101	http://www.ncbi.nlm.nih.gov/sites/entrez?Db=gene&Cmd=ShowDetailView&TermToSearch=1953&ordinalpos=1&itool=EntrezSystem2.PEntrez.Gene.Gene_ResultsPanel.Gene_RVDocSum	MEGF6	MEGF6	127	3.7	0.9	1.6	0.1	0.0054	0.00044	0.083	-0.3	-0.3	-0.2	-0.1	0.71	0.88	0.33
http://www.ensembl.org/Homo_sapiens/Variation/Summary?v=rs6658356	rs6658356	rs6658356	1	0.68	0.3	0	0.01	2.1e-06	0.58	0.24	-0.03	A	G	0.06	http://www.ncbi.nlm.nih.gov/sites/entrez?Db=gene&Cmd=ShowDetailView&TermToSearch=63976&ordinalpos=1&itool=EntrezSystem2.PEntrez.Gene.Gene_ResultsPanel.Gene_RVDocSum	PRDM16	PRDM16	0	http://www.ncbi.nlm.nih.gov/sites/entrez?Db=gene&Cmd=ShowDetailView&TermToSearch=27237&ordinalpos=1&itool=EntrezSystem2.PEntrez.Gene.Gene_ResultsPanel.Gene_RVDocSum	ARHGEF16	ARHGEF16	100	http://www.ncbi.nlm.nih.gov/sites/entrez?Db=gene&Cmd=ShowDetailView&TermToSearch=1953&ordinalpos=1&itool=EntrezSystem2.PEntrez.Gene.Gene_ResultsPanel.Gene_RVDocSum	MEGF6	MEGF6	126	3.7	0.9	1.6	0.1	0.0053	0.00042	0.084	-0.3	-0.3	-0.2	-0.1	0.71	0.86	0.34
http://www.ensembl.org/Homo_sapiens/Variation/Summary?v=rs11805709	rs11805709	rs11805709	1	0.98	0.01	0	0	0.00015	0.56	0.12	-0.02	T	C	0.23	http://www.ncbi.nlm.nih.gov/sites/entrez?Db=gene&Cmd=ShowDetailView&TermToSearch=55966&ordinalpos=1&itool=EntrezSystem2.PEntrez.Gene.Gene_ResultsPanel.Gene_RVDocSum	AJAP1	AJAP1	4	http://www.ncbi.nlm.nih.gov/sites/entrez?Db=gene&Cmd=ShowDetailView&TermToSearch=644357&ordinalpos=1&itool=EntrezSystem2.PEntrez.Gene.Gene_ResultsPanel.Gene_RVDocSum	LOC644357	LOC644357	579	http://www.ncbi.nlm.nih.gov/sites/entrez?Db=gene&Cmd=ShowDetailView&TermToSearch=728716&ordinalpos=1&itool=EntrezSystem2.PEntrez.Gene.Gene_ResultsPanel.Gene_RVDocSum	LOC728716	LOC728716	835	2.2	0.2	0.7	0.4	0.056	0.013	0.023	-0.6	-0.4	-0.4	0	0.95	0.85	0.13
http://www.ensembl.org/Homo_sapiens/Variation/Summary?v=rs6657800	rs6657800	rs6657800	1	0.99	0.01	0	0	0.00018	0.54	0.12	-0.02	T	C	0.24	http://www.ncbi.nlm.nih.gov/sites/entrez?Db=gene&Cmd=ShowDetailView&TermToSearch=55966&ordinalpos=1&itool=EntrezSystem2.PEntrez.Gene.Gene_ResultsPanel.Gene_RVDocSum	AJAP1	AJAP1	8	http://www.ncbi.nlm.nih.gov/sites/entrez?Db=gene&Cmd=ShowDetailView&TermToSearch=644357&ordinalpos=1&itool=EntrezSystem2.PEntrez.Gene.Gene_ResultsPanel.Gene_RVDocSum	LOC644357	LOC644357	583	http://www.ncbi.nlm.nih.gov/sites/entrez?Db=gene&Cmd=ShowDetailView&TermToSearch=728716&ordinalpos=1&itool=EntrezSystem2.PEntrez.Gene.Gene_ResultsPanel.Gene_RVDocSum	LOC728716	LOC728716	839	2.1	0.2	0.5	0.5	0.057	0.019	0.02	-0.5	-0.4	-0.4	0	0.94	0.88	0.15
http://www.ensembl.org/Homo_sapiens/Variation/Summary?v=rs2992735	rs2992735	rs2992735	1	0.98	0.02	0	0	0.00014	0.99	0.09	0	T	A	0.36	http://www.ncbi.nlm.nih.gov/sites/entrez?Db=gene&Cmd=ShowDetailView&TermToSearch=127707&ordinalpos=1&itool=EntrezSystem2.PEntrez.Gene.Gene_ResultsPanel.Gene_RVDocSum	KLHDC7A	KLHDC7A	7	http://www.ncbi.nlm.nih.gov/sites/entrez?Db=gene&Cmd=ShowDetailView&TermToSearch=391012&ordinalpos=1&itool=EntrezSystem2.PEntrez.Gene.Gene_ResultsPanel.Gene_RVDocSum	LOC391012	LOC391012	39	http://www.ncbi.nlm.nih.gov/sites/entrez?Db=gene&Cmd=ShowDetailView&TermToSearch=84966&ordinalpos=1&itool=EntrezSystem2.PEntrez.Gene.Gene_ResultsPanel.Gene_RVDocSum	IGSF21	IGSF21	95	2.3	1.6	-0.3	0.3	0.00066	0.34	0.033	-0.7	-0.3	0.2	-0.1	0.29	0.038	0.24
http://www.ensembl.org/Homo_sapiens/Variation/Summary?v=rs3007733	rs3007733	rs3007733	1	0.98	0.02	0	0	0.00012	0.91	0.09	0	C	T	0.36	http://www.ncbi.nlm.nih.gov/sites/entrez?Db=gene&Cmd=ShowDetailView&TermToSearch=127707&ordinalpos=1&itool=EntrezSystem2.PEntrez.Gene.Gene_ResultsPanel.Gene_RVDocSum	KLHDC7A	KLHDC7A	7	http://www.ncbi.nlm.nih.gov/sites/entrez?Db=gene&Cmd=ShowDetailView&TermToSearch=391012&ordinalpos=1&itool=EntrezSystem2.PEntrez.Gene.Gene_ResultsPanel.Gene_RVDocSum	LOC391012	LOC391012	39	http://www.ncbi.nlm.nih.gov/sites/entrez?Db=gene&Cmd=ShowDetailView&TermToSearch=84966&ordinalpos=1&itool=EntrezSystem2.PEntrez.Gene.Gene_ResultsPanel.Gene_RVDocSum	IGSF21	IGSF21	96	2.3	1.6	-0.3	0.3	0.00069	0.31	0.032	-0.7	-0.3	0.3	-0.2	0.29	0.028	0.26
http://www.ensembl.org/Homo_sapiens/Variation/Summary?v=rs1360916	rs1360916	rs1360916	1	0.98	0.02	0	0	0.00014	0.99	0.09	0	G	A	0.36	http://www.ncbi.nlm.nih.gov/sites/entrez?Db=gene&Cmd=ShowDetailView&TermToSearch=127707&ordinalpos=1&itool=EntrezSystem2.PEntrez.Gene.Gene_ResultsPanel.Gene_RVDocSum	KLHDC7A	KLHDC7A	6	http://www.ncbi.nlm.nih.gov/sites/entrez?Db=gene&Cmd=ShowDetailView&TermToSearch=391012&ordinalpos=1&itool=EntrezSystem2.PEntrez.Gene.Gene_ResultsPanel.Gene_RVDocSum	LOC391012	LOC391012	38	http://www.ncbi.nlm.nih.gov/sites/entrez?Db=gene&Cmd=ShowDetailView&TermToSearch=84966&ordinalpos=1&itool=EntrezSystem2.PEntrez.Gene.Gene_ResultsPanel.Gene_RVDocSum	IGSF21	IGSF21	97	2.3	1.6	-0.3	0.3	0.00072	0.31	0.036	-0.7	-0.3	0.3	-0.1	0.3	0.036	0.21
http://www.ensembl.org/Homo_sapiens/Variation/Summary?v=rs1360915	rs1360915	rs1360915	1	0.98	0.02	0	0	0.00014	1	0.09	0	T	C	0.36	http://www.ncbi.nlm.nih.gov/sites/entrez?Db=gene&Cmd=ShowDetailView&TermToSearch=127707&ordinalpos=1&itool=EntrezSystem2.PEntrez.Gene.Gene_ResultsPanel.Gene_RVDocSum	KLHDC7A	KLHDC7A	6	http://www.ncbi.nlm.nih.gov/sites/entrez?Db=gene&Cmd=ShowDetailView&TermToSearch=391012&ordinalpos=1&itool=EntrezSystem2.PEntrez.Gene.Gene_ResultsPanel.Gene_RVDocSum	LOC391012	LOC391012	38	http://www.ncbi.nlm.nih.gov/sites/entrez?Db=gene&Cmd=ShowDetailView&TermToSearch=84966&ordinalpos=1&itool=EntrezSystem2.PEntrez.Gene.Gene_ResultsPanel.Gene_RVDocSum	IGSF21	IGSF21	97	2.3	1.6	-0.3	0.3	0.00075	0.31	0.035	-0.7	-0.3	0.2	-0.1	0.3	0.037	0.21
http://www.ensembl.org/Homo_sapiens/Variation/Summary?v=rs1316327	rs1316327	rs1316327	1	0.98	0.02	0	0	0.00015	1	0.09	0	G	A	0.36	http://www.ncbi.nlm.nih.gov/sites/entrez?Db=gene&Cmd=ShowDetailView&TermToSearch=127707&ordinalpos=1&itool=EntrezSystem2.PEntrez.Gene.Gene_ResultsPanel.Gene_RVDocSum	KLHDC7A	KLHDC7A	5	http://www.ncbi.nlm.nih.gov/sites/entrez?Db=gene&Cmd=ShowDetailView&TermToSearch=391012&ordinalpos=1&itool=EntrezSystem2.PEntrez.Gene.Gene_ResultsPanel.Gene_RVDocSum	LOC391012	LOC391012	37	http://www.ncbi.nlm.nih.gov/sites/entrez?Db=gene&Cmd=ShowDetailView&TermToSearch=84966&ordinalpos=1&itool=EntrezSystem2.PEntrez.Gene.Gene_ResultsPanel.Gene_RVDocSum	IGSF21	IGSF21	97	2.3	1.6	-0.3	0.3	0.00078	0.31	0.036	-0.7	-0.3	0.2	-0.1	0.31	0.038	0.21
http://www.ensembl.org/Homo_sapiens/Variation/Summary?v=rs3007734	rs3007734	rs3007734	1	0.98	0.02	0	0	0.00015	1	0.09	0	T	C	0.36	http://www.ncbi.nlm.nih.gov/sites/entrez?Db=gene&Cmd=ShowDetailView&TermToSearch=127707&ordinalpos=1&itool=EntrezSystem2.PEntrez.Gene.Gene_ResultsPanel.Gene_RVDocSum	KLHDC7A	KLHDC7A	5	http://www.ncbi.nlm.nih.gov/sites/entrez?Db=gene&Cmd=ShowDetailView&TermToSearch=391012&ordinalpos=1&itool=EntrezSystem2.PEntrez.Gene.Gene_ResultsPanel.Gene_RVDocSum	LOC391012	LOC391012	36	http://www.ncbi.nlm.nih.gov/sites/entrez?Db=gene&Cmd=ShowDetailView&TermToSearch=84966&ordinalpos=1&itool=EntrezSystem2.PEntrez.Gene.Gene_ResultsPanel.Gene_RVDocSum	IGSF21	IGSF21	98	2.2	1.6	-0.3	0.3	0.00081	0.31	0.036	-0.7	-0.3	0.3	-0.1	0.31	0.037	0.2
http://www.ensembl.org/Homo_sapiens/Variation/Summary?v=rs2992764	rs2992764	rs2992764	1	0.99	0.01	0	0	0.00022	0.97	0.1	0	G	A	0.33	http://www.ncbi.nlm.nih.gov/sites/entrez?Db=gene&Cmd=ShowDetailView&TermToSearch=127707&ordinalpos=1&itool=EntrezSystem2.PEntrez.Gene.Gene_ResultsPanel.Gene_RVDocSum	KLHDC7A	KLHDC7A	4	http://www.ncbi.nlm.nih.gov/sites/entrez?Db=gene&Cmd=ShowDetailView&TermToSearch=391012&ordinalpos=1&itool=EntrezSystem2.PEntrez.Gene.Gene_ResultsPanel.Gene_RVDocSum	LOC391012	LOC391012	35	http://www.ncbi.nlm.nih.gov/sites/entrez?Db=gene&Cmd=ShowDetailView&TermToSearch=84966&ordinalpos=1&itool=EntrezSystem2.PEntrez.Gene.Gene_ResultsPanel.Gene_RVDocSum	IGSF21	IGSF21	99	2.2	1.3	-0.2	0.4	0.002	0.27	0.028	-0.6	-0.3	0.3	0	0.33	0.032	0.17
http://www.ensembl.org/Homo_sapiens/Variation/Summary?v=rs2992763	rs2992763	rs2992763	1	0.99	0.01	0	0	0.00022	0.95	0.09	0	G	A	0.35	http://www.ncbi.nlm.nih.gov/sites/entrez?Db=gene&Cmd=ShowDetailView&TermToSearch=127707&ordinalpos=1&itool=EntrezSystem2.PEntrez.Gene.Gene_ResultsPanel.Gene_RVDocSum	KLHDC7A	KLHDC7A	3	http://www.ncbi.nlm.nih.gov/sites/entrez?Db=gene&Cmd=ShowDetailView&TermToSearch=391012&ordinalpos=1&itool=EntrezSystem2.PEntrez.Gene.Gene_ResultsPanel.Gene_RVDocSum	LOC391012	LOC391012	35	http://www.ncbi.nlm.nih.gov/sites/entrez?Db=gene&Cmd=ShowDetailView&TermToSearch=84966&ordinalpos=1&itool=EntrezSystem2.PEntrez.Gene.Gene_ResultsPanel.Gene_RVDocSum	IGSF21	IGSF21	99	2.1	1.4	-0.3	0.3	0.0014	0.31	0.033	-0.7	-0.4	0.2	-0.1	0.38	0.039	0.18
http://www.ensembl.org/Homo_sapiens/Variation/Summary?v=rs2992757	rs2992757	rs2992757	1	0.99	0.01	0	0	0.00021	0.96	0.09	0	T	C	0.36	http://www.ncbi.nlm.nih.gov/sites/entrez?Db=gene&Cmd=ShowDetailView&TermToSearch=127707&ordinalpos=1&itool=EntrezSystem2.PEntrez.Gene.Gene_ResultsPanel.Gene_RVDocSum	KLHDC7A	KLHDC7A	1	http://www.ncbi.nlm.nih.gov/sites/entrez?Db=gene&Cmd=ShowDetailView&TermToSearch=391012&ordinalpos=1&itool=EntrezSystem2.PEntrez.Gene.Gene_ResultsPanel.Gene_RVDocSum	LOC391012	LOC391012	32	http://www.ncbi.nlm.nih.gov/sites/entrez?Db=gene&Cmd=ShowDetailView&TermToSearch=84966&ordinalpos=1&itool=EntrezSystem2.PEntrez.Gene.Gene_ResultsPanel.Gene_RVDocSum	IGSF21	IGSF21	102	2.1	1.4	-0.3	0.4	0.0013	0.33	0.03	-0.6	-0.4	0.2	-0.1	0.39	0.041	0.18
http://www.ensembl.org/Homo_sapiens/Variation/Summary?v=rs2992745	rs2992745	rs2992745	1	0.98	0.02	0	0	8.6e-05	0.82	0.1	0.01	A	T	0.4	http://www.ncbi.nlm.nih.gov/sites/entrez?Db=gene&Cmd=ShowDetailView&TermToSearch=127707&ordinalpos=1&itool=EntrezSystem2.PEntrez.Gene.Gene_ResultsPanel.Gene_RVDocSum	KLHDC7A	KLHDC7A	0	http://www.ncbi.nlm.nih.gov/sites/entrez?Db=gene&Cmd=ShowDetailView&TermToSearch=391012&ordinalpos=1&itool=EntrezSystem2.PEntrez.Gene.Gene_ResultsPanel.Gene_RVDocSum	LOC391012	LOC391012	30	http://www.ncbi.nlm.nih.gov/sites/entrez?Db=gene&Cmd=ShowDetailView&TermToSearch=84966&ordinalpos=1&itool=EntrezSystem2.PEntrez.Gene.Gene_ResultsPanel.Gene_RVDocSum	IGSF21	IGSF21	105	2.4	1.5	-0.3	0.4	0.00081	0.26	0.024	-0.4	-0.3	0.3	-0.1	0.47	0.029	0.19
http://www.ensembl.org/Homo_sapiens/Variation/Summary?v=rs3007719	rs3007719	rs3007719	1	0.97	0.03	0	0	8.7e-05	0.65	0.11	-0.01	T	C	0.3	http://www.ncbi.nlm.nih.gov/sites/entrez?Db=gene&Cmd=ShowDetailView&TermToSearch=127707&ordinalpos=1&itool=EntrezSystem2.PEntrez.Gene.Gene_ResultsPanel.Gene_RVDocSum	KLHDC7A	KLHDC7A	1	http://www.ncbi.nlm.nih.gov/sites/entrez?Db=gene&Cmd=ShowDetailView&TermToSearch=391012&ordinalpos=1&itool=EntrezSystem2.PEntrez.Gene.Gene_ResultsPanel.Gene_RVDocSum	LOC391012	LOC391012	28	http://www.ncbi.nlm.nih.gov/sites/entrez?Db=gene&Cmd=ShowDetailView&TermToSearch=84966&ordinalpos=1&itool=EntrezSystem2.PEntrez.Gene.Gene_ResultsPanel.Gene_RVDocSum	IGSF21	IGSF21	107	2.5	1.3	0	0.3	0.0016	0.15	0.035	-0.6	-0.2	0.1	0	0.22	0.064	0.11
http://www.ensembl.org/Homo_sapiens/Variation/Summary?v=rs4949182	rs4949182	rs4949182	1	0.99	0.01	0	0	0.00043	0.74	0.17	-0.02	A	G	0.08	http://www.ncbi.nlm.nih.gov/sites/entrez?Db=gene&Cmd=ShowDetailView&TermToSearch=9672&ordinalpos=1&itool=EntrezSystem2.PEntrez.Gene.Gene_ResultsPanel.Gene_RVDocSum	SDC3	SDC3	24	http://www.ncbi.nlm.nih.gov/sites/entrez?Db=gene&Cmd=ShowDetailView&TermToSearch=9698&ordinalpos=1&itool=EntrezSystem2.PEntrez.Gene.Gene_ResultsPanel.Gene_RVDocSum	PUM1	PUM1	82	http://www.ncbi.nlm.nih.gov/sites/entrez?Db=gene&Cmd=ShowDetailView&TermToSearch=7805&ordinalpos=1&itool=EntrezSystem2.PEntrez.Gene.Gene_ResultsPanel.Gene_RVDocSum	LAPTM5	LAPTM5	92	2	1.2	0.2	-0.1	0.003	0.069	0.42	-0.4	-0.3	-0.2	0	0.77	0.91	0.18
http://www.ensembl.org/Homo_sapiens/Variation/Summary?v=rs12405481	rs12405481	rs12405481	1	0.99	0.01	0	0	0.00037	0.72	0.17	-0.02	T	C	0.08	http://www.ncbi.nlm.nih.gov/sites/entrez?Db=gene&Cmd=ShowDetailView&TermToSearch=9672&ordinalpos=1&itool=EntrezSystem2.PEntrez.Gene.Gene_ResultsPanel.Gene_RVDocSum	SDC3	SDC3	22	http://www.ncbi.nlm.nih.gov/sites/entrez?Db=gene&Cmd=ShowDetailView&TermToSearch=9698&ordinalpos=1&itool=EntrezSystem2.PEntrez.Gene.Gene_ResultsPanel.Gene_RVDocSum	PUM1	PUM1	80	http://www.ncbi.nlm.nih.gov/sites/entrez?Db=gene&Cmd=ShowDetailView&TermToSearch=7805&ordinalpos=1&itool=EntrezSystem2.PEntrez.Gene.Gene_ResultsPanel.Gene_RVDocSum	LAPTM5	LAPTM5	93	2.1	1.2	0.2	-0.1	0.0026	0.07	0.4	-0.4	-0.3	-0.2	0	0.81	0.92	0.2
http://www.ensembl.org/Homo_sapiens/Variation/Summary?v=rs4949317	rs4949317	rs4949317	1	0.99	0.01	0	0	0.00037	0.72	0.17	-0.02	G	T	0.08	http://www.ncbi.nlm.nih.gov/sites/entrez?Db=gene&Cmd=ShowDetailView&TermToSearch=9672&ordinalpos=1&itool=EntrezSystem2.PEntrez.Gene.Gene_ResultsPanel.Gene_RVDocSum	SDC3	SDC3	20	http://www.ncbi.nlm.nih.gov/sites/entrez?Db=gene&Cmd=ShowDetailView&TermToSearch=9698&ordinalpos=1&itool=EntrezSystem2.PEntrez.Gene.Gene_ResultsPanel.Gene_RVDocSum	PUM1	PUM1	78	http://www.ncbi.nlm.nih.gov/sites/entrez?Db=gene&Cmd=ShowDetailView&TermToSearch=7805&ordinalpos=1&itool=EntrezSystem2.PEntrez.Gene.Gene_ResultsPanel.Gene_RVDocSum	LAPTM5	LAPTM5	96	2.1	1.2	0.2	-0.1	0.0027	0.069	0.41	-0.4	-0.3	-0.2	0	0.83	0.94	0.19
http://www.ensembl.org/Homo_sapiens/Variation/Summary?v=rs12566046	rs12566046	rs12566046	1	0.99	0.01	0	0	0.00039	0.77	0.17	-0.01	G	C	0.08	http://www.ncbi.nlm.nih.gov/sites/entrez?Db=gene&Cmd=ShowDetailView&TermToSearch=9672&ordinalpos=1&itool=EntrezSystem2.PEntrez.Gene.Gene_ResultsPanel.Gene_RVDocSum	SDC3	SDC3	18	http://www.ncbi.nlm.nih.gov/sites/entrez?Db=gene&Cmd=ShowDetailView&TermToSearch=9698&ordinalpos=1&itool=EntrezSystem2.PEntrez.Gene.Gene_ResultsPanel.Gene_RVDocSum	PUM1	PUM1	77	http://www.ncbi.nlm.nih.gov/sites/entrez?Db=gene&Cmd=ShowDetailView&TermToSearch=7805&ordinalpos=1&itool=EntrezSystem2.PEntrez.Gene.Gene_ResultsPanel.Gene_RVDocSum	LAPTM5	LAPTM5	97	2.1	1.2	0.2	-0.1	0.0031	0.066	0.4	-0.4	-0.4	-0.2	0	0.81	0.96	0.2
http://www.ensembl.org/Homo_sapiens/Variation/Summary?v=rs2428853	rs2428853	rs2428853	1	0.95	0.05	0	0	3.2e-05	0.086	-0.14	0.06	G	C	0.16	http://www.ncbi.nlm.nih.gov/sites/entrez?Db=gene&Cmd=ShowDetailView&TermToSearch=6487&ordinalpos=1&itool=EntrezSystem2.PEntrez.Gene.Gene_ResultsPanel.Gene_RVDocSum	ST3GAL3	ST3GAL3	0	http://www.ncbi.nlm.nih.gov/sites/entrez?Db=gene&Cmd=ShowDetailView&TermToSearch=9048&ordinalpos=1&itool=EntrezSystem2.PEntrez.Gene.Gene_ResultsPanel.Gene_RVDocSum	ARTN	ARTN	56	http://www.ncbi.nlm.nih.gov/sites/entrez?Db=gene&Cmd=ShowDetailView&TermToSearch=9670&ordinalpos=1&itool=EntrezSystem2.PEntrez.Gene.Gene_ResultsPanel.Gene_RVDocSum	IPO13	IPO13	69	2.7	2.9	-0.3	0.2	2e-05	0.59	0.059	0	-0.1	-0.4	0.2	0.16	0.94	0.062
http://www.ensembl.org/Homo_sapiens/Variation/Summary?v=rs2788371	rs2788371	rs2788371	1	0.98	0.02	0	0	9.2e-05	0.51	-0.15	0.03	G	A	0.11	http://www.ncbi.nlm.nih.gov/sites/entrez?Db=gene&Cmd=ShowDetailView&TermToSearch=6487&ordinalpos=1&itool=EntrezSystem2.PEntrez.Gene.Gene_ResultsPanel.Gene_RVDocSum	ST3GAL3	ST3GAL3	0	http://www.ncbi.nlm.nih.gov/sites/entrez?Db=gene&Cmd=ShowDetailView&TermToSearch=9048&ordinalpos=1&itool=EntrezSystem2.PEntrez.Gene.Gene_ResultsPanel.Gene_RVDocSum	ARTN	ARTN	55	http://www.ncbi.nlm.nih.gov/sites/entrez?Db=gene&Cmd=ShowDetailView&TermToSearch=9670&ordinalpos=1&itool=EntrezSystem2.PEntrez.Gene.Gene_ResultsPanel.Gene_RVDocSum	IPO13	IPO13	69	2.3	1.9	-0.3	0.4	0.0003	0.5	0.027	-0.4	-0.4	-0.3	-0.2	0.66	0.87	0.52
http://www.ensembl.org/Homo_sapiens/Variation/Summary?v=rs803676	rs803676	rs803676	1	0.98	0.02	0	0	7.6e-05	0.5	-0.15	0.03	A	G	0.11	http://www.ncbi.nlm.nih.gov/sites/entrez?Db=gene&Cmd=ShowDetailView&TermToSearch=6487&ordinalpos=1&itool=EntrezSystem2.PEntrez.Gene.Gene_ResultsPanel.Gene_RVDocSum	ST3GAL3	ST3GAL3	0	http://www.ncbi.nlm.nih.gov/sites/entrez?Db=gene&Cmd=ShowDetailView&TermToSearch=9048&ordinalpos=1&itool=EntrezSystem2.PEntrez.Gene.Gene_ResultsPanel.Gene_RVDocSum	ARTN	ARTN	47	http://www.ncbi.nlm.nih.gov/sites/entrez?Db=gene&Cmd=ShowDetailView&TermToSearch=9670&ordinalpos=1&itool=EntrezSystem2.PEntrez.Gene.Gene_ResultsPanel.Gene_RVDocSum	IPO13	IPO13	60	2.4	1.9	-0.2	0.4	0.00028	0.47	0.026	-0.4	-0.4	-0.3	-0.2	0.66	0.85	0.51
http://www.ensembl.org/Homo_sapiens/Variation/Summary?v=rs2428854	rs2428854	rs2428854	1	0.98	0.02	0	0	7.9e-05	0.55	-0.15	0.02	C	A	0.11	http://www.ncbi.nlm.nih.gov/sites/entrez?Db=gene&Cmd=ShowDetailView&TermToSearch=6487&ordinalpos=1&itool=EntrezSystem2.PEntrez.Gene.Gene_ResultsPanel.Gene_RVDocSum	ST3GAL3	ST3GAL3	0	http://www.ncbi.nlm.nih.gov/sites/entrez?Db=gene&Cmd=ShowDetailView&TermToSearch=9048&ordinalpos=1&itool=EntrezSystem2.PEntrez.Gene.Gene_ResultsPanel.Gene_RVDocSum	ARTN	ARTN	43	http://www.ncbi.nlm.nih.gov/sites/entrez?Db=gene&Cmd=ShowDetailView&TermToSearch=9670&ordinalpos=1&itool=EntrezSystem2.PEntrez.Gene.Gene_ResultsPanel.Gene_RVDocSum	IPO13	IPO13	56	2.4	1.9	-0.2	0.4	0.00031	0.46	0.022	-0.4	-0.4	-0.3	-0.2	0.7	0.89	0.54
http://www.ensembl.org/Homo_sapiens/Variation/Summary?v=rs803683	rs803683	rs803683	1	0.98	0.02	0	0	8e-05	0.55	-0.15	0.02	G	T	0.11	http://www.ncbi.nlm.nih.gov/sites/entrez?Db=gene&Cmd=ShowDetailView&TermToSearch=6487&ordinalpos=1&itool=EntrezSystem2.PEntrez.Gene.Gene_ResultsPanel.Gene_RVDocSum	ST3GAL3	ST3GAL3	0	http://www.ncbi.nlm.nih.gov/sites/entrez?Db=gene&Cmd=ShowDetailView&TermToSearch=9048&ordinalpos=1&itool=EntrezSystem2.PEntrez.Gene.Gene_ResultsPanel.Gene_RVDocSum	ARTN	ARTN	41	http://www.ncbi.nlm.nih.gov/sites/entrez?Db=gene&Cmd=ShowDetailView&TermToSearch=9670&ordinalpos=1&itool=EntrezSystem2.PEntrez.Gene.Gene_ResultsPanel.Gene_RVDocSum	IPO13	IPO13	54	2.4	1.9	-0.3	0.4	0.00031	0.46	0.022	-0.4	-0.4	-0.3	-0.2	0.7	0.9	0.53
http://www.ensembl.org/Homo_sapiens/Variation/Summary?v=rs803681	rs803681	rs803681	1	0.98	0.02	0	0	0.0001	0.51	-0.14	0.02	C	A	0.12	http://www.ncbi.nlm.nih.gov/sites/entrez?Db=gene&Cmd=ShowDetailView&TermToSearch=6487&ordinalpos=1&itool=EntrezSystem2.PEntrez.Gene.Gene_ResultsPanel.Gene_RVDocSum	ST3GAL3	ST3GAL3	0	http://www.ncbi.nlm.nih.gov/sites/entrez?Db=gene&Cmd=ShowDetailView&TermToSearch=9048&ordinalpos=1&itool=EntrezSystem2.PEntrez.Gene.Gene_ResultsPanel.Gene_RVDocSum	ARTN	ARTN	36	http://www.ncbi.nlm.nih.gov/sites/entrez?Db=gene&Cmd=ShowDetailView&TermToSearch=9670&ordinalpos=1&itool=EntrezSystem2.PEntrez.Gene.Gene_ResultsPanel.Gene_RVDocSum	IPO13	IPO13	50	2.3	1.8	-0.3	0.4	0.00034	0.47	0.024	-0.4	-0.4	-0.3	-0.2	0.69	0.91	0.44
http://www.ensembl.org/Homo_sapiens/Variation/Summary?v=rs783303	rs783303	rs783303	1	0.98	0.02	0	0	0.00011	0.56	-0.14	0.02	G	A	0.11	http://www.ncbi.nlm.nih.gov/sites/entrez?Db=gene&Cmd=ShowDetailView&TermToSearch=6487&ordinalpos=1&itool=EntrezSystem2.PEntrez.Gene.Gene_ResultsPanel.Gene_RVDocSum	ST3GAL3	ST3GAL3	0	http://www.ncbi.nlm.nih.gov/sites/entrez?Db=gene&Cmd=ShowDetailView&TermToSearch=9048&ordinalpos=1&itool=EntrezSystem2.PEntrez.Gene.Gene_ResultsPanel.Gene_RVDocSum	ARTN	ARTN	33	http://www.ncbi.nlm.nih.gov/sites/entrez?Db=gene&Cmd=ShowDetailView&TermToSearch=9670&ordinalpos=1&itool=EntrezSystem2.PEntrez.Gene.Gene_ResultsPanel.Gene_RVDocSum	IPO13	IPO13	47	2.3	1.8	-0.3	0.4	0.0004	0.47	0.024	-0.4	-0.4	-0.3	-0.2	0.73	0.9	0.5
http://www.ensembl.org/Homo_sapiens/Variation/Summary?v=rs10749691	rs10749691	rs10749691	1	0.89	0.1	0	0.01	1.3e-05	0.18	-0.19	-0.06	G	T	0.16	http://www.ncbi.nlm.nih.gov/sites/entrez?Db=gene&Cmd=ShowDetailView&TermToSearch=148979&ordinalpos=1&itool=EntrezSystem2.PEntrez.Gene.Gene_ResultsPanel.Gene_RVDocSum	GLIS1	GLIS1	0	http://www.ncbi.nlm.nih.gov/sites/entrez?Db=gene&Cmd=ShowDetailView&TermToSearch=63948&ordinalpos=1&itool=EntrezSystem2.PEntrez.Gene.Gene_ResultsPanel.Gene_RVDocSum	DMRTB1	DMRTB1	42	http://www.ncbi.nlm.nih.gov/sites/entrez?Db=gene&Cmd=ShowDetailView&TermToSearch=163742&ordinalpos=1&itool=EntrezSystem2.PEntrez.Gene.Gene_ResultsPanel.Gene_RVDocSum	FLJ40434	FLJ40434	70	3.1	0.9	1.1	0.4	0.0024	0.0042	0.028	-0.2	0	-0.1	-0.3	0.21	0.17	0.83
http://www.ensembl.org/Homo_sapiens/Variation/Summary?v=rs2280511	rs2280511	rs2280511	1	0.94	0.06	0	0	2.6e-05	0.16	-0.17	-0.06	C	T	0.14	http://www.ncbi.nlm.nih.gov/sites/entrez?Db=gene&Cmd=ShowDetailView&TermToSearch=148979&ordinalpos=1&itool=EntrezSystem2.PEntrez.Gene.Gene_ResultsPanel.Gene_RVDocSum	GLIS1	GLIS1	0	http://www.ncbi.nlm.nih.gov/sites/entrez?Db=gene&Cmd=ShowDetailView&TermToSearch=63948&ordinalpos=1&itool=EntrezSystem2.PEntrez.Gene.Gene_ResultsPanel.Gene_RVDocSum	DMRTB1	DMRTB1	43	http://www.ncbi.nlm.nih.gov/sites/entrez?Db=gene&Cmd=ShowDetailView&TermToSearch=163742&ordinalpos=1&itool=EntrezSystem2.PEntrez.Gene.Gene_ResultsPanel.Gene_RVDocSum	FLJ40434	FLJ40434	71	2.8	0.8	1	0.4	0.004	0.0051	0.033	-0.2	0.1	-0.1	-0.3	0.12	0.17	0.83
http://www.ensembl.org/Homo_sapiens/Variation/Summary?v=rs6588480	rs6588480	rs6588480	1	0.85	0.14	0	0.01	7.6e-06	0.32	-0.17	-0.04	A	G	0.15	http://www.ncbi.nlm.nih.gov/sites/entrez?Db=gene&Cmd=ShowDetailView&TermToSearch=148979&ordinalpos=1&itool=EntrezSystem2.PEntrez.Gene.Gene_ResultsPanel.Gene_RVDocSum	GLIS1	GLIS1	0	http://www.ncbi.nlm.nih.gov/sites/entrez?Db=gene&Cmd=ShowDetailView&TermToSearch=63948&ordinalpos=1&itool=EntrezSystem2.PEntrez.Gene.Gene_ResultsPanel.Gene_RVDocSum	DMRTB1	DMRTB1	45	http://www.ncbi.nlm.nih.gov/sites/entrez?Db=gene&Cmd=ShowDetailView&TermToSearch=163742&ordinalpos=1&itool=EntrezSystem2.PEntrez.Gene.Gene_ResultsPanel.Gene_RVDocSum	FLJ40434	FLJ40434	73	3.3	1.5	0.1	0.9	0.00072	0.092	0.0035	-0.3	0.2	-0.3	0	0.06	0.52	0.2
http://www.ensembl.org/Homo_sapiens/Variation/Summary?v=rs6657811	rs6657811	rs6657811	1	0.92	0.08	0	0	1.7e-05	0.36	-0.21	0.05	T	A	0.12	http://www.ncbi.nlm.nih.gov/sites/entrez?Db=gene&Cmd=ShowDetailView&TermToSearch=1952&ordinalpos=1&itool=EntrezSystem2.PEntrez.Gene.Gene_ResultsPanel.Gene_RVDocSum	CELSR2	CELSR2	0	http://www.ncbi.nlm.nih.gov/sites/entrez?Db=gene&Cmd=ShowDetailView&TermToSearch=84722&ordinalpos=1&itool=EntrezSystem2.PEntrez.Gene.Gene_ResultsPanel.Gene_RVDocSum	PSRC1	PSRC1	15	http://www.ncbi.nlm.nih.gov/sites/entrez?Db=gene&Cmd=ShowDetailView&TermToSearch=6301&ordinalpos=1&itool=EntrezSystem2.PEntrez.Gene.Gene_ResultsPanel.Gene_RVDocSum	SARS	SARS	26	3	-0.1	2.2	0.5	0.26	8.5e-05	0.016	-0.3	-0.2	0	0	0.36	0.13	0.2
http://www.ensembl.org/Homo_sapiens/Variation/Summary?v=rs4970834	rs4970834	rs4970834	1	0.97	0.03	0	0	5.9e-05	0.39	-0.16	0.03	T	C	0.19	http://www.ncbi.nlm.nih.gov/sites/entrez?Db=gene&Cmd=ShowDetailView&TermToSearch=1952&ordinalpos=1&itool=EntrezSystem2.PEntrez.Gene.Gene_ResultsPanel.Gene_RVDocSum	CELSR2	CELSR2	0	http://www.ncbi.nlm.nih.gov/sites/entrez?Db=gene&Cmd=ShowDetailView&TermToSearch=84722&ordinalpos=1&itool=EntrezSystem2.PEntrez.Gene.Gene_ResultsPanel.Gene_RVDocSum	PSRC1	PSRC1	7	http://www.ncbi.nlm.nih.gov/sites/entrez?Db=gene&Cmd=ShowDetailView&TermToSearch=343263&ordinalpos=1&itool=EntrezSystem2.PEntrez.Gene.Gene_ResultsPanel.Gene_RVDocSum	MYBPHL	MYBPHL	20	2.5	0	1.1	0.6	0.12	0.0025	0.013	-0.4	-0.1	-0.2	0	0.17	0.34	0.14
http://www.ensembl.org/Homo_sapiens/Variation/Summary?v=rs611917	rs611917	rs611917	1	0.98	0.02	0	0	7.8e-05	0.64	-0.11	0.01	G	A	0.29	http://www.ncbi.nlm.nih.gov/sites/entrez?Db=gene&Cmd=ShowDetailView&TermToSearch=1952&ordinalpos=1&itool=EntrezSystem2.PEntrez.Gene.Gene_ResultsPanel.Gene_RVDocSum	CELSR2	CELSR2	0	http://www.ncbi.nlm.nih.gov/sites/entrez?Db=gene&Cmd=ShowDetailView&TermToSearch=84722&ordinalpos=1&itool=EntrezSystem2.PEntrez.Gene.Gene_ResultsPanel.Gene_RVDocSum	PSRC1	PSRC1	7	http://www.ncbi.nlm.nih.gov/sites/entrez?Db=gene&Cmd=ShowDetailView&TermToSearch=343263&ordinalpos=1&itool=EntrezSystem2.PEntrez.Gene.Gene_ResultsPanel.Gene_RVDocSum	MYBPHL	MYBPHL	20	2.4	0	1	0.6	0.11	0.0039	0.011	-0.6	-0.3	-0.4	-0.1	0.33	0.53	0.19
http://www.ensembl.org/Homo_sapiens/Variation/Summary?v=rs7528419	rs7528419	rs7528419	1	0.78	0.21	0	0.01	5.4e-06	0.49	-0.14	0.02	G	A	0.2	http://www.ncbi.nlm.nih.gov/sites/entrez?Db=gene&Cmd=ShowDetailView&TermToSearch=1952&ordinalpos=1&itool=EntrezSystem2.PEntrez.Gene.Gene_ResultsPanel.Gene_RVDocSum	CELSR2	CELSR2	0	http://www.ncbi.nlm.nih.gov/sites/entrez?Db=gene&Cmd=ShowDetailView&TermToSearch=84722&ordinalpos=1&itool=EntrezSystem2.PEntrez.Gene.Gene_ResultsPanel.Gene_RVDocSum	PSRC1	PSRC1	5	http://www.ncbi.nlm.nih.gov/sites/entrez?Db=gene&Cmd=ShowDetailView&TermToSearch=343263&ordinalpos=1&itool=EntrezSystem2.PEntrez.Gene.Gene_ResultsPanel.Gene_RVDocSum	MYBPHL	MYBPHL	18	3.5	0	2	1	0.099	0.00019	0.0036	-0.5	-0.1	-0.2	0.6	0.13	0.28	0.014
http://www.ensembl.org/Homo_sapiens/Variation/Summary?v=rs12740374	rs12740374	rs12740374	1	0.79	0.21	0	0.01	5.5e-06	0.48	-0.14	0.02	T	G	0.19	http://www.ncbi.nlm.nih.gov/sites/entrez?Db=gene&Cmd=ShowDetailView&TermToSearch=1952&ordinalpos=1&itool=EntrezSystem2.PEntrez.Gene.Gene_ResultsPanel.Gene_RVDocSum	CELSR2	CELSR2	0	http://www.ncbi.nlm.nih.gov/sites/entrez?Db=gene&Cmd=ShowDetailView&TermToSearch=84722&ordinalpos=1&itool=EntrezSystem2.PEntrez.Gene.Gene_ResultsPanel.Gene_RVDocSum	PSRC1	PSRC1	5	http://www.ncbi.nlm.nih.gov/sites/entrez?Db=gene&Cmd=ShowDetailView&TermToSearch=343263&ordinalpos=1&itool=EntrezSystem2.PEntrez.Gene.Gene_ResultsPanel.Gene_RVDocSum	MYBPHL	MYBPHL	17	3.5	0	2	1	0.099	0.0002	0.0035	-0.5	-0.1	-0.2	0.6	0.13	0.28	0.015
http://www.ensembl.org/Homo_sapiens/Variation/Summary?v=rs660240	rs660240	rs660240	1	0.8	0.2	0	0.01	5.8e-06	0.47	-0.14	0.02	T	C	0.18	http://www.ncbi.nlm.nih.gov/sites/entrez?Db=gene&Cmd=ShowDetailView&TermToSearch=1952&ordinalpos=1&itool=EntrezSystem2.PEntrez.Gene.Gene_ResultsPanel.Gene_RVDocSum	CELSR2	CELSR2	0	http://www.ncbi.nlm.nih.gov/sites/entrez?Db=gene&Cmd=ShowDetailView&TermToSearch=84722&ordinalpos=1&itool=EntrezSystem2.PEntrez.Gene.Gene_ResultsPanel.Gene_RVDocSum	PSRC1	PSRC1	4	http://www.ncbi.nlm.nih.gov/sites/entrez?Db=gene&Cmd=ShowDetailView&TermToSearch=343263&ordinalpos=1&itool=EntrezSystem2.PEntrez.Gene.Gene_ResultsPanel.Gene_RVDocSum	MYBPHL	MYBPHL	17	3.4	0	1.9	0.9	0.088	0.00028	0.0045	-0.5	-0.1	-0.2	0.5	0.14	0.26	0.02
http://www.ensembl.org/Homo_sapiens/Variation/Summary?v=rs629301	rs629301	rs629301	1	0.82	0.18	0	0.01	6.7e-06	0.46	-0.13	0.02	G	T	0.19	http://www.ncbi.nlm.nih.gov/sites/entrez?Db=gene&Cmd=ShowDetailView&TermToSearch=1952&ordinalpos=1&itool=EntrezSystem2.PEntrez.Gene.Gene_ResultsPanel.Gene_RVDocSum	CELSR2	CELSR2	0	http://www.ncbi.nlm.nih.gov/sites/entrez?Db=gene&Cmd=ShowDetailView&TermToSearch=84722&ordinalpos=1&itool=EntrezSystem2.PEntrez.Gene.Gene_ResultsPanel.Gene_RVDocSum	PSRC1	PSRC1	4	http://www.ncbi.nlm.nih.gov/sites/entrez?Db=gene&Cmd=ShowDetailView&TermToSearch=343263&ordinalpos=1&itool=EntrezSystem2.PEntrez.Gene.Gene_ResultsPanel.Gene_RVDocSum	MYBPHL	MYBPHL	17	3.4	0	2	1	0.095	0.0002	0.0034	-0.5	-0.1	-0.2	0.5	0.13	0.28	0.015
http://www.ensembl.org/Homo_sapiens/Variation/Summary?v=rs646776	rs646776	rs646776	1	0.75	0.24	0	0.01	4.2e-06	0.52	-0.13	0.02	C	T	0.19	http://www.ncbi.nlm.nih.gov/sites/entrez?Db=gene&Cmd=ShowDetailView&TermToSearch=1952&ordinalpos=1&itool=EntrezSystem2.PEntrez.Gene.Gene_ResultsPanel.Gene_RVDocSum	CELSR2	CELSR2	0	http://www.ncbi.nlm.nih.gov/sites/entrez?Db=gene&Cmd=ShowDetailView&TermToSearch=84722&ordinalpos=1&itool=EntrezSystem2.PEntrez.Gene.Gene_ResultsPanel.Gene_RVDocSum	PSRC1	PSRC1	4	http://www.ncbi.nlm.nih.gov/sites/entrez?Db=gene&Cmd=ShowDetailView&TermToSearch=343263&ordinalpos=1&itool=EntrezSystem2.PEntrez.Gene.Gene_ResultsPanel.Gene_RVDocSum	MYBPHL	MYBPHL	16	3.6	0	2.1	1.1	0.095	0.00016	0.0025	-0.6	-0.1	-0.3	0.6	0.13	0.33	0.015
http://www.ensembl.org/Homo_sapiens/Variation/Summary?v=rs602633	rs602633	rs602633	1	0.79	0.2	0	0.01	5.5e-06	0.35	-0.14	0.03	T	G	0.21	http://www.ncbi.nlm.nih.gov/sites/entrez?Db=gene&Cmd=ShowDetailView&TermToSearch=84722&ordinalpos=1&itool=EntrezSystem2.PEntrez.Gene.Gene_ResultsPanel.Gene_RVDocSum	PSRC1	PSRC1	1	http://www.ncbi.nlm.nih.gov/sites/entrez?Db=gene&Cmd=ShowDetailView&TermToSearch=1952&ordinalpos=1&itool=EntrezSystem2.PEntrez.Gene.Gene_ResultsPanel.Gene_RVDocSum	CELSR2	CELSR2	3	http://www.ncbi.nlm.nih.gov/sites/entrez?Db=gene&Cmd=ShowDetailView&TermToSearch=343263&ordinalpos=1&itool=EntrezSystem2.PEntrez.Gene.Gene_ResultsPanel.Gene_RVDocSum	MYBPHL	MYBPHL	13	3.5	0	1.9	1	0.1	0.00025	0.0036	-0.4	-0.1	-0.1	0.3	0.12	0.2	0.034
http://www.ensembl.org/Homo_sapiens/Variation/Summary?v=rs599839	rs599839	rs599839	1	0.81	0.18	0	0.01	6.4e-06	0.35	-0.14	0.03	G	A	0.22	http://www.ncbi.nlm.nih.gov/sites/entrez?Db=gene&Cmd=ShowDetailView&TermToSearch=84722&ordinalpos=1&itool=EntrezSystem2.PEntrez.Gene.Gene_ResultsPanel.Gene_RVDocSum	PSRC1	PSRC1	0	http://www.ncbi.nlm.nih.gov/sites/entrez?Db=gene&Cmd=ShowDetailView&TermToSearch=1952&ordinalpos=1&itool=EntrezSystem2.PEntrez.Gene.Gene_ResultsPanel.Gene_RVDocSum	CELSR2	CELSR2	4	http://www.ncbi.nlm.nih.gov/sites/entrez?Db=gene&Cmd=ShowDetailView&TermToSearch=343263&ordinalpos=1&itool=EntrezSystem2.PEntrez.Gene.Gene_ResultsPanel.Gene_RVDocSum	MYBPHL	MYBPHL	13	3.4	0	2	1.1	0.11	0.00019	0.003	-0.4	-0.1	-0.2	0.4	0.12	0.21	0.028
http://www.ensembl.org/Homo_sapiens/Variation/Summary?v=rs4839549	rs4839549	rs4839549	1	0.99	0.01	0	0	0.00016	0.93	0.21	0.01	A	G	0.08	http://www.ncbi.nlm.nih.gov/sites/entrez?Db=gene&Cmd=ShowDetailView&TermToSearch=728161&ordinalpos=1&itool=EntrezSystem2.PEntrez.Gene.Gene_ResultsPanel.Gene_RVDocSum	LOC728161	LOC728161	27	http://www.ncbi.nlm.nih.gov/sites/entrez?Db=gene&Cmd=ShowDetailView&TermToSearch=3737&ordinalpos=1&itool=EntrezSystem2.PEntrez.Gene.Gene_ResultsPanel.Gene_RVDocSum	KCNA2	KCNA2	29	http://www.ncbi.nlm.nih.gov/sites/entrez?Db=gene&Cmd=ShowDetailView&TermToSearch=3738&ordinalpos=1&itool=EntrezSystem2.PEntrez.Gene.Gene_ResultsPanel.Gene_RVDocSum	KCNA3	KCNA3	37	2.1	0.2	0.9	0.2	0.081	0.0042	0.059	-0.4	0	-0.2	-0.2	0.22	0.44	0.73
http://www.ensembl.org/Homo_sapiens/Variation/Summary?v=rs2765542	rs2765542	rs2765542	1	0.99	0.01	0	0	0.00021	0.85	0.11	-0.01	A	T	0.27	http://www.ncbi.nlm.nih.gov/sites/entrez?Db=gene&Cmd=ShowDetailView&TermToSearch=10352&ordinalpos=1&itool=EntrezSystem2.PEntrez.Gene.Gene_ResultsPanel.Gene_RVDocSum	WARS2	WARS2	14	http://www.ncbi.nlm.nih.gov/sites/entrez?Db=gene&Cmd=ShowDetailView&TermToSearch=6913&ordinalpos=1&itool=EntrezSystem2.PEntrez.Gene.Gene_ResultsPanel.Gene_RVDocSum	TBX15	TBX15	28	http://www.ncbi.nlm.nih.gov/sites/entrez?Db=gene&Cmd=ShowDetailView&TermToSearch=343495&ordinalpos=1&itool=EntrezSystem2.PEntrez.Gene.Gene_ResultsPanel.Gene_RVDocSum	LOC343495	LOC343495	201	2	1.9	0.4	-0.3	0.00027	0.025	0.76	-0.6	-0.1	-0.4	-0.1	0.18	0.75	0.21
http://www.ensembl.org/Homo_sapiens/Variation/Summary?v=rs2645305	rs2645305	rs2645305	1	0.99	0.01	0	0	0.00018	0.81	0.12	-0.01	G	A	0.28	http://www.ncbi.nlm.nih.gov/sites/entrez?Db=gene&Cmd=ShowDetailView&TermToSearch=10352&ordinalpos=1&itool=EntrezSystem2.PEntrez.Gene.Gene_ResultsPanel.Gene_RVDocSum	WARS2	WARS2	12	http://www.ncbi.nlm.nih.gov/sites/entrez?Db=gene&Cmd=ShowDetailView&TermToSearch=6913&ordinalpos=1&itool=EntrezSystem2.PEntrez.Gene.Gene_ResultsPanel.Gene_RVDocSum	TBX15	TBX15	29	http://www.ncbi.nlm.nih.gov/sites/entrez?Db=gene&Cmd=ShowDetailView&TermToSearch=343495&ordinalpos=1&itool=EntrezSystem2.PEntrez.Gene.Gene_ResultsPanel.Gene_RVDocSum	LOC343495	LOC343495	200	2.1	2	0.4	-0.3	0.00026	0.025	0.82	-0.6	-0.2	-0.4	-0.1	0.18	0.83	0.2
http://www.ensembl.org/Homo_sapiens/Variation/Summary?v=rs17301853	rs17301853	rs17301853	1	0.99	0.01	0	0	0.00028	0.69	0.18	0.02	T	C	0.13	http://www.ncbi.nlm.nih.gov/sites/entrez?Db=gene&Cmd=ShowDetailView&TermToSearch=9910&ordinalpos=1&itool=EntrezSystem2.PEntrez.Gene.Gene_ResultsPanel.Gene_RVDocSum	RABGAP1L	RABGAP1L	0	http://www.ncbi.nlm.nih.gov/sites/entrez?Db=gene&Cmd=ShowDetailView&TermToSearch=9293&ordinalpos=1&itool=EntrezSystem2.PEntrez.Gene.Gene_ResultsPanel.Gene_RVDocSum	GPR52	GPR52	134	http://www.ncbi.nlm.nih.gov/sites/entrez?Db=gene&Cmd=ShowDetailView&TermToSearch=27101&ordinalpos=1&itool=EntrezSystem2.PEntrez.Gene.Gene_ResultsPanel.Gene_RVDocSum	CACYBP	CACYBP	416	2	0.6	0.4	0.2	0.015	0.025	0.096	-0.4	0.2	-0.3	-0.2	0.075	0.72	0.56
http://www.ensembl.org/Homo_sapiens/Variation/Summary?v=rs2438406	rs2438406	rs2438406	1	0.94	0.06	0	0	1.7e-05	0.77	0.31	-0.02	C	G	0.17	http://www.ncbi.nlm.nih.gov/sites/entrez?Db=gene&Cmd=ShowDetailView&TermToSearch=339479&ordinalpos=1&itool=EntrezSystem2.PEntrez.Gene.Gene_ResultsPanel.Gene_RVDocSum	FAM5C	FAM5C	354	http://www.ncbi.nlm.nih.gov/sites/entrez?Db=gene&Cmd=ShowDetailView&TermToSearch=647132&ordinalpos=1&itool=EntrezSystem2.PEntrez.Gene.Gene_ResultsPanel.Gene_RVDocSum	LOC647132	LOC647132	831	http://www.ncbi.nlm.nih.gov/sites/entrez?Db=gene&Cmd=ShowDetailView&TermToSearch=NA&ordinalpos=1&itool=EntrezSystem2.PEntrez.Gene.Gene_ResultsPanel.Gene_RVDocSum	NA	NA	NA	2.8	0.5	0.3	1	0.013	0.036	0.0013	-0.3	-0.2	-0.2	-0.1	0.85	0.79	0.6
http://www.ensembl.org/Homo_sapiens/Variation/Summary?v=rs10920808	rs10920808	rs10920808	1	0.89	0.11	0	0.01	5.3e-06	0.37	0.41	-0.08	A	C	0.11	http://www.ncbi.nlm.nih.gov/sites/entrez?Db=gene&Cmd=ShowDetailView&TermToSearch=339479&ordinalpos=1&itool=EntrezSystem2.PEntrez.Gene.Gene_ResultsPanel.Gene_RVDocSum	FAM5C	FAM5C	366	http://www.ncbi.nlm.nih.gov/sites/entrez?Db=gene&Cmd=ShowDetailView&TermToSearch=647132&ordinalpos=1&itool=EntrezSystem2.PEntrez.Gene.Gene_ResultsPanel.Gene_RVDocSum	LOC647132	LOC647132	843	http://www.ncbi.nlm.nih.gov/sites/entrez?Db=gene&Cmd=ShowDetailView&TermToSearch=NA&ordinalpos=1&itool=EntrezSystem2.PEntrez.Gene.Gene_ResultsPanel.Gene_RVDocSum	NA	NA	NA	3.1	1.3	0.2	0.7	0.00041	0.055	0.0037	-0.1	-0.1	-0.2	-0.1	0.44	0.79	0.52
http://www.ensembl.org/Homo_sapiens/Variation/Summary?v=rs4845251	rs4845251	rs4845251	1	0.87	0.12	0	0	1.3e-05	0.45	0.16	-0.03	G	T	0.2	http://www.ncbi.nlm.nih.gov/sites/entrez?Db=gene&Cmd=ShowDetailView&TermToSearch=339479&ordinalpos=1&itool=EntrezSystem2.PEntrez.Gene.Gene_ResultsPanel.Gene_RVDocSum	FAM5C	FAM5C	369	http://www.ncbi.nlm.nih.gov/sites/entrez?Db=gene&Cmd=ShowDetailView&TermToSearch=647132&ordinalpos=1&itool=EntrezSystem2.PEntrez.Gene.Gene_ResultsPanel.Gene_RVDocSum	LOC647132	LOC647132	846	http://www.ncbi.nlm.nih.gov/sites/entrez?Db=gene&Cmd=ShowDetailView&TermToSearch=NA&ordinalpos=1&itool=EntrezSystem2.PEntrez.Gene.Gene_ResultsPanel.Gene_RVDocSum	NA	NA	NA	3.2	1.3	0.2	1	0.0016	0.052	0.0042	-0.4	-0.2	-0.4	-0.2	0.44	0.87	0.61
http://www.ensembl.org/Homo_sapiens/Variation/Summary?v=rs12146125	rs12146125	rs12146125	1	0.88	0.12	0	0	1.4e-05	0.45	0.16	-0.03	G	T	0.19	http://www.ncbi.nlm.nih.gov/sites/entrez?Db=gene&Cmd=ShowDetailView&TermToSearch=339479&ordinalpos=1&itool=EntrezSystem2.PEntrez.Gene.Gene_ResultsPanel.Gene_RVDocSum	FAM5C	FAM5C	371	http://www.ncbi.nlm.nih.gov/sites/entrez?Db=gene&Cmd=ShowDetailView&TermToSearch=647132&ordinalpos=1&itool=EntrezSystem2.PEntrez.Gene.Gene_ResultsPanel.Gene_RVDocSum	LOC647132	LOC647132	848	http://www.ncbi.nlm.nih.gov/sites/entrez?Db=gene&Cmd=ShowDetailView&TermToSearch=NA&ordinalpos=1&itool=EntrezSystem2.PEntrez.Gene.Gene_ResultsPanel.Gene_RVDocSum	NA	NA	NA	3.2	1.3	0.2	1	0.0017	0.054	0.0043	-0.4	-0.2	-0.4	-0.2	0.42	0.88	0.63
http://www.ensembl.org/Homo_sapiens/Variation/Summary?v=rs10920810	rs10920810	rs10920810	1	0.88	0.12	0	0	1.5e-05	0.43	0.16	-0.03	A	C	0.19	http://www.ncbi.nlm.nih.gov/sites/entrez?Db=gene&Cmd=ShowDetailView&TermToSearch=339479&ordinalpos=1&itool=EntrezSystem2.PEntrez.Gene.Gene_ResultsPanel.Gene_RVDocSum	FAM5C	FAM5C	371	http://www.ncbi.nlm.nih.gov/sites/entrez?Db=gene&Cmd=ShowDetailView&TermToSearch=647132&ordinalpos=1&itool=EntrezSystem2.PEntrez.Gene.Gene_ResultsPanel.Gene_RVDocSum	LOC647132	LOC647132	849	http://www.ncbi.nlm.nih.gov/sites/entrez?Db=gene&Cmd=ShowDetailView&TermToSearch=NA&ordinalpos=1&itool=EntrezSystem2.PEntrez.Gene.Gene_ResultsPanel.Gene_RVDocSum	NA	NA	NA	3.2	1.3	0.2	1	0.0016	0.054	0.0047	-0.4	-0.2	-0.4	-0.2	0.42	0.85	0.62
http://www.ensembl.org/Homo_sapiens/Variation/Summary?v=rs10800972	rs10800972	rs10800972	1	0.88	0.12	0	0	1.4e-05	0.46	0.16	-0.03	A	C	0.19	http://www.ncbi.nlm.nih.gov/sites/entrez?Db=gene&Cmd=ShowDetailView&TermToSearch=339479&ordinalpos=1&itool=EntrezSystem2.PEntrez.Gene.Gene_ResultsPanel.Gene_RVDocSum	FAM5C	FAM5C	371	http://www.ncbi.nlm.nih.gov/sites/entrez?Db=gene&Cmd=ShowDetailView&TermToSearch=647132&ordinalpos=1&itool=EntrezSystem2.PEntrez.Gene.Gene_ResultsPanel.Gene_RVDocSum	LOC647132	LOC647132	849	http://www.ncbi.nlm.nih.gov/sites/entrez?Db=gene&Cmd=ShowDetailView&TermToSearch=NA&ordinalpos=1&itool=EntrezSystem2.PEntrez.Gene.Gene_ResultsPanel.Gene_RVDocSum	NA	NA	NA	3.2	1.3	0.2	1	0.0016	0.055	0.0045	-0.4	-0.2	-0.4	-0.2	0.42	0.89	0.63
http://www.ensembl.org/Homo_sapiens/Variation/Summary?v=rs2419925	rs2419925	rs2419925	1	0.87	0.12	0	0	1.3e-05	0.46	0.16	-0.03	A	T	0.19	http://www.ncbi.nlm.nih.gov/sites/entrez?Db=gene&Cmd=ShowDetailView&TermToSearch=339479&ordinalpos=1&itool=EntrezSystem2.PEntrez.Gene.Gene_ResultsPanel.Gene_RVDocSum	FAM5C	FAM5C	372	http://www.ncbi.nlm.nih.gov/sites/entrez?Db=gene&Cmd=ShowDetailView&TermToSearch=647132&ordinalpos=1&itool=EntrezSystem2.PEntrez.Gene.Gene_ResultsPanel.Gene_RVDocSum	LOC647132	LOC647132	849	http://www.ncbi.nlm.nih.gov/sites/entrez?Db=gene&Cmd=ShowDetailView&TermToSearch=NA&ordinalpos=1&itool=EntrezSystem2.PEntrez.Gene.Gene_ResultsPanel.Gene_RVDocSum	NA	NA	NA	3.2	1.3	0.2	1	0.0015	0.054	0.0045	-0.4	-0.2	-0.4	-0.2	0.42	0.9	0.63
http://www.ensembl.org/Homo_sapiens/Variation/Summary?v=rs2118650	rs2118650	rs2118650	1	0.84	0.16	0	0	8e-06	0.57	0.16	-0.02	G	T	0.2	http://www.ncbi.nlm.nih.gov/sites/entrez?Db=gene&Cmd=ShowDetailView&TermToSearch=339479&ordinalpos=1&itool=EntrezSystem2.PEntrez.Gene.Gene_ResultsPanel.Gene_RVDocSum	FAM5C	FAM5C	377	http://www.ncbi.nlm.nih.gov/sites/entrez?Db=gene&Cmd=ShowDetailView&TermToSearch=647132&ordinalpos=1&itool=EntrezSystem2.PEntrez.Gene.Gene_ResultsPanel.Gene_RVDocSum	LOC647132	LOC647132	854	http://www.ncbi.nlm.nih.gov/sites/entrez?Db=gene&Cmd=ShowDetailView&TermToSearch=NA&ordinalpos=1&itool=EntrezSystem2.PEntrez.Gene.Gene_ResultsPanel.Gene_RVDocSum	NA	NA	NA	3.3	1.5	0.1	1.1	0.0011	0.067	0.0029	-0.5	-0.2	-0.4	-0.2	0.35	0.73	0.57
http://www.ensembl.org/Homo_sapiens/Variation/Summary?v=rs1936992	rs1936992	rs1936992	1	0.84	0.15	0	0	8.3e-06	0.58	0.16	-0.02	G	A	0.2	http://www.ncbi.nlm.nih.gov/sites/entrez?Db=gene&Cmd=ShowDetailView&TermToSearch=339479&ordinalpos=1&itool=EntrezSystem2.PEntrez.Gene.Gene_ResultsPanel.Gene_RVDocSum	FAM5C	FAM5C	379	http://www.ncbi.nlm.nih.gov/sites/entrez?Db=gene&Cmd=ShowDetailView&TermToSearch=647132&ordinalpos=1&itool=EntrezSystem2.PEntrez.Gene.Gene_ResultsPanel.Gene_RVDocSum	LOC647132	LOC647132	856	http://www.ncbi.nlm.nih.gov/sites/entrez?Db=gene&Cmd=ShowDetailView&TermToSearch=NA&ordinalpos=1&itool=EntrezSystem2.PEntrez.Gene.Gene_ResultsPanel.Gene_RVDocSum	NA	NA	NA	3.3	1.5	0.1	1.1	0.0011	0.067	0.0029	-0.5	-0.2	-0.4	-0.2	0.35	0.72	0.58
http://www.ensembl.org/Homo_sapiens/Variation/Summary?v=rs2105423	rs2105423	rs2105423	1	0.83	0.16	0	0.01	7.7e-06	0.58	0.16	-0.02	A	G	0.2	http://www.ncbi.nlm.nih.gov/sites/entrez?Db=gene&Cmd=ShowDetailView&TermToSearch=339479&ordinalpos=1&itool=EntrezSystem2.PEntrez.Gene.Gene_ResultsPanel.Gene_RVDocSum	FAM5C	FAM5C	386	http://www.ncbi.nlm.nih.gov/sites/entrez?Db=gene&Cmd=ShowDetailView&TermToSearch=647132&ordinalpos=1&itool=EntrezSystem2.PEntrez.Gene.Gene_ResultsPanel.Gene_RVDocSum	LOC647132	LOC647132	863	http://www.ncbi.nlm.nih.gov/sites/entrez?Db=gene&Cmd=ShowDetailView&TermToSearch=NA&ordinalpos=1&itool=EntrezSystem2.PEntrez.Gene.Gene_ResultsPanel.Gene_RVDocSum	NA	NA	NA	3.3	1.5	0.1	1.1	0.001	0.069	0.0027	-0.5	-0.2	-0.4	-0.2	0.35	0.7	0.58
http://www.ensembl.org/Homo_sapiens/Variation/Summary?v=rs1438533	rs1438533	rs1438533	1	0.81	0.19	0	0.01	6.4e-06	0.57	0.16	-0.02	C	T	0.2	http://www.ncbi.nlm.nih.gov/sites/entrez?Db=gene&Cmd=ShowDetailView&TermToSearch=339479&ordinalpos=1&itool=EntrezSystem2.PEntrez.Gene.Gene_ResultsPanel.Gene_RVDocSum	FAM5C	FAM5C	387	http://www.ncbi.nlm.nih.gov/sites/entrez?Db=gene&Cmd=ShowDetailView&TermToSearch=647132&ordinalpos=1&itool=EntrezSystem2.PEntrez.Gene.Gene_ResultsPanel.Gene_RVDocSum	LOC647132	LOC647132	864	http://www.ncbi.nlm.nih.gov/sites/entrez?Db=gene&Cmd=ShowDetailView&TermToSearch=NA&ordinalpos=1&itool=EntrezSystem2.PEntrez.Gene.Gene_ResultsPanel.Gene_RVDocSum	NA	NA	NA	3.4	1.5	0.1	1.1	0.00091	0.068	0.0026	-0.5	-0.2	-0.4	-0.2	0.35	0.71	0.58
http://www.ensembl.org/Homo_sapiens/Variation/Summary?v=rs1370882	rs1370882	rs1370882	1	0.8	0.19	0	0.01	6.3e-06	0.57	0.16	-0.02	T	C	0.2	http://www.ncbi.nlm.nih.gov/sites/entrez?Db=gene&Cmd=ShowDetailView&TermToSearch=339479&ordinalpos=1&itool=EntrezSystem2.PEntrez.Gene.Gene_ResultsPanel.Gene_RVDocSum	FAM5C	FAM5C	387	http://www.ncbi.nlm.nih.gov/sites/entrez?Db=gene&Cmd=ShowDetailView&TermToSearch=647132&ordinalpos=1&itool=EntrezSystem2.PEntrez.Gene.Gene_ResultsPanel.Gene_RVDocSum	LOC647132	LOC647132	864	http://www.ncbi.nlm.nih.gov/sites/entrez?Db=gene&Cmd=ShowDetailView&TermToSearch=NA&ordinalpos=1&itool=EntrezSystem2.PEntrez.Gene.Gene_ResultsPanel.Gene_RVDocSum	NA	NA	NA	3.4	1.6	0.1	1.1	0.00089	0.069	0.0026	-0.5	-0.2	-0.4	-0.2	0.34	0.71	0.58
http://www.ensembl.org/Homo_sapiens/Variation/Summary?v=rs7521393	rs7521393	rs7521393	1	0.8	0.19	0	0.01	6.2e-06	0.56	0.16	-0.02	C	T	0.2	http://www.ncbi.nlm.nih.gov/sites/entrez?Db=gene&Cmd=ShowDetailView&TermToSearch=339479&ordinalpos=1&itool=EntrezSystem2.PEntrez.Gene.Gene_ResultsPanel.Gene_RVDocSum	FAM5C	FAM5C	387	http://www.ncbi.nlm.nih.gov/sites/entrez?Db=gene&Cmd=ShowDetailView&TermToSearch=647132&ordinalpos=1&itool=EntrezSystem2.PEntrez.Gene.Gene_ResultsPanel.Gene_RVDocSum	LOC647132	LOC647132	864	http://www.ncbi.nlm.nih.gov/sites/entrez?Db=gene&Cmd=ShowDetailView&TermToSearch=NA&ordinalpos=1&itool=EntrezSystem2.PEntrez.Gene.Gene_ResultsPanel.Gene_RVDocSum	NA	NA	NA	3.4	1.6	0.1	1.1	0.00088	0.069	0.0026	-0.5	-0.2	-0.4	-0.2	0.34	0.72	0.58
http://www.ensembl.org/Homo_sapiens/Variation/Summary?v=rs1438532	rs1438532	rs1438532	1	0.8	0.2	0	0.01	6.1e-06	0.56	0.16	-0.02	T	G	0.2	http://www.ncbi.nlm.nih.gov/sites/entrez?Db=gene&Cmd=ShowDetailView&TermToSearch=339479&ordinalpos=1&itool=EntrezSystem2.PEntrez.Gene.Gene_ResultsPanel.Gene_RVDocSum	FAM5C	FAM5C	388	http://www.ncbi.nlm.nih.gov/sites/entrez?Db=gene&Cmd=ShowDetailView&TermToSearch=647132&ordinalpos=1&itool=EntrezSystem2.PEntrez.Gene.Gene_ResultsPanel.Gene_RVDocSum	LOC647132	LOC647132	865	http://www.ncbi.nlm.nih.gov/sites/entrez?Db=gene&Cmd=ShowDetailView&TermToSearch=NA&ordinalpos=1&itool=EntrezSystem2.PEntrez.Gene.Gene_ResultsPanel.Gene_RVDocSum	NA	NA	NA	3.4	1.6	0.1	1.1	0.00086	0.07	0.0026	-0.5	-0.2	-0.4	-0.2	0.34	0.72	0.58
http://www.ensembl.org/Homo_sapiens/Variation/Summary?v=rs1438531	rs1438531	rs1438531	1	0.8	0.2	0	0.01	6e-06	0.56	0.16	-0.02	T	C	0.2	http://www.ncbi.nlm.nih.gov/sites/entrez?Db=gene&Cmd=ShowDetailView&TermToSearch=339479&ordinalpos=1&itool=EntrezSystem2.PEntrez.Gene.Gene_ResultsPanel.Gene_RVDocSum	FAM5C	FAM5C	388	http://www.ncbi.nlm.nih.gov/sites/entrez?Db=gene&Cmd=ShowDetailView&TermToSearch=647132&ordinalpos=1&itool=EntrezSystem2.PEntrez.Gene.Gene_ResultsPanel.Gene_RVDocSum	LOC647132	LOC647132	865	http://www.ncbi.nlm.nih.gov/sites/entrez?Db=gene&Cmd=ShowDetailView&TermToSearch=NA&ordinalpos=1&itool=EntrezSystem2.PEntrez.Gene.Gene_ResultsPanel.Gene_RVDocSum	NA	NA	NA	3.4	1.6	0.1	1.1	0.00086	0.069	0.0026	-0.5	-0.2	-0.4	-0.2	0.34	0.72	0.58
http://www.ensembl.org/Homo_sapiens/Variation/Summary?v=rs1438530	rs1438530	rs1438530	1	0.8	0.19	0	0.01	6.3e-06	0.55	0.16	-0.02	A	G	0.2	http://www.ncbi.nlm.nih.gov/sites/entrez?Db=gene&Cmd=ShowDetailView&TermToSearch=339479&ordinalpos=1&itool=EntrezSystem2.PEntrez.Gene.Gene_ResultsPanel.Gene_RVDocSum	FAM5C	FAM5C	388	http://www.ncbi.nlm.nih.gov/sites/entrez?Db=gene&Cmd=ShowDetailView&TermToSearch=647132&ordinalpos=1&itool=EntrezSystem2.PEntrez.Gene.Gene_ResultsPanel.Gene_RVDocSum	LOC647132	LOC647132	865	http://www.ncbi.nlm.nih.gov/sites/entrez?Db=gene&Cmd=ShowDetailView&TermToSearch=NA&ordinalpos=1&itool=EntrezSystem2.PEntrez.Gene.Gene_ResultsPanel.Gene_RVDocSum	NA	NA	NA	3.4	1.6	0.1	1.1	0.00084	0.072	0.0027	-0.5	-0.2	-0.4	-0.2	0.34	0.71	0.55
http://www.ensembl.org/Homo_sapiens/Variation/Summary?v=rs1156627	rs1156627	rs1156627	1	0.8	0.19	0	0.01	6.4e-06	0.54	0.16	-0.02	G	A	0.2	http://www.ncbi.nlm.nih.gov/sites/entrez?Db=gene&Cmd=ShowDetailView&TermToSearch=339479&ordinalpos=1&itool=EntrezSystem2.PEntrez.Gene.Gene_ResultsPanel.Gene_RVDocSum	FAM5C	FAM5C	388	http://www.ncbi.nlm.nih.gov/sites/entrez?Db=gene&Cmd=ShowDetailView&TermToSearch=647132&ordinalpos=1&itool=EntrezSystem2.PEntrez.Gene.Gene_ResultsPanel.Gene_RVDocSum	LOC647132	LOC647132	865	http://www.ncbi.nlm.nih.gov/sites/entrez?Db=gene&Cmd=ShowDetailView&TermToSearch=NA&ordinalpos=1&itool=EntrezSystem2.PEntrez.Gene.Gene_ResultsPanel.Gene_RVDocSum	NA	NA	NA	3.4	1.6	0.1	1.1	0.00083	0.073	0.0027	-0.5	-0.2	-0.4	-0.2	0.33	0.71	0.54
http://www.ensembl.org/Homo_sapiens/Variation/Summary?v=rs1156626	rs1156626	rs1156626	1	0.8	0.19	0	0.01	6.4e-06	0.54	0.16	-0.02	T	G	0.2	http://www.ncbi.nlm.nih.gov/sites/entrez?Db=gene&Cmd=ShowDetailView&TermToSearch=339479&ordinalpos=1&itool=EntrezSystem2.PEntrez.Gene.Gene_ResultsPanel.Gene_RVDocSum	FAM5C	FAM5C	388	http://www.ncbi.nlm.nih.gov/sites/entrez?Db=gene&Cmd=ShowDetailView&TermToSearch=647132&ordinalpos=1&itool=EntrezSystem2.PEntrez.Gene.Gene_ResultsPanel.Gene_RVDocSum	LOC647132	LOC647132	865	http://www.ncbi.nlm.nih.gov/sites/entrez?Db=gene&Cmd=ShowDetailView&TermToSearch=NA&ordinalpos=1&itool=EntrezSystem2.PEntrez.Gene.Gene_ResultsPanel.Gene_RVDocSum	NA	NA	NA	3.4	1.6	0.1	1.1	0.00084	0.074	0.0027	-0.5	-0.2	-0.4	-0.2	0.33	0.72	0.54
http://www.ensembl.org/Homo_sapiens/Variation/Summary?v=rs1156625	rs1156625	rs1156625	1	0.8	0.19	0	0.01	6.3e-06	0.53	0.16	-0.02	T	C	0.2	http://www.ncbi.nlm.nih.gov/sites/entrez?Db=gene&Cmd=ShowDetailView&TermToSearch=339479&ordinalpos=1&itool=EntrezSystem2.PEntrez.Gene.Gene_ResultsPanel.Gene_RVDocSum	FAM5C	FAM5C	389	http://www.ncbi.nlm.nih.gov/sites/entrez?Db=gene&Cmd=ShowDetailView&TermToSearch=647132&ordinalpos=1&itool=EntrezSystem2.PEntrez.Gene.Gene_ResultsPanel.Gene_RVDocSum	LOC647132	LOC647132	866	http://www.ncbi.nlm.nih.gov/sites/entrez?Db=gene&Cmd=ShowDetailView&TermToSearch=NA&ordinalpos=1&itool=EntrezSystem2.PEntrez.Gene.Gene_ResultsPanel.Gene_RVDocSum	NA	NA	NA	3.4	1.6	0.1	1.1	0.00084	0.074	0.0027	-0.5	-0.2	-0.4	-0.2	0.33	0.71	0.53
http://www.ensembl.org/Homo_sapiens/Variation/Summary?v=rs1370880	rs1370880	rs1370880	1	0.72	0.27	0	0.01	4.2e-06	0.39	0.15	-0.03	G	A	0.18	http://www.ncbi.nlm.nih.gov/sites/entrez?Db=gene&Cmd=ShowDetailView&TermToSearch=339479&ordinalpos=1&itool=EntrezSystem2.PEntrez.Gene.Gene_ResultsPanel.Gene_RVDocSum	FAM5C	FAM5C	390	http://www.ncbi.nlm.nih.gov/sites/entrez?Db=gene&Cmd=ShowDetailView&TermToSearch=647132&ordinalpos=1&itool=EntrezSystem2.PEntrez.Gene.Gene_ResultsPanel.Gene_RVDocSum	LOC647132	LOC647132	867	http://www.ncbi.nlm.nih.gov/sites/entrez?Db=gene&Cmd=ShowDetailView&TermToSearch=NA&ordinalpos=1&itool=EntrezSystem2.PEntrez.Gene.Gene_ResultsPanel.Gene_RVDocSum	NA	NA	NA	3.6	1.7	0.1	1.2	0.00062	0.08	0.0025	-0.4	-0.2	-0.4	-0.2	0.23	0.72	0.51
http://www.ensembl.org/Homo_sapiens/Variation/Summary?v=rs1370879	rs1370879	rs1370879	1	0.71	0.28	0	0.01	4e-06	0.39	0.15	-0.03	G	A	0.18	http://www.ncbi.nlm.nih.gov/sites/entrez?Db=gene&Cmd=ShowDetailView&TermToSearch=339479&ordinalpos=1&itool=EntrezSystem2.PEntrez.Gene.Gene_ResultsPanel.Gene_RVDocSum	FAM5C	FAM5C	390	http://www.ncbi.nlm.nih.gov/sites/entrez?Db=gene&Cmd=ShowDetailView&TermToSearch=647132&ordinalpos=1&itool=EntrezSystem2.PEntrez.Gene.Gene_ResultsPanel.Gene_RVDocSum	LOC647132	LOC647132	867	http://www.ncbi.nlm.nih.gov/sites/entrez?Db=gene&Cmd=ShowDetailView&TermToSearch=NA&ordinalpos=1&itool=EntrezSystem2.PEntrez.Gene.Gene_ResultsPanel.Gene_RVDocSum	NA	NA	NA	3.6	1.7	0.1	1.2	0.0006	0.081	0.0025	-0.4	-0.2	-0.4	-0.2	0.22	0.72	0.51
http://www.ensembl.org/Homo_sapiens/Variation/Summary?v=rs1170703	rs1170703	rs1170703	1	0.71	0.28	0	0.01	4.1e-06	0.4	0.16	-0.03	T	C	0.17	http://www.ncbi.nlm.nih.gov/sites/entrez?Db=gene&Cmd=ShowDetailView&TermToSearch=339479&ordinalpos=1&itool=EntrezSystem2.PEntrez.Gene.Gene_ResultsPanel.Gene_RVDocSum	FAM5C	FAM5C	391	http://www.ncbi.nlm.nih.gov/sites/entrez?Db=gene&Cmd=ShowDetailView&TermToSearch=647132&ordinalpos=1&itool=EntrezSystem2.PEntrez.Gene.Gene_ResultsPanel.Gene_RVDocSum	LOC647132	LOC647132	868	http://www.ncbi.nlm.nih.gov/sites/entrez?Db=gene&Cmd=ShowDetailView&TermToSearch=NA&ordinalpos=1&itool=EntrezSystem2.PEntrez.Gene.Gene_ResultsPanel.Gene_RVDocSum	NA	NA	NA	3.6	1.7	0.1	1.2	0.00058	0.097	0.0018	-0.4	-0.2	-0.4	-0.2	0.25	0.73	0.51
http://www.ensembl.org/Homo_sapiens/Variation/Summary?v=rs2053302	rs2053302	rs2053302	1	0.69	0.3	0	0.01	3.7e-06	0.36	0.15	-0.03	T	C	0.18	http://www.ncbi.nlm.nih.gov/sites/entrez?Db=gene&Cmd=ShowDetailView&TermToSearch=339479&ordinalpos=1&itool=EntrezSystem2.PEntrez.Gene.Gene_ResultsPanel.Gene_RVDocSum	FAM5C	FAM5C	395	http://www.ncbi.nlm.nih.gov/sites/entrez?Db=gene&Cmd=ShowDetailView&TermToSearch=647132&ordinalpos=1&itool=EntrezSystem2.PEntrez.Gene.Gene_ResultsPanel.Gene_RVDocSum	LOC647132	LOC647132	872	http://www.ncbi.nlm.nih.gov/sites/entrez?Db=gene&Cmd=ShowDetailView&TermToSearch=NA&ordinalpos=1&itool=EntrezSystem2.PEntrez.Gene.Gene_ResultsPanel.Gene_RVDocSum	NA	NA	NA	3.7	1.7	0.1	1.3	0.00065	0.086	0.0018	-0.4	-0.2	-0.4	-0.2	0.23	0.74	0.49
http://www.ensembl.org/Homo_sapiens/Variation/Summary?v=rs2118652	rs2118652	rs2118652	1	0.72	0.27	0	0.01	4.4e-06	0.35	0.16	-0.03	T	C	0.16	http://www.ncbi.nlm.nih.gov/sites/entrez?Db=gene&Cmd=ShowDetailView&TermToSearch=339479&ordinalpos=1&itool=EntrezSystem2.PEntrez.Gene.Gene_ResultsPanel.Gene_RVDocSum	FAM5C	FAM5C	395	http://www.ncbi.nlm.nih.gov/sites/entrez?Db=gene&Cmd=ShowDetailView&TermToSearch=647132&ordinalpos=1&itool=EntrezSystem2.PEntrez.Gene.Gene_ResultsPanel.Gene_RVDocSum	LOC647132	LOC647132	872	http://www.ncbi.nlm.nih.gov/sites/entrez?Db=gene&Cmd=ShowDetailView&TermToSearch=NA&ordinalpos=1&itool=EntrezSystem2.PEntrez.Gene.Gene_ResultsPanel.Gene_RVDocSum	NA	NA	NA	3.6	1.6	0.1	1.2	0.00076	0.086	0.0019	-0.4	-0.2	-0.4	-0.2	0.21	0.74	0.48
http://www.ensembl.org/Homo_sapiens/Variation/Summary?v=rs6684247	rs6684247	rs6684247	1	0.7	0.29	0	0.01	3.9e-06	0.35	0.15	-0.03	G	A	0.18	http://www.ncbi.nlm.nih.gov/sites/entrez?Db=gene&Cmd=ShowDetailView&TermToSearch=339479&ordinalpos=1&itool=EntrezSystem2.PEntrez.Gene.Gene_ResultsPanel.Gene_RVDocSum	FAM5C	FAM5C	401	http://www.ncbi.nlm.nih.gov/sites/entrez?Db=gene&Cmd=ShowDetailView&TermToSearch=647132&ordinalpos=1&itool=EntrezSystem2.PEntrez.Gene.Gene_ResultsPanel.Gene_RVDocSum	LOC647132	LOC647132	878	http://www.ncbi.nlm.nih.gov/sites/entrez?Db=gene&Cmd=ShowDetailView&TermToSearch=NA&ordinalpos=1&itool=EntrezSystem2.PEntrez.Gene.Gene_ResultsPanel.Gene_RVDocSum	NA	NA	NA	3.7	1.7	0.1	1.2	0.00066	0.085	0.0019	-0.4	-0.2	-0.4	-0.2	0.23	0.75	0.48
http://www.ensembl.org/Homo_sapiens/Variation/Summary?v=rs10800986	rs10800986	rs10800986	1	0.69	0.29	0	0.01	3.9e-06	0.35	0.15	-0.03	T	C	0.18	http://www.ncbi.nlm.nih.gov/sites/entrez?Db=gene&Cmd=ShowDetailView&TermToSearch=339479&ordinalpos=1&itool=EntrezSystem2.PEntrez.Gene.Gene_ResultsPanel.Gene_RVDocSum	FAM5C	FAM5C	402	http://www.ncbi.nlm.nih.gov/sites/entrez?Db=gene&Cmd=ShowDetailView&TermToSearch=647132&ordinalpos=1&itool=EntrezSystem2.PEntrez.Gene.Gene_ResultsPanel.Gene_RVDocSum	LOC647132	LOC647132	879	http://www.ncbi.nlm.nih.gov/sites/entrez?Db=gene&Cmd=ShowDetailView&TermToSearch=NA&ordinalpos=1&itool=EntrezSystem2.PEntrez.Gene.Gene_ResultsPanel.Gene_RVDocSum	NA	NA	NA	3.7	1.7	0.1	1.3	0.00067	0.088	0.0018	-0.4	-0.2	-0.4	-0.2	0.23	0.75	0.49
http://www.ensembl.org/Homo_sapiens/Variation/Summary?v=rs1025717	rs1025717	rs1025717	1	0.75	0.24	0	0.01	5.6e-06	0.31	0.14	-0.03	G	T	0.18	http://www.ncbi.nlm.nih.gov/sites/entrez?Db=gene&Cmd=ShowDetailView&TermToSearch=339479&ordinalpos=1&itool=EntrezSystem2.PEntrez.Gene.Gene_ResultsPanel.Gene_RVDocSum	FAM5C	FAM5C	405	http://www.ncbi.nlm.nih.gov/sites/entrez?Db=gene&Cmd=ShowDetailView&TermToSearch=647132&ordinalpos=1&itool=EntrezSystem2.PEntrez.Gene.Gene_ResultsPanel.Gene_RVDocSum	LOC647132	LOC647132	882	http://www.ncbi.nlm.nih.gov/sites/entrez?Db=gene&Cmd=ShowDetailView&TermToSearch=NA&ordinalpos=1&itool=EntrezSystem2.PEntrez.Gene.Gene_ResultsPanel.Gene_RVDocSum	NA	NA	NA	3.6	1.6	0	1.3	0.00084	0.1	0.0017	-0.4	-0.2	-0.4	-0.2	0.21	0.77	0.45
http://www.ensembl.org/Homo_sapiens/Variation/Summary?v=rs7535458	rs7535458	rs7535458	1	0.77	0.22	0	0.01	6.1e-06	0.31	0.17	-0.04	C	T	0.17	http://www.ncbi.nlm.nih.gov/sites/entrez?Db=gene&Cmd=ShowDetailView&TermToSearch=339479&ordinalpos=1&itool=EntrezSystem2.PEntrez.Gene.Gene_ResultsPanel.Gene_RVDocSum	FAM5C	FAM5C	407	http://www.ncbi.nlm.nih.gov/sites/entrez?Db=gene&Cmd=ShowDetailView&TermToSearch=647132&ordinalpos=1&itool=EntrezSystem2.PEntrez.Gene.Gene_ResultsPanel.Gene_RVDocSum	LOC647132	LOC647132	884	http://www.ncbi.nlm.nih.gov/sites/entrez?Db=gene&Cmd=ShowDetailView&TermToSearch=NA&ordinalpos=1&itool=EntrezSystem2.PEntrez.Gene.Gene_ResultsPanel.Gene_RVDocSum	NA	NA	NA	3.5	1.6	0.1	1.2	0.00092	0.1	0.0016	-0.4	-0.2	-0.3	-0.2	0.21	0.77	0.45
http://www.ensembl.org/Homo_sapiens/Variation/Summary?v=rs1030922	rs1030922	rs1030922	1	0.77	0.22	0	0.01	6.7e-06	0.29	0.14	-0.03	G	A	0.17	http://www.ncbi.nlm.nih.gov/sites/entrez?Db=gene&Cmd=ShowDetailView&TermToSearch=339479&ordinalpos=1&itool=EntrezSystem2.PEntrez.Gene.Gene_ResultsPanel.Gene_RVDocSum	FAM5C	FAM5C	408	http://www.ncbi.nlm.nih.gov/sites/entrez?Db=gene&Cmd=ShowDetailView&TermToSearch=647132&ordinalpos=1&itool=EntrezSystem2.PEntrez.Gene.Gene_ResultsPanel.Gene_RVDocSum	LOC647132	LOC647132	885	http://www.ncbi.nlm.nih.gov/sites/entrez?Db=gene&Cmd=ShowDetailView&TermToSearch=NA&ordinalpos=1&itool=EntrezSystem2.PEntrez.Gene.Gene_ResultsPanel.Gene_RVDocSum	NA	NA	NA	3.5	1.6	0	1.3	0.00088	0.11	0.0016	-0.4	-0.2	-0.4	-0.2	0.2	0.8	0.44
http://www.ensembl.org/Homo_sapiens/Variation/Summary?v=rs1170712	rs1170712	rs1170712	1	0.78	0.21	0	0.01	8e-06	0.33	0.15	-0.03	A	T	0.16	http://www.ncbi.nlm.nih.gov/sites/entrez?Db=gene&Cmd=ShowDetailView&TermToSearch=339479&ordinalpos=1&itool=EntrezSystem2.PEntrez.Gene.Gene_ResultsPanel.Gene_RVDocSum	FAM5C	FAM5C	409	http://www.ncbi.nlm.nih.gov/sites/entrez?Db=gene&Cmd=ShowDetailView&TermToSearch=647132&ordinalpos=1&itool=EntrezSystem2.PEntrez.Gene.Gene_ResultsPanel.Gene_RVDocSum	LOC647132	LOC647132	886	http://www.ncbi.nlm.nih.gov/sites/entrez?Db=gene&Cmd=ShowDetailView&TermToSearch=NA&ordinalpos=1&itool=EntrezSystem2.PEntrez.Gene.Gene_ResultsPanel.Gene_RVDocSum	NA	NA	NA	3.5	1.6	0	1.4	0.00094	0.13	0.0014	-0.4	-0.2	-0.4	-0.2	0.23	0.81	0.49
http://www.ensembl.org/Homo_sapiens/Variation/Summary?v=rs10800989	rs10800989	rs10800989	1	0.77	0.22	0	0.01	7e-06	0.29	0.14	-0.03	C	T	0.17	http://www.ncbi.nlm.nih.gov/sites/entrez?Db=gene&Cmd=ShowDetailView&TermToSearch=339479&ordinalpos=1&itool=EntrezSystem2.PEntrez.Gene.Gene_ResultsPanel.Gene_RVDocSum	FAM5C	FAM5C	409	http://www.ncbi.nlm.nih.gov/sites/entrez?Db=gene&Cmd=ShowDetailView&TermToSearch=647132&ordinalpos=1&itool=EntrezSystem2.PEntrez.Gene.Gene_ResultsPanel.Gene_RVDocSum	LOC647132	LOC647132	886	http://www.ncbi.nlm.nih.gov/sites/entrez?Db=gene&Cmd=ShowDetailView&TermToSearch=NA&ordinalpos=1&itool=EntrezSystem2.PEntrez.Gene.Gene_ResultsPanel.Gene_RVDocSum	NA	NA	NA	3.5	1.6	0	1.3	0.00091	0.11	0.0016	-0.4	-0.2	-0.4	-0.2	0.21	0.81	0.45
http://www.ensembl.org/Homo_sapiens/Variation/Summary?v=rs6686343	rs6686343	rs6686343	1	0.77	0.22	0	0.01	7.1e-06	0.29	0.14	-0.03	A	C	0.17	http://www.ncbi.nlm.nih.gov/sites/entrez?Db=gene&Cmd=ShowDetailView&TermToSearch=339479&ordinalpos=1&itool=EntrezSystem2.PEntrez.Gene.Gene_ResultsPanel.Gene_RVDocSum	FAM5C	FAM5C	410	http://www.ncbi.nlm.nih.gov/sites/entrez?Db=gene&Cmd=ShowDetailView&TermToSearch=647132&ordinalpos=1&itool=EntrezSystem2.PEntrez.Gene.Gene_ResultsPanel.Gene_RVDocSum	LOC647132	LOC647132	887	http://www.ncbi.nlm.nih.gov/sites/entrez?Db=gene&Cmd=ShowDetailView&TermToSearch=NA&ordinalpos=1&itool=EntrezSystem2.PEntrez.Gene.Gene_ResultsPanel.Gene_RVDocSum	NA	NA	NA	3.5	1.6	0	1.3	0.0009	0.12	0.0017	-0.4	-0.2	-0.4	-0.2	0.21	0.81	0.45
http://www.ensembl.org/Homo_sapiens/Variation/Summary?v=rs10920829	rs10920829	rs10920829	1	0.78	0.21	0	0.01	7.5e-06	0.29	0.14	-0.03	C	A	0.17	http://www.ncbi.nlm.nih.gov/sites/entrez?Db=gene&Cmd=ShowDetailView&TermToSearch=339479&ordinalpos=1&itool=EntrezSystem2.PEntrez.Gene.Gene_ResultsPanel.Gene_RVDocSum	FAM5C	FAM5C	411	http://www.ncbi.nlm.nih.gov/sites/entrez?Db=gene&Cmd=ShowDetailView&TermToSearch=647132&ordinalpos=1&itool=EntrezSystem2.PEntrez.Gene.Gene_ResultsPanel.Gene_RVDocSum	LOC647132	LOC647132	888	http://www.ncbi.nlm.nih.gov/sites/entrez?Db=gene&Cmd=ShowDetailView&TermToSearch=NA&ordinalpos=1&itool=EntrezSystem2.PEntrez.Gene.Gene_ResultsPanel.Gene_RVDocSum	NA	NA	NA	3.5	1.6	0	1.3	0.00091	0.12	0.0017	-0.4	-0.2	-0.4	-0.2	0.21	0.81	0.45
http://www.ensembl.org/Homo_sapiens/Variation/Summary?v=rs1936993	rs1936993	rs1936993	1	0.86	0.14	0	0.01	1.8e-05	0.3	0.14	-0.03	A	G	0.16	http://www.ncbi.nlm.nih.gov/sites/entrez?Db=gene&Cmd=ShowDetailView&TermToSearch=339479&ordinalpos=1&itool=EntrezSystem2.PEntrez.Gene.Gene_ResultsPanel.Gene_RVDocSum	FAM5C	FAM5C	414	http://www.ncbi.nlm.nih.gov/sites/entrez?Db=gene&Cmd=ShowDetailView&TermToSearch=647132&ordinalpos=1&itool=EntrezSystem2.PEntrez.Gene.Gene_ResultsPanel.Gene_RVDocSum	LOC647132	LOC647132	891	http://www.ncbi.nlm.nih.gov/sites/entrez?Db=gene&Cmd=ShowDetailView&TermToSearch=NA&ordinalpos=1&itool=EntrezSystem2.PEntrez.Gene.Gene_ResultsPanel.Gene_RVDocSum	NA	NA	NA	3.2	1.6	-0.1	1.2	0.00097	0.15	0.004	-0.4	-0.2	-0.4	-0.2	0.23	0.89	0.44
http://www.ensembl.org/Homo_sapiens/Variation/Summary?v=rs6699971	rs6699971	rs6699971	1	0.84	0.15	0	0.01	1.2e-05	0.28	0.13	-0.03	A	G	0.17	http://www.ncbi.nlm.nih.gov/sites/entrez?Db=gene&Cmd=ShowDetailView&TermToSearch=339479&ordinalpos=1&itool=EntrezSystem2.PEntrez.Gene.Gene_ResultsPanel.Gene_RVDocSum	FAM5C	FAM5C	414	http://www.ncbi.nlm.nih.gov/sites/entrez?Db=gene&Cmd=ShowDetailView&TermToSearch=647132&ordinalpos=1&itool=EntrezSystem2.PEntrez.Gene.Gene_ResultsPanel.Gene_RVDocSum	LOC647132	LOC647132	891	http://www.ncbi.nlm.nih.gov/sites/entrez?Db=gene&Cmd=ShowDetailView&TermToSearch=NA&ordinalpos=1&itool=EntrezSystem2.PEntrez.Gene.Gene_ResultsPanel.Gene_RVDocSum	NA	NA	NA	3.3	1.4	0	1.4	0.0014	0.12	0.0016	-0.4	-0.2	-0.4	-0.2	0.21	0.84	0.45
http://www.ensembl.org/Homo_sapiens/Variation/Summary?v=rs10920831	rs10920831	rs10920831	1	0.77	0.22	0	0.01	8.2e-06	0.23	0.14	-0.04	C	T	0.17	http://www.ncbi.nlm.nih.gov/sites/entrez?Db=gene&Cmd=ShowDetailView&TermToSearch=339479&ordinalpos=1&itool=EntrezSystem2.PEntrez.Gene.Gene_ResultsPanel.Gene_RVDocSum	FAM5C	FAM5C	415	http://www.ncbi.nlm.nih.gov/sites/entrez?Db=gene&Cmd=ShowDetailView&TermToSearch=647132&ordinalpos=1&itool=EntrezSystem2.PEntrez.Gene.Gene_ResultsPanel.Gene_RVDocSum	LOC647132	LOC647132	892	http://www.ncbi.nlm.nih.gov/sites/entrez?Db=gene&Cmd=ShowDetailView&TermToSearch=NA&ordinalpos=1&itool=EntrezSystem2.PEntrez.Gene.Gene_ResultsPanel.Gene_RVDocSum	NA	NA	NA	3.5	1.6	0	1.4	0.001	0.12	0.0016	-0.4	-0.1	-0.4	-0.2	0.16	0.84	0.46
http://www.ensembl.org/Homo_sapiens/Variation/Summary?v=rs12039354	rs12039354	rs12039354	1	0.79	0.21	0	0.01	8.6e-06	0.27	0.14	-0.03	G	A	0.17	http://www.ncbi.nlm.nih.gov/sites/entrez?Db=gene&Cmd=ShowDetailView&TermToSearch=339479&ordinalpos=1&itool=EntrezSystem2.PEntrez.Gene.Gene_ResultsPanel.Gene_RVDocSum	FAM5C	FAM5C	416	http://www.ncbi.nlm.nih.gov/sites/entrez?Db=gene&Cmd=ShowDetailView&TermToSearch=647132&ordinalpos=1&itool=EntrezSystem2.PEntrez.Gene.Gene_ResultsPanel.Gene_RVDocSum	LOC647132	LOC647132	893	http://www.ncbi.nlm.nih.gov/sites/entrez?Db=gene&Cmd=ShowDetailView&TermToSearch=NA&ordinalpos=1&itool=EntrezSystem2.PEntrez.Gene.Gene_ResultsPanel.Gene_RVDocSum	NA	NA	NA	3.5	1.6	0	1.4	0.001	0.12	0.0015	-0.4	-0.2	-0.4	-0.2	0.19	0.84	0.46
http://www.ensembl.org/Homo_sapiens/Variation/Summary?v=rs1936980	rs1936980	rs1936980	1	0.9	0.09	0	0	2.5e-05	0.24	0.16	-0.04	T	C	0.16	http://www.ncbi.nlm.nih.gov/sites/entrez?Db=gene&Cmd=ShowDetailView&TermToSearch=339479&ordinalpos=1&itool=EntrezSystem2.PEntrez.Gene.Gene_ResultsPanel.Gene_RVDocSum	FAM5C	FAM5C	429	http://www.ncbi.nlm.nih.gov/sites/entrez?Db=gene&Cmd=ShowDetailView&TermToSearch=647132&ordinalpos=1&itool=EntrezSystem2.PEntrez.Gene.Gene_ResultsPanel.Gene_RVDocSum	LOC647132	LOC647132	906	http://www.ncbi.nlm.nih.gov/sites/entrez?Db=gene&Cmd=ShowDetailView&TermToSearch=NA&ordinalpos=1&itool=EntrezSystem2.PEntrez.Gene.Gene_ResultsPanel.Gene_RVDocSum	NA	NA	NA	3.1	1.7	-0.1	1.2	0.00061	0.14	0.0039	-0.3	0.1	-0.4	-0.2	0.096	0.9	0.44
http://www.ensembl.org/Homo_sapiens/Variation/Summary?v=rs4845175	rs4845175	rs4845175	1	0.89	0.1	0	0.01	2e-05	0.26	0.17	-0.04	T	C	0.16	http://www.ncbi.nlm.nih.gov/sites/entrez?Db=gene&Cmd=ShowDetailView&TermToSearch=339479&ordinalpos=1&itool=EntrezSystem2.PEntrez.Gene.Gene_ResultsPanel.Gene_RVDocSum	FAM5C	FAM5C	433	http://www.ncbi.nlm.nih.gov/sites/entrez?Db=gene&Cmd=ShowDetailView&TermToSearch=647132&ordinalpos=1&itool=EntrezSystem2.PEntrez.Gene.Gene_ResultsPanel.Gene_RVDocSum	LOC647132	LOC647132	910	http://www.ncbi.nlm.nih.gov/sites/entrez?Db=gene&Cmd=ShowDetailView&TermToSearch=NA&ordinalpos=1&itool=EntrezSystem2.PEntrez.Gene.Gene_ResultsPanel.Gene_RVDocSum	NA	NA	NA	3.1	1.6	0	1.2	0.00066	0.13	0.0031	-0.3	0.1	-0.4	-0.2	0.095	0.85	0.45
http://www.ensembl.org/Homo_sapiens/Variation/Summary?v=rs12145615	rs12145615	rs12145615	1	0.93	0.07	0	0	2.9e-05	0.28	0.19	-0.05	A	T	0.16	http://www.ncbi.nlm.nih.gov/sites/entrez?Db=gene&Cmd=ShowDetailView&TermToSearch=339479&ordinalpos=1&itool=EntrezSystem2.PEntrez.Gene.Gene_ResultsPanel.Gene_RVDocSum	FAM5C	FAM5C	444	http://www.ncbi.nlm.nih.gov/sites/entrez?Db=gene&Cmd=ShowDetailView&TermToSearch=647132&ordinalpos=1&itool=EntrezSystem2.PEntrez.Gene.Gene_ResultsPanel.Gene_RVDocSum	LOC647132	LOC647132	921	http://www.ncbi.nlm.nih.gov/sites/entrez?Db=gene&Cmd=ShowDetailView&TermToSearch=NA&ordinalpos=1&itool=EntrezSystem2.PEntrez.Gene.Gene_ResultsPanel.Gene_RVDocSum	NA	NA	NA	2.9	1.5	0	0.9	0.00094	0.13	0.0058	-0.3	0.2	-0.3	-0.2	0.069	0.68	0.51
http://www.ensembl.org/Homo_sapiens/Variation/Summary?v=rs10920836	rs10920836	rs10920836	1	0.93	0.07	0	0	3.1e-05	0.29	0.19	-0.05	C	G	0.16	http://www.ncbi.nlm.nih.gov/sites/entrez?Db=gene&Cmd=ShowDetailView&TermToSearch=339479&ordinalpos=1&itool=EntrezSystem2.PEntrez.Gene.Gene_ResultsPanel.Gene_RVDocSum	FAM5C	FAM5C	445	http://www.ncbi.nlm.nih.gov/sites/entrez?Db=gene&Cmd=ShowDetailView&TermToSearch=647132&ordinalpos=1&itool=EntrezSystem2.PEntrez.Gene.Gene_ResultsPanel.Gene_RVDocSum	LOC647132	LOC647132	922	http://www.ncbi.nlm.nih.gov/sites/entrez?Db=gene&Cmd=ShowDetailView&TermToSearch=NA&ordinalpos=1&itool=EntrezSystem2.PEntrez.Gene.Gene_ResultsPanel.Gene_RVDocSum	NA	NA	NA	2.9	1.5	0	1	0.00094	0.13	0.0057	-0.3	0.2	-0.3	-0.2	0.069	0.68	0.51
http://www.ensembl.org/Homo_sapiens/Variation/Summary?v=rs10920837	rs10920837	rs10920837	1	0.92	0.07	0	0	2.7e-05	0.31	0.18	-0.04	G	C	0.16	http://www.ncbi.nlm.nih.gov/sites/entrez?Db=gene&Cmd=ShowDetailView&TermToSearch=339479&ordinalpos=1&itool=EntrezSystem2.PEntrez.Gene.Gene_ResultsPanel.Gene_RVDocSum	FAM5C	FAM5C	446	http://www.ncbi.nlm.nih.gov/sites/entrez?Db=gene&Cmd=ShowDetailView&TermToSearch=647132&ordinalpos=1&itool=EntrezSystem2.PEntrez.Gene.Gene_ResultsPanel.Gene_RVDocSum	LOC647132	LOC647132	924	http://www.ncbi.nlm.nih.gov/sites/entrez?Db=gene&Cmd=ShowDetailView&TermToSearch=NA&ordinalpos=1&itool=EntrezSystem2.PEntrez.Gene.Gene_ResultsPanel.Gene_RVDocSum	NA	NA	NA	3	1.6	0	1	0.0007	0.13	0.0058	-0.3	0.1	-0.3	-0.2	0.081	0.69	0.51
http://www.ensembl.org/Homo_sapiens/Variation/Summary?v=rs4845257	rs4845257	rs4845257	1	0.92	0.07	0	0	2.6e-05	0.31	0.17	-0.04	T	G	0.2	http://www.ncbi.nlm.nih.gov/sites/entrez?Db=gene&Cmd=ShowDetailView&TermToSearch=339479&ordinalpos=1&itool=EntrezSystem2.PEntrez.Gene.Gene_ResultsPanel.Gene_RVDocSum	FAM5C	FAM5C	447	http://www.ncbi.nlm.nih.gov/sites/entrez?Db=gene&Cmd=ShowDetailView&TermToSearch=647132&ordinalpos=1&itool=EntrezSystem2.PEntrez.Gene.Gene_ResultsPanel.Gene_RVDocSum	LOC647132	LOC647132	924	http://www.ncbi.nlm.nih.gov/sites/entrez?Db=gene&Cmd=ShowDetailView&TermToSearch=NA&ordinalpos=1&itool=EntrezSystem2.PEntrez.Gene.Gene_ResultsPanel.Gene_RVDocSum	NA	NA	NA	2.9	1.6	0	0.9	0.00062	0.12	0.0083	-0.3	0.1	-0.3	-0.2	0.1	0.71	0.47
http://www.ensembl.org/Homo_sapiens/Variation/Summary?v=rs12025636	rs12025636	rs12025636	1	0.87	0.13	0	0.01	1.4e-05	0.27	0.19	-0.05	A	G	0.19	http://www.ncbi.nlm.nih.gov/sites/entrez?Db=gene&Cmd=ShowDetailView&TermToSearch=339479&ordinalpos=1&itool=EntrezSystem2.PEntrez.Gene.Gene_ResultsPanel.Gene_RVDocSum	FAM5C	FAM5C	454	http://www.ncbi.nlm.nih.gov/sites/entrez?Db=gene&Cmd=ShowDetailView&TermToSearch=647132&ordinalpos=1&itool=EntrezSystem2.PEntrez.Gene.Gene_ResultsPanel.Gene_RVDocSum	LOC647132	LOC647132	931	http://www.ncbi.nlm.nih.gov/sites/entrez?Db=gene&Cmd=ShowDetailView&TermToSearch=NA&ordinalpos=1&itool=EntrezSystem2.PEntrez.Gene.Gene_ResultsPanel.Gene_RVDocSum	NA	NA	NA	3.2	1.5	0	1	0.001	0.11	0.0037	-0.3	0.1	-0.3	-0.2	0.087	0.62	0.49
http://www.ensembl.org/Homo_sapiens/Variation/Summary?v=rs12567544	rs12567544	rs12567544	1	0.8	0.19	0	0.01	6.7e-06	0.21	0.16	-0.04	C	A	0.25	http://www.ncbi.nlm.nih.gov/sites/entrez?Db=gene&Cmd=ShowDetailView&TermToSearch=339479&ordinalpos=1&itool=EntrezSystem2.PEntrez.Gene.Gene_ResultsPanel.Gene_RVDocSum	FAM5C	FAM5C	467	http://www.ncbi.nlm.nih.gov/sites/entrez?Db=gene&Cmd=ShowDetailView&TermToSearch=647132&ordinalpos=1&itool=EntrezSystem2.PEntrez.Gene.Gene_ResultsPanel.Gene_RVDocSum	LOC647132	LOC647132	944	http://www.ncbi.nlm.nih.gov/sites/entrez?Db=gene&Cmd=ShowDetailView&TermToSearch=NA&ordinalpos=1&itool=EntrezSystem2.PEntrez.Gene.Gene_ResultsPanel.Gene_RVDocSum	NA	NA	NA	3.4	1.8	0	1.2	0.00049	0.16	0.0019	-0.3	0.2	-0.3	-0.2	0.062	0.67	0.61
http://www.ensembl.org/Homo_sapiens/Variation/Summary?v=rs7549733	rs7549733	rs7549733	1	0.79	0.2	0	0.01	7e-06	0.22	0.17	-0.05	G	A	0.21	http://www.ncbi.nlm.nih.gov/sites/entrez?Db=gene&Cmd=ShowDetailView&TermToSearch=339479&ordinalpos=1&itool=EntrezSystem2.PEntrez.Gene.Gene_ResultsPanel.Gene_RVDocSum	FAM5C	FAM5C	470	http://www.ncbi.nlm.nih.gov/sites/entrez?Db=gene&Cmd=ShowDetailView&TermToSearch=647132&ordinalpos=1&itool=EntrezSystem2.PEntrez.Gene.Gene_ResultsPanel.Gene_RVDocSum	LOC647132	LOC647132	947	http://www.ncbi.nlm.nih.gov/sites/entrez?Db=gene&Cmd=ShowDetailView&TermToSearch=NA&ordinalpos=1&itool=EntrezSystem2.PEntrez.Gene.Gene_ResultsPanel.Gene_RVDocSum	NA	NA	NA	3.5	1.7	0	1.3	0.00068	0.16	0.0013	-0.3	0.2	-0.3	-0.2	0.054	0.64	0.72
http://www.ensembl.org/Homo_sapiens/Variation/Summary?v=rs10753960	rs10753960	rs10753960	1	0.79	0.2	0	0.01	7.1e-06	0.22	0.17	-0.05	C	T	0.21	http://www.ncbi.nlm.nih.gov/sites/entrez?Db=gene&Cmd=ShowDetailView&TermToSearch=339479&ordinalpos=1&itool=EntrezSystem2.PEntrez.Gene.Gene_ResultsPanel.Gene_RVDocSum	FAM5C	FAM5C	472	http://www.ncbi.nlm.nih.gov/sites/entrez?Db=gene&Cmd=ShowDetailView&TermToSearch=647132&ordinalpos=1&itool=EntrezSystem2.PEntrez.Gene.Gene_ResultsPanel.Gene_RVDocSum	LOC647132	LOC647132	949	http://www.ncbi.nlm.nih.gov/sites/entrez?Db=gene&Cmd=ShowDetailView&TermToSearch=NA&ordinalpos=1&itool=EntrezSystem2.PEntrez.Gene.Gene_ResultsPanel.Gene_RVDocSum	NA	NA	NA	3.5	1.7	0	1.3	0.00069	0.15	0.0014	-0.3	0.2	-0.3	-0.2	0.054	0.64	0.72
http://www.ensembl.org/Homo_sapiens/Variation/Summary?v=rs1431137	rs1431137	rs1431137	1	0.78	0.21	0	0.01	6.8e-06	0.21	0.17	-0.05	T	C	0.2	http://www.ncbi.nlm.nih.gov/sites/entrez?Db=gene&Cmd=ShowDetailView&TermToSearch=339479&ordinalpos=1&itool=EntrezSystem2.PEntrez.Gene.Gene_ResultsPanel.Gene_RVDocSum	FAM5C	FAM5C	477	http://www.ncbi.nlm.nih.gov/sites/entrez?Db=gene&Cmd=ShowDetailView&TermToSearch=647132&ordinalpos=1&itool=EntrezSystem2.PEntrez.Gene.Gene_ResultsPanel.Gene_RVDocSum	LOC647132	LOC647132	954	http://www.ncbi.nlm.nih.gov/sites/entrez?Db=gene&Cmd=ShowDetailView&TermToSearch=NA&ordinalpos=1&itool=EntrezSystem2.PEntrez.Gene.Gene_ResultsPanel.Gene_RVDocSum	NA	NA	NA	3.5	1.6	0	1.4	0.00085	0.14	0.0012	-0.2	0.2	-0.3	-0.2	0.058	0.67	0.76
http://www.ensembl.org/Homo_sapiens/Variation/Summary?v=rs1924720	rs1924720	rs1924720	1	0.92	0.07	0	0	1.7e-05	0.72	0.24	-0.02	G	T	0.08	http://www.ncbi.nlm.nih.gov/sites/entrez?Db=gene&Cmd=ShowDetailView&TermToSearch=339479&ordinalpos=1&itool=EntrezSystem2.PEntrez.Gene.Gene_ResultsPanel.Gene_RVDocSum	FAM5C	FAM5C	483	http://www.ncbi.nlm.nih.gov/sites/entrez?Db=gene&Cmd=ShowDetailView&TermToSearch=647132&ordinalpos=1&itool=EntrezSystem2.PEntrez.Gene.Gene_ResultsPanel.Gene_RVDocSum	LOC647132	LOC647132	960	http://www.ncbi.nlm.nih.gov/sites/entrez?Db=gene&Cmd=ShowDetailView&TermToSearch=NA&ordinalpos=1&itool=EntrezSystem2.PEntrez.Gene.Gene_ResultsPanel.Gene_RVDocSum	NA	NA	NA	2.9	1.3	0.2	0.8	0.0009	0.068	0.0069	-0.4	0.2	-0.2	-0.2	0.069	0.59	0.7
http://www.ensembl.org/Homo_sapiens/Variation/Summary?v=rs1431141	rs1431141	rs1431141	1	0.87	0.12	0	0.01	1.3e-05	0.25	0.17	-0.05	T	C	0.19	http://www.ncbi.nlm.nih.gov/sites/entrez?Db=gene&Cmd=ShowDetailView&TermToSearch=339479&ordinalpos=1&itool=EntrezSystem2.PEntrez.Gene.Gene_ResultsPanel.Gene_RVDocSum	FAM5C	FAM5C	487	http://www.ncbi.nlm.nih.gov/sites/entrez?Db=gene&Cmd=ShowDetailView&TermToSearch=647132&ordinalpos=1&itool=EntrezSystem2.PEntrez.Gene.Gene_ResultsPanel.Gene_RVDocSum	LOC647132	LOC647132	964	http://www.ncbi.nlm.nih.gov/sites/entrez?Db=gene&Cmd=ShowDetailView&TermToSearch=NA&ordinalpos=1&itool=EntrezSystem2.PEntrez.Gene.Gene_ResultsPanel.Gene_RVDocSum	NA	NA	NA	3.2	1.6	0	1.1	0.00079	0.18	0.0029	-0.3	0.2	-0.3	-0.2	0.054	0.55	0.93
http://www.ensembl.org/Homo_sapiens/Variation/Summary?v=rs10800994	rs10800994	rs10800994	1	0.87	0.12	0	0.01	1.3e-05	0.25	0.17	-0.05	G	C	0.19	http://www.ncbi.nlm.nih.gov/sites/entrez?Db=gene&Cmd=ShowDetailView&TermToSearch=339479&ordinalpos=1&itool=EntrezSystem2.PEntrez.Gene.Gene_ResultsPanel.Gene_RVDocSum	FAM5C	FAM5C	488	http://www.ncbi.nlm.nih.gov/sites/entrez?Db=gene&Cmd=ShowDetailView&TermToSearch=647132&ordinalpos=1&itool=EntrezSystem2.PEntrez.Gene.Gene_ResultsPanel.Gene_RVDocSum	LOC647132	LOC647132	965	http://www.ncbi.nlm.nih.gov/sites/entrez?Db=gene&Cmd=ShowDetailView&TermToSearch=NA&ordinalpos=1&itool=EntrezSystem2.PEntrez.Gene.Gene_ResultsPanel.Gene_RVDocSum	NA	NA	NA	3.2	1.7	0	1	0.00076	0.18	0.003	-0.3	0.2	-0.3	-0.2	0.056	0.55	0.93
http://www.ensembl.org/Homo_sapiens/Variation/Summary?v=rs1431143	rs1431143	rs1431143	1	0.99	0.01	0	0	0.00017	0.43	0.13	-0.03	A	G	0.29	http://www.ncbi.nlm.nih.gov/sites/entrez?Db=gene&Cmd=ShowDetailView&TermToSearch=339479&ordinalpos=1&itool=EntrezSystem2.PEntrez.Gene.Gene_ResultsPanel.Gene_RVDocSum	FAM5C	FAM5C	489	http://www.ncbi.nlm.nih.gov/sites/entrez?Db=gene&Cmd=ShowDetailView&TermToSearch=647132&ordinalpos=1&itool=EntrezSystem2.PEntrez.Gene.Gene_ResultsPanel.Gene_RVDocSum	LOC647132	LOC647132	966	http://www.ncbi.nlm.nih.gov/sites/entrez?Db=gene&Cmd=ShowDetailView&TermToSearch=NA&ordinalpos=1&itool=EntrezSystem2.PEntrez.Gene.Gene_ResultsPanel.Gene_RVDocSum	NA	NA	NA	2.1	1.4	-0.1	0.2	0.0013	0.23	0.057	-0.4	0.3	-0.2	-0.2	0.058	0.33	0.86
http://www.ensembl.org/Homo_sapiens/Variation/Summary?v=rs12743155	rs12743155	rs12743155	1	0.99	0.01	0	0	0.0002	0.42	0.12	-0.03	T	C	0.29	http://www.ncbi.nlm.nih.gov/sites/entrez?Db=gene&Cmd=ShowDetailView&TermToSearch=339479&ordinalpos=1&itool=EntrezSystem2.PEntrez.Gene.Gene_ResultsPanel.Gene_RVDocSum	FAM5C	FAM5C	489	http://www.ncbi.nlm.nih.gov/sites/entrez?Db=gene&Cmd=ShowDetailView&TermToSearch=647132&ordinalpos=1&itool=EntrezSystem2.PEntrez.Gene.Gene_ResultsPanel.Gene_RVDocSum	LOC647132	LOC647132	966	http://www.ncbi.nlm.nih.gov/sites/entrez?Db=gene&Cmd=ShowDetailView&TermToSearch=NA&ordinalpos=1&itool=EntrezSystem2.PEntrez.Gene.Gene_ResultsPanel.Gene_RVDocSum	NA	NA	NA	2.1	1.3	-0.1	0.2	0.0017	0.23	0.058	-0.4	0.2	-0.2	-0.2	0.062	0.33	0.87
http://www.ensembl.org/Homo_sapiens/Variation/Summary?v=rs6666860	rs6666860	rs6666860	1	0.94	0.06	0	0	3.6e-05	0.26	0.16	-0.04	C	A	0.18	http://www.ncbi.nlm.nih.gov/sites/entrez?Db=gene&Cmd=ShowDetailView&TermToSearch=339479&ordinalpos=1&itool=EntrezSystem2.PEntrez.Gene.Gene_ResultsPanel.Gene_RVDocSum	FAM5C	FAM5C	503	http://www.ncbi.nlm.nih.gov/sites/entrez?Db=gene&Cmd=ShowDetailView&TermToSearch=647132&ordinalpos=1&itool=EntrezSystem2.PEntrez.Gene.Gene_ResultsPanel.Gene_RVDocSum	LOC647132	LOC647132	980	http://www.ncbi.nlm.nih.gov/sites/entrez?Db=gene&Cmd=ShowDetailView&TermToSearch=NA&ordinalpos=1&itool=EntrezSystem2.PEntrez.Gene.Gene_ResultsPanel.Gene_RVDocSum	NA	NA	NA	2.9	1.6	-0.1	0.8	0.0011	0.19	0.0077	-0.3	0.1	-0.3	-0.2	0.082	0.62	0.81
http://www.ensembl.org/Homo_sapiens/Variation/Summary?v=rs7553214	rs7553214	rs7553214	1	0.98	0.02	0	0	0.00014	0.25	0.13	-0.04	A	T	0.18	http://www.ncbi.nlm.nih.gov/sites/entrez?Db=gene&Cmd=ShowDetailView&TermToSearch=339479&ordinalpos=1&itool=EntrezSystem2.PEntrez.Gene.Gene_ResultsPanel.Gene_RVDocSum	FAM5C	FAM5C	519	http://www.ncbi.nlm.nih.gov/sites/entrez?Db=gene&Cmd=ShowDetailView&TermToSearch=647132&ordinalpos=1&itool=EntrezSystem2.PEntrez.Gene.Gene_ResultsPanel.Gene_RVDocSum	LOC647132	LOC647132	997	http://www.ncbi.nlm.nih.gov/sites/entrez?Db=gene&Cmd=ShowDetailView&TermToSearch=NA&ordinalpos=1&itool=EntrezSystem2.PEntrez.Gene.Gene_ResultsPanel.Gene_RVDocSum	NA	NA	NA	2.4	1.4	-0.1	0.6	0.0022	0.26	0.016	-0.3	0	-0.3	-0.2	0.099	0.74	0.98
http://www.ensembl.org/Homo_sapiens/Variation/Summary?v=rs6683176	rs6683176	rs6683176	1	0.98	0.01	0	0	0.00011	0.3	0.27	-0.07	G	A	0.08	http://www.ncbi.nlm.nih.gov/sites/entrez?Db=gene&Cmd=ShowDetailView&TermToSearch=339479&ordinalpos=1&itool=EntrezSystem2.PEntrez.Gene.Gene_ResultsPanel.Gene_RVDocSum	FAM5C	FAM5C	531	http://www.ncbi.nlm.nih.gov/sites/entrez?Db=gene&Cmd=ShowDetailView&TermToSearch=NA&ordinalpos=1&itool=EntrezSystem2.PEntrez.Gene.Gene_ResultsPanel.Gene_RVDocSum	NA	NA	NA	http://www.ncbi.nlm.nih.gov/sites/entrez?Db=gene&Cmd=ShowDetailView&TermToSearch=NA&ordinalpos=1&itool=EntrezSystem2.PEntrez.Gene.Gene_ResultsPanel.Gene_RVDocSum	NA	NA	NA	2.2	1.1	0	0.4	0.0021	0.22	0.017	-0.2	0.1	-0.2	-0.1	0.11	0.73	0.98
http://www.ensembl.org/Homo_sapiens/Variation/Summary?v=rs10920865	rs10920865	rs10920865	1	0.98	0.02	0	0	0.00016	0.33	0.13	-0.03	C	T	0.17	http://www.ncbi.nlm.nih.gov/sites/entrez?Db=gene&Cmd=ShowDetailView&TermToSearch=339479&ordinalpos=1&itool=EntrezSystem2.PEntrez.Gene.Gene_ResultsPanel.Gene_RVDocSum	FAM5C	FAM5C	535	http://www.ncbi.nlm.nih.gov/sites/entrez?Db=gene&Cmd=ShowDetailView&TermToSearch=NA&ordinalpos=1&itool=EntrezSystem2.PEntrez.Gene.Gene_ResultsPanel.Gene_RVDocSum	NA	NA	NA	http://www.ncbi.nlm.nih.gov/sites/entrez?Db=gene&Cmd=ShowDetailView&TermToSearch=NA&ordinalpos=1&itool=EntrezSystem2.PEntrez.Gene.Gene_ResultsPanel.Gene_RVDocSum	NA	NA	NA	2.4	1.4	-0.1	0.6	0.0022	0.25	0.02	-0.4	0	-0.3	-0.2	0.13	0.74	0.98
http://www.ensembl.org/Homo_sapiens/Variation/Summary?v=rs10737592	rs10737592	rs10737592	1	0.99	0.01	0	0	0.00021	0.37	0.11	-0.03	A	C	0.2	http://www.ncbi.nlm.nih.gov/sites/entrez?Db=gene&Cmd=ShowDetailView&TermToSearch=339479&ordinalpos=1&itool=EntrezSystem2.PEntrez.Gene.Gene_ResultsPanel.Gene_RVDocSum	FAM5C	FAM5C	542	http://www.ncbi.nlm.nih.gov/sites/entrez?Db=gene&Cmd=ShowDetailView&TermToSearch=NA&ordinalpos=1&itool=EntrezSystem2.PEntrez.Gene.Gene_ResultsPanel.Gene_RVDocSum	NA	NA	NA	http://www.ncbi.nlm.nih.gov/sites/entrez?Db=gene&Cmd=ShowDetailView&TermToSearch=NA&ordinalpos=1&itool=EntrezSystem2.PEntrez.Gene.Gene_ResultsPanel.Gene_RVDocSum	NA	NA	NA	2.2	1.4	-0.2	0.5	0.0016	0.28	0.031	-0.4	-0.1	-0.4	-0.3	0.17	0.89	0.98
http://www.ensembl.org/Homo_sapiens/Variation/Summary?v=rs1431144	rs1431144	rs1431144	1	0.99	0.01	0	0	0.0002	0.39	0.11	-0.03	A	G	0.2	http://www.ncbi.nlm.nih.gov/sites/entrez?Db=gene&Cmd=ShowDetailView&TermToSearch=339479&ordinalpos=1&itool=EntrezSystem2.PEntrez.Gene.Gene_ResultsPanel.Gene_RVDocSum	FAM5C	FAM5C	543	http://www.ncbi.nlm.nih.gov/sites/entrez?Db=gene&Cmd=ShowDetailView&TermToSearch=NA&ordinalpos=1&itool=EntrezSystem2.PEntrez.Gene.Gene_ResultsPanel.Gene_RVDocSum	NA	NA	NA	http://www.ncbi.nlm.nih.gov/sites/entrez?Db=gene&Cmd=ShowDetailView&TermToSearch=NA&ordinalpos=1&itool=EntrezSystem2.PEntrez.Gene.Gene_ResultsPanel.Gene_RVDocSum	NA	NA	NA	2.2	1.4	-0.2	0.6	0.0016	0.28	0.027	-0.5	-0.1	-0.4	-0.3	0.17	0.89	0.95
http://www.ensembl.org/Homo_sapiens/Variation/Summary?v=rs6656396	rs6656396	rs6656396	1	0.99	0.01	0	0	0.00026	0.37	0.11	-0.03	T	A	0.2	http://www.ncbi.nlm.nih.gov/sites/entrez?Db=gene&Cmd=ShowDetailView&TermToSearch=339479&ordinalpos=1&itool=EntrezSystem2.PEntrez.Gene.Gene_ResultsPanel.Gene_RVDocSum	FAM5C	FAM5C	545	http://www.ncbi.nlm.nih.gov/sites/entrez?Db=gene&Cmd=ShowDetailView&TermToSearch=NA&ordinalpos=1&itool=EntrezSystem2.PEntrez.Gene.Gene_ResultsPanel.Gene_RVDocSum	NA	NA	NA	http://www.ncbi.nlm.nih.gov/sites/entrez?Db=gene&Cmd=ShowDetailView&TermToSearch=NA&ordinalpos=1&itool=EntrezSystem2.PEntrez.Gene.Gene_ResultsPanel.Gene_RVDocSum	NA	NA	NA	2.1	1.4	-0.2	0.5	0.0017	0.31	0.033	-0.4	-0.2	-0.4	-0.3	0.18	0.91	0.99
http://www.ensembl.org/Homo_sapiens/Variation/Summary?v=rs6667584	rs6667584	rs6667584	1	0.99	0.01	0	0	0.00026	0.37	0.11	-0.03	G	A	0.2	http://www.ncbi.nlm.nih.gov/sites/entrez?Db=gene&Cmd=ShowDetailView&TermToSearch=339479&ordinalpos=1&itool=EntrezSystem2.PEntrez.Gene.Gene_ResultsPanel.Gene_RVDocSum	FAM5C	FAM5C	545	http://www.ncbi.nlm.nih.gov/sites/entrez?Db=gene&Cmd=ShowDetailView&TermToSearch=NA&ordinalpos=1&itool=EntrezSystem2.PEntrez.Gene.Gene_ResultsPanel.Gene_RVDocSum	NA	NA	NA	http://www.ncbi.nlm.nih.gov/sites/entrez?Db=gene&Cmd=ShowDetailView&TermToSearch=NA&ordinalpos=1&itool=EntrezSystem2.PEntrez.Gene.Gene_ResultsPanel.Gene_RVDocSum	NA	NA	NA	2.1	1.4	-0.2	0.5	0.0017	0.31	0.033	-0.4	-0.2	-0.4	-0.3	0.18	0.91	0.99
http://www.ensembl.org/Homo_sapiens/Variation/Summary?v=rs2116144	rs2116144	rs2116144	1	0.99	0.01	0	0	0.00022	0.36	0.12	-0.03	A	T	0.18	http://www.ncbi.nlm.nih.gov/sites/entrez?Db=gene&Cmd=ShowDetailView&TermToSearch=339479&ordinalpos=1&itool=EntrezSystem2.PEntrez.Gene.Gene_ResultsPanel.Gene_RVDocSum	FAM5C	FAM5C	546	http://www.ncbi.nlm.nih.gov/sites/entrez?Db=gene&Cmd=ShowDetailView&TermToSearch=NA&ordinalpos=1&itool=EntrezSystem2.PEntrez.Gene.Gene_ResultsPanel.Gene_RVDocSum	NA	NA	NA	http://www.ncbi.nlm.nih.gov/sites/entrez?Db=gene&Cmd=ShowDetailView&TermToSearch=NA&ordinalpos=1&itool=EntrezSystem2.PEntrez.Gene.Gene_ResultsPanel.Gene_RVDocSum	NA	NA	NA	2.2	1.4	-0.2	0.5	0.0019	0.29	0.027	-0.4	-0.1	-0.4	-0.3	0.17	0.81	0.95
http://www.ensembl.org/Homo_sapiens/Variation/Summary?v=rs7525875	rs7525875	rs7525875	1	0.99	0.01	0	0	0.00028	0.37	0.11	-0.03	G	A	0.2	http://www.ncbi.nlm.nih.gov/sites/entrez?Db=gene&Cmd=ShowDetailView&TermToSearch=339479&ordinalpos=1&itool=EntrezSystem2.PEntrez.Gene.Gene_ResultsPanel.Gene_RVDocSum	FAM5C	FAM5C	547	http://www.ncbi.nlm.nih.gov/sites/entrez?Db=gene&Cmd=ShowDetailView&TermToSearch=NA&ordinalpos=1&itool=EntrezSystem2.PEntrez.Gene.Gene_ResultsPanel.Gene_RVDocSum	NA	NA	NA	http://www.ncbi.nlm.nih.gov/sites/entrez?Db=gene&Cmd=ShowDetailView&TermToSearch=NA&ordinalpos=1&itool=EntrezSystem2.PEntrez.Gene.Gene_ResultsPanel.Gene_RVDocSum	NA	NA	NA	2	1.4	-0.2	0.5	0.0017	0.32	0.033	-0.4	-0.2	-0.4	-0.3	0.19	0.91	0.98
http://www.ensembl.org/Homo_sapiens/Variation/Summary?v=rs7515729	rs7515729	rs7515729	1	0.99	0.01	0	0	0.00022	0.35	0.12	-0.03	A	G	0.17	http://www.ncbi.nlm.nih.gov/sites/entrez?Db=gene&Cmd=ShowDetailView&TermToSearch=339479&ordinalpos=1&itool=EntrezSystem2.PEntrez.Gene.Gene_ResultsPanel.Gene_RVDocSum	FAM5C	FAM5C	547	http://www.ncbi.nlm.nih.gov/sites/entrez?Db=gene&Cmd=ShowDetailView&TermToSearch=NA&ordinalpos=1&itool=EntrezSystem2.PEntrez.Gene.Gene_ResultsPanel.Gene_RVDocSum	NA	NA	NA	http://www.ncbi.nlm.nih.gov/sites/entrez?Db=gene&Cmd=ShowDetailView&TermToSearch=NA&ordinalpos=1&itool=EntrezSystem2.PEntrez.Gene.Gene_ResultsPanel.Gene_RVDocSum	NA	NA	NA	2.2	1.4	-0.2	0.5	0.0019	0.29	0.027	-0.4	-0.1	-0.4	-0.2	0.16	0.82	0.93
http://www.ensembl.org/Homo_sapiens/Variation/Summary?v=rs6428032	rs6428032	rs6428032	1	0.99	0.01	0	0	0.00022	0.36	0.12	-0.03	G	A	0.18	http://www.ncbi.nlm.nih.gov/sites/entrez?Db=gene&Cmd=ShowDetailView&TermToSearch=339479&ordinalpos=1&itool=EntrezSystem2.PEntrez.Gene.Gene_ResultsPanel.Gene_RVDocSum	FAM5C	FAM5C	547	http://www.ncbi.nlm.nih.gov/sites/entrez?Db=gene&Cmd=ShowDetailView&TermToSearch=NA&ordinalpos=1&itool=EntrezSystem2.PEntrez.Gene.Gene_ResultsPanel.Gene_RVDocSum	NA	NA	NA	http://www.ncbi.nlm.nih.gov/sites/entrez?Db=gene&Cmd=ShowDetailView&TermToSearch=NA&ordinalpos=1&itool=EntrezSystem2.PEntrez.Gene.Gene_ResultsPanel.Gene_RVDocSum	NA	NA	NA	2.2	1.4	-0.2	0.5	0.0019	0.3	0.027	-0.4	-0.1	-0.4	-0.2	0.17	0.82	0.94
http://www.ensembl.org/Homo_sapiens/Variation/Summary?v=rs1367613	rs1367613	rs1367613	1	0.99	0.01	0	0	0.00019	0.4	0.11	-0.03	C	T	0.19	http://www.ncbi.nlm.nih.gov/sites/entrez?Db=gene&Cmd=ShowDetailView&TermToSearch=339479&ordinalpos=1&itool=EntrezSystem2.PEntrez.Gene.Gene_ResultsPanel.Gene_RVDocSum	FAM5C	FAM5C	557	http://www.ncbi.nlm.nih.gov/sites/entrez?Db=gene&Cmd=ShowDetailView&TermToSearch=NA&ordinalpos=1&itool=EntrezSystem2.PEntrez.Gene.Gene_ResultsPanel.Gene_RVDocSum	NA	NA	NA	http://www.ncbi.nlm.nih.gov/sites/entrez?Db=gene&Cmd=ShowDetailView&TermToSearch=NA&ordinalpos=1&itool=EntrezSystem2.PEntrez.Gene.Gene_ResultsPanel.Gene_RVDocSum	NA	NA	NA	2.2	1.4	-0.2	0.6	0.0016	0.32	0.025	-0.5	-0.2	-0.4	-0.3	0.22	0.8	0.97
http://www.ensembl.org/Homo_sapiens/Variation/Summary?v=rs10920868	rs10920868	rs10920868	1	0.98	0.02	0	0	0.00016	0.39	0.13	-0.03	C	T	0.17	http://www.ncbi.nlm.nih.gov/sites/entrez?Db=gene&Cmd=ShowDetailView&TermToSearch=339479&ordinalpos=1&itool=EntrezSystem2.PEntrez.Gene.Gene_ResultsPanel.Gene_RVDocSum	FAM5C	FAM5C	560	http://www.ncbi.nlm.nih.gov/sites/entrez?Db=gene&Cmd=ShowDetailView&TermToSearch=NA&ordinalpos=1&itool=EntrezSystem2.PEntrez.Gene.Gene_ResultsPanel.Gene_RVDocSum	NA	NA	NA	http://www.ncbi.nlm.nih.gov/sites/entrez?Db=gene&Cmd=ShowDetailView&TermToSearch=NA&ordinalpos=1&itool=EntrezSystem2.PEntrez.Gene.Gene_ResultsPanel.Gene_RVDocSum	NA	NA	NA	2.3	1.5	-0.2	0.5	0.0015	0.3	0.028	-0.4	-0.2	-0.3	-0.2	0.2	0.74	0.99
rs-link	rsnum	SNP	chr	HO	HS	HD	HS+D	P-value-S	P-value-D	Effect-S	Effect-D	Minor Allele	Major Allele	MAF	GENE1-link	GENE1	GENE1	dist1 (Kb)	GENE2-link	GENE2	GENE2	dist2 (Kb)	GENE3-link	GENE3	GENE3	dist3 (Kb)	log10BF-S	log10BF-S-TNT	log10BF-S-PRINCE	log10BF-S-CAP	P-value-S-TNT	P-value-S-PRINCE	P-value-S-CAP	log10BF-D	log10BF-D-TNT	log10BF-D-PRINCE	log10BF-D-CAP	P-value-D-TNT	P-value-D-PRINCE	P-value-D-CAP
http://www.ensembl.org/Homo_sapiens/Variation/Summary?v=rs1431136	rs1431136	rs1431136	1	0.98	0.02	0	0	0.00014	0.53	0.11	-0.02	C	T	0.2	http://www.ncbi.nlm.nih.gov/sites/entrez?Db=gene&Cmd=ShowDetailView&TermToSearch=339479&ordinalpos=1&itool=EntrezSystem2.PEntrez.Gene.Gene_ResultsPanel.Gene_RVDocSum	FAM5C	FAM5C	562	http://www.ncbi.nlm.nih.gov/sites/entrez?Db=gene&Cmd=ShowDetailView&TermToSearch=NA&ordinalpos=1&itool=EntrezSystem2.PEntrez.Gene.Gene_ResultsPanel.Gene_RVDocSum	NA	NA	NA	http://www.ncbi.nlm.nih.gov/sites/entrez?Db=gene&Cmd=ShowDetailView&TermToSearch=NA&ordinalpos=1&itool=EntrezSystem2.PEntrez.Gene.Gene_ResultsPanel.Gene_RVDocSum	NA	NA	NA	2.3	1.5	-0.2	0.6	0.0013	0.34	0.019	-0.6	-0.4	-0.4	-0.2	0.39	0.8	0.94
http://www.ensembl.org/Homo_sapiens/Variation/Summary?v=rs4469716	rs4469716	rs4469716	1	0.98	0.02	0	0	0.00017	0.39	0.13	-0.03	T	G	0.16	http://www.ncbi.nlm.nih.gov/sites/entrez?Db=gene&Cmd=ShowDetailView&TermToSearch=339479&ordinalpos=1&itool=EntrezSystem2.PEntrez.Gene.Gene_ResultsPanel.Gene_RVDocSum	FAM5C	FAM5C	564	http://www.ncbi.nlm.nih.gov/sites/entrez?Db=gene&Cmd=ShowDetailView&TermToSearch=NA&ordinalpos=1&itool=EntrezSystem2.PEntrez.Gene.Gene_ResultsPanel.Gene_RVDocSum	NA	NA	NA	http://www.ncbi.nlm.nih.gov/sites/entrez?Db=gene&Cmd=ShowDetailView&TermToSearch=NA&ordinalpos=1&itool=EntrezSystem2.PEntrez.Gene.Gene_ResultsPanel.Gene_RVDocSum	NA	NA	NA	2.3	1.4	-0.2	0.5	0.0016	0.31	0.026	-0.4	-0.2	-0.3	-0.2	0.19	0.73	1
http://www.ensembl.org/Homo_sapiens/Variation/Summary?v=rs2033386	rs2033386	rs2033386	1	0.98	0.02	0	0	0.00014	0.43	0.12	-0.03	A	G	0.18	http://www.ncbi.nlm.nih.gov/sites/entrez?Db=gene&Cmd=ShowDetailView&TermToSearch=339479&ordinalpos=1&itool=EntrezSystem2.PEntrez.Gene.Gene_ResultsPanel.Gene_RVDocSum	FAM5C	FAM5C	566	http://www.ncbi.nlm.nih.gov/sites/entrez?Db=gene&Cmd=ShowDetailView&TermToSearch=NA&ordinalpos=1&itool=EntrezSystem2.PEntrez.Gene.Gene_ResultsPanel.Gene_RVDocSum	NA	NA	NA	http://www.ncbi.nlm.nih.gov/sites/entrez?Db=gene&Cmd=ShowDetailView&TermToSearch=NA&ordinalpos=1&itool=EntrezSystem2.PEntrez.Gene.Gene_ResultsPanel.Gene_RVDocSum	NA	NA	NA	2.3	1.5	-0.2	0.6	0.0014	0.32	0.02	-0.5	-0.3	-0.3	-0.2	0.25	0.8	0.99
http://www.ensembl.org/Homo_sapiens/Variation/Summary?v=rs9804121	rs9804121	rs9804121	1	0.98	0.02	0	0	0.00017	0.36	0.14	-0.03	C	T	0.2	http://www.ncbi.nlm.nih.gov/sites/entrez?Db=gene&Cmd=ShowDetailView&TermToSearch=339479&ordinalpos=1&itool=EntrezSystem2.PEntrez.Gene.Gene_ResultsPanel.Gene_RVDocSum	FAM5C	FAM5C	578	http://www.ncbi.nlm.nih.gov/sites/entrez?Db=gene&Cmd=ShowDetailView&TermToSearch=NA&ordinalpos=1&itool=EntrezSystem2.PEntrez.Gene.Gene_ResultsPanel.Gene_RVDocSum	NA	NA	NA	http://www.ncbi.nlm.nih.gov/sites/entrez?Db=gene&Cmd=ShowDetailView&TermToSearch=NA&ordinalpos=1&itool=EntrezSystem2.PEntrez.Gene.Gene_ResultsPanel.Gene_RVDocSum	NA	NA	NA	2.2	1.4	-0.2	0.6	0.0015	0.3	0.021	-0.4	0	-0.3	-0.2	0.14	0.76	0.92
http://www.ensembl.org/Homo_sapiens/Variation/Summary?v=rs7521523	rs7521523	rs7521523	1	0.99	0.01	0	0	0.0002	0.35	0.14	-0.04	G	C	0.2	http://www.ncbi.nlm.nih.gov/sites/entrez?Db=gene&Cmd=ShowDetailView&TermToSearch=339479&ordinalpos=1&itool=EntrezSystem2.PEntrez.Gene.Gene_ResultsPanel.Gene_RVDocSum	FAM5C	FAM5C	580	http://www.ncbi.nlm.nih.gov/sites/entrez?Db=gene&Cmd=ShowDetailView&TermToSearch=NA&ordinalpos=1&itool=EntrezSystem2.PEntrez.Gene.Gene_ResultsPanel.Gene_RVDocSum	NA	NA	NA	http://www.ncbi.nlm.nih.gov/sites/entrez?Db=gene&Cmd=ShowDetailView&TermToSearch=NA&ordinalpos=1&itool=EntrezSystem2.PEntrez.Gene.Gene_ResultsPanel.Gene_RVDocSum	NA	NA	NA	2.2	1.4	-0.2	0.6	0.0017	0.3	0.021	-0.4	0	-0.3	-0.2	0.12	0.76	0.92
http://www.ensembl.org/Homo_sapiens/Variation/Summary?v=rs4845264	rs4845264	rs4845264	1	0.99	0.01	0	0	0.00027	0.26	0.17	-0.05	A	C	0.19	http://www.ncbi.nlm.nih.gov/sites/entrez?Db=gene&Cmd=ShowDetailView&TermToSearch=339479&ordinalpos=1&itool=EntrezSystem2.PEntrez.Gene.Gene_ResultsPanel.Gene_RVDocSum	FAM5C	FAM5C	603	http://www.ncbi.nlm.nih.gov/sites/entrez?Db=gene&Cmd=ShowDetailView&TermToSearch=NA&ordinalpos=1&itool=EntrezSystem2.PEntrez.Gene.Gene_ResultsPanel.Gene_RVDocSum	NA	NA	NA	http://www.ncbi.nlm.nih.gov/sites/entrez?Db=gene&Cmd=ShowDetailView&TermToSearch=NA&ordinalpos=1&itool=EntrezSystem2.PEntrez.Gene.Gene_ResultsPanel.Gene_RVDocSum	NA	NA	NA	2.1	1.4	-0.1	0.4	0.0016	0.33	0.032	-0.2	0.1	-0.3	-0.2	0.081	0.76	0.91
http://www.ensembl.org/Homo_sapiens/Variation/Summary?v=rs1160457	rs1160457	rs1160457	1	0.99	0.01	0	0	0.00033	0.23	0.16	-0.05	T	G	0.17	http://www.ncbi.nlm.nih.gov/sites/entrez?Db=gene&Cmd=ShowDetailView&TermToSearch=339479&ordinalpos=1&itool=EntrezSystem2.PEntrez.Gene.Gene_ResultsPanel.Gene_RVDocSum	FAM5C	FAM5C	614	http://www.ncbi.nlm.nih.gov/sites/entrez?Db=gene&Cmd=ShowDetailView&TermToSearch=NA&ordinalpos=1&itool=EntrezSystem2.PEntrez.Gene.Gene_ResultsPanel.Gene_RVDocSum	NA	NA	NA	http://www.ncbi.nlm.nih.gov/sites/entrez?Db=gene&Cmd=ShowDetailView&TermToSearch=NA&ordinalpos=1&itool=EntrezSystem2.PEntrez.Gene.Gene_ResultsPanel.Gene_RVDocSum	NA	NA	NA	2	1.4	-0.2	0.3	0.0017	0.39	0.039	-0.2	0.2	-0.3	-0.2	0.069	0.77	0.92
http://www.ensembl.org/Homo_sapiens/Variation/Summary?v=rs6673820	rs6673820	rs6673820	1	0.94	0.06	0	0	2.4e-05	0.94	0.1	0	A	G	0.44	http://www.ncbi.nlm.nih.gov/sites/entrez?Db=gene&Cmd=ShowDetailView&TermToSearch=115019&ordinalpos=1&itool=EntrezSystem2.PEntrez.Gene.Gene_ResultsPanel.Gene_RVDocSum	SLC26A9	SLC26A9	0	http://www.ncbi.nlm.nih.gov/sites/entrez?Db=gene&Cmd=ShowDetailView&TermToSearch=148811&ordinalpos=1&itool=EntrezSystem2.PEntrez.Gene.Gene_ResultsPanel.Gene_RVDocSum	FLJ32569	FLJ32569	91	http://www.ncbi.nlm.nih.gov/sites/entrez?Db=gene&Cmd=ShowDetailView&TermToSearch=729533&ordinalpos=1&itool=EntrezSystem2.PEntrez.Gene.Gene_ResultsPanel.Gene_RVDocSum	LOC729533	LOC729533	122	2.8	2	0.2	-0.2	0.00022	0.047	0.29	-0.8	-0.6	-0.4	-0.1	0.81	0.6	0.17
http://www.ensembl.org/Homo_sapiens/Variation/Summary?v=rs6661355	rs6661355	rs6661355	1	0.94	0.05	0	0	2.3e-05	0.99	0.1	0	C	T	0.44	http://www.ncbi.nlm.nih.gov/sites/entrez?Db=gene&Cmd=ShowDetailView&TermToSearch=115019&ordinalpos=1&itool=EntrezSystem2.PEntrez.Gene.Gene_ResultsPanel.Gene_RVDocSum	SLC26A9	SLC26A9	0	http://www.ncbi.nlm.nih.gov/sites/entrez?Db=gene&Cmd=ShowDetailView&TermToSearch=148811&ordinalpos=1&itool=EntrezSystem2.PEntrez.Gene.Gene_ResultsPanel.Gene_RVDocSum	FLJ32569	FLJ32569	91	http://www.ncbi.nlm.nih.gov/sites/entrez?Db=gene&Cmd=ShowDetailView&TermToSearch=729533&ordinalpos=1&itool=EntrezSystem2.PEntrez.Gene.Gene_ResultsPanel.Gene_RVDocSum	LOC729533	LOC729533	122	2.8	2	0.2	-0.2	0.00021	0.05	0.29	-0.8	-0.6	-0.4	-0.1	0.77	0.59	0.18
http://www.ensembl.org/Homo_sapiens/Variation/Summary?v=rs7419153	rs7419153	rs7419153	1	0.98	0.02	0	0	9e-05	0.9	0.1	0	A	G	0.44	http://www.ncbi.nlm.nih.gov/sites/entrez?Db=gene&Cmd=ShowDetailView&TermToSearch=115019&ordinalpos=1&itool=EntrezSystem2.PEntrez.Gene.Gene_ResultsPanel.Gene_RVDocSum	SLC26A9	SLC26A9	5	http://www.ncbi.nlm.nih.gov/sites/entrez?Db=gene&Cmd=ShowDetailView&TermToSearch=148811&ordinalpos=1&itool=EntrezSystem2.PEntrez.Gene.Gene_ResultsPanel.Gene_RVDocSum	FLJ32569	FLJ32569	98	http://www.ncbi.nlm.nih.gov/sites/entrez?Db=gene&Cmd=ShowDetailView&TermToSearch=729533&ordinalpos=1&itool=EntrezSystem2.PEntrez.Gene.Gene_ResultsPanel.Gene_RVDocSum	LOC729533	LOC729533	116	2.3	1.3	0.8	-0.3	0.0017	0.0083	0.56	-0.7	-0.5	-0.3	0.1	0.86	0.39	0.067
http://www.ensembl.org/Homo_sapiens/Variation/Summary?v=rs6697517	rs6697517	rs6697517	1	0.99	0.01	0	0	0.00025	0.51	0.11	-0.02	C	T	0.32	http://www.ncbi.nlm.nih.gov/sites/entrez?Db=gene&Cmd=ShowDetailView&TermToSearch=645395&ordinalpos=1&itool=EntrezSystem2.PEntrez.Gene.Gene_ResultsPanel.Gene_RVDocSum	LOC645395	LOC645395	29	http://www.ncbi.nlm.nih.gov/sites/entrez?Db=gene&Cmd=ShowDetailView&TermToSearch=84284&ordinalpos=1&itool=EntrezSystem2.PEntrez.Gene.Gene_ResultsPanel.Gene_RVDocSum	C1orf57	C1orf57	62	http://www.ncbi.nlm.nih.gov/sites/entrez?Db=gene&Cmd=ShowDetailView&TermToSearch=54627&ordinalpos=1&itool=EntrezSystem2.PEntrez.Gene.Gene_ResultsPanel.Gene_RVDocSum	KIAA1383	KIAA1383	78	2.1	0	2.3	-0.1	0.15	7.4e-05	0.29	-0.5	-0.3	-0.3	-0.2	0.24	0.35	0.42
http://www.ensembl.org/Homo_sapiens/Variation/Summary?v=rs1417301	rs1417301	rs1417301	1	0.99	0.01	0	0	0.00013	0.67	-0.1	-0.01	A	G	0.32	http://www.ncbi.nlm.nih.gov/sites/entrez?Db=gene&Cmd=ShowDetailView&TermToSearch=645745&ordinalpos=1&itool=EntrezSystem2.PEntrez.Gene.Gene_ResultsPanel.Gene_RVDocSum	LOC645745	LOC645745	0	http://www.ncbi.nlm.nih.gov/sites/entrez?Db=gene&Cmd=ShowDetailView&TermToSearch=440737&ordinalpos=1&itool=EntrezSystem2.PEntrez.Gene.Gene_ResultsPanel.Gene_RVDocSum	LOC440737	LOC440737	23	http://www.ncbi.nlm.nih.gov/sites/entrez?Db=gene&Cmd=ShowDetailView&TermToSearch=6262&ordinalpos=1&itool=EntrezSystem2.PEntrez.Gene.Gene_ResultsPanel.Gene_RVDocSum	RYR2	RYR2	37	2.2	0.4	0.3	0.7	0.021	0.038	0.015	-0.6	-0.5	-0.4	-0.3	0.65	0.83	0.95
http://www.ensembl.org/Homo_sapiens/Variation/Summary?v=rs868724	rs868724	rs868724	1	0.94	0.06	0	0	3.5e-05	0.51	0.1	0.02	T	G	0.36	http://www.ncbi.nlm.nih.gov/sites/entrez?Db=gene&Cmd=ShowDetailView&TermToSearch=81470&ordinalpos=1&itool=EntrezSystem2.PEntrez.Gene.Gene_ResultsPanel.Gene_RVDocSum	OR2G2	OR2G2	1	http://www.ncbi.nlm.nih.gov/sites/entrez?Db=gene&Cmd=ShowDetailView&TermToSearch=148823&ordinalpos=1&itool=EntrezSystem2.PEntrez.Gene.Gene_ResultsPanel.Gene_RVDocSum	C1orf150	C1orf150	13	http://www.ncbi.nlm.nih.gov/sites/entrez?Db=gene&Cmd=ShowDetailView&TermToSearch=81469&ordinalpos=1&itool=EntrezSystem2.PEntrez.Gene.Gene_ResultsPanel.Gene_RVDocSum	OR2G3	OR2G3	16	2.8	0.3	0.3	2.5	0.057	0.036	3.8e-05	-0.6	-0.6	-0.1	-0.3	0.67	0.14	0.76
http://www.ensembl.org/Homo_sapiens/Variation/Summary?v=rs1151685	rs1151685	rs1151685	1	0.94	0.06	0	0	3.5e-05	0.53	0.1	0.01	G	A	0.36	http://www.ncbi.nlm.nih.gov/sites/entrez?Db=gene&Cmd=ShowDetailView&TermToSearch=81470&ordinalpos=1&itool=EntrezSystem2.PEntrez.Gene.Gene_ResultsPanel.Gene_RVDocSum	OR2G2	OR2G2	1	http://www.ncbi.nlm.nih.gov/sites/entrez?Db=gene&Cmd=ShowDetailView&TermToSearch=148823&ordinalpos=1&itool=EntrezSystem2.PEntrez.Gene.Gene_ResultsPanel.Gene_RVDocSum	C1orf150	C1orf150	13	http://www.ncbi.nlm.nih.gov/sites/entrez?Db=gene&Cmd=ShowDetailView&TermToSearch=81469&ordinalpos=1&itool=EntrezSystem2.PEntrez.Gene.Gene_ResultsPanel.Gene_RVDocSum	OR2G3	OR2G3	16	2.8	0.3	0.3	2.4	0.057	0.035	4.4e-05	-0.6	-0.6	-0.1	-0.3	0.66	0.15	0.78
http://www.ensembl.org/Homo_sapiens/Variation/Summary?v=rs4002806	rs4002806	rs4002806	1	0.95	0.05	0	0	4e-05	0.57	0.1	0.01	T	C	0.36	http://www.ncbi.nlm.nih.gov/sites/entrez?Db=gene&Cmd=ShowDetailView&TermToSearch=81469&ordinalpos=1&itool=EntrezSystem2.PEntrez.Gene.Gene_ResultsPanel.Gene_RVDocSum	OR2G3	OR2G3	8	http://www.ncbi.nlm.nih.gov/sites/entrez?Db=gene&Cmd=ShowDetailView&TermToSearch=81470&ordinalpos=1&itool=EntrezSystem2.PEntrez.Gene.Gene_ResultsPanel.Gene_RVDocSum	OR2G2	OR2G2	9	http://www.ncbi.nlm.nih.gov/sites/entrez?Db=gene&Cmd=ShowDetailView&TermToSearch=148823&ordinalpos=1&itool=EntrezSystem2.PEntrez.Gene.Gene_ResultsPanel.Gene_RVDocSum	C1orf150	C1orf150	21	2.8	0.2	0.3	2.3	0.068	0.03	6.1e-05	-0.6	-0.6	-0.1	-0.4	0.68	0.16	0.92
http://www.ensembl.org/Homo_sapiens/Variation/Summary?v=rs7523061	rs7523061	rs7523061	1	0.95	0.05	0	0	4.2e-05	0.55	0.1	0.01	C	T	0.36	http://www.ncbi.nlm.nih.gov/sites/entrez?Db=gene&Cmd=ShowDetailView&TermToSearch=81469&ordinalpos=1&itool=EntrezSystem2.PEntrez.Gene.Gene_ResultsPanel.Gene_RVDocSum	OR2G3	OR2G3	7	http://www.ncbi.nlm.nih.gov/sites/entrez?Db=gene&Cmd=ShowDetailView&TermToSearch=81470&ordinalpos=1&itool=EntrezSystem2.PEntrez.Gene.Gene_ResultsPanel.Gene_RVDocSum	OR2G2	OR2G2	10	http://www.ncbi.nlm.nih.gov/sites/entrez?Db=gene&Cmd=ShowDetailView&TermToSearch=127617&ordinalpos=1&itool=EntrezSystem2.PEntrez.Gene.Gene_ResultsPanel.Gene_RVDocSum	OR5AV1P	OR5AV1P	21	2.7	0.2	0.3	2.3	0.071	0.029	7.3e-05	-0.6	-0.6	-0.1	-0.4	0.69	0.15	0.91
http://www.ensembl.org/Homo_sapiens/Variation/Summary?v=rs4925690	rs4925690	rs4925690	1	0.97	0.03	0	0	7.6e-05	0.59	0.1	0.01	A	G	0.38	http://www.ncbi.nlm.nih.gov/sites/entrez?Db=gene&Cmd=ShowDetailView&TermToSearch=81469&ordinalpos=1&itool=EntrezSystem2.PEntrez.Gene.Gene_ResultsPanel.Gene_RVDocSum	OR2G3	OR2G3	4	http://www.ncbi.nlm.nih.gov/sites/entrez?Db=gene&Cmd=ShowDetailView&TermToSearch=81470&ordinalpos=1&itool=EntrezSystem2.PEntrez.Gene.Gene_ResultsPanel.Gene_RVDocSum	OR2G2	OR2G2	12	http://www.ncbi.nlm.nih.gov/sites/entrez?Db=gene&Cmd=ShowDetailView&TermToSearch=127617&ordinalpos=1&itool=EntrezSystem2.PEntrez.Gene.Gene_ResultsPanel.Gene_RVDocSum	OR5AV1P	OR5AV1P	19	2.5	0.1	0.2	2.6	0.096	0.041	3e-05	-0.6	-0.6	-0.1	-0.3	0.72	0.18	0.95
http://www.ensembl.org/Homo_sapiens/Variation/Summary?v=rs12619737	rs12619737	rs12619737	2	0.99	0.01	0	0	0.00017	0.35	-0.11	-0.03	T	C	0.23	http://www.ncbi.nlm.nih.gov/sites/entrez?Db=gene&Cmd=ShowDetailView&TermToSearch=60526&ordinalpos=1&itool=EntrezSystem2.PEntrez.Gene.Gene_ResultsPanel.Gene_RVDocSum	FLJ21820	FLJ21820	53	http://www.ncbi.nlm.nih.gov/sites/entrez?Db=gene&Cmd=ShowDetailView&TermToSearch=338&ordinalpos=1&itool=EntrezSystem2.PEntrez.Gene.Gene_ResultsPanel.Gene_RVDocSum	APOB	APOB	138	http://www.ncbi.nlm.nih.gov/sites/entrez?Db=gene&Cmd=ShowDetailView&TermToSearch=151449&ordinalpos=1&itool=EntrezSystem2.PEntrez.Gene.Gene_ResultsPanel.Gene_RVDocSum	GDF7	GDF7	205	2.1	1.9	0.2	-0.3	0.00028	0.051	0.91	-0.4	0.3	-0.4	-0.3	0.043	0.57	0.66
http://www.ensembl.org/Homo_sapiens/Variation/Summary?v=rs1437401	rs1437401	rs1437401	2	0.99	0.01	0	0	0.00018	0.33	-0.11	-0.03	G	C	0.24	http://www.ncbi.nlm.nih.gov/sites/entrez?Db=gene&Cmd=ShowDetailView&TermToSearch=60526&ordinalpos=1&itool=EntrezSystem2.PEntrez.Gene.Gene_ResultsPanel.Gene_RVDocSum	FLJ21820	FLJ21820	61	http://www.ncbi.nlm.nih.gov/sites/entrez?Db=gene&Cmd=ShowDetailView&TermToSearch=338&ordinalpos=1&itool=EntrezSystem2.PEntrez.Gene.Gene_ResultsPanel.Gene_RVDocSum	APOB	APOB	130	http://www.ncbi.nlm.nih.gov/sites/entrez?Db=gene&Cmd=ShowDetailView&TermToSearch=151449&ordinalpos=1&itool=EntrezSystem2.PEntrez.Gene.Gene_ResultsPanel.Gene_RVDocSum	GDF7	GDF7	213	2.1	1.9	0.2	-0.3	0.00027	0.05	0.93	-0.4	0.3	-0.4	-0.3	0.044	0.61	0.68
http://www.ensembl.org/Homo_sapiens/Variation/Summary?v=rs1260326	rs1260326	rs1260326	2	0.97	0.03	0	0	7.3e-05	0.89	0.09	0	T	C	0.45	http://www.ncbi.nlm.nih.gov/sites/entrez?Db=gene&Cmd=ShowDetailView&TermToSearch=2646&ordinalpos=1&itool=EntrezSystem2.PEntrez.Gene.Gene_ResultsPanel.Gene_RVDocSum	GCKR	GCKR	0	http://www.ncbi.nlm.nih.gov/sites/entrez?Db=gene&Cmd=ShowDetailView&TermToSearch=729823&ordinalpos=1&itool=EntrezSystem2.PEntrez.Gene.Gene_ResultsPanel.Gene_RVDocSum	LOC729823	LOC729823	11	http://www.ncbi.nlm.nih.gov/sites/entrez?Db=gene&Cmd=ShowDetailView&TermToSearch=64838&ordinalpos=1&itool=EntrezSystem2.PEntrez.Gene.Gene_ResultsPanel.Gene_RVDocSum	FNDC4	FNDC4	13	2.5	3	-0.3	-0.1	2.6e-05	0.32	0.25	-0.8	-0.2	-0.4	-0.3	0.14	0.35	0.45
http://www.ensembl.org/Homo_sapiens/Variation/Summary?v=rs780094	rs780094	rs780094	2	0.98	0.02	0	0	0.00012	0.97	0.09	0	T	C	0.42	http://www.ncbi.nlm.nih.gov/sites/entrez?Db=gene&Cmd=ShowDetailView&TermToSearch=2646&ordinalpos=1&itool=EntrezSystem2.PEntrez.Gene.Gene_ResultsPanel.Gene_RVDocSum	GCKR	GCKR	0	http://www.ncbi.nlm.nih.gov/sites/entrez?Db=gene&Cmd=ShowDetailView&TermToSearch=729823&ordinalpos=1&itool=EntrezSystem2.PEntrez.Gene.Gene_ResultsPanel.Gene_RVDocSum	LOC729823	LOC729823	22	http://www.ncbi.nlm.nih.gov/sites/entrez?Db=gene&Cmd=ShowDetailView&TermToSearch=64838&ordinalpos=1&itool=EntrezSystem2.PEntrez.Gene.Gene_ResultsPanel.Gene_RVDocSum	FNDC4	FNDC4	23	2.4	3.2	-0.4	-0.2	2e-05	0.45	0.35	-0.8	-0.3	-0.3	-0.3	0.19	0.23	0.46
http://www.ensembl.org/Homo_sapiens/Variation/Summary?v=rs780093	rs780093	rs780093	2	0.98	0.02	0	0	0.00013	0.97	0.09	0	T	C	0.42	http://www.ncbi.nlm.nih.gov/sites/entrez?Db=gene&Cmd=ShowDetailView&TermToSearch=2646&ordinalpos=1&itool=EntrezSystem2.PEntrez.Gene.Gene_ResultsPanel.Gene_RVDocSum	GCKR	GCKR	0	http://www.ncbi.nlm.nih.gov/sites/entrez?Db=gene&Cmd=ShowDetailView&TermToSearch=729823&ordinalpos=1&itool=EntrezSystem2.PEntrez.Gene.Gene_ResultsPanel.Gene_RVDocSum	LOC729823	LOC729823	23	http://www.ncbi.nlm.nih.gov/sites/entrez?Db=gene&Cmd=ShowDetailView&TermToSearch=64838&ordinalpos=1&itool=EntrezSystem2.PEntrez.Gene.Gene_ResultsPanel.Gene_RVDocSum	FNDC4	FNDC4	25	2.4	3.2	-0.4	-0.2	2e-05	0.46	0.35	-0.8	-0.3	-0.3	-0.3	0.18	0.23	0.46
http://www.ensembl.org/Homo_sapiens/Variation/Summary?v=rs4665987	rs4665987	rs4665987	2	0.97	0.03	0	0	7e-05	0.46	0.11	-0.02	A	G	0.25	http://www.ncbi.nlm.nih.gov/sites/entrez?Db=gene&Cmd=ShowDetailView&TermToSearch=2646&ordinalpos=1&itool=EntrezSystem2.PEntrez.Gene.Gene_ResultsPanel.Gene_RVDocSum	GCKR	GCKR	9	http://www.ncbi.nlm.nih.gov/sites/entrez?Db=gene&Cmd=ShowDetailView&TermToSearch=729823&ordinalpos=1&itool=EntrezSystem2.PEntrez.Gene.Gene_ResultsPanel.Gene_RVDocSum	LOC729823	LOC729823	36	http://www.ncbi.nlm.nih.gov/sites/entrez?Db=gene&Cmd=ShowDetailView&TermToSearch=64838&ordinalpos=1&itool=EntrezSystem2.PEntrez.Gene.Gene_ResultsPanel.Gene_RVDocSum	FNDC4	FNDC4	38	2.5	2.6	0.1	-0.3	5.3e-05	0.063	0.62	-0.6	-0.4	-0.3	-0.1	0.47	0.34	0.16
http://www.ensembl.org/Homo_sapiens/Variation/Summary?v=rs4665991	rs4665991	rs4665991	2	0.98	0.02	0	0	7.8e-05	0.44	0.11	-0.02	A	G	0.25	http://www.ncbi.nlm.nih.gov/sites/entrez?Db=gene&Cmd=ShowDetailView&TermToSearch=2646&ordinalpos=1&itool=EntrezSystem2.PEntrez.Gene.Gene_ResultsPanel.Gene_RVDocSum	GCKR	GCKR	20	http://www.ncbi.nlm.nih.gov/sites/entrez?Db=gene&Cmd=ShowDetailView&TermToSearch=84226&ordinalpos=1&itool=EntrezSystem2.PEntrez.Gene.Gene_ResultsPanel.Gene_RVDocSum	C2orf16	C2orf16	33	http://www.ncbi.nlm.nih.gov/sites/entrez?Db=gene&Cmd=ShowDetailView&TermToSearch=84450&ordinalpos=1&itool=EntrezSystem2.PEntrez.Gene.Gene_ResultsPanel.Gene_RVDocSum	ZNF512	ZNF512	40	2.4	2.5	0.1	-0.3	6.8e-05	0.059	0.62	-0.5	-0.4	-0.3	0	0.49	0.35	0.15
http://www.ensembl.org/Homo_sapiens/Variation/Summary?v=rs4665382	rs4665382	rs4665382	2	0.98	0.02	0	0	7.5e-05	0.44	0.11	-0.02	C	T	0.25	http://www.ncbi.nlm.nih.gov/sites/entrez?Db=gene&Cmd=ShowDetailView&TermToSearch=84226&ordinalpos=1&itool=EntrezSystem2.PEntrez.Gene.Gene_ResultsPanel.Gene_RVDocSum	C2orf16	C2orf16	16	http://www.ncbi.nlm.nih.gov/sites/entrez?Db=gene&Cmd=ShowDetailView&TermToSearch=84450&ordinalpos=1&itool=EntrezSystem2.PEntrez.Gene.Gene_ResultsPanel.Gene_RVDocSum	ZNF512	ZNF512	22	http://www.ncbi.nlm.nih.gov/sites/entrez?Db=gene&Cmd=ShowDetailView&TermToSearch=2646&ordinalpos=1&itool=EntrezSystem2.PEntrez.Gene.Gene_ResultsPanel.Gene_RVDocSum	GCKR	GCKR	37	2.4	2.5	0.2	-0.3	6.8e-05	0.057	0.61	-0.5	-0.4	-0.3	0	0.5	0.35	0.15
http://www.ensembl.org/Homo_sapiens/Variation/Summary?v=rs10208529	rs10208529	rs10208529	2	0.98	0.02	0	0	7.8e-05	0.44	0.11	-0.02	T	A	0.25	http://www.ncbi.nlm.nih.gov/sites/entrez?Db=gene&Cmd=ShowDetailView&TermToSearch=84226&ordinalpos=1&itool=EntrezSystem2.PEntrez.Gene.Gene_ResultsPanel.Gene_RVDocSum	C2orf16	C2orf16	13	http://www.ncbi.nlm.nih.gov/sites/entrez?Db=gene&Cmd=ShowDetailView&TermToSearch=84450&ordinalpos=1&itool=EntrezSystem2.PEntrez.Gene.Gene_ResultsPanel.Gene_RVDocSum	ZNF512	ZNF512	20	http://www.ncbi.nlm.nih.gov/sites/entrez?Db=gene&Cmd=ShowDetailView&TermToSearch=2646&ordinalpos=1&itool=EntrezSystem2.PEntrez.Gene.Gene_ResultsPanel.Gene_RVDocSum	GCKR	GCKR	40	2.4	2.5	0.1	-0.3	6.9e-05	0.059	0.61	-0.5	-0.4	-0.3	0	0.49	0.34	0.15
http://www.ensembl.org/Homo_sapiens/Variation/Summary?v=rs4665383	rs4665383	rs4665383	2	0.98	0.02	0	0	7.7e-05	0.44	0.11	-0.02	G	C	0.25	http://www.ncbi.nlm.nih.gov/sites/entrez?Db=gene&Cmd=ShowDetailView&TermToSearch=84226&ordinalpos=1&itool=EntrezSystem2.PEntrez.Gene.Gene_ResultsPanel.Gene_RVDocSum	C2orf16	C2orf16	8	http://www.ncbi.nlm.nih.gov/sites/entrez?Db=gene&Cmd=ShowDetailView&TermToSearch=84450&ordinalpos=1&itool=EntrezSystem2.PEntrez.Gene.Gene_ResultsPanel.Gene_RVDocSum	ZNF512	ZNF512	14	http://www.ncbi.nlm.nih.gov/sites/entrez?Db=gene&Cmd=ShowDetailView&TermToSearch=2646&ordinalpos=1&itool=EntrezSystem2.PEntrez.Gene.Gene_ResultsPanel.Gene_RVDocSum	GCKR	GCKR	45	2.4	2.5	0.1	-0.3	6.9e-05	0.059	0.6	-0.6	-0.4	-0.3	-0.1	0.49	0.34	0.17
http://www.ensembl.org/Homo_sapiens/Variation/Summary?v=rs1919127	rs1919127	rs1919127	2	0.97	0.03	0	0	5.5e-05	0.45	0.11	-0.02	C	T	0.26	http://www.ncbi.nlm.nih.gov/sites/entrez?Db=gene&Cmd=ShowDetailView&TermToSearch=84226&ordinalpos=1&itool=EntrezSystem2.PEntrez.Gene.Gene_ResultsPanel.Gene_RVDocSum	C2orf16	C2orf16	0	http://www.ncbi.nlm.nih.gov/sites/entrez?Db=gene&Cmd=ShowDetailView&TermToSearch=84450&ordinalpos=1&itool=EntrezSystem2.PEntrez.Gene.Gene_ResultsPanel.Gene_RVDocSum	ZNF512	ZNF512	4	http://www.ncbi.nlm.nih.gov/sites/entrez?Db=gene&Cmd=ShowDetailView&TermToSearch=79635&ordinalpos=1&itool=EntrezSystem2.PEntrez.Gene.Gene_ResultsPanel.Gene_RVDocSum	FLJ13646	FLJ13646	47	2.6	2.4	0.1	-0.3	7.8e-05	0.059	0.51	-0.6	-0.4	-0.2	-0.2	0.46	0.22	0.27
http://www.ensembl.org/Homo_sapiens/Variation/Summary?v=rs1919128	rs1919128	rs1919128	2	0.97	0.03	0	0	5.7e-05	0.48	0.11	-0.02	G	A	0.26	http://www.ncbi.nlm.nih.gov/sites/entrez?Db=gene&Cmd=ShowDetailView&TermToSearch=84226&ordinalpos=1&itool=EntrezSystem2.PEntrez.Gene.Gene_ResultsPanel.Gene_RVDocSum	C2orf16	C2orf16	0	http://www.ncbi.nlm.nih.gov/sites/entrez?Db=gene&Cmd=ShowDetailView&TermToSearch=84450&ordinalpos=1&itool=EntrezSystem2.PEntrez.Gene.Gene_ResultsPanel.Gene_RVDocSum	ZNF512	ZNF512	4	http://www.ncbi.nlm.nih.gov/sites/entrez?Db=gene&Cmd=ShowDetailView&TermToSearch=79635&ordinalpos=1&itool=EntrezSystem2.PEntrez.Gene.Gene_ResultsPanel.Gene_RVDocSum	FLJ13646	FLJ13646	47	2.5	2.4	0.2	-0.3	7.8e-05	0.056	0.57	-0.6	-0.4	-0.3	-0.1	0.46	0.31	0.19
http://www.ensembl.org/Homo_sapiens/Variation/Summary?v=rs12478841	rs12478841	rs12478841	2	0.97	0.03	0	0	5.7e-05	0.49	0.11	-0.02	G	A	0.26	http://www.ncbi.nlm.nih.gov/sites/entrez?Db=gene&Cmd=ShowDetailView&TermToSearch=84450&ordinalpos=1&itool=EntrezSystem2.PEntrez.Gene.Gene_ResultsPanel.Gene_RVDocSum	ZNF512	ZNF512	0	http://www.ncbi.nlm.nih.gov/sites/entrez?Db=gene&Cmd=ShowDetailView&TermToSearch=84226&ordinalpos=1&itool=EntrezSystem2.PEntrez.Gene.Gene_ResultsPanel.Gene_RVDocSum	C2orf16	C2orf16	6	http://www.ncbi.nlm.nih.gov/sites/entrez?Db=gene&Cmd=ShowDetailView&TermToSearch=79635&ordinalpos=1&itool=EntrezSystem2.PEntrez.Gene.Gene_ResultsPanel.Gene_RVDocSum	FLJ13646	FLJ13646	37	2.5	2.5	0.2	-0.3	7.7e-05	0.058	0.59	-0.6	-0.4	-0.3	-0.1	0.46	0.3	0.19
http://www.ensembl.org/Homo_sapiens/Variation/Summary?v=rs6760250	rs6760250	rs6760250	2	0.97	0.03	0	0	5.9e-05	0.5	0.11	-0.02	A	G	0.26	http://www.ncbi.nlm.nih.gov/sites/entrez?Db=gene&Cmd=ShowDetailView&TermToSearch=84450&ordinalpos=1&itool=EntrezSystem2.PEntrez.Gene.Gene_ResultsPanel.Gene_RVDocSum	ZNF512	ZNF512	0	http://www.ncbi.nlm.nih.gov/sites/entrez?Db=gene&Cmd=ShowDetailView&TermToSearch=84226&ordinalpos=1&itool=EntrezSystem2.PEntrez.Gene.Gene_ResultsPanel.Gene_RVDocSum	C2orf16	C2orf16	7	http://www.ncbi.nlm.nih.gov/sites/entrez?Db=gene&Cmd=ShowDetailView&TermToSearch=79635&ordinalpos=1&itool=EntrezSystem2.PEntrez.Gene.Gene_ResultsPanel.Gene_RVDocSum	FLJ13646	FLJ13646	36	2.5	2.4	0.1	-0.3	8e-05	0.06	0.59	-0.6	-0.4	-0.3	-0.1	0.46	0.3	0.19
http://www.ensembl.org/Homo_sapiens/Variation/Summary?v=rs13022873	rs13022873	rs13022873	2	0.97	0.03	0	0	5.9e-05	0.5	0.11	-0.02	C	A	0.26	http://www.ncbi.nlm.nih.gov/sites/entrez?Db=gene&Cmd=ShowDetailView&TermToSearch=84450&ordinalpos=1&itool=EntrezSystem2.PEntrez.Gene.Gene_ResultsPanel.Gene_RVDocSum	ZNF512	ZNF512	0	http://www.ncbi.nlm.nih.gov/sites/entrez?Db=gene&Cmd=ShowDetailView&TermToSearch=84226&ordinalpos=1&itool=EntrezSystem2.PEntrez.Gene.Gene_ResultsPanel.Gene_RVDocSum	C2orf16	C2orf16	10	http://www.ncbi.nlm.nih.gov/sites/entrez?Db=gene&Cmd=ShowDetailView&TermToSearch=79635&ordinalpos=1&itool=EntrezSystem2.PEntrez.Gene.Gene_ResultsPanel.Gene_RVDocSum	FLJ13646	FLJ13646	33	2.5	2.4	0.1	-0.3	8e-05	0.06	0.58	-0.6	-0.4	-0.3	-0.1	0.46	0.3	0.2
http://www.ensembl.org/Homo_sapiens/Variation/Summary?v=rs12467476	rs12467476	rs12467476	2	0.97	0.03	0	0	5.8e-05	0.5	0.11	-0.02	C	T	0.26	http://www.ncbi.nlm.nih.gov/sites/entrez?Db=gene&Cmd=ShowDetailView&TermToSearch=84450&ordinalpos=1&itool=EntrezSystem2.PEntrez.Gene.Gene_ResultsPanel.Gene_RVDocSum	ZNF512	ZNF512	0	http://www.ncbi.nlm.nih.gov/sites/entrez?Db=gene&Cmd=ShowDetailView&TermToSearch=84226&ordinalpos=1&itool=EntrezSystem2.PEntrez.Gene.Gene_ResultsPanel.Gene_RVDocSum	C2orf16	C2orf16	20	http://www.ncbi.nlm.nih.gov/sites/entrez?Db=gene&Cmd=ShowDetailView&TermToSearch=79635&ordinalpos=1&itool=EntrezSystem2.PEntrez.Gene.Gene_ResultsPanel.Gene_RVDocSum	FLJ13646	FLJ13646	23	2.5	2.4	0.1	-0.3	7.9e-05	0.06	0.58	-0.6	-0.4	-0.3	-0.1	0.46	0.3	0.2
http://www.ensembl.org/Homo_sapiens/Variation/Summary?v=rs2384656	rs2384656	rs2384656	2	0.96	0.04	0	0	3.8e-05	0.55	0.11	-0.02	G	A	0.27	http://www.ncbi.nlm.nih.gov/sites/entrez?Db=gene&Cmd=ShowDetailView&TermToSearch=84450&ordinalpos=1&itool=EntrezSystem2.PEntrez.Gene.Gene_ResultsPanel.Gene_RVDocSum	ZNF512	ZNF512	0	http://www.ncbi.nlm.nih.gov/sites/entrez?Db=gene&Cmd=ShowDetailView&TermToSearch=79635&ordinalpos=1&itool=EntrezSystem2.PEntrez.Gene.Gene_ResultsPanel.Gene_RVDocSum	FLJ13646	FLJ13646	16	http://www.ncbi.nlm.nih.gov/sites/entrez?Db=gene&Cmd=ShowDetailView&TermToSearch=11321&ordinalpos=1&itool=EntrezSystem2.PEntrez.Gene.Gene_ResultsPanel.Gene_RVDocSum	XAB1	XAB1	20	2.7	2.5	0.1	-0.3	6.9e-05	0.066	0.54	-0.6	-0.5	-0.2	-0.1	0.45	0.27	0.22
http://www.ensembl.org/Homo_sapiens/Variation/Summary?v=rs4666000	rs4666000	rs4666000	2	0.95	0.05	0	0	3e-05	0.63	0.1	-0.01	C	T	0.29	http://www.ncbi.nlm.nih.gov/sites/entrez?Db=gene&Cmd=ShowDetailView&TermToSearch=84450&ordinalpos=1&itool=EntrezSystem2.PEntrez.Gene.Gene_ResultsPanel.Gene_RVDocSum	ZNF512	ZNF512	0	http://www.ncbi.nlm.nih.gov/sites/entrez?Db=gene&Cmd=ShowDetailView&TermToSearch=79635&ordinalpos=1&itool=EntrezSystem2.PEntrez.Gene.Gene_ResultsPanel.Gene_RVDocSum	FLJ13646	FLJ13646	9	http://www.ncbi.nlm.nih.gov/sites/entrez?Db=gene&Cmd=ShowDetailView&TermToSearch=11321&ordinalpos=1&itool=EntrezSystem2.PEntrez.Gene.Gene_ResultsPanel.Gene_RVDocSum	XAB1	XAB1	13	2.8	2.8	0.1	-0.3	3.6e-05	0.088	0.53	-0.7	-0.4	-0.1	-0.2	0.32	0.15	0.35
http://www.ensembl.org/Homo_sapiens/Variation/Summary?v=rs2068834	rs2068834	rs2068834	2	0.95	0.05	0	0	3e-05	0.66	0.1	-0.01	C	T	0.3	http://www.ncbi.nlm.nih.gov/sites/entrez?Db=gene&Cmd=ShowDetailView&TermToSearch=84450&ordinalpos=1&itool=EntrezSystem2.PEntrez.Gene.Gene_ResultsPanel.Gene_RVDocSum	ZNF512	ZNF512	0	http://www.ncbi.nlm.nih.gov/sites/entrez?Db=gene&Cmd=ShowDetailView&TermToSearch=79635&ordinalpos=1&itool=EntrezSystem2.PEntrez.Gene.Gene_ResultsPanel.Gene_RVDocSum	FLJ13646	FLJ13646	9	http://www.ncbi.nlm.nih.gov/sites/entrez?Db=gene&Cmd=ShowDetailView&TermToSearch=11321&ordinalpos=1&itool=EntrezSystem2.PEntrez.Gene.Gene_ResultsPanel.Gene_RVDocSum	XAB1	XAB1	12	2.7	2.8	0	-0.3	3.1e-05	0.095	0.56	-0.7	-0.3	-0.1	-0.2	0.3	0.15	0.36
http://www.ensembl.org/Homo_sapiens/Variation/Summary?v=rs4666002	rs4666002	rs4666002	2	0.96	0.04	0	0	4.2e-05	0.54	0.1	-0.02	C	G	0.28	http://www.ncbi.nlm.nih.gov/sites/entrez?Db=gene&Cmd=ShowDetailView&TermToSearch=84450&ordinalpos=1&itool=EntrezSystem2.PEntrez.Gene.Gene_ResultsPanel.Gene_RVDocSum	ZNF512	ZNF512	0	http://www.ncbi.nlm.nih.gov/sites/entrez?Db=gene&Cmd=ShowDetailView&TermToSearch=79635&ordinalpos=1&itool=EntrezSystem2.PEntrez.Gene.Gene_ResultsPanel.Gene_RVDocSum	FLJ13646	FLJ13646	8	http://www.ncbi.nlm.nih.gov/sites/entrez?Db=gene&Cmd=ShowDetailView&TermToSearch=11321&ordinalpos=1&itool=EntrezSystem2.PEntrez.Gene.Gene_ResultsPanel.Gene_RVDocSum	XAB1	XAB1	11	2.6	2.4	0.1	-0.3	8.2e-05	0.073	0.53	-0.6	-0.5	-0.2	-0.2	0.46	0.24	0.25
http://www.ensembl.org/Homo_sapiens/Variation/Summary?v=rs3749147	rs3749147	rs3749147	2	0.9	0.1	0	0	1.5e-05	0.58	0.12	-0.02	A	G	0.25	http://www.ncbi.nlm.nih.gov/sites/entrez?Db=gene&Cmd=ShowDetailView&TermToSearch=11321&ordinalpos=1&itool=EntrezSystem2.PEntrez.Gene.Gene_ResultsPanel.Gene_RVDocSum	XAB1	XAB1	0	http://www.ncbi.nlm.nih.gov/sites/entrez?Db=gene&Cmd=ShowDetailView&TermToSearch=79635&ordinalpos=1&itool=EntrezSystem2.PEntrez.Gene.Gene_ResultsPanel.Gene_RVDocSum	FLJ13646	FLJ13646	0	http://www.ncbi.nlm.nih.gov/sites/entrez?Db=gene&Cmd=ShowDetailView&TermToSearch=84450&ordinalpos=1&itool=EntrezSystem2.PEntrez.Gene.Gene_ResultsPanel.Gene_RVDocSum	ZNF512	ZNF512	6	3.1	2.4	0.2	-0.2	8.5e-05	0.053	0.42	-0.6	-0.5	-0.1	-0.1	0.54	0.21	0.3
http://www.ensembl.org/Homo_sapiens/Variation/Summary?v=rs13002853	rs13002853	rs13002853	2	0.9	0.1	0	0	1.5e-05	0.58	0.12	-0.02	G	C	0.25	http://www.ncbi.nlm.nih.gov/sites/entrez?Db=gene&Cmd=ShowDetailView&TermToSearch=11321&ordinalpos=1&itool=EntrezSystem2.PEntrez.Gene.Gene_ResultsPanel.Gene_RVDocSum	XAB1	XAB1	0	http://www.ncbi.nlm.nih.gov/sites/entrez?Db=gene&Cmd=ShowDetailView&TermToSearch=79635&ordinalpos=1&itool=EntrezSystem2.PEntrez.Gene.Gene_ResultsPanel.Gene_RVDocSum	FLJ13646	FLJ13646	1	http://www.ncbi.nlm.nih.gov/sites/entrez?Db=gene&Cmd=ShowDetailView&TermToSearch=84450&ordinalpos=1&itool=EntrezSystem2.PEntrez.Gene.Gene_ResultsPanel.Gene_RVDocSum	ZNF512	ZNF512	7	3.1	2.4	0.2	-0.2	8.6e-05	0.053	0.42	-0.6	-0.5	-0.1	-0.1	0.54	0.21	0.3
http://www.ensembl.org/Homo_sapiens/Variation/Summary?v=rs2272406	rs2272406	rs2272406	2	0.97	0.03	0	0	7.7e-05	0.38	0.11	-0.02	T	A	0.22	http://www.ncbi.nlm.nih.gov/sites/entrez?Db=gene&Cmd=ShowDetailView&TermToSearch=22950&ordinalpos=1&itool=EntrezSystem2.PEntrez.Gene.Gene_ResultsPanel.Gene_RVDocSum	SLC4A1AP	SLC4A1AP	0	http://www.ncbi.nlm.nih.gov/sites/entrez?Db=gene&Cmd=ShowDetailView&TermToSearch=9913&ordinalpos=1&itool=EntrezSystem2.PEntrez.Gene.Gene_ResultsPanel.Gene_RVDocSum	SUPT7L	SUPT7L	6	http://www.ncbi.nlm.nih.gov/sites/entrez?Db=gene&Cmd=ShowDetailView&TermToSearch=11321&ordinalpos=1&itool=EntrezSystem2.PEntrez.Gene.Gene_ResultsPanel.Gene_RVDocSum	XAB1	XAB1	18	2.5	1.5	0.4	-0.2	0.0014	0.03	0.29	-0.5	-0.5	-0.2	-0.3	1	0.23	0.59
http://www.ensembl.org/Homo_sapiens/Variation/Summary?v=rs13023094	rs13023094	rs13023094	2	0.98	0.02	0	0	0.00013	0.38	0.11	-0.02	C	A	0.22	http://www.ncbi.nlm.nih.gov/sites/entrez?Db=gene&Cmd=ShowDetailView&TermToSearch=22950&ordinalpos=1&itool=EntrezSystem2.PEntrez.Gene.Gene_ResultsPanel.Gene_RVDocSum	SLC4A1AP	SLC4A1AP	0	http://www.ncbi.nlm.nih.gov/sites/entrez?Db=gene&Cmd=ShowDetailView&TermToSearch=9913&ordinalpos=1&itool=EntrezSystem2.PEntrez.Gene.Gene_ResultsPanel.Gene_RVDocSum	SUPT7L	SUPT7L	24	http://www.ncbi.nlm.nih.gov/sites/entrez?Db=gene&Cmd=ShowDetailView&TermToSearch=11321&ordinalpos=1&itool=EntrezSystem2.PEntrez.Gene.Gene_ResultsPanel.Gene_RVDocSum	XAB1	XAB1	37	2.4	1.4	0.3	-0.2	0.0021	0.033	0.32	-0.5	-0.5	-0.2	-0.3	0.98	0.23	0.57
http://www.ensembl.org/Homo_sapiens/Variation/Summary?v=rs13030973	rs13030973	rs13030973	2	0.98	0.02	0	0	0.00015	0.22	0.11	-0.03	C	T	0.22	http://www.ncbi.nlm.nih.gov/sites/entrez?Db=gene&Cmd=ShowDetailView&TermToSearch=22950&ordinalpos=1&itool=EntrezSystem2.PEntrez.Gene.Gene_ResultsPanel.Gene_RVDocSum	SLC4A1AP	SLC4A1AP	11	http://www.ncbi.nlm.nih.gov/sites/entrez?Db=gene&Cmd=ShowDetailView&TermToSearch=729833&ordinalpos=1&itool=EntrezSystem2.PEntrez.Gene.Gene_ResultsPanel.Gene_RVDocSum	LOC729833	LOC729833	29	http://www.ncbi.nlm.nih.gov/sites/entrez?Db=gene&Cmd=ShowDetailView&TermToSearch=9913&ordinalpos=1&itool=EntrezSystem2.PEntrez.Gene.Gene_ResultsPanel.Gene_RVDocSum	SUPT7L	SUPT7L	42	2.3	1.4	0.4	-0.3	0.0021	0.024	0.44	-0.4	-0.5	-0.1	-0.2	0.94	0.17	0.38
http://www.ensembl.org/Homo_sapiens/Variation/Summary?v=rs6727388	rs6727388	rs6727388	2	0.98	0.02	0	0	0.00015	0.24	0.11	-0.03	G	A	0.22	http://www.ncbi.nlm.nih.gov/sites/entrez?Db=gene&Cmd=ShowDetailView&TermToSearch=22950&ordinalpos=1&itool=EntrezSystem2.PEntrez.Gene.Gene_ResultsPanel.Gene_RVDocSum	SLC4A1AP	SLC4A1AP	15	http://www.ncbi.nlm.nih.gov/sites/entrez?Db=gene&Cmd=ShowDetailView&TermToSearch=729833&ordinalpos=1&itool=EntrezSystem2.PEntrez.Gene.Gene_ResultsPanel.Gene_RVDocSum	LOC729833	LOC729833	26	http://www.ncbi.nlm.nih.gov/sites/entrez?Db=gene&Cmd=ShowDetailView&TermToSearch=9913&ordinalpos=1&itool=EntrezSystem2.PEntrez.Gene.Gene_ResultsPanel.Gene_RVDocSum	SUPT7L	SUPT7L	46	2.3	1.4	0.4	-0.2	0.002	0.026	0.42	-0.4	-0.5	-0.1	-0.2	0.95	0.19	0.4
http://www.ensembl.org/Homo_sapiens/Variation/Summary?v=rs4616435	rs4616435	rs4616435	2	0.98	0.02	0	0	0.00015	0.25	0.11	-0.03	T	C	0.22	http://www.ncbi.nlm.nih.gov/sites/entrez?Db=gene&Cmd=ShowDetailView&TermToSearch=22950&ordinalpos=1&itool=EntrezSystem2.PEntrez.Gene.Gene_ResultsPanel.Gene_RVDocSum	SLC4A1AP	SLC4A1AP	16	http://www.ncbi.nlm.nih.gov/sites/entrez?Db=gene&Cmd=ShowDetailView&TermToSearch=729833&ordinalpos=1&itool=EntrezSystem2.PEntrez.Gene.Gene_ResultsPanel.Gene_RVDocSum	LOC729833	LOC729833	24	http://www.ncbi.nlm.nih.gov/sites/entrez?Db=gene&Cmd=ShowDetailView&TermToSearch=9913&ordinalpos=1&itool=EntrezSystem2.PEntrez.Gene.Gene_ResultsPanel.Gene_RVDocSum	SUPT7L	SUPT7L	47	2.3	1.4	0.4	-0.2	0.002	0.026	0.42	-0.4	-0.5	-0.1	-0.2	0.95	0.19	0.4
http://www.ensembl.org/Homo_sapiens/Variation/Summary?v=rs6727215	rs6727215	rs6727215	2	0.98	0.02	0	0	0.00014	0.25	0.11	-0.03	A	G	0.22	http://www.ncbi.nlm.nih.gov/sites/entrez?Db=gene&Cmd=ShowDetailView&TermToSearch=22950&ordinalpos=1&itool=EntrezSystem2.PEntrez.Gene.Gene_ResultsPanel.Gene_RVDocSum	SLC4A1AP	SLC4A1AP	17	http://www.ncbi.nlm.nih.gov/sites/entrez?Db=gene&Cmd=ShowDetailView&TermToSearch=729833&ordinalpos=1&itool=EntrezSystem2.PEntrez.Gene.Gene_ResultsPanel.Gene_RVDocSum	LOC729833	LOC729833	23	http://www.ncbi.nlm.nih.gov/sites/entrez?Db=gene&Cmd=ShowDetailView&TermToSearch=9913&ordinalpos=1&itool=EntrezSystem2.PEntrez.Gene.Gene_ResultsPanel.Gene_RVDocSum	SUPT7L	SUPT7L	48	2.3	1.4	0.4	-0.2	0.002	0.025	0.42	-0.4	-0.5	-0.1	-0.2	0.95	0.19	0.4
http://www.ensembl.org/Homo_sapiens/Variation/Summary?v=rs13023194	rs13023194	rs13023194	2	0.91	0.09	0	0	1.7e-05	0.44	0.14	-0.03	C	G	0.17	http://www.ncbi.nlm.nih.gov/sites/entrez?Db=gene&Cmd=ShowDetailView&TermToSearch=729833&ordinalpos=1&itool=EntrezSystem2.PEntrez.Gene.Gene_ResultsPanel.Gene_RVDocSum	LOC729833	LOC729833	0	http://www.ncbi.nlm.nih.gov/sites/entrez?Db=gene&Cmd=ShowDetailView&TermToSearch=9553&ordinalpos=1&itool=EntrezSystem2.PEntrez.Gene.Gene_ResultsPanel.Gene_RVDocSum	MRPL33	MRPL33	27	http://www.ncbi.nlm.nih.gov/sites/entrez?Db=gene&Cmd=ShowDetailView&TermToSearch=64080&ordinalpos=1&itool=EntrezSystem2.PEntrez.Gene.Gene_ResultsPanel.Gene_RVDocSum	RBKS	RBKS	37	3	1.9	0.4	-0.1	0.00044	0.026	0.22	-0.5	-0.5	-0.3	-0.2	0.8	0.6	0.45
http://www.ensembl.org/Homo_sapiens/Variation/Summary?v=rs13030345	rs13030345	rs13030345	2	0.91	0.08	0	0	1.6e-05	0.5	0.15	-0.02	T	G	0.16	http://www.ncbi.nlm.nih.gov/sites/entrez?Db=gene&Cmd=ShowDetailView&TermToSearch=9553&ordinalpos=1&itool=EntrezSystem2.PEntrez.Gene.Gene_ResultsPanel.Gene_RVDocSum	MRPL33	MRPL33	1	http://www.ncbi.nlm.nih.gov/sites/entrez?Db=gene&Cmd=ShowDetailView&TermToSearch=64080&ordinalpos=1&itool=EntrezSystem2.PEntrez.Gene.Gene_ResultsPanel.Gene_RVDocSum	RBKS	RBKS	1	http://www.ncbi.nlm.nih.gov/sites/entrez?Db=gene&Cmd=ShowDetailView&TermToSearch=729833&ordinalpos=1&itool=EntrezSystem2.PEntrez.Gene.Gene_ResultsPanel.Gene_RVDocSum	LOC729833	LOC729833	14	3	1.9	0.4	0	0.00041	0.027	0.19	-0.5	-0.4	-0.3	-0.2	0.77	0.74	0.48
http://www.ensembl.org/Homo_sapiens/Variation/Summary?v=rs937813	rs937813	rs937813	2	0.99	0.01	0	0	0.00015	0.26	0.19	-0.06	C	T	0.1	http://www.ncbi.nlm.nih.gov/sites/entrez?Db=gene&Cmd=ShowDetailView&TermToSearch=9577&ordinalpos=1&itool=EntrezSystem2.PEntrez.Gene.Gene_ResultsPanel.Gene_RVDocSum	BRE	BRE	0	http://www.ncbi.nlm.nih.gov/sites/entrez?Db=gene&Cmd=ShowDetailView&TermToSearch=728408&ordinalpos=1&itool=EntrezSystem2.PEntrez.Gene.Gene_ResultsPanel.Gene_RVDocSum	LOC728408	LOC728408	62	http://www.ncbi.nlm.nih.gov/sites/entrez?Db=gene&Cmd=ShowDetailView&TermToSearch=64080&ordinalpos=1&itool=EntrezSystem2.PEntrez.Gene.Gene_ResultsPanel.Gene_RVDocSum	RBKS	RBKS	188	2.1	0.9	0.3	0.1	0.0053	0.037	0.13	-0.2	-0.3	-0.2	0.1	0.57	0.79	0.13
http://www.ensembl.org/Homo_sapiens/Variation/Summary?v=rs17540621	rs17540621	rs17540621	2	0.75	0.24	0	0.01	1.8e-06	0.69	-0.35	-0.03	C	G	0.06	http://www.ncbi.nlm.nih.gov/sites/entrez?Db=gene&Cmd=ShowDetailView&TermToSearch=57217&ordinalpos=1&itool=EntrezSystem2.PEntrez.Gene.Gene_ResultsPanel.Gene_RVDocSum	TTC7A	TTC7A	0	http://www.ncbi.nlm.nih.gov/sites/entrez?Db=gene&Cmd=ShowDetailView&TermToSearch=90411&ordinalpos=1&itool=EntrezSystem2.PEntrez.Gene.Gene_ResultsPanel.Gene_RVDocSum	MCFD2	MCFD2	87	http://www.ncbi.nlm.nih.gov/sites/entrez?Db=gene&Cmd=ShowDetailView&TermToSearch=285051&ordinalpos=1&itool=EntrezSystem2.PEntrez.Gene.Gene_ResultsPanel.Gene_RVDocSum	FLJ40172	FLJ40172	126	3.6	0.2	1.1	0.9	0.043	0.0014	0.0024	-0.3	-0.1	-0.2	-0.1	0.43	0.8	0.72
http://www.ensembl.org/Homo_sapiens/Variation/Summary?v=rs10193261	rs10193261	rs10193261	2	0.94	0.05	0	0	1.7e-05	0.63	-0.29	-0.03	T	G	0.05	http://www.ncbi.nlm.nih.gov/sites/entrez?Db=gene&Cmd=ShowDetailView&TermToSearch=57217&ordinalpos=1&itool=EntrezSystem2.PEntrez.Gene.Gene_ResultsPanel.Gene_RVDocSum	TTC7A	TTC7A	0	http://www.ncbi.nlm.nih.gov/sites/entrez?Db=gene&Cmd=ShowDetailView&TermToSearch=90411&ordinalpos=1&itool=EntrezSystem2.PEntrez.Gene.Gene_ResultsPanel.Gene_RVDocSum	MCFD2	MCFD2	96	http://www.ncbi.nlm.nih.gov/sites/entrez?Db=gene&Cmd=ShowDetailView&TermToSearch=285051&ordinalpos=1&itool=EntrezSystem2.PEntrez.Gene.Gene_ResultsPanel.Gene_RVDocSum	FLJ40172	FLJ40172	116	2.8	0.1	1	0.5	0.074	0.0025	0.011	-0.3	-0.1	-0.2	-0.1	0.4	0.73	0.49
http://www.ensembl.org/Homo_sapiens/Variation/Summary?v=rs10194115	rs10194115	rs10194115	2	0.88	0.12	0	0.01	5.2e-06	0.65	-0.34	-0.03	T	G	0.05	http://www.ncbi.nlm.nih.gov/sites/entrez?Db=gene&Cmd=ShowDetailView&TermToSearch=57217&ordinalpos=1&itool=EntrezSystem2.PEntrez.Gene.Gene_ResultsPanel.Gene_RVDocSum	TTC7A	TTC7A	0	http://www.ncbi.nlm.nih.gov/sites/entrez?Db=gene&Cmd=ShowDetailView&TermToSearch=90411&ordinalpos=1&itool=EntrezSystem2.PEntrez.Gene.Gene_ResultsPanel.Gene_RVDocSum	MCFD2	MCFD2	97	http://www.ncbi.nlm.nih.gov/sites/entrez?Db=gene&Cmd=ShowDetailView&TermToSearch=285051&ordinalpos=1&itool=EntrezSystem2.PEntrez.Gene.Gene_ResultsPanel.Gene_RVDocSum	FLJ40172	FLJ40172	116	3.2	0.1	1.1	0.8	0.085	0.0015	0.0034	-0.3	-0.1	-0.2	-0.1	0.38	0.69	0.53
http://www.ensembl.org/Homo_sapiens/Variation/Summary?v=rs10196993	rs10196993	rs10196993	2	0.88	0.11	0	0.01	5.5e-06	0.61	-0.35	-0.04	C	G	0.05	http://www.ncbi.nlm.nih.gov/sites/entrez?Db=gene&Cmd=ShowDetailView&TermToSearch=57217&ordinalpos=1&itool=EntrezSystem2.PEntrez.Gene.Gene_ResultsPanel.Gene_RVDocSum	TTC7A	TTC7A	0	http://www.ncbi.nlm.nih.gov/sites/entrez?Db=gene&Cmd=ShowDetailView&TermToSearch=90411&ordinalpos=1&itool=EntrezSystem2.PEntrez.Gene.Gene_ResultsPanel.Gene_RVDocSum	MCFD2	MCFD2	98	http://www.ncbi.nlm.nih.gov/sites/entrez?Db=gene&Cmd=ShowDetailView&TermToSearch=285051&ordinalpos=1&itool=EntrezSystem2.PEntrez.Gene.Gene_ResultsPanel.Gene_RVDocSum	FLJ40172	FLJ40172	115	3.1	0.1	1.1	0.8	0.086	0.0016	0.0033	-0.3	-0.1	-0.2	-0.1	0.38	0.68	0.46
http://www.ensembl.org/Homo_sapiens/Variation/Summary?v=rs17045807	rs17045807	rs17045807	2	0.98	0.01	0	0	0.0001	0.94	-0.23	0	C	T	0.11	http://www.ncbi.nlm.nih.gov/sites/entrez?Db=gene&Cmd=ShowDetailView&TermToSearch=98&ordinalpos=1&itool=EntrezSystem2.PEntrez.Gene.Gene_ResultsPanel.Gene_RVDocSum	ACYP2	ACYP2	0	http://www.ncbi.nlm.nih.gov/sites/entrez?Db=gene&Cmd=ShowDetailView&TermToSearch=129852&ordinalpos=1&itool=EntrezSystem2.PEntrez.Gene.Gene_ResultsPanel.Gene_RVDocSum	FLJ40298	FLJ40298	26	http://www.ncbi.nlm.nih.gov/sites/entrez?Db=gene&Cmd=ShowDetailView&TermToSearch=388951&ordinalpos=1&itool=EntrezSystem2.PEntrez.Gene.Gene_ResultsPanel.Gene_RVDocSum	TSPYL6	TSPYL6	49	2.2	0.9	0.7	-0.1	0.0042	0.0086	0.42	-0.4	-0.2	-0.1	0	0.78	0.25	0.14
http://www.ensembl.org/Homo_sapiens/Variation/Summary?v=rs12711751	rs12711751	rs12711751	2	0.92	0.08	0	0	2e-05	0.26	0.11	-0.03	T	G	0.34	http://www.ncbi.nlm.nih.gov/sites/entrez?Db=gene&Cmd=ShowDetailView&TermToSearch=84639&ordinalpos=1&itool=EntrezSystem2.PEntrez.Gene.Gene_ResultsPanel.Gene_RVDocSum	IL1F10	IL1F10	4	http://www.ncbi.nlm.nih.gov/sites/entrez?Db=gene&Cmd=ShowDetailView&TermToSearch=26525&ordinalpos=1&itool=EntrezSystem2.PEntrez.Gene.Gene_ResultsPanel.Gene_RVDocSum	IL1F5	IL1F5	15	http://www.ncbi.nlm.nih.gov/sites/entrez?Db=gene&Cmd=ShowDetailView&TermToSearch=27177&ordinalpos=1&itool=EntrezSystem2.PEntrez.Gene.Gene_ResultsPanel.Gene_RVDocSum	IL1F8	IL1F8	27	3	1.7	0.1	0.3	0.00048	0.098	0.045	-0.4	-0.4	-0.3	0	0.32	0.78	0.15
http://www.ensembl.org/Homo_sapiens/Variation/Summary?v=rs10181720	rs10181720	rs10181720	2	0.95	0.05	0	0	3.8e-05	0.23	0.1	-0.03	A	G	0.34	http://www.ncbi.nlm.nih.gov/sites/entrez?Db=gene&Cmd=ShowDetailView&TermToSearch=84639&ordinalpos=1&itool=EntrezSystem2.PEntrez.Gene.Gene_ResultsPanel.Gene_RVDocSum	IL1F10	IL1F10	5	http://www.ncbi.nlm.nih.gov/sites/entrez?Db=gene&Cmd=ShowDetailView&TermToSearch=26525&ordinalpos=1&itool=EntrezSystem2.PEntrez.Gene.Gene_ResultsPanel.Gene_RVDocSum	IL1F5	IL1F5	16	http://www.ncbi.nlm.nih.gov/sites/entrez?Db=gene&Cmd=ShowDetailView&TermToSearch=27177&ordinalpos=1&itool=EntrezSystem2.PEntrez.Gene.Gene_ResultsPanel.Gene_RVDocSum	IL1F8	IL1F8	28	2.7	1.6	0	0.2	0.0007	0.12	0.051	-0.4	-0.4	-0.3	0	0.3	0.84	0.14
http://www.ensembl.org/Homo_sapiens/Variation/Summary?v=rs10184259	rs10184259	rs10184259	2	0.94	0.06	0	0	2.7e-05	0.22	0.1	-0.03	T	C	0.34	http://www.ncbi.nlm.nih.gov/sites/entrez?Db=gene&Cmd=ShowDetailView&TermToSearch=84639&ordinalpos=1&itool=EntrezSystem2.PEntrez.Gene.Gene_ResultsPanel.Gene_RVDocSum	IL1F10	IL1F10	5	http://www.ncbi.nlm.nih.gov/sites/entrez?Db=gene&Cmd=ShowDetailView&TermToSearch=26525&ordinalpos=1&itool=EntrezSystem2.PEntrez.Gene.Gene_ResultsPanel.Gene_RVDocSum	IL1F5	IL1F5	16	http://www.ncbi.nlm.nih.gov/sites/entrez?Db=gene&Cmd=ShowDetailView&TermToSearch=27177&ordinalpos=1&itool=EntrezSystem2.PEntrez.Gene.Gene_ResultsPanel.Gene_RVDocSum	IL1F8	IL1F8	28	2.9	1.7	0.1	0.2	0.00049	0.1	0.062	-0.4	-0.4	-0.3	0.1	0.29	0.81	0.12
http://www.ensembl.org/Homo_sapiens/Variation/Summary?v=rs10169599	rs10169599	rs10169599	2	0.94	0.06	0	0	2.8e-05	0.24	0.11	-0.03	C	T	0.34	http://www.ncbi.nlm.nih.gov/sites/entrez?Db=gene&Cmd=ShowDetailView&TermToSearch=84639&ordinalpos=1&itool=EntrezSystem2.PEntrez.Gene.Gene_ResultsPanel.Gene_RVDocSum	IL1F10	IL1F10	5	http://www.ncbi.nlm.nih.gov/sites/entrez?Db=gene&Cmd=ShowDetailView&TermToSearch=26525&ordinalpos=1&itool=EntrezSystem2.PEntrez.Gene.Gene_ResultsPanel.Gene_RVDocSum	IL1F5	IL1F5	16	http://www.ncbi.nlm.nih.gov/sites/entrez?Db=gene&Cmd=ShowDetailView&TermToSearch=27177&ordinalpos=1&itool=EntrezSystem2.PEntrez.Gene.Gene_ResultsPanel.Gene_RVDocSum	IL1F8	IL1F8	28	2.9	1.7	0	0.2	0.00048	0.12	0.055	-0.4	-0.4	-0.3	0	0.31	0.83	0.15
http://www.ensembl.org/Homo_sapiens/Variation/Summary?v=rs11673900	rs11673900	rs11673900	2	0.95	0	0	0.04	0.03	5.5e-06	-0.07	-0.16	T	G	0.17	http://www.ncbi.nlm.nih.gov/sites/entrez?Db=gene&Cmd=ShowDetailView&TermToSearch=51141&ordinalpos=1&itool=EntrezSystem2.PEntrez.Gene.Gene_ResultsPanel.Gene_RVDocSum	INSIG2	INSIG2	9	http://www.ncbi.nlm.nih.gov/sites/entrez?Db=gene&Cmd=ShowDetailView&TermToSearch=645733&ordinalpos=1&itool=EntrezSystem2.PEntrez.Gene.Gene_ResultsPanel.Gene_RVDocSum	LOC645733	LOC645733	64	http://www.ncbi.nlm.nih.gov/sites/entrez?Db=gene&Cmd=ShowDetailView&TermToSearch=54520&ordinalpos=1&itool=EntrezSystem2.PEntrez.Gene.Gene_ResultsPanel.Gene_RVDocSum	CCDC93	CCDC93	104	0.3	1.3	-0.4	-0.2	0.0019	0.96	0.89	3.4	2.3	0.6	-0.1	9.5e-05	0.016	0.36
http://www.ensembl.org/Homo_sapiens/Variation/Summary?v=rs11691507	rs11691507	rs11691507	2	0.99	0	0	0.01	0.026	2.8e-05	-0.09	-0.16	T	C	0.15	http://www.ncbi.nlm.nih.gov/sites/entrez?Db=gene&Cmd=ShowDetailView&TermToSearch=51141&ordinalpos=1&itool=EntrezSystem2.PEntrez.Gene.Gene_ResultsPanel.Gene_RVDocSum	INSIG2	INSIG2	12	http://www.ncbi.nlm.nih.gov/sites/entrez?Db=gene&Cmd=ShowDetailView&TermToSearch=645733&ordinalpos=1&itool=EntrezSystem2.PEntrez.Gene.Gene_ResultsPanel.Gene_RVDocSum	LOC645733	LOC645733	61	http://www.ncbi.nlm.nih.gov/sites/entrez?Db=gene&Cmd=ShowDetailView&TermToSearch=54520&ordinalpos=1&itool=EntrezSystem2.PEntrez.Gene.Gene_ResultsPanel.Gene_RVDocSum	CCDC93	CCDC93	108	0.4	1	-0.3	-0.2	0.0047	0.63	0.8	2.8	2.1	0.3	-0.2	0.00015	0.037	0.52
http://www.ensembl.org/Homo_sapiens/Variation/Summary?v=rs1453680	rs1453680	rs1453680	2	0.97	0.01	0	0.01	0.00024	0.0043	0.1	-0.08	A	G	0.24	http://www.ncbi.nlm.nih.gov/sites/entrez?Db=gene&Cmd=ShowDetailView&TermToSearch=728241&ordinalpos=1&itool=EntrezSystem2.PEntrez.Gene.Gene_ResultsPanel.Gene_RVDocSum	LOC728241	LOC728241	219	http://www.ncbi.nlm.nih.gov/sites/entrez?Db=gene&Cmd=ShowDetailView&TermToSearch=646179&ordinalpos=1&itool=EntrezSystem2.PEntrez.Gene.Gene_ResultsPanel.Gene_RVDocSum	LOC646179	LOC646179	628	http://www.ncbi.nlm.nih.gov/sites/entrez?Db=gene&Cmd=ShowDetailView&TermToSearch=7247&ordinalpos=1&itool=EntrezSystem2.PEntrez.Gene.Gene_ResultsPanel.Gene_RVDocSum	TSN	TSN	656	2.2	2.1	-0.3	-0.1	0.00023	0.37	0.21	1	-0.2	1.4	-0.3	0.24	0.0012	0.65
http://www.ensembl.org/Homo_sapiens/Variation/Summary?v=rs12474938	rs12474938	rs12474938	2	0.98	0.01	0	0.01	0.00037	0.0055	0.1	-0.08	T	G	0.24	http://www.ncbi.nlm.nih.gov/sites/entrez?Db=gene&Cmd=ShowDetailView&TermToSearch=728241&ordinalpos=1&itool=EntrezSystem2.PEntrez.Gene.Gene_ResultsPanel.Gene_RVDocSum	LOC728241	LOC728241	220	http://www.ncbi.nlm.nih.gov/sites/entrez?Db=gene&Cmd=ShowDetailView&TermToSearch=646179&ordinalpos=1&itool=EntrezSystem2.PEntrez.Gene.Gene_ResultsPanel.Gene_RVDocSum	LOC646179	LOC646179	628	http://www.ncbi.nlm.nih.gov/sites/entrez?Db=gene&Cmd=ShowDetailView&TermToSearch=7247&ordinalpos=1&itool=EntrezSystem2.PEntrez.Gene.Gene_ResultsPanel.Gene_RVDocSum	TSN	TSN	657	2	1.8	-0.3	-0.1	0.00049	0.35	0.22	1	-0.1	1.3	-0.3	0.25	0.0014	0.64
http://www.ensembl.org/Homo_sapiens/Variation/Summary?v=rs1406750	rs1406750	rs1406750	2	0.98	0.01	0	0.01	0.00034	0.0063	0.1	-0.08	G	A	0.24	http://www.ncbi.nlm.nih.gov/sites/entrez?Db=gene&Cmd=ShowDetailView&TermToSearch=728241&ordinalpos=1&itool=EntrezSystem2.PEntrez.Gene.Gene_ResultsPanel.Gene_RVDocSum	LOC728241	LOC728241	223	http://www.ncbi.nlm.nih.gov/sites/entrez?Db=gene&Cmd=ShowDetailView&TermToSearch=646179&ordinalpos=1&itool=EntrezSystem2.PEntrez.Gene.Gene_ResultsPanel.Gene_RVDocSum	LOC646179	LOC646179	631	http://www.ncbi.nlm.nih.gov/sites/entrez?Db=gene&Cmd=ShowDetailView&TermToSearch=7247&ordinalpos=1&itool=EntrezSystem2.PEntrez.Gene.Gene_ResultsPanel.Gene_RVDocSum	TSN	TSN	660	2	1.8	-0.3	-0.1	0.00049	0.33	0.2	1	-0.1	1.3	-0.3	0.25	0.0018	0.68
http://www.ensembl.org/Homo_sapiens/Variation/Summary?v=rs3755227	rs3755227	rs3755227	2	0.99	0.01	0	0	0.00017	0.67	0.17	0.02	C	T	0.14	http://www.ncbi.nlm.nih.gov/sites/entrez?Db=gene&Cmd=ShowDetailView&TermToSearch=2825&ordinalpos=1&itool=EntrezSystem2.PEntrez.Gene.Gene_ResultsPanel.Gene_RVDocSum	GPR1	GPR1	0	http://www.ncbi.nlm.nih.gov/sites/entrez?Db=gene&Cmd=ShowDetailView&TermToSearch=1933&ordinalpos=1&itool=EntrezSystem2.PEntrez.Gene.Gene_ResultsPanel.Gene_RVDocSum	EEF1B2	EEF1B2	14	http://www.ncbi.nlm.nih.gov/sites/entrez?Db=gene&Cmd=ShowDetailView&TermToSearch=619569&ordinalpos=1&itool=EntrezSystem2.PEntrez.Gene.Gene_ResultsPanel.Gene_RVDocSum	SNORA41	SNORA41	15	2.1	0.9	1.6	-0.2	0.005	0.00073	0.68	-0.4	-0.3	-0.3	-0.1	0.8	0.93	0.25
http://www.ensembl.org/Homo_sapiens/Variation/Summary?v=rs2139939	rs2139939	rs2139939	2	0.98	0.02	0	0	0.00057	0.35	0.09	0.03	T	C	0.28	http://www.ncbi.nlm.nih.gov/sites/entrez?Db=gene&Cmd=ShowDetailView&TermToSearch=2066&ordinalpos=1&itool=EntrezSystem2.PEntrez.Gene.Gene_ResultsPanel.Gene_RVDocSum	ERBB4	ERBB4	0	http://www.ncbi.nlm.nih.gov/sites/entrez?Db=gene&Cmd=ShowDetailView&TermToSearch=729699&ordinalpos=1&itool=EntrezSystem2.PEntrez.Gene.Gene_ResultsPanel.Gene_RVDocSum	LOC729699	LOC729699	512	http://www.ncbi.nlm.nih.gov/sites/entrez?Db=gene&Cmd=ShowDetailView&TermToSearch=646249&ordinalpos=1&itool=EntrezSystem2.PEntrez.Gene.Gene_ResultsPanel.Gene_RVDocSum	LOC646249	LOC646249	805	2.3	2.2	0.1	-0.3	0.00026	0.078	0.63	-0.5	-0.5	-0.3	-0.3	0.6	0.39	0.92
http://www.ensembl.org/Homo_sapiens/Variation/Summary?v=rs13424509	rs13424509	rs13424509	2	0.96	0.04	0	0	4.2e-05	0.57	0.14	0.02	G	A	0.13	http://www.ncbi.nlm.nih.gov/sites/entrez?Db=gene&Cmd=ShowDetailView&TermToSearch=23704&ordinalpos=1&itool=EntrezSystem2.PEntrez.Gene.Gene_ResultsPanel.Gene_RVDocSum	KCNE4	KCNE4	233	http://www.ncbi.nlm.nih.gov/sites/entrez?Db=gene&Cmd=ShowDetailView&TermToSearch=7857&ordinalpos=1&itool=EntrezSystem2.PEntrez.Gene.Gene_ResultsPanel.Gene_RVDocSum	SCG2	SCG2	310	http://www.ncbi.nlm.nih.gov/sites/entrez?Db=gene&Cmd=ShowDetailView&TermToSearch=2181&ordinalpos=1&itool=EntrezSystem2.PEntrez.Gene.Gene_ResultsPanel.Gene_RVDocSum	ACSL3	ACSL3	343	2.6	1	1	-0.1	0.0048	0.0037	0.32	-0.5	-0.4	-0.2	-0.2	0.72	0.32	0.46
http://www.ensembl.org/Homo_sapiens/Variation/Summary?v=rs13412714	rs13412714	rs13412714	2	0.96	0.04	0	0	3.8e-05	0.59	0.14	0.02	C	T	0.13	http://www.ncbi.nlm.nih.gov/sites/entrez?Db=gene&Cmd=ShowDetailView&TermToSearch=23704&ordinalpos=1&itool=EntrezSystem2.PEntrez.Gene.Gene_ResultsPanel.Gene_RVDocSum	KCNE4	KCNE4	233	http://www.ncbi.nlm.nih.gov/sites/entrez?Db=gene&Cmd=ShowDetailView&TermToSearch=7857&ordinalpos=1&itool=EntrezSystem2.PEntrez.Gene.Gene_ResultsPanel.Gene_RVDocSum	SCG2	SCG2	310	http://www.ncbi.nlm.nih.gov/sites/entrez?Db=gene&Cmd=ShowDetailView&TermToSearch=2181&ordinalpos=1&itool=EntrezSystem2.PEntrez.Gene.Gene_ResultsPanel.Gene_RVDocSum	ACSL3	ACSL3	343	2.7	1	1	-0.1	0.0048	0.0035	0.3	-0.5	-0.4	-0.2	-0.2	0.71	0.35	0.47
http://www.ensembl.org/Homo_sapiens/Variation/Summary?v=rs2090504	rs2090504	rs2090504	2	0.96	0.04	0	0	3.6e-05	0.59	0.14	0.02	T	C	0.13	http://www.ncbi.nlm.nih.gov/sites/entrez?Db=gene&Cmd=ShowDetailView&TermToSearch=23704&ordinalpos=1&itool=EntrezSystem2.PEntrez.Gene.Gene_ResultsPanel.Gene_RVDocSum	KCNE4	KCNE4	246	http://www.ncbi.nlm.nih.gov/sites/entrez?Db=gene&Cmd=ShowDetailView&TermToSearch=7857&ordinalpos=1&itool=EntrezSystem2.PEntrez.Gene.Gene_ResultsPanel.Gene_RVDocSum	SCG2	SCG2	297	http://www.ncbi.nlm.nih.gov/sites/entrez?Db=gene&Cmd=ShowDetailView&TermToSearch=2181&ordinalpos=1&itool=EntrezSystem2.PEntrez.Gene.Gene_ResultsPanel.Gene_RVDocSum	ACSL3	ACSL3	356	2.7	1	1	-0.1	0.0047	0.0034	0.3	-0.5	-0.4	-0.2	-0.2	0.71	0.35	0.47
http://www.ensembl.org/Homo_sapiens/Variation/Summary?v=rs6709028	rs6709028	rs6709028	2	0.95	0.04	0	0	3.3e-05	0.57	0.16	0.02	T	G	0.13	http://www.ncbi.nlm.nih.gov/sites/entrez?Db=gene&Cmd=ShowDetailView&TermToSearch=23704&ordinalpos=1&itool=EntrezSystem2.PEntrez.Gene.Gene_ResultsPanel.Gene_RVDocSum	KCNE4	KCNE4	247	http://www.ncbi.nlm.nih.gov/sites/entrez?Db=gene&Cmd=ShowDetailView&TermToSearch=7857&ordinalpos=1&itool=EntrezSystem2.PEntrez.Gene.Gene_ResultsPanel.Gene_RVDocSum	SCG2	SCG2	296	http://www.ncbi.nlm.nih.gov/sites/entrez?Db=gene&Cmd=ShowDetailView&TermToSearch=2181&ordinalpos=1&itool=EntrezSystem2.PEntrez.Gene.Gene_ResultsPanel.Gene_RVDocSum	ACSL3	ACSL3	357	2.7	1	1	-0.1	0.0037	0.0038	0.32	-0.5	-0.4	-0.2	-0.2	0.7	0.31	0.43
http://www.ensembl.org/Homo_sapiens/Variation/Summary?v=rs10168471	rs10168471	rs10168471	2	0.96	0.04	0	0	3.6e-05	0.59	0.14	0.02	G	C	0.13	http://www.ncbi.nlm.nih.gov/sites/entrez?Db=gene&Cmd=ShowDetailView&TermToSearch=23704&ordinalpos=1&itool=EntrezSystem2.PEntrez.Gene.Gene_ResultsPanel.Gene_RVDocSum	KCNE4	KCNE4	249	http://www.ncbi.nlm.nih.gov/sites/entrez?Db=gene&Cmd=ShowDetailView&TermToSearch=7857&ordinalpos=1&itool=EntrezSystem2.PEntrez.Gene.Gene_ResultsPanel.Gene_RVDocSum	SCG2	SCG2	294	http://www.ncbi.nlm.nih.gov/sites/entrez?Db=gene&Cmd=ShowDetailView&TermToSearch=2181&ordinalpos=1&itool=EntrezSystem2.PEntrez.Gene.Gene_ResultsPanel.Gene_RVDocSum	ACSL3	ACSL3	359	2.7	1	1	-0.1	0.0047	0.0034	0.3	-0.5	-0.4	-0.2	-0.2	0.71	0.35	0.47
http://www.ensembl.org/Homo_sapiens/Variation/Summary?v=rs13414858	rs13414858	rs13414858	2	0.96	0.04	0	0	3.6e-05	0.59	0.14	0.02	C	A	0.13	http://www.ncbi.nlm.nih.gov/sites/entrez?Db=gene&Cmd=ShowDetailView&TermToSearch=23704&ordinalpos=1&itool=EntrezSystem2.PEntrez.Gene.Gene_ResultsPanel.Gene_RVDocSum	KCNE4	KCNE4	249	http://www.ncbi.nlm.nih.gov/sites/entrez?Db=gene&Cmd=ShowDetailView&TermToSearch=7857&ordinalpos=1&itool=EntrezSystem2.PEntrez.Gene.Gene_ResultsPanel.Gene_RVDocSum	SCG2	SCG2	294	http://www.ncbi.nlm.nih.gov/sites/entrez?Db=gene&Cmd=ShowDetailView&TermToSearch=2181&ordinalpos=1&itool=EntrezSystem2.PEntrez.Gene.Gene_ResultsPanel.Gene_RVDocSum	ACSL3	ACSL3	360	2.7	1	1	-0.1	0.0047	0.0034	0.3	-0.5	-0.4	-0.2	-0.2	0.71	0.35	0.47
http://www.ensembl.org/Homo_sapiens/Variation/Summary?v=rs12471688	rs12471688	rs12471688	2	0.96	0.04	0	0	0.00013	0.6	0.11	-0.02	A	G	0.21	http://www.ncbi.nlm.nih.gov/sites/entrez?Db=gene&Cmd=ShowDetailView&TermToSearch=23677&ordinalpos=1&itool=EntrezSystem2.PEntrez.Gene.Gene_ResultsPanel.Gene_RVDocSum	SH3BP4	SH3BP4	0	http://www.ncbi.nlm.nih.gov/sites/entrez?Db=gene&Cmd=ShowDetailView&TermToSearch=642692&ordinalpos=1&itool=EntrezSystem2.PEntrez.Gene.Gene_ResultsPanel.Gene_RVDocSum	LOC642692	LOC642692	123	http://www.ncbi.nlm.nih.gov/sites/entrez?Db=gene&Cmd=ShowDetailView&TermToSearch=116987&ordinalpos=1&itool=EntrezSystem2.PEntrez.Gene.Gene_ResultsPanel.Gene_RVDocSum	CENTG2	CENTG2	470	2.6	1.7	0.8	-0.3	0.00065	0.017	0.97	-0.6	-0.5	-0.2	-0.1	0.76	0.22	0.24
http://www.ensembl.org/Homo_sapiens/Variation/Summary?v=rs10199034	rs10199034	rs10199034	2	0.98	0.02	0	0	0.00017	0.63	0.1	-0.01	C	G	0.24	http://www.ncbi.nlm.nih.gov/sites/entrez?Db=gene&Cmd=ShowDetailView&TermToSearch=23677&ordinalpos=1&itool=EntrezSystem2.PEntrez.Gene.Gene_ResultsPanel.Gene_RVDocSum	SH3BP4	SH3BP4	0	http://www.ncbi.nlm.nih.gov/sites/entrez?Db=gene&Cmd=ShowDetailView&TermToSearch=642692&ordinalpos=1&itool=EntrezSystem2.PEntrez.Gene.Gene_ResultsPanel.Gene_RVDocSum	LOC642692	LOC642692	120	http://www.ncbi.nlm.nih.gov/sites/entrez?Db=gene&Cmd=ShowDetailView&TermToSearch=116987&ordinalpos=1&itool=EntrezSystem2.PEntrez.Gene.Gene_ResultsPanel.Gene_RVDocSum	CENTG2	CENTG2	467	2.4	1.7	0.9	-0.2	0.00054	0.012	0.54	-0.5	-0.5	-0.1	0.2	0.63	0.19	0.07
http://www.ensembl.org/Homo_sapiens/Variation/Summary?v=rs2195195	rs2195195	rs2195195	2	0.98	0.02	0	0	0.00017	0.61	0.1	-0.01	C	T	0.23	http://www.ncbi.nlm.nih.gov/sites/entrez?Db=gene&Cmd=ShowDetailView&TermToSearch=23677&ordinalpos=1&itool=EntrezSystem2.PEntrez.Gene.Gene_ResultsPanel.Gene_RVDocSum	SH3BP4	SH3BP4	0	http://www.ncbi.nlm.nih.gov/sites/entrez?Db=gene&Cmd=ShowDetailView&TermToSearch=642692&ordinalpos=1&itool=EntrezSystem2.PEntrez.Gene.Gene_ResultsPanel.Gene_RVDocSum	LOC642692	LOC642692	117	http://www.ncbi.nlm.nih.gov/sites/entrez?Db=gene&Cmd=ShowDetailView&TermToSearch=116987&ordinalpos=1&itool=EntrezSystem2.PEntrez.Gene.Gene_ResultsPanel.Gene_RVDocSum	CENTG2	CENTG2	464	2.3	1.7	0.9	-0.3	0.00064	0.011	0.57	-0.5	-0.5	-0.1	0.1	0.6	0.18	0.076
http://www.ensembl.org/Homo_sapiens/Variation/Summary?v=rs9789377	rs9789377	rs9789377	2	0.98	0.02	0	0	0.0001	0.57	0.11	-0.02	A	G	0.35	http://www.ncbi.nlm.nih.gov/sites/entrez?Db=gene&Cmd=ShowDetailView&TermToSearch=116987&ordinalpos=1&itool=EntrezSystem2.PEntrez.Gene.Gene_ResultsPanel.Gene_RVDocSum	CENTG2	CENTG2	37	http://www.ncbi.nlm.nih.gov/sites/entrez?Db=gene&Cmd=ShowDetailView&TermToSearch=642692&ordinalpos=1&itool=EntrezSystem2.PEntrez.Gene.Gene_ResultsPanel.Gene_RVDocSum	LOC642692	LOC642692	309	http://www.ncbi.nlm.nih.gov/sites/entrez?Db=gene&Cmd=ShowDetailView&TermToSearch=23677&ordinalpos=1&itool=EntrezSystem2.PEntrez.Gene.Gene_ResultsPanel.Gene_RVDocSum	SH3BP4	SH3BP4	401	2.3	0.2	1.2	0.2	0.044	0.0021	0.081	-0.6	-0.5	-0.2	-0.3	0.84	0.34	0.75
http://www.ensembl.org/Homo_sapiens/Variation/Summary?v=rs1377451	rs1377451	rs1377451	2	0.97	0	0	0.03	0.15	2.7e-06	-0.05	-0.15	T	C	0.16	http://www.ncbi.nlm.nih.gov/sites/entrez?Db=gene&Cmd=ShowDetailView&TermToSearch=401036&ordinalpos=1&itool=EntrezSystem2.PEntrez.Gene.Gene_ResultsPanel.Gene_RVDocSum	ASB18	ASB18	5	http://www.ncbi.nlm.nih.gov/sites/entrez?Db=gene&Cmd=ShowDetailView&TermToSearch=728087&ordinalpos=1&itool=EntrezSystem2.PEntrez.Gene.Gene_ResultsPanel.Gene_RVDocSum	LOC728087	LOC728087	69	http://www.ncbi.nlm.nih.gov/sites/entrez?Db=gene&Cmd=ShowDetailView&TermToSearch=79781&ordinalpos=1&itool=EntrezSystem2.PEntrez.Gene.Gene_ResultsPanel.Gene_RVDocSum	IQCA	IQCA	77	-0.2	-0.4	0.3	-0.1	0.75	0.033	0.26	3.7	1.2	0.9	0.6	0.0026	0.0063	0.014
http://www.ensembl.org/Homo_sapiens/Variation/Summary?v=rs1377449	rs1377449	rs1377449	2	0.97	0	0.01	0.03	0.15	2.6e-06	-0.05	-0.15	C	T	0.16	http://www.ncbi.nlm.nih.gov/sites/entrez?Db=gene&Cmd=ShowDetailView&TermToSearch=401036&ordinalpos=1&itool=EntrezSystem2.PEntrez.Gene.Gene_ResultsPanel.Gene_RVDocSum	ASB18	ASB18	6	http://www.ncbi.nlm.nih.gov/sites/entrez?Db=gene&Cmd=ShowDetailView&TermToSearch=728087&ordinalpos=1&itool=EntrezSystem2.PEntrez.Gene.Gene_ResultsPanel.Gene_RVDocSum	LOC728087	LOC728087	69	http://www.ncbi.nlm.nih.gov/sites/entrez?Db=gene&Cmd=ShowDetailView&TermToSearch=79781&ordinalpos=1&itool=EntrezSystem2.PEntrez.Gene.Gene_ResultsPanel.Gene_RVDocSum	IQCA	IQCA	77	-0.2	-0.4	0.4	-0.1	0.74	0.032	0.26	3.7	1.2	0.9	0.6	0.0026	0.0062	0.014
http://www.ensembl.org/Homo_sapiens/Variation/Summary?v=rs13390159	rs13390159	rs13390159	2	0.96	0	0.01	0.03	0.14	2.3e-06	-0.05	-0.15	A	G	0.16	http://www.ncbi.nlm.nih.gov/sites/entrez?Db=gene&Cmd=ShowDetailView&TermToSearch=401036&ordinalpos=1&itool=EntrezSystem2.PEntrez.Gene.Gene_ResultsPanel.Gene_RVDocSum	ASB18	ASB18	6	http://www.ncbi.nlm.nih.gov/sites/entrez?Db=gene&Cmd=ShowDetailView&TermToSearch=728087&ordinalpos=1&itool=EntrezSystem2.PEntrez.Gene.Gene_ResultsPanel.Gene_RVDocSum	LOC728087	LOC728087	70	http://www.ncbi.nlm.nih.gov/sites/entrez?Db=gene&Cmd=ShowDetailView&TermToSearch=79781&ordinalpos=1&itool=EntrezSystem2.PEntrez.Gene.Gene_ResultsPanel.Gene_RVDocSum	IQCA	IQCA	76	-0.2	-0.4	0.4	-0.1	0.75	0.029	0.28	3.8	1.2	0.8	0.6	0.0026	0.0066	0.011
http://www.ensembl.org/Homo_sapiens/Variation/Summary?v=rs13416480	rs13416480	rs13416480	2	0.97	0	0.01	0.03	0.15	2.6e-06	-0.05	-0.15	T	C	0.16	http://www.ncbi.nlm.nih.gov/sites/entrez?Db=gene&Cmd=ShowDetailView&TermToSearch=401036&ordinalpos=1&itool=EntrezSystem2.PEntrez.Gene.Gene_ResultsPanel.Gene_RVDocSum	ASB18	ASB18	6	http://www.ncbi.nlm.nih.gov/sites/entrez?Db=gene&Cmd=ShowDetailView&TermToSearch=728087&ordinalpos=1&itool=EntrezSystem2.PEntrez.Gene.Gene_ResultsPanel.Gene_RVDocSum	LOC728087	LOC728087	70	http://www.ncbi.nlm.nih.gov/sites/entrez?Db=gene&Cmd=ShowDetailView&TermToSearch=79781&ordinalpos=1&itool=EntrezSystem2.PEntrez.Gene.Gene_ResultsPanel.Gene_RVDocSum	IQCA	IQCA	76	-0.2	-0.4	0.4	-0.1	0.75	0.032	0.26	3.7	1.2	0.9	0.6	0.0026	0.0062	0.014
http://www.ensembl.org/Homo_sapiens/Variation/Summary?v=rs7598462	rs7598462	rs7598462	2	0.97	0	0.01	0.03	0.15	2.5e-06	-0.05	-0.15	C	T	0.16	http://www.ncbi.nlm.nih.gov/sites/entrez?Db=gene&Cmd=ShowDetailView&TermToSearch=401036&ordinalpos=1&itool=EntrezSystem2.PEntrez.Gene.Gene_ResultsPanel.Gene_RVDocSum	ASB18	ASB18	8	http://www.ncbi.nlm.nih.gov/sites/entrez?Db=gene&Cmd=ShowDetailView&TermToSearch=728087&ordinalpos=1&itool=EntrezSystem2.PEntrez.Gene.Gene_ResultsPanel.Gene_RVDocSum	LOC728087	LOC728087	71	http://www.ncbi.nlm.nih.gov/sites/entrez?Db=gene&Cmd=ShowDetailView&TermToSearch=79781&ordinalpos=1&itool=EntrezSystem2.PEntrez.Gene.Gene_ResultsPanel.Gene_RVDocSum	IQCA	IQCA	74	-0.2	-0.4	0.4	-0.1	0.75	0.032	0.26	3.7	1.2	0.9	0.6	0.0026	0.0062	0.014
http://www.ensembl.org/Homo_sapiens/Variation/Summary?v=rs7598601	rs7598601	rs7598601	2	0.97	0	0.01	0.03	0.15	2.5e-06	-0.05	-0.15	G	A	0.16	http://www.ncbi.nlm.nih.gov/sites/entrez?Db=gene&Cmd=ShowDetailView&TermToSearch=401036&ordinalpos=1&itool=EntrezSystem2.PEntrez.Gene.Gene_ResultsPanel.Gene_RVDocSum	ASB18	ASB18	8	http://www.ncbi.nlm.nih.gov/sites/entrez?Db=gene&Cmd=ShowDetailView&TermToSearch=728087&ordinalpos=1&itool=EntrezSystem2.PEntrez.Gene.Gene_ResultsPanel.Gene_RVDocSum	LOC728087	LOC728087	72	http://www.ncbi.nlm.nih.gov/sites/entrez?Db=gene&Cmd=ShowDetailView&TermToSearch=79781&ordinalpos=1&itool=EntrezSystem2.PEntrez.Gene.Gene_ResultsPanel.Gene_RVDocSum	IQCA	IQCA	74	-0.2	-0.4	0.4	-0.1	0.75	0.032	0.26	3.7	1.2	0.9	0.6	0.0025	0.0061	0.014
http://www.ensembl.org/Homo_sapiens/Variation/Summary?v=rs4684579	rs4684579	rs4684579	3	0.99	0.01	0	0	0.00032	0.92	0.09	0	G	A	0.4	http://www.ncbi.nlm.nih.gov/sites/entrez?Db=gene&Cmd=ShowDetailView&TermToSearch=402123&ordinalpos=1&itool=EntrezSystem2.PEntrez.Gene.Gene_ResultsPanel.Gene_RVDocSum	LOC402123	LOC402123	218	http://www.ncbi.nlm.nih.gov/sites/entrez?Db=gene&Cmd=ShowDetailView&TermToSearch=27255&ordinalpos=1&itool=EntrezSystem2.PEntrez.Gene.Gene_ResultsPanel.Gene_RVDocSum	CNTN6	CNTN6	257	http://www.ncbi.nlm.nih.gov/sites/entrez?Db=gene&Cmd=ShowDetailView&TermToSearch=10752&ordinalpos=1&itool=EntrezSystem2.PEntrez.Gene.Gene_ResultsPanel.Gene_RVDocSum	CHL1	CHL1	427	2	-0.4	1.9	0.5	0.49	0.0003	0.034	-0.7	-0.3	-0.2	-0.3	0.3	0.18	0.91
http://www.ensembl.org/Homo_sapiens/Variation/Summary?v=rs17486713	rs17486713	rs17486713	3	0.99	0.01	0	0	0.00031	0.92	0.1	0	G	T	0.4	http://www.ncbi.nlm.nih.gov/sites/entrez?Db=gene&Cmd=ShowDetailView&TermToSearch=402123&ordinalpos=1&itool=EntrezSystem2.PEntrez.Gene.Gene_ResultsPanel.Gene_RVDocSum	LOC402123	LOC402123	221	http://www.ncbi.nlm.nih.gov/sites/entrez?Db=gene&Cmd=ShowDetailView&TermToSearch=27255&ordinalpos=1&itool=EntrezSystem2.PEntrez.Gene.Gene_ResultsPanel.Gene_RVDocSum	CNTN6	CNTN6	254	http://www.ncbi.nlm.nih.gov/sites/entrez?Db=gene&Cmd=ShowDetailView&TermToSearch=10752&ordinalpos=1&itool=EntrezSystem2.PEntrez.Gene.Gene_ResultsPanel.Gene_RVDocSum	CHL1	CHL1	429	2.1	-0.4	1.9	0.5	0.5	0.00027	0.032	-0.7	-0.3	-0.2	-0.3	0.3	0.18	0.91
http://www.ensembl.org/Homo_sapiens/Variation/Summary?v=rs4684585	rs4684585	rs4684585	3	0.97	0.03	0	0	5.3e-05	0.63	-0.19	-0.02	G	A	0.43	http://www.ncbi.nlm.nih.gov/sites/entrez?Db=gene&Cmd=ShowDetailView&TermToSearch=402123&ordinalpos=1&itool=EntrezSystem2.PEntrez.Gene.Gene_ResultsPanel.Gene_RVDocSum	LOC402123	LOC402123	224	http://www.ncbi.nlm.nih.gov/sites/entrez?Db=gene&Cmd=ShowDetailView&TermToSearch=27255&ordinalpos=1&itool=EntrezSystem2.PEntrez.Gene.Gene_ResultsPanel.Gene_RVDocSum	CNTN6	CNTN6	251	http://www.ncbi.nlm.nih.gov/sites/entrez?Db=gene&Cmd=ShowDetailView&TermToSearch=10752&ordinalpos=1&itool=EntrezSystem2.PEntrez.Gene.Gene_ResultsPanel.Gene_RVDocSum	CHL1	CHL1	433	2.5	NA	1.4	0.5	NA	0.0011	0.016	-0.3	NA	-0.2	-0.2	NA	0.79	0.64
http://www.ensembl.org/Homo_sapiens/Variation/Summary?v=rs4686247	rs4686247	rs4686247	3	0.97	0.02	0	0	6e-05	0.85	-0.19	-0.01	A	C	0.43	http://www.ncbi.nlm.nih.gov/sites/entrez?Db=gene&Cmd=ShowDetailView&TermToSearch=402123&ordinalpos=1&itool=EntrezSystem2.PEntrez.Gene.Gene_ResultsPanel.Gene_RVDocSum	LOC402123	LOC402123	233	http://www.ncbi.nlm.nih.gov/sites/entrez?Db=gene&Cmd=ShowDetailView&TermToSearch=27255&ordinalpos=1&itool=EntrezSystem2.PEntrez.Gene.Gene_ResultsPanel.Gene_RVDocSum	CNTN6	CNTN6	242	http://www.ncbi.nlm.nih.gov/sites/entrez?Db=gene&Cmd=ShowDetailView&TermToSearch=10752&ordinalpos=1&itool=EntrezSystem2.PEntrez.Gene.Gene_ResultsPanel.Gene_RVDocSum	CHL1	CHL1	442	2.5	NA	1.2	0.7	NA	0.0021	0.0087	-0.3	NA	-0.2	-0.3	NA	0.91	0.87
http://www.ensembl.org/Homo_sapiens/Variation/Summary?v=rs35964523	rs35964523	rs35964523	3	0.87	0.12	0	0.01	7.9e-06	0.79	-0.23	-0.01	T	C	0.42	http://www.ncbi.nlm.nih.gov/sites/entrez?Db=gene&Cmd=ShowDetailView&TermToSearch=27255&ordinalpos=1&itool=EntrezSystem2.PEntrez.Gene.Gene_ResultsPanel.Gene_RVDocSum	CNTN6	CNTN6	236	http://www.ncbi.nlm.nih.gov/sites/entrez?Db=gene&Cmd=ShowDetailView&TermToSearch=402123&ordinalpos=1&itool=EntrezSystem2.PEntrez.Gene.Gene_ResultsPanel.Gene_RVDocSum	LOC402123	LOC402123	239	http://www.ncbi.nlm.nih.gov/sites/entrez?Db=gene&Cmd=ShowDetailView&TermToSearch=10752&ordinalpos=1&itool=EntrezSystem2.PEntrez.Gene.Gene_ResultsPanel.Gene_RVDocSum	CHL1	CHL1	448	3.2	NA	1.5	1.1	NA	0.0008	0.0026	-0.4	NA	-0.3	-0.2	NA	1	0.64
http://www.ensembl.org/Homo_sapiens/Variation/Summary?v=rs1720199	rs1720199	rs1720199	3	0.99	0.01	0	0	0.00014	0.051	-0.15	-0.08	T	C	0.15	http://www.ncbi.nlm.nih.gov/sites/entrez?Db=gene&Cmd=ShowDetailView&TermToSearch=152330&ordinalpos=1&itool=EntrezSystem2.PEntrez.Gene.Gene_ResultsPanel.Gene_RVDocSum	CNTN4	CNTN4	0	http://www.ncbi.nlm.nih.gov/sites/entrez?Db=gene&Cmd=ShowDetailView&TermToSearch=727810&ordinalpos=1&itool=EntrezSystem2.PEntrez.Gene.Gene_ResultsPanel.Gene_RVDocSum	LOC727810	LOC727810	384	http://www.ncbi.nlm.nih.gov/sites/entrez?Db=gene&Cmd=ShowDetailView&TermToSearch=391504&ordinalpos=1&itool=EntrezSystem2.PEntrez.Gene.Gene_ResultsPanel.Gene_RVDocSum	LOC391504	LOC391504	694	2.2	0.3	0.9	0.1	0.046	0.0057	0.086	0.2	-0.1	-0.3	0.3	0.28	0.5	0.049
http://www.ensembl.org/Homo_sapiens/Variation/Summary?v=rs11915941	rs11915941	rs11915941	3	0.98	0.01	0	0	0.00013	0.072	-0.15	-0.07	A	G	0.13	http://www.ncbi.nlm.nih.gov/sites/entrez?Db=gene&Cmd=ShowDetailView&TermToSearch=152330&ordinalpos=1&itool=EntrezSystem2.PEntrez.Gene.Gene_ResultsPanel.Gene_RVDocSum	CNTN4	CNTN4	0	http://www.ncbi.nlm.nih.gov/sites/entrez?Db=gene&Cmd=ShowDetailView&TermToSearch=727810&ordinalpos=1&itool=EntrezSystem2.PEntrez.Gene.Gene_ResultsPanel.Gene_RVDocSum	LOC727810	LOC727810	387	http://www.ncbi.nlm.nih.gov/sites/entrez?Db=gene&Cmd=ShowDetailView&TermToSearch=391504&ordinalpos=1&itool=EntrezSystem2.PEntrez.Gene.Gene_ResultsPanel.Gene_RVDocSum	LOC391504	LOC391504	697	2.2	0.2	1	0.2	0.06	0.0032	0.078	0.1	-0.2	-0.2	0.3	0.34	0.58	0.042
http://www.ensembl.org/Homo_sapiens/Variation/Summary?v=rs17041493	rs17041493	rs17041493	3	0.99	0.01	0	0	0.00014	0.71	-0.12	0.01	A	G	0.16	http://www.ncbi.nlm.nih.gov/sites/entrez?Db=gene&Cmd=ShowDetailView&TermToSearch=3708&ordinalpos=1&itool=EntrezSystem2.PEntrez.Gene.Gene_ResultsPanel.Gene_RVDocSum	ITPR1	ITPR1	0	http://www.ncbi.nlm.nih.gov/sites/entrez?Db=gene&Cmd=ShowDetailView&TermToSearch=8553&ordinalpos=1&itool=EntrezSystem2.PEntrez.Gene.Gene_ResultsPanel.Gene_RVDocSum	BHLHB2	BHLHB2	153	http://www.ncbi.nlm.nih.gov/sites/entrez?Db=gene&Cmd=ShowDetailView&TermToSearch=643182&ordinalpos=1&itool=EntrezSystem2.PEntrez.Gene.Gene_ResultsPanel.Gene_RVDocSum	LOC643182	LOC643182	253	2.2	1.4	0.1	-0.1	0.0012	0.075	0.26	-0.5	0.5	-0.4	0.7	0.02	0.64	0.0093
http://www.ensembl.org/Homo_sapiens/Variation/Summary?v=rs17786757	rs17786757	rs17786757	3	0.99	0.01	0	0	0.0002	0.77	-0.12	0.01	A	G	0.17	http://www.ncbi.nlm.nih.gov/sites/entrez?Db=gene&Cmd=ShowDetailView&TermToSearch=3708&ordinalpos=1&itool=EntrezSystem2.PEntrez.Gene.Gene_ResultsPanel.Gene_RVDocSum	ITPR1	ITPR1	0	http://www.ncbi.nlm.nih.gov/sites/entrez?Db=gene&Cmd=ShowDetailView&TermToSearch=8553&ordinalpos=1&itool=EntrezSystem2.PEntrez.Gene.Gene_ResultsPanel.Gene_RVDocSum	BHLHB2	BHLHB2	152	http://www.ncbi.nlm.nih.gov/sites/entrez?Db=gene&Cmd=ShowDetailView&TermToSearch=643182&ordinalpos=1&itool=EntrezSystem2.PEntrez.Gene.Gene_ResultsPanel.Gene_RVDocSum	LOC643182	LOC643182	253	2	1.4	0	-0.1	0.0012	0.1	0.24	-0.5	0.4	-0.3	0.7	0.025	0.56	0.011
http://www.ensembl.org/Homo_sapiens/Variation/Summary?v=rs12491098	rs12491098	rs12491098	3	0.99	0.01	0	0	0.00019	0.73	-0.12	0.01	A	G	0.16	http://www.ncbi.nlm.nih.gov/sites/entrez?Db=gene&Cmd=ShowDetailView&TermToSearch=3708&ordinalpos=1&itool=EntrezSystem2.PEntrez.Gene.Gene_ResultsPanel.Gene_RVDocSum	ITPR1	ITPR1	0	http://www.ncbi.nlm.nih.gov/sites/entrez?Db=gene&Cmd=ShowDetailView&TermToSearch=8553&ordinalpos=1&itool=EntrezSystem2.PEntrez.Gene.Gene_ResultsPanel.Gene_RVDocSum	BHLHB2	BHLHB2	152	http://www.ncbi.nlm.nih.gov/sites/entrez?Db=gene&Cmd=ShowDetailView&TermToSearch=643182&ordinalpos=1&itool=EntrezSystem2.PEntrez.Gene.Gene_ResultsPanel.Gene_RVDocSum	LOC643182	LOC643182	252	2.1	1.4	0	-0.1	0.0012	0.1	0.25	-0.5	0.4	-0.4	0.6	0.025	0.59	0.012
http://www.ensembl.org/Homo_sapiens/Variation/Summary?v=rs2565612	rs2565612	rs2565612	3	0.97	0.03	0	0	6.7e-05	0.53	0.16	-0.03	G	A	0.18	http://www.ncbi.nlm.nih.gov/sites/entrez?Db=gene&Cmd=ShowDetailView&TermToSearch=339910&ordinalpos=1&itool=EntrezSystem2.PEntrez.Gene.Gene_ResultsPanel.Gene_RVDocSum	MRPS35P1	MRPS35P1	34	http://www.ncbi.nlm.nih.gov/sites/entrez?Db=gene&Cmd=ShowDetailView&TermToSearch=9695&ordinalpos=1&itool=EntrezSystem2.PEntrez.Gene.Gene_ResultsPanel.Gene_RVDocSum	EDEM1	EDEM1	261	http://www.ncbi.nlm.nih.gov/sites/entrez?Db=gene&Cmd=ShowDetailView&TermToSearch=55207&ordinalpos=1&itool=EntrezSystem2.PEntrez.Gene.Gene_ResultsPanel.Gene_RVDocSum	ARL8B	ARL8B	300	2.5	0.1	1.3	0.2	0.088	0.0016	0.058	-0.4	0.1	-0.3	-0.2	0.12	0.46	0.49
http://www.ensembl.org/Homo_sapiens/Variation/Summary?v=rs7633531	rs7633531	rs7633531	3	0.92	0.08	0	0	1.6e-05	0.64	0.13	0.01	T	G	0.18	http://www.ncbi.nlm.nih.gov/sites/entrez?Db=gene&Cmd=ShowDetailView&TermToSearch=285322&ordinalpos=1&itool=EntrezSystem2.PEntrez.Gene.Gene_ResultsPanel.Gene_RVDocSum	C3orf53	C3orf53	211	http://www.ncbi.nlm.nih.gov/sites/entrez?Db=gene&Cmd=ShowDetailView&TermToSearch=152098&ordinalpos=1&itool=EntrezSystem2.PEntrez.Gene.Gene_ResultsPanel.Gene_RVDocSum	ZCWPW2	ZCWPW2	262	http://www.ncbi.nlm.nih.gov/sites/entrez?Db=gene&Cmd=ShowDetailView&TermToSearch=131572&ordinalpos=1&itool=EntrezSystem2.PEntrez.Gene.Gene_ResultsPanel.Gene_RVDocSum	LOC131572	LOC131572	300	3	2.8	-0.2	0.2	2.8e-05	0.32	0.061	-0.6	-0.4	-0.2	-0.3	0.86	0.26	0.88
http://www.ensembl.org/Homo_sapiens/Variation/Summary?v=rs4680784	rs4680784	rs4680784	3	0.89	0.1	0	0	1.2e-05	0.67	0.14	0.01	A	G	0.17	http://www.ncbi.nlm.nih.gov/sites/entrez?Db=gene&Cmd=ShowDetailView&TermToSearch=285322&ordinalpos=1&itool=EntrezSystem2.PEntrez.Gene.Gene_ResultsPanel.Gene_RVDocSum	C3orf53	C3orf53	214	http://www.ncbi.nlm.nih.gov/sites/entrez?Db=gene&Cmd=ShowDetailView&TermToSearch=152098&ordinalpos=1&itool=EntrezSystem2.PEntrez.Gene.Gene_ResultsPanel.Gene_RVDocSum	ZCWPW2	ZCWPW2	265	http://www.ncbi.nlm.nih.gov/sites/entrez?Db=gene&Cmd=ShowDetailView&TermToSearch=131572&ordinalpos=1&itool=EntrezSystem2.PEntrez.Gene.Gene_ResultsPanel.Gene_RVDocSum	LOC131572	LOC131572	297	3.1	2.9	-0.2	0.2	1.7e-05	0.31	0.05	-0.5	-0.4	-0.2	-0.3	0.75	0.27	0.97
http://www.ensembl.org/Homo_sapiens/Variation/Summary?v=rs885164	rs885164	rs885164	3	0.99	0.01	0	0	0.00019	0.55	-0.12	0.02	T	C	0.33	http://www.ncbi.nlm.nih.gov/sites/entrez?Db=gene&Cmd=ShowDetailView&TermToSearch=645548&ordinalpos=1&itool=EntrezSystem2.PEntrez.Gene.Gene_ResultsPanel.Gene_RVDocSum	LOC645548	LOC645548	19	http://www.ncbi.nlm.nih.gov/sites/entrez?Db=gene&Cmd=ShowDetailView&TermToSearch=85443&ordinalpos=1&itool=EntrezSystem2.PEntrez.Gene.Gene_ResultsPanel.Gene_RVDocSum	DCAMKL3	DCAMKL3	23	http://www.ncbi.nlm.nih.gov/sites/entrez?Db=gene&Cmd=ShowDetailView&TermToSearch=9881&ordinalpos=1&itool=EntrezSystem2.PEntrez.Gene.Gene_ResultsPanel.Gene_RVDocSum	LBA1	LBA1	39	2.1	-0.3	1.8	0.2	0.58	0.00037	0.061	-0.5	-0.2	-0.4	-0.3	0.32	0.78	0.85
http://www.ensembl.org/Homo_sapiens/Variation/Summary?v=rs1507869	rs1507869	rs1507869	3	0.99	0.01	0	0	0.00019	0.55	-0.12	0.02	A	G	0.32	http://www.ncbi.nlm.nih.gov/sites/entrez?Db=gene&Cmd=ShowDetailView&TermToSearch=645548&ordinalpos=1&itool=EntrezSystem2.PEntrez.Gene.Gene_ResultsPanel.Gene_RVDocSum	LOC645548	LOC645548	20	http://www.ncbi.nlm.nih.gov/sites/entrez?Db=gene&Cmd=ShowDetailView&TermToSearch=85443&ordinalpos=1&itool=EntrezSystem2.PEntrez.Gene.Gene_ResultsPanel.Gene_RVDocSum	DCAMKL3	DCAMKL3	24	http://www.ncbi.nlm.nih.gov/sites/entrez?Db=gene&Cmd=ShowDetailView&TermToSearch=9881&ordinalpos=1&itool=EntrezSystem2.PEntrez.Gene.Gene_ResultsPanel.Gene_RVDocSum	LBA1	LBA1	38	2.1	-0.3	1.8	0.2	0.58	0.00037	0.061	-0.5	-0.2	-0.4	-0.3	0.32	0.78	0.85
http://www.ensembl.org/Homo_sapiens/Variation/Summary?v=rs6800933	rs6800933	rs6800933	3	0.99	0.01	0	0	0.00018	0.083	-0.12	0.06	C	T	0.15	http://www.ncbi.nlm.nih.gov/sites/entrez?Db=gene&Cmd=ShowDetailView&TermToSearch=90102&ordinalpos=1&itool=EntrezSystem2.PEntrez.Gene.Gene_ResultsPanel.Gene_RVDocSum	PHLDB2	PHLDB2	0	http://www.ncbi.nlm.nih.gov/sites/entrez?Db=gene&Cmd=ShowDetailView&TermToSearch=55347&ordinalpos=1&itool=EntrezSystem2.PEntrez.Gene.Gene_ResultsPanel.Gene_RVDocSum	ABHD10	ABHD10	16	http://www.ncbi.nlm.nih.gov/sites/entrez?Db=gene&Cmd=ShowDetailView&TermToSearch=29114&ordinalpos=1&itool=EntrezSystem2.PEntrez.Gene.Gene_ResultsPanel.Gene_RVDocSum	TAGLN3	TAGLN3	36	2.1	0.1	2.2	-0.2	0.073	9.5e-05	0.67	0	-0.4	-0.2	0.1	0.54	0.29	0.077
http://www.ensembl.org/Homo_sapiens/Variation/Summary?v=rs6788410	rs6788410	rs6788410	3	0.99	0.01	0	0	0.00019	0.08	-0.12	0.06	A	G	0.14	http://www.ncbi.nlm.nih.gov/sites/entrez?Db=gene&Cmd=ShowDetailView&TermToSearch=90102&ordinalpos=1&itool=EntrezSystem2.PEntrez.Gene.Gene_ResultsPanel.Gene_RVDocSum	PHLDB2	PHLDB2	0	http://www.ncbi.nlm.nih.gov/sites/entrez?Db=gene&Cmd=ShowDetailView&TermToSearch=55347&ordinalpos=1&itool=EntrezSystem2.PEntrez.Gene.Gene_ResultsPanel.Gene_RVDocSum	ABHD10	ABHD10	16	http://www.ncbi.nlm.nih.gov/sites/entrez?Db=gene&Cmd=ShowDetailView&TermToSearch=29114&ordinalpos=1&itool=EntrezSystem2.PEntrez.Gene.Gene_ResultsPanel.Gene_RVDocSum	TAGLN3	TAGLN3	35	2.1	0.1	2.2	-0.2	0.074	9.9e-05	0.66	0	-0.4	-0.2	0.1	0.54	0.28	0.081
http://www.ensembl.org/Homo_sapiens/Variation/Summary?v=rs16858949	rs16858949	rs16858949	3	0.99	0.01	0	0	0.00019	0.075	-0.12	0.06	C	A	0.15	http://www.ncbi.nlm.nih.gov/sites/entrez?Db=gene&Cmd=ShowDetailView&TermToSearch=90102&ordinalpos=1&itool=EntrezSystem2.PEntrez.Gene.Gene_ResultsPanel.Gene_RVDocSum	PHLDB2	PHLDB2	0	http://www.ncbi.nlm.nih.gov/sites/entrez?Db=gene&Cmd=ShowDetailView&TermToSearch=55347&ordinalpos=1&itool=EntrezSystem2.PEntrez.Gene.Gene_ResultsPanel.Gene_RVDocSum	ABHD10	ABHD10	15	http://www.ncbi.nlm.nih.gov/sites/entrez?Db=gene&Cmd=ShowDetailView&TermToSearch=29114&ordinalpos=1&itool=EntrezSystem2.PEntrez.Gene.Gene_ResultsPanel.Gene_RVDocSum	TAGLN3	TAGLN3	34	2.1	0.1	2.2	-0.2	0.071	0.00011	0.65	0	-0.4	-0.2	0.1	0.52	0.26	0.087
http://www.ensembl.org/Homo_sapiens/Variation/Summary?v=rs11928983	rs11928983	rs11928983	3	0.99	0.01	0	0	0.00019	0.078	-0.12	0.06	T	C	0.15	http://www.ncbi.nlm.nih.gov/sites/entrez?Db=gene&Cmd=ShowDetailView&TermToSearch=90102&ordinalpos=1&itool=EntrezSystem2.PEntrez.Gene.Gene_ResultsPanel.Gene_RVDocSum	PHLDB2	PHLDB2	0	http://www.ncbi.nlm.nih.gov/sites/entrez?Db=gene&Cmd=ShowDetailView&TermToSearch=55347&ordinalpos=1&itool=EntrezSystem2.PEntrez.Gene.Gene_ResultsPanel.Gene_RVDocSum	ABHD10	ABHD10	14	http://www.ncbi.nlm.nih.gov/sites/entrez?Db=gene&Cmd=ShowDetailView&TermToSearch=29114&ordinalpos=1&itool=EntrezSystem2.PEntrez.Gene.Gene_ResultsPanel.Gene_RVDocSum	TAGLN3	TAGLN3	34	2.1	0.1	2.2	-0.2	0.073	0.00012	0.63	0	-0.4	-0.2	0.1	0.52	0.26	0.1
http://www.ensembl.org/Homo_sapiens/Variation/Summary?v=rs11928985	rs11928985	rs11928985	3	0.99	0.01	0	0	0.0002	0.08	-0.12	0.06	G	C	0.15	http://www.ncbi.nlm.nih.gov/sites/entrez?Db=gene&Cmd=ShowDetailView&TermToSearch=90102&ordinalpos=1&itool=EntrezSystem2.PEntrez.Gene.Gene_ResultsPanel.Gene_RVDocSum	PHLDB2	PHLDB2	0	http://www.ncbi.nlm.nih.gov/sites/entrez?Db=gene&Cmd=ShowDetailView&TermToSearch=55347&ordinalpos=1&itool=EntrezSystem2.PEntrez.Gene.Gene_ResultsPanel.Gene_RVDocSum	ABHD10	ABHD10	14	http://www.ncbi.nlm.nih.gov/sites/entrez?Db=gene&Cmd=ShowDetailView&TermToSearch=29114&ordinalpos=1&itool=EntrezSystem2.PEntrez.Gene.Gene_ResultsPanel.Gene_RVDocSum	TAGLN3	TAGLN3	34	2.1	0.1	2.1	-0.2	0.073	0.00013	0.62	0	-0.4	-0.2	0.1	0.51	0.26	0.11
http://www.ensembl.org/Homo_sapiens/Variation/Summary?v=rs11917711	rs11917711	rs11917711	3	0.99	0.01	0	0	0.0002	0.084	-0.12	0.06	C	T	0.15	http://www.ncbi.nlm.nih.gov/sites/entrez?Db=gene&Cmd=ShowDetailView&TermToSearch=90102&ordinalpos=1&itool=EntrezSystem2.PEntrez.Gene.Gene_ResultsPanel.Gene_RVDocSum	PHLDB2	PHLDB2	0	http://www.ncbi.nlm.nih.gov/sites/entrez?Db=gene&Cmd=ShowDetailView&TermToSearch=55347&ordinalpos=1&itool=EntrezSystem2.PEntrez.Gene.Gene_ResultsPanel.Gene_RVDocSum	ABHD10	ABHD10	14	http://www.ncbi.nlm.nih.gov/sites/entrez?Db=gene&Cmd=ShowDetailView&TermToSearch=29114&ordinalpos=1&itool=EntrezSystem2.PEntrez.Gene.Gene_ResultsPanel.Gene_RVDocSum	TAGLN3	TAGLN3	34	2.1	0.1	2.1	-0.2	0.075	0.00013	0.6	0	-0.4	-0.2	0	0.51	0.27	0.12
http://www.ensembl.org/Homo_sapiens/Variation/Summary?v=rs774862	rs774862	rs774862	3	0.99	0.01	0	0	0.00019	0.083	-0.12	0.06	T	G	0.14	http://www.ncbi.nlm.nih.gov/sites/entrez?Db=gene&Cmd=ShowDetailView&TermToSearch=90102&ordinalpos=1&itool=EntrezSystem2.PEntrez.Gene.Gene_ResultsPanel.Gene_RVDocSum	PHLDB2	PHLDB2	0	http://www.ncbi.nlm.nih.gov/sites/entrez?Db=gene&Cmd=ShowDetailView&TermToSearch=55347&ordinalpos=1&itool=EntrezSystem2.PEntrez.Gene.Gene_ResultsPanel.Gene_RVDocSum	ABHD10	ABHD10	13	http://www.ncbi.nlm.nih.gov/sites/entrez?Db=gene&Cmd=ShowDetailView&TermToSearch=29114&ordinalpos=1&itool=EntrezSystem2.PEntrez.Gene.Gene_ResultsPanel.Gene_RVDocSum	TAGLN3	TAGLN3	33	2.1	0.1	2.2	-0.2	0.075	0.00012	0.6	0	-0.4	-0.2	0	0.51	0.26	0.12
http://www.ensembl.org/Homo_sapiens/Variation/Summary?v=rs774861	rs774861	rs774861	3	0.99	0.01	0	0	0.00017	0.11	-0.12	0.05	G	A	0.15	http://www.ncbi.nlm.nih.gov/sites/entrez?Db=gene&Cmd=ShowDetailView&TermToSearch=90102&ordinalpos=1&itool=EntrezSystem2.PEntrez.Gene.Gene_ResultsPanel.Gene_RVDocSum	PHLDB2	PHLDB2	0	http://www.ncbi.nlm.nih.gov/sites/entrez?Db=gene&Cmd=ShowDetailView&TermToSearch=55347&ordinalpos=1&itool=EntrezSystem2.PEntrez.Gene.Gene_ResultsPanel.Gene_RVDocSum	ABHD10	ABHD10	13	http://www.ncbi.nlm.nih.gov/sites/entrez?Db=gene&Cmd=ShowDetailView&TermToSearch=29114&ordinalpos=1&itool=EntrezSystem2.PEntrez.Gene.Gene_ResultsPanel.Gene_RVDocSum	TAGLN3	TAGLN3	33	2.1	0.1	2.1	-0.2	0.076	0.00016	0.48	-0.1	-0.4	-0.3	0.1	0.51	0.37	0.12
http://www.ensembl.org/Homo_sapiens/Variation/Summary?v=rs774860	rs774860	rs774860	3	0.99	0.01	0	0	0.00019	0.082	-0.12	0.06	A	T	0.14	http://www.ncbi.nlm.nih.gov/sites/entrez?Db=gene&Cmd=ShowDetailView&TermToSearch=90102&ordinalpos=1&itool=EntrezSystem2.PEntrez.Gene.Gene_ResultsPanel.Gene_RVDocSum	PHLDB2	PHLDB2	0	http://www.ncbi.nlm.nih.gov/sites/entrez?Db=gene&Cmd=ShowDetailView&TermToSearch=55347&ordinalpos=1&itool=EntrezSystem2.PEntrez.Gene.Gene_ResultsPanel.Gene_RVDocSum	ABHD10	ABHD10	13	http://www.ncbi.nlm.nih.gov/sites/entrez?Db=gene&Cmd=ShowDetailView&TermToSearch=29114&ordinalpos=1&itool=EntrezSystem2.PEntrez.Gene.Gene_ResultsPanel.Gene_RVDocSum	TAGLN3	TAGLN3	32	2.1	0.1	2.2	-0.2	0.078	0.00012	0.58	0	-0.4	-0.2	0	0.51	0.26	0.12
http://www.ensembl.org/Homo_sapiens/Variation/Summary?v=rs774857	rs774857	rs774857	3	0.99	0.01	0	0	0.00016	0.074	-0.13	0.06	T	C	0.15	http://www.ncbi.nlm.nih.gov/sites/entrez?Db=gene&Cmd=ShowDetailView&TermToSearch=90102&ordinalpos=1&itool=EntrezSystem2.PEntrez.Gene.Gene_ResultsPanel.Gene_RVDocSum	PHLDB2	PHLDB2	0	http://www.ncbi.nlm.nih.gov/sites/entrez?Db=gene&Cmd=ShowDetailView&TermToSearch=55347&ordinalpos=1&itool=EntrezSystem2.PEntrez.Gene.Gene_ResultsPanel.Gene_RVDocSum	ABHD10	ABHD10	12	http://www.ncbi.nlm.nih.gov/sites/entrez?Db=gene&Cmd=ShowDetailView&TermToSearch=29114&ordinalpos=1&itool=EntrezSystem2.PEntrez.Gene.Gene_ResultsPanel.Gene_RVDocSum	TAGLN3	TAGLN3	32	2.1	0.1	2.3	-0.2	0.078	8.6e-05	0.58	0	-0.3	-0.2	0	0.46	0.26	0.13
http://www.ensembl.org/Homo_sapiens/Variation/Summary?v=rs774856	rs774856	rs774856	3	0.99	0.01	0	0	0.00019	0.08	-0.12	0.06	A	G	0.14	http://www.ncbi.nlm.nih.gov/sites/entrez?Db=gene&Cmd=ShowDetailView&TermToSearch=90102&ordinalpos=1&itool=EntrezSystem2.PEntrez.Gene.Gene_ResultsPanel.Gene_RVDocSum	PHLDB2	PHLDB2	0	http://www.ncbi.nlm.nih.gov/sites/entrez?Db=gene&Cmd=ShowDetailView&TermToSearch=55347&ordinalpos=1&itool=EntrezSystem2.PEntrez.Gene.Gene_ResultsPanel.Gene_RVDocSum	ABHD10	ABHD10	12	http://www.ncbi.nlm.nih.gov/sites/entrez?Db=gene&Cmd=ShowDetailView&TermToSearch=29114&ordinalpos=1&itool=EntrezSystem2.PEntrez.Gene.Gene_ResultsPanel.Gene_RVDocSum	TAGLN3	TAGLN3	32	2.1	0.1	2.2	-0.2	0.08	0.00012	0.57	0	-0.4	-0.2	0	0.51	0.25	0.12
http://www.ensembl.org/Homo_sapiens/Variation/Summary?v=rs1283003	rs1283003	rs1283003	3	0.99	0.01	0	0	0.00018	0.079	-0.12	0.06	T	A	0.14	http://www.ncbi.nlm.nih.gov/sites/entrez?Db=gene&Cmd=ShowDetailView&TermToSearch=90102&ordinalpos=1&itool=EntrezSystem2.PEntrez.Gene.Gene_ResultsPanel.Gene_RVDocSum	PHLDB2	PHLDB2	0	http://www.ncbi.nlm.nih.gov/sites/entrez?Db=gene&Cmd=ShowDetailView&TermToSearch=55347&ordinalpos=1&itool=EntrezSystem2.PEntrez.Gene.Gene_ResultsPanel.Gene_RVDocSum	ABHD10	ABHD10	12	http://www.ncbi.nlm.nih.gov/sites/entrez?Db=gene&Cmd=ShowDetailView&TermToSearch=29114&ordinalpos=1&itool=EntrezSystem2.PEntrez.Gene.Gene_ResultsPanel.Gene_RVDocSum	TAGLN3	TAGLN3	32	2.1	0.1	2.2	-0.2	0.081	0.00011	0.56	0	-0.4	-0.2	0	0.51	0.25	0.12
http://www.ensembl.org/Homo_sapiens/Variation/Summary?v=rs16858964	rs16858964	rs16858964	3	0.98	0.02	0	0	9.5e-05	0.08	-0.14	0.06	C	T	0.13	http://www.ncbi.nlm.nih.gov/sites/entrez?Db=gene&Cmd=ShowDetailView&TermToSearch=90102&ordinalpos=1&itool=EntrezSystem2.PEntrez.Gene.Gene_ResultsPanel.Gene_RVDocSum	PHLDB2	PHLDB2	0	http://www.ncbi.nlm.nih.gov/sites/entrez?Db=gene&Cmd=ShowDetailView&TermToSearch=55347&ordinalpos=1&itool=EntrezSystem2.PEntrez.Gene.Gene_ResultsPanel.Gene_RVDocSum	ABHD10	ABHD10	11	http://www.ncbi.nlm.nih.gov/sites/entrez?Db=gene&Cmd=ShowDetailView&TermToSearch=29114&ordinalpos=1&itool=EntrezSystem2.PEntrez.Gene.Gene_ResultsPanel.Gene_RVDocSum	TAGLN3	TAGLN3	30	2.3	0	2.2	-0.1	0.1	0.0001	0.32	0	-0.3	-0.1	-0.1	0.45	0.2	0.27
http://www.ensembl.org/Homo_sapiens/Variation/Summary?v=rs774854	rs774854	rs774854	3	0.92	0.07	0	0.01	1.8e-05	0.065	-0.13	0.05	T	C	0.19	http://www.ncbi.nlm.nih.gov/sites/entrez?Db=gene&Cmd=ShowDetailView&TermToSearch=90102&ordinalpos=1&itool=EntrezSystem2.PEntrez.Gene.Gene_ResultsPanel.Gene_RVDocSum	PHLDB2	PHLDB2	0	http://www.ncbi.nlm.nih.gov/sites/entrez?Db=gene&Cmd=ShowDetailView&TermToSearch=55347&ordinalpos=1&itool=EntrezSystem2.PEntrez.Gene.Gene_ResultsPanel.Gene_RVDocSum	ABHD10	ABHD10	9	http://www.ncbi.nlm.nih.gov/sites/entrez?Db=gene&Cmd=ShowDetailView&TermToSearch=29114&ordinalpos=1&itool=EntrezSystem2.PEntrez.Gene.Gene_ResultsPanel.Gene_RVDocSum	TAGLN3	TAGLN3	29	2.9	-0.1	3.2	0.1	0.13	7.3e-06	0.1	0	-0.4	-0.1	0	0.5	0.18	0.13
http://www.ensembl.org/Homo_sapiens/Variation/Summary?v=rs581126	rs581126	rs581126	3	0.93	0.06	0	0.01	2.1e-05	0.079	-0.12	0.05	G	C	0.18	http://www.ncbi.nlm.nih.gov/sites/entrez?Db=gene&Cmd=ShowDetailView&TermToSearch=90102&ordinalpos=1&itool=EntrezSystem2.PEntrez.Gene.Gene_ResultsPanel.Gene_RVDocSum	PHLDB2	PHLDB2	0	http://www.ncbi.nlm.nih.gov/sites/entrez?Db=gene&Cmd=ShowDetailView&TermToSearch=55347&ordinalpos=1&itool=EntrezSystem2.PEntrez.Gene.Gene_ResultsPanel.Gene_RVDocSum	ABHD10	ABHD10	8	http://www.ncbi.nlm.nih.gov/sites/entrez?Db=gene&Cmd=ShowDetailView&TermToSearch=29114&ordinalpos=1&itool=EntrezSystem2.PEntrez.Gene.Gene_ResultsPanel.Gene_RVDocSum	TAGLN3	TAGLN3	28	2.9	-0.1	3.1	0.1	0.13	8.4e-06	0.11	-0.1	-0.4	-0.2	0	0.5	0.21	0.15
http://www.ensembl.org/Homo_sapiens/Variation/Summary?v=rs529159	rs529159	rs529159	3	0.93	0.06	0	0.01	2.1e-05	0.085	-0.13	0.05	A	G	0.18	http://www.ncbi.nlm.nih.gov/sites/entrez?Db=gene&Cmd=ShowDetailView&TermToSearch=90102&ordinalpos=1&itool=EntrezSystem2.PEntrez.Gene.Gene_ResultsPanel.Gene_RVDocSum	PHLDB2	PHLDB2	0	http://www.ncbi.nlm.nih.gov/sites/entrez?Db=gene&Cmd=ShowDetailView&TermToSearch=55347&ordinalpos=1&itool=EntrezSystem2.PEntrez.Gene.Gene_ResultsPanel.Gene_RVDocSum	ABHD10	ABHD10	7	http://www.ncbi.nlm.nih.gov/sites/entrez?Db=gene&Cmd=ShowDetailView&TermToSearch=29114&ordinalpos=1&itool=EntrezSystem2.PEntrez.Gene.Gene_ResultsPanel.Gene_RVDocSum	TAGLN3	TAGLN3	27	2.9	-0.1	3.1	0.1	0.13	8.5e-06	0.11	-0.1	-0.4	-0.2	0	0.5	0.22	0.15
http://www.ensembl.org/Homo_sapiens/Variation/Summary?v=rs9819844	rs9819844	rs9819844	3	0.95	0.05	0	0	3e-05	0.94	-0.14	0	T	C	0.25	http://www.ncbi.nlm.nih.gov/sites/entrez?Db=gene&Cmd=ShowDetailView&TermToSearch=285195&ordinalpos=1&itool=EntrezSystem2.PEntrez.Gene.Gene_ResultsPanel.Gene_RVDocSum	SLC9A9	SLC9A9	0	http://www.ncbi.nlm.nih.gov/sites/entrez?Db=gene&Cmd=ShowDetailView&TermToSearch=257039&ordinalpos=1&itool=EntrezSystem2.PEntrez.Gene.Gene_ResultsPanel.Gene_RVDocSum	LOC257039	LOC257039	134	http://www.ncbi.nlm.nih.gov/sites/entrez?Db=gene&Cmd=ShowDetailView&TermToSearch=645515&ordinalpos=1&itool=EntrezSystem2.PEntrez.Gene.Gene_ResultsPanel.Gene_RVDocSum	LOC645515	LOC645515	203	2.8	2.2	-0.2	0.3	0.00011	0.33	0.06	-0.6	-0.5	-0.2	-0.2	0.69	0.34	0.5
rs-link	rsnum	SNP	chr	HO	HS	HD	HS+D	P-value-S	P-value-D	Effect-S	Effect-D	Minor Allele	Major Allele	MAF	GENE1-link	GENE1	GENE1	dist1 (Kb)	GENE2-link	GENE2	GENE2	dist2 (Kb)	GENE3-link	GENE3	GENE3	dist3 (Kb)	log10BF-S	log10BF-S-TNT	log10BF-S-PRINCE	log10BF-S-CAP	P-value-S-TNT	P-value-S-PRINCE	P-value-S-CAP	log10BF-D	log10BF-D-TNT	log10BF-D-PRINCE	log10BF-D-CAP	P-value-D-TNT	P-value-D-PRINCE	P-value-D-CAP
http://www.ensembl.org/Homo_sapiens/Variation/Summary?v=rs6807319	rs6807319	rs6807319	3	0.93	0.06	0	0	3e-05	0.98	-0.13	0	T	G	0.28	http://www.ncbi.nlm.nih.gov/sites/entrez?Db=gene&Cmd=ShowDetailView&TermToSearch=285195&ordinalpos=1&itool=EntrezSystem2.PEntrez.Gene.Gene_ResultsPanel.Gene_RVDocSum	SLC9A9	SLC9A9	0	http://www.ncbi.nlm.nih.gov/sites/entrez?Db=gene&Cmd=ShowDetailView&TermToSearch=257039&ordinalpos=1&itool=EntrezSystem2.PEntrez.Gene.Gene_ResultsPanel.Gene_RVDocSum	LOC257039	LOC257039	134	http://www.ncbi.nlm.nih.gov/sites/entrez?Db=gene&Cmd=ShowDetailView&TermToSearch=645515&ordinalpos=1&itool=EntrezSystem2.PEntrez.Gene.Gene_ResultsPanel.Gene_RVDocSum	LOC645515	LOC645515	204	2.9	1.7	0	0.3	0.00044	0.12	0.071	-0.6	-0.5	-0.3	-0.2	0.85	0.5	0.53
http://www.ensembl.org/Homo_sapiens/Variation/Summary?v=rs7645194	rs7645194	rs7645194	3	0.98	0.02	0	0	0.00011	0.071	-0.15	-0.07	A	G	0.1	http://www.ncbi.nlm.nih.gov/sites/entrez?Db=gene&Cmd=ShowDetailView&TermToSearch=344758&ordinalpos=1&itool=EntrezSystem2.PEntrez.Gene.Gene_ResultsPanel.Gene_RVDocSum	GPR149	GPR149	99	http://www.ncbi.nlm.nih.gov/sites/entrez?Db=gene&Cmd=ShowDetailView&TermToSearch=170506&ordinalpos=1&itool=EntrezSystem2.PEntrez.Gene.Gene_ResultsPanel.Gene_RVDocSum	DHX36	DHX36	205	http://www.ncbi.nlm.nih.gov/sites/entrez?Db=gene&Cmd=ShowDetailView&TermToSearch=26084&ordinalpos=1&itool=EntrezSystem2.PEntrez.Gene.Gene_ResultsPanel.Gene_RVDocSum	SGEF	SGEF	273	2.3	2.7	-0.3	0.1	2.9e-05	0.65	0.11	0.1	-0.4	-0.2	1	0.9	0.39	0.0028
http://www.ensembl.org/Homo_sapiens/Variation/Summary?v=rs6769056	rs6769056	rs6769056	3	0.98	0.02	0	0	0.00011	0.072	-0.15	-0.07	G	T	0.1	http://www.ncbi.nlm.nih.gov/sites/entrez?Db=gene&Cmd=ShowDetailView&TermToSearch=344758&ordinalpos=1&itool=EntrezSystem2.PEntrez.Gene.Gene_ResultsPanel.Gene_RVDocSum	GPR149	GPR149	101	http://www.ncbi.nlm.nih.gov/sites/entrez?Db=gene&Cmd=ShowDetailView&TermToSearch=170506&ordinalpos=1&itool=EntrezSystem2.PEntrez.Gene.Gene_ResultsPanel.Gene_RVDocSum	DHX36	DHX36	206	http://www.ncbi.nlm.nih.gov/sites/entrez?Db=gene&Cmd=ShowDetailView&TermToSearch=26084&ordinalpos=1&itool=EntrezSystem2.PEntrez.Gene.Gene_ResultsPanel.Gene_RVDocSum	SGEF	SGEF	274	2.3	2.7	-0.3	0.1	3e-05	0.65	0.11	0.1	-0.4	-0.2	1	0.9	0.39	0.0028
http://www.ensembl.org/Homo_sapiens/Variation/Summary?v=rs11927330	rs11927330	rs11927330	3	0.98	0.02	0	0	0.00011	0.073	-0.15	-0.07	C	G	0.1	http://www.ncbi.nlm.nih.gov/sites/entrez?Db=gene&Cmd=ShowDetailView&TermToSearch=344758&ordinalpos=1&itool=EntrezSystem2.PEntrez.Gene.Gene_ResultsPanel.Gene_RVDocSum	GPR149	GPR149	102	http://www.ncbi.nlm.nih.gov/sites/entrez?Db=gene&Cmd=ShowDetailView&TermToSearch=170506&ordinalpos=1&itool=EntrezSystem2.PEntrez.Gene.Gene_ResultsPanel.Gene_RVDocSum	DHX36	DHX36	207	http://www.ncbi.nlm.nih.gov/sites/entrez?Db=gene&Cmd=ShowDetailView&TermToSearch=26084&ordinalpos=1&itool=EntrezSystem2.PEntrez.Gene.Gene_ResultsPanel.Gene_RVDocSum	SGEF	SGEF	275	2.3	2.7	-0.3	0.1	3e-05	0.67	0.11	0.1	-0.4	-0.2	1	0.9	0.39	0.0028
http://www.ensembl.org/Homo_sapiens/Variation/Summary?v=rs11915189	rs11915189	rs11915189	3	0.98	0.02	0	0	0.00011	0.074	-0.15	-0.07	T	C	0.1	http://www.ncbi.nlm.nih.gov/sites/entrez?Db=gene&Cmd=ShowDetailView&TermToSearch=344758&ordinalpos=1&itool=EntrezSystem2.PEntrez.Gene.Gene_ResultsPanel.Gene_RVDocSum	GPR149	GPR149	105	http://www.ncbi.nlm.nih.gov/sites/entrez?Db=gene&Cmd=ShowDetailView&TermToSearch=170506&ordinalpos=1&itool=EntrezSystem2.PEntrez.Gene.Gene_ResultsPanel.Gene_RVDocSum	DHX36	DHX36	210	http://www.ncbi.nlm.nih.gov/sites/entrez?Db=gene&Cmd=ShowDetailView&TermToSearch=26084&ordinalpos=1&itool=EntrezSystem2.PEntrez.Gene.Gene_ResultsPanel.Gene_RVDocSum	SGEF	SGEF	278	2.3	2.7	-0.3	0.1	2.9e-05	0.68	0.11	0.1	-0.4	-0.2	1	0.91	0.39	0.0028
http://www.ensembl.org/Homo_sapiens/Variation/Summary?v=rs11916232	rs11916232	rs11916232	3	0.97	0.03	0	0	6.2e-05	0.091	-0.17	-0.07	G	C	0.09	http://www.ncbi.nlm.nih.gov/sites/entrez?Db=gene&Cmd=ShowDetailView&TermToSearch=344758&ordinalpos=1&itool=EntrezSystem2.PEntrez.Gene.Gene_ResultsPanel.Gene_RVDocSum	GPR149	GPR149	106	http://www.ncbi.nlm.nih.gov/sites/entrez?Db=gene&Cmd=ShowDetailView&TermToSearch=170506&ordinalpos=1&itool=EntrezSystem2.PEntrez.Gene.Gene_ResultsPanel.Gene_RVDocSum	DHX36	DHX36	211	http://www.ncbi.nlm.nih.gov/sites/entrez?Db=gene&Cmd=ShowDetailView&TermToSearch=26084&ordinalpos=1&itool=EntrezSystem2.PEntrez.Gene.Gene_ResultsPanel.Gene_RVDocSum	SGEF	SGEF	279	2.5	2.8	-0.3	0.1	1.9e-05	0.61	0.098	0	-0.3	-0.2	1	1	0.4	0.0028
http://www.ensembl.org/Homo_sapiens/Variation/Summary?v=rs1159967	rs1159967	rs1159967	3	0.98	0.02	0	0	0.00011	0.076	-0.15	-0.07	T	C	0.1	http://www.ncbi.nlm.nih.gov/sites/entrez?Db=gene&Cmd=ShowDetailView&TermToSearch=344758&ordinalpos=1&itool=EntrezSystem2.PEntrez.Gene.Gene_ResultsPanel.Gene_RVDocSum	GPR149	GPR149	106	http://www.ncbi.nlm.nih.gov/sites/entrez?Db=gene&Cmd=ShowDetailView&TermToSearch=170506&ordinalpos=1&itool=EntrezSystem2.PEntrez.Gene.Gene_ResultsPanel.Gene_RVDocSum	DHX36	DHX36	211	http://www.ncbi.nlm.nih.gov/sites/entrez?Db=gene&Cmd=ShowDetailView&TermToSearch=26084&ordinalpos=1&itool=EntrezSystem2.PEntrez.Gene.Gene_ResultsPanel.Gene_RVDocSum	SGEF	SGEF	279	2.3	2.7	-0.3	0.1	2.9e-05	0.69	0.11	0.1	-0.4	-0.2	1	0.92	0.38	0.0028
http://www.ensembl.org/Homo_sapiens/Variation/Summary?v=rs17437364	rs17437364	rs17437364	3	0.98	0.02	0	0	0.00011	0.083	-0.15	-0.07	A	T	0.1	http://www.ncbi.nlm.nih.gov/sites/entrez?Db=gene&Cmd=ShowDetailView&TermToSearch=344758&ordinalpos=1&itool=EntrezSystem2.PEntrez.Gene.Gene_ResultsPanel.Gene_RVDocSum	GPR149	GPR149	110	http://www.ncbi.nlm.nih.gov/sites/entrez?Db=gene&Cmd=ShowDetailView&TermToSearch=170506&ordinalpos=1&itool=EntrezSystem2.PEntrez.Gene.Gene_ResultsPanel.Gene_RVDocSum	DHX36	DHX36	216	http://www.ncbi.nlm.nih.gov/sites/entrez?Db=gene&Cmd=ShowDetailView&TermToSearch=26084&ordinalpos=1&itool=EntrezSystem2.PEntrez.Gene.Gene_ResultsPanel.Gene_RVDocSum	SGEF	SGEF	283	2.3	2.7	-0.3	0.1	3.3e-05	0.67	0.11	0	-0.4	-0.2	1	0.97	0.36	0.0029
http://www.ensembl.org/Homo_sapiens/Variation/Summary?v=rs1160335	rs1160335	rs1160335	3	0.98	0.02	0	0	0.0001	0.082	-0.15	-0.07	T	G	0.1	http://www.ncbi.nlm.nih.gov/sites/entrez?Db=gene&Cmd=ShowDetailView&TermToSearch=344758&ordinalpos=1&itool=EntrezSystem2.PEntrez.Gene.Gene_ResultsPanel.Gene_RVDocSum	GPR149	GPR149	111	http://www.ncbi.nlm.nih.gov/sites/entrez?Db=gene&Cmd=ShowDetailView&TermToSearch=170506&ordinalpos=1&itool=EntrezSystem2.PEntrez.Gene.Gene_ResultsPanel.Gene_RVDocSum	DHX36	DHX36	217	http://www.ncbi.nlm.nih.gov/sites/entrez?Db=gene&Cmd=ShowDetailView&TermToSearch=26084&ordinalpos=1&itool=EntrezSystem2.PEntrez.Gene.Gene_ResultsPanel.Gene_RVDocSum	SGEF	SGEF	285	2.3	2.7	-0.3	0.1	3.1e-05	0.65	0.12	0	-0.4	-0.2	1	0.97	0.35	0.003
http://www.ensembl.org/Homo_sapiens/Variation/Summary?v=rs980023	rs980023	rs980023	3	0.98	0.02	0	0	8e-05	0.087	-0.15	-0.07	C	T	0.11	http://www.ncbi.nlm.nih.gov/sites/entrez?Db=gene&Cmd=ShowDetailView&TermToSearch=344758&ordinalpos=1&itool=EntrezSystem2.PEntrez.Gene.Gene_ResultsPanel.Gene_RVDocSum	GPR149	GPR149	128	http://www.ncbi.nlm.nih.gov/sites/entrez?Db=gene&Cmd=ShowDetailView&TermToSearch=170506&ordinalpos=1&itool=EntrezSystem2.PEntrez.Gene.Gene_ResultsPanel.Gene_RVDocSum	DHX36	DHX36	233	http://www.ncbi.nlm.nih.gov/sites/entrez?Db=gene&Cmd=ShowDetailView&TermToSearch=26084&ordinalpos=1&itool=EntrezSystem2.PEntrez.Gene.Gene_ResultsPanel.Gene_RVDocSum	SGEF	SGEF	301	2.4	2.9	-0.3	0.1	1.4e-05	0.64	0.11	0	-0.4	-0.2	0.6	0.92	0.32	0.011
http://www.ensembl.org/Homo_sapiens/Variation/Summary?v=rs980026	rs980026	rs980026	3	0.98	0.02	0	0	8e-05	0.086	-0.15	-0.07	T	G	0.11	http://www.ncbi.nlm.nih.gov/sites/entrez?Db=gene&Cmd=ShowDetailView&TermToSearch=344758&ordinalpos=1&itool=EntrezSystem2.PEntrez.Gene.Gene_ResultsPanel.Gene_RVDocSum	GPR149	GPR149	128	http://www.ncbi.nlm.nih.gov/sites/entrez?Db=gene&Cmd=ShowDetailView&TermToSearch=170506&ordinalpos=1&itool=EntrezSystem2.PEntrez.Gene.Gene_ResultsPanel.Gene_RVDocSum	DHX36	DHX36	234	http://www.ncbi.nlm.nih.gov/sites/entrez?Db=gene&Cmd=ShowDetailView&TermToSearch=26084&ordinalpos=1&itool=EntrezSystem2.PEntrez.Gene.Gene_ResultsPanel.Gene_RVDocSum	SGEF	SGEF	302	2.4	2.9	-0.3	0.1	1.4e-05	0.64	0.11	0	-0.4	-0.2	0.6	0.92	0.32	0.011
http://www.ensembl.org/Homo_sapiens/Variation/Summary?v=rs2314058	rs2314058	rs2314058	3	0.97	0.03	0	0	6.3e-05	0.087	-0.16	-0.07	T	G	0.11	http://www.ncbi.nlm.nih.gov/sites/entrez?Db=gene&Cmd=ShowDetailView&TermToSearch=344758&ordinalpos=1&itool=EntrezSystem2.PEntrez.Gene.Gene_ResultsPanel.Gene_RVDocSum	GPR149	GPR149	130	http://www.ncbi.nlm.nih.gov/sites/entrez?Db=gene&Cmd=ShowDetailView&TermToSearch=170506&ordinalpos=1&itool=EntrezSystem2.PEntrez.Gene.Gene_ResultsPanel.Gene_RVDocSum	DHX36	DHX36	236	http://www.ncbi.nlm.nih.gov/sites/entrez?Db=gene&Cmd=ShowDetailView&TermToSearch=26084&ordinalpos=1&itool=EntrezSystem2.PEntrez.Gene.Gene_ResultsPanel.Gene_RVDocSum	SGEF	SGEF	304	2.5	3	-0.3	0.1	1.3e-05	0.64	0.096	0	-0.4	-0.2	0.6	0.92	0.31	0.012
http://www.ensembl.org/Homo_sapiens/Variation/Summary?v=rs2313950	rs2313950	rs2313950	3	0.97	0.03	0	0	6.2e-05	0.089	-0.16	-0.07	C	T	0.11	http://www.ncbi.nlm.nih.gov/sites/entrez?Db=gene&Cmd=ShowDetailView&TermToSearch=344758&ordinalpos=1&itool=EntrezSystem2.PEntrez.Gene.Gene_ResultsPanel.Gene_RVDocSum	GPR149	GPR149	132	http://www.ncbi.nlm.nih.gov/sites/entrez?Db=gene&Cmd=ShowDetailView&TermToSearch=170506&ordinalpos=1&itool=EntrezSystem2.PEntrez.Gene.Gene_ResultsPanel.Gene_RVDocSum	DHX36	DHX36	237	http://www.ncbi.nlm.nih.gov/sites/entrez?Db=gene&Cmd=ShowDetailView&TermToSearch=26084&ordinalpos=1&itool=EntrezSystem2.PEntrez.Gene.Gene_ResultsPanel.Gene_RVDocSum	SGEF	SGEF	305	2.5	3	-0.3	0.1	1.3e-05	0.63	0.095	0	-0.4	-0.2	0.6	0.92	0.31	0.012
http://www.ensembl.org/Homo_sapiens/Variation/Summary?v=rs11928294	rs11928294	rs11928294	3	0.97	0.03	0	0	6.2e-05	0.09	-0.16	-0.07	T	C	0.11	http://www.ncbi.nlm.nih.gov/sites/entrez?Db=gene&Cmd=ShowDetailView&TermToSearch=344758&ordinalpos=1&itool=EntrezSystem2.PEntrez.Gene.Gene_ResultsPanel.Gene_RVDocSum	GPR149	GPR149	132	http://www.ncbi.nlm.nih.gov/sites/entrez?Db=gene&Cmd=ShowDetailView&TermToSearch=170506&ordinalpos=1&itool=EntrezSystem2.PEntrez.Gene.Gene_ResultsPanel.Gene_RVDocSum	DHX36	DHX36	238	http://www.ncbi.nlm.nih.gov/sites/entrez?Db=gene&Cmd=ShowDetailView&TermToSearch=26084&ordinalpos=1&itool=EntrezSystem2.PEntrez.Gene.Gene_ResultsPanel.Gene_RVDocSum	SGEF	SGEF	306	2.5	3	-0.3	0.1	1.3e-05	0.64	0.095	0	-0.4	-0.2	0.6	0.93	0.31	0.012
http://www.ensembl.org/Homo_sapiens/Variation/Summary?v=rs10513461	rs10513461	rs10513461	3	0.97	0.03	0	0	6e-05	0.091	-0.16	-0.07	A	G	0.11	http://www.ncbi.nlm.nih.gov/sites/entrez?Db=gene&Cmd=ShowDetailView&TermToSearch=344758&ordinalpos=1&itool=EntrezSystem2.PEntrez.Gene.Gene_ResultsPanel.Gene_RVDocSum	GPR149	GPR149	134	http://www.ncbi.nlm.nih.gov/sites/entrez?Db=gene&Cmd=ShowDetailView&TermToSearch=170506&ordinalpos=1&itool=EntrezSystem2.PEntrez.Gene.Gene_ResultsPanel.Gene_RVDocSum	DHX36	DHX36	239	http://www.ncbi.nlm.nih.gov/sites/entrez?Db=gene&Cmd=ShowDetailView&TermToSearch=26084&ordinalpos=1&itool=EntrezSystem2.PEntrez.Gene.Gene_ResultsPanel.Gene_RVDocSum	SGEF	SGEF	307	2.5	3	-0.3	0.1	1.3e-05	0.63	0.094	0	-0.4	-0.2	0.6	0.93	0.31	0.012
http://www.ensembl.org/Homo_sapiens/Variation/Summary?v=rs11921298	rs11921298	rs11921298	3	0.97	0.03	0	0	6.4e-05	0.1	-0.16	-0.06	C	T	0.11	http://www.ncbi.nlm.nih.gov/sites/entrez?Db=gene&Cmd=ShowDetailView&TermToSearch=344758&ordinalpos=1&itool=EntrezSystem2.PEntrez.Gene.Gene_ResultsPanel.Gene_RVDocSum	GPR149	GPR149	142	http://www.ncbi.nlm.nih.gov/sites/entrez?Db=gene&Cmd=ShowDetailView&TermToSearch=170506&ordinalpos=1&itool=EntrezSystem2.PEntrez.Gene.Gene_ResultsPanel.Gene_RVDocSum	DHX36	DHX36	248	http://www.ncbi.nlm.nih.gov/sites/entrez?Db=gene&Cmd=ShowDetailView&TermToSearch=26084&ordinalpos=1&itool=EntrezSystem2.PEntrez.Gene.Gene_ResultsPanel.Gene_RVDocSum	SGEF	SGEF	315	2.5	3	-0.3	0.1	1.1e-05	0.64	0.088	0	-0.4	-0.2	0.6	0.96	0.34	0.014
http://www.ensembl.org/Homo_sapiens/Variation/Summary?v=rs7633033	rs7633033	rs7633033	3	0.98	0.02	0	0	7.6e-05	0.1	-0.15	-0.06	G	A	0.11	http://www.ncbi.nlm.nih.gov/sites/entrez?Db=gene&Cmd=ShowDetailView&TermToSearch=344758&ordinalpos=1&itool=EntrezSystem2.PEntrez.Gene.Gene_ResultsPanel.Gene_RVDocSum	GPR149	GPR149	143	http://www.ncbi.nlm.nih.gov/sites/entrez?Db=gene&Cmd=ShowDetailView&TermToSearch=170506&ordinalpos=1&itool=EntrezSystem2.PEntrez.Gene.Gene_ResultsPanel.Gene_RVDocSum	DHX36	DHX36	248	http://www.ncbi.nlm.nih.gov/sites/entrez?Db=gene&Cmd=ShowDetailView&TermToSearch=26084&ordinalpos=1&itool=EntrezSystem2.PEntrez.Gene.Gene_ResultsPanel.Gene_RVDocSum	SGEF	SGEF	316	2.4	3	-0.3	0.1	1.1e-05	0.66	0.089	0	-0.4	-0.2	0.6	0.98	0.34	0.014
http://www.ensembl.org/Homo_sapiens/Variation/Summary?v=rs7611470	rs7611470	rs7611470	3	0.98	0.02	0	0	7.7e-05	0.1	-0.15	-0.06	A	G	0.11	http://www.ncbi.nlm.nih.gov/sites/entrez?Db=gene&Cmd=ShowDetailView&TermToSearch=344758&ordinalpos=1&itool=EntrezSystem2.PEntrez.Gene.Gene_ResultsPanel.Gene_RVDocSum	GPR149	GPR149	143	http://www.ncbi.nlm.nih.gov/sites/entrez?Db=gene&Cmd=ShowDetailView&TermToSearch=170506&ordinalpos=1&itool=EntrezSystem2.PEntrez.Gene.Gene_ResultsPanel.Gene_RVDocSum	DHX36	DHX36	249	http://www.ncbi.nlm.nih.gov/sites/entrez?Db=gene&Cmd=ShowDetailView&TermToSearch=26084&ordinalpos=1&itool=EntrezSystem2.PEntrez.Gene.Gene_ResultsPanel.Gene_RVDocSum	SGEF	SGEF	316	2.4	3	-0.3	0.1	1.1e-05	0.66	0.09	0	-0.4	-0.2	0.6	0.98	0.34	0.014
http://www.ensembl.org/Homo_sapiens/Variation/Summary?v=rs7633236	rs7633236	rs7633236	3	0.98	0.02	0	0	8e-05	0.1	-0.15	-0.06	G	A	0.11	http://www.ncbi.nlm.nih.gov/sites/entrez?Db=gene&Cmd=ShowDetailView&TermToSearch=344758&ordinalpos=1&itool=EntrezSystem2.PEntrez.Gene.Gene_ResultsPanel.Gene_RVDocSum	GPR149	GPR149	143	http://www.ncbi.nlm.nih.gov/sites/entrez?Db=gene&Cmd=ShowDetailView&TermToSearch=170506&ordinalpos=1&itool=EntrezSystem2.PEntrez.Gene.Gene_ResultsPanel.Gene_RVDocSum	DHX36	DHX36	249	http://www.ncbi.nlm.nih.gov/sites/entrez?Db=gene&Cmd=ShowDetailView&TermToSearch=26084&ordinalpos=1&itool=EntrezSystem2.PEntrez.Gene.Gene_ResultsPanel.Gene_RVDocSum	SGEF	SGEF	317	2.4	3	-0.3	0.1	1.1e-05	0.66	0.09	0	-0.4	-0.2	0.6	0.98	0.35	0.014
http://www.ensembl.org/Homo_sapiens/Variation/Summary?v=rs7623517	rs7623517	rs7623517	3	0.97	0.03	0	0	6.5e-05	0.11	-0.16	-0.06	C	T	0.11	http://www.ncbi.nlm.nih.gov/sites/entrez?Db=gene&Cmd=ShowDetailView&TermToSearch=344758&ordinalpos=1&itool=EntrezSystem2.PEntrez.Gene.Gene_ResultsPanel.Gene_RVDocSum	GPR149	GPR149	144	http://www.ncbi.nlm.nih.gov/sites/entrez?Db=gene&Cmd=ShowDetailView&TermToSearch=170506&ordinalpos=1&itool=EntrezSystem2.PEntrez.Gene.Gene_ResultsPanel.Gene_RVDocSum	DHX36	DHX36	249	http://www.ncbi.nlm.nih.gov/sites/entrez?Db=gene&Cmd=ShowDetailView&TermToSearch=26084&ordinalpos=1&itool=EntrezSystem2.PEntrez.Gene.Gene_ResultsPanel.Gene_RVDocSum	SGEF	SGEF	317	2.5	3	-0.3	0.1	1.1e-05	0.65	0.086	0	-0.4	-0.2	0.5	0.99	0.34	0.014
http://www.ensembl.org/Homo_sapiens/Variation/Summary?v=rs7612082	rs7612082	rs7612082	3	0.97	0.03	0	0	5.6e-05	0.11	-0.16	-0.06	C	G	0.1	http://www.ncbi.nlm.nih.gov/sites/entrez?Db=gene&Cmd=ShowDetailView&TermToSearch=344758&ordinalpos=1&itool=EntrezSystem2.PEntrez.Gene.Gene_ResultsPanel.Gene_RVDocSum	GPR149	GPR149	144	http://www.ncbi.nlm.nih.gov/sites/entrez?Db=gene&Cmd=ShowDetailView&TermToSearch=170506&ordinalpos=1&itool=EntrezSystem2.PEntrez.Gene.Gene_ResultsPanel.Gene_RVDocSum	DHX36	DHX36	249	http://www.ncbi.nlm.nih.gov/sites/entrez?Db=gene&Cmd=ShowDetailView&TermToSearch=26084&ordinalpos=1&itool=EntrezSystem2.PEntrez.Gene.Gene_ResultsPanel.Gene_RVDocSum	SGEF	SGEF	317	2.5	3	-0.3	0.1	1.1e-05	0.63	0.083	-0.1	-0.4	-0.2	0.5	0.99	0.34	0.015
http://www.ensembl.org/Homo_sapiens/Variation/Summary?v=rs7614327	rs7614327	rs7614327	3	0.97	0.03	0	0	5.6e-05	0.11	-0.16	-0.06	A	G	0.1	http://www.ncbi.nlm.nih.gov/sites/entrez?Db=gene&Cmd=ShowDetailView&TermToSearch=344758&ordinalpos=1&itool=EntrezSystem2.PEntrez.Gene.Gene_ResultsPanel.Gene_RVDocSum	GPR149	GPR149	144	http://www.ncbi.nlm.nih.gov/sites/entrez?Db=gene&Cmd=ShowDetailView&TermToSearch=170506&ordinalpos=1&itool=EntrezSystem2.PEntrez.Gene.Gene_ResultsPanel.Gene_RVDocSum	DHX36	DHX36	249	http://www.ncbi.nlm.nih.gov/sites/entrez?Db=gene&Cmd=ShowDetailView&TermToSearch=26084&ordinalpos=1&itool=EntrezSystem2.PEntrez.Gene.Gene_ResultsPanel.Gene_RVDocSum	SGEF	SGEF	317	2.5	3	-0.3	0.1	1.1e-05	0.63	0.084	-0.1	-0.4	-0.2	0.5	1	0.34	0.015
http://www.ensembl.org/Homo_sapiens/Variation/Summary?v=rs7626254	rs7626254	rs7626254	3	0.97	0.03	0	0	6e-05	0.12	-0.16	-0.06	C	T	0.1	http://www.ncbi.nlm.nih.gov/sites/entrez?Db=gene&Cmd=ShowDetailView&TermToSearch=344758&ordinalpos=1&itool=EntrezSystem2.PEntrez.Gene.Gene_ResultsPanel.Gene_RVDocSum	GPR149	GPR149	144	http://www.ncbi.nlm.nih.gov/sites/entrez?Db=gene&Cmd=ShowDetailView&TermToSearch=170506&ordinalpos=1&itool=EntrezSystem2.PEntrez.Gene.Gene_ResultsPanel.Gene_RVDocSum	DHX36	DHX36	250	http://www.ncbi.nlm.nih.gov/sites/entrez?Db=gene&Cmd=ShowDetailView&TermToSearch=26084&ordinalpos=1&itool=EntrezSystem2.PEntrez.Gene.Gene_ResultsPanel.Gene_RVDocSum	SGEF	SGEF	318	2.5	3	-0.3	0.1	1e-05	0.65	0.087	-0.1	-0.4	-0.2	0.5	0.96	0.34	0.014
http://www.ensembl.org/Homo_sapiens/Variation/Summary?v=rs6440946	rs6440946	rs6440946	3	0.96	0.04	0	0	3.7e-05	0.12	-0.17	-0.06	T	G	0.11	http://www.ncbi.nlm.nih.gov/sites/entrez?Db=gene&Cmd=ShowDetailView&TermToSearch=344758&ordinalpos=1&itool=EntrezSystem2.PEntrez.Gene.Gene_ResultsPanel.Gene_RVDocSum	GPR149	GPR149	145	http://www.ncbi.nlm.nih.gov/sites/entrez?Db=gene&Cmd=ShowDetailView&TermToSearch=170506&ordinalpos=1&itool=EntrezSystem2.PEntrez.Gene.Gene_ResultsPanel.Gene_RVDocSum	DHX36	DHX36	250	http://www.ncbi.nlm.nih.gov/sites/entrez?Db=gene&Cmd=ShowDetailView&TermToSearch=26084&ordinalpos=1&itool=EntrezSystem2.PEntrez.Gene.Gene_ResultsPanel.Gene_RVDocSum	SGEF	SGEF	318	2.7	3.1	-0.3	0.1	8.6e-06	0.58	0.1	-0.1	-0.4	-0.2	0.5	0.95	0.32	0.013
http://www.ensembl.org/Homo_sapiens/Variation/Summary?v=rs7614819	rs7614819	rs7614819	3	0.95	0.04	0	0	3.6e-05	0.12	-0.17	-0.06	T	C	0.1	http://www.ncbi.nlm.nih.gov/sites/entrez?Db=gene&Cmd=ShowDetailView&TermToSearch=344758&ordinalpos=1&itool=EntrezSystem2.PEntrez.Gene.Gene_ResultsPanel.Gene_RVDocSum	GPR149	GPR149	145	http://www.ncbi.nlm.nih.gov/sites/entrez?Db=gene&Cmd=ShowDetailView&TermToSearch=170506&ordinalpos=1&itool=EntrezSystem2.PEntrez.Gene.Gene_ResultsPanel.Gene_RVDocSum	DHX36	DHX36	250	http://www.ncbi.nlm.nih.gov/sites/entrez?Db=gene&Cmd=ShowDetailView&TermToSearch=26084&ordinalpos=1&itool=EntrezSystem2.PEntrez.Gene.Gene_ResultsPanel.Gene_RVDocSum	SGEF	SGEF	318	2.7	3	-0.3	0.1	1e-05	0.56	0.1	-0.1	-0.4	-0.2	0.6	0.96	0.34	0.011
http://www.ensembl.org/Homo_sapiens/Variation/Summary?v=rs7626504	rs7626504	rs7626504	3	0.95	0.05	0	0	3.3e-05	0.12	-0.17	-0.06	C	T	0.1	http://www.ncbi.nlm.nih.gov/sites/entrez?Db=gene&Cmd=ShowDetailView&TermToSearch=344758&ordinalpos=1&itool=EntrezSystem2.PEntrez.Gene.Gene_ResultsPanel.Gene_RVDocSum	GPR149	GPR149	145	http://www.ncbi.nlm.nih.gov/sites/entrez?Db=gene&Cmd=ShowDetailView&TermToSearch=170506&ordinalpos=1&itool=EntrezSystem2.PEntrez.Gene.Gene_ResultsPanel.Gene_RVDocSum	DHX36	DHX36	250	http://www.ncbi.nlm.nih.gov/sites/entrez?Db=gene&Cmd=ShowDetailView&TermToSearch=26084&ordinalpos=1&itool=EntrezSystem2.PEntrez.Gene.Gene_ResultsPanel.Gene_RVDocSum	SGEF	SGEF	318	2.7	3.1	-0.3	0.1	1e-05	0.54	0.1	-0.1	-0.4	-0.2	0.6	0.96	0.34	0.011
http://www.ensembl.org/Homo_sapiens/Variation/Summary?v=rs7626506	rs7626506	rs7626506	3	0.95	0.05	0	0	2.9e-05	0.13	-0.17	-0.06	A	T	0.1	http://www.ncbi.nlm.nih.gov/sites/entrez?Db=gene&Cmd=ShowDetailView&TermToSearch=344758&ordinalpos=1&itool=EntrezSystem2.PEntrez.Gene.Gene_ResultsPanel.Gene_RVDocSum	GPR149	GPR149	145	http://www.ncbi.nlm.nih.gov/sites/entrez?Db=gene&Cmd=ShowDetailView&TermToSearch=170506&ordinalpos=1&itool=EntrezSystem2.PEntrez.Gene.Gene_ResultsPanel.Gene_RVDocSum	DHX36	DHX36	250	http://www.ncbi.nlm.nih.gov/sites/entrez?Db=gene&Cmd=ShowDetailView&TermToSearch=26084&ordinalpos=1&itool=EntrezSystem2.PEntrez.Gene.Gene_ResultsPanel.Gene_RVDocSum	SGEF	SGEF	318	2.8	3.1	-0.2	0.1	1e-05	0.52	0.11	-0.1	-0.4	-0.2	0.6	0.96	0.35	0.01
http://www.ensembl.org/Homo_sapiens/Variation/Summary?v=rs6770742	rs6770742	rs6770742	3	0.95	0.04	0	0	3.5e-05	0.14	-0.17	-0.06	A	G	0.1	http://www.ncbi.nlm.nih.gov/sites/entrez?Db=gene&Cmd=ShowDetailView&TermToSearch=344758&ordinalpos=1&itool=EntrezSystem2.PEntrez.Gene.Gene_ResultsPanel.Gene_RVDocSum	GPR149	GPR149	145	http://www.ncbi.nlm.nih.gov/sites/entrez?Db=gene&Cmd=ShowDetailView&TermToSearch=170506&ordinalpos=1&itool=EntrezSystem2.PEntrez.Gene.Gene_ResultsPanel.Gene_RVDocSum	DHX36	DHX36	250	http://www.ncbi.nlm.nih.gov/sites/entrez?Db=gene&Cmd=ShowDetailView&TermToSearch=26084&ordinalpos=1&itool=EntrezSystem2.PEntrez.Gene.Gene_ResultsPanel.Gene_RVDocSum	SGEF	SGEF	318	2.7	3.1	-0.2	0.1	1e-05	0.48	0.13	-0.1	-0.4	-0.2	0.6	0.95	0.39	0.011
http://www.ensembl.org/Homo_sapiens/Variation/Summary?v=rs11928416	rs11928416	rs11928416	3	0.93	0.06	0	0	2.2e-05	0.16	-0.17	-0.06	C	T	0.09	http://www.ncbi.nlm.nih.gov/sites/entrez?Db=gene&Cmd=ShowDetailView&TermToSearch=344758&ordinalpos=1&itool=EntrezSystem2.PEntrez.Gene.Gene_ResultsPanel.Gene_RVDocSum	GPR149	GPR149	154	http://www.ncbi.nlm.nih.gov/sites/entrez?Db=gene&Cmd=ShowDetailView&TermToSearch=170506&ordinalpos=1&itool=EntrezSystem2.PEntrez.Gene.Gene_ResultsPanel.Gene_RVDocSum	DHX36	DHX36	259	http://www.ncbi.nlm.nih.gov/sites/entrez?Db=gene&Cmd=ShowDetailView&TermToSearch=26084&ordinalpos=1&itool=EntrezSystem2.PEntrez.Gene.Gene_ResultsPanel.Gene_RVDocSum	SGEF	SGEF	327	2.9	3.1	-0.2	0	1e-05	0.39	0.14	-0.2	-0.4	-0.2	0.6	0.94	0.44	0.011
http://www.ensembl.org/Homo_sapiens/Variation/Summary?v=rs6777121	rs6777121	rs6777121	3	0.93	0.06	0	0	2.2e-05	0.16	-0.17	-0.06	G	C	0.09	http://www.ncbi.nlm.nih.gov/sites/entrez?Db=gene&Cmd=ShowDetailView&TermToSearch=344758&ordinalpos=1&itool=EntrezSystem2.PEntrez.Gene.Gene_ResultsPanel.Gene_RVDocSum	GPR149	GPR149	158	http://www.ncbi.nlm.nih.gov/sites/entrez?Db=gene&Cmd=ShowDetailView&TermToSearch=170506&ordinalpos=1&itool=EntrezSystem2.PEntrez.Gene.Gene_ResultsPanel.Gene_RVDocSum	DHX36	DHX36	263	http://www.ncbi.nlm.nih.gov/sites/entrez?Db=gene&Cmd=ShowDetailView&TermToSearch=26084&ordinalpos=1&itool=EntrezSystem2.PEntrez.Gene.Gene_ResultsPanel.Gene_RVDocSum	SGEF	SGEF	331	2.9	3.1	-0.2	0	1e-05	0.39	0.14	-0.2	-0.4	-0.2	0.6	0.94	0.45	0.01
http://www.ensembl.org/Homo_sapiens/Variation/Summary?v=rs17372655	rs17372655	rs17372655	3	0.93	0.07	0	0	2.1e-05	0.16	-0.17	-0.06	C	T	0.09	http://www.ncbi.nlm.nih.gov/sites/entrez?Db=gene&Cmd=ShowDetailView&TermToSearch=344758&ordinalpos=1&itool=EntrezSystem2.PEntrez.Gene.Gene_ResultsPanel.Gene_RVDocSum	GPR149	GPR149	162	http://www.ncbi.nlm.nih.gov/sites/entrez?Db=gene&Cmd=ShowDetailView&TermToSearch=170506&ordinalpos=1&itool=EntrezSystem2.PEntrez.Gene.Gene_ResultsPanel.Gene_RVDocSum	DHX36	DHX36	268	http://www.ncbi.nlm.nih.gov/sites/entrez?Db=gene&Cmd=ShowDetailView&TermToSearch=26084&ordinalpos=1&itool=EntrezSystem2.PEntrez.Gene.Gene_ResultsPanel.Gene_RVDocSum	SGEF	SGEF	336	2.9	3	-0.2	0	1.1e-05	0.36	0.15	-0.2	-0.4	-0.2	0.6	0.96	0.46	0.011
http://www.ensembl.org/Homo_sapiens/Variation/Summary?v=rs7620094	rs7620094	rs7620094	3	0.93	0.06	0	0	2.2e-05	0.17	-0.17	-0.06	C	T	0.09	http://www.ncbi.nlm.nih.gov/sites/entrez?Db=gene&Cmd=ShowDetailView&TermToSearch=344758&ordinalpos=1&itool=EntrezSystem2.PEntrez.Gene.Gene_ResultsPanel.Gene_RVDocSum	GPR149	GPR149	178	http://www.ncbi.nlm.nih.gov/sites/entrez?Db=gene&Cmd=ShowDetailView&TermToSearch=170506&ordinalpos=1&itool=EntrezSystem2.PEntrez.Gene.Gene_ResultsPanel.Gene_RVDocSum	DHX36	DHX36	283	http://www.ncbi.nlm.nih.gov/sites/entrez?Db=gene&Cmd=ShowDetailView&TermToSearch=26084&ordinalpos=1&itool=EntrezSystem2.PEntrez.Gene.Gene_ResultsPanel.Gene_RVDocSum	SGEF	SGEF	351	2.9	3.1	-0.2	0	9.4e-06	0.37	0.16	-0.2	-0.4	-0.2	0.6	0.94	0.49	0.01
http://www.ensembl.org/Homo_sapiens/Variation/Summary?v=rs4132402	rs4132402	rs4132402	3	0.91	0.09	0	0.01	1.4e-05	0.19	-0.19	-0.06	G	A	0.08	http://www.ncbi.nlm.nih.gov/sites/entrez?Db=gene&Cmd=ShowDetailView&TermToSearch=344758&ordinalpos=1&itool=EntrezSystem2.PEntrez.Gene.Gene_ResultsPanel.Gene_RVDocSum	GPR149	GPR149	190	http://www.ncbi.nlm.nih.gov/sites/entrez?Db=gene&Cmd=ShowDetailView&TermToSearch=170506&ordinalpos=1&itool=EntrezSystem2.PEntrez.Gene.Gene_ResultsPanel.Gene_RVDocSum	DHX36	DHX36	295	http://www.ncbi.nlm.nih.gov/sites/entrez?Db=gene&Cmd=ShowDetailView&TermToSearch=26084&ordinalpos=1&itool=EntrezSystem2.PEntrez.Gene.Gene_ResultsPanel.Gene_RVDocSum	SGEF	SGEF	363	3	3.1	-0.2	0	8.7e-06	0.32	0.14	-0.2	-0.3	-0.2	0.5	0.94	0.53	0.013
http://www.ensembl.org/Homo_sapiens/Variation/Summary?v=rs11915900	rs11915900	rs11915900	3	0.94	0.05	0	0	2.7e-05	0.18	-0.17	-0.06	A	G	0.09	http://www.ncbi.nlm.nih.gov/sites/entrez?Db=gene&Cmd=ShowDetailView&TermToSearch=344758&ordinalpos=1&itool=EntrezSystem2.PEntrez.Gene.Gene_ResultsPanel.Gene_RVDocSum	GPR149	GPR149	206	http://www.ncbi.nlm.nih.gov/sites/entrez?Db=gene&Cmd=ShowDetailView&TermToSearch=170506&ordinalpos=1&itool=EntrezSystem2.PEntrez.Gene.Gene_ResultsPanel.Gene_RVDocSum	DHX36	DHX36	311	http://www.ncbi.nlm.nih.gov/sites/entrez?Db=gene&Cmd=ShowDetailView&TermToSearch=26084&ordinalpos=1&itool=EntrezSystem2.PEntrez.Gene.Gene_ResultsPanel.Gene_RVDocSum	SGEF	SGEF	379	2.8	3	-0.2	0	1e-05	0.37	0.15	-0.2	-0.4	-0.2	0.6	0.89	0.49	0.011
http://www.ensembl.org/Homo_sapiens/Variation/Summary?v=rs7652824	rs7652824	rs7652824	3	0.96	0.04	0	0	3.6e-05	0.18	-0.19	-0.06	T	G	0.08	http://www.ncbi.nlm.nih.gov/sites/entrez?Db=gene&Cmd=ShowDetailView&TermToSearch=344758&ordinalpos=1&itool=EntrezSystem2.PEntrez.Gene.Gene_ResultsPanel.Gene_RVDocSum	GPR149	GPR149	207	http://www.ncbi.nlm.nih.gov/sites/entrez?Db=gene&Cmd=ShowDetailView&TermToSearch=170506&ordinalpos=1&itool=EntrezSystem2.PEntrez.Gene.Gene_ResultsPanel.Gene_RVDocSum	DHX36	DHX36	313	http://www.ncbi.nlm.nih.gov/sites/entrez?Db=gene&Cmd=ShowDetailView&TermToSearch=26084&ordinalpos=1&itool=EntrezSystem2.PEntrez.Gene.Gene_ResultsPanel.Gene_RVDocSum	SGEF	SGEF	381	2.7	3	-0.2	0	1.2e-05	0.39	0.16	-0.2	-0.3	-0.2	0.6	0.87	0.49	0.012
http://www.ensembl.org/Homo_sapiens/Variation/Summary?v=rs7610698	rs7610698	rs7610698	3	0.95	0.05	0	0	3e-05	0.18	-0.17	-0.06	A	C	0.09	http://www.ncbi.nlm.nih.gov/sites/entrez?Db=gene&Cmd=ShowDetailView&TermToSearch=344758&ordinalpos=1&itool=EntrezSystem2.PEntrez.Gene.Gene_ResultsPanel.Gene_RVDocSum	GPR149	GPR149	214	http://www.ncbi.nlm.nih.gov/sites/entrez?Db=gene&Cmd=ShowDetailView&TermToSearch=170506&ordinalpos=1&itool=EntrezSystem2.PEntrez.Gene.Gene_ResultsPanel.Gene_RVDocSum	DHX36	DHX36	319	http://www.ncbi.nlm.nih.gov/sites/entrez?Db=gene&Cmd=ShowDetailView&TermToSearch=26084&ordinalpos=1&itool=EntrezSystem2.PEntrez.Gene.Gene_ResultsPanel.Gene_RVDocSum	SGEF	SGEF	387	2.8	3	-0.2	0	1e-05	0.37	0.15	-0.2	-0.3	-0.2	0.6	0.88	0.49	0.011
http://www.ensembl.org/Homo_sapiens/Variation/Summary?v=rs7610714	rs7610714	rs7610714	3	0.94	0.06	0	0	2.5e-05	0.16	-0.19	-0.06	T	C	0.09	http://www.ncbi.nlm.nih.gov/sites/entrez?Db=gene&Cmd=ShowDetailView&TermToSearch=344758&ordinalpos=1&itool=EntrezSystem2.PEntrez.Gene.Gene_ResultsPanel.Gene_RVDocSum	GPR149	GPR149	214	http://www.ncbi.nlm.nih.gov/sites/entrez?Db=gene&Cmd=ShowDetailView&TermToSearch=170506&ordinalpos=1&itool=EntrezSystem2.PEntrez.Gene.Gene_ResultsPanel.Gene_RVDocSum	DHX36	DHX36	319	http://www.ncbi.nlm.nih.gov/sites/entrez?Db=gene&Cmd=ShowDetailView&TermToSearch=26084&ordinalpos=1&itool=EntrezSystem2.PEntrez.Gene.Gene_ResultsPanel.Gene_RVDocSum	SGEF	SGEF	387	2.8	3.1	-0.2	0	7.6e-06	0.33	0.15	-0.1	-0.3	-0.2	0.6	0.85	0.45	0.011
http://www.ensembl.org/Homo_sapiens/Variation/Summary?v=rs6771207	rs6771207	rs6771207	3	0.92	0.07	0	0	2e-05	0.66	-0.14	-0.01	G	A	0.15	http://www.ncbi.nlm.nih.gov/sites/entrez?Db=gene&Cmd=ShowDetailView&TermToSearch=23101&ordinalpos=1&itool=EntrezSystem2.PEntrez.Gene.Gene_ResultsPanel.Gene_RVDocSum	MCF2L2	MCF2L2	0	http://www.ncbi.nlm.nih.gov/sites/entrez?Db=gene&Cmd=ShowDetailView&TermToSearch=26842&ordinalpos=1&itool=EntrezSystem2.PEntrez.Gene.Gene_ResultsPanel.Gene_RVDocSum	RNU3P4	RNU3P4	4	http://www.ncbi.nlm.nih.gov/sites/entrez?Db=gene&Cmd=ShowDetailView&TermToSearch=27074&ordinalpos=1&itool=EntrezSystem2.PEntrez.Gene.Gene_ResultsPanel.Gene_RVDocSum	LAMP3	LAMP3	16	2.9	1.2	0.5	0.2	0.0024	0.02	0.057	-0.5	-0.3	-0.3	-0.3	0.27	0.64	0.8
http://www.ensembl.org/Homo_sapiens/Variation/Summary?v=rs11708313	rs11708313	rs11708313	3	0.94	0.06	0	0	2.9e-05	0.89	-0.14	0	A	G	0.15	http://www.ncbi.nlm.nih.gov/sites/entrez?Db=gene&Cmd=ShowDetailView&TermToSearch=23101&ordinalpos=1&itool=EntrezSystem2.PEntrez.Gene.Gene_ResultsPanel.Gene_RVDocSum	MCF2L2	MCF2L2	0	http://www.ncbi.nlm.nih.gov/sites/entrez?Db=gene&Cmd=ShowDetailView&TermToSearch=26842&ordinalpos=1&itool=EntrezSystem2.PEntrez.Gene.Gene_ResultsPanel.Gene_RVDocSum	RNU3P4	RNU3P4	10	http://www.ncbi.nlm.nih.gov/sites/entrez?Db=gene&Cmd=ShowDetailView&TermToSearch=27074&ordinalpos=1&itool=EntrezSystem2.PEntrez.Gene.Gene_ResultsPanel.Gene_RVDocSum	LAMP3	LAMP3	22	2.8	1.1	0.4	0.3	0.003	0.026	0.049	-0.6	-0.4	-0.2	-0.3	0.45	0.53	0.83
http://www.ensembl.org/Homo_sapiens/Variation/Summary?v=rs11707756	rs11707756	rs11707756	3	0.96	0.04	0	0	4.4e-05	0.86	-0.15	-0.01	A	T	0.14	http://www.ncbi.nlm.nih.gov/sites/entrez?Db=gene&Cmd=ShowDetailView&TermToSearch=23101&ordinalpos=1&itool=EntrezSystem2.PEntrez.Gene.Gene_ResultsPanel.Gene_RVDocSum	MCF2L2	MCF2L2	0	http://www.ncbi.nlm.nih.gov/sites/entrez?Db=gene&Cmd=ShowDetailView&TermToSearch=26842&ordinalpos=1&itool=EntrezSystem2.PEntrez.Gene.Gene_ResultsPanel.Gene_RVDocSum	RNU3P4	RNU3P4	16	http://www.ncbi.nlm.nih.gov/sites/entrez?Db=gene&Cmd=ShowDetailView&TermToSearch=27074&ordinalpos=1&itool=EntrezSystem2.PEntrez.Gene.Gene_ResultsPanel.Gene_RVDocSum	LAMP3	LAMP3	29	2.7	1.1	0.3	0.3	0.0035	0.035	0.048	-0.5	-0.3	-0.2	-0.2	0.4	0.45	0.91
http://www.ensembl.org/Homo_sapiens/Variation/Summary?v=rs16866357	rs16866357	rs16866357	3	0.98	0	0	0.01	0.0083	7.5e-05	0.08	-0.11	A	G	0.28	http://www.ncbi.nlm.nih.gov/sites/entrez?Db=gene&Cmd=ShowDetailView&TermToSearch=344901&ordinalpos=1&itool=EntrezSystem2.PEntrez.Gene.Gene_ResultsPanel.Gene_RVDocSum	OSTN	OSTN	0	http://www.ncbi.nlm.nih.gov/sites/entrez?Db=gene&Cmd=ShowDetailView&TermToSearch=257313&ordinalpos=1&itool=EntrezSystem2.PEntrez.Gene.Gene_ResultsPanel.Gene_RVDocSum	UTS2D	UTS2D	24	http://www.ncbi.nlm.nih.gov/sites/entrez?Db=gene&Cmd=ShowDetailView&TermToSearch=152137&ordinalpos=1&itool=EntrezSystem2.PEntrez.Gene.Gene_ResultsPanel.Gene_RVDocSum	CCDC50	CCDC50	85	0.8	-0.2	0.5	-0.2	0.16	0.017	0.53	2.4	0	1.8	0	0.079	0.00034	0.12
http://www.ensembl.org/Homo_sapiens/Variation/Summary?v=rs16866360	rs16866360	rs16866360	3	0.99	0	0	0.01	0.01	7.1e-05	0.08	-0.12	C	T	0.27	http://www.ncbi.nlm.nih.gov/sites/entrez?Db=gene&Cmd=ShowDetailView&TermToSearch=344901&ordinalpos=1&itool=EntrezSystem2.PEntrez.Gene.Gene_ResultsPanel.Gene_RVDocSum	OSTN	OSTN	0	http://www.ncbi.nlm.nih.gov/sites/entrez?Db=gene&Cmd=ShowDetailView&TermToSearch=257313&ordinalpos=1&itool=EntrezSystem2.PEntrez.Gene.Gene_ResultsPanel.Gene_RVDocSum	UTS2D	UTS2D	24	http://www.ncbi.nlm.nih.gov/sites/entrez?Db=gene&Cmd=ShowDetailView&TermToSearch=152137&ordinalpos=1&itool=EntrezSystem2.PEntrez.Gene.Gene_ResultsPanel.Gene_RVDocSum	CCDC50	CCDC50	85	0.8	-0.2	0.5	-0.2	0.17	0.024	0.51	2.4	0.1	1.9	-0.1	0.062	0.00025	0.21
http://www.ensembl.org/Homo_sapiens/Variation/Summary?v=rs2071665	rs2071665	rs2071665	4	0.99	0.01	0	0	0.00014	0.82	0.11	-0.01	C	G	0.39	http://www.ncbi.nlm.nih.gov/sites/entrez?Db=gene&Cmd=ShowDetailView&TermToSearch=57732&ordinalpos=1&itool=EntrezSystem2.PEntrez.Gene.Gene_ResultsPanel.Gene_RVDocSum	ZFYVE28	ZFYVE28	0	http://www.ncbi.nlm.nih.gov/sites/entrez?Db=gene&Cmd=ShowDetailView&TermToSearch=10608&ordinalpos=1&itool=EntrezSystem2.PEntrez.Gene.Gene_ResultsPanel.Gene_RVDocSum	MXD4	MXD4	40	http://www.ncbi.nlm.nih.gov/sites/entrez?Db=gene&Cmd=ShowDetailView&TermToSearch=79441&ordinalpos=1&itool=EntrezSystem2.PEntrez.Gene.Gene_ResultsPanel.Gene_RVDocSum	C4orf15	C4orf15	60	2.2	-0.4	2.2	0.2	0.56	0.00011	0.049	-0.5	-0.4	-0.3	-0.2	0.87	0.29	0.38
http://www.ensembl.org/Homo_sapiens/Variation/Summary?v=rs4698247	rs4698247	rs4698247	4	0.98	0.02	0	0	0.00011	0.47	-0.14	0.03	C	T	0.21	http://www.ncbi.nlm.nih.gov/sites/entrez?Db=gene&Cmd=ShowDetailView&TermToSearch=259282&ordinalpos=1&itool=EntrezSystem2.PEntrez.Gene.Gene_ResultsPanel.Gene_RVDocSum	FAM44A	FAM44A	9	http://www.ncbi.nlm.nih.gov/sites/entrez?Db=gene&Cmd=ShowDetailView&TermToSearch=579&ordinalpos=1&itool=EntrezSystem2.PEntrez.Gene.Gene_ResultsPanel.Gene_RVDocSum	BAPX1	BAPX1	16	http://www.ncbi.nlm.nih.gov/sites/entrez?Db=gene&Cmd=ShowDetailView&TermToSearch=644868&ordinalpos=1&itool=EntrezSystem2.PEntrez.Gene.Gene_ResultsPanel.Gene_RVDocSum	LOC644868	LOC644868	72	2.3	-0.2	1.6	0.6	0.84	0.00067	0.013	-0.3	-0.2	-0.2	-0.3	0.57	0.37	0.67
http://www.ensembl.org/Homo_sapiens/Variation/Summary?v=rs1154578	rs1154578	rs1154578	4	0.99	0.01	0	0	0.0002	0.22	-0.09	-0.03	C	T	0.34	http://www.ncbi.nlm.nih.gov/sites/entrez?Db=gene&Cmd=ShowDetailView&TermToSearch=57545&ordinalpos=1&itool=EntrezSystem2.PEntrez.Gene.Gene_ResultsPanel.Gene_RVDocSum	KIAA1345	KIAA1345	0	http://www.ncbi.nlm.nih.gov/sites/entrez?Db=gene&Cmd=ShowDetailView&TermToSearch=114905&ordinalpos=1&itool=EntrezSystem2.PEntrez.Gene.Gene_ResultsPanel.Gene_RVDocSum	C1QTNF7	C1QTNF7	60	http://www.ncbi.nlm.nih.gov/sites/entrez?Db=gene&Cmd=ShowDetailView&TermToSearch=26234&ordinalpos=1&itool=EntrezSystem2.PEntrez.Gene.Gene_ResultsPanel.Gene_RVDocSum	FBXL5	FBXL5	99	2.1	-0.4	2.3	0.3	0.3	0.0002	0.043	-0.3	-0.4	-0.1	-0.3	0.79	0.16	0.62
http://www.ensembl.org/Homo_sapiens/Variation/Summary?v=rs6448423	rs6448423	rs6448423	4	0.99	0.01	0	0	0.00016	0.44	-0.1	0.02	T	A	0.27	http://www.ncbi.nlm.nih.gov/sites/entrez?Db=gene&Cmd=ShowDetailView&TermToSearch=389203&ordinalpos=1&itool=EntrezSystem2.PEntrez.Gene.Gene_ResultsPanel.Gene_RVDocSum	LOC389203	LOC389203	56	http://www.ncbi.nlm.nih.gov/sites/entrez?Db=gene&Cmd=ShowDetailView&TermToSearch=23231&ordinalpos=1&itool=EntrezSystem2.PEntrez.Gene.Gene_ResultsPanel.Gene_RVDocSum	KIAA0746	KIAA0746	123	http://www.ncbi.nlm.nih.gov/sites/entrez?Db=gene&Cmd=ShowDetailView&TermToSearch=645481&ordinalpos=1&itool=EntrezSystem2.PEntrez.Gene.Gene_ResultsPanel.Gene_RVDocSum	LOC645481	LOC645481	126	2.1	1.3	0.3	-0.2	0.0015	0.046	0.48	-0.6	-0.5	0.7	-0.1	0.69	0.009	0.29
http://www.ensembl.org/Homo_sapiens/Variation/Summary?v=rs6841503	rs6841503	rs6841503	4	0.99	0.01	0	0	0.00026	0.18	-0.09	0.03	A	G	0.3	http://www.ncbi.nlm.nih.gov/sites/entrez?Db=gene&Cmd=ShowDetailView&TermToSearch=389203&ordinalpos=1&itool=EntrezSystem2.PEntrez.Gene.Gene_ResultsPanel.Gene_RVDocSum	LOC389203	LOC389203	56	http://www.ncbi.nlm.nih.gov/sites/entrez?Db=gene&Cmd=ShowDetailView&TermToSearch=23231&ordinalpos=1&itool=EntrezSystem2.PEntrez.Gene.Gene_ResultsPanel.Gene_RVDocSum	KIAA0746	KIAA0746	124	http://www.ncbi.nlm.nih.gov/sites/entrez?Db=gene&Cmd=ShowDetailView&TermToSearch=645481&ordinalpos=1&itool=EntrezSystem2.PEntrez.Gene.Gene_ResultsPanel.Gene_RVDocSum	LOC645481	LOC645481	125	2.1	0.7	0.7	-0.2	0.0091	0.014	0.37	-0.4	-0.6	0.8	-0.2	0.99	0.0078	0.54
http://www.ensembl.org/Homo_sapiens/Variation/Summary?v=rs4234990	rs4234990	rs4234990	4	0.98	0.02	0	0	9.7e-05	0.4	-0.14	0.03	T	C	0.13	http://www.ncbi.nlm.nih.gov/sites/entrez?Db=gene&Cmd=ShowDetailView&TermToSearch=389203&ordinalpos=1&itool=EntrezSystem2.PEntrez.Gene.Gene_ResultsPanel.Gene_RVDocSum	LOC389203	LOC389203	57	http://www.ncbi.nlm.nih.gov/sites/entrez?Db=gene&Cmd=ShowDetailView&TermToSearch=23231&ordinalpos=1&itool=EntrezSystem2.PEntrez.Gene.Gene_ResultsPanel.Gene_RVDocSum	KIAA0746	KIAA0746	124	http://www.ncbi.nlm.nih.gov/sites/entrez?Db=gene&Cmd=ShowDetailView&TermToSearch=645481&ordinalpos=1&itool=EntrezSystem2.PEntrez.Gene.Gene_ResultsPanel.Gene_RVDocSum	LOC645481	LOC645481	125	2.3	2.4	-0.2	-0.1	7.3e-05	0.24	0.28	-0.4	-0.4	0.5	0.1	0.9	0.022	0.089
http://www.ensembl.org/Homo_sapiens/Variation/Summary?v=rs4420968	rs4420968	rs4420968	4	0.99	0.01	0	0	0.00018	0.39	-0.13	0.03	G	T	0.13	http://www.ncbi.nlm.nih.gov/sites/entrez?Db=gene&Cmd=ShowDetailView&TermToSearch=389203&ordinalpos=1&itool=EntrezSystem2.PEntrez.Gene.Gene_ResultsPanel.Gene_RVDocSum	LOC389203	LOC389203	61	http://www.ncbi.nlm.nih.gov/sites/entrez?Db=gene&Cmd=ShowDetailView&TermToSearch=645481&ordinalpos=1&itool=EntrezSystem2.PEntrez.Gene.Gene_ResultsPanel.Gene_RVDocSum	LOC645481	LOC645481	121	http://www.ncbi.nlm.nih.gov/sites/entrez?Db=gene&Cmd=ShowDetailView&TermToSearch=23231&ordinalpos=1&itool=EntrezSystem2.PEntrez.Gene.Gene_ResultsPanel.Gene_RVDocSum	KIAA0746	KIAA0746	128	2.1	2.1	-0.2	-0.1	0.00017	0.26	0.27	-0.4	-0.4	0.3	0	0.84	0.043	0.2
http://www.ensembl.org/Homo_sapiens/Variation/Summary?v=rs4568226	rs4568226	rs4568226	4	0.99	0.01	0	0	0.00019	0.38	-0.13	0.03	C	T	0.13	http://www.ncbi.nlm.nih.gov/sites/entrez?Db=gene&Cmd=ShowDetailView&TermToSearch=389203&ordinalpos=1&itool=EntrezSystem2.PEntrez.Gene.Gene_ResultsPanel.Gene_RVDocSum	LOC389203	LOC389203	61	http://www.ncbi.nlm.nih.gov/sites/entrez?Db=gene&Cmd=ShowDetailView&TermToSearch=645481&ordinalpos=1&itool=EntrezSystem2.PEntrez.Gene.Gene_ResultsPanel.Gene_RVDocSum	LOC645481	LOC645481	121	http://www.ncbi.nlm.nih.gov/sites/entrez?Db=gene&Cmd=ShowDetailView&TermToSearch=23231&ordinalpos=1&itool=EntrezSystem2.PEntrez.Gene.Gene_ResultsPanel.Gene_RVDocSum	KIAA0746	KIAA0746	128	2.1	2.1	-0.2	-0.1	0.00017	0.27	0.29	-0.4	-0.4	0.3	0	0.83	0.045	0.21
http://www.ensembl.org/Homo_sapiens/Variation/Summary?v=rs7669901	rs7669901	rs7669901	4	0.99	0.01	0	0	0.00044	0.64	0.08	-0.01	T	C	0.37	http://www.ncbi.nlm.nih.gov/sites/entrez?Db=gene&Cmd=ShowDetailView&TermToSearch=645716&ordinalpos=1&itool=EntrezSystem2.PEntrez.Gene.Gene_ResultsPanel.Gene_RVDocSum	LOC645716	LOC645716	555	http://www.ncbi.nlm.nih.gov/sites/entrez?Db=gene&Cmd=ShowDetailView&TermToSearch=5099&ordinalpos=1&itool=EntrezSystem2.PEntrez.Gene.Gene_ResultsPanel.Gene_RVDocSum	PCDH7	PCDH7	624	http://www.ncbi.nlm.nih.gov/sites/entrez?Db=gene&Cmd=ShowDetailView&TermToSearch=NA&ordinalpos=1&itool=EntrezSystem2.PEntrez.Gene.Gene_ResultsPanel.Gene_RVDocSum	NA	NA	NA	2.1	0.6	2	-0.2	0.11	0.00028	0.48	-0.7	-0.4	-0.5	-0.3	0.64	0.86	0.93
http://www.ensembl.org/Homo_sapiens/Variation/Summary?v=rs7682604	rs7682604	rs7682604	4	0.99	0.01	0	0	0.0002	0.078	0.11	-0.05	C	G	0.22	http://www.ncbi.nlm.nih.gov/sites/entrez?Db=gene&Cmd=ShowDetailView&TermToSearch=644484&ordinalpos=1&itool=EntrezSystem2.PEntrez.Gene.Gene_ResultsPanel.Gene_RVDocSum	FLJ43706	FLJ43706	528	http://www.ncbi.nlm.nih.gov/sites/entrez?Db=gene&Cmd=ShowDetailView&TermToSearch=23284&ordinalpos=1&itool=EntrezSystem2.PEntrez.Gene.Gene_ResultsPanel.Gene_RVDocSum	LPHN3	LPHN3	605	http://www.ncbi.nlm.nih.gov/sites/entrez?Db=gene&Cmd=ShowDetailView&TermToSearch=644419&ordinalpos=1&itool=EntrezSystem2.PEntrez.Gene.Gene_ResultsPanel.Gene_RVDocSum	LOC644419	LOC644419	853	2.1	-0.1	-0.1	3.4	0.11	0.19	3.3e-06	-0.1	0.2	-0.4	-0.3	0.045	0.63	0.88
http://www.ensembl.org/Homo_sapiens/Variation/Summary?v=rs6534849	rs6534849	rs6534849	4	0.97	0.03	0	0	7.2e-05	0.91	-0.17	0	C	T	0.33	http://www.ncbi.nlm.nih.gov/sites/entrez?Db=gene&Cmd=ShowDetailView&TermToSearch=643100&ordinalpos=1&itool=EntrezSystem2.PEntrez.Gene.Gene_ResultsPanel.Gene_RVDocSum	LOC643100	LOC643100	28	http://www.ncbi.nlm.nih.gov/sites/entrez?Db=gene&Cmd=ShowDetailView&TermToSearch=25849&ordinalpos=1&itool=EntrezSystem2.PEntrez.Gene.Gene_ResultsPanel.Gene_RVDocSum	DKFZP564O0823	DKFZP564O0823	100	http://www.ncbi.nlm.nih.gov/sites/entrez?Db=gene&Cmd=ShowDetailView&TermToSearch=25898&ordinalpos=1&itool=EntrezSystem2.PEntrez.Gene.Gene_ResultsPanel.Gene_RVDocSum	RCHY1	RCHY1	329	2.5	1.4	0.5	-0.1	0.0011	0.019	0.24	-0.5	-0.3	-0.3	-0.2	0.79	0.91	0.69
http://www.ensembl.org/Homo_sapiens/Variation/Summary?v=rs6826597	rs6826597	rs6826597	4	0.99	0.01	0	0	0.0002	0.78	0.14	0.01	T	A	0.15	http://www.ncbi.nlm.nih.gov/sites/entrez?Db=gene&Cmd=ShowDetailView&TermToSearch=344978&ordinalpos=1&itool=EntrezSystem2.PEntrez.Gene.Gene_ResultsPanel.Gene_RVDocSum	LOC344978	LOC344978	125	http://www.ncbi.nlm.nih.gov/sites/entrez?Db=gene&Cmd=ShowDetailView&TermToSearch=133022&ordinalpos=1&itool=EntrezSystem2.PEntrez.Gene.Gene_ResultsPanel.Gene_RVDocSum	TRAM1L1	TRAM1L1	359	http://www.ncbi.nlm.nih.gov/sites/entrez?Db=gene&Cmd=ShowDetailView&TermToSearch=645368&ordinalpos=1&itool=EntrezSystem2.PEntrez.Gene.Gene_ResultsPanel.Gene_RVDocSum	LOC645368	LOC645368	681	2.1	1.9	-0.1	-0.2	0.00034	0.2	0.59	-0.5	-0.4	-0.3	-0.2	0.78	0.79	0.8
http://www.ensembl.org/Homo_sapiens/Variation/Summary?v=rs12640779	rs12640779	rs12640779	4	0.99	0.01	0	0	0.00015	0.82	0.14	0.01	T	C	0.15	http://www.ncbi.nlm.nih.gov/sites/entrez?Db=gene&Cmd=ShowDetailView&TermToSearch=344978&ordinalpos=1&itool=EntrezSystem2.PEntrez.Gene.Gene_ResultsPanel.Gene_RVDocSum	LOC344978	LOC344978	129	http://www.ncbi.nlm.nih.gov/sites/entrez?Db=gene&Cmd=ShowDetailView&TermToSearch=133022&ordinalpos=1&itool=EntrezSystem2.PEntrez.Gene.Gene_ResultsPanel.Gene_RVDocSum	TRAM1L1	TRAM1L1	355	http://www.ncbi.nlm.nih.gov/sites/entrez?Db=gene&Cmd=ShowDetailView&TermToSearch=645368&ordinalpos=1&itool=EntrezSystem2.PEntrez.Gene.Gene_ResultsPanel.Gene_RVDocSum	LOC645368	LOC645368	684	2.2	2	-0.1	-0.2	0.00025	0.2	0.59	-0.5	-0.4	-0.3	-0.2	0.83	0.79	0.8
http://www.ensembl.org/Homo_sapiens/Variation/Summary?v=rs10022478	rs10022478	rs10022478	4	0.99	0.01	0	0	0.00022	0.79	0.14	0.01	A	T	0.15	http://www.ncbi.nlm.nih.gov/sites/entrez?Db=gene&Cmd=ShowDetailView&TermToSearch=344978&ordinalpos=1&itool=EntrezSystem2.PEntrez.Gene.Gene_ResultsPanel.Gene_RVDocSum	LOC344978	LOC344978	133	http://www.ncbi.nlm.nih.gov/sites/entrez?Db=gene&Cmd=ShowDetailView&TermToSearch=133022&ordinalpos=1&itool=EntrezSystem2.PEntrez.Gene.Gene_ResultsPanel.Gene_RVDocSum	TRAM1L1	TRAM1L1	350	http://www.ncbi.nlm.nih.gov/sites/entrez?Db=gene&Cmd=ShowDetailView&TermToSearch=645368&ordinalpos=1&itool=EntrezSystem2.PEntrez.Gene.Gene_ResultsPanel.Gene_RVDocSum	LOC645368	LOC645368	689	2.1	1.9	-0.1	-0.1	0.00033	0.25	0.5	-0.5	-0.4	-0.3	-0.2	0.81	0.79	0.84
http://www.ensembl.org/Homo_sapiens/Variation/Summary?v=rs13148407	rs13148407	rs13148407	4	0.98	0.02	0	0	0.00012	0.86	0.12	-0.01	C	G	0.2	http://www.ncbi.nlm.nih.gov/sites/entrez?Db=gene&Cmd=ShowDetailView&TermToSearch=344978&ordinalpos=1&itool=EntrezSystem2.PEntrez.Gene.Gene_ResultsPanel.Gene_RVDocSum	LOC344978	LOC344978	184	http://www.ncbi.nlm.nih.gov/sites/entrez?Db=gene&Cmd=ShowDetailView&TermToSearch=133022&ordinalpos=1&itool=EntrezSystem2.PEntrez.Gene.Gene_ResultsPanel.Gene_RVDocSum	TRAM1L1	TRAM1L1	300	http://www.ncbi.nlm.nih.gov/sites/entrez?Db=gene&Cmd=ShowDetailView&TermToSearch=645368&ordinalpos=1&itool=EntrezSystem2.PEntrez.Gene.Gene_ResultsPanel.Gene_RVDocSum	LOC645368	LOC645368	740	2.2	2.2	-0.1	-0.2	0.00013	0.17	0.53	-0.6	-0.5	-0.4	-0.2	0.88	0.75	0.52
http://www.ensembl.org/Homo_sapiens/Variation/Summary?v=rs12649281	rs12649281	rs12649281	4	0.99	0.01	0	0	0.00012	0.92	0.11	0	T	G	0.2	http://www.ncbi.nlm.nih.gov/sites/entrez?Db=gene&Cmd=ShowDetailView&TermToSearch=344978&ordinalpos=1&itool=EntrezSystem2.PEntrez.Gene.Gene_ResultsPanel.Gene_RVDocSum	LOC344978	LOC344978	195	http://www.ncbi.nlm.nih.gov/sites/entrez?Db=gene&Cmd=ShowDetailView&TermToSearch=133022&ordinalpos=1&itool=EntrezSystem2.PEntrez.Gene.Gene_ResultsPanel.Gene_RVDocSum	TRAM1L1	TRAM1L1	289	http://www.ncbi.nlm.nih.gov/sites/entrez?Db=gene&Cmd=ShowDetailView&TermToSearch=645368&ordinalpos=1&itool=EntrezSystem2.PEntrez.Gene.Gene_ResultsPanel.Gene_RVDocSum	LOC645368	LOC645368	750	2.2	2.2	-0.1	-0.2	0.00014	0.16	0.59	-0.6	-0.5	-0.4	-0.2	0.92	0.62	0.42
http://www.ensembl.org/Homo_sapiens/Variation/Summary?v=rs6839574	rs6839574	rs6839574	4	0.99	0.01	0	0	0.00014	0.9	0.11	0	T	C	0.2	http://www.ncbi.nlm.nih.gov/sites/entrez?Db=gene&Cmd=ShowDetailView&TermToSearch=344978&ordinalpos=1&itool=EntrezSystem2.PEntrez.Gene.Gene_ResultsPanel.Gene_RVDocSum	LOC344978	LOC344978	198	http://www.ncbi.nlm.nih.gov/sites/entrez?Db=gene&Cmd=ShowDetailView&TermToSearch=133022&ordinalpos=1&itool=EntrezSystem2.PEntrez.Gene.Gene_ResultsPanel.Gene_RVDocSum	TRAM1L1	TRAM1L1	286	http://www.ncbi.nlm.nih.gov/sites/entrez?Db=gene&Cmd=ShowDetailView&TermToSearch=645368&ordinalpos=1&itool=EntrezSystem2.PEntrez.Gene.Gene_ResultsPanel.Gene_RVDocSum	LOC645368	LOC645368	753	2.2	2.2	-0.1	-0.2	0.00013	0.16	0.58	-0.6	-0.5	-0.4	-0.2	0.88	0.59	0.4
http://www.ensembl.org/Homo_sapiens/Variation/Summary?v=rs6534583	rs6534583	rs6534583	4	0.98	0.02	0	0	0.00014	0.33	-0.12	-0.03	G	T	0.19	http://www.ncbi.nlm.nih.gov/sites/entrez?Db=gene&Cmd=ShowDetailView&TermToSearch=132817&ordinalpos=1&itool=EntrezSystem2.PEntrez.Gene.Gene_ResultsPanel.Gene_RVDocSum	LOC132817	LOC132817	236	http://www.ncbi.nlm.nih.gov/sites/entrez?Db=gene&Cmd=ShowDetailView&TermToSearch=729424&ordinalpos=1&itool=EntrezSystem2.PEntrez.Gene.Gene_ResultsPanel.Gene_RVDocSum	LOC729424	LOC729424	821	http://www.ncbi.nlm.nih.gov/sites/entrez?Db=gene&Cmd=ShowDetailView&TermToSearch=27152&ordinalpos=1&itool=EntrezSystem2.PEntrez.Gene.Gene_ResultsPanel.Gene_RVDocSum	PDZD6	PDZD6	832	2.2	0.5	1.4	-0.2	0.031	0.0011	0.34	-0.4	0.2	-0.4	-0.2	0.056	0.72	0.67
http://www.ensembl.org/Homo_sapiens/Variation/Summary?v=rs1393991	rs1393991	rs1393991	4	0.98	0.02	0	0	9.5e-05	0.33	-0.12	-0.03	G	A	0.21	http://www.ncbi.nlm.nih.gov/sites/entrez?Db=gene&Cmd=ShowDetailView&TermToSearch=132817&ordinalpos=1&itool=EntrezSystem2.PEntrez.Gene.Gene_ResultsPanel.Gene_RVDocSum	LOC132817	LOC132817	241	http://www.ncbi.nlm.nih.gov/sites/entrez?Db=gene&Cmd=ShowDetailView&TermToSearch=729424&ordinalpos=1&itool=EntrezSystem2.PEntrez.Gene.Gene_ResultsPanel.Gene_RVDocSum	LOC729424	LOC729424	816	http://www.ncbi.nlm.nih.gov/sites/entrez?Db=gene&Cmd=ShowDetailView&TermToSearch=27152&ordinalpos=1&itool=EntrezSystem2.PEntrez.Gene.Gene_ResultsPanel.Gene_RVDocSum	PDZD6	PDZD6	827	2.4	0.5	1.5	-0.2	0.027	0.00073	0.35	-0.4	0.2	-0.4	-0.3	0.061	0.75	0.68
http://www.ensembl.org/Homo_sapiens/Variation/Summary?v=rs6848985	rs6848985	rs6848985	4	0.98	0.02	0	0	0.0001	0.34	-0.12	-0.03	G	A	0.2	http://www.ncbi.nlm.nih.gov/sites/entrez?Db=gene&Cmd=ShowDetailView&TermToSearch=132817&ordinalpos=1&itool=EntrezSystem2.PEntrez.Gene.Gene_ResultsPanel.Gene_RVDocSum	LOC132817	LOC132817	246	http://www.ncbi.nlm.nih.gov/sites/entrez?Db=gene&Cmd=ShowDetailView&TermToSearch=729424&ordinalpos=1&itool=EntrezSystem2.PEntrez.Gene.Gene_ResultsPanel.Gene_RVDocSum	LOC729424	LOC729424	811	http://www.ncbi.nlm.nih.gov/sites/entrez?Db=gene&Cmd=ShowDetailView&TermToSearch=27152&ordinalpos=1&itool=EntrezSystem2.PEntrez.Gene.Gene_ResultsPanel.Gene_RVDocSum	PDZD6	PDZD6	822	2.4	0.5	1.6	-0.2	0.031	0.00071	0.35	-0.4	0.2	-0.4	-0.3	0.067	0.77	0.69
http://www.ensembl.org/Homo_sapiens/Variation/Summary?v=rs11098896	rs11098896	rs11098896	4	0.98	0.02	0	0	9.2e-05	0.31	-0.12	-0.03	C	T	0.21	http://www.ncbi.nlm.nih.gov/sites/entrez?Db=gene&Cmd=ShowDetailView&TermToSearch=132817&ordinalpos=1&itool=EntrezSystem2.PEntrez.Gene.Gene_ResultsPanel.Gene_RVDocSum	LOC132817	LOC132817	253	http://www.ncbi.nlm.nih.gov/sites/entrez?Db=gene&Cmd=ShowDetailView&TermToSearch=729424&ordinalpos=1&itool=EntrezSystem2.PEntrez.Gene.Gene_ResultsPanel.Gene_RVDocSum	LOC729424	LOC729424	805	http://www.ncbi.nlm.nih.gov/sites/entrez?Db=gene&Cmd=ShowDetailView&TermToSearch=27152&ordinalpos=1&itool=EntrezSystem2.PEntrez.Gene.Gene_ResultsPanel.Gene_RVDocSum	PDZD6	PDZD6	816	2.4	0.5	1.6	-0.2	0.027	0.00068	0.35	-0.4	0.2	-0.4	-0.3	0.06	0.76	0.7
http://www.ensembl.org/Homo_sapiens/Variation/Summary?v=rs1393993	rs1393993	rs1393993	4	0.98	0.02	0	0	9e-05	0.31	-0.12	-0.03	G	C	0.21	http://www.ncbi.nlm.nih.gov/sites/entrez?Db=gene&Cmd=ShowDetailView&TermToSearch=132817&ordinalpos=1&itool=EntrezSystem2.PEntrez.Gene.Gene_ResultsPanel.Gene_RVDocSum	LOC132817	LOC132817	253	http://www.ncbi.nlm.nih.gov/sites/entrez?Db=gene&Cmd=ShowDetailView&TermToSearch=729424&ordinalpos=1&itool=EntrezSystem2.PEntrez.Gene.Gene_ResultsPanel.Gene_RVDocSum	LOC729424	LOC729424	804	http://www.ncbi.nlm.nih.gov/sites/entrez?Db=gene&Cmd=ShowDetailView&TermToSearch=27152&ordinalpos=1&itool=EntrezSystem2.PEntrez.Gene.Gene_ResultsPanel.Gene_RVDocSum	PDZD6	PDZD6	815	2.4	0.5	1.6	-0.2	0.027	0.00068	0.34	-0.4	0.2	-0.4	-0.3	0.06	0.76	0.7
http://www.ensembl.org/Homo_sapiens/Variation/Summary?v=rs986907	rs986907	rs986907	4	0.97	0.03	0	0	7.6e-05	0.29	-0.12	-0.03	T	A	0.21	http://www.ncbi.nlm.nih.gov/sites/entrez?Db=gene&Cmd=ShowDetailView&TermToSearch=132817&ordinalpos=1&itool=EntrezSystem2.PEntrez.Gene.Gene_ResultsPanel.Gene_RVDocSum	LOC132817	LOC132817	261	http://www.ncbi.nlm.nih.gov/sites/entrez?Db=gene&Cmd=ShowDetailView&TermToSearch=729424&ordinalpos=1&itool=EntrezSystem2.PEntrez.Gene.Gene_ResultsPanel.Gene_RVDocSum	LOC729424	LOC729424	796	http://www.ncbi.nlm.nih.gov/sites/entrez?Db=gene&Cmd=ShowDetailView&TermToSearch=27152&ordinalpos=1&itool=EntrezSystem2.PEntrez.Gene.Gene_ResultsPanel.Gene_RVDocSum	PDZD6	PDZD6	807	2.5	0.6	1.6	-0.2	0.023	0.00066	0.34	-0.4	0.2	-0.4	-0.3	0.059	0.76	0.72
http://www.ensembl.org/Homo_sapiens/Variation/Summary?v=rs6856064	rs6856064	rs6856064	4	0.97	0.03	0	0	7.7e-05	0.3	-0.12	-0.03	T	C	0.21	http://www.ncbi.nlm.nih.gov/sites/entrez?Db=gene&Cmd=ShowDetailView&TermToSearch=132817&ordinalpos=1&itool=EntrezSystem2.PEntrez.Gene.Gene_ResultsPanel.Gene_RVDocSum	LOC132817	LOC132817	261	http://www.ncbi.nlm.nih.gov/sites/entrez?Db=gene&Cmd=ShowDetailView&TermToSearch=729424&ordinalpos=1&itool=EntrezSystem2.PEntrez.Gene.Gene_ResultsPanel.Gene_RVDocSum	LOC729424	LOC729424	796	http://www.ncbi.nlm.nih.gov/sites/entrez?Db=gene&Cmd=ShowDetailView&TermToSearch=27152&ordinalpos=1&itool=EntrezSystem2.PEntrez.Gene.Gene_ResultsPanel.Gene_RVDocSum	PDZD6	PDZD6	807	2.5	0.6	1.6	-0.2	0.024	0.00066	0.34	-0.4	0.2	-0.4	-0.3	0.062	0.76	0.72
http://www.ensembl.org/Homo_sapiens/Variation/Summary?v=rs7681140	rs7681140	rs7681140	4	0.97	0.03	0	0	6.6e-05	0.31	-0.12	-0.03	C	T	0.2	http://www.ncbi.nlm.nih.gov/sites/entrez?Db=gene&Cmd=ShowDetailView&TermToSearch=132817&ordinalpos=1&itool=EntrezSystem2.PEntrez.Gene.Gene_ResultsPanel.Gene_RVDocSum	LOC132817	LOC132817	263	http://www.ncbi.nlm.nih.gov/sites/entrez?Db=gene&Cmd=ShowDetailView&TermToSearch=729424&ordinalpos=1&itool=EntrezSystem2.PEntrez.Gene.Gene_ResultsPanel.Gene_RVDocSum	LOC729424	LOC729424	794	http://www.ncbi.nlm.nih.gov/sites/entrez?Db=gene&Cmd=ShowDetailView&TermToSearch=27152&ordinalpos=1&itool=EntrezSystem2.PEntrez.Gene.Gene_ResultsPanel.Gene_RVDocSum	PDZD6	PDZD6	805	2.5	0.6	1.6	-0.2	0.021	0.00067	0.34	-0.4	0.1	-0.4	-0.3	0.068	0.76	0.72
http://www.ensembl.org/Homo_sapiens/Variation/Summary?v=rs7686181	rs7686181	rs7686181	4	0.97	0.03	0	0	7.8e-05	0.31	-0.12	-0.03	C	A	0.2	http://www.ncbi.nlm.nih.gov/sites/entrez?Db=gene&Cmd=ShowDetailView&TermToSearch=132817&ordinalpos=1&itool=EntrezSystem2.PEntrez.Gene.Gene_ResultsPanel.Gene_RVDocSum	LOC132817	LOC132817	263	http://www.ncbi.nlm.nih.gov/sites/entrez?Db=gene&Cmd=ShowDetailView&TermToSearch=729424&ordinalpos=1&itool=EntrezSystem2.PEntrez.Gene.Gene_ResultsPanel.Gene_RVDocSum	LOC729424	LOC729424	794	http://www.ncbi.nlm.nih.gov/sites/entrez?Db=gene&Cmd=ShowDetailView&TermToSearch=27152&ordinalpos=1&itool=EntrezSystem2.PEntrez.Gene.Gene_ResultsPanel.Gene_RVDocSum	PDZD6	PDZD6	805	2.5	0.6	1.6	-0.2	0.024	0.00067	0.34	-0.4	0.2	-0.4	-0.3	0.067	0.75	0.72
http://www.ensembl.org/Homo_sapiens/Variation/Summary?v=rs7672155	rs7672155	rs7672155	4	0.97	0.03	0	0	7.5e-05	0.29	-0.12	-0.03	A	C	0.21	http://www.ncbi.nlm.nih.gov/sites/entrez?Db=gene&Cmd=ShowDetailView&TermToSearch=132817&ordinalpos=1&itool=EntrezSystem2.PEntrez.Gene.Gene_ResultsPanel.Gene_RVDocSum	LOC132817	LOC132817	268	http://www.ncbi.nlm.nih.gov/sites/entrez?Db=gene&Cmd=ShowDetailView&TermToSearch=729424&ordinalpos=1&itool=EntrezSystem2.PEntrez.Gene.Gene_ResultsPanel.Gene_RVDocSum	LOC729424	LOC729424	789	http://www.ncbi.nlm.nih.gov/sites/entrez?Db=gene&Cmd=ShowDetailView&TermToSearch=27152&ordinalpos=1&itool=EntrezSystem2.PEntrez.Gene.Gene_ResultsPanel.Gene_RVDocSum	PDZD6	PDZD6	800	2.5	0.6	1.6	-0.2	0.023	0.00068	0.35	-0.4	0.2	-0.4	-0.3	0.052	0.76	0.73
http://www.ensembl.org/Homo_sapiens/Variation/Summary?v=rs7696767	rs7696767	rs7696767	4	0.97	0.03	0	0	7.5e-05	0.29	-0.12	-0.03	T	C	0.21	http://www.ncbi.nlm.nih.gov/sites/entrez?Db=gene&Cmd=ShowDetailView&TermToSearch=132817&ordinalpos=1&itool=EntrezSystem2.PEntrez.Gene.Gene_ResultsPanel.Gene_RVDocSum	LOC132817	LOC132817	268	http://www.ncbi.nlm.nih.gov/sites/entrez?Db=gene&Cmd=ShowDetailView&TermToSearch=729424&ordinalpos=1&itool=EntrezSystem2.PEntrez.Gene.Gene_ResultsPanel.Gene_RVDocSum	LOC729424	LOC729424	789	http://www.ncbi.nlm.nih.gov/sites/entrez?Db=gene&Cmd=ShowDetailView&TermToSearch=27152&ordinalpos=1&itool=EntrezSystem2.PEntrez.Gene.Gene_ResultsPanel.Gene_RVDocSum	PDZD6	PDZD6	800	2.5	0.6	1.6	-0.2	0.024	0.00067	0.35	-0.4	0.2	-0.4	-0.3	0.05	0.75	0.73
http://www.ensembl.org/Homo_sapiens/Variation/Summary?v=rs6829454	rs6829454	rs6829454	4	0.98	0.02	0	0	8.3e-05	0.28	-0.11	-0.03	A	G	0.21	http://www.ncbi.nlm.nih.gov/sites/entrez?Db=gene&Cmd=ShowDetailView&TermToSearch=132817&ordinalpos=1&itool=EntrezSystem2.PEntrez.Gene.Gene_ResultsPanel.Gene_RVDocSum	LOC132817	LOC132817	268	http://www.ncbi.nlm.nih.gov/sites/entrez?Db=gene&Cmd=ShowDetailView&TermToSearch=729424&ordinalpos=1&itool=EntrezSystem2.PEntrez.Gene.Gene_ResultsPanel.Gene_RVDocSum	LOC729424	LOC729424	789	http://www.ncbi.nlm.nih.gov/sites/entrez?Db=gene&Cmd=ShowDetailView&TermToSearch=27152&ordinalpos=1&itool=EntrezSystem2.PEntrez.Gene.Gene_ResultsPanel.Gene_RVDocSum	PDZD6	PDZD6	800	2.4	0.6	1.6	-0.2	0.024	0.00061	0.4	-0.4	0.2	-0.4	-0.3	0.05	0.75	0.76
http://www.ensembl.org/Homo_sapiens/Variation/Summary?v=rs1503605	rs1503605	rs1503605	4	0.98	0.02	0	0	0.0001	0.3	-0.11	-0.03	A	G	0.21	http://www.ncbi.nlm.nih.gov/sites/entrez?Db=gene&Cmd=ShowDetailView&TermToSearch=132817&ordinalpos=1&itool=EntrezSystem2.PEntrez.Gene.Gene_ResultsPanel.Gene_RVDocSum	LOC132817	LOC132817	273	http://www.ncbi.nlm.nih.gov/sites/entrez?Db=gene&Cmd=ShowDetailView&TermToSearch=729424&ordinalpos=1&itool=EntrezSystem2.PEntrez.Gene.Gene_ResultsPanel.Gene_RVDocSum	LOC729424	LOC729424	784	http://www.ncbi.nlm.nih.gov/sites/entrez?Db=gene&Cmd=ShowDetailView&TermToSearch=27152&ordinalpos=1&itool=EntrezSystem2.PEntrez.Gene.Gene_ResultsPanel.Gene_RVDocSum	PDZD6	PDZD6	795	2.3	0.5	1.5	-0.2	0.028	0.0009	0.33	-0.4	0.2	-0.4	-0.3	0.052	0.7	0.78
http://www.ensembl.org/Homo_sapiens/Variation/Summary?v=rs1976483	rs1976483	rs1976483	4	0.98	0.02	0	0	9.1e-05	0.29	-0.11	-0.03	A	G	0.2	http://www.ncbi.nlm.nih.gov/sites/entrez?Db=gene&Cmd=ShowDetailView&TermToSearch=132817&ordinalpos=1&itool=EntrezSystem2.PEntrez.Gene.Gene_ResultsPanel.Gene_RVDocSum	LOC132817	LOC132817	275	http://www.ncbi.nlm.nih.gov/sites/entrez?Db=gene&Cmd=ShowDetailView&TermToSearch=729424&ordinalpos=1&itool=EntrezSystem2.PEntrez.Gene.Gene_ResultsPanel.Gene_RVDocSum	LOC729424	LOC729424	782	http://www.ncbi.nlm.nih.gov/sites/entrez?Db=gene&Cmd=ShowDetailView&TermToSearch=27152&ordinalpos=1&itool=EntrezSystem2.PEntrez.Gene.Gene_ResultsPanel.Gene_RVDocSum	PDZD6	PDZD6	793	2.4	0.5	1.5	-0.2	0.027	0.00094	0.3	-0.4	0.2	-0.4	-0.3	0.051	0.71	0.79
http://www.ensembl.org/Homo_sapiens/Variation/Summary?v=rs1503606	rs1503606	rs1503606	4	0.98	0.02	0	0	8.6e-05	0.28	-0.11	-0.03	T	A	0.21	http://www.ncbi.nlm.nih.gov/sites/entrez?Db=gene&Cmd=ShowDetailView&TermToSearch=132817&ordinalpos=1&itool=EntrezSystem2.PEntrez.Gene.Gene_ResultsPanel.Gene_RVDocSum	LOC132817	LOC132817	277	http://www.ncbi.nlm.nih.gov/sites/entrez?Db=gene&Cmd=ShowDetailView&TermToSearch=729424&ordinalpos=1&itool=EntrezSystem2.PEntrez.Gene.Gene_ResultsPanel.Gene_RVDocSum	LOC729424	LOC729424	780	http://www.ncbi.nlm.nih.gov/sites/entrez?Db=gene&Cmd=ShowDetailView&TermToSearch=27152&ordinalpos=1&itool=EntrezSystem2.PEntrez.Gene.Gene_ResultsPanel.Gene_RVDocSum	PDZD6	PDZD6	791	2.4	0.5	1.5	-0.2	0.026	0.00082	0.31	-0.4	0.2	-0.4	-0.3	0.049	0.72	0.79
http://www.ensembl.org/Homo_sapiens/Variation/Summary?v=rs2089061	rs2089061	rs2089061	4	0.98	0.02	0	0	8.3e-05	0.28	-0.12	-0.03	G	C	0.21	http://www.ncbi.nlm.nih.gov/sites/entrez?Db=gene&Cmd=ShowDetailView&TermToSearch=132817&ordinalpos=1&itool=EntrezSystem2.PEntrez.Gene.Gene_ResultsPanel.Gene_RVDocSum	LOC132817	LOC132817	279	http://www.ncbi.nlm.nih.gov/sites/entrez?Db=gene&Cmd=ShowDetailView&TermToSearch=729424&ordinalpos=1&itool=EntrezSystem2.PEntrez.Gene.Gene_ResultsPanel.Gene_RVDocSum	LOC729424	LOC729424	779	http://www.ncbi.nlm.nih.gov/sites/entrez?Db=gene&Cmd=ShowDetailView&TermToSearch=27152&ordinalpos=1&itool=EntrezSystem2.PEntrez.Gene.Gene_ResultsPanel.Gene_RVDocSum	PDZD6	PDZD6	790	2.4	0.5	1.5	-0.2	0.026	0.00085	0.3	-0.4	0.2	-0.4	-0.3	0.049	0.74	0.77
http://www.ensembl.org/Homo_sapiens/Variation/Summary?v=rs1503608	rs1503608	rs1503608	4	0.97	0.03	0	0	6.5e-05	0.3	-0.12	-0.03	G	A	0.21	http://www.ncbi.nlm.nih.gov/sites/entrez?Db=gene&Cmd=ShowDetailView&TermToSearch=132817&ordinalpos=1&itool=EntrezSystem2.PEntrez.Gene.Gene_ResultsPanel.Gene_RVDocSum	LOC132817	LOC132817	279	http://www.ncbi.nlm.nih.gov/sites/entrez?Db=gene&Cmd=ShowDetailView&TermToSearch=729424&ordinalpos=1&itool=EntrezSystem2.PEntrez.Gene.Gene_ResultsPanel.Gene_RVDocSum	LOC729424	LOC729424	778	http://www.ncbi.nlm.nih.gov/sites/entrez?Db=gene&Cmd=ShowDetailView&TermToSearch=27152&ordinalpos=1&itool=EntrezSystem2.PEntrez.Gene.Gene_ResultsPanel.Gene_RVDocSum	PDZD6	PDZD6	789	2.5	0.5	1.6	-0.1	0.026	0.0007	0.27	-0.4	0.2	-0.4	-0.3	0.052	0.73	0.75
http://www.ensembl.org/Homo_sapiens/Variation/Summary?v=rs1503611	rs1503611	rs1503611	4	0.97	0.03	0	0	6.1e-05	0.3	-0.12	-0.03	A	G	0.22	http://www.ncbi.nlm.nih.gov/sites/entrez?Db=gene&Cmd=ShowDetailView&TermToSearch=132817&ordinalpos=1&itool=EntrezSystem2.PEntrez.Gene.Gene_ResultsPanel.Gene_RVDocSum	LOC132817	LOC132817	284	http://www.ncbi.nlm.nih.gov/sites/entrez?Db=gene&Cmd=ShowDetailView&TermToSearch=729424&ordinalpos=1&itool=EntrezSystem2.PEntrez.Gene.Gene_ResultsPanel.Gene_RVDocSum	LOC729424	LOC729424	774	http://www.ncbi.nlm.nih.gov/sites/entrez?Db=gene&Cmd=ShowDetailView&TermToSearch=27152&ordinalpos=1&itool=EntrezSystem2.PEntrez.Gene.Gene_ResultsPanel.Gene_RVDocSum	PDZD6	PDZD6	785	2.6	0.6	1.5	-0.1	0.021	0.00086	0.26	-0.4	0.3	-0.4	-0.3	0.047	0.7	0.66
http://www.ensembl.org/Homo_sapiens/Variation/Summary?v=rs1503612	rs1503612	rs1503612	4	0.97	0.03	0	0	6e-05	0.29	-0.12	-0.03	T	C	0.22	http://www.ncbi.nlm.nih.gov/sites/entrez?Db=gene&Cmd=ShowDetailView&TermToSearch=132817&ordinalpos=1&itool=EntrezSystem2.PEntrez.Gene.Gene_ResultsPanel.Gene_RVDocSum	LOC132817	LOC132817	284	http://www.ncbi.nlm.nih.gov/sites/entrez?Db=gene&Cmd=ShowDetailView&TermToSearch=729424&ordinalpos=1&itool=EntrezSystem2.PEntrez.Gene.Gene_ResultsPanel.Gene_RVDocSum	LOC729424	LOC729424	773	http://www.ncbi.nlm.nih.gov/sites/entrez?Db=gene&Cmd=ShowDetailView&TermToSearch=27152&ordinalpos=1&itool=EntrezSystem2.PEntrez.Gene.Gene_ResultsPanel.Gene_RVDocSum	PDZD6	PDZD6	784	2.6	0.6	1.5	-0.1	0.021	0.00085	0.26	-0.4	0.3	-0.4	-0.3	0.046	0.71	0.65
http://www.ensembl.org/Homo_sapiens/Variation/Summary?v=rs11935382	rs11935382	rs11935382	4	0.96	0.04	0	0	4.8e-05	0.28	-0.12	-0.03	C	T	0.23	http://www.ncbi.nlm.nih.gov/sites/entrez?Db=gene&Cmd=ShowDetailView&TermToSearch=132817&ordinalpos=1&itool=EntrezSystem2.PEntrez.Gene.Gene_ResultsPanel.Gene_RVDocSum	LOC132817	LOC132817	285	http://www.ncbi.nlm.nih.gov/sites/entrez?Db=gene&Cmd=ShowDetailView&TermToSearch=729424&ordinalpos=1&itool=EntrezSystem2.PEntrez.Gene.Gene_ResultsPanel.Gene_RVDocSum	LOC729424	LOC729424	772	http://www.ncbi.nlm.nih.gov/sites/entrez?Db=gene&Cmd=ShowDetailView&TermToSearch=27152&ordinalpos=1&itool=EntrezSystem2.PEntrez.Gene.Gene_ResultsPanel.Gene_RVDocSum	PDZD6	PDZD6	783	2.6	0.6	1.6	-0.1	0.021	0.00058	0.25	-0.3	0.3	-0.4	-0.2	0.046	0.73	0.62
http://www.ensembl.org/Homo_sapiens/Variation/Summary?v=rs10461207	rs10461207	rs10461207	4	0.97	0.03	0	0	6.8e-05	0.28	-0.14	-0.04	A	C	0.19	http://www.ncbi.nlm.nih.gov/sites/entrez?Db=gene&Cmd=ShowDetailView&TermToSearch=132817&ordinalpos=1&itool=EntrezSystem2.PEntrez.Gene.Gene_ResultsPanel.Gene_RVDocSum	LOC132817	LOC132817	285	http://www.ncbi.nlm.nih.gov/sites/entrez?Db=gene&Cmd=ShowDetailView&TermToSearch=729424&ordinalpos=1&itool=EntrezSystem2.PEntrez.Gene.Gene_ResultsPanel.Gene_RVDocSum	LOC729424	LOC729424	772	http://www.ncbi.nlm.nih.gov/sites/entrez?Db=gene&Cmd=ShowDetailView&TermToSearch=27152&ordinalpos=1&itool=EntrezSystem2.PEntrez.Gene.Gene_ResultsPanel.Gene_RVDocSum	PDZD6	PDZD6	783	2.5	0.6	1.5	-0.1	0.023	0.00073	0.25	-0.3	0.3	-0.3	-0.2	0.052	0.66	0.72
http://www.ensembl.org/Homo_sapiens/Variation/Summary?v=rs1948827	rs1948827	rs1948827	4	0.97	0.03	0	0	8.4e-05	0.31	-0.15	-0.04	A	G	0.16	http://www.ncbi.nlm.nih.gov/sites/entrez?Db=gene&Cmd=ShowDetailView&TermToSearch=132817&ordinalpos=1&itool=EntrezSystem2.PEntrez.Gene.Gene_ResultsPanel.Gene_RVDocSum	LOC132817	LOC132817	287	http://www.ncbi.nlm.nih.gov/sites/entrez?Db=gene&Cmd=ShowDetailView&TermToSearch=729424&ordinalpos=1&itool=EntrezSystem2.PEntrez.Gene.Gene_ResultsPanel.Gene_RVDocSum	LOC729424	LOC729424	770	http://www.ncbi.nlm.nih.gov/sites/entrez?Db=gene&Cmd=ShowDetailView&TermToSearch=27152&ordinalpos=1&itool=EntrezSystem2.PEntrez.Gene.Gene_ResultsPanel.Gene_RVDocSum	PDZD6	PDZD6	781	2.5	0.5	1.5	-0.1	0.027	0.00064	0.27	-0.3	0.2	-0.3	-0.2	0.056	0.6	0.72
http://www.ensembl.org/Homo_sapiens/Variation/Summary?v=rs4834144	rs4834144	rs4834144	4	0.98	0.02	0	0	0.00016	0.24	-0.12	-0.04	G	A	0.22	http://www.ncbi.nlm.nih.gov/sites/entrez?Db=gene&Cmd=ShowDetailView&TermToSearch=132817&ordinalpos=1&itool=EntrezSystem2.PEntrez.Gene.Gene_ResultsPanel.Gene_RVDocSum	LOC132817	LOC132817	288	http://www.ncbi.nlm.nih.gov/sites/entrez?Db=gene&Cmd=ShowDetailView&TermToSearch=729424&ordinalpos=1&itool=EntrezSystem2.PEntrez.Gene.Gene_ResultsPanel.Gene_RVDocSum	LOC729424	LOC729424	769	http://www.ncbi.nlm.nih.gov/sites/entrez?Db=gene&Cmd=ShowDetailView&TermToSearch=27152&ordinalpos=1&itool=EntrezSystem2.PEntrez.Gene.Gene_ResultsPanel.Gene_RVDocSum	PDZD6	PDZD6	780	2.4	0.4	1.5	0	0.043	0.00082	0.15	-0.3	0.4	-0.3	-0.2	0.037	0.64	0.49
http://www.ensembl.org/Homo_sapiens/Variation/Summary?v=rs4834146	rs4834146	rs4834146	4	0.98	0.02	0	0	0.00016	0.24	-0.12	-0.04	A	G	0.22	http://www.ncbi.nlm.nih.gov/sites/entrez?Db=gene&Cmd=ShowDetailView&TermToSearch=132817&ordinalpos=1&itool=EntrezSystem2.PEntrez.Gene.Gene_ResultsPanel.Gene_RVDocSum	LOC132817	LOC132817	288	http://www.ncbi.nlm.nih.gov/sites/entrez?Db=gene&Cmd=ShowDetailView&TermToSearch=729424&ordinalpos=1&itool=EntrezSystem2.PEntrez.Gene.Gene_ResultsPanel.Gene_RVDocSum	LOC729424	LOC729424	769	http://www.ncbi.nlm.nih.gov/sites/entrez?Db=gene&Cmd=ShowDetailView&TermToSearch=27152&ordinalpos=1&itool=EntrezSystem2.PEntrez.Gene.Gene_ResultsPanel.Gene_RVDocSum	PDZD6	PDZD6	780	2.4	0.4	1.5	0	0.043	0.00082	0.15	-0.3	0.4	-0.3	-0.2	0.038	0.64	0.48
http://www.ensembl.org/Homo_sapiens/Variation/Summary?v=rs4834147	rs4834147	rs4834147	4	0.98	0.02	0	0	0.00016	0.24	-0.12	-0.04	C	T	0.22	http://www.ncbi.nlm.nih.gov/sites/entrez?Db=gene&Cmd=ShowDetailView&TermToSearch=132817&ordinalpos=1&itool=EntrezSystem2.PEntrez.Gene.Gene_ResultsPanel.Gene_RVDocSum	LOC132817	LOC132817	288	http://www.ncbi.nlm.nih.gov/sites/entrez?Db=gene&Cmd=ShowDetailView&TermToSearch=729424&ordinalpos=1&itool=EntrezSystem2.PEntrez.Gene.Gene_ResultsPanel.Gene_RVDocSum	LOC729424	LOC729424	769	http://www.ncbi.nlm.nih.gov/sites/entrez?Db=gene&Cmd=ShowDetailView&TermToSearch=27152&ordinalpos=1&itool=EntrezSystem2.PEntrez.Gene.Gene_ResultsPanel.Gene_RVDocSum	PDZD6	PDZD6	780	2.4	0.4	1.5	0	0.043	0.00084	0.15	-0.3	0.4	-0.3	-0.2	0.038	0.65	0.48
http://www.ensembl.org/Homo_sapiens/Variation/Summary?v=rs1503633	rs1503633	rs1503633	4	0.98	0.02	0	0	0.00016	0.23	-0.12	-0.04	G	A	0.22	http://www.ncbi.nlm.nih.gov/sites/entrez?Db=gene&Cmd=ShowDetailView&TermToSearch=132817&ordinalpos=1&itool=EntrezSystem2.PEntrez.Gene.Gene_ResultsPanel.Gene_RVDocSum	LOC132817	LOC132817	290	http://www.ncbi.nlm.nih.gov/sites/entrez?Db=gene&Cmd=ShowDetailView&TermToSearch=729424&ordinalpos=1&itool=EntrezSystem2.PEntrez.Gene.Gene_ResultsPanel.Gene_RVDocSum	LOC729424	LOC729424	767	http://www.ncbi.nlm.nih.gov/sites/entrez?Db=gene&Cmd=ShowDetailView&TermToSearch=27152&ordinalpos=1&itool=EntrezSystem2.PEntrez.Gene.Gene_ResultsPanel.Gene_RVDocSum	PDZD6	PDZD6	778	2.4	0.4	1.5	0	0.041	0.00087	0.15	-0.3	0.4	-0.3	-0.2	0.035	0.65	0.47
http://www.ensembl.org/Homo_sapiens/Variation/Summary?v=rs1472701	rs1472701	rs1472701	4	0.98	0.02	0	0	0.00019	0.22	-0.12	-0.04	G	A	0.22	http://www.ncbi.nlm.nih.gov/sites/entrez?Db=gene&Cmd=ShowDetailView&TermToSearch=132817&ordinalpos=1&itool=EntrezSystem2.PEntrez.Gene.Gene_ResultsPanel.Gene_RVDocSum	LOC132817	LOC132817	290	http://www.ncbi.nlm.nih.gov/sites/entrez?Db=gene&Cmd=ShowDetailView&TermToSearch=729424&ordinalpos=1&itool=EntrezSystem2.PEntrez.Gene.Gene_ResultsPanel.Gene_RVDocSum	LOC729424	LOC729424	767	http://www.ncbi.nlm.nih.gov/sites/entrez?Db=gene&Cmd=ShowDetailView&TermToSearch=27152&ordinalpos=1&itool=EntrezSystem2.PEntrez.Gene.Gene_ResultsPanel.Gene_RVDocSum	PDZD6	PDZD6	778	2.3	0.4	1.4	0	0.04	0.0011	0.16	-0.3	0.4	-0.3	-0.2	0.035	0.69	0.42
http://www.ensembl.org/Homo_sapiens/Variation/Summary?v=rs16997940	rs16997940	rs16997940	4	0.98	0.02	0	0	0.00022	0.23	-0.12	-0.04	T	A	0.22	http://www.ncbi.nlm.nih.gov/sites/entrez?Db=gene&Cmd=ShowDetailView&TermToSearch=132817&ordinalpos=1&itool=EntrezSystem2.PEntrez.Gene.Gene_ResultsPanel.Gene_RVDocSum	LOC132817	LOC132817	291	http://www.ncbi.nlm.nih.gov/sites/entrez?Db=gene&Cmd=ShowDetailView&TermToSearch=729424&ordinalpos=1&itool=EntrezSystem2.PEntrez.Gene.Gene_ResultsPanel.Gene_RVDocSum	LOC729424	LOC729424	766	http://www.ncbi.nlm.nih.gov/sites/entrez?Db=gene&Cmd=ShowDetailView&TermToSearch=27152&ordinalpos=1&itool=EntrezSystem2.PEntrez.Gene.Gene_ResultsPanel.Gene_RVDocSum	PDZD6	PDZD6	777	2.2	0.4	1.4	0	0.043	0.0012	0.16	-0.3	0.4	-0.3	-0.1	0.036	0.69	0.42
http://www.ensembl.org/Homo_sapiens/Variation/Summary?v=rs11098899	rs11098899	rs11098899	4	0.98	0.01	0	0	0.00024	0.23	-0.12	-0.04	C	T	0.22	http://www.ncbi.nlm.nih.gov/sites/entrez?Db=gene&Cmd=ShowDetailView&TermToSearch=132817&ordinalpos=1&itool=EntrezSystem2.PEntrez.Gene.Gene_ResultsPanel.Gene_RVDocSum	LOC132817	LOC132817	292	http://www.ncbi.nlm.nih.gov/sites/entrez?Db=gene&Cmd=ShowDetailView&TermToSearch=729424&ordinalpos=1&itool=EntrezSystem2.PEntrez.Gene.Gene_ResultsPanel.Gene_RVDocSum	LOC729424	LOC729424	765	http://www.ncbi.nlm.nih.gov/sites/entrez?Db=gene&Cmd=ShowDetailView&TermToSearch=27152&ordinalpos=1&itool=EntrezSystem2.PEntrez.Gene.Gene_ResultsPanel.Gene_RVDocSum	PDZD6	PDZD6	776	2.2	0.4	1.4	0	0.043	0.0014	0.16	-0.3	0.4	-0.3	-0.1	0.037	0.69	0.42
http://www.ensembl.org/Homo_sapiens/Variation/Summary?v=rs13114412	rs13114412	rs13114412	4	0.99	0.01	0	0	0.00025	0.23	-0.12	-0.04	G	A	0.22	http://www.ncbi.nlm.nih.gov/sites/entrez?Db=gene&Cmd=ShowDetailView&TermToSearch=132817&ordinalpos=1&itool=EntrezSystem2.PEntrez.Gene.Gene_ResultsPanel.Gene_RVDocSum	LOC132817	LOC132817	294	http://www.ncbi.nlm.nih.gov/sites/entrez?Db=gene&Cmd=ShowDetailView&TermToSearch=729424&ordinalpos=1&itool=EntrezSystem2.PEntrez.Gene.Gene_ResultsPanel.Gene_RVDocSum	LOC729424	LOC729424	763	http://www.ncbi.nlm.nih.gov/sites/entrez?Db=gene&Cmd=ShowDetailView&TermToSearch=27152&ordinalpos=1&itool=EntrezSystem2.PEntrez.Gene.Gene_ResultsPanel.Gene_RVDocSum	PDZD6	PDZD6	774	2.2	0.4	1.3	0	0.043	0.0014	0.16	-0.3	0.4	-0.3	-0.1	0.038	0.69	0.41
http://www.ensembl.org/Homo_sapiens/Variation/Summary?v=rs993364	rs993364	rs993364	4	0.97	0.03	0	0	0.00011	0.27	-0.12	-0.03	A	C	0.25	http://www.ncbi.nlm.nih.gov/sites/entrez?Db=gene&Cmd=ShowDetailView&TermToSearch=132817&ordinalpos=1&itool=EntrezSystem2.PEntrez.Gene.Gene_ResultsPanel.Gene_RVDocSum	LOC132817	LOC132817	307	http://www.ncbi.nlm.nih.gov/sites/entrez?Db=gene&Cmd=ShowDetailView&TermToSearch=729424&ordinalpos=1&itool=EntrezSystem2.PEntrez.Gene.Gene_ResultsPanel.Gene_RVDocSum	LOC729424	LOC729424	750	http://www.ncbi.nlm.nih.gov/sites/entrez?Db=gene&Cmd=ShowDetailView&TermToSearch=27152&ordinalpos=1&itool=EntrezSystem2.PEntrez.Gene.Gene_ResultsPanel.Gene_RVDocSum	PDZD6	PDZD6	761	2.5	0.7	1.4	-0.1	0.018	0.0015	0.28	-0.3	0.5	-0.4	-0.1	0.035	0.78	0.29
http://www.ensembl.org/Homo_sapiens/Variation/Summary?v=rs1503630	rs1503630	rs1503630	4	0.97	0.03	0	0	0.0001	0.27	-0.12	-0.03	A	G	0.25	http://www.ncbi.nlm.nih.gov/sites/entrez?Db=gene&Cmd=ShowDetailView&TermToSearch=132817&ordinalpos=1&itool=EntrezSystem2.PEntrez.Gene.Gene_ResultsPanel.Gene_RVDocSum	LOC132817	LOC132817	315	http://www.ncbi.nlm.nih.gov/sites/entrez?Db=gene&Cmd=ShowDetailView&TermToSearch=729424&ordinalpos=1&itool=EntrezSystem2.PEntrez.Gene.Gene_ResultsPanel.Gene_RVDocSum	LOC729424	LOC729424	742	http://www.ncbi.nlm.nih.gov/sites/entrez?Db=gene&Cmd=ShowDetailView&TermToSearch=27152&ordinalpos=1&itool=EntrezSystem2.PEntrez.Gene.Gene_ResultsPanel.Gene_RVDocSum	PDZD6	PDZD6	753	2.5	0.7	1.4	-0.1	0.019	0.0015	0.27	-0.3	0.5	-0.4	-0.1	0.035	0.81	0.26
http://www.ensembl.org/Homo_sapiens/Variation/Summary?v=rs12499264	rs12499264	rs12499264	4	0.97	0.03	0	0	0.00011	0.27	-0.12	-0.03	A	C	0.25	http://www.ncbi.nlm.nih.gov/sites/entrez?Db=gene&Cmd=ShowDetailView&TermToSearch=132817&ordinalpos=1&itool=EntrezSystem2.PEntrez.Gene.Gene_ResultsPanel.Gene_RVDocSum	LOC132817	LOC132817	318	http://www.ncbi.nlm.nih.gov/sites/entrez?Db=gene&Cmd=ShowDetailView&TermToSearch=729424&ordinalpos=1&itool=EntrezSystem2.PEntrez.Gene.Gene_ResultsPanel.Gene_RVDocSum	LOC729424	LOC729424	739	http://www.ncbi.nlm.nih.gov/sites/entrez?Db=gene&Cmd=ShowDetailView&TermToSearch=27152&ordinalpos=1&itool=EntrezSystem2.PEntrez.Gene.Gene_ResultsPanel.Gene_RVDocSum	PDZD6	PDZD6	750	2.5	0.7	1.4	-0.1	0.019	0.0015	0.27	-0.3	0.5	-0.4	-0.1	0.035	0.81	0.26
http://www.ensembl.org/Homo_sapiens/Variation/Summary?v=rs10018143	rs10018143	rs10018143	4	0.98	0.02	0	0	0.00017	0.26	-0.11	-0.03	C	T	0.27	http://www.ncbi.nlm.nih.gov/sites/entrez?Db=gene&Cmd=ShowDetailView&TermToSearch=132817&ordinalpos=1&itool=EntrezSystem2.PEntrez.Gene.Gene_ResultsPanel.Gene_RVDocSum	LOC132817	LOC132817	326	http://www.ncbi.nlm.nih.gov/sites/entrez?Db=gene&Cmd=ShowDetailView&TermToSearch=729424&ordinalpos=1&itool=EntrezSystem2.PEntrez.Gene.Gene_ResultsPanel.Gene_RVDocSum	LOC729424	LOC729424	732	http://www.ncbi.nlm.nih.gov/sites/entrez?Db=gene&Cmd=ShowDetailView&TermToSearch=27152&ordinalpos=1&itool=EntrezSystem2.PEntrez.Gene.Gene_ResultsPanel.Gene_RVDocSum	PDZD6	PDZD6	743	2.4	0.6	1.4	-0.2	0.023	0.0019	0.32	-0.3	0.6	-0.4	-0.2	0.046	0.93	0.37
http://www.ensembl.org/Homo_sapiens/Variation/Summary?v=rs12331011	rs12331011	rs12331011	4	0.98	0.02	0	0	0.0002	0.26	-0.11	-0.03	T	A	0.27	http://www.ncbi.nlm.nih.gov/sites/entrez?Db=gene&Cmd=ShowDetailView&TermToSearch=132817&ordinalpos=1&itool=EntrezSystem2.PEntrez.Gene.Gene_ResultsPanel.Gene_RVDocSum	LOC132817	LOC132817	328	http://www.ncbi.nlm.nih.gov/sites/entrez?Db=gene&Cmd=ShowDetailView&TermToSearch=729424&ordinalpos=1&itool=EntrezSystem2.PEntrez.Gene.Gene_ResultsPanel.Gene_RVDocSum	LOC729424	LOC729424	729	http://www.ncbi.nlm.nih.gov/sites/entrez?Db=gene&Cmd=ShowDetailView&TermToSearch=27152&ordinalpos=1&itool=EntrezSystem2.PEntrez.Gene.Gene_ResultsPanel.Gene_RVDocSum	PDZD6	PDZD6	740	2.4	0.6	1.3	-0.2	0.024	0.0022	0.33	-0.3	0.6	-0.4	-0.2	0.045	0.94	0.37
http://www.ensembl.org/Homo_sapiens/Variation/Summary?v=rs7662706	rs7662706	rs7662706	4	0.97	0.03	0	0	0.00015	0.29	-0.12	-0.03	C	T	0.23	http://www.ncbi.nlm.nih.gov/sites/entrez?Db=gene&Cmd=ShowDetailView&TermToSearch=132817&ordinalpos=1&itool=EntrezSystem2.PEntrez.Gene.Gene_ResultsPanel.Gene_RVDocSum	LOC132817	LOC132817	333	http://www.ncbi.nlm.nih.gov/sites/entrez?Db=gene&Cmd=ShowDetailView&TermToSearch=729424&ordinalpos=1&itool=EntrezSystem2.PEntrez.Gene.Gene_ResultsPanel.Gene_RVDocSum	LOC729424	LOC729424	724	http://www.ncbi.nlm.nih.gov/sites/entrez?Db=gene&Cmd=ShowDetailView&TermToSearch=27152&ordinalpos=1&itool=EntrezSystem2.PEntrez.Gene.Gene_ResultsPanel.Gene_RVDocSum	PDZD6	PDZD6	735	2.5	0.5	1.4	-0.2	0.026	0.0022	0.32	-0.3	0.4	-0.4	-0.3	0.055	0.92	0.57
http://www.ensembl.org/Homo_sapiens/Variation/Summary?v=rs1995902	rs1995902	rs1995902	4	0.98	0.02	0	0	0.00018	0.29	-0.11	-0.03	A	T	0.23	http://www.ncbi.nlm.nih.gov/sites/entrez?Db=gene&Cmd=ShowDetailView&TermToSearch=132817&ordinalpos=1&itool=EntrezSystem2.PEntrez.Gene.Gene_ResultsPanel.Gene_RVDocSum	LOC132817	LOC132817	335	http://www.ncbi.nlm.nih.gov/sites/entrez?Db=gene&Cmd=ShowDetailView&TermToSearch=729424&ordinalpos=1&itool=EntrezSystem2.PEntrez.Gene.Gene_ResultsPanel.Gene_RVDocSum	LOC729424	LOC729424	723	http://www.ncbi.nlm.nih.gov/sites/entrez?Db=gene&Cmd=ShowDetailView&TermToSearch=27152&ordinalpos=1&itool=EntrezSystem2.PEntrez.Gene.Gene_ResultsPanel.Gene_RVDocSum	PDZD6	PDZD6	734	2.4	0.5	1.5	-0.2	0.03	0.0022	0.34	-0.3	0.4	-0.4	-0.3	0.051	0.86	0.54
http://www.ensembl.org/Homo_sapiens/Variation/Summary?v=rs17274049	rs17274049	rs17274049	4	0.97	0.03	0	0	0.00015	0.28	-0.11	-0.03	C	T	0.24	http://www.ncbi.nlm.nih.gov/sites/entrez?Db=gene&Cmd=ShowDetailView&TermToSearch=132817&ordinalpos=1&itool=EntrezSystem2.PEntrez.Gene.Gene_ResultsPanel.Gene_RVDocSum	LOC132817	LOC132817	335	http://www.ncbi.nlm.nih.gov/sites/entrez?Db=gene&Cmd=ShowDetailView&TermToSearch=729424&ordinalpos=1&itool=EntrezSystem2.PEntrez.Gene.Gene_ResultsPanel.Gene_RVDocSum	LOC729424	LOC729424	722	http://www.ncbi.nlm.nih.gov/sites/entrez?Db=gene&Cmd=ShowDetailView&TermToSearch=27152&ordinalpos=1&itool=EntrezSystem2.PEntrez.Gene.Gene_ResultsPanel.Gene_RVDocSum	PDZD6	PDZD6	733	2.5	0.5	1.5	-0.2	0.027	0.0018	0.35	-0.4	0.4	-0.5	-0.3	0.047	0.82	0.51
http://www.ensembl.org/Homo_sapiens/Variation/Summary?v=rs17208298	rs17208298	rs17208298	4	0.97	0.03	0	0	0.00016	0.28	-0.11	-0.03	G	A	0.24	http://www.ncbi.nlm.nih.gov/sites/entrez?Db=gene&Cmd=ShowDetailView&TermToSearch=132817&ordinalpos=1&itool=EntrezSystem2.PEntrez.Gene.Gene_ResultsPanel.Gene_RVDocSum	LOC132817	LOC132817	337	http://www.ncbi.nlm.nih.gov/sites/entrez?Db=gene&Cmd=ShowDetailView&TermToSearch=729424&ordinalpos=1&itool=EntrezSystem2.PEntrez.Gene.Gene_ResultsPanel.Gene_RVDocSum	LOC729424	LOC729424	720	http://www.ncbi.nlm.nih.gov/sites/entrez?Db=gene&Cmd=ShowDetailView&TermToSearch=27152&ordinalpos=1&itool=EntrezSystem2.PEntrez.Gene.Gene_ResultsPanel.Gene_RVDocSum	PDZD6	PDZD6	731	2.5	0.5	1.5	-0.2	0.028	0.0019	0.35	-0.4	0.4	-0.5	-0.3	0.047	0.8	0.51
http://www.ensembl.org/Homo_sapiens/Variation/Summary?v=rs1510674	rs1510674	rs1510674	4	0.97	0.03	0	0	0.00015	0.28	-0.11	-0.03	T	A	0.24	http://www.ncbi.nlm.nih.gov/sites/entrez?Db=gene&Cmd=ShowDetailView&TermToSearch=132817&ordinalpos=1&itool=EntrezSystem2.PEntrez.Gene.Gene_ResultsPanel.Gene_RVDocSum	LOC132817	LOC132817	339	http://www.ncbi.nlm.nih.gov/sites/entrez?Db=gene&Cmd=ShowDetailView&TermToSearch=729424&ordinalpos=1&itool=EntrezSystem2.PEntrez.Gene.Gene_ResultsPanel.Gene_RVDocSum	LOC729424	LOC729424	718	http://www.ncbi.nlm.nih.gov/sites/entrez?Db=gene&Cmd=ShowDetailView&TermToSearch=27152&ordinalpos=1&itool=EntrezSystem2.PEntrez.Gene.Gene_ResultsPanel.Gene_RVDocSum	PDZD6	PDZD6	729	2.5	0.5	1.5	-0.2	0.027	0.0018	0.36	-0.4	0.4	-0.5	-0.3	0.046	0.81	0.51
http://www.ensembl.org/Homo_sapiens/Variation/Summary?v=rs7667215	rs7667215	rs7667215	4	0.97	0.03	0	0	0.00015	0.28	-0.11	-0.03	G	T	0.24	http://www.ncbi.nlm.nih.gov/sites/entrez?Db=gene&Cmd=ShowDetailView&TermToSearch=132817&ordinalpos=1&itool=EntrezSystem2.PEntrez.Gene.Gene_ResultsPanel.Gene_RVDocSum	LOC132817	LOC132817	339	http://www.ncbi.nlm.nih.gov/sites/entrez?Db=gene&Cmd=ShowDetailView&TermToSearch=729424&ordinalpos=1&itool=EntrezSystem2.PEntrez.Gene.Gene_ResultsPanel.Gene_RVDocSum	LOC729424	LOC729424	718	http://www.ncbi.nlm.nih.gov/sites/entrez?Db=gene&Cmd=ShowDetailView&TermToSearch=27152&ordinalpos=1&itool=EntrezSystem2.PEntrez.Gene.Gene_ResultsPanel.Gene_RVDocSum	PDZD6	PDZD6	729	2.5	0.5	1.5	-0.2	0.027	0.0018	0.36	-0.4	0.4	-0.5	-0.3	0.046	0.81	0.51
http://www.ensembl.org/Homo_sapiens/Variation/Summary?v=rs11731081	rs11731081	rs11731081	4	0.97	0.03	0	0	0.00014	0.28	-0.11	-0.03	T	C	0.24	http://www.ncbi.nlm.nih.gov/sites/entrez?Db=gene&Cmd=ShowDetailView&TermToSearch=132817&ordinalpos=1&itool=EntrezSystem2.PEntrez.Gene.Gene_ResultsPanel.Gene_RVDocSum	LOC132817	LOC132817	339	http://www.ncbi.nlm.nih.gov/sites/entrez?Db=gene&Cmd=ShowDetailView&TermToSearch=729424&ordinalpos=1&itool=EntrezSystem2.PEntrez.Gene.Gene_ResultsPanel.Gene_RVDocSum	LOC729424	LOC729424	718	http://www.ncbi.nlm.nih.gov/sites/entrez?Db=gene&Cmd=ShowDetailView&TermToSearch=27152&ordinalpos=1&itool=EntrezSystem2.PEntrez.Gene.Gene_ResultsPanel.Gene_RVDocSum	PDZD6	PDZD6	729	2.5	0.5	1.6	-0.2	0.026	0.0017	0.36	-0.4	0.4	-0.5	-0.3	0.047	0.8	0.5
http://www.ensembl.org/Homo_sapiens/Variation/Summary?v=rs13435810	rs13435810	rs13435810	4	0.97	0.03	0	0	0.00015	0.28	-0.11	-0.03	C	T	0.24	http://www.ncbi.nlm.nih.gov/sites/entrez?Db=gene&Cmd=ShowDetailView&TermToSearch=132817&ordinalpos=1&itool=EntrezSystem2.PEntrez.Gene.Gene_ResultsPanel.Gene_RVDocSum	LOC132817	LOC132817	340	http://www.ncbi.nlm.nih.gov/sites/entrez?Db=gene&Cmd=ShowDetailView&TermToSearch=729424&ordinalpos=1&itool=EntrezSystem2.PEntrez.Gene.Gene_ResultsPanel.Gene_RVDocSum	LOC729424	LOC729424	717	http://www.ncbi.nlm.nih.gov/sites/entrez?Db=gene&Cmd=ShowDetailView&TermToSearch=27152&ordinalpos=1&itool=EntrezSystem2.PEntrez.Gene.Gene_ResultsPanel.Gene_RVDocSum	PDZD6	PDZD6	728	2.5	0.5	1.6	-0.2	0.027	0.0017	0.36	-0.4	0.4	-0.5	-0.3	0.044	0.8	0.51
http://www.ensembl.org/Homo_sapiens/Variation/Summary?v=rs13435387	rs13435387	rs13435387	4	0.98	0.02	0	0	0.00016	0.32	-0.12	-0.03	G	C	0.23	http://www.ncbi.nlm.nih.gov/sites/entrez?Db=gene&Cmd=ShowDetailView&TermToSearch=132817&ordinalpos=1&itool=EntrezSystem2.PEntrez.Gene.Gene_ResultsPanel.Gene_RVDocSum	LOC132817	LOC132817	340	http://www.ncbi.nlm.nih.gov/sites/entrez?Db=gene&Cmd=ShowDetailView&TermToSearch=729424&ordinalpos=1&itool=EntrezSystem2.PEntrez.Gene.Gene_ResultsPanel.Gene_RVDocSum	LOC729424	LOC729424	717	http://www.ncbi.nlm.nih.gov/sites/entrez?Db=gene&Cmd=ShowDetailView&TermToSearch=27152&ordinalpos=1&itool=EntrezSystem2.PEntrez.Gene.Gene_ResultsPanel.Gene_RVDocSum	PDZD6	PDZD6	728	2.4	0.5	1.6	-0.2	0.029	0.0016	0.39	-0.4	0.4	-0.5	-0.3	0.05	0.82	0.51
http://www.ensembl.org/Homo_sapiens/Variation/Summary?v=rs17274383	rs17274383	rs17274383	4	0.98	0.02	0	0	0.00016	0.32	-0.12	-0.03	A	G	0.23	http://www.ncbi.nlm.nih.gov/sites/entrez?Db=gene&Cmd=ShowDetailView&TermToSearch=132817&ordinalpos=1&itool=EntrezSystem2.PEntrez.Gene.Gene_ResultsPanel.Gene_RVDocSum	LOC132817	LOC132817	342	http://www.ncbi.nlm.nih.gov/sites/entrez?Db=gene&Cmd=ShowDetailView&TermToSearch=729424&ordinalpos=1&itool=EntrezSystem2.PEntrez.Gene.Gene_ResultsPanel.Gene_RVDocSum	LOC729424	LOC729424	715	http://www.ncbi.nlm.nih.gov/sites/entrez?Db=gene&Cmd=ShowDetailView&TermToSearch=27152&ordinalpos=1&itool=EntrezSystem2.PEntrez.Gene.Gene_ResultsPanel.Gene_RVDocSum	PDZD6	PDZD6	726	2.4	0.5	1.6	-0.2	0.029	0.0016	0.39	-0.4	0.4	-0.5	-0.3	0.05	0.83	0.51
http://www.ensembl.org/Homo_sapiens/Variation/Summary?v=rs17208690	rs17208690	rs17208690	4	0.98	0.02	0	0	0.00017	0.34	-0.12	-0.03	C	T	0.22	http://www.ncbi.nlm.nih.gov/sites/entrez?Db=gene&Cmd=ShowDetailView&TermToSearch=132817&ordinalpos=1&itool=EntrezSystem2.PEntrez.Gene.Gene_ResultsPanel.Gene_RVDocSum	LOC132817	LOC132817	345	http://www.ncbi.nlm.nih.gov/sites/entrez?Db=gene&Cmd=ShowDetailView&TermToSearch=729424&ordinalpos=1&itool=EntrezSystem2.PEntrez.Gene.Gene_ResultsPanel.Gene_RVDocSum	LOC729424	LOC729424	712	http://www.ncbi.nlm.nih.gov/sites/entrez?Db=gene&Cmd=ShowDetailView&TermToSearch=27152&ordinalpos=1&itool=EntrezSystem2.PEntrez.Gene.Gene_ResultsPanel.Gene_RVDocSum	PDZD6	PDZD6	723	2.4	0.5	1.6	-0.2	0.027	0.0014	0.45	-0.4	0.4	-0.5	-0.3	0.052	0.88	0.54
http://www.ensembl.org/Homo_sapiens/Variation/Summary?v=rs7349633	rs7349633	rs7349633	4	0.87	0.12	0	0	1.4e-05	0.66	0.12	0.01	T	G	0.25	http://www.ncbi.nlm.nih.gov/sites/entrez?Db=gene&Cmd=ShowDetailView&TermToSearch=644042&ordinalpos=1&itool=EntrezSystem2.PEntrez.Gene.Gene_ResultsPanel.Gene_RVDocSum	LOC644042	LOC644042	3	http://www.ncbi.nlm.nih.gov/sites/entrez?Db=gene&Cmd=ShowDetailView&TermToSearch=2160&ordinalpos=1&itool=EntrezSystem2.PEntrez.Gene.Gene_ResultsPanel.Gene_RVDocSum	F11	F11	37	http://www.ncbi.nlm.nih.gov/sites/entrez?Db=gene&Cmd=ShowDetailView&TermToSearch=3818&ordinalpos=1&itool=EntrezSystem2.PEntrez.Gene.Gene_ResultsPanel.Gene_RVDocSum	KLKB1	KLKB1	67	3.2	2.2	1	-0.3	0.00013	0.0056	0.86	-0.6	-0.3	-0.4	-0.3	0.35	0.49	0.53
http://www.ensembl.org/Homo_sapiens/Variation/Summary?v=rs7689330	rs7689330	rs7689330	4	0.87	0.13	0	0	1.3e-05	0.67	0.12	0.01	T	A	0.27	http://www.ncbi.nlm.nih.gov/sites/entrez?Db=gene&Cmd=ShowDetailView&TermToSearch=644042&ordinalpos=1&itool=EntrezSystem2.PEntrez.Gene.Gene_ResultsPanel.Gene_RVDocSum	LOC644042	LOC644042	5	http://www.ncbi.nlm.nih.gov/sites/entrez?Db=gene&Cmd=ShowDetailView&TermToSearch=2160&ordinalpos=1&itool=EntrezSystem2.PEntrez.Gene.Gene_ResultsPanel.Gene_RVDocSum	F11	F11	46	http://www.ncbi.nlm.nih.gov/sites/entrez?Db=gene&Cmd=ShowDetailView&TermToSearch=3818&ordinalpos=1&itool=EntrezSystem2.PEntrez.Gene.Gene_ResultsPanel.Gene_RVDocSum	KLKB1	KLKB1	76	3.2	2.1	0.9	-0.3	0.00015	0.0074	0.74	-0.6	-0.4	-0.4	-0.3	0.34	0.47	0.6
http://www.ensembl.org/Homo_sapiens/Variation/Summary?v=rs6552974	rs6552974	rs6552974	4	0.87	0.13	0	0	1.3e-05	0.66	0.12	0.01	T	C	0.27	http://www.ncbi.nlm.nih.gov/sites/entrez?Db=gene&Cmd=ShowDetailView&TermToSearch=644042&ordinalpos=1&itool=EntrezSystem2.PEntrez.Gene.Gene_ResultsPanel.Gene_RVDocSum	LOC644042	LOC644042	6	http://www.ncbi.nlm.nih.gov/sites/entrez?Db=gene&Cmd=ShowDetailView&TermToSearch=2160&ordinalpos=1&itool=EntrezSystem2.PEntrez.Gene.Gene_ResultsPanel.Gene_RVDocSum	F11	F11	47	http://www.ncbi.nlm.nih.gov/sites/entrez?Db=gene&Cmd=ShowDetailView&TermToSearch=3818&ordinalpos=1&itool=EntrezSystem2.PEntrez.Gene.Gene_ResultsPanel.Gene_RVDocSum	KLKB1	KLKB1	77	3.2	2.1	0.9	-0.3	0.00015	0.0074	0.74	-0.6	-0.4	-0.4	-0.3	0.34	0.47	0.61
http://www.ensembl.org/Homo_sapiens/Variation/Summary?v=rs13143852	rs13143852	rs13143852	4	0.87	0.13	0	0	1.3e-05	0.66	0.12	0.01	A	G	0.27	http://www.ncbi.nlm.nih.gov/sites/entrez?Db=gene&Cmd=ShowDetailView&TermToSearch=644042&ordinalpos=1&itool=EntrezSystem2.PEntrez.Gene.Gene_ResultsPanel.Gene_RVDocSum	LOC644042	LOC644042	7	http://www.ncbi.nlm.nih.gov/sites/entrez?Db=gene&Cmd=ShowDetailView&TermToSearch=2160&ordinalpos=1&itool=EntrezSystem2.PEntrez.Gene.Gene_ResultsPanel.Gene_RVDocSum	F11	F11	47	http://www.ncbi.nlm.nih.gov/sites/entrez?Db=gene&Cmd=ShowDetailView&TermToSearch=3818&ordinalpos=1&itool=EntrezSystem2.PEntrez.Gene.Gene_ResultsPanel.Gene_RVDocSum	KLKB1	KLKB1	78	3.2	2.1	0.9	-0.3	0.00016	0.0074	0.74	-0.6	-0.4	-0.4	-0.3	0.34	0.47	0.61
http://www.ensembl.org/Homo_sapiens/Variation/Summary?v=rs13148903	rs13148903	rs13148903	4	0.87	0.13	0	0	1.3e-05	0.63	0.12	0.01	G	A	0.25	http://www.ncbi.nlm.nih.gov/sites/entrez?Db=gene&Cmd=ShowDetailView&TermToSearch=644042&ordinalpos=1&itool=EntrezSystem2.PEntrez.Gene.Gene_ResultsPanel.Gene_RVDocSum	LOC644042	LOC644042	7	http://www.ncbi.nlm.nih.gov/sites/entrez?Db=gene&Cmd=ShowDetailView&TermToSearch=2160&ordinalpos=1&itool=EntrezSystem2.PEntrez.Gene.Gene_ResultsPanel.Gene_RVDocSum	F11	F11	48	http://www.ncbi.nlm.nih.gov/sites/entrez?Db=gene&Cmd=ShowDetailView&TermToSearch=3818&ordinalpos=1&itool=EntrezSystem2.PEntrez.Gene.Gene_ResultsPanel.Gene_RVDocSum	KLKB1	KLKB1	78	3.2	2.2	0.9	-0.3	0.00014	0.0087	0.79	-0.6	-0.4	-0.4	-0.3	0.33	0.48	0.6
http://www.ensembl.org/Homo_sapiens/Variation/Summary?v=rs13150040	rs13150040	rs13150040	4	0.88	0.12	0	0	1.4e-05	0.63	0.12	0.01	T	G	0.25	http://www.ncbi.nlm.nih.gov/sites/entrez?Db=gene&Cmd=ShowDetailView&TermToSearch=644042&ordinalpos=1&itool=EntrezSystem2.PEntrez.Gene.Gene_ResultsPanel.Gene_RVDocSum	LOC644042	LOC644042	7	http://www.ncbi.nlm.nih.gov/sites/entrez?Db=gene&Cmd=ShowDetailView&TermToSearch=2160&ordinalpos=1&itool=EntrezSystem2.PEntrez.Gene.Gene_ResultsPanel.Gene_RVDocSum	F11	F11	48	http://www.ncbi.nlm.nih.gov/sites/entrez?Db=gene&Cmd=ShowDetailView&TermToSearch=3818&ordinalpos=1&itool=EntrezSystem2.PEntrez.Gene.Gene_ResultsPanel.Gene_RVDocSum	KLKB1	KLKB1	78	3.2	2.1	0.9	-0.3	0.00014	0.0088	0.79	-0.6	-0.4	-0.4	-0.3	0.33	0.48	0.61
http://www.ensembl.org/Homo_sapiens/Variation/Summary?v=rs13149934	rs13149934	rs13149934	4	0.88	0.12	0	0	1.4e-05	0.62	0.13	0.01	T	C	0.25	http://www.ncbi.nlm.nih.gov/sites/entrez?Db=gene&Cmd=ShowDetailView&TermToSearch=644042&ordinalpos=1&itool=EntrezSystem2.PEntrez.Gene.Gene_ResultsPanel.Gene_RVDocSum	LOC644042	LOC644042	7	http://www.ncbi.nlm.nih.gov/sites/entrez?Db=gene&Cmd=ShowDetailView&TermToSearch=2160&ordinalpos=1&itool=EntrezSystem2.PEntrez.Gene.Gene_ResultsPanel.Gene_RVDocSum	F11	F11	48	http://www.ncbi.nlm.nih.gov/sites/entrez?Db=gene&Cmd=ShowDetailView&TermToSearch=3818&ordinalpos=1&itool=EntrezSystem2.PEntrez.Gene.Gene_ResultsPanel.Gene_RVDocSum	KLKB1	KLKB1	78	3.2	2.1	0.9	-0.3	0.00014	0.0087	0.79	-0.6	-0.3	-0.4	-0.3	0.32	0.48	0.61
rs-link	rsnum	SNP	chr	HO	HS	HD	HS+D	P-value-S	P-value-D	Effect-S	Effect-D	Minor Allele	Major Allele	MAF	GENE1-link	GENE1	GENE1	dist1 (Kb)	GENE2-link	GENE2	GENE2	dist2 (Kb)	GENE3-link	GENE3	GENE3	dist3 (Kb)	log10BF-S	log10BF-S-TNT	log10BF-S-PRINCE	log10BF-S-CAP	P-value-S-TNT	P-value-S-PRINCE	P-value-S-CAP	log10BF-D	log10BF-D-TNT	log10BF-D-PRINCE	log10BF-D-CAP	P-value-D-TNT	P-value-D-PRINCE	P-value-D-CAP
http://www.ensembl.org/Homo_sapiens/Variation/Summary?v=rs13150348	rs13150348	rs13150348	4	0.86	0.14	0	0	1.2e-05	0.63	0.13	0.01	T	C	0.25	http://www.ncbi.nlm.nih.gov/sites/entrez?Db=gene&Cmd=ShowDetailView&TermToSearch=644042&ordinalpos=1&itool=EntrezSystem2.PEntrez.Gene.Gene_ResultsPanel.Gene_RVDocSum	LOC644042	LOC644042	7	http://www.ncbi.nlm.nih.gov/sites/entrez?Db=gene&Cmd=ShowDetailView&TermToSearch=2160&ordinalpos=1&itool=EntrezSystem2.PEntrez.Gene.Gene_ResultsPanel.Gene_RVDocSum	F11	F11	48	http://www.ncbi.nlm.nih.gov/sites/entrez?Db=gene&Cmd=ShowDetailView&TermToSearch=3818&ordinalpos=1&itool=EntrezSystem2.PEntrez.Gene.Gene_ResultsPanel.Gene_RVDocSum	KLKB1	KLKB1	78	3.2	2.2	0.9	-0.3	0.00014	0.0078	0.79	-0.6	-0.3	-0.3	-0.3	0.32	0.47	0.62
http://www.ensembl.org/Homo_sapiens/Variation/Summary?v=rs9684748	rs9684748	rs9684748	4	0.99	0	0	0.01	0.7	3e-06	-0.01	0.11	A	C	0.39	http://www.ncbi.nlm.nih.gov/sites/entrez?Db=gene&Cmd=ShowDetailView&TermToSearch=644282&ordinalpos=1&itool=EntrezSystem2.PEntrez.Gene.Gene_ResultsPanel.Gene_RVDocSum	LOC644282	LOC644282	44	http://www.ncbi.nlm.nih.gov/sites/entrez?Db=gene&Cmd=ShowDetailView&TermToSearch=644325&ordinalpos=1&itool=EntrezSystem2.PEntrez.Gene.Gene_ResultsPanel.Gene_RVDocSum	LOC644325	LOC644325	348	http://www.ncbi.nlm.nih.gov/sites/entrez?Db=gene&Cmd=ShowDetailView&TermToSearch=347706&ordinalpos=1&itool=EntrezSystem2.PEntrez.Gene.Gene_ResultsPanel.Gene_RVDocSum	MRPS36P2	MRPS36P2	497	-0.7	-0.4	-0.5	-0.4	0.39	0.77	0.9	3.7	1.3	1.8	-0.3	0.0015	0.00037	0.4
http://www.ensembl.org/Homo_sapiens/Variation/Summary?v=rs7676864	rs7676864	rs7676864	4	0.99	0	0	0.01	0.71	3.3e-06	-0.01	0.11	C	T	0.39	http://www.ncbi.nlm.nih.gov/sites/entrez?Db=gene&Cmd=ShowDetailView&TermToSearch=644282&ordinalpos=1&itool=EntrezSystem2.PEntrez.Gene.Gene_ResultsPanel.Gene_RVDocSum	LOC644282	LOC644282	41	http://www.ncbi.nlm.nih.gov/sites/entrez?Db=gene&Cmd=ShowDetailView&TermToSearch=644325&ordinalpos=1&itool=EntrezSystem2.PEntrez.Gene.Gene_ResultsPanel.Gene_RVDocSum	LOC644325	LOC644325	346	http://www.ncbi.nlm.nih.gov/sites/entrez?Db=gene&Cmd=ShowDetailView&TermToSearch=347706&ordinalpos=1&itool=EntrezSystem2.PEntrez.Gene.Gene_ResultsPanel.Gene_RVDocSum	MRPS36P2	MRPS36P2	499	-0.7	-0.4	-0.5	-0.4	0.39	0.76	0.9	3.7	1.3	1.8	-0.3	0.0015	0.0004	0.4
http://www.ensembl.org/Homo_sapiens/Variation/Summary?v=rs998344	rs998344	rs998344	4	0.99	0	0.01	0.01	0.71	2.7e-06	-0.01	0.11	A	G	0.39	http://www.ncbi.nlm.nih.gov/sites/entrez?Db=gene&Cmd=ShowDetailView&TermToSearch=644282&ordinalpos=1&itool=EntrezSystem2.PEntrez.Gene.Gene_ResultsPanel.Gene_RVDocSum	LOC644282	LOC644282	28	http://www.ncbi.nlm.nih.gov/sites/entrez?Db=gene&Cmd=ShowDetailView&TermToSearch=644325&ordinalpos=1&itool=EntrezSystem2.PEntrez.Gene.Gene_ResultsPanel.Gene_RVDocSum	LOC644325	LOC644325	333	http://www.ncbi.nlm.nih.gov/sites/entrez?Db=gene&Cmd=ShowDetailView&TermToSearch=347706&ordinalpos=1&itool=EntrezSystem2.PEntrez.Gene.Gene_ResultsPanel.Gene_RVDocSum	MRPS36P2	MRPS36P2	512	-0.7	-0.4	-0.5	-0.4	0.39	0.76	0.91	3.7	1.3	1.8	-0.2	0.0015	0.00035	0.38
http://www.ensembl.org/Homo_sapiens/Variation/Summary?v=rs6553064	rs6553064	rs6553064	4	0.99	0	0	0.01	0.44	3.1e-06	-0.02	0.11	G	A	0.4	http://www.ncbi.nlm.nih.gov/sites/entrez?Db=gene&Cmd=ShowDetailView&TermToSearch=644282&ordinalpos=1&itool=EntrezSystem2.PEntrez.Gene.Gene_ResultsPanel.Gene_RVDocSum	LOC644282	LOC644282	18	http://www.ncbi.nlm.nih.gov/sites/entrez?Db=gene&Cmd=ShowDetailView&TermToSearch=644325&ordinalpos=1&itool=EntrezSystem2.PEntrez.Gene.Gene_ResultsPanel.Gene_RVDocSum	LOC644325	LOC644325	323	http://www.ncbi.nlm.nih.gov/sites/entrez?Db=gene&Cmd=ShowDetailView&TermToSearch=347706&ordinalpos=1&itool=EntrezSystem2.PEntrez.Gene.Gene_ResultsPanel.Gene_RVDocSum	MRPS36P2	MRPS36P2	523	-0.7	-0.4	-0.5	-0.3	0.39	0.88	0.51	3.6	1.4	2.2	-0.4	0.0011	0.00011	0.86
http://www.ensembl.org/Homo_sapiens/Variation/Summary?v=rs1431005	rs1431005	rs1431005	4	0.98	0	0.01	0.01	0.47	2e-06	-0.02	0.11	A	G	0.4	http://www.ncbi.nlm.nih.gov/sites/entrez?Db=gene&Cmd=ShowDetailView&TermToSearch=644282&ordinalpos=1&itool=EntrezSystem2.PEntrez.Gene.Gene_ResultsPanel.Gene_RVDocSum	LOC644282	LOC644282	17	http://www.ncbi.nlm.nih.gov/sites/entrez?Db=gene&Cmd=ShowDetailView&TermToSearch=644325&ordinalpos=1&itool=EntrezSystem2.PEntrez.Gene.Gene_ResultsPanel.Gene_RVDocSum	LOC644325	LOC644325	322	http://www.ncbi.nlm.nih.gov/sites/entrez?Db=gene&Cmd=ShowDetailView&TermToSearch=347706&ordinalpos=1&itool=EntrezSystem2.PEntrez.Gene.Gene_ResultsPanel.Gene_RVDocSum	MRPS36P2	MRPS36P2	523	-0.7	-0.5	-0.5	-0.3	0.44	0.87	0.5	3.8	1.5	2.2	-0.4	0.00082	0.00011	0.82
http://www.ensembl.org/Homo_sapiens/Variation/Summary?v=rs978629	rs978629	rs978629	4	0.99	0	0	0.01	0.43	2.8e-06	-0.02	0.11	G	A	0.39	http://www.ncbi.nlm.nih.gov/sites/entrez?Db=gene&Cmd=ShowDetailView&TermToSearch=644282&ordinalpos=1&itool=EntrezSystem2.PEntrez.Gene.Gene_ResultsPanel.Gene_RVDocSum	LOC644282	LOC644282	15	http://www.ncbi.nlm.nih.gov/sites/entrez?Db=gene&Cmd=ShowDetailView&TermToSearch=644325&ordinalpos=1&itool=EntrezSystem2.PEntrez.Gene.Gene_ResultsPanel.Gene_RVDocSum	LOC644325	LOC644325	320	http://www.ncbi.nlm.nih.gov/sites/entrez?Db=gene&Cmd=ShowDetailView&TermToSearch=347706&ordinalpos=1&itool=EntrezSystem2.PEntrez.Gene.Gene_ResultsPanel.Gene_RVDocSum	MRPS36P2	MRPS36P2	525	-0.7	-0.4	-0.5	-0.3	0.37	0.88	0.51	3.6	1.4	2.2	-0.4	0.0011	0.00012	0.79
http://www.ensembl.org/Homo_sapiens/Variation/Summary?v=rs4623072	rs4623072	rs4623072	4	0.99	0	0	0.01	0.4	3.4e-06	-0.02	0.11	C	G	0.38	http://www.ncbi.nlm.nih.gov/sites/entrez?Db=gene&Cmd=ShowDetailView&TermToSearch=644282&ordinalpos=1&itool=EntrezSystem2.PEntrez.Gene.Gene_ResultsPanel.Gene_RVDocSum	LOC644282	LOC644282	15	http://www.ncbi.nlm.nih.gov/sites/entrez?Db=gene&Cmd=ShowDetailView&TermToSearch=644325&ordinalpos=1&itool=EntrezSystem2.PEntrez.Gene.Gene_ResultsPanel.Gene_RVDocSum	LOC644325	LOC644325	287	http://www.ncbi.nlm.nih.gov/sites/entrez?Db=gene&Cmd=ShowDetailView&TermToSearch=389249&ordinalpos=1&itool=EntrezSystem2.PEntrez.Gene.Gene_ResultsPanel.Gene_RVDocSum	LOC389249	LOC389249	511	-0.6	-0.4	-0.5	-0.3	0.33	0.78	0.42	3.6	1.4	2.3	-0.3	0.0013	0.0001	0.86
http://www.ensembl.org/Homo_sapiens/Variation/Summary?v=rs6554906	rs6554906	rs6554906	5	0.88	0.11	0	0	1.5e-05	0.52	0.15	-0.02	C	T	0.27	http://www.ncbi.nlm.nih.gov/sites/entrez?Db=gene&Cmd=ShowDetailView&TermToSearch=23194&ordinalpos=1&itool=EntrezSystem2.PEntrez.Gene.Gene_ResultsPanel.Gene_RVDocSum	FBXL7	FBXL7	0	http://www.ncbi.nlm.nih.gov/sites/entrez?Db=gene&Cmd=ShowDetailView&TermToSearch=441061&ordinalpos=1&itool=EntrezSystem2.PEntrez.Gene.Gene_ResultsPanel.Gene_RVDocSum	LOC441061	LOC441061	129	http://www.ncbi.nlm.nih.gov/sites/entrez?Db=gene&Cmd=ShowDetailView&TermToSearch=391741&ordinalpos=1&itool=EntrezSystem2.PEntrez.Gene.Gene_ResultsPanel.Gene_RVDocSum	LOC391741	LOC391741	486	3.2	0.6	1.4	0.3	0.011	0.0028	0.039	-0.5	-0.2	-0.2	-0.3	1	0.26	0.67
http://www.ensembl.org/Homo_sapiens/Variation/Summary?v=rs3810847	rs3810847	rs3810847	5	0.91	0.09	0	0	2.1e-05	0.53	0.15	-0.02	G	A	0.27	http://www.ncbi.nlm.nih.gov/sites/entrez?Db=gene&Cmd=ShowDetailView&TermToSearch=23194&ordinalpos=1&itool=EntrezSystem2.PEntrez.Gene.Gene_ResultsPanel.Gene_RVDocSum	FBXL7	FBXL7	0	http://www.ncbi.nlm.nih.gov/sites/entrez?Db=gene&Cmd=ShowDetailView&TermToSearch=441061&ordinalpos=1&itool=EntrezSystem2.PEntrez.Gene.Gene_ResultsPanel.Gene_RVDocSum	LOC441061	LOC441061	129	http://www.ncbi.nlm.nih.gov/sites/entrez?Db=gene&Cmd=ShowDetailView&TermToSearch=391741&ordinalpos=1&itool=EntrezSystem2.PEntrez.Gene.Gene_ResultsPanel.Gene_RVDocSum	LOC391741	LOC391741	487	3	0.6	1.5	0.2	0.011	0.0029	0.053	-0.5	-0.2	-0.2	-0.3	1	0.26	0.64
http://www.ensembl.org/Homo_sapiens/Variation/Summary?v=rs35922	rs35922	rs35922	5	0.99	0.01	0	0	6.4e-05	0.57	0.39	-0.06	T	C	0.04	http://www.ncbi.nlm.nih.gov/sites/entrez?Db=gene&Cmd=ShowDetailView&TermToSearch=54622&ordinalpos=1&itool=EntrezSystem2.PEntrez.Gene.Gene_ResultsPanel.Gene_RVDocSum	ARL15	ARL15	0	http://www.ncbi.nlm.nih.gov/sites/entrez?Db=gene&Cmd=ShowDetailView&TermToSearch=8988&ordinalpos=1&itool=EntrezSystem2.PEntrez.Gene.Gene_ResultsPanel.Gene_RVDocSum	HSPB3	HSPB3	183	http://www.ncbi.nlm.nih.gov/sites/entrez?Db=gene&Cmd=ShowDetailView&TermToSearch=112574&ordinalpos=1&itool=EntrezSystem2.PEntrez.Gene.Gene_ResultsPanel.Gene_RVDocSum	SNAG1	SNAG1	245	2.2	1.3	0	0.2	0.00059	0.26	0.028	-0.2	-0.1	-0.1	0	0.46	0.57	0.4
http://www.ensembl.org/Homo_sapiens/Variation/Summary?v=rs16893020	rs16893020	rs16893020	5	0.99	0.01	0	0	0.00014	0.45	-0.2	-0.04	G	T	0.11	http://www.ncbi.nlm.nih.gov/sites/entrez?Db=gene&Cmd=ShowDetailView&TermToSearch=359748&ordinalpos=1&itool=EntrezSystem2.PEntrez.Gene.Gene_ResultsPanel.Gene_RVDocSum	MRPL49P1	MRPL49P1	7	http://www.ncbi.nlm.nih.gov/sites/entrez?Db=gene&Cmd=ShowDetailView&TermToSearch=285672&ordinalpos=1&itool=EntrezSystem2.PEntrez.Gene.Gene_ResultsPanel.Gene_RVDocSum	P18SRP	P18SRP	55	http://www.ncbi.nlm.nih.gov/sites/entrez?Db=gene&Cmd=ShowDetailView&TermToSearch=401190&ordinalpos=1&itool=EntrezSystem2.PEntrez.Gene.Gene_ResultsPanel.Gene_RVDocSum	R7BP	R7BP	56	2.1	0.6	0	1.2	0.012	0.17	0.00063	-0.3	0.3	0.1	-0.1	0.05	0.14	0.97
http://www.ensembl.org/Homo_sapiens/Variation/Summary?v=rs16872768	rs16872768	rs16872768	5	0.99	0.01	0	0	0.00015	0.72	0.1	-0.01	C	T	0.41	http://www.ncbi.nlm.nih.gov/sites/entrez?Db=gene&Cmd=ShowDetailView&TermToSearch=134359&ordinalpos=1&itool=EntrezSystem2.PEntrez.Gene.Gene_ResultsPanel.Gene_RVDocSum	FLJ35779	FLJ35779	0	http://www.ncbi.nlm.nih.gov/sites/entrez?Db=gene&Cmd=ShowDetailView&TermToSearch=728780&ordinalpos=1&itool=EntrezSystem2.PEntrez.Gene.Gene_ResultsPanel.Gene_RVDocSum	LOC728780	LOC728780	17	http://www.ncbi.nlm.nih.gov/sites/entrez?Db=gene&Cmd=ShowDetailView&TermToSearch=441087&ordinalpos=1&itool=EntrezSystem2.PEntrez.Gene.Gene_ResultsPanel.Gene_RVDocSum	LOC441087	LOC441087	31	2.1	1	0.1	0.1	0.0035	0.067	0.082	-0.7	-0.4	-0.2	-0.1	0.39	0.2	0.19
http://www.ensembl.org/Homo_sapiens/Variation/Summary?v=rs10057967	rs10057967	rs10057967	5	0.99	0.01	0	0	0.00017	0.63	0.09	-0.01	C	T	0.37	http://www.ncbi.nlm.nih.gov/sites/entrez?Db=gene&Cmd=ShowDetailView&TermToSearch=134359&ordinalpos=1&itool=EntrezSystem2.PEntrez.Gene.Gene_ResultsPanel.Gene_RVDocSum	FLJ35779	FLJ35779	0	http://www.ncbi.nlm.nih.gov/sites/entrez?Db=gene&Cmd=ShowDetailView&TermToSearch=441087&ordinalpos=1&itool=EntrezSystem2.PEntrez.Gene.Gene_ResultsPanel.Gene_RVDocSum	LOC441087	LOC441087	16	http://www.ncbi.nlm.nih.gov/sites/entrez?Db=gene&Cmd=ShowDetailView&TermToSearch=728780&ordinalpos=1&itool=EntrezSystem2.PEntrez.Gene.Gene_ResultsPanel.Gene_RVDocSum	LOC728780	LOC728780	32	2.1	0.9	0	0.2	0.0049	0.078	0.064	-0.7	-0.5	-0.3	-0.1	0.41	0.27	0.19
http://www.ensembl.org/Homo_sapiens/Variation/Summary?v=rs3797580	rs3797580	rs3797580	5	0.99	0.01	0	0	0.00017	0.61	0.09	-0.01	G	A	0.37	http://www.ncbi.nlm.nih.gov/sites/entrez?Db=gene&Cmd=ShowDetailView&TermToSearch=134359&ordinalpos=1&itool=EntrezSystem2.PEntrez.Gene.Gene_ResultsPanel.Gene_RVDocSum	FLJ35779	FLJ35779	0	http://www.ncbi.nlm.nih.gov/sites/entrez?Db=gene&Cmd=ShowDetailView&TermToSearch=441087&ordinalpos=1&itool=EntrezSystem2.PEntrez.Gene.Gene_ResultsPanel.Gene_RVDocSum	LOC441087	LOC441087	10	http://www.ncbi.nlm.nih.gov/sites/entrez?Db=gene&Cmd=ShowDetailView&TermToSearch=728780&ordinalpos=1&itool=EntrezSystem2.PEntrez.Gene.Gene_ResultsPanel.Gene_RVDocSum	LOC728780	LOC728780	38	2.1	0.8	0.1	0.1	0.0055	0.067	0.068	-0.7	-0.5	-0.3	-0.1	0.4	0.29	0.22
http://www.ensembl.org/Homo_sapiens/Variation/Summary?v=rs2112347	rs2112347	rs2112347	5	0.99	0.01	0	0	0.00015	0.67	0.09	-0.01	G	T	0.37	http://www.ncbi.nlm.nih.gov/sites/entrez?Db=gene&Cmd=ShowDetailView&TermToSearch=441087&ordinalpos=1&itool=EntrezSystem2.PEntrez.Gene.Gene_ResultsPanel.Gene_RVDocSum	LOC441087	LOC441087	0	http://www.ncbi.nlm.nih.gov/sites/entrez?Db=gene&Cmd=ShowDetailView&TermToSearch=134359&ordinalpos=1&itool=EntrezSystem2.PEntrez.Gene.Gene_ResultsPanel.Gene_RVDocSum	FLJ35779	FLJ35779	7	http://www.ncbi.nlm.nih.gov/sites/entrez?Db=gene&Cmd=ShowDetailView&TermToSearch=728780&ordinalpos=1&itool=EntrezSystem2.PEntrez.Gene.Gene_ResultsPanel.Gene_RVDocSum	LOC728780	LOC728780	50	2.1	0.7	0.4	0	0.0078	0.025	0.13	-0.7	-0.5	-0.2	-0.1	0.41	0.23	0.22
http://www.ensembl.org/Homo_sapiens/Variation/Summary?v=rs4421145	rs4421145	rs4421145	5	0.98	0.02	0	0	0.0001	0.58	-0.1	-0.01	C	G	0.44	http://www.ncbi.nlm.nih.gov/sites/entrez?Db=gene&Cmd=ShowDetailView&TermToSearch=728342&ordinalpos=1&itool=EntrezSystem2.PEntrez.Gene.Gene_ResultsPanel.Gene_RVDocSum	LOC728342	LOC728342	140	http://www.ncbi.nlm.nih.gov/sites/entrez?Db=gene&Cmd=ShowDetailView&TermToSearch=NA&ordinalpos=1&itool=EntrezSystem2.PEntrez.Gene.Gene_ResultsPanel.Gene_RVDocSum	NA	NA	NA	http://www.ncbi.nlm.nih.gov/sites/entrez?Db=gene&Cmd=ShowDetailView&TermToSearch=NA&ordinalpos=1&itool=EntrezSystem2.PEntrez.Gene.Gene_ResultsPanel.Gene_RVDocSum	NA	NA	NA	2.3	3.6	-0.4	-0.2	5.7e-06	0.5	0.29	-0.5	-0.3	-0.4	-0.3	0.38	0.6	0.49
http://www.ensembl.org/Homo_sapiens/Variation/Summary?v=rs1422665	rs1422665	rs1422665	5	0.96	0.03	0	0	0.00066	0.15	-0.09	0.04	T	C	0.27	http://www.ncbi.nlm.nih.gov/sites/entrez?Db=gene&Cmd=ShowDetailView&TermToSearch=55568&ordinalpos=1&itool=EntrezSystem2.PEntrez.Gene.Gene_ResultsPanel.Gene_RVDocSum	GALNT10	GALNT10	0	http://www.ncbi.nlm.nih.gov/sites/entrez?Db=gene&Cmd=ShowDetailView&TermToSearch=79685&ordinalpos=1&itool=EntrezSystem2.PEntrez.Gene.Gene_ResultsPanel.Gene_RVDocSum	SAP30L	SAP30L	69	http://www.ncbi.nlm.nih.gov/sites/entrez?Db=gene&Cmd=ShowDetailView&TermToSearch=9421&ordinalpos=1&itool=EntrezSystem2.PEntrez.Gene.Gene_ResultsPanel.Gene_RVDocSum	HAND1	HAND1	97	2.6	0.3	1.9	-0.2	0.14	0.00073	0.3	-0.3	-0.5	-0.1	0.1	0.96	0.16	0.082
http://www.ensembl.org/Homo_sapiens/Variation/Summary?v=rs7728507	rs7728507	rs7728507	5	0.97	0.03	0	0	0.00075	0.15	-0.09	0.04	T	C	0.26	http://www.ncbi.nlm.nih.gov/sites/entrez?Db=gene&Cmd=ShowDetailView&TermToSearch=55568&ordinalpos=1&itool=EntrezSystem2.PEntrez.Gene.Gene_ResultsPanel.Gene_RVDocSum	GALNT10	GALNT10	0	http://www.ncbi.nlm.nih.gov/sites/entrez?Db=gene&Cmd=ShowDetailView&TermToSearch=79685&ordinalpos=1&itool=EntrezSystem2.PEntrez.Gene.Gene_ResultsPanel.Gene_RVDocSum	SAP30L	SAP30L	67	http://www.ncbi.nlm.nih.gov/sites/entrez?Db=gene&Cmd=ShowDetailView&TermToSearch=9421&ordinalpos=1&itool=EntrezSystem2.PEntrez.Gene.Gene_ResultsPanel.Gene_RVDocSum	HAND1	HAND1	96	2.5	0.3	1.8	-0.2	0.15	0.00075	0.33	-0.3	-0.5	-0.1	0.1	0.96	0.16	0.078
http://www.ensembl.org/Homo_sapiens/Variation/Summary?v=rs2010010	rs2010010	rs2010010	5	0.99	0.01	0	0	0.0002	0.0084	0.09	-0.07	C	T	0.3	http://www.ncbi.nlm.nih.gov/sites/entrez?Db=gene&Cmd=ShowDetailView&TermToSearch=55568&ordinalpos=1&itool=EntrezSystem2.PEntrez.Gene.Gene_ResultsPanel.Gene_RVDocSum	GALNT10	GALNT10	0	http://www.ncbi.nlm.nih.gov/sites/entrez?Db=gene&Cmd=ShowDetailView&TermToSearch=79685&ordinalpos=1&itool=EntrezSystem2.PEntrez.Gene.Gene_ResultsPanel.Gene_RVDocSum	SAP30L	SAP30L	65	http://www.ncbi.nlm.nih.gov/sites/entrez?Db=gene&Cmd=ShowDetailView&TermToSearch=9421&ordinalpos=1&itool=EntrezSystem2.PEntrez.Gene.Gene_ResultsPanel.Gene_RVDocSum	HAND1	HAND1	94	2	-0.3	2.6	-0.1	0.24	4.4e-05	0.18	0.6	-0.2	-0.1	0.1	0.15	0.11	0.071
http://www.ensembl.org/Homo_sapiens/Variation/Summary?v=rs17116042	rs17116042	rs17116042	5	0.96	0.04	0	0	0.00073	0.16	-0.09	0.04	C	T	0.27	http://www.ncbi.nlm.nih.gov/sites/entrez?Db=gene&Cmd=ShowDetailView&TermToSearch=55568&ordinalpos=1&itool=EntrezSystem2.PEntrez.Gene.Gene_ResultsPanel.Gene_RVDocSum	GALNT10	GALNT10	0	http://www.ncbi.nlm.nih.gov/sites/entrez?Db=gene&Cmd=ShowDetailView&TermToSearch=79685&ordinalpos=1&itool=EntrezSystem2.PEntrez.Gene.Gene_ResultsPanel.Gene_RVDocSum	SAP30L	SAP30L	65	http://www.ncbi.nlm.nih.gov/sites/entrez?Db=gene&Cmd=ShowDetailView&TermToSearch=9421&ordinalpos=1&itool=EntrezSystem2.PEntrez.Gene.Gene_ResultsPanel.Gene_RVDocSum	HAND1	HAND1	94	2.6	0.4	1.9	-0.2	0.15	0.00075	0.3	-0.3	-0.5	-0.1	0.1	0.95	0.16	0.084
http://www.ensembl.org/Homo_sapiens/Variation/Summary?v=rs750063	rs750063	rs750063	5	0.98	0.01	0	0.01	0.00012	0.009	0.1	-0.07	A	G	0.28	http://www.ncbi.nlm.nih.gov/sites/entrez?Db=gene&Cmd=ShowDetailView&TermToSearch=55568&ordinalpos=1&itool=EntrezSystem2.PEntrez.Gene.Gene_ResultsPanel.Gene_RVDocSum	GALNT10	GALNT10	0	http://www.ncbi.nlm.nih.gov/sites/entrez?Db=gene&Cmd=ShowDetailView&TermToSearch=79685&ordinalpos=1&itool=EntrezSystem2.PEntrez.Gene.Gene_ResultsPanel.Gene_RVDocSum	SAP30L	SAP30L	65	http://www.ncbi.nlm.nih.gov/sites/entrez?Db=gene&Cmd=ShowDetailView&TermToSearch=9421&ordinalpos=1&itool=EntrezSystem2.PEntrez.Gene.Gene_ResultsPanel.Gene_RVDocSum	HAND1	HAND1	94	2.2	-0.3	2.8	-0.1	0.24	2.2e-05	0.16	0.6	-0.2	0	0.1	0.16	0.11	0.08
http://www.ensembl.org/Homo_sapiens/Variation/Summary?v=rs6870010	rs6870010	rs6870010	5	0.98	0.02	0	0	0.00073	0.11	-0.09	0.04	C	T	0.25	http://www.ncbi.nlm.nih.gov/sites/entrez?Db=gene&Cmd=ShowDetailView&TermToSearch=55568&ordinalpos=1&itool=EntrezSystem2.PEntrez.Gene.Gene_ResultsPanel.Gene_RVDocSum	GALNT10	GALNT10	0	http://www.ncbi.nlm.nih.gov/sites/entrez?Db=gene&Cmd=ShowDetailView&TermToSearch=79685&ordinalpos=1&itool=EntrezSystem2.PEntrez.Gene.Gene_ResultsPanel.Gene_RVDocSum	SAP30L	SAP30L	60	http://www.ncbi.nlm.nih.gov/sites/entrez?Db=gene&Cmd=ShowDetailView&TermToSearch=9421&ordinalpos=1&itool=EntrezSystem2.PEntrez.Gene.Gene_ResultsPanel.Gene_RVDocSum	HAND1	HAND1	89	2.4	0.2	1.9	-0.2	0.16	0.00069	0.4	-0.2	-0.5	-0.1	0.1	0.97	0.14	0.082
http://www.ensembl.org/Homo_sapiens/Variation/Summary?v=rs12193015	rs12193015	rs12193015	6	0.99	0.01	0	0	0.00013	0.6	-0.11	0.02	T	C	0.35	http://www.ncbi.nlm.nih.gov/sites/entrez?Db=gene&Cmd=ShowDetailView&TermToSearch=497048&ordinalpos=1&itool=EntrezSystem2.PEntrez.Gene.Gene_ResultsPanel.Gene_RVDocSum	KU-MEL-3	KU-MEL-3	8	http://www.ncbi.nlm.nih.gov/sites/entrez?Db=gene&Cmd=ShowDetailView&TermToSearch=442153&ordinalpos=1&itool=EntrezSystem2.PEntrez.Gene.Gene_ResultsPanel.Gene_RVDocSum	LOC442153	LOC442153	67	http://www.ncbi.nlm.nih.gov/sites/entrez?Db=gene&Cmd=ShowDetailView&TermToSearch=9425&ordinalpos=1&itool=EntrezSystem2.PEntrez.Gene.Gene_ResultsPanel.Gene_RVDocSum	CDYL	CDYL	86	2.2	1.8	-0.1	0.1	0.00043	0.38	0.093	-0.6	-0.5	-0.2	-0.1	0.51	0.93	0.64
http://www.ensembl.org/Homo_sapiens/Variation/Summary?v=rs9358376	rs9358376	rs9358376	6	0.98	0.02	0	0	6.5e-05	0.6	0.1	-0.01	T	G	0.35	http://www.ncbi.nlm.nih.gov/sites/entrez?Db=gene&Cmd=ShowDetailView&TermToSearch=54901&ordinalpos=1&itool=EntrezSystem2.PEntrez.Gene.Gene_ResultsPanel.Gene_RVDocSum	CDKAL1	CDKAL1	0	http://www.ncbi.nlm.nih.gov/sites/entrez?Db=gene&Cmd=ShowDetailView&TermToSearch=1871&ordinalpos=1&itool=EntrezSystem2.PEntrez.Gene.Gene_ResultsPanel.Gene_RVDocSum	E2F3	E2F3	404	http://www.ncbi.nlm.nih.gov/sites/entrez?Db=gene&Cmd=ShowDetailView&TermToSearch=154141&ordinalpos=1&itool=EntrezSystem2.PEntrez.Gene.Gene_ResultsPanel.Gene_RVDocSum	MBOAT1	MBOAT1	686	2.4	1.4	0.9	-0.3	0.0012	0.0042	0.95	-0.7	-0.5	-0.5	-0.2	0.51	0.62	0.39
http://www.ensembl.org/Homo_sapiens/Variation/Summary?v=rs6456381	rs6456381	rs6456381	6	0.97	0.03	0	0	6.9e-05	0.48	0.11	-0.02	T	A	0.28	http://www.ncbi.nlm.nih.gov/sites/entrez?Db=gene&Cmd=ShowDetailView&TermToSearch=54901&ordinalpos=1&itool=EntrezSystem2.PEntrez.Gene.Gene_ResultsPanel.Gene_RVDocSum	CDKAL1	CDKAL1	0	http://www.ncbi.nlm.nih.gov/sites/entrez?Db=gene&Cmd=ShowDetailView&TermToSearch=1871&ordinalpos=1&itool=EntrezSystem2.PEntrez.Gene.Gene_ResultsPanel.Gene_RVDocSum	E2F3	E2F3	407	http://www.ncbi.nlm.nih.gov/sites/entrez?Db=gene&Cmd=ShowDetailView&TermToSearch=154141&ordinalpos=1&itool=EntrezSystem2.PEntrez.Gene.Gene_ResultsPanel.Gene_RVDocSum	MBOAT1	MBOAT1	689	2.5	1.3	1.4	-0.2	0.0018	0.0011	0.78	-0.5	-0.3	-0.5	-0.3	0.35	0.83	0.6
http://www.ensembl.org/Homo_sapiens/Variation/Summary?v=rs6456382	rs6456382	rs6456382	6	0.98	0.02	0	0	0.00011	0.54	0.11	-0.02	G	A	0.29	http://www.ncbi.nlm.nih.gov/sites/entrez?Db=gene&Cmd=ShowDetailView&TermToSearch=54901&ordinalpos=1&itool=EntrezSystem2.PEntrez.Gene.Gene_ResultsPanel.Gene_RVDocSum	CDKAL1	CDKAL1	0	http://www.ncbi.nlm.nih.gov/sites/entrez?Db=gene&Cmd=ShowDetailView&TermToSearch=1871&ordinalpos=1&itool=EntrezSystem2.PEntrez.Gene.Gene_ResultsPanel.Gene_RVDocSum	E2F3	E2F3	407	http://www.ncbi.nlm.nih.gov/sites/entrez?Db=gene&Cmd=ShowDetailView&TermToSearch=154141&ordinalpos=1&itool=EntrezSystem2.PEntrez.Gene.Gene_ResultsPanel.Gene_RVDocSum	MBOAT1	MBOAT1	689	2.3	1.2	1.4	-0.2	0.0024	0.0013	0.75	-0.6	-0.3	-0.5	-0.3	0.36	0.8	0.63
http://www.ensembl.org/Homo_sapiens/Variation/Summary?v=rs7765765	rs7765765	rs7765765	6	0.99	0.01	0	0	0.0002	0.75	0.15	-0.01	T	C	0.2	http://www.ncbi.nlm.nih.gov/sites/entrez?Db=gene&Cmd=ShowDetailView&TermToSearch=54901&ordinalpos=1&itool=EntrezSystem2.PEntrez.Gene.Gene_ResultsPanel.Gene_RVDocSum	CDKAL1	CDKAL1	0	http://www.ncbi.nlm.nih.gov/sites/entrez?Db=gene&Cmd=ShowDetailView&TermToSearch=1871&ordinalpos=1&itool=EntrezSystem2.PEntrez.Gene.Gene_ResultsPanel.Gene_RVDocSum	E2F3	E2F3	428	http://www.ncbi.nlm.nih.gov/sites/entrez?Db=gene&Cmd=ShowDetailView&TermToSearch=6659&ordinalpos=1&itool=EntrezSystem2.PEntrez.Gene.Gene_ResultsPanel.Gene_RVDocSum	SOX4	SOX4	672	2.1	0.7	1.6	-0.2	0.011	0.00061	0.84	-0.5	-0.3	-0.4	-0.3	0.69	0.96	0.92
http://www.ensembl.org/Homo_sapiens/Variation/Summary?v=rs12662218	rs12662218	rs12662218	6	0.99	0.01	0	0	0.0002	0.76	0.15	-0.01	A	G	0.2	http://www.ncbi.nlm.nih.gov/sites/entrez?Db=gene&Cmd=ShowDetailView&TermToSearch=54901&ordinalpos=1&itool=EntrezSystem2.PEntrez.Gene.Gene_ResultsPanel.Gene_RVDocSum	CDKAL1	CDKAL1	0	http://www.ncbi.nlm.nih.gov/sites/entrez?Db=gene&Cmd=ShowDetailView&TermToSearch=1871&ordinalpos=1&itool=EntrezSystem2.PEntrez.Gene.Gene_ResultsPanel.Gene_RVDocSum	E2F3	E2F3	429	http://www.ncbi.nlm.nih.gov/sites/entrez?Db=gene&Cmd=ShowDetailView&TermToSearch=6659&ordinalpos=1&itool=EntrezSystem2.PEntrez.Gene.Gene_ResultsPanel.Gene_RVDocSum	SOX4	SOX4	671	2.1	0.7	1.6	-0.2	0.011	0.00061	0.84	-0.5	-0.3	-0.4	-0.3	0.69	0.96	0.92
http://www.ensembl.org/Homo_sapiens/Variation/Summary?v=rs6911024	rs6911024	rs6911024	6	0.98	0.02	0	0	5.3e-05	0.55	0.26	-0.04	C	T	0.1	http://www.ncbi.nlm.nih.gov/sites/entrez?Db=gene&Cmd=ShowDetailView&TermToSearch=4276&ordinalpos=1&itool=EntrezSystem2.PEntrez.Gene.Gene_ResultsPanel.Gene_RVDocSum	MICA	MICA	3	http://www.ncbi.nlm.nih.gov/sites/entrez?Db=gene&Cmd=ShowDetailView&TermToSearch=729816&ordinalpos=1&itool=EntrezSystem2.PEntrez.Gene.Gene_ResultsPanel.Gene_RVDocSum	LOC729816	LOC729816	34	http://www.ncbi.nlm.nih.gov/sites/entrez?Db=gene&Cmd=ShowDetailView&TermToSearch=3106&ordinalpos=1&itool=EntrezSystem2.PEntrez.Gene.Gene_ResultsPanel.Gene_RVDocSum	HLA-B	HLA-B	44	2.4	2.3	-0.1	-0.1	6.5e-05	0.32	0.52	-0.3	-0.3	-0.1	0.1	0.88	0.97	0.095
http://www.ensembl.org/Homo_sapiens/Variation/Summary?v=rs2301747	rs2301747	rs2301747	6	0.98	0.02	0	0	9.1e-05	0.52	0.21	-0.03	G	C	0.12	http://www.ncbi.nlm.nih.gov/sites/entrez?Db=gene&Cmd=ShowDetailView&TermToSearch=4276&ordinalpos=1&itool=EntrezSystem2.PEntrez.Gene.Gene_ResultsPanel.Gene_RVDocSum	MICA	MICA	0	http://www.ncbi.nlm.nih.gov/sites/entrez?Db=gene&Cmd=ShowDetailView&TermToSearch=729816&ordinalpos=1&itool=EntrezSystem2.PEntrez.Gene.Gene_ResultsPanel.Gene_RVDocSum	LOC729816	LOC729816	37	http://www.ncbi.nlm.nih.gov/sites/entrez?Db=gene&Cmd=ShowDetailView&TermToSearch=3106&ordinalpos=1&itool=EntrezSystem2.PEntrez.Gene.Gene_ResultsPanel.Gene_RVDocSum	HLA-B	HLA-B	47	2.3	2.6	-0.1	-0.1	3.1e-05	0.47	0.68	-0.3	-0.3	-0.2	0	0.87	0.9	0.16
http://www.ensembl.org/Homo_sapiens/Variation/Summary?v=rs9366886	rs9366886	rs9366886	6	0.95	0.05	0	0	3.9e-05	0.85	-0.12	-0.01	A	G	0.36	http://www.ncbi.nlm.nih.gov/sites/entrez?Db=gene&Cmd=ShowDetailView&TermToSearch=7005&ordinalpos=1&itool=EntrezSystem2.PEntrez.Gene.Gene_ResultsPanel.Gene_RVDocSum	TEAD3	TEAD3	0	http://www.ncbi.nlm.nih.gov/sites/entrez?Db=gene&Cmd=ShowDetailView&TermToSearch=7287&ordinalpos=1&itool=EntrezSystem2.PEntrez.Gene.Gene_ResultsPanel.Gene_RVDocSum	TULP1	TULP1	8	http://www.ncbi.nlm.nih.gov/sites/entrez?Db=gene&Cmd=ShowDetailView&TermToSearch=4736&ordinalpos=1&itool=EntrezSystem2.PEntrez.Gene.Gene_ResultsPanel.Gene_RVDocSum	RPL10A	RPL10A	19	2.7	0.8	1.7	-0.2	0.0088	0.00046	0.57	-0.6	-0.5	-0.2	-0.1	0.8	0.42	0.25
http://www.ensembl.org/Homo_sapiens/Variation/Summary?v=rs7757174	rs7757174	rs7757174	6	0.97	0.03	0	0	4.3e-05	0.98	-0.1	0	G	A	0.48	http://www.ncbi.nlm.nih.gov/sites/entrez?Db=gene&Cmd=ShowDetailView&TermToSearch=7005&ordinalpos=1&itool=EntrezSystem2.PEntrez.Gene.Gene_ResultsPanel.Gene_RVDocSum	TEAD3	TEAD3	0	http://www.ncbi.nlm.nih.gov/sites/entrez?Db=gene&Cmd=ShowDetailView&TermToSearch=7287&ordinalpos=1&itool=EntrezSystem2.PEntrez.Gene.Gene_ResultsPanel.Gene_RVDocSum	TULP1	TULP1	5	http://www.ncbi.nlm.nih.gov/sites/entrez?Db=gene&Cmd=ShowDetailView&TermToSearch=4736&ordinalpos=1&itool=EntrezSystem2.PEntrez.Gene.Gene_ResultsPanel.Gene_RVDocSum	RPL10A	RPL10A	22	2.6	0.6	2.1	-0.3	0.012	0.00015	0.71	-0.7	-0.6	-0.3	-0.1	0.7	0.86	0.29
http://www.ensembl.org/Homo_sapiens/Variation/Summary?v=rs7769417	rs7769417	rs7769417	6	0.99	0.01	0	0	0.00012	0.88	-0.09	0	A	G	0.48	http://www.ncbi.nlm.nih.gov/sites/entrez?Db=gene&Cmd=ShowDetailView&TermToSearch=7287&ordinalpos=1&itool=EntrezSystem2.PEntrez.Gene.Gene_ResultsPanel.Gene_RVDocSum	TULP1	TULP1	0	http://www.ncbi.nlm.nih.gov/sites/entrez?Db=gene&Cmd=ShowDetailView&TermToSearch=7005&ordinalpos=1&itool=EntrezSystem2.PEntrez.Gene.Gene_ResultsPanel.Gene_RVDocSum	TEAD3	TEAD3	8	http://www.ncbi.nlm.nih.gov/sites/entrez?Db=gene&Cmd=ShowDetailView&TermToSearch=4736&ordinalpos=1&itool=EntrezSystem2.PEntrez.Gene.Gene_ResultsPanel.Gene_RVDocSum	RPL10A	RPL10A	34	2.2	0.4	2	-0.4	0.026	0.00021	0.77	-0.7	-0.6	-0.3	0	0.76	0.84	0.23
http://www.ensembl.org/Homo_sapiens/Variation/Summary?v=rs2075611	rs2075611	rs2075611	6	0.97	0.03	0	0	5.8e-05	1	-0.1	0	G	A	0.49	http://www.ncbi.nlm.nih.gov/sites/entrez?Db=gene&Cmd=ShowDetailView&TermToSearch=7287&ordinalpos=1&itool=EntrezSystem2.PEntrez.Gene.Gene_ResultsPanel.Gene_RVDocSum	TULP1	TULP1	0	http://www.ncbi.nlm.nih.gov/sites/entrez?Db=gene&Cmd=ShowDetailView&TermToSearch=7005&ordinalpos=1&itool=EntrezSystem2.PEntrez.Gene.Gene_ResultsPanel.Gene_RVDocSum	TEAD3	TEAD3	10	http://www.ncbi.nlm.nih.gov/sites/entrez?Db=gene&Cmd=ShowDetailView&TermToSearch=4736&ordinalpos=1&itool=EntrezSystem2.PEntrez.Gene.Gene_ResultsPanel.Gene_RVDocSum	RPL10A	RPL10A	36	2.5	0.4	2.1	-0.3	0.022	0.00014	0.6	-0.7	-0.6	-0.3	-0.1	0.75	0.81	0.35
http://www.ensembl.org/Homo_sapiens/Variation/Summary?v=rs11754612	rs11754612	rs11754612	6	0.98	0.02	0	0	7.6e-05	0.68	-0.28	-0.03	A	T	0.13	http://www.ncbi.nlm.nih.gov/sites/entrez?Db=gene&Cmd=ShowDetailView&TermToSearch=7287&ordinalpos=1&itool=EntrezSystem2.PEntrez.Gene.Gene_ResultsPanel.Gene_RVDocSum	TULP1	TULP1	0	http://www.ncbi.nlm.nih.gov/sites/entrez?Db=gene&Cmd=ShowDetailView&TermToSearch=7005&ordinalpos=1&itool=EntrezSystem2.PEntrez.Gene.Gene_ResultsPanel.Gene_RVDocSum	TEAD3	TEAD3	12	http://www.ncbi.nlm.nih.gov/sites/entrez?Db=gene&Cmd=ShowDetailView&TermToSearch=4736&ordinalpos=1&itool=EntrezSystem2.PEntrez.Gene.Gene_ResultsPanel.Gene_RVDocSum	RPL10A	RPL10A	38	2.3	0.4	1.7	-0.1	0.03	0.00017	0.46	-0.3	-0.2	-0.2	-0.1	0.71	0.81	1
http://www.ensembl.org/Homo_sapiens/Variation/Summary?v=rs2281274	rs2281274	rs2281274	6	0.99	0.01	0	0	0.00021	0.89	0.13	0	C	T	0.2	http://www.ncbi.nlm.nih.gov/sites/entrez?Db=gene&Cmd=ShowDetailView&TermToSearch=60481&ordinalpos=1&itool=EntrezSystem2.PEntrez.Gene.Gene_ResultsPanel.Gene_RVDocSum	ELOVL5	ELOVL5	0	http://www.ncbi.nlm.nih.gov/sites/entrez?Db=gene&Cmd=ShowDetailView&TermToSearch=647190&ordinalpos=1&itool=EntrezSystem2.PEntrez.Gene.Gene_ResultsPanel.Gene_RVDocSum	LOC647190	LOC647190	56	http://www.ncbi.nlm.nih.gov/sites/entrez?Db=gene&Cmd=ShowDetailView&TermToSearch=442217&ordinalpos=1&itool=EntrezSystem2.PEntrez.Gene.Gene_ResultsPanel.Gene_RVDocSum	LOC442217	LOC442217	76	2.2	-0.2	1.4	0.2	0.34	0.0012	0.062	-0.6	-0.3	-0.4	-0.3	0.97	0.74	0.79
http://www.ensembl.org/Homo_sapiens/Variation/Summary?v=rs7764828	rs7764828	rs7764828	6	0.99	0.01	0	0	8.6e-05	0.17	0.34	-0.12	G	A	0.21	http://www.ncbi.nlm.nih.gov/sites/entrez?Db=gene&Cmd=ShowDetailView&TermToSearch=5558&ordinalpos=1&itool=EntrezSystem2.PEntrez.Gene.Gene_ResultsPanel.Gene_RVDocSum	PRIM2A	PRIM2A	0	http://www.ncbi.nlm.nih.gov/sites/entrez?Db=gene&Cmd=ShowDetailView&TermToSearch=51715&ordinalpos=1&itool=EntrezSystem2.PEntrez.Gene.Gene_ResultsPanel.Gene_RVDocSum	RAB23	RAB23	350	http://www.ncbi.nlm.nih.gov/sites/entrez?Db=gene&Cmd=ShowDetailView&TermToSearch=9532&ordinalpos=1&itool=EntrezSystem2.PEntrez.Gene.Gene_ResultsPanel.Gene_RVDocSum	BAG2	BAG2	388	2.2	2.2	0.1	0	7.1e-05	0.087	0.27	0	-0.1	0	0	0.34	0.37	0.37
http://www.ensembl.org/Homo_sapiens/Variation/Summary?v=rs12200220	rs12200220	rs12200220	6	0.99	0.01	0	0	0.00018	0.48	0.14	-0.03	A	T	0.18	http://www.ncbi.nlm.nih.gov/sites/entrez?Db=gene&Cmd=ShowDetailView&TermToSearch=55788&ordinalpos=1&itool=EntrezSystem2.PEntrez.Gene.Gene_ResultsPanel.Gene_RVDocSum	LMBRD1	LMBRD1	10	http://www.ncbi.nlm.nih.gov/sites/entrez?Db=gene&Cmd=ShowDetailView&TermToSearch=1310&ordinalpos=1&itool=EntrezSystem2.PEntrez.Gene.Gene_ResultsPanel.Gene_RVDocSum	COL19A1	COL19A1	200	http://www.ncbi.nlm.nih.gov/sites/entrez?Db=gene&Cmd=ShowDetailView&TermToSearch=577&ordinalpos=1&itool=EntrezSystem2.PEntrez.Gene.Gene_ResultsPanel.Gene_RVDocSum	BAI3	BAI3	277	2.1	1.1	0.4	-0.1	0.0032	0.038	0.28	-0.5	-0.3	0	-0.1	0.48	0.14	0.28
http://www.ensembl.org/Homo_sapiens/Variation/Summary?v=rs17568100	rs17568100	rs17568100	6	0.97	0.03	0	0	5.2e-05	0.29	0.14	0.04	T	A	0.17	http://www.ncbi.nlm.nih.gov/sites/entrez?Db=gene&Cmd=ShowDetailView&TermToSearch=22999&ordinalpos=1&itool=EntrezSystem2.PEntrez.Gene.Gene_ResultsPanel.Gene_RVDocSum	RIMS1	RIMS1	0	http://www.ncbi.nlm.nih.gov/sites/entrez?Db=gene&Cmd=ShowDetailView&TermToSearch=441160&ordinalpos=1&itool=EntrezSystem2.PEntrez.Gene.Gene_ResultsPanel.Gene_RVDocSum	LOC441160	LOC441160	379	http://www.ncbi.nlm.nih.gov/sites/entrez?Db=gene&Cmd=ShowDetailView&TermToSearch=79940&ordinalpos=1&itool=EntrezSystem2.PEntrez.Gene.Gene_ResultsPanel.Gene_RVDocSum	C6orf155	C6orf155	544	2.6	0.7	1.3	-0.2	0.0092	0.0014	0.4	-0.3	-0.1	-0.4	-0.2	0.14	0.95	0.97
http://www.ensembl.org/Homo_sapiens/Variation/Summary?v=rs17568315	rs17568315	rs17568315	6	0.97	0.03	0	0	5.2e-05	0.26	0.13	0.04	T	A	0.16	http://www.ncbi.nlm.nih.gov/sites/entrez?Db=gene&Cmd=ShowDetailView&TermToSearch=22999&ordinalpos=1&itool=EntrezSystem2.PEntrez.Gene.Gene_ResultsPanel.Gene_RVDocSum	RIMS1	RIMS1	0	http://www.ncbi.nlm.nih.gov/sites/entrez?Db=gene&Cmd=ShowDetailView&TermToSearch=441160&ordinalpos=1&itool=EntrezSystem2.PEntrez.Gene.Gene_ResultsPanel.Gene_RVDocSum	LOC441160	LOC441160	394	http://www.ncbi.nlm.nih.gov/sites/entrez?Db=gene&Cmd=ShowDetailView&TermToSearch=79940&ordinalpos=1&itool=EntrezSystem2.PEntrez.Gene.Gene_ResultsPanel.Gene_RVDocSum	C6orf155	C6orf155	559	2.5	0.7	1.5	-0.2	0.011	0.00085	0.41	-0.3	0	-0.4	-0.2	0.11	0.8	0.62
http://www.ensembl.org/Homo_sapiens/Variation/Summary?v=rs12528110	rs12528110	rs12528110	6	0.97	0.03	0	0	5.3e-05	0.33	0.13	0.03	C	G	0.16	http://www.ncbi.nlm.nih.gov/sites/entrez?Db=gene&Cmd=ShowDetailView&TermToSearch=22999&ordinalpos=1&itool=EntrezSystem2.PEntrez.Gene.Gene_ResultsPanel.Gene_RVDocSum	RIMS1	RIMS1	0	http://www.ncbi.nlm.nih.gov/sites/entrez?Db=gene&Cmd=ShowDetailView&TermToSearch=441160&ordinalpos=1&itool=EntrezSystem2.PEntrez.Gene.Gene_ResultsPanel.Gene_RVDocSum	LOC441160	LOC441160	398	http://www.ncbi.nlm.nih.gov/sites/entrez?Db=gene&Cmd=ShowDetailView&TermToSearch=79940&ordinalpos=1&itool=EntrezSystem2.PEntrez.Gene.Gene_ResultsPanel.Gene_RVDocSum	C6orf155	C6orf155	563	2.5	0.7	1.5	-0.2	0.012	0.00078	0.42	-0.4	-0.1	-0.4	-0.2	0.15	0.8	0.6
http://www.ensembl.org/Homo_sapiens/Variation/Summary?v=rs17568434	rs17568434	rs17568434	6	0.97	0.03	0	0	5.4e-05	0.32	0.13	0.03	C	T	0.16	http://www.ncbi.nlm.nih.gov/sites/entrez?Db=gene&Cmd=ShowDetailView&TermToSearch=22999&ordinalpos=1&itool=EntrezSystem2.PEntrez.Gene.Gene_ResultsPanel.Gene_RVDocSum	RIMS1	RIMS1	0	http://www.ncbi.nlm.nih.gov/sites/entrez?Db=gene&Cmd=ShowDetailView&TermToSearch=441160&ordinalpos=1&itool=EntrezSystem2.PEntrez.Gene.Gene_ResultsPanel.Gene_RVDocSum	LOC441160	LOC441160	403	http://www.ncbi.nlm.nih.gov/sites/entrez?Db=gene&Cmd=ShowDetailView&TermToSearch=79940&ordinalpos=1&itool=EntrezSystem2.PEntrez.Gene.Gene_ResultsPanel.Gene_RVDocSum	C6orf155	C6orf155	568	2.5	0.7	1.5	-0.2	0.012	0.00078	0.42	-0.4	-0.1	-0.4	-0.2	0.15	0.78	0.59
http://www.ensembl.org/Homo_sapiens/Variation/Summary?v=rs1384390	rs1384390	rs1384390	6	0.97	0.03	0	0	5.2e-05	0.32	0.13	0.03	T	C	0.16	http://www.ncbi.nlm.nih.gov/sites/entrez?Db=gene&Cmd=ShowDetailView&TermToSearch=22999&ordinalpos=1&itool=EntrezSystem2.PEntrez.Gene.Gene_ResultsPanel.Gene_RVDocSum	RIMS1	RIMS1	0	http://www.ncbi.nlm.nih.gov/sites/entrez?Db=gene&Cmd=ShowDetailView&TermToSearch=441160&ordinalpos=1&itool=EntrezSystem2.PEntrez.Gene.Gene_ResultsPanel.Gene_RVDocSum	LOC441160	LOC441160	404	http://www.ncbi.nlm.nih.gov/sites/entrez?Db=gene&Cmd=ShowDetailView&TermToSearch=79940&ordinalpos=1&itool=EntrezSystem2.PEntrez.Gene.Gene_ResultsPanel.Gene_RVDocSum	C6orf155	C6orf155	569	2.5	0.7	1.6	-0.2	0.012	0.00072	0.43	-0.4	-0.1	-0.4	-0.2	0.15	0.77	0.56
http://www.ensembl.org/Homo_sapiens/Variation/Summary?v=rs12524886	rs12524886	rs12524886	6	0.96	0.04	0	0	4.4e-05	0.3	0.13	0.03	A	G	0.15	http://www.ncbi.nlm.nih.gov/sites/entrez?Db=gene&Cmd=ShowDetailView&TermToSearch=22999&ordinalpos=1&itool=EntrezSystem2.PEntrez.Gene.Gene_ResultsPanel.Gene_RVDocSum	RIMS1	RIMS1	0	http://www.ncbi.nlm.nih.gov/sites/entrez?Db=gene&Cmd=ShowDetailView&TermToSearch=441160&ordinalpos=1&itool=EntrezSystem2.PEntrez.Gene.Gene_ResultsPanel.Gene_RVDocSum	LOC441160	LOC441160	410	http://www.ncbi.nlm.nih.gov/sites/entrez?Db=gene&Cmd=ShowDetailView&TermToSearch=79940&ordinalpos=1&itool=EntrezSystem2.PEntrez.Gene.Gene_ResultsPanel.Gene_RVDocSum	C6orf155	C6orf155	575	2.6	0.7	1.6	-0.2	0.011	0.00065	0.44	-0.4	-0.1	-0.4	-0.2	0.14	0.75	0.58
http://www.ensembl.org/Homo_sapiens/Variation/Summary?v=rs2057021	rs2057021	rs2057021	6	0.96	0.04	0	0	4.2e-05	0.29	0.14	0.04	G	A	0.15	http://www.ncbi.nlm.nih.gov/sites/entrez?Db=gene&Cmd=ShowDetailView&TermToSearch=22999&ordinalpos=1&itool=EntrezSystem2.PEntrez.Gene.Gene_ResultsPanel.Gene_RVDocSum	RIMS1	RIMS1	0	http://www.ncbi.nlm.nih.gov/sites/entrez?Db=gene&Cmd=ShowDetailView&TermToSearch=441160&ordinalpos=1&itool=EntrezSystem2.PEntrez.Gene.Gene_ResultsPanel.Gene_RVDocSum	LOC441160	LOC441160	411	http://www.ncbi.nlm.nih.gov/sites/entrez?Db=gene&Cmd=ShowDetailView&TermToSearch=79940&ordinalpos=1&itool=EntrezSystem2.PEntrez.Gene.Gene_ResultsPanel.Gene_RVDocSum	C6orf155	C6orf155	576	2.6	0.7	1.6	-0.2	0.01	0.00066	0.45	-0.3	-0.1	-0.4	-0.2	0.14	0.74	0.59
http://www.ensembl.org/Homo_sapiens/Variation/Summary?v=rs2057022	rs2057022	rs2057022	6	0.96	0.04	0	0	3.6e-05	0.28	0.14	0.04	A	G	0.15	http://www.ncbi.nlm.nih.gov/sites/entrez?Db=gene&Cmd=ShowDetailView&TermToSearch=22999&ordinalpos=1&itool=EntrezSystem2.PEntrez.Gene.Gene_ResultsPanel.Gene_RVDocSum	RIMS1	RIMS1	0	http://www.ncbi.nlm.nih.gov/sites/entrez?Db=gene&Cmd=ShowDetailView&TermToSearch=441160&ordinalpos=1&itool=EntrezSystem2.PEntrez.Gene.Gene_ResultsPanel.Gene_RVDocSum	LOC441160	LOC441160	411	http://www.ncbi.nlm.nih.gov/sites/entrez?Db=gene&Cmd=ShowDetailView&TermToSearch=79940&ordinalpos=1&itool=EntrezSystem2.PEntrez.Gene.Gene_ResultsPanel.Gene_RVDocSum	C6orf155	C6orf155	576	2.7	0.8	1.6	-0.2	0.0092	0.00061	0.45	-0.3	-0.1	-0.4	-0.2	0.13	0.72	0.58
http://www.ensembl.org/Homo_sapiens/Variation/Summary?v=rs9442728	rs9442728	rs9442728	6	0.95	0.05	0	0	3.2e-05	0.29	0.14	0.04	T	C	0.15	http://www.ncbi.nlm.nih.gov/sites/entrez?Db=gene&Cmd=ShowDetailView&TermToSearch=22999&ordinalpos=1&itool=EntrezSystem2.PEntrez.Gene.Gene_ResultsPanel.Gene_RVDocSum	RIMS1	RIMS1	0	http://www.ncbi.nlm.nih.gov/sites/entrez?Db=gene&Cmd=ShowDetailView&TermToSearch=441160&ordinalpos=1&itool=EntrezSystem2.PEntrez.Gene.Gene_ResultsPanel.Gene_RVDocSum	LOC441160	LOC441160	412	http://www.ncbi.nlm.nih.gov/sites/entrez?Db=gene&Cmd=ShowDetailView&TermToSearch=79940&ordinalpos=1&itool=EntrezSystem2.PEntrez.Gene.Gene_ResultsPanel.Gene_RVDocSum	C6orf155	C6orf155	577	2.7	0.8	1.6	-0.2	0.0079	0.00062	0.46	-0.3	-0.1	-0.4	-0.2	0.13	0.78	0.62
http://www.ensembl.org/Homo_sapiens/Variation/Summary?v=rs9446532	rs9446532	rs9446532	6	0.95	0.05	0	0	3e-05	0.3	0.14	0.03	C	G	0.15	http://www.ncbi.nlm.nih.gov/sites/entrez?Db=gene&Cmd=ShowDetailView&TermToSearch=22999&ordinalpos=1&itool=EntrezSystem2.PEntrez.Gene.Gene_ResultsPanel.Gene_RVDocSum	RIMS1	RIMS1	0	http://www.ncbi.nlm.nih.gov/sites/entrez?Db=gene&Cmd=ShowDetailView&TermToSearch=441160&ordinalpos=1&itool=EntrezSystem2.PEntrez.Gene.Gene_ResultsPanel.Gene_RVDocSum	LOC441160	LOC441160	413	http://www.ncbi.nlm.nih.gov/sites/entrez?Db=gene&Cmd=ShowDetailView&TermToSearch=79940&ordinalpos=1&itool=EntrezSystem2.PEntrez.Gene.Gene_ResultsPanel.Gene_RVDocSum	C6orf155	C6orf155	578	2.8	0.8	1.6	-0.2	0.0075	0.00063	0.46	-0.3	-0.1	-0.4	-0.2	0.13	0.8	0.61
http://www.ensembl.org/Homo_sapiens/Variation/Summary?v=rs12524322	rs12524322	rs12524322	6	0.96	0.04	0	0	3.5e-05	0.33	0.14	0.03	A	G	0.16	http://www.ncbi.nlm.nih.gov/sites/entrez?Db=gene&Cmd=ShowDetailView&TermToSearch=22999&ordinalpos=1&itool=EntrezSystem2.PEntrez.Gene.Gene_ResultsPanel.Gene_RVDocSum	RIMS1	RIMS1	0	http://www.ncbi.nlm.nih.gov/sites/entrez?Db=gene&Cmd=ShowDetailView&TermToSearch=441160&ordinalpos=1&itool=EntrezSystem2.PEntrez.Gene.Gene_ResultsPanel.Gene_RVDocSum	LOC441160	LOC441160	415	http://www.ncbi.nlm.nih.gov/sites/entrez?Db=gene&Cmd=ShowDetailView&TermToSearch=79940&ordinalpos=1&itool=EntrezSystem2.PEntrez.Gene.Gene_ResultsPanel.Gene_RVDocSum	C6orf155	C6orf155	580	2.7	0.8	1.6	-0.2	0.0083	0.00073	0.44	-0.4	-0.1	-0.4	-0.2	0.15	0.8	0.61
http://www.ensembl.org/Homo_sapiens/Variation/Summary?v=rs17568677	rs17568677	rs17568677	6	0.95	0.05	0	0	3.2e-05	0.29	0.14	0.04	T	C	0.15	http://www.ncbi.nlm.nih.gov/sites/entrez?Db=gene&Cmd=ShowDetailView&TermToSearch=22999&ordinalpos=1&itool=EntrezSystem2.PEntrez.Gene.Gene_ResultsPanel.Gene_RVDocSum	RIMS1	RIMS1	0	http://www.ncbi.nlm.nih.gov/sites/entrez?Db=gene&Cmd=ShowDetailView&TermToSearch=441160&ordinalpos=1&itool=EntrezSystem2.PEntrez.Gene.Gene_ResultsPanel.Gene_RVDocSum	LOC441160	LOC441160	415	http://www.ncbi.nlm.nih.gov/sites/entrez?Db=gene&Cmd=ShowDetailView&TermToSearch=79940&ordinalpos=1&itool=EntrezSystem2.PEntrez.Gene.Gene_ResultsPanel.Gene_RVDocSum	C6orf155	C6orf155	581	2.7	0.8	1.6	-0.2	0.0075	0.00072	0.45	-0.3	-0.1	-0.4	-0.2	0.13	0.77	0.59
http://www.ensembl.org/Homo_sapiens/Variation/Summary?v=rs10942990	rs10942990	rs10942990	6	0.95	0.04	0	0	3.5e-05	0.28	0.14	0.04	C	T	0.16	http://www.ncbi.nlm.nih.gov/sites/entrez?Db=gene&Cmd=ShowDetailView&TermToSearch=22999&ordinalpos=1&itool=EntrezSystem2.PEntrez.Gene.Gene_ResultsPanel.Gene_RVDocSum	RIMS1	RIMS1	0	http://www.ncbi.nlm.nih.gov/sites/entrez?Db=gene&Cmd=ShowDetailView&TermToSearch=441160&ordinalpos=1&itool=EntrezSystem2.PEntrez.Gene.Gene_ResultsPanel.Gene_RVDocSum	LOC441160	LOC441160	422	http://www.ncbi.nlm.nih.gov/sites/entrez?Db=gene&Cmd=ShowDetailView&TermToSearch=79940&ordinalpos=1&itool=EntrezSystem2.PEntrez.Gene.Gene_ResultsPanel.Gene_RVDocSum	C6orf155	C6orf155	587	2.7	0.8	1.5	-0.2	0.0078	0.00075	0.44	-0.3	-0.1	-0.4	-0.2	0.12	0.77	0.59
http://www.ensembl.org/Homo_sapiens/Variation/Summary?v=rs9446545	rs9446545	rs9446545	6	0.96	0.04	0	0	3.5e-05	0.28	0.14	0.04	T	G	0.16	http://www.ncbi.nlm.nih.gov/sites/entrez?Db=gene&Cmd=ShowDetailView&TermToSearch=22999&ordinalpos=1&itool=EntrezSystem2.PEntrez.Gene.Gene_ResultsPanel.Gene_RVDocSum	RIMS1	RIMS1	0	http://www.ncbi.nlm.nih.gov/sites/entrez?Db=gene&Cmd=ShowDetailView&TermToSearch=441160&ordinalpos=1&itool=EntrezSystem2.PEntrez.Gene.Gene_ResultsPanel.Gene_RVDocSum	LOC441160	LOC441160	429	http://www.ncbi.nlm.nih.gov/sites/entrez?Db=gene&Cmd=ShowDetailView&TermToSearch=643067&ordinalpos=1&itool=EntrezSystem2.PEntrez.Gene.Gene_ResultsPanel.Gene_RVDocSum	LOC643067	LOC643067	584	2.7	0.8	1.5	-0.2	0.0079	0.00075	0.44	-0.3	-0.1	-0.4	-0.2	0.12	0.77	0.59
http://www.ensembl.org/Homo_sapiens/Variation/Summary?v=rs9446546	rs9446546	rs9446546	6	0.96	0.04	0	0	3.5e-05	0.28	0.14	0.04	T	A	0.16	http://www.ncbi.nlm.nih.gov/sites/entrez?Db=gene&Cmd=ShowDetailView&TermToSearch=22999&ordinalpos=1&itool=EntrezSystem2.PEntrez.Gene.Gene_ResultsPanel.Gene_RVDocSum	RIMS1	RIMS1	0	http://www.ncbi.nlm.nih.gov/sites/entrez?Db=gene&Cmd=ShowDetailView&TermToSearch=441160&ordinalpos=1&itool=EntrezSystem2.PEntrez.Gene.Gene_ResultsPanel.Gene_RVDocSum	LOC441160	LOC441160	429	http://www.ncbi.nlm.nih.gov/sites/entrez?Db=gene&Cmd=ShowDetailView&TermToSearch=643067&ordinalpos=1&itool=EntrezSystem2.PEntrez.Gene.Gene_ResultsPanel.Gene_RVDocSum	LOC643067	LOC643067	583	2.7	0.8	1.5	-0.2	0.0079	0.00075	0.45	-0.3	-0.1	-0.4	-0.2	0.12	0.77	0.59
http://www.ensembl.org/Homo_sapiens/Variation/Summary?v=rs17568838	rs17568838	rs17568838	6	0.95	0.04	0	0	3.3e-05	0.29	0.14	0.04	T	A	0.15	http://www.ncbi.nlm.nih.gov/sites/entrez?Db=gene&Cmd=ShowDetailView&TermToSearch=22999&ordinalpos=1&itool=EntrezSystem2.PEntrez.Gene.Gene_ResultsPanel.Gene_RVDocSum	RIMS1	RIMS1	0	http://www.ncbi.nlm.nih.gov/sites/entrez?Db=gene&Cmd=ShowDetailView&TermToSearch=441160&ordinalpos=1&itool=EntrezSystem2.PEntrez.Gene.Gene_ResultsPanel.Gene_RVDocSum	LOC441160	LOC441160	435	http://www.ncbi.nlm.nih.gov/sites/entrez?Db=gene&Cmd=ShowDetailView&TermToSearch=643067&ordinalpos=1&itool=EntrezSystem2.PEntrez.Gene.Gene_ResultsPanel.Gene_RVDocSum	LOC643067	LOC643067	577	2.7	0.8	1.5	-0.2	0.0074	0.00081	0.45	-0.3	0	-0.4	-0.2	0.11	0.79	0.59
http://www.ensembl.org/Homo_sapiens/Variation/Summary?v=rs7761468	rs7761468	rs7761468	6	0.95	0.04	0	0	3.4e-05	0.27	0.14	0.04	C	T	0.15	http://www.ncbi.nlm.nih.gov/sites/entrez?Db=gene&Cmd=ShowDetailView&TermToSearch=22999&ordinalpos=1&itool=EntrezSystem2.PEntrez.Gene.Gene_ResultsPanel.Gene_RVDocSum	RIMS1	RIMS1	0	http://www.ncbi.nlm.nih.gov/sites/entrez?Db=gene&Cmd=ShowDetailView&TermToSearch=441160&ordinalpos=1&itool=EntrezSystem2.PEntrez.Gene.Gene_ResultsPanel.Gene_RVDocSum	LOC441160	LOC441160	438	http://www.ncbi.nlm.nih.gov/sites/entrez?Db=gene&Cmd=ShowDetailView&TermToSearch=643067&ordinalpos=1&itool=EntrezSystem2.PEntrez.Gene.Gene_ResultsPanel.Gene_RVDocSum	LOC643067	LOC643067	574	2.7	0.8	1.5	-0.2	0.0072	0.0009	0.44	-0.3	0	-0.4	-0.2	0.11	0.76	0.6
http://www.ensembl.org/Homo_sapiens/Variation/Summary?v=rs9446549	rs9446549	rs9446549	6	0.95	0.05	0	0	3.2e-05	0.28	0.14	0.04	G	A	0.15	http://www.ncbi.nlm.nih.gov/sites/entrez?Db=gene&Cmd=ShowDetailView&TermToSearch=22999&ordinalpos=1&itool=EntrezSystem2.PEntrez.Gene.Gene_ResultsPanel.Gene_RVDocSum	RIMS1	RIMS1	0	http://www.ncbi.nlm.nih.gov/sites/entrez?Db=gene&Cmd=ShowDetailView&TermToSearch=441160&ordinalpos=1&itool=EntrezSystem2.PEntrez.Gene.Gene_ResultsPanel.Gene_RVDocSum	LOC441160	LOC441160	441	http://www.ncbi.nlm.nih.gov/sites/entrez?Db=gene&Cmd=ShowDetailView&TermToSearch=643067&ordinalpos=1&itool=EntrezSystem2.PEntrez.Gene.Gene_ResultsPanel.Gene_RVDocSum	LOC643067	LOC643067	572	2.7	0.8	1.5	-0.2	0.0072	0.00081	0.45	-0.3	0	-0.4	-0.2	0.11	0.79	0.59
http://www.ensembl.org/Homo_sapiens/Variation/Summary?v=rs17569061	rs17569061	rs17569061	6	0.96	0.04	0	0	3.5e-05	0.29	0.14	0.04	A	G	0.15	http://www.ncbi.nlm.nih.gov/sites/entrez?Db=gene&Cmd=ShowDetailView&TermToSearch=22999&ordinalpos=1&itool=EntrezSystem2.PEntrez.Gene.Gene_ResultsPanel.Gene_RVDocSum	RIMS1	RIMS1	0	http://www.ncbi.nlm.nih.gov/sites/entrez?Db=gene&Cmd=ShowDetailView&TermToSearch=441160&ordinalpos=1&itool=EntrezSystem2.PEntrez.Gene.Gene_ResultsPanel.Gene_RVDocSum	LOC441160	LOC441160	445	http://www.ncbi.nlm.nih.gov/sites/entrez?Db=gene&Cmd=ShowDetailView&TermToSearch=643067&ordinalpos=1&itool=EntrezSystem2.PEntrez.Gene.Gene_ResultsPanel.Gene_RVDocSum	LOC643067	LOC643067	568	2.7	0.8	1.5	-0.2	0.0079	0.00079	0.45	-0.3	0	-0.4	-0.2	0.11	0.79	0.59
http://www.ensembl.org/Homo_sapiens/Variation/Summary?v=rs17569172	rs17569172	rs17569172	6	0.96	0.04	0	0	3.7e-05	0.28	0.14	0.04	T	A	0.15	http://www.ncbi.nlm.nih.gov/sites/entrez?Db=gene&Cmd=ShowDetailView&TermToSearch=22999&ordinalpos=1&itool=EntrezSystem2.PEntrez.Gene.Gene_ResultsPanel.Gene_RVDocSum	RIMS1	RIMS1	0	http://www.ncbi.nlm.nih.gov/sites/entrez?Db=gene&Cmd=ShowDetailView&TermToSearch=441160&ordinalpos=1&itool=EntrezSystem2.PEntrez.Gene.Gene_ResultsPanel.Gene_RVDocSum	LOC441160	LOC441160	446	http://www.ncbi.nlm.nih.gov/sites/entrez?Db=gene&Cmd=ShowDetailView&TermToSearch=643067&ordinalpos=1&itool=EntrezSystem2.PEntrez.Gene.Gene_ResultsPanel.Gene_RVDocSum	LOC643067	LOC643067	566	2.7	0.8	1.5	-0.2	0.0081	0.00078	0.46	-0.3	0	-0.4	-0.2	0.1	0.78	0.58
http://www.ensembl.org/Homo_sapiens/Variation/Summary?v=rs6926634	rs6926634	rs6926634	6	0.96	0.04	0	0	3.5e-05	0.29	0.14	0.04	A	G	0.15	http://www.ncbi.nlm.nih.gov/sites/entrez?Db=gene&Cmd=ShowDetailView&TermToSearch=22999&ordinalpos=1&itool=EntrezSystem2.PEntrez.Gene.Gene_ResultsPanel.Gene_RVDocSum	RIMS1	RIMS1	0	http://www.ncbi.nlm.nih.gov/sites/entrez?Db=gene&Cmd=ShowDetailView&TermToSearch=441160&ordinalpos=1&itool=EntrezSystem2.PEntrez.Gene.Gene_ResultsPanel.Gene_RVDocSum	LOC441160	LOC441160	448	http://www.ncbi.nlm.nih.gov/sites/entrez?Db=gene&Cmd=ShowDetailView&TermToSearch=643067&ordinalpos=1&itool=EntrezSystem2.PEntrez.Gene.Gene_ResultsPanel.Gene_RVDocSum	LOC643067	LOC643067	564	2.7	0.8	1.5	-0.2	0.0081	0.00076	0.45	-0.3	0	-0.4	-0.2	0.1	0.81	0.59
http://www.ensembl.org/Homo_sapiens/Variation/Summary?v=rs12529960	rs12529960	rs12529960	6	0.95	0.04	0	0	3.3e-05	0.28	0.14	0.04	T	A	0.15	http://www.ncbi.nlm.nih.gov/sites/entrez?Db=gene&Cmd=ShowDetailView&TermToSearch=22999&ordinalpos=1&itool=EntrezSystem2.PEntrez.Gene.Gene_ResultsPanel.Gene_RVDocSum	RIMS1	RIMS1	0	http://www.ncbi.nlm.nih.gov/sites/entrez?Db=gene&Cmd=ShowDetailView&TermToSearch=441160&ordinalpos=1&itool=EntrezSystem2.PEntrez.Gene.Gene_ResultsPanel.Gene_RVDocSum	LOC441160	LOC441160	455	http://www.ncbi.nlm.nih.gov/sites/entrez?Db=gene&Cmd=ShowDetailView&TermToSearch=643067&ordinalpos=1&itool=EntrezSystem2.PEntrez.Gene.Gene_ResultsPanel.Gene_RVDocSum	LOC643067	LOC643067	558	2.7	0.8	1.6	-0.2	0.0075	0.00073	0.48	-0.3	0	-0.4	-0.2	0.095	0.82	0.59
http://www.ensembl.org/Homo_sapiens/Variation/Summary?v=rs12526614	rs12526614	rs12526614	6	0.95	0.04	0	0	3.4e-05	0.29	0.14	0.04	G	C	0.15	http://www.ncbi.nlm.nih.gov/sites/entrez?Db=gene&Cmd=ShowDetailView&TermToSearch=22999&ordinalpos=1&itool=EntrezSystem2.PEntrez.Gene.Gene_ResultsPanel.Gene_RVDocSum	RIMS1	RIMS1	0	http://www.ncbi.nlm.nih.gov/sites/entrez?Db=gene&Cmd=ShowDetailView&TermToSearch=441160&ordinalpos=1&itool=EntrezSystem2.PEntrez.Gene.Gene_ResultsPanel.Gene_RVDocSum	LOC441160	LOC441160	455	http://www.ncbi.nlm.nih.gov/sites/entrez?Db=gene&Cmd=ShowDetailView&TermToSearch=643067&ordinalpos=1&itool=EntrezSystem2.PEntrez.Gene.Gene_ResultsPanel.Gene_RVDocSum	LOC643067	LOC643067	558	2.7	0.8	1.6	-0.2	0.0077	0.00073	0.48	-0.3	0	-0.4	-0.2	0.095	0.82	0.59
http://www.ensembl.org/Homo_sapiens/Variation/Summary?v=rs17569339	rs17569339	rs17569339	6	0.96	0.04	0	0	3.5e-05	0.29	0.14	0.04	G	A	0.14	http://www.ncbi.nlm.nih.gov/sites/entrez?Db=gene&Cmd=ShowDetailView&TermToSearch=22999&ordinalpos=1&itool=EntrezSystem2.PEntrez.Gene.Gene_ResultsPanel.Gene_RVDocSum	RIMS1	RIMS1	0	http://www.ncbi.nlm.nih.gov/sites/entrez?Db=gene&Cmd=ShowDetailView&TermToSearch=441160&ordinalpos=1&itool=EntrezSystem2.PEntrez.Gene.Gene_ResultsPanel.Gene_RVDocSum	LOC441160	LOC441160	457	http://www.ncbi.nlm.nih.gov/sites/entrez?Db=gene&Cmd=ShowDetailView&TermToSearch=643067&ordinalpos=1&itool=EntrezSystem2.PEntrez.Gene.Gene_ResultsPanel.Gene_RVDocSum	LOC643067	LOC643067	556	2.7	0.8	1.6	-0.2	0.0077	0.00074	0.48	-0.3	0	-0.4	-0.2	0.094	0.8	0.58
http://www.ensembl.org/Homo_sapiens/Variation/Summary?v=rs12530391	rs12530391	rs12530391	6	0.96	0.04	0	0	3.6e-05	0.29	0.14	0.04	C	T	0.14	http://www.ncbi.nlm.nih.gov/sites/entrez?Db=gene&Cmd=ShowDetailView&TermToSearch=22999&ordinalpos=1&itool=EntrezSystem2.PEntrez.Gene.Gene_ResultsPanel.Gene_RVDocSum	RIMS1	RIMS1	0	http://www.ncbi.nlm.nih.gov/sites/entrez?Db=gene&Cmd=ShowDetailView&TermToSearch=441160&ordinalpos=1&itool=EntrezSystem2.PEntrez.Gene.Gene_ResultsPanel.Gene_RVDocSum	LOC441160	LOC441160	459	http://www.ncbi.nlm.nih.gov/sites/entrez?Db=gene&Cmd=ShowDetailView&TermToSearch=643067&ordinalpos=1&itool=EntrezSystem2.PEntrez.Gene.Gene_ResultsPanel.Gene_RVDocSum	LOC643067	LOC643067	553	2.7	0.8	1.5	-0.2	0.0077	0.00077	0.48	-0.3	0	-0.4	-0.2	0.095	0.79	0.57
http://www.ensembl.org/Homo_sapiens/Variation/Summary?v=rs17491332	rs17491332	rs17491332	6	0.96	0.04	0	0	4e-05	0.27	0.15	0.04	C	T	0.14	http://www.ncbi.nlm.nih.gov/sites/entrez?Db=gene&Cmd=ShowDetailView&TermToSearch=22999&ordinalpos=1&itool=EntrezSystem2.PEntrez.Gene.Gene_ResultsPanel.Gene_RVDocSum	RIMS1	RIMS1	0	http://www.ncbi.nlm.nih.gov/sites/entrez?Db=gene&Cmd=ShowDetailView&TermToSearch=441160&ordinalpos=1&itool=EntrezSystem2.PEntrez.Gene.Gene_ResultsPanel.Gene_RVDocSum	LOC441160	LOC441160	461	http://www.ncbi.nlm.nih.gov/sites/entrez?Db=gene&Cmd=ShowDetailView&TermToSearch=643067&ordinalpos=1&itool=EntrezSystem2.PEntrez.Gene.Gene_ResultsPanel.Gene_RVDocSum	LOC643067	LOC643067	551	2.6	0.8	1.5	-0.2	0.0088	0.00073	0.49	-0.3	0.1	-0.3	-0.2	0.084	0.81	0.56
http://www.ensembl.org/Homo_sapiens/Variation/Summary?v=rs11754917	rs11754917	rs11754917	6	0.97	0.03	0	0	6.2e-05	0.21	0.13	0.04	G	A	0.16	http://www.ncbi.nlm.nih.gov/sites/entrez?Db=gene&Cmd=ShowDetailView&TermToSearch=22999&ordinalpos=1&itool=EntrezSystem2.PEntrez.Gene.Gene_ResultsPanel.Gene_RVDocSum	RIMS1	RIMS1	0	http://www.ncbi.nlm.nih.gov/sites/entrez?Db=gene&Cmd=ShowDetailView&TermToSearch=441160&ordinalpos=1&itool=EntrezSystem2.PEntrez.Gene.Gene_ResultsPanel.Gene_RVDocSum	LOC441160	LOC441160	462	http://www.ncbi.nlm.nih.gov/sites/entrez?Db=gene&Cmd=ShowDetailView&TermToSearch=643067&ordinalpos=1&itool=EntrezSystem2.PEntrez.Gene.Gene_ResultsPanel.Gene_RVDocSum	LOC643067	LOC643067	551	2.5	0.8	1.4	-0.2	0.0089	0.0012	0.49	-0.3	0.1	-0.4	-0.2	0.071	0.8	0.56
http://www.ensembl.org/Homo_sapiens/Variation/Summary?v=rs17569784	rs17569784	rs17569784	6	0.96	0.04	0	0	3.7e-05	0.26	0.14	0.04	C	T	0.15	http://www.ncbi.nlm.nih.gov/sites/entrez?Db=gene&Cmd=ShowDetailView&TermToSearch=22999&ordinalpos=1&itool=EntrezSystem2.PEntrez.Gene.Gene_ResultsPanel.Gene_RVDocSum	RIMS1	RIMS1	0	http://www.ncbi.nlm.nih.gov/sites/entrez?Db=gene&Cmd=ShowDetailView&TermToSearch=441160&ordinalpos=1&itool=EntrezSystem2.PEntrez.Gene.Gene_ResultsPanel.Gene_RVDocSum	LOC441160	LOC441160	474	http://www.ncbi.nlm.nih.gov/sites/entrez?Db=gene&Cmd=ShowDetailView&TermToSearch=643067&ordinalpos=1&itool=EntrezSystem2.PEntrez.Gene.Gene_ResultsPanel.Gene_RVDocSum	LOC643067	LOC643067	539	2.7	0.9	1.5	-0.2	0.0067	0.00089	0.5	-0.3	0.1	-0.4	-0.2	0.084	0.84	0.58
http://www.ensembl.org/Homo_sapiens/Variation/Summary?v=rs12528112	rs12528112	rs12528112	6	0.98	0.02	0	0	0.00011	0.24	0.13	0.04	G	A	0.16	http://www.ncbi.nlm.nih.gov/sites/entrez?Db=gene&Cmd=ShowDetailView&TermToSearch=22999&ordinalpos=1&itool=EntrezSystem2.PEntrez.Gene.Gene_ResultsPanel.Gene_RVDocSum	RIMS1	RIMS1	0	http://www.ncbi.nlm.nih.gov/sites/entrez?Db=gene&Cmd=ShowDetailView&TermToSearch=441160&ordinalpos=1&itool=EntrezSystem2.PEntrez.Gene.Gene_ResultsPanel.Gene_RVDocSum	LOC441160	LOC441160	486	http://www.ncbi.nlm.nih.gov/sites/entrez?Db=gene&Cmd=ShowDetailView&TermToSearch=643067&ordinalpos=1&itool=EntrezSystem2.PEntrez.Gene.Gene_ResultsPanel.Gene_RVDocSum	LOC643067	LOC643067	526	2.3	0.6	1.3	-0.2	0.018	0.0015	0.4	-0.3	0.1	-0.4	-0.2	0.086	0.65	0.51
http://www.ensembl.org/Homo_sapiens/Variation/Summary?v=rs17780746	rs17780746	rs17780746	6	0.99	0.01	0	0	0.00016	0.26	0.14	0.04	A	G	0.16	http://www.ncbi.nlm.nih.gov/sites/entrez?Db=gene&Cmd=ShowDetailView&TermToSearch=22999&ordinalpos=1&itool=EntrezSystem2.PEntrez.Gene.Gene_ResultsPanel.Gene_RVDocSum	RIMS1	RIMS1	0	http://www.ncbi.nlm.nih.gov/sites/entrez?Db=gene&Cmd=ShowDetailView&TermToSearch=441160&ordinalpos=1&itool=EntrezSystem2.PEntrez.Gene.Gene_ResultsPanel.Gene_RVDocSum	LOC441160	LOC441160	492	http://www.ncbi.nlm.nih.gov/sites/entrez?Db=gene&Cmd=ShowDetailView&TermToSearch=643067&ordinalpos=1&itool=EntrezSystem2.PEntrez.Gene.Gene_ResultsPanel.Gene_RVDocSum	LOC643067	LOC643067	521	2.1	0.4	1.2	-0.1	0.026	0.0021	0.33	-0.3	0.1	-0.3	-0.2	0.087	0.64	0.47
http://www.ensembl.org/Homo_sapiens/Variation/Summary?v=rs11758304	rs11758304	rs11758304	6	0.99	0.01	0	0	0.0002	0.18	0.13	0.05	C	A	0.15	http://www.ncbi.nlm.nih.gov/sites/entrez?Db=gene&Cmd=ShowDetailView&TermToSearch=22999&ordinalpos=1&itool=EntrezSystem2.PEntrez.Gene.Gene_ResultsPanel.Gene_RVDocSum	RIMS1	RIMS1	0	http://www.ncbi.nlm.nih.gov/sites/entrez?Db=gene&Cmd=ShowDetailView&TermToSearch=643067&ordinalpos=1&itool=EntrezSystem2.PEntrez.Gene.Gene_ResultsPanel.Gene_RVDocSum	LOC643067	LOC643067	495	http://www.ncbi.nlm.nih.gov/sites/entrez?Db=gene&Cmd=ShowDetailView&TermToSearch=441160&ordinalpos=1&itool=EntrezSystem2.PEntrez.Gene.Gene_ResultsPanel.Gene_RVDocSum	LOC441160	LOC441160	518	2	0.5	1.1	-0.1	0.026	0.0028	0.34	-0.2	0.1	-0.3	-0.2	0.074	0.53	0.56
http://www.ensembl.org/Homo_sapiens/Variation/Summary?v=rs17725217	rs17725217	rs17725217	6	0.99	0.01	0	0	0.00018	0.18	0.13	0.05	A	G	0.15	http://www.ncbi.nlm.nih.gov/sites/entrez?Db=gene&Cmd=ShowDetailView&TermToSearch=22999&ordinalpos=1&itool=EntrezSystem2.PEntrez.Gene.Gene_ResultsPanel.Gene_RVDocSum	RIMS1	RIMS1	0	http://www.ncbi.nlm.nih.gov/sites/entrez?Db=gene&Cmd=ShowDetailView&TermToSearch=643067&ordinalpos=1&itool=EntrezSystem2.PEntrez.Gene.Gene_ResultsPanel.Gene_RVDocSum	LOC643067	LOC643067	456	http://www.ncbi.nlm.nih.gov/sites/entrez?Db=gene&Cmd=ShowDetailView&TermToSearch=56479&ordinalpos=1&itool=EntrezSystem2.PEntrez.Gene.Gene_ResultsPanel.Gene_RVDocSum	KCNQ5	KCNQ5	480	2.1	0.5	1.1	-0.1	0.026	0.003	0.24	-0.2	0	-0.3	-0.2	0.088	0.57	0.55
http://www.ensembl.org/Homo_sapiens/Variation/Summary?v=rs11756194	rs11756194	rs11756194	6	0.99	0.01	0	0	0.00018	0.18	0.13	0.05	T	C	0.15	http://www.ncbi.nlm.nih.gov/sites/entrez?Db=gene&Cmd=ShowDetailView&TermToSearch=22999&ordinalpos=1&itool=EntrezSystem2.PEntrez.Gene.Gene_ResultsPanel.Gene_RVDocSum	RIMS1	RIMS1	0	http://www.ncbi.nlm.nih.gov/sites/entrez?Db=gene&Cmd=ShowDetailView&TermToSearch=643067&ordinalpos=1&itool=EntrezSystem2.PEntrez.Gene.Gene_ResultsPanel.Gene_RVDocSum	LOC643067	LOC643067	431	http://www.ncbi.nlm.nih.gov/sites/entrez?Db=gene&Cmd=ShowDetailView&TermToSearch=56479&ordinalpos=1&itool=EntrezSystem2.PEntrez.Gene.Gene_ResultsPanel.Gene_RVDocSum	KCNQ5	KCNQ5	455	2.1	0.5	1.1	-0.1	0.023	0.0031	0.27	-0.2	0.1	-0.3	-0.2	0.085	0.63	0.59
http://www.ensembl.org/Homo_sapiens/Variation/Summary?v=rs7748040	rs7748040	rs7748040	6	0.99	0.01	0	0	0.00016	0.12	0.23	0.09	G	A	0.08	http://www.ncbi.nlm.nih.gov/sites/entrez?Db=gene&Cmd=ShowDetailView&TermToSearch=56479&ordinalpos=1&itool=EntrezSystem2.PEntrez.Gene.Gene_ResultsPanel.Gene_RVDocSum	KCNQ5	KCNQ5	0	http://www.ncbi.nlm.nih.gov/sites/entrez?Db=gene&Cmd=ShowDetailView&TermToSearch=80759&ordinalpos=1&itool=EntrezSystem2.PEntrez.Gene.Gene_ResultsPanel.Gene_RVDocSum	C6orf148	C6orf148	49	http://www.ncbi.nlm.nih.gov/sites/entrez?Db=gene&Cmd=ShowDetailView&TermToSearch=653194&ordinalpos=1&itool=EntrezSystem2.PEntrez.Gene.Gene_ResultsPanel.Gene_RVDocSum	LOC653194	LOC653194	50	2	0.3	1.1	0	0.041	0.0018	0.27	0	-0.2	-0.1	0	0.52	0.35	0.19
http://www.ensembl.org/Homo_sapiens/Variation/Summary?v=rs7748411	rs7748411	rs7748411	6	0.99	0.01	0	0	0.00016	0.12	0.23	0.09	G	A	0.08	http://www.ncbi.nlm.nih.gov/sites/entrez?Db=gene&Cmd=ShowDetailView&TermToSearch=56479&ordinalpos=1&itool=EntrezSystem2.PEntrez.Gene.Gene_ResultsPanel.Gene_RVDocSum	KCNQ5	KCNQ5	0	http://www.ncbi.nlm.nih.gov/sites/entrez?Db=gene&Cmd=ShowDetailView&TermToSearch=80759&ordinalpos=1&itool=EntrezSystem2.PEntrez.Gene.Gene_ResultsPanel.Gene_RVDocSum	C6orf148	C6orf148	49	http://www.ncbi.nlm.nih.gov/sites/entrez?Db=gene&Cmd=ShowDetailView&TermToSearch=653194&ordinalpos=1&itool=EntrezSystem2.PEntrez.Gene.Gene_ResultsPanel.Gene_RVDocSum	LOC653194	LOC653194	49	2	0.3	1.1	0	0.041	0.0018	0.27	0	-0.2	-0.1	0	0.51	0.35	0.19
http://www.ensembl.org/Homo_sapiens/Variation/Summary?v=rs10498891	rs10498891	rs10498891	6	0.95	0.05	0	0	3e-05	0.11	0.18	0.07	C	T	0.07	http://www.ncbi.nlm.nih.gov/sites/entrez?Db=gene&Cmd=ShowDetailView&TermToSearch=56479&ordinalpos=1&itool=EntrezSystem2.PEntrez.Gene.Gene_ResultsPanel.Gene_RVDocSum	KCNQ5	KCNQ5	0	http://www.ncbi.nlm.nih.gov/sites/entrez?Db=gene&Cmd=ShowDetailView&TermToSearch=80759&ordinalpos=1&itool=EntrezSystem2.PEntrez.Gene.Gene_ResultsPanel.Gene_RVDocSum	C6orf148	C6orf148	27	http://www.ncbi.nlm.nih.gov/sites/entrez?Db=gene&Cmd=ShowDetailView&TermToSearch=653194&ordinalpos=1&itool=EntrezSystem2.PEntrez.Gene.Gene_ResultsPanel.Gene_RVDocSum	LOC653194	LOC653194	27	2.7	0.3	1.7	0	0.039	0.00036	0.16	0	-0.2	-0.2	-0.1	0.34	0.33	0.39
http://www.ensembl.org/Homo_sapiens/Variation/Summary?v=rs9688431	rs9688431	rs9688431	6	0.95	0.04	0	0	3e-05	0.14	0.22	0.08	C	T	0.08	http://www.ncbi.nlm.nih.gov/sites/entrez?Db=gene&Cmd=ShowDetailView&TermToSearch=80759&ordinalpos=1&itool=EntrezSystem2.PEntrez.Gene.Gene_ResultsPanel.Gene_RVDocSum	C6orf148	C6orf148	0	http://www.ncbi.nlm.nih.gov/sites/entrez?Db=gene&Cmd=ShowDetailView&TermToSearch=653194&ordinalpos=1&itool=EntrezSystem2.PEntrez.Gene.Gene_ResultsPanel.Gene_RVDocSum	LOC653194	LOC653194	3	http://www.ncbi.nlm.nih.gov/sites/entrez?Db=gene&Cmd=ShowDetailView&TermToSearch=56479&ordinalpos=1&itool=EntrezSystem2.PEntrez.Gene.Gene_ResultsPanel.Gene_RVDocSum	KCNQ5	KCNQ5	17	2.7	0.8	1.1	0	0.0093	0.002	0.19	0	-0.2	-0.2	0.2	0.43	0.79	0.078
http://www.ensembl.org/Homo_sapiens/Variation/Summary?v=rs2282448	rs2282448	rs2282448	6	0.96	0.04	0	0	3.5e-05	0.15	0.22	0.08	G	T	0.07	http://www.ncbi.nlm.nih.gov/sites/entrez?Db=gene&Cmd=ShowDetailView&TermToSearch=80759&ordinalpos=1&itool=EntrezSystem2.PEntrez.Gene.Gene_ResultsPanel.Gene_RVDocSum	C6orf148	C6orf148	0	http://www.ncbi.nlm.nih.gov/sites/entrez?Db=gene&Cmd=ShowDetailView&TermToSearch=653194&ordinalpos=1&itool=EntrezSystem2.PEntrez.Gene.Gene_ResultsPanel.Gene_RVDocSum	LOC653194	LOC653194	14	http://www.ncbi.nlm.nih.gov/sites/entrez?Db=gene&Cmd=ShowDetailView&TermToSearch=56479&ordinalpos=1&itool=EntrezSystem2.PEntrez.Gene.Gene_ResultsPanel.Gene_RVDocSum	KCNQ5	KCNQ5	28	2.7	0.6	1.5	-0.1	0.018	0.00058	0.28	-0.1	-0.3	-0.2	0.2	0.83	0.5	0.058
http://www.ensembl.org/Homo_sapiens/Variation/Summary?v=rs2350753	rs2350753	rs2350753	6	0.96	0.03	0	0	4.4e-05	0.18	0.2	0.07	T	C	0.08	http://www.ncbi.nlm.nih.gov/sites/entrez?Db=gene&Cmd=ShowDetailView&TermToSearch=80759&ordinalpos=1&itool=EntrezSystem2.PEntrez.Gene.Gene_ResultsPanel.Gene_RVDocSum	C6orf148	C6orf148	0	http://www.ncbi.nlm.nih.gov/sites/entrez?Db=gene&Cmd=ShowDetailView&TermToSearch=653194&ordinalpos=1&itool=EntrezSystem2.PEntrez.Gene.Gene_ResultsPanel.Gene_RVDocSum	LOC653194	LOC653194	28	http://www.ncbi.nlm.nih.gov/sites/entrez?Db=gene&Cmd=ShowDetailView&TermToSearch=56479&ordinalpos=1&itool=EntrezSystem2.PEntrez.Gene.Gene_ResultsPanel.Gene_RVDocSum	KCNQ5	KCNQ5	43	2.6	0.6	1.4	-0.1	0.018	0.00086	0.27	-0.1	-0.3	-0.2	0.2	0.98	0.48	0.073
http://www.ensembl.org/Homo_sapiens/Variation/Summary?v=rs9384983	rs9384983	rs9384983	6	0.99	0.01	0	0	0.00015	0.87	0.11	0	A	G	0.22	http://www.ncbi.nlm.nih.gov/sites/entrez?Db=gene&Cmd=ShowDetailView&TermToSearch=221302&ordinalpos=1&itool=EntrezSystem2.PEntrez.Gene.Gene_ResultsPanel.Gene_RVDocSum	C6orf113	C6orf113	0	http://www.ncbi.nlm.nih.gov/sites/entrez?Db=gene&Cmd=ShowDetailView&TermToSearch=345895&ordinalpos=1&itool=EntrezSystem2.PEntrez.Gene.Gene_ResultsPanel.Gene_RVDocSum	RSHL3	RSHL3	5	http://www.ncbi.nlm.nih.gov/sites/entrez?Db=gene&Cmd=ShowDetailView&TermToSearch=3841&ordinalpos=1&itool=EntrezSystem2.PEntrez.Gene.Gene_ResultsPanel.Gene_RVDocSum	KPNA5	KPNA5	44	2.2	0.5	1.2	-0.1	0.019	0.0029	0.32	-0.7	-0.5	-0.2	0	0.87	0.28	0.13
http://www.ensembl.org/Homo_sapiens/Variation/Summary?v=rs6905711	rs6905711	rs6905711	6	0.99	0.01	0	0	0.00019	0.9	0.11	0	A	T	0.22	http://www.ncbi.nlm.nih.gov/sites/entrez?Db=gene&Cmd=ShowDetailView&TermToSearch=221302&ordinalpos=1&itool=EntrezSystem2.PEntrez.Gene.Gene_ResultsPanel.Gene_RVDocSum	C6orf113	C6orf113	0	http://www.ncbi.nlm.nih.gov/sites/entrez?Db=gene&Cmd=ShowDetailView&TermToSearch=345895&ordinalpos=1&itool=EntrezSystem2.PEntrez.Gene.Gene_ResultsPanel.Gene_RVDocSum	RSHL3	RSHL3	16	http://www.ncbi.nlm.nih.gov/sites/entrez?Db=gene&Cmd=ShowDetailView&TermToSearch=3841&ordinalpos=1&itool=EntrezSystem2.PEntrez.Gene.Gene_ResultsPanel.Gene_RVDocSum	KPNA5	KPNA5	32	2.1	0.5	1.1	-0.1	0.019	0.0037	0.33	-0.6	-0.5	-0.3	0	0.89	0.31	0.14
http://www.ensembl.org/Homo_sapiens/Variation/Summary?v=rs6568960	rs6568960	rs6568960	6	0.99	0.01	0	0	0.00013	0.36	0.1	-0.02	G	A	0.31	http://www.ncbi.nlm.nih.gov/sites/entrez?Db=gene&Cmd=ShowDetailView&TermToSearch=221302&ordinalpos=1&itool=EntrezSystem2.PEntrez.Gene.Gene_ResultsPanel.Gene_RVDocSum	C6orf113	C6orf113	1	http://www.ncbi.nlm.nih.gov/sites/entrez?Db=gene&Cmd=ShowDetailView&TermToSearch=3841&ordinalpos=1&itool=EntrezSystem2.PEntrez.Gene.Gene_ResultsPanel.Gene_RVDocSum	KPNA5	KPNA5	12	http://www.ncbi.nlm.nih.gov/sites/entrez?Db=gene&Cmd=ShowDetailView&TermToSearch=345895&ordinalpos=1&itool=EntrezSystem2.PEntrez.Gene.Gene_ResultsPanel.Gene_RVDocSum	RSHL3	RSHL3	36	2.2	0.7	1.1	-0.2	0.012	0.0031	0.4	-0.6	-0.4	-0.4	-0.2	0.26	0.56	0.28
http://www.ensembl.org/Homo_sapiens/Variation/Summary?v=rs1165373	rs1165373	rs1165373	6	0.99	0.01	0	0	0.00012	0.45	0.11	-0.02	A	G	0.27	http://www.ncbi.nlm.nih.gov/sites/entrez?Db=gene&Cmd=ShowDetailView&TermToSearch=3841&ordinalpos=1&itool=EntrezSystem2.PEntrez.Gene.Gene_ResultsPanel.Gene_RVDocSum	KPNA5	KPNA5	5	http://www.ncbi.nlm.nih.gov/sites/entrez?Db=gene&Cmd=ShowDetailView&TermToSearch=221302&ordinalpos=1&itool=EntrezSystem2.PEntrez.Gene.Gene_ResultsPanel.Gene_RVDocSum	C6orf113	C6orf113	7	http://www.ncbi.nlm.nih.gov/sites/entrez?Db=gene&Cmd=ShowDetailView&TermToSearch=345895&ordinalpos=1&itool=EntrezSystem2.PEntrez.Gene.Gene_ResultsPanel.Gene_RVDocSum	RSHL3	RSHL3	43	2.2	0.9	0.9	-0.2	0.006	0.0048	0.52	-0.6	-0.4	-0.3	-0.1	0.33	0.43	0.22
http://www.ensembl.org/Homo_sapiens/Variation/Summary?v=rs1165374	rs1165374	rs1165374	6	0.98	0.01	0	0	0.00012	0.45	0.11	-0.02	G	C	0.27	http://www.ncbi.nlm.nih.gov/sites/entrez?Db=gene&Cmd=ShowDetailView&TermToSearch=3841&ordinalpos=1&itool=EntrezSystem2.PEntrez.Gene.Gene_ResultsPanel.Gene_RVDocSum	KPNA5	KPNA5	2	http://www.ncbi.nlm.nih.gov/sites/entrez?Db=gene&Cmd=ShowDetailView&TermToSearch=221302&ordinalpos=1&itool=EntrezSystem2.PEntrez.Gene.Gene_ResultsPanel.Gene_RVDocSum	C6orf113	C6orf113	10	http://www.ncbi.nlm.nih.gov/sites/entrez?Db=gene&Cmd=ShowDetailView&TermToSearch=345895&ordinalpos=1&itool=EntrezSystem2.PEntrez.Gene.Gene_ResultsPanel.Gene_RVDocSum	RSHL3	RSHL3	46	2.2	0.9	0.9	-0.2	0.0058	0.0051	0.5	-0.6	-0.4	-0.3	-0.1	0.32	0.43	0.22
http://www.ensembl.org/Homo_sapiens/Variation/Summary?v=rs1177449	rs1177449	rs1177449	6	0.97	0.03	0	0	5e-05	0.47	0.11	-0.02	A	G	0.28	http://www.ncbi.nlm.nih.gov/sites/entrez?Db=gene&Cmd=ShowDetailView&TermToSearch=3841&ordinalpos=1&itool=EntrezSystem2.PEntrez.Gene.Gene_ResultsPanel.Gene_RVDocSum	KPNA5	KPNA5	0	http://www.ncbi.nlm.nih.gov/sites/entrez?Db=gene&Cmd=ShowDetailView&TermToSearch=221302&ordinalpos=1&itool=EntrezSystem2.PEntrez.Gene.Gene_ResultsPanel.Gene_RVDocSum	C6orf113	C6orf113	26	http://www.ncbi.nlm.nih.gov/sites/entrez?Db=gene&Cmd=ShowDetailView&TermToSearch=221303&ordinalpos=1&itool=EntrezSystem2.PEntrez.Gene.Gene_ResultsPanel.Gene_RVDocSum	C6orf189	C6orf189	57	2.5	1.1	0.9	-0.2	0.0024	0.0045	0.55	-0.6	-0.4	-0.3	-0.1	0.29	0.34	0.23
http://www.ensembl.org/Homo_sapiens/Variation/Summary?v=rs3822952	rs3822952	rs3822952	6	0.99	0.01	0	0	0.00018	0.72	0.12	0.01	G	A	0.21	http://www.ncbi.nlm.nih.gov/sites/entrez?Db=gene&Cmd=ShowDetailView&TermToSearch=3841&ordinalpos=1&itool=EntrezSystem2.PEntrez.Gene.Gene_ResultsPanel.Gene_RVDocSum	KPNA5	KPNA5	0	http://www.ncbi.nlm.nih.gov/sites/entrez?Db=gene&Cmd=ShowDetailView&TermToSearch=221302&ordinalpos=1&itool=EntrezSystem2.PEntrez.Gene.Gene_ResultsPanel.Gene_RVDocSum	C6orf113	C6orf113	37	http://www.ncbi.nlm.nih.gov/sites/entrez?Db=gene&Cmd=ShowDetailView&TermToSearch=221303&ordinalpos=1&itool=EntrezSystem2.PEntrez.Gene.Gene_ResultsPanel.Gene_RVDocSum	C6orf189	C6orf189	47	2.1	0.8	0.9	-0.2	0.0074	0.0046	0.59	-0.6	-0.5	0.1	-0.1	0.89	0.091	0.21
http://www.ensembl.org/Homo_sapiens/Variation/Summary?v=rs606242	rs606242	rs606242	6	0.98	0.02	0	0	8e-05	0.62	0.12	-0.01	C	T	0.26	http://www.ncbi.nlm.nih.gov/sites/entrez?Db=gene&Cmd=ShowDetailView&TermToSearch=3841&ordinalpos=1&itool=EntrezSystem2.PEntrez.Gene.Gene_ResultsPanel.Gene_RVDocSum	KPNA5	KPNA5	0	http://www.ncbi.nlm.nih.gov/sites/entrez?Db=gene&Cmd=ShowDetailView&TermToSearch=221303&ordinalpos=1&itool=EntrezSystem2.PEntrez.Gene.Gene_ResultsPanel.Gene_RVDocSum	C6orf189	C6orf189	34	http://www.ncbi.nlm.nih.gov/sites/entrez?Db=gene&Cmd=ShowDetailView&TermToSearch=221302&ordinalpos=1&itool=EntrezSystem2.PEntrez.Gene.Gene_ResultsPanel.Gene_RVDocSum	C6orf113	C6orf113	49	2.4	0.9	1.1	-0.2	0.0058	0.0029	0.53	-0.6	-0.4	-0.2	-0.1	0.39	0.3	0.24
http://www.ensembl.org/Homo_sapiens/Variation/Summary?v=rs9489025	rs9489025	rs9489025	6	0.99	0.01	0	0	0.00016	0.64	0.12	0.02	C	T	0.2	http://www.ncbi.nlm.nih.gov/sites/entrez?Db=gene&Cmd=ShowDetailView&TermToSearch=3841&ordinalpos=1&itool=EntrezSystem2.PEntrez.Gene.Gene_ResultsPanel.Gene_RVDocSum	KPNA5	KPNA5	0	http://www.ncbi.nlm.nih.gov/sites/entrez?Db=gene&Cmd=ShowDetailView&TermToSearch=221303&ordinalpos=1&itool=EntrezSystem2.PEntrez.Gene.Gene_ResultsPanel.Gene_RVDocSum	C6orf189	C6orf189	33	http://www.ncbi.nlm.nih.gov/sites/entrez?Db=gene&Cmd=ShowDetailView&TermToSearch=221302&ordinalpos=1&itool=EntrezSystem2.PEntrez.Gene.Gene_ResultsPanel.Gene_RVDocSum	C6orf113	C6orf113	51	2.1	0.8	1	-0.2	0.0084	0.0039	0.57	-0.5	-0.5	0.1	0	0.95	0.082	0.21
http://www.ensembl.org/Homo_sapiens/Variation/Summary?v=rs6568963	rs6568963	rs6568963	6	0.99	0.01	0	0	0.00016	0.61	0.12	0.02	G	C	0.2	http://www.ncbi.nlm.nih.gov/sites/entrez?Db=gene&Cmd=ShowDetailView&TermToSearch=3841&ordinalpos=1&itool=EntrezSystem2.PEntrez.Gene.Gene_ResultsPanel.Gene_RVDocSum	KPNA5	KPNA5	0	http://www.ncbi.nlm.nih.gov/sites/entrez?Db=gene&Cmd=ShowDetailView&TermToSearch=221303&ordinalpos=1&itool=EntrezSystem2.PEntrez.Gene.Gene_ResultsPanel.Gene_RVDocSum	C6orf189	C6orf189	31	http://www.ncbi.nlm.nih.gov/sites/entrez?Db=gene&Cmd=ShowDetailView&TermToSearch=221302&ordinalpos=1&itool=EntrezSystem2.PEntrez.Gene.Gene_ResultsPanel.Gene_RVDocSum	C6orf113	C6orf113	53	2.1	0.8	1	-0.2	0.0085	0.0038	0.58	-0.5	-0.5	0.1	-0.1	0.96	0.079	0.23
http://www.ensembl.org/Homo_sapiens/Variation/Summary?v=rs9489028	rs9489028	rs9489028	6	0.99	0.01	0	0	0.00017	0.54	0.12	0.02	C	T	0.2	http://www.ncbi.nlm.nih.gov/sites/entrez?Db=gene&Cmd=ShowDetailView&TermToSearch=3841&ordinalpos=1&itool=EntrezSystem2.PEntrez.Gene.Gene_ResultsPanel.Gene_RVDocSum	KPNA5	KPNA5	0	http://www.ncbi.nlm.nih.gov/sites/entrez?Db=gene&Cmd=ShowDetailView&TermToSearch=221303&ordinalpos=1&itool=EntrezSystem2.PEntrez.Gene.Gene_ResultsPanel.Gene_RVDocSum	C6orf189	C6orf189	23	http://www.ncbi.nlm.nih.gov/sites/entrez?Db=gene&Cmd=ShowDetailView&TermToSearch=221302&ordinalpos=1&itool=EntrezSystem2.PEntrez.Gene.Gene_ResultsPanel.Gene_RVDocSum	C6orf113	C6orf113	60	2.1	0.7	1	-0.2	0.0097	0.0034	0.58	-0.5	-0.5	0.1	-0.1	0.99	0.07	0.24
http://www.ensembl.org/Homo_sapiens/Variation/Summary?v=rs9400957	rs9400957	rs9400957	6	0.99	0.01	0	0	0.00017	0.52	0.12	0.02	G	A	0.21	http://www.ncbi.nlm.nih.gov/sites/entrez?Db=gene&Cmd=ShowDetailView&TermToSearch=3841&ordinalpos=1&itool=EntrezSystem2.PEntrez.Gene.Gene_ResultsPanel.Gene_RVDocSum	KPNA5	KPNA5	0	http://www.ncbi.nlm.nih.gov/sites/entrez?Db=gene&Cmd=ShowDetailView&TermToSearch=221303&ordinalpos=1&itool=EntrezSystem2.PEntrez.Gene.Gene_ResultsPanel.Gene_RVDocSum	C6orf189	C6orf189	21	http://www.ncbi.nlm.nih.gov/sites/entrez?Db=gene&Cmd=ShowDetailView&TermToSearch=222545&ordinalpos=1&itool=EntrezSystem2.PEntrez.Gene.Gene_ResultsPanel.Gene_RVDocSum	GPRC6A	GPRC6A	61	2.1	0.7	1	-0.2	0.0099	0.0034	0.58	-0.5	-0.5	0.2	-0.1	0.98	0.068	0.25
http://www.ensembl.org/Homo_sapiens/Variation/Summary?v=rs598405	rs598405	rs598405	6	0.98	0.02	0	0	9.5e-05	0.87	0.12	-0.01	A	G	0.25	http://www.ncbi.nlm.nih.gov/sites/entrez?Db=gene&Cmd=ShowDetailView&TermToSearch=3841&ordinalpos=1&itool=EntrezSystem2.PEntrez.Gene.Gene_ResultsPanel.Gene_RVDocSum	KPNA5	KPNA5	0	http://www.ncbi.nlm.nih.gov/sites/entrez?Db=gene&Cmd=ShowDetailView&TermToSearch=221303&ordinalpos=1&itool=EntrezSystem2.PEntrez.Gene.Gene_ResultsPanel.Gene_RVDocSum	C6orf189	C6orf189	20	http://www.ncbi.nlm.nih.gov/sites/entrez?Db=gene&Cmd=ShowDetailView&TermToSearch=222545&ordinalpos=1&itool=EntrezSystem2.PEntrez.Gene.Gene_ResultsPanel.Gene_RVDocSum	GPRC6A	GPRC6A	60	2.3	0.8	1.1	-0.2	0.0077	0.0025	0.54	-0.6	-0.4	-0.2	-0.1	0.54	0.21	0.24
http://www.ensembl.org/Homo_sapiens/Variation/Summary?v=rs13590	rs13590	rs13590	6	0.99	0.01	0	0	0.00017	0.52	0.12	0.02	T	A	0.2	http://www.ncbi.nlm.nih.gov/sites/entrez?Db=gene&Cmd=ShowDetailView&TermToSearch=3841&ordinalpos=1&itool=EntrezSystem2.PEntrez.Gene.Gene_ResultsPanel.Gene_RVDocSum	KPNA5	KPNA5	0	http://www.ncbi.nlm.nih.gov/sites/entrez?Db=gene&Cmd=ShowDetailView&TermToSearch=221303&ordinalpos=1&itool=EntrezSystem2.PEntrez.Gene.Gene_ResultsPanel.Gene_RVDocSum	C6orf189	C6orf189	18	http://www.ncbi.nlm.nih.gov/sites/entrez?Db=gene&Cmd=ShowDetailView&TermToSearch=222545&ordinalpos=1&itool=EntrezSystem2.PEntrez.Gene.Gene_ResultsPanel.Gene_RVDocSum	GPRC6A	GPRC6A	57	2.1	0.7	1	-0.2	0.01	0.0033	0.57	-0.5	-0.5	0.1	-0.1	0.94	0.077	0.24
http://www.ensembl.org/Homo_sapiens/Variation/Summary?v=rs8191890	rs8191890	rs8191890	6	0.98	0.02	0	0	0.00012	0.93	0.2	0	C	A	0.1	http://www.ncbi.nlm.nih.gov/sites/entrez?Db=gene&Cmd=ShowDetailView&TermToSearch=3482&ordinalpos=1&itool=EntrezSystem2.PEntrez.Gene.Gene_ResultsPanel.Gene_RVDocSum	IGF2R	IGF2R	0	http://www.ncbi.nlm.nih.gov/sites/entrez?Db=gene&Cmd=ShowDetailView&TermToSearch=729603&ordinalpos=1&itool=EntrezSystem2.PEntrez.Gene.Gene_ResultsPanel.Gene_RVDocSum	LOC729603	LOC729603	19	http://www.ncbi.nlm.nih.gov/sites/entrez?Db=gene&Cmd=ShowDetailView&TermToSearch=6580&ordinalpos=1&itool=EntrezSystem2.PEntrez.Gene.Gene_ResultsPanel.Gene_RVDocSum	SLC22A1	SLC22A1	48	2.2	1.1	0.1	0.3	0.0028	0.11	0.044	-0.4	-0.3	-0.2	-0.2	0.74	0.71	0.86
http://www.ensembl.org/Homo_sapiens/Variation/Summary?v=rs1921835	rs1921835	rs1921835	7	0.95	0.05	0	0	2.9e-05	0.2	-0.19	-0.06	T	C	0.08	http://www.ncbi.nlm.nih.gov/sites/entrez?Db=gene&Cmd=ShowDetailView&TermToSearch=25928&ordinalpos=1&itool=EntrezSystem2.PEntrez.Gene.Gene_ResultsPanel.Gene_RVDocSum	SOSTDC1	SOSTDC1	17	http://www.ncbi.nlm.nih.gov/sites/entrez?Db=gene&Cmd=ShowDetailView&TermToSearch=442511&ordinalpos=1&itool=EntrezSystem2.PEntrez.Gene.Gene_ResultsPanel.Gene_RVDocSum	LOC442511	LOC442511	24	http://www.ncbi.nlm.nih.gov/sites/entrez?Db=gene&Cmd=ShowDetailView&TermToSearch=729920&ordinalpos=1&itool=EntrezSystem2.PEntrez.Gene.Gene_ResultsPanel.Gene_RVDocSum	LOC729920	LOC729920	68	2.8	0.2	2.3	0.1	0.064	6.4e-05	0.11	-0.2	-0.1	-0.3	0	0.21	0.85	0.19
http://www.ensembl.org/Homo_sapiens/Variation/Summary?v=rs4721500	rs4721500	rs4721500	7	0.92	0.08	0	0.01	1.6e-05	0.15	-0.21	-0.07	A	G	0.08	http://www.ncbi.nlm.nih.gov/sites/entrez?Db=gene&Cmd=ShowDetailView&TermToSearch=25928&ordinalpos=1&itool=EntrezSystem2.PEntrez.Gene.Gene_ResultsPanel.Gene_RVDocSum	SOSTDC1	SOSTDC1	16	http://www.ncbi.nlm.nih.gov/sites/entrez?Db=gene&Cmd=ShowDetailView&TermToSearch=442511&ordinalpos=1&itool=EntrezSystem2.PEntrez.Gene.Gene_ResultsPanel.Gene_RVDocSum	LOC442511	LOC442511	24	http://www.ncbi.nlm.nih.gov/sites/entrez?Db=gene&Cmd=ShowDetailView&TermToSearch=729920&ordinalpos=1&itool=EntrezSystem2.PEntrez.Gene.Gene_ResultsPanel.Gene_RVDocSum	LOC729920	LOC729920	69	3	0.2	2.1	0.1	0.059	0.00011	0.088	-0.1	-0.1	-0.3	0.2	0.22	0.83	0.056
http://www.ensembl.org/Homo_sapiens/Variation/Summary?v=rs10238442	rs10238442	rs10238442	7	0.9	0.09	0	0.01	1.2e-05	0.12	-0.21	-0.08	A	G	0.07	http://www.ncbi.nlm.nih.gov/sites/entrez?Db=gene&Cmd=ShowDetailView&TermToSearch=25928&ordinalpos=1&itool=EntrezSystem2.PEntrez.Gene.Gene_ResultsPanel.Gene_RVDocSum	SOSTDC1	SOSTDC1	14	http://www.ncbi.nlm.nih.gov/sites/entrez?Db=gene&Cmd=ShowDetailView&TermToSearch=442511&ordinalpos=1&itool=EntrezSystem2.PEntrez.Gene.Gene_ResultsPanel.Gene_RVDocSum	LOC442511	LOC442511	26	http://www.ncbi.nlm.nih.gov/sites/entrez?Db=gene&Cmd=ShowDetailView&TermToSearch=729920&ordinalpos=1&itool=EntrezSystem2.PEntrez.Gene.Gene_ResultsPanel.Gene_RVDocSum	LOC729920	LOC729920	71	3	0.2	2.1	0.1	0.061	0.00011	0.083	0	-0.1	-0.3	0.3	0.24	0.95	0.041
http://www.ensembl.org/Homo_sapiens/Variation/Summary?v=rs1921831	rs1921831	rs1921831	7	0.91	0.09	0	0.01	1.3e-05	0.17	-0.21	-0.07	G	A	0.07	http://www.ncbi.nlm.nih.gov/sites/entrez?Db=gene&Cmd=ShowDetailView&TermToSearch=25928&ordinalpos=1&itool=EntrezSystem2.PEntrez.Gene.Gene_ResultsPanel.Gene_RVDocSum	SOSTDC1	SOSTDC1	14	http://www.ncbi.nlm.nih.gov/sites/entrez?Db=gene&Cmd=ShowDetailView&TermToSearch=442511&ordinalpos=1&itool=EntrezSystem2.PEntrez.Gene.Gene_ResultsPanel.Gene_RVDocSum	LOC442511	LOC442511	26	http://www.ncbi.nlm.nih.gov/sites/entrez?Db=gene&Cmd=ShowDetailView&TermToSearch=729920&ordinalpos=1&itool=EntrezSystem2.PEntrez.Gene.Gene_ResultsPanel.Gene_RVDocSum	LOC729920	LOC729920	71	3	0.2	2.1	0.1	0.061	0.0001	0.089	-0.1	-0.1	-0.3	0.2	0.24	0.81	0.059
http://www.ensembl.org/Homo_sapiens/Variation/Summary?v=rs4721503	rs4721503	rs4721503	7	0.9	0.1	0	0.01	1.2e-05	0.3	-0.19	-0.05	T	C	0.09	http://www.ncbi.nlm.nih.gov/sites/entrez?Db=gene&Cmd=ShowDetailView&TermToSearch=25928&ordinalpos=1&itool=EntrezSystem2.PEntrez.Gene.Gene_ResultsPanel.Gene_RVDocSum	SOSTDC1	SOSTDC1	7	http://www.ncbi.nlm.nih.gov/sites/entrez?Db=gene&Cmd=ShowDetailView&TermToSearch=442511&ordinalpos=1&itool=EntrezSystem2.PEntrez.Gene.Gene_ResultsPanel.Gene_RVDocSum	LOC442511	LOC442511	33	http://www.ncbi.nlm.nih.gov/sites/entrez?Db=gene&Cmd=ShowDetailView&TermToSearch=729920&ordinalpos=1&itool=EntrezSystem2.PEntrez.Gene.Gene_ResultsPanel.Gene_RVDocSum	LOC729920	LOC729920	78	3.1	0.3	1.9	0.1	0.035	0.00023	0.11	-0.3	-0.2	-0.3	0.1	0.43	0.91	0.13
http://www.ensembl.org/Homo_sapiens/Variation/Summary?v=rs10270805	rs10270805	rs10270805	7	0.88	0.11	0	0.01	9.3e-06	0.2	-0.21	-0.06	A	G	0.07	http://www.ncbi.nlm.nih.gov/sites/entrez?Db=gene&Cmd=ShowDetailView&TermToSearch=25928&ordinalpos=1&itool=EntrezSystem2.PEntrez.Gene.Gene_ResultsPanel.Gene_RVDocSum	SOSTDC1	SOSTDC1	1	http://www.ncbi.nlm.nih.gov/sites/entrez?Db=gene&Cmd=ShowDetailView&TermToSearch=442511&ordinalpos=1&itool=EntrezSystem2.PEntrez.Gene.Gene_ResultsPanel.Gene_RVDocSum	LOC442511	LOC442511	39	http://www.ncbi.nlm.nih.gov/sites/entrez?Db=gene&Cmd=ShowDetailView&TermToSearch=729920&ordinalpos=1&itool=EntrezSystem2.PEntrez.Gene.Gene_ResultsPanel.Gene_RVDocSum	LOC729920	LOC729920	84	3.2	0.2	2.2	0.1	0.061	8.1e-05	0.09	-0.2	-0.1	-0.3	0.2	0.24	0.73	0.062
http://www.ensembl.org/Homo_sapiens/Variation/Summary?v=rs9791629	rs9791629	rs9791629	7	0.88	0.11	0	0.01	9.3e-06	0.2	-0.21	-0.06	C	T	0.07	http://www.ncbi.nlm.nih.gov/sites/entrez?Db=gene&Cmd=ShowDetailView&TermToSearch=25928&ordinalpos=1&itool=EntrezSystem2.PEntrez.Gene.Gene_ResultsPanel.Gene_RVDocSum	SOSTDC1	SOSTDC1	1	http://www.ncbi.nlm.nih.gov/sites/entrez?Db=gene&Cmd=ShowDetailView&TermToSearch=442511&ordinalpos=1&itool=EntrezSystem2.PEntrez.Gene.Gene_ResultsPanel.Gene_RVDocSum	LOC442511	LOC442511	39	http://www.ncbi.nlm.nih.gov/sites/entrez?Db=gene&Cmd=ShowDetailView&TermToSearch=729920&ordinalpos=1&itool=EntrezSystem2.PEntrez.Gene.Gene_ResultsPanel.Gene_RVDocSum	LOC729920	LOC729920	84	3.2	0.2	2.2	0.1	0.061	8.1e-05	0.09	-0.2	-0.1	-0.3	0.2	0.24	0.73	0.062
http://www.ensembl.org/Homo_sapiens/Variation/Summary?v=rs6971172	rs6971172	rs6971172	7	0.97	0.03	0	0	4.7e-05	0.19	-0.2	-0.06	G	C	0.07	http://www.ncbi.nlm.nih.gov/sites/entrez?Db=gene&Cmd=ShowDetailView&TermToSearch=25928&ordinalpos=1&itool=EntrezSystem2.PEntrez.Gene.Gene_ResultsPanel.Gene_RVDocSum	SOSTDC1	SOSTDC1	0	http://www.ncbi.nlm.nih.gov/sites/entrez?Db=gene&Cmd=ShowDetailView&TermToSearch=442511&ordinalpos=1&itool=EntrezSystem2.PEntrez.Gene.Gene_ResultsPanel.Gene_RVDocSum	LOC442511	LOC442511	43	http://www.ncbi.nlm.nih.gov/sites/entrez?Db=gene&Cmd=ShowDetailView&TermToSearch=729920&ordinalpos=1&itool=EntrezSystem2.PEntrez.Gene.Gene_ResultsPanel.Gene_RVDocSum	LOC729920	LOC729920	88	2.6	0.2	1.8	0	0.075	0.00029	0.16	-0.1	-0.2	-0.3	0.3	0.48	0.93	0.043
http://www.ensembl.org/Homo_sapiens/Variation/Summary?v=rs6945425	rs6945425	rs6945425	7	0.98	0.02	0	0	7.8e-05	0.62	-0.16	-0.02	T	C	0.11	http://www.ncbi.nlm.nih.gov/sites/entrez?Db=gene&Cmd=ShowDetailView&TermToSearch=25928&ordinalpos=1&itool=EntrezSystem2.PEntrez.Gene.Gene_ResultsPanel.Gene_RVDocSum	SOSTDC1	SOSTDC1	0	http://www.ncbi.nlm.nih.gov/sites/entrez?Db=gene&Cmd=ShowDetailView&TermToSearch=442511&ordinalpos=1&itool=EntrezSystem2.PEntrez.Gene.Gene_ResultsPanel.Gene_RVDocSum	LOC442511	LOC442511	44	http://www.ncbi.nlm.nih.gov/sites/entrez?Db=gene&Cmd=ShowDetailView&TermToSearch=729920&ordinalpos=1&itool=EntrezSystem2.PEntrez.Gene.Gene_ResultsPanel.Gene_RVDocSum	LOC729920	LOC729920	89	2.4	0.1	1.8	0.1	0.094	0.00039	0.13	-0.4	-0.3	-0.3	0	0.87	0.75	0.15
http://www.ensembl.org/Homo_sapiens/Variation/Summary?v=rs2528478	rs2528478	rs2528478	7	0.97	0.03	0	0	5.3e-05	0.21	-0.2	-0.06	C	G	0.07	http://www.ncbi.nlm.nih.gov/sites/entrez?Db=gene&Cmd=ShowDetailView&TermToSearch=25928&ordinalpos=1&itool=EntrezSystem2.PEntrez.Gene.Gene_ResultsPanel.Gene_RVDocSum	SOSTDC1	SOSTDC1	1	http://www.ncbi.nlm.nih.gov/sites/entrez?Db=gene&Cmd=ShowDetailView&TermToSearch=442511&ordinalpos=1&itool=EntrezSystem2.PEntrez.Gene.Gene_ResultsPanel.Gene_RVDocSum	LOC442511	LOC442511	46	http://www.ncbi.nlm.nih.gov/sites/entrez?Db=gene&Cmd=ShowDetailView&TermToSearch=729920&ordinalpos=1&itool=EntrezSystem2.PEntrez.Gene.Gene_ResultsPanel.Gene_RVDocSum	LOC729920	LOC729920	90	2.5	0.1	1.8	0	0.083	0.0003	0.17	-0.2	-0.2	-0.3	0.2	0.54	0.92	0.046
http://www.ensembl.org/Homo_sapiens/Variation/Summary?v=rs2528477	rs2528477	rs2528477	7	0.98	0.02	0	0	0.0001	0.24	-0.18	-0.05	T	C	0.08	http://www.ncbi.nlm.nih.gov/sites/entrez?Db=gene&Cmd=ShowDetailView&TermToSearch=25928&ordinalpos=1&itool=EntrezSystem2.PEntrez.Gene.Gene_ResultsPanel.Gene_RVDocSum	SOSTDC1	SOSTDC1	2	http://www.ncbi.nlm.nih.gov/sites/entrez?Db=gene&Cmd=ShowDetailView&TermToSearch=442511&ordinalpos=1&itool=EntrezSystem2.PEntrez.Gene.Gene_ResultsPanel.Gene_RVDocSum	LOC442511	LOC442511	46	http://www.ncbi.nlm.nih.gov/sites/entrez?Db=gene&Cmd=ShowDetailView&TermToSearch=729920&ordinalpos=1&itool=EntrezSystem2.PEntrez.Gene.Gene_ResultsPanel.Gene_RVDocSum	LOC729920	LOC729920	91	2.3	0.1	1.6	0	0.083	0.00057	0.24	-0.2	-0.2	-0.3	0.2	0.53	0.94	0.074
http://www.ensembl.org/Homo_sapiens/Variation/Summary?v=rs2528475	rs2528475	rs2528475	7	0.98	0.01	0	0	0.00012	0.18	-0.19	-0.07	G	A	0.08	http://www.ncbi.nlm.nih.gov/sites/entrez?Db=gene&Cmd=ShowDetailView&TermToSearch=25928&ordinalpos=1&itool=EntrezSystem2.PEntrez.Gene.Gene_ResultsPanel.Gene_RVDocSum	SOSTDC1	SOSTDC1	8	http://www.ncbi.nlm.nih.gov/sites/entrez?Db=gene&Cmd=ShowDetailView&TermToSearch=442511&ordinalpos=1&itool=EntrezSystem2.PEntrez.Gene.Gene_ResultsPanel.Gene_RVDocSum	LOC442511	LOC442511	52	http://www.ncbi.nlm.nih.gov/sites/entrez?Db=gene&Cmd=ShowDetailView&TermToSearch=729920&ordinalpos=1&itool=EntrezSystem2.PEntrez.Gene.Gene_ResultsPanel.Gene_RVDocSum	LOC729920	LOC729920	97	2.2	0	1.8	0	0.14	0.00022	0.2	-0.1	-0.2	-0.3	0.2	0.55	0.81	0.044
http://www.ensembl.org/Homo_sapiens/Variation/Summary?v=rs2528468	rs2528468	rs2528468	7	0.99	0.01	0	0	0.00018	0.2	-0.21	-0.07	A	G	0.07	http://www.ncbi.nlm.nih.gov/sites/entrez?Db=gene&Cmd=ShowDetailView&TermToSearch=25928&ordinalpos=1&itool=EntrezSystem2.PEntrez.Gene.Gene_ResultsPanel.Gene_RVDocSum	SOSTDC1	SOSTDC1	14	http://www.ncbi.nlm.nih.gov/sites/entrez?Db=gene&Cmd=ShowDetailView&TermToSearch=442511&ordinalpos=1&itool=EntrezSystem2.PEntrez.Gene.Gene_ResultsPanel.Gene_RVDocSum	LOC442511	LOC442511	59	http://www.ncbi.nlm.nih.gov/sites/entrez?Db=gene&Cmd=ShowDetailView&TermToSearch=317727&ordinalpos=1&itool=EntrezSystem2.PEntrez.Gene.Gene_ResultsPanel.Gene_RVDocSum	LOC317727	LOC317727	103	2	0.1	1.5	0	0.097	0.00063	0.2	-0.1	-0.2	-0.2	0.3	0.51	0.93	0.04
http://www.ensembl.org/Homo_sapiens/Variation/Summary?v=rs4719621	rs4719621	rs4719621	7	0.98	0.02	0	0	0.00012	0.35	-0.17	0.04	G	A	0.27	http://www.ncbi.nlm.nih.gov/sites/entrez?Db=gene&Cmd=ShowDetailView&TermToSearch=402641&ordinalpos=1&itool=EntrezSystem2.PEntrez.Gene.Gene_ResultsPanel.Gene_RVDocSum	LOC402641	LOC402641	13	http://www.ncbi.nlm.nih.gov/sites/entrez?Db=gene&Cmd=ShowDetailView&TermToSearch=340273&ordinalpos=1&itool=EntrezSystem2.PEntrez.Gene.Gene_ResultsPanel.Gene_RVDocSum	ABCB5	ABCB5	44	http://www.ncbi.nlm.nih.gov/sites/entrez?Db=gene&Cmd=ShowDetailView&TermToSearch=221833&ordinalpos=1&itool=EntrezSystem2.PEntrez.Gene.Gene_ResultsPanel.Gene_RVDocSum	SP8	SP8	179	2.2	1.4	0.1	0.1	0.00074	0.073	0.11	-0.3	-0.2	-0.3	-0.2	0.54	0.63	0.56
http://www.ensembl.org/Homo_sapiens/Variation/Summary?v=rs17143180	rs17143180	rs17143180	7	0.91	0.08	0	0	1.5e-05	0.81	0.12	-0.01	G	C	0.25	http://www.ncbi.nlm.nih.gov/sites/entrez?Db=gene&Cmd=ShowDetailView&TermToSearch=402641&ordinalpos=1&itool=EntrezSystem2.PEntrez.Gene.Gene_ResultsPanel.Gene_RVDocSum	LOC402641	LOC402641	17	http://www.ncbi.nlm.nih.gov/sites/entrez?Db=gene&Cmd=ShowDetailView&TermToSearch=340273&ordinalpos=1&itool=EntrezSystem2.PEntrez.Gene.Gene_ResultsPanel.Gene_RVDocSum	ABCB5	ABCB5	40	http://www.ncbi.nlm.nih.gov/sites/entrez?Db=gene&Cmd=ShowDetailView&TermToSearch=221833&ordinalpos=1&itool=EntrezSystem2.PEntrez.Gene.Gene_ResultsPanel.Gene_RVDocSum	SP8	SP8	175	3	2	0.2	0	0.00021	0.057	0.2	-0.6	-0.5	-0.3	-0.2	0.88	0.66	0.77
http://www.ensembl.org/Homo_sapiens/Variation/Summary?v=rs10950821	rs10950821	rs10950821	7	0.85	0.15	0	0	7.4e-06	0.86	0.13	0	G	C	0.26	http://www.ncbi.nlm.nih.gov/sites/entrez?Db=gene&Cmd=ShowDetailView&TermToSearch=402641&ordinalpos=1&itool=EntrezSystem2.PEntrez.Gene.Gene_ResultsPanel.Gene_RVDocSum	LOC402641	LOC402641	17	http://www.ncbi.nlm.nih.gov/sites/entrez?Db=gene&Cmd=ShowDetailView&TermToSearch=340273&ordinalpos=1&itool=EntrezSystem2.PEntrez.Gene.Gene_ResultsPanel.Gene_RVDocSum	ABCB5	ABCB5	40	http://www.ncbi.nlm.nih.gov/sites/entrez?Db=gene&Cmd=ShowDetailView&TermToSearch=221833&ordinalpos=1&itool=EntrezSystem2.PEntrez.Gene.Gene_ResultsPanel.Gene_RVDocSum	SP8	SP8	175	3.3	2.3	0.2	-0.1	9.1e-05	0.055	0.21	-0.6	-0.5	-0.4	-0.3	0.94	0.67	0.77
http://www.ensembl.org/Homo_sapiens/Variation/Summary?v=rs12667658	rs12667658	rs12667658	7	0.98	0.02	0	0	7.9e-05	0.98	0.11	0	A	T	0.29	http://www.ncbi.nlm.nih.gov/sites/entrez?Db=gene&Cmd=ShowDetailView&TermToSearch=340273&ordinalpos=1&itool=EntrezSystem2.PEntrez.Gene.Gene_ResultsPanel.Gene_RVDocSum	ABCB5	ABCB5	28	http://www.ncbi.nlm.nih.gov/sites/entrez?Db=gene&Cmd=ShowDetailView&TermToSearch=402641&ordinalpos=1&itool=EntrezSystem2.PEntrez.Gene.Gene_ResultsPanel.Gene_RVDocSum	LOC402641	LOC402641	30	http://www.ncbi.nlm.nih.gov/sites/entrez?Db=gene&Cmd=ShowDetailView&TermToSearch=221833&ordinalpos=1&itool=EntrezSystem2.PEntrez.Gene.Gene_ResultsPanel.Gene_RVDocSum	SP8	SP8	162	2.4	1.8	0.1	-0.1	0.00049	0.077	0.3	-0.6	-0.5	-0.4	-0.3	0.96	0.96	0.92
http://www.ensembl.org/Homo_sapiens/Variation/Summary?v=rs7777864	rs7777864	rs7777864	7	0.89	0.11	0	0	1.1e-05	0.99	0.12	0	C	G	0.26	http://www.ncbi.nlm.nih.gov/sites/entrez?Db=gene&Cmd=ShowDetailView&TermToSearch=340273&ordinalpos=1&itool=EntrezSystem2.PEntrez.Gene.Gene_ResultsPanel.Gene_RVDocSum	ABCB5	ABCB5	23	http://www.ncbi.nlm.nih.gov/sites/entrez?Db=gene&Cmd=ShowDetailView&TermToSearch=402641&ordinalpos=1&itool=EntrezSystem2.PEntrez.Gene.Gene_ResultsPanel.Gene_RVDocSum	LOC402641	LOC402641	34	http://www.ncbi.nlm.nih.gov/sites/entrez?Db=gene&Cmd=ShowDetailView&TermToSearch=221833&ordinalpos=1&itool=EntrezSystem2.PEntrez.Gene.Gene_ResultsPanel.Gene_RVDocSum	SP8	SP8	158	3.1	2.4	0.1	-0.1	8.3e-05	0.068	0.23	-0.6	-0.5	-0.4	-0.3	0.97	0.8	0.78
http://www.ensembl.org/Homo_sapiens/Variation/Summary?v=rs1960321	rs1960321	rs1960321	7	0.99	0.01	0	0	0.00019	0.11	0.1	-0.04	T	C	0.35	http://www.ncbi.nlm.nih.gov/sites/entrez?Db=gene&Cmd=ShowDetailView&TermToSearch=168417&ordinalpos=1&itool=EntrezSystem2.PEntrez.Gene.Gene_ResultsPanel.Gene_RVDocSum	ZNF679	ZNF679	4	http://www.ncbi.nlm.nih.gov/sites/entrez?Db=gene&Cmd=ShowDetailView&TermToSearch=728927&ordinalpos=1&itool=EntrezSystem2.PEntrez.Gene.Gene_ResultsPanel.Gene_RVDocSum	LOC728927	LOC728927	61	http://www.ncbi.nlm.nih.gov/sites/entrez?Db=gene&Cmd=ShowDetailView&TermToSearch=442320&ordinalpos=1&itool=EntrezSystem2.PEntrez.Gene.Gene_ResultsPanel.Gene_RVDocSum	LOC442320	LOC442320	88	2.1	-0.1	0.4	1.7	0.15	0.031	0.00036	-0.1	-0.2	-0.3	-0.3	0.26	0.28	0.67
rs-link	rsnum	SNP	chr	HO	HS	HD	HS+D	P-value-S	P-value-D	Effect-S	Effect-D	Minor Allele	Major Allele	MAF	GENE1-link	GENE1	GENE1	dist1 (Kb)	GENE2-link	GENE2	GENE2	dist2 (Kb)	GENE3-link	GENE3	GENE3	dist3 (Kb)	log10BF-S	log10BF-S-TNT	log10BF-S-PRINCE	log10BF-S-CAP	P-value-S-TNT	P-value-S-PRINCE	P-value-S-CAP	log10BF-D	log10BF-D-TNT	log10BF-D-PRINCE	log10BF-D-CAP	P-value-D-TNT	P-value-D-PRINCE	P-value-D-CAP
http://www.ensembl.org/Homo_sapiens/Variation/Summary?v=rs6972236	rs6972236	rs6972236	7	0.99	0.01	0	0	0.00019	0.11	0.1	-0.04	C	T	0.35	http://www.ncbi.nlm.nih.gov/sites/entrez?Db=gene&Cmd=ShowDetailView&TermToSearch=168417&ordinalpos=1&itool=EntrezSystem2.PEntrez.Gene.Gene_ResultsPanel.Gene_RVDocSum	ZNF679	ZNF679	5	http://www.ncbi.nlm.nih.gov/sites/entrez?Db=gene&Cmd=ShowDetailView&TermToSearch=728927&ordinalpos=1&itool=EntrezSystem2.PEntrez.Gene.Gene_ResultsPanel.Gene_RVDocSum	LOC728927	LOC728927	60	http://www.ncbi.nlm.nih.gov/sites/entrez?Db=gene&Cmd=ShowDetailView&TermToSearch=442320&ordinalpos=1&itool=EntrezSystem2.PEntrez.Gene.Gene_ResultsPanel.Gene_RVDocSum	LOC442320	LOC442320	89	2.1	-0.1	0.4	1.7	0.15	0.031	0.00036	-0.1	-0.2	-0.3	-0.3	0.26	0.28	0.67
http://www.ensembl.org/Homo_sapiens/Variation/Summary?v=rs10266483	rs10266483	rs10266483	7	0.99	0.01	0	0	0.00018	0.11	0.1	-0.04	A	G	0.35	http://www.ncbi.nlm.nih.gov/sites/entrez?Db=gene&Cmd=ShowDetailView&TermToSearch=168417&ordinalpos=1&itool=EntrezSystem2.PEntrez.Gene.Gene_ResultsPanel.Gene_RVDocSum	ZNF679	ZNF679	6	http://www.ncbi.nlm.nih.gov/sites/entrez?Db=gene&Cmd=ShowDetailView&TermToSearch=728927&ordinalpos=1&itool=EntrezSystem2.PEntrez.Gene.Gene_ResultsPanel.Gene_RVDocSum	LOC728927	LOC728927	59	http://www.ncbi.nlm.nih.gov/sites/entrez?Db=gene&Cmd=ShowDetailView&TermToSearch=442320&ordinalpos=1&itool=EntrezSystem2.PEntrez.Gene.Gene_ResultsPanel.Gene_RVDocSum	LOC442320	LOC442320	90	2.1	-0.1	0.4	1.7	0.14	0.031	0.00035	-0.1	-0.2	-0.3	-0.3	0.26	0.28	0.67
http://www.ensembl.org/Homo_sapiens/Variation/Summary?v=rs683689	rs683689	rs683689	7	0.99	0.01	0	0	0.00015	0.17	0.1	-0.03	G	C	0.32	http://www.ncbi.nlm.nih.gov/sites/entrez?Db=gene&Cmd=ShowDetailView&TermToSearch=168417&ordinalpos=1&itool=EntrezSystem2.PEntrez.Gene.Gene_ResultsPanel.Gene_RVDocSum	ZNF679	ZNF679	15	http://www.ncbi.nlm.nih.gov/sites/entrez?Db=gene&Cmd=ShowDetailView&TermToSearch=728927&ordinalpos=1&itool=EntrezSystem2.PEntrez.Gene.Gene_ResultsPanel.Gene_RVDocSum	LOC728927	LOC728927	49	http://www.ncbi.nlm.nih.gov/sites/entrez?Db=gene&Cmd=ShowDetailView&TermToSearch=442320&ordinalpos=1&itool=EntrezSystem2.PEntrez.Gene.Gene_ResultsPanel.Gene_RVDocSum	LOC442320	LOC442320	99	2.1	-0.1	0.6	1.6	0.15	0.015	0.00045	-0.3	-0.3	-0.3	-0.3	0.3	0.36	0.78
http://www.ensembl.org/Homo_sapiens/Variation/Summary?v=rs651934	rs651934	rs651934	7	0.98	0.01	0	0	0.00011	0.19	0.1	-0.03	C	T	0.32	http://www.ncbi.nlm.nih.gov/sites/entrez?Db=gene&Cmd=ShowDetailView&TermToSearch=168417&ordinalpos=1&itool=EntrezSystem2.PEntrez.Gene.Gene_ResultsPanel.Gene_RVDocSum	ZNF679	ZNF679	17	http://www.ncbi.nlm.nih.gov/sites/entrez?Db=gene&Cmd=ShowDetailView&TermToSearch=728927&ordinalpos=1&itool=EntrezSystem2.PEntrez.Gene.Gene_ResultsPanel.Gene_RVDocSum	LOC728927	LOC728927	48	http://www.ncbi.nlm.nih.gov/sites/entrez?Db=gene&Cmd=ShowDetailView&TermToSearch=442320&ordinalpos=1&itool=EntrezSystem2.PEntrez.Gene.Gene_ResultsPanel.Gene_RVDocSum	LOC442320	LOC442320	101	2.2	-0.2	0.7	1.7	0.15	0.012	0.0004	-0.4	-0.3	-0.4	-0.3	0.31	0.39	0.83
http://www.ensembl.org/Homo_sapiens/Variation/Summary?v=rs687547	rs687547	rs687547	7	0.99	0.01	0	0	0.00016	0.16	0.09	-0.03	T	C	0.36	http://www.ncbi.nlm.nih.gov/sites/entrez?Db=gene&Cmd=ShowDetailView&TermToSearch=168417&ordinalpos=1&itool=EntrezSystem2.PEntrez.Gene.Gene_ResultsPanel.Gene_RVDocSum	ZNF679	ZNF679	18	http://www.ncbi.nlm.nih.gov/sites/entrez?Db=gene&Cmd=ShowDetailView&TermToSearch=728927&ordinalpos=1&itool=EntrezSystem2.PEntrez.Gene.Gene_ResultsPanel.Gene_RVDocSum	LOC728927	LOC728927	47	http://www.ncbi.nlm.nih.gov/sites/entrez?Db=gene&Cmd=ShowDetailView&TermToSearch=442320&ordinalpos=1&itool=EntrezSystem2.PEntrez.Gene.Gene_ResultsPanel.Gene_RVDocSum	LOC442320	LOC442320	101	2.1	0.1	0.2	1.4	0.056	0.048	0.00098	-0.3	-0.1	-0.4	-0.3	0.24	0.51	0.63
http://www.ensembl.org/Homo_sapiens/Variation/Summary?v=rs624257	rs624257	rs624257	7	0.99	0.01	0	0	0.00016	0.16	0.09	-0.03	G	A	0.36	http://www.ncbi.nlm.nih.gov/sites/entrez?Db=gene&Cmd=ShowDetailView&TermToSearch=168417&ordinalpos=1&itool=EntrezSystem2.PEntrez.Gene.Gene_ResultsPanel.Gene_RVDocSum	ZNF679	ZNF679	18	http://www.ncbi.nlm.nih.gov/sites/entrez?Db=gene&Cmd=ShowDetailView&TermToSearch=728927&ordinalpos=1&itool=EntrezSystem2.PEntrez.Gene.Gene_ResultsPanel.Gene_RVDocSum	LOC728927	LOC728927	47	http://www.ncbi.nlm.nih.gov/sites/entrez?Db=gene&Cmd=ShowDetailView&TermToSearch=442320&ordinalpos=1&itool=EntrezSystem2.PEntrez.Gene.Gene_ResultsPanel.Gene_RVDocSum	LOC442320	LOC442320	102	2.1	0.1	0.2	1.4	0.057	0.048	0.00098	-0.3	-0.1	-0.4	-0.3	0.24	0.51	0.63
http://www.ensembl.org/Homo_sapiens/Variation/Summary?v=rs683510	rs683510	rs683510	7	0.99	0.01	0	0	0.00017	0.2	0.09	-0.03	A	C	0.32	http://www.ncbi.nlm.nih.gov/sites/entrez?Db=gene&Cmd=ShowDetailView&TermToSearch=168417&ordinalpos=1&itool=EntrezSystem2.PEntrez.Gene.Gene_ResultsPanel.Gene_RVDocSum	ZNF679	ZNF679	22	http://www.ncbi.nlm.nih.gov/sites/entrez?Db=gene&Cmd=ShowDetailView&TermToSearch=728927&ordinalpos=1&itool=EntrezSystem2.PEntrez.Gene.Gene_ResultsPanel.Gene_RVDocSum	LOC728927	LOC728927	43	http://www.ncbi.nlm.nih.gov/sites/entrez?Db=gene&Cmd=ShowDetailView&TermToSearch=442320&ordinalpos=1&itool=EntrezSystem2.PEntrez.Gene.Gene_ResultsPanel.Gene_RVDocSum	LOC442320	LOC442320	106	2.1	-0.1	0.6	1.4	0.13	0.015	0.00087	-0.4	-0.3	-0.4	-0.3	0.28	0.47	0.79
http://www.ensembl.org/Homo_sapiens/Variation/Summary?v=rs679883	rs679883	rs679883	7	0.99	0.01	0	0	0.00017	0.19	0.09	-0.03	T	C	0.32	http://www.ncbi.nlm.nih.gov/sites/entrez?Db=gene&Cmd=ShowDetailView&TermToSearch=168417&ordinalpos=1&itool=EntrezSystem2.PEntrez.Gene.Gene_ResultsPanel.Gene_RVDocSum	ZNF679	ZNF679	23	http://www.ncbi.nlm.nih.gov/sites/entrez?Db=gene&Cmd=ShowDetailView&TermToSearch=728927&ordinalpos=1&itool=EntrezSystem2.PEntrez.Gene.Gene_ResultsPanel.Gene_RVDocSum	LOC728927	LOC728927	42	http://www.ncbi.nlm.nih.gov/sites/entrez?Db=gene&Cmd=ShowDetailView&TermToSearch=442320&ordinalpos=1&itool=EntrezSystem2.PEntrez.Gene.Gene_ResultsPanel.Gene_RVDocSum	LOC442320	LOC442320	107	2.1	-0.1	0.6	1.5	0.13	0.016	0.00082	-0.4	-0.3	-0.4	-0.3	0.28	0.46	0.79
http://www.ensembl.org/Homo_sapiens/Variation/Summary?v=rs2237565	rs2237565	rs2237565	7	0.95	0.03	0	0.02	8.5e-05	0.014	-0.1	0.06	T	C	0.32	http://www.ncbi.nlm.nih.gov/sites/entrez?Db=gene&Cmd=ShowDetailView&TermToSearch=2913&ordinalpos=1&itool=EntrezSystem2.PEntrez.Gene.Gene_ResultsPanel.Gene_RVDocSum	GRM3	GRM3	0	http://www.ncbi.nlm.nih.gov/sites/entrez?Db=gene&Cmd=ShowDetailView&TermToSearch=222223&ordinalpos=1&itool=EntrezSystem2.PEntrez.Gene.Gene_ResultsPanel.Gene_RVDocSum	KIAA1324L	KIAA1324L	54	http://www.ncbi.nlm.nih.gov/sites/entrez?Db=gene&Cmd=ShowDetailView&TermToSearch=9988&ordinalpos=1&itool=EntrezSystem2.PEntrez.Gene.Gene_ResultsPanel.Gene_RVDocSum	DMTF1	DMTF1	326	2.6	2	0.7	-0.2	0.00024	0.068	0.4	0.8	0.1	1.1	-0.1	0.061	0.0043	0.2
http://www.ensembl.org/Homo_sapiens/Variation/Summary?v=rs6465088	rs6465088	rs6465088	7	0.89	0.1	0	0.01	1.3e-05	0.069	-0.12	0.05	G	T	0.27	http://www.ncbi.nlm.nih.gov/sites/entrez?Db=gene&Cmd=ShowDetailView&TermToSearch=2913&ordinalpos=1&itool=EntrezSystem2.PEntrez.Gene.Gene_ResultsPanel.Gene_RVDocSum	GRM3	GRM3	0	http://www.ncbi.nlm.nih.gov/sites/entrez?Db=gene&Cmd=ShowDetailView&TermToSearch=222223&ordinalpos=1&itool=EntrezSystem2.PEntrez.Gene.Gene_ResultsPanel.Gene_RVDocSum	KIAA1324L	KIAA1324L	39	http://www.ncbi.nlm.nih.gov/sites/entrez?Db=gene&Cmd=ShowDetailView&TermToSearch=9988&ordinalpos=1&itool=EntrezSystem2.PEntrez.Gene.Gene_ResultsPanel.Gene_RVDocSum	DMTF1	DMTF1	311	3.1	2.4	0.2	-0.2	7e-05	0.064	0.27	0	0.2	0	-0.1	0.049	0.1	0.16
http://www.ensembl.org/Homo_sapiens/Variation/Summary?v=rs17126	rs17126	rs17126	7	0.89	0.09	0	0.01	1.4e-05	0.07	-0.11	0.05	A	G	0.27	http://www.ncbi.nlm.nih.gov/sites/entrez?Db=gene&Cmd=ShowDetailView&TermToSearch=2913&ordinalpos=1&itool=EntrezSystem2.PEntrez.Gene.Gene_ResultsPanel.Gene_RVDocSum	GRM3	GRM3	0	http://www.ncbi.nlm.nih.gov/sites/entrez?Db=gene&Cmd=ShowDetailView&TermToSearch=222223&ordinalpos=1&itool=EntrezSystem2.PEntrez.Gene.Gene_ResultsPanel.Gene_RVDocSum	KIAA1324L	KIAA1324L	37	http://www.ncbi.nlm.nih.gov/sites/entrez?Db=gene&Cmd=ShowDetailView&TermToSearch=9988&ordinalpos=1&itool=EntrezSystem2.PEntrez.Gene.Gene_ResultsPanel.Gene_RVDocSum	DMTF1	DMTF1	310	3.1	2.4	0.2	-0.2	7.7e-05	0.064	0.27	0	0.2	0	-0.1	0.051	0.1	0.16
http://www.ensembl.org/Homo_sapiens/Variation/Summary?v=rs7789655	rs7789655	rs7789655	7	0.9	0.1	0	0.01	1.4e-05	0.096	-0.13	0.05	G	T	0.25	http://www.ncbi.nlm.nih.gov/sites/entrez?Db=gene&Cmd=ShowDetailView&TermToSearch=2913&ordinalpos=1&itool=EntrezSystem2.PEntrez.Gene.Gene_ResultsPanel.Gene_RVDocSum	GRM3	GRM3	0	http://www.ncbi.nlm.nih.gov/sites/entrez?Db=gene&Cmd=ShowDetailView&TermToSearch=222223&ordinalpos=1&itool=EntrezSystem2.PEntrez.Gene.Gene_ResultsPanel.Gene_RVDocSum	KIAA1324L	KIAA1324L	28	http://www.ncbi.nlm.nih.gov/sites/entrez?Db=gene&Cmd=ShowDetailView&TermToSearch=9988&ordinalpos=1&itool=EntrezSystem2.PEntrez.Gene.Gene_ResultsPanel.Gene_RVDocSum	DMTF1	DMTF1	301	3.1	2.2	0.4	-0.1	0.00011	0.037	0.22	0	0.4	-0.1	-0.1	0.03	0.19	0.18
http://www.ensembl.org/Homo_sapiens/Variation/Summary?v=rs11980329	rs11980329	rs11980329	7	0.99	0.01	0	0	0.00019	0.19	-0.15	0.05	A	T	0.2	http://www.ncbi.nlm.nih.gov/sites/entrez?Db=gene&Cmd=ShowDetailView&TermToSearch=222223&ordinalpos=1&itool=EntrezSystem2.PEntrez.Gene.Gene_ResultsPanel.Gene_RVDocSum	KIAA1324L	KIAA1324L	6	http://www.ncbi.nlm.nih.gov/sites/entrez?Db=gene&Cmd=ShowDetailView&TermToSearch=2913&ordinalpos=1&itool=EntrezSystem2.PEntrez.Gene.Gene_ResultsPanel.Gene_RVDocSum	GRM3	GRM3	9	http://www.ncbi.nlm.nih.gov/sites/entrez?Db=gene&Cmd=ShowDetailView&TermToSearch=9988&ordinalpos=1&itool=EntrezSystem2.PEntrez.Gene.Gene_ResultsPanel.Gene_RVDocSum	DMTF1	DMTF1	279	2.1	1.5	0.1	0	0.00063	0.088	0.15	-0.2	-0.1	0	-0.2	0.28	0.13	0.49
http://www.ensembl.org/Homo_sapiens/Variation/Summary?v=rs1029982	rs1029982	rs1029982	7	0.99	0.01	0	0	0.00015	0.69	-0.21	0.02	C	T	0.09	http://www.ncbi.nlm.nih.gov/sites/entrez?Db=gene&Cmd=ShowDetailView&TermToSearch=10135&ordinalpos=1&itool=EntrezSystem2.PEntrez.Gene.Gene_ResultsPanel.Gene_RVDocSum	PBEF1	PBEF1	27	http://www.ncbi.nlm.nih.gov/sites/entrez?Db=gene&Cmd=ShowDetailView&TermToSearch=6856&ordinalpos=1&itool=EntrezSystem2.PEntrez.Gene.Gene_ResultsPanel.Gene_RVDocSum	SYPL1	SYPL1	199	http://www.ncbi.nlm.nih.gov/sites/entrez?Db=gene&Cmd=ShowDetailView&TermToSearch=222256&ordinalpos=1&itool=EntrezSystem2.PEntrez.Gene.Gene_ResultsPanel.Gene_RVDocSum	FLJ23834	FLJ23834	278	2.1	0.4	1.8	-0.2	0.028	0.00024	0.94	-0.4	-0.2	-0.2	-0.1	0.52	0.65	0.52
http://www.ensembl.org/Homo_sapiens/Variation/Summary?v=rs9692084	rs9692084	rs9692084	7	0.99	0.01	0	0	0.00012	0.39	-0.22	0.05	C	T	0.07	http://www.ncbi.nlm.nih.gov/sites/entrez?Db=gene&Cmd=ShowDetailView&TermToSearch=10135&ordinalpos=1&itool=EntrezSystem2.PEntrez.Gene.Gene_ResultsPanel.Gene_RVDocSum	PBEF1	PBEF1	30	http://www.ncbi.nlm.nih.gov/sites/entrez?Db=gene&Cmd=ShowDetailView&TermToSearch=6856&ordinalpos=1&itool=EntrezSystem2.PEntrez.Gene.Gene_ResultsPanel.Gene_RVDocSum	SYPL1	SYPL1	202	http://www.ncbi.nlm.nih.gov/sites/entrez?Db=gene&Cmd=ShowDetailView&TermToSearch=222256&ordinalpos=1&itool=EntrezSystem2.PEntrez.Gene.Gene_ResultsPanel.Gene_RVDocSum	FLJ23834	FLJ23834	281	2.2	0.6	1.8	-0.1	0.017	0.0002	0.92	-0.3	-0.3	-0.2	0	0.63	0.9	0.23
http://www.ensembl.org/Homo_sapiens/Variation/Summary?v=rs17315097	rs17315097	rs17315097	7	0.98	0.02	0	0	7.9e-05	0.54	-0.22	0.04	A	G	0.07	http://www.ncbi.nlm.nih.gov/sites/entrez?Db=gene&Cmd=ShowDetailView&TermToSearch=10135&ordinalpos=1&itool=EntrezSystem2.PEntrez.Gene.Gene_ResultsPanel.Gene_RVDocSum	PBEF1	PBEF1	31	http://www.ncbi.nlm.nih.gov/sites/entrez?Db=gene&Cmd=ShowDetailView&TermToSearch=6856&ordinalpos=1&itool=EntrezSystem2.PEntrez.Gene.Gene_ResultsPanel.Gene_RVDocSum	SYPL1	SYPL1	203	http://www.ncbi.nlm.nih.gov/sites/entrez?Db=gene&Cmd=ShowDetailView&TermToSearch=222256&ordinalpos=1&itool=EntrezSystem2.PEntrez.Gene.Gene_ResultsPanel.Gene_RVDocSum	FLJ23834	FLJ23834	282	2.4	0.6	1.8	-0.1	0.015	0.00017	0.98	-0.3	-0.3	-0.2	-0.1	0.69	0.9	0.47
http://www.ensembl.org/Homo_sapiens/Variation/Summary?v=rs2519679	rs2519679	rs2519679	7	0.98	0.01	0	0	0.00013	0.51	-0.2	0.03	G	A	0.07	http://www.ncbi.nlm.nih.gov/sites/entrez?Db=gene&Cmd=ShowDetailView&TermToSearch=10135&ordinalpos=1&itool=EntrezSystem2.PEntrez.Gene.Gene_ResultsPanel.Gene_RVDocSum	PBEF1	PBEF1	63	http://www.ncbi.nlm.nih.gov/sites/entrez?Db=gene&Cmd=ShowDetailView&TermToSearch=6856&ordinalpos=1&itool=EntrezSystem2.PEntrez.Gene.Gene_ResultsPanel.Gene_RVDocSum	SYPL1	SYPL1	236	http://www.ncbi.nlm.nih.gov/sites/entrez?Db=gene&Cmd=ShowDetailView&TermToSearch=730026&ordinalpos=1&itool=EntrezSystem2.PEntrez.Gene.Gene_ResultsPanel.Gene_RVDocSum	LOC730026	LOC730026	283	2.2	0.7	1.5	-0.1	0.011	0.00046	0.98	-0.3	-0.3	-0.2	-0.1	0.72	0.67	0.65
http://www.ensembl.org/Homo_sapiens/Variation/Summary?v=rs2519676	rs2519676	rs2519676	7	0.98	0.02	0	0	0.00012	0.5	-0.2	0.04	T	A	0.07	http://www.ncbi.nlm.nih.gov/sites/entrez?Db=gene&Cmd=ShowDetailView&TermToSearch=10135&ordinalpos=1&itool=EntrezSystem2.PEntrez.Gene.Gene_ResultsPanel.Gene_RVDocSum	PBEF1	PBEF1	64	http://www.ncbi.nlm.nih.gov/sites/entrez?Db=gene&Cmd=ShowDetailView&TermToSearch=6856&ordinalpos=1&itool=EntrezSystem2.PEntrez.Gene.Gene_ResultsPanel.Gene_RVDocSum	SYPL1	SYPL1	236	http://www.ncbi.nlm.nih.gov/sites/entrez?Db=gene&Cmd=ShowDetailView&TermToSearch=730026&ordinalpos=1&itool=EntrezSystem2.PEntrez.Gene.Gene_ResultsPanel.Gene_RVDocSum	LOC730026	LOC730026	283	2.2	0.7	1.5	-0.1	0.011	0.00047	0.98	-0.3	-0.3	-0.2	-0.1	0.71	0.66	0.65
http://www.ensembl.org/Homo_sapiens/Variation/Summary?v=rs2704938	rs2704938	rs2704938	7	0.98	0.01	0	0	0.00013	0.5	-0.2	0.04	T	C	0.07	http://www.ncbi.nlm.nih.gov/sites/entrez?Db=gene&Cmd=ShowDetailView&TermToSearch=10135&ordinalpos=1&itool=EntrezSystem2.PEntrez.Gene.Gene_ResultsPanel.Gene_RVDocSum	PBEF1	PBEF1	64	http://www.ncbi.nlm.nih.gov/sites/entrez?Db=gene&Cmd=ShowDetailView&TermToSearch=6856&ordinalpos=1&itool=EntrezSystem2.PEntrez.Gene.Gene_ResultsPanel.Gene_RVDocSum	SYPL1	SYPL1	236	http://www.ncbi.nlm.nih.gov/sites/entrez?Db=gene&Cmd=ShowDetailView&TermToSearch=730026&ordinalpos=1&itool=EntrezSystem2.PEntrez.Gene.Gene_ResultsPanel.Gene_RVDocSum	LOC730026	LOC730026	283	2.2	0.7	1.5	-0.1	0.011	0.00056	0.98	-0.3	-0.3	-0.2	-0.1	0.72	0.63	0.68
http://www.ensembl.org/Homo_sapiens/Variation/Summary?v=rs2214004	rs2214004	rs2214004	7	0.98	0.02	0	0	0.00013	0.53	-0.2	0.03	A	G	0.07	http://www.ncbi.nlm.nih.gov/sites/entrez?Db=gene&Cmd=ShowDetailView&TermToSearch=10135&ordinalpos=1&itool=EntrezSystem2.PEntrez.Gene.Gene_ResultsPanel.Gene_RVDocSum	PBEF1	PBEF1	68	http://www.ncbi.nlm.nih.gov/sites/entrez?Db=gene&Cmd=ShowDetailView&TermToSearch=6856&ordinalpos=1&itool=EntrezSystem2.PEntrez.Gene.Gene_ResultsPanel.Gene_RVDocSum	SYPL1	SYPL1	240	http://www.ncbi.nlm.nih.gov/sites/entrez?Db=gene&Cmd=ShowDetailView&TermToSearch=730026&ordinalpos=1&itool=EntrezSystem2.PEntrez.Gene.Gene_ResultsPanel.Gene_RVDocSum	LOC730026	LOC730026	279	2.2	0.7	1.5	-0.1	0.01	0.00053	0.99	-0.3	-0.3	-0.2	-0.1	0.73	0.62	0.75
http://www.ensembl.org/Homo_sapiens/Variation/Summary?v=rs2705011	rs2705011	rs2705011	7	0.98	0.02	0	0	0.0001	0.55	-0.21	0.03	T	C	0.06	http://www.ncbi.nlm.nih.gov/sites/entrez?Db=gene&Cmd=ShowDetailView&TermToSearch=10135&ordinalpos=1&itool=EntrezSystem2.PEntrez.Gene.Gene_ResultsPanel.Gene_RVDocSum	PBEF1	PBEF1	73	http://www.ncbi.nlm.nih.gov/sites/entrez?Db=gene&Cmd=ShowDetailView&TermToSearch=6856&ordinalpos=1&itool=EntrezSystem2.PEntrez.Gene.Gene_ResultsPanel.Gene_RVDocSum	SYPL1	SYPL1	246	http://www.ncbi.nlm.nih.gov/sites/entrez?Db=gene&Cmd=ShowDetailView&TermToSearch=730026&ordinalpos=1&itool=EntrezSystem2.PEntrez.Gene.Gene_ResultsPanel.Gene_RVDocSum	LOC730026	LOC730026	273	2.3	0.8	1.5	-0.1	0.0093	0.0005	0.96	-0.3	-0.3	-0.2	-0.1	0.71	0.59	0.92
http://www.ensembl.org/Homo_sapiens/Variation/Summary?v=rs2705001	rs2705001	rs2705001	7	0.98	0.02	0	0	9.6e-05	0.55	-0.21	0.03	G	A	0.06	http://www.ncbi.nlm.nih.gov/sites/entrez?Db=gene&Cmd=ShowDetailView&TermToSearch=10135&ordinalpos=1&itool=EntrezSystem2.PEntrez.Gene.Gene_ResultsPanel.Gene_RVDocSum	PBEF1	PBEF1	80	http://www.ncbi.nlm.nih.gov/sites/entrez?Db=gene&Cmd=ShowDetailView&TermToSearch=6856&ordinalpos=1&itool=EntrezSystem2.PEntrez.Gene.Gene_ResultsPanel.Gene_RVDocSum	SYPL1	SYPL1	253	http://www.ncbi.nlm.nih.gov/sites/entrez?Db=gene&Cmd=ShowDetailView&TermToSearch=730026&ordinalpos=1&itool=EntrezSystem2.PEntrez.Gene.Gene_ResultsPanel.Gene_RVDocSum	LOC730026	LOC730026	266	2.3	0.8	1.5	-0.1	0.0094	0.00046	0.94	-0.3	-0.3	-0.2	-0.1	0.7	0.57	1
http://www.ensembl.org/Homo_sapiens/Variation/Summary?v=rs4731416	rs4731416	rs4731416	7	0.99	0.01	0	0	0.00016	0.36	-0.21	0.05	A	G	0.09	http://www.ncbi.nlm.nih.gov/sites/entrez?Db=gene&Cmd=ShowDetailView&TermToSearch=406917&ordinalpos=1&itool=EntrezSystem2.PEntrez.Gene.Gene_ResultsPanel.Gene_RVDocSum	MIRN129-1	MIRN129-1	4	http://www.ncbi.nlm.nih.gov/sites/entrez?Db=gene&Cmd=ShowDetailView&TermToSearch=3952&ordinalpos=1&itool=EntrezSystem2.PEntrez.Gene.Gene_ResultsPanel.Gene_RVDocSum	LEP	LEP	37	http://www.ncbi.nlm.nih.gov/sites/entrez?Db=gene&Cmd=ShowDetailView&TermToSearch=730147&ordinalpos=1&itool=EntrezSystem2.PEntrez.Gene.Gene_ResultsPanel.Gene_RVDocSum	LOC730147	LOC730147	96	2.1	0	0.2	1.6	0.17	0.071	0.00034	-0.2	-0.1	-0.2	-0.2	0.75	0.35	0.62
http://www.ensembl.org/Homo_sapiens/Variation/Summary?v=rs11243321	rs11243321	rs11243321	7	0.99	0.01	0	0	0.00017	0.12	0.16	-0.06	C	G	0.11	http://www.ncbi.nlm.nih.gov/sites/entrez?Db=gene&Cmd=ShowDetailView&TermToSearch=1804&ordinalpos=1&itool=EntrezSystem2.PEntrez.Gene.Gene_ResultsPanel.Gene_RVDocSum	DPP6	DPP6	0	http://www.ncbi.nlm.nih.gov/sites/entrez?Db=gene&Cmd=ShowDetailView&TermToSearch=22976&ordinalpos=1&itool=EntrezSystem2.PEntrez.Gene.Gene_ResultsPanel.Gene_RVDocSum	PAXIP1	PAXIP1	103	http://www.ncbi.nlm.nih.gov/sites/entrez?Db=gene&Cmd=ShowDetailView&TermToSearch=3361&ordinalpos=1&itool=EntrezSystem2.PEntrez.Gene.Gene_ResultsPanel.Gene_RVDocSum	HTR5A	HTR5A	230	2.1	1	0	0.4	0.0041	0.17	0.021	0	-0.1	-0.1	-0.2	0.18	0.29	0.97
http://www.ensembl.org/Homo_sapiens/Variation/Summary?v=rs11784779	rs11784779	rs11784779	8	0.99	0.01	0	0	0.0002	0.88	0.09	0	T	C	0.41	http://www.ncbi.nlm.nih.gov/sites/entrez?Db=gene&Cmd=ShowDetailView&TermToSearch=4482&ordinalpos=1&itool=EntrezSystem2.PEntrez.Gene.Gene_ResultsPanel.Gene_RVDocSum	MSRA	MSRA	0	http://www.ncbi.nlm.nih.gov/sites/entrez?Db=gene&Cmd=ShowDetailView&TermToSearch=728868&ordinalpos=1&itool=EntrezSystem2.PEntrez.Gene.Gene_ResultsPanel.Gene_RVDocSum	LOC728868	LOC728868	136	http://www.ncbi.nlm.nih.gov/sites/entrez?Db=gene&Cmd=ShowDetailView&TermToSearch=346702&ordinalpos=1&itool=EntrezSystem2.PEntrez.Gene.Gene_ResultsPanel.Gene_RVDocSum	LOC346702	LOC346702	208	2	0.8	0	0.5	0.0069	0.13	0.018	-0.7	-0.5	-0.1	-0.3	0.53	0.14	0.46
http://www.ensembl.org/Homo_sapiens/Variation/Summary?v=rs4831499	rs4831499	rs4831499	8	0.99	0.01	0	0	0.00017	0.56	0.11	-0.02	C	T	0.28	http://www.ncbi.nlm.nih.gov/sites/entrez?Db=gene&Cmd=ShowDetailView&TermToSearch=137868&ordinalpos=1&itool=EntrezSystem2.PEntrez.Gene.Gene_ResultsPanel.Gene_RVDocSum	SGCZ	SGCZ	220	http://www.ncbi.nlm.nih.gov/sites/entrez?Db=gene&Cmd=ShowDetailView&TermToSearch=157773&ordinalpos=1&itool=EntrezSystem2.PEntrez.Gene.Gene_ResultsPanel.Gene_RVDocSum	C8orf48	C8orf48	301	http://www.ncbi.nlm.nih.gov/sites/entrez?Db=gene&Cmd=ShowDetailView&TermToSearch=10395&ordinalpos=1&itool=EntrezSystem2.PEntrez.Gene.Gene_ResultsPanel.Gene_RVDocSum	DLC1	DLC1	355	2.2	0.7	0.4	0	0.0098	0.022	0.13	-0.6	-0.5	-0.1	-0.2	0.85	0.17	0.38
http://www.ensembl.org/Homo_sapiens/Variation/Summary?v=rs7818612	rs7818612	rs7818612	8	0.96	0.04	0	0	4.7e-05	0.57	0.13	-0.02	G	A	0.34	http://www.ncbi.nlm.nih.gov/sites/entrez?Db=gene&Cmd=ShowDetailView&TermToSearch=137868&ordinalpos=1&itool=EntrezSystem2.PEntrez.Gene.Gene_ResultsPanel.Gene_RVDocSum	SGCZ	SGCZ	220	http://www.ncbi.nlm.nih.gov/sites/entrez?Db=gene&Cmd=ShowDetailView&TermToSearch=157773&ordinalpos=1&itool=EntrezSystem2.PEntrez.Gene.Gene_ResultsPanel.Gene_RVDocSum	C8orf48	C8orf48	301	http://www.ncbi.nlm.nih.gov/sites/entrez?Db=gene&Cmd=ShowDetailView&TermToSearch=10395&ordinalpos=1&itool=EntrezSystem2.PEntrez.Gene.Gene_ResultsPanel.Gene_RVDocSum	DLC1	DLC1	355	2.7	0.9	0.6	0.2	0.0065	0.014	0.072	-0.6	-0.5	-0.1	-0.2	0.95	0.16	0.48
http://www.ensembl.org/Homo_sapiens/Variation/Summary?v=rs11779478	rs11779478	rs11779478	8	0.97	0.03	0	0	6.8e-05	0.7	0.15	-0.01	G	A	0.26	http://www.ncbi.nlm.nih.gov/sites/entrez?Db=gene&Cmd=ShowDetailView&TermToSearch=137868&ordinalpos=1&itool=EntrezSystem2.PEntrez.Gene.Gene_ResultsPanel.Gene_RVDocSum	SGCZ	SGCZ	217	http://www.ncbi.nlm.nih.gov/sites/entrez?Db=gene&Cmd=ShowDetailView&TermToSearch=157773&ordinalpos=1&itool=EntrezSystem2.PEntrez.Gene.Gene_ResultsPanel.Gene_RVDocSum	C8orf48	C8orf48	304	http://www.ncbi.nlm.nih.gov/sites/entrez?Db=gene&Cmd=ShowDetailView&TermToSearch=10395&ordinalpos=1&itool=EntrezSystem2.PEntrez.Gene.Gene_ResultsPanel.Gene_RVDocSum	DLC1	DLC1	358	2.5	0.9	0.7	0	0.006	0.011	0.16	-0.5	-0.4	-0.1	-0.2	0.99	0.24	0.52
http://www.ensembl.org/Homo_sapiens/Variation/Summary?v=rs9692793	rs9692793	rs9692793	8	0.99	0.01	0	0	0.00014	0.38	0.12	-0.03	A	T	0.38	http://www.ncbi.nlm.nih.gov/sites/entrez?Db=gene&Cmd=ShowDetailView&TermToSearch=137868&ordinalpos=1&itool=EntrezSystem2.PEntrez.Gene.Gene_ResultsPanel.Gene_RVDocSum	SGCZ	SGCZ	216	http://www.ncbi.nlm.nih.gov/sites/entrez?Db=gene&Cmd=ShowDetailView&TermToSearch=157773&ordinalpos=1&itool=EntrezSystem2.PEntrez.Gene.Gene_ResultsPanel.Gene_RVDocSum	C8orf48	C8orf48	305	http://www.ncbi.nlm.nih.gov/sites/entrez?Db=gene&Cmd=ShowDetailView&TermToSearch=10395&ordinalpos=1&itool=EntrezSystem2.PEntrez.Gene.Gene_ResultsPanel.Gene_RVDocSum	DLC1	DLC1	359	2.2	0.6	0.4	0.2	0.014	0.023	0.06	-0.4	-0.4	0.1	-0.3	0.99	0.079	0.68
http://www.ensembl.org/Homo_sapiens/Variation/Summary?v=rs11781688	rs11781688	rs11781688	8	0.99	0.01	0	0	0.00023	0.5	0.1	-0.02	G	A	0.25	http://www.ncbi.nlm.nih.gov/sites/entrez?Db=gene&Cmd=ShowDetailView&TermToSearch=137868&ordinalpos=1&itool=EntrezSystem2.PEntrez.Gene.Gene_ResultsPanel.Gene_RVDocSum	SGCZ	SGCZ	214	http://www.ncbi.nlm.nih.gov/sites/entrez?Db=gene&Cmd=ShowDetailView&TermToSearch=157773&ordinalpos=1&itool=EntrezSystem2.PEntrez.Gene.Gene_ResultsPanel.Gene_RVDocSum	C8orf48	C8orf48	307	http://www.ncbi.nlm.nih.gov/sites/entrez?Db=gene&Cmd=ShowDetailView&TermToSearch=10395&ordinalpos=1&itool=EntrezSystem2.PEntrez.Gene.Gene_ResultsPanel.Gene_RVDocSum	DLC1	DLC1	361	2	0.6	0.3	0.1	0.013	0.033	0.083	-0.6	-0.5	0.2	-0.1	0.89	0.057	0.22
http://www.ensembl.org/Homo_sapiens/Variation/Summary?v=rs9643881	rs9643881	rs9643881	8	0.99	0.01	0	0	0.0024	0.039	-0.07	0.05	A	G	0.45	http://www.ncbi.nlm.nih.gov/sites/entrez?Db=gene&Cmd=ShowDetailView&TermToSearch=727725&ordinalpos=1&itool=EntrezSystem2.PEntrez.Gene.Gene_ResultsPanel.Gene_RVDocSum	LOC727725	LOC727725	0	http://www.ncbi.nlm.nih.gov/sites/entrez?Db=gene&Cmd=ShowDetailView&TermToSearch=79698&ordinalpos=1&itool=EntrezSystem2.PEntrez.Gene.Gene_ResultsPanel.Gene_RVDocSum	ZMAT4	ZMAT4	87	http://www.ncbi.nlm.nih.gov/sites/entrez?Db=gene&Cmd=ShowDetailView&TermToSearch=6422&ordinalpos=1&itool=EntrezSystem2.PEntrez.Gene.Gene_ResultsPanel.Gene_RVDocSum	SFRP1	SFRP1	277	2	1.5	-0.4	0.3	0.009	0.48	0.049	0.1	-0.5	-0.1	0	0.4	0.14	0.14
http://www.ensembl.org/Homo_sapiens/Variation/Summary?v=rs10958644	rs10958644	rs10958644	8	0.98	0.02	0	0	0.00093	0.058	-0.08	0.05	C	T	0.47	http://www.ncbi.nlm.nih.gov/sites/entrez?Db=gene&Cmd=ShowDetailView&TermToSearch=727725&ordinalpos=1&itool=EntrezSystem2.PEntrez.Gene.Gene_ResultsPanel.Gene_RVDocSum	LOC727725	LOC727725	0	http://www.ncbi.nlm.nih.gov/sites/entrez?Db=gene&Cmd=ShowDetailView&TermToSearch=79698&ordinalpos=1&itool=EntrezSystem2.PEntrez.Gene.Gene_ResultsPanel.Gene_RVDocSum	ZMAT4	ZMAT4	88	http://www.ncbi.nlm.nih.gov/sites/entrez?Db=gene&Cmd=ShowDetailView&TermToSearch=6422&ordinalpos=1&itool=EntrezSystem2.PEntrez.Gene.Gene_ResultsPanel.Gene_RVDocSum	SFRP1	SFRP1	276	2.3	1.5	-0.4	0.5	0.0067	0.36	0.026	0	-0.5	-0.1	0.1	0.62	0.15	0.092
http://www.ensembl.org/Homo_sapiens/Variation/Summary?v=rs3847182	rs3847182	rs3847182	8	0.99	0.01	0	0	0.0015	0.095	-0.08	0.04	C	T	0.5	http://www.ncbi.nlm.nih.gov/sites/entrez?Db=gene&Cmd=ShowDetailView&TermToSearch=727725&ordinalpos=1&itool=EntrezSystem2.PEntrez.Gene.Gene_ResultsPanel.Gene_RVDocSum	LOC727725	LOC727725	0	http://www.ncbi.nlm.nih.gov/sites/entrez?Db=gene&Cmd=ShowDetailView&TermToSearch=79698&ordinalpos=1&itool=EntrezSystem2.PEntrez.Gene.Gene_ResultsPanel.Gene_RVDocSum	ZMAT4	ZMAT4	91	http://www.ncbi.nlm.nih.gov/sites/entrez?Db=gene&Cmd=ShowDetailView&TermToSearch=6422&ordinalpos=1&itool=EntrezSystem2.PEntrez.Gene.Gene_ResultsPanel.Gene_RVDocSum	SFRP1	SFRP1	274	2.2	1.7	-0.4	0.4	0.005	0.49	0.034	-0.2	-0.5	-0.1	-0.1	0.86	0.12	0.18
http://www.ensembl.org/Homo_sapiens/Variation/Summary?v=rs3847183	rs3847183	rs3847183	8	0.98	0.02	0	0	0.0016	0.079	-0.08	0.04	G	A	0.44	http://www.ncbi.nlm.nih.gov/sites/entrez?Db=gene&Cmd=ShowDetailView&TermToSearch=727725&ordinalpos=1&itool=EntrezSystem2.PEntrez.Gene.Gene_ResultsPanel.Gene_RVDocSum	LOC727725	LOC727725	0	http://www.ncbi.nlm.nih.gov/sites/entrez?Db=gene&Cmd=ShowDetailView&TermToSearch=79698&ordinalpos=1&itool=EntrezSystem2.PEntrez.Gene.Gene_ResultsPanel.Gene_RVDocSum	ZMAT4	ZMAT4	91	http://www.ncbi.nlm.nih.gov/sites/entrez?Db=gene&Cmd=ShowDetailView&TermToSearch=6422&ordinalpos=1&itool=EntrezSystem2.PEntrez.Gene.Gene_ResultsPanel.Gene_RVDocSum	SFRP1	SFRP1	273	2.3	1.9	-0.4	0.4	0.0062	0.45	0.038	-0.2	-0.5	-0.2	0	0.63	0.18	0.14
http://www.ensembl.org/Homo_sapiens/Variation/Summary?v=rs3857965	rs3857965	rs3857965	8	0.98	0.02	0	0	0.0014	0.073	-0.08	0.04	A	G	0.44	http://www.ncbi.nlm.nih.gov/sites/entrez?Db=gene&Cmd=ShowDetailView&TermToSearch=727725&ordinalpos=1&itool=EntrezSystem2.PEntrez.Gene.Gene_ResultsPanel.Gene_RVDocSum	LOC727725	LOC727725	0	http://www.ncbi.nlm.nih.gov/sites/entrez?Db=gene&Cmd=ShowDetailView&TermToSearch=79698&ordinalpos=1&itool=EntrezSystem2.PEntrez.Gene.Gene_ResultsPanel.Gene_RVDocSum	ZMAT4	ZMAT4	91	http://www.ncbi.nlm.nih.gov/sites/entrez?Db=gene&Cmd=ShowDetailView&TermToSearch=6422&ordinalpos=1&itool=EntrezSystem2.PEntrez.Gene.Gene_ResultsPanel.Gene_RVDocSum	SFRP1	SFRP1	273	2.3	1.9	-0.4	0.4	0.0062	0.43	0.037	-0.1	-0.5	-0.2	0	0.63	0.16	0.13
http://www.ensembl.org/Homo_sapiens/Variation/Summary?v=rs7015276	rs7015276	rs7015276	8	0.97	0.03	0	0	0.00075	0.089	-0.08	0.04	G	A	0.47	http://www.ncbi.nlm.nih.gov/sites/entrez?Db=gene&Cmd=ShowDetailView&TermToSearch=727725&ordinalpos=1&itool=EntrezSystem2.PEntrez.Gene.Gene_ResultsPanel.Gene_RVDocSum	LOC727725	LOC727725	0	http://www.ncbi.nlm.nih.gov/sites/entrez?Db=gene&Cmd=ShowDetailView&TermToSearch=79698&ordinalpos=1&itool=EntrezSystem2.PEntrez.Gene.Gene_ResultsPanel.Gene_RVDocSum	ZMAT4	ZMAT4	92	http://www.ncbi.nlm.nih.gov/sites/entrez?Db=gene&Cmd=ShowDetailView&TermToSearch=6422&ordinalpos=1&itool=EntrezSystem2.PEntrez.Gene.Gene_ResultsPanel.Gene_RVDocSum	SFRP1	SFRP1	272	2.5	1.6	-0.4	0.6	0.0063	0.35	0.021	-0.2	-0.5	-0.2	0.1	0.81	0.17	0.088
http://www.ensembl.org/Homo_sapiens/Variation/Summary?v=rs10504038	rs10504038	rs10504038	8	0.98	0.02	0	0	0.0013	0.46	-0.08	0.02	A	G	0.42	http://www.ncbi.nlm.nih.gov/sites/entrez?Db=gene&Cmd=ShowDetailView&TermToSearch=727725&ordinalpos=1&itool=EntrezSystem2.PEntrez.Gene.Gene_ResultsPanel.Gene_RVDocSum	LOC727725	LOC727725	0	http://www.ncbi.nlm.nih.gov/sites/entrez?Db=gene&Cmd=ShowDetailView&TermToSearch=79698&ordinalpos=1&itool=EntrezSystem2.PEntrez.Gene.Gene_ResultsPanel.Gene_RVDocSum	ZMAT4	ZMAT4	113	http://www.ncbi.nlm.nih.gov/sites/entrez?Db=gene&Cmd=ShowDetailView&TermToSearch=6422&ordinalpos=1&itool=EntrezSystem2.PEntrez.Gene.Gene_ResultsPanel.Gene_RVDocSum	SFRP1	SFRP1	251	2.2	2.2	-0.4	0.5	0.0062	0.6	0.017	-0.6	-0.6	-0.4	-0.1	0.8	0.45	0.19
http://www.ensembl.org/Homo_sapiens/Variation/Summary?v=rs1481278	rs1481278	rs1481278	8	0.99	0.01	0	0	0.00016	0.61	0.17	0.02	C	T	0.07	http://www.ncbi.nlm.nih.gov/sites/entrez?Db=gene&Cmd=ShowDetailView&TermToSearch=23213&ordinalpos=1&itool=EntrezSystem2.PEntrez.Gene.Gene_ResultsPanel.Gene_RVDocSum	SULF1	SULF1	73	http://www.ncbi.nlm.nih.gov/sites/entrez?Db=gene&Cmd=ShowDetailView&TermToSearch=81796&ordinalpos=1&itool=EntrezSystem2.PEntrez.Gene.Gene_ResultsPanel.Gene_RVDocSum	SLCO5A1	SLCO5A1	279	http://www.ncbi.nlm.nih.gov/sites/entrez?Db=gene&Cmd=ShowDetailView&TermToSearch=116328&ordinalpos=1&itool=EntrezSystem2.PEntrez.Gene.Gene_ResultsPanel.Gene_RVDocSum	C8orf34	C8orf34	575	2.1	0.5	1	0	0.02	0.0036	0.26	-0.4	-0.3	-0.2	-0.1	0.65	0.53	0.62
http://www.ensembl.org/Homo_sapiens/Variation/Summary?v=rs2728436	rs2728436	rs2728436	8	0.98	0.01	0	0	0.00013	0.8	-0.15	-0.01	T	C	0.46	http://www.ncbi.nlm.nih.gov/sites/entrez?Db=gene&Cmd=ShowDetailView&TermToSearch=79776&ordinalpos=1&itool=EntrezSystem2.PEntrez.Gene.Gene_ResultsPanel.Gene_RVDocSum	ZFHX4	ZFHX4	0	http://www.ncbi.nlm.nih.gov/sites/entrez?Db=gene&Cmd=ShowDetailView&TermToSearch=137290&ordinalpos=1&itool=EntrezSystem2.PEntrez.Gene.Gene_ResultsPanel.Gene_RVDocSum	MRPL9P1	MRPL9P1	182	http://www.ncbi.nlm.nih.gov/sites/entrez?Db=gene&Cmd=ShowDetailView&TermToSearch=5828&ordinalpos=1&itool=EntrezSystem2.PEntrez.Gene.Gene_ResultsPanel.Gene_RVDocSum	PXMP3	PXMP3	197	2.2	-0.1	1	0.4	0.21	0.0031	0.026	-0.5	-0.2	-0.4	-0.2	0.46	0.64	0.38
http://www.ensembl.org/Homo_sapiens/Variation/Summary?v=rs10755894	rs10755894	rs10755894	8	0.98	0.02	0	0	0.00011	0.51	0.2	-0.03	C	T	0.07	http://www.ncbi.nlm.nih.gov/sites/entrez?Db=gene&Cmd=ShowDetailView&TermToSearch=643228&ordinalpos=1&itool=EntrezSystem2.PEntrez.Gene.Gene_ResultsPanel.Gene_RVDocSum	LOC643228	LOC643228	146	http://www.ncbi.nlm.nih.gov/sites/entrez?Db=gene&Cmd=ShowDetailView&TermToSearch=392255&ordinalpos=1&itool=EntrezSystem2.PEntrez.Gene.Gene_ResultsPanel.Gene_RVDocSum	GDF6	GDF6	248	http://www.ncbi.nlm.nih.gov/sites/entrez?Db=gene&Cmd=ShowDetailView&TermToSearch=7381&ordinalpos=1&itool=EntrezSystem2.PEntrez.Gene.Gene_ResultsPanel.Gene_RVDocSum	UQCRB	UQCRB	336	2.2	0.2	1.8	-0.1	0.07	0.00027	0.29	-0.3	-0.3	-0.2	-0.2	0.68	0.72	0.71
http://www.ensembl.org/Homo_sapiens/Variation/Summary?v=rs12677904	rs12677904	rs12677904	8	0.99	0.01	0	0	0.0002	0.6	-0.14	0.02	C	T	0.19	http://www.ncbi.nlm.nih.gov/sites/entrez?Db=gene&Cmd=ShowDetailView&TermToSearch=728795&ordinalpos=1&itool=EntrezSystem2.PEntrez.Gene.Gene_ResultsPanel.Gene_RVDocSum	LOC728795	LOC728795	9	http://www.ncbi.nlm.nih.gov/sites/entrez?Db=gene&Cmd=ShowDetailView&TermToSearch=114788&ordinalpos=1&itool=EntrezSystem2.PEntrez.Gene.Gene_ResultsPanel.Gene_RVDocSum	CSMD3	CSMD3	872	http://www.ncbi.nlm.nih.gov/sites/entrez?Db=gene&Cmd=ShowDetailView&TermToSearch=NA&ordinalpos=1&itool=EntrezSystem2.PEntrez.Gene.Gene_ResultsPanel.Gene_RVDocSum	NA	NA	NA	2	1.4	-0.1	0.2	0.0011	0.23	0.068	-0.4	-0.1	-0.2	-0.2	0.14	0.38	0.95
http://www.ensembl.org/Homo_sapiens/Variation/Summary?v=rs2980856	rs2980856	rs2980856	8	0.97	0.03	0	0	5.3e-05	0.51	-0.09	-0.02	G	C	0.45	http://www.ncbi.nlm.nih.gov/sites/entrez?Db=gene&Cmd=ShowDetailView&TermToSearch=10221&ordinalpos=1&itool=EntrezSystem2.PEntrez.Gene.Gene_ResultsPanel.Gene_RVDocSum	TRIB1	TRIB1	26	http://www.ncbi.nlm.nih.gov/sites/entrez?Db=gene&Cmd=ShowDetailView&TermToSearch=286053&ordinalpos=1&itool=EntrezSystem2.PEntrez.Gene.Gene_ResultsPanel.Gene_RVDocSum	NSMCE2	NSMCE2	97	http://www.ncbi.nlm.nih.gov/sites/entrez?Db=gene&Cmd=ShowDetailView&TermToSearch=9897&ordinalpos=1&itool=EntrezSystem2.PEntrez.Gene.Gene_ResultsPanel.Gene_RVDocSum	KIAA0196	KIAA0196	380	2.5	1.6	0.5	-0.3	0.0011	0.019	0.38	-0.6	-0.4	-0.5	-0.3	0.4	0.93	1
http://www.ensembl.org/Homo_sapiens/Variation/Summary?v=rs2980855	rs2980855	rs2980855	8	0.97	0.03	0	0	6.1e-05	0.47	-0.09	-0.02	C	T	0.45	http://www.ncbi.nlm.nih.gov/sites/entrez?Db=gene&Cmd=ShowDetailView&TermToSearch=10221&ordinalpos=1&itool=EntrezSystem2.PEntrez.Gene.Gene_ResultsPanel.Gene_RVDocSum	TRIB1	TRIB1	27	http://www.ncbi.nlm.nih.gov/sites/entrez?Db=gene&Cmd=ShowDetailView&TermToSearch=286053&ordinalpos=1&itool=EntrezSystem2.PEntrez.Gene.Gene_ResultsPanel.Gene_RVDocSum	NSMCE2	NSMCE2	98	http://www.ncbi.nlm.nih.gov/sites/entrez?Db=gene&Cmd=ShowDetailView&TermToSearch=9897&ordinalpos=1&itool=EntrezSystem2.PEntrez.Gene.Gene_ResultsPanel.Gene_RVDocSum	KIAA0196	KIAA0196	381	2.5	1.5	0.5	-0.2	0.0013	0.02	0.37	-0.5	-0.4	-0.5	-0.3	0.36	0.91	1
http://www.ensembl.org/Homo_sapiens/Variation/Summary?v=rs2980854	rs2980854	rs2980854	8	0.97	0.03	0	0	6.1e-05	0.47	-0.09	-0.02	T	C	0.45	http://www.ncbi.nlm.nih.gov/sites/entrez?Db=gene&Cmd=ShowDetailView&TermToSearch=10221&ordinalpos=1&itool=EntrezSystem2.PEntrez.Gene.Gene_ResultsPanel.Gene_RVDocSum	TRIB1	TRIB1	27	http://www.ncbi.nlm.nih.gov/sites/entrez?Db=gene&Cmd=ShowDetailView&TermToSearch=286053&ordinalpos=1&itool=EntrezSystem2.PEntrez.Gene.Gene_ResultsPanel.Gene_RVDocSum	NSMCE2	NSMCE2	98	http://www.ncbi.nlm.nih.gov/sites/entrez?Db=gene&Cmd=ShowDetailView&TermToSearch=9897&ordinalpos=1&itool=EntrezSystem2.PEntrez.Gene.Gene_ResultsPanel.Gene_RVDocSum	KIAA0196	KIAA0196	381	2.5	1.5	0.5	-0.2	0.0013	0.02	0.36	-0.5	-0.4	-0.5	-0.3	0.36	0.92	1
http://www.ensembl.org/Homo_sapiens/Variation/Summary?v=rs2954019	rs2954019	rs2954019	8	0.97	0.03	0	0	6.3e-05	0.48	-0.09	-0.02	A	G	0.45	http://www.ncbi.nlm.nih.gov/sites/entrez?Db=gene&Cmd=ShowDetailView&TermToSearch=10221&ordinalpos=1&itool=EntrezSystem2.PEntrez.Gene.Gene_ResultsPanel.Gene_RVDocSum	TRIB1	TRIB1	27	http://www.ncbi.nlm.nih.gov/sites/entrez?Db=gene&Cmd=ShowDetailView&TermToSearch=286053&ordinalpos=1&itool=EntrezSystem2.PEntrez.Gene.Gene_ResultsPanel.Gene_RVDocSum	NSMCE2	NSMCE2	98	http://www.ncbi.nlm.nih.gov/sites/entrez?Db=gene&Cmd=ShowDetailView&TermToSearch=9897&ordinalpos=1&itool=EntrezSystem2.PEntrez.Gene.Gene_ResultsPanel.Gene_RVDocSum	KIAA0196	KIAA0196	382	2.5	1.5	0.4	-0.2	0.0013	0.021	0.37	-0.5	-0.4	-0.5	-0.3	0.36	0.93	1
http://www.ensembl.org/Homo_sapiens/Variation/Summary?v=rs2001945	rs2001945	rs2001945	8	0.97	0.03	0	0	4.5e-05	0.15	-0.09	-0.03	C	G	0.5	http://www.ncbi.nlm.nih.gov/sites/entrez?Db=gene&Cmd=ShowDetailView&TermToSearch=10221&ordinalpos=1&itool=EntrezSystem2.PEntrez.Gene.Gene_ResultsPanel.Gene_RVDocSum	TRIB1	TRIB1	27	http://www.ncbi.nlm.nih.gov/sites/entrez?Db=gene&Cmd=ShowDetailView&TermToSearch=286053&ordinalpos=1&itool=EntrezSystem2.PEntrez.Gene.Gene_ResultsPanel.Gene_RVDocSum	NSMCE2	NSMCE2	99	http://www.ncbi.nlm.nih.gov/sites/entrez?Db=gene&Cmd=ShowDetailView&TermToSearch=9897&ordinalpos=1&itool=EntrezSystem2.PEntrez.Gene.Gene_ResultsPanel.Gene_RVDocSum	KIAA0196	KIAA0196	382	2.5	1.4	0.6	-0.3	0.0012	0.012	0.42	-0.4	-0.3	-0.4	-0.4	0.2	0.44	0.9
http://www.ensembl.org/Homo_sapiens/Variation/Summary?v=rs2980853	rs2980853	rs2980853	8	0.97	0.02	0	0	6.5e-05	0.47	-0.09	-0.02	C	A	0.45	http://www.ncbi.nlm.nih.gov/sites/entrez?Db=gene&Cmd=ShowDetailView&TermToSearch=10221&ordinalpos=1&itool=EntrezSystem2.PEntrez.Gene.Gene_ResultsPanel.Gene_RVDocSum	TRIB1	TRIB1	28	http://www.ncbi.nlm.nih.gov/sites/entrez?Db=gene&Cmd=ShowDetailView&TermToSearch=286053&ordinalpos=1&itool=EntrezSystem2.PEntrez.Gene.Gene_ResultsPanel.Gene_RVDocSum	NSMCE2	NSMCE2	99	http://www.ncbi.nlm.nih.gov/sites/entrez?Db=gene&Cmd=ShowDetailView&TermToSearch=9897&ordinalpos=1&itool=EntrezSystem2.PEntrez.Gene.Gene_ResultsPanel.Gene_RVDocSum	KIAA0196	KIAA0196	382	2.4	1.5	0.4	-0.2	0.0013	0.022	0.37	-0.5	-0.4	-0.5	-0.3	0.35	0.93	1
http://www.ensembl.org/Homo_sapiens/Variation/Summary?v=rs2001844	rs2001844	rs2001844	8	0.97	0.02	0	0	6.5e-05	0.47	-0.09	-0.02	G	A	0.45	http://www.ncbi.nlm.nih.gov/sites/entrez?Db=gene&Cmd=ShowDetailView&TermToSearch=10221&ordinalpos=1&itool=EntrezSystem2.PEntrez.Gene.Gene_ResultsPanel.Gene_RVDocSum	TRIB1	TRIB1	28	http://www.ncbi.nlm.nih.gov/sites/entrez?Db=gene&Cmd=ShowDetailView&TermToSearch=286053&ordinalpos=1&itool=EntrezSystem2.PEntrez.Gene.Gene_ResultsPanel.Gene_RVDocSum	NSMCE2	NSMCE2	99	http://www.ncbi.nlm.nih.gov/sites/entrez?Db=gene&Cmd=ShowDetailView&TermToSearch=9897&ordinalpos=1&itool=EntrezSystem2.PEntrez.Gene.Gene_ResultsPanel.Gene_RVDocSum	KIAA0196	KIAA0196	383	2.4	1.5	0.4	-0.2	0.0012	0.022	0.36	-0.5	-0.4	-0.5	-0.3	0.36	0.92	0.99
http://www.ensembl.org/Homo_sapiens/Variation/Summary?v=rs6982636	rs6982636	rs6982636	8	0.98	0.02	0	0	9.4e-05	0.46	-0.09	-0.02	A	G	0.45	http://www.ncbi.nlm.nih.gov/sites/entrez?Db=gene&Cmd=ShowDetailView&TermToSearch=10221&ordinalpos=1&itool=EntrezSystem2.PEntrez.Gene.Gene_ResultsPanel.Gene_RVDocSum	TRIB1	TRIB1	29	http://www.ncbi.nlm.nih.gov/sites/entrez?Db=gene&Cmd=ShowDetailView&TermToSearch=286053&ordinalpos=1&itool=EntrezSystem2.PEntrez.Gene.Gene_ResultsPanel.Gene_RVDocSum	NSMCE2	NSMCE2	100	http://www.ncbi.nlm.nih.gov/sites/entrez?Db=gene&Cmd=ShowDetailView&TermToSearch=9897&ordinalpos=1&itool=EntrezSystem2.PEntrez.Gene.Gene_ResultsPanel.Gene_RVDocSum	KIAA0196	KIAA0196	383	2.3	1.5	0.3	-0.3	0.0012	0.029	0.39	-0.6	-0.4	-0.5	-0.3	0.36	0.91	0.97
http://www.ensembl.org/Homo_sapiens/Variation/Summary?v=rs6982502	rs6982502	rs6982502	8	0.97	0.03	0	0	4.8e-05	0.16	-0.09	-0.03	T	C	0.49	http://www.ncbi.nlm.nih.gov/sites/entrez?Db=gene&Cmd=ShowDetailView&TermToSearch=10221&ordinalpos=1&itool=EntrezSystem2.PEntrez.Gene.Gene_ResultsPanel.Gene_RVDocSum	TRIB1	TRIB1	29	http://www.ncbi.nlm.nih.gov/sites/entrez?Db=gene&Cmd=ShowDetailView&TermToSearch=286053&ordinalpos=1&itool=EntrezSystem2.PEntrez.Gene.Gene_ResultsPanel.Gene_RVDocSum	NSMCE2	NSMCE2	100	http://www.ncbi.nlm.nih.gov/sites/entrez?Db=gene&Cmd=ShowDetailView&TermToSearch=9897&ordinalpos=1&itool=EntrezSystem2.PEntrez.Gene.Gene_ResultsPanel.Gene_RVDocSum	KIAA0196	KIAA0196	383	2.5	1.4	0.6	-0.3	0.0012	0.014	0.41	-0.4	-0.3	-0.4	-0.4	0.21	0.43	0.89
http://www.ensembl.org/Homo_sapiens/Variation/Summary?v=rs2980882	rs2980882	rs2980882	8	0.97	0.03	0	0	5.6e-05	0.47	-0.09	-0.02	G	A	0.46	http://www.ncbi.nlm.nih.gov/sites/entrez?Db=gene&Cmd=ShowDetailView&TermToSearch=10221&ordinalpos=1&itool=EntrezSystem2.PEntrez.Gene.Gene_ResultsPanel.Gene_RVDocSum	TRIB1	TRIB1	30	http://www.ncbi.nlm.nih.gov/sites/entrez?Db=gene&Cmd=ShowDetailView&TermToSearch=286053&ordinalpos=1&itool=EntrezSystem2.PEntrez.Gene.Gene_ResultsPanel.Gene_RVDocSum	NSMCE2	NSMCE2	101	http://www.ncbi.nlm.nih.gov/sites/entrez?Db=gene&Cmd=ShowDetailView&TermToSearch=9897&ordinalpos=1&itool=EntrezSystem2.PEntrez.Gene.Gene_ResultsPanel.Gene_RVDocSum	KIAA0196	KIAA0196	384	2.5	1.5	0.5	-0.2	0.0014	0.017	0.36	-0.5	-0.4	-0.5	-0.3	0.37	0.83	0.94
http://www.ensembl.org/Homo_sapiens/Variation/Summary?v=rs2980875	rs2980875	rs2980875	8	0.97	0.03	0	0	6e-05	0.5	-0.09	-0.02	G	A	0.45	http://www.ncbi.nlm.nih.gov/sites/entrez?Db=gene&Cmd=ShowDetailView&TermToSearch=10221&ordinalpos=1&itool=EntrezSystem2.PEntrez.Gene.Gene_ResultsPanel.Gene_RVDocSum	TRIB1	TRIB1	31	http://www.ncbi.nlm.nih.gov/sites/entrez?Db=gene&Cmd=ShowDetailView&TermToSearch=286053&ordinalpos=1&itool=EntrezSystem2.PEntrez.Gene.Gene_ResultsPanel.Gene_RVDocSum	NSMCE2	NSMCE2	102	http://www.ncbi.nlm.nih.gov/sites/entrez?Db=gene&Cmd=ShowDetailView&TermToSearch=9897&ordinalpos=1&itool=EntrezSystem2.PEntrez.Gene.Gene_ResultsPanel.Gene_RVDocSum	KIAA0196	KIAA0196	386	2.5	1.4	0.5	-0.3	0.0016	0.016	0.37	-0.6	-0.4	-0.5	-0.3	0.4	0.83	0.91
http://www.ensembl.org/Homo_sapiens/Variation/Summary?v=rs2954021	rs2954021	rs2954021	8	0.95	0.05	0	0	2.7e-05	0.28	-0.1	-0.03	G	A	0.49	http://www.ncbi.nlm.nih.gov/sites/entrez?Db=gene&Cmd=ShowDetailView&TermToSearch=10221&ordinalpos=1&itool=EntrezSystem2.PEntrez.Gene.Gene_ResultsPanel.Gene_RVDocSum	TRIB1	TRIB1	31	http://www.ncbi.nlm.nih.gov/sites/entrez?Db=gene&Cmd=ShowDetailView&TermToSearch=286053&ordinalpos=1&itool=EntrezSystem2.PEntrez.Gene.Gene_ResultsPanel.Gene_RVDocSum	NSMCE2	NSMCE2	103	http://www.ncbi.nlm.nih.gov/sites/entrez?Db=gene&Cmd=ShowDetailView&TermToSearch=9897&ordinalpos=1&itool=EntrezSystem2.PEntrez.Gene.Gene_ResultsPanel.Gene_RVDocSum	KIAA0196	KIAA0196	386	2.8	1.6	0.7	-0.3	0.00089	0.01	0.38	-0.5	-0.4	-0.4	-0.4	0.31	0.49	0.94
http://www.ensembl.org/Homo_sapiens/Variation/Summary?v=rs2954022	rs2954022	rs2954022	8	0.97	0.03	0	0	6.1e-05	0.51	-0.09	-0.02	A	C	0.45	http://www.ncbi.nlm.nih.gov/sites/entrez?Db=gene&Cmd=ShowDetailView&TermToSearch=10221&ordinalpos=1&itool=EntrezSystem2.PEntrez.Gene.Gene_ResultsPanel.Gene_RVDocSum	TRIB1	TRIB1	32	http://www.ncbi.nlm.nih.gov/sites/entrez?Db=gene&Cmd=ShowDetailView&TermToSearch=286053&ordinalpos=1&itool=EntrezSystem2.PEntrez.Gene.Gene_ResultsPanel.Gene_RVDocSum	NSMCE2	NSMCE2	103	http://www.ncbi.nlm.nih.gov/sites/entrez?Db=gene&Cmd=ShowDetailView&TermToSearch=9897&ordinalpos=1&itool=EntrezSystem2.PEntrez.Gene.Gene_ResultsPanel.Gene_RVDocSum	KIAA0196	KIAA0196	386	2.5	1.4	0.5	-0.2	0.0015	0.016	0.37	-0.6	-0.4	-0.5	-0.3	0.41	0.83	0.9
http://www.ensembl.org/Homo_sapiens/Variation/Summary?v=rs17321515	rs17321515	rs17321515	8	0.99	0.01	0	0	0.00012	0.5	-0.09	-0.02	G	A	0.46	http://www.ncbi.nlm.nih.gov/sites/entrez?Db=gene&Cmd=ShowDetailView&TermToSearch=10221&ordinalpos=1&itool=EntrezSystem2.PEntrez.Gene.Gene_ResultsPanel.Gene_RVDocSum	TRIB1	TRIB1	36	http://www.ncbi.nlm.nih.gov/sites/entrez?Db=gene&Cmd=ShowDetailView&TermToSearch=286053&ordinalpos=1&itool=EntrezSystem2.PEntrez.Gene.Gene_ResultsPanel.Gene_RVDocSum	NSMCE2	NSMCE2	107	http://www.ncbi.nlm.nih.gov/sites/entrez?Db=gene&Cmd=ShowDetailView&TermToSearch=9897&ordinalpos=1&itool=EntrezSystem2.PEntrez.Gene.Gene_ResultsPanel.Gene_RVDocSum	KIAA0196	KIAA0196	390	2.2	1.3	0.4	-0.2	0.0022	0.026	0.34	-0.5	-0.4	-0.5	-0.3	0.37	0.91	0.92
http://www.ensembl.org/Homo_sapiens/Variation/Summary?v=rs2980869	rs2980869	rs2980869	8	0.99	0.01	0	0	0.00012	0.54	-0.09	-0.01	T	C	0.46	http://www.ncbi.nlm.nih.gov/sites/entrez?Db=gene&Cmd=ShowDetailView&TermToSearch=10221&ordinalpos=1&itool=EntrezSystem2.PEntrez.Gene.Gene_ResultsPanel.Gene_RVDocSum	TRIB1	TRIB1	38	http://www.ncbi.nlm.nih.gov/sites/entrez?Db=gene&Cmd=ShowDetailView&TermToSearch=286053&ordinalpos=1&itool=EntrezSystem2.PEntrez.Gene.Gene_ResultsPanel.Gene_RVDocSum	NSMCE2	NSMCE2	109	http://www.ncbi.nlm.nih.gov/sites/entrez?Db=gene&Cmd=ShowDetailView&TermToSearch=9897&ordinalpos=1&itool=EntrezSystem2.PEntrez.Gene.Gene_ResultsPanel.Gene_RVDocSum	KIAA0196	KIAA0196	392	2.2	1.3	0.4	-0.2	0.0023	0.027	0.34	-0.6	-0.4	-0.5	-0.3	0.4	0.88	0.85
http://www.ensembl.org/Homo_sapiens/Variation/Summary?v=rs2382808	rs2382808	rs2382808	9	0.98	0	0	0.01	0.12	1.9e-05	0.07	-0.19	A	T	0.08	http://www.ncbi.nlm.nih.gov/sites/entrez?Db=gene&Cmd=ShowDetailView&TermToSearch=54796&ordinalpos=1&itool=EntrezSystem2.PEntrez.Gene.Gene_ResultsPanel.Gene_RVDocSum	BNC2	BNC2	0	http://www.ncbi.nlm.nih.gov/sites/entrez?Db=gene&Cmd=ShowDetailView&TermToSearch=648570&ordinalpos=1&itool=EntrezSystem2.PEntrez.Gene.Gene_ResultsPanel.Gene_RVDocSum	LOC648570	LOC648570	232	http://www.ncbi.nlm.nih.gov/sites/entrez?Db=gene&Cmd=ShowDetailView&TermToSearch=203238&ordinalpos=1&itool=EntrezSystem2.PEntrez.Gene.Gene_ResultsPanel.Gene_RVDocSum	C9orf93	C9orf93	582	0.1	-0.1	-0.2	0	0.21	0.91	0.17	3.1	0.9	0.4	0.8	0.0064	0.027	0.006
http://www.ensembl.org/Homo_sapiens/Variation/Summary?v=rs2891072	rs2891072	rs2891072	9	0.98	0	0	0.02	0.12	1.5e-05	0.07	-0.2	A	C	0.08	http://www.ncbi.nlm.nih.gov/sites/entrez?Db=gene&Cmd=ShowDetailView&TermToSearch=54796&ordinalpos=1&itool=EntrezSystem2.PEntrez.Gene.Gene_ResultsPanel.Gene_RVDocSum	BNC2	BNC2	0	http://www.ncbi.nlm.nih.gov/sites/entrez?Db=gene&Cmd=ShowDetailView&TermToSearch=648570&ordinalpos=1&itool=EntrezSystem2.PEntrez.Gene.Gene_ResultsPanel.Gene_RVDocSum	LOC648570	LOC648570	232	http://www.ncbi.nlm.nih.gov/sites/entrez?Db=gene&Cmd=ShowDetailView&TermToSearch=203238&ordinalpos=1&itool=EntrezSystem2.PEntrez.Gene.Gene_ResultsPanel.Gene_RVDocSum	C9orf93	C9orf93	582	0	-0.1	-0.2	0	0.23	0.84	0.15	3.2	0.9	0.4	0.8	0.0055	0.027	0.0061
http://www.ensembl.org/Homo_sapiens/Variation/Summary?v=rs2382809	rs2382809	rs2382809	9	0.98	0	0	0.01	0.12	1.5e-05	0.07	-0.2	T	A	0.08	http://www.ncbi.nlm.nih.gov/sites/entrez?Db=gene&Cmd=ShowDetailView&TermToSearch=54796&ordinalpos=1&itool=EntrezSystem2.PEntrez.Gene.Gene_ResultsPanel.Gene_RVDocSum	BNC2	BNC2	0	http://www.ncbi.nlm.nih.gov/sites/entrez?Db=gene&Cmd=ShowDetailView&TermToSearch=648570&ordinalpos=1&itool=EntrezSystem2.PEntrez.Gene.Gene_ResultsPanel.Gene_RVDocSum	LOC648570	LOC648570	231	http://www.ncbi.nlm.nih.gov/sites/entrez?Db=gene&Cmd=ShowDetailView&TermToSearch=203238&ordinalpos=1&itool=EntrezSystem2.PEntrez.Gene.Gene_ResultsPanel.Gene_RVDocSum	C9orf93	C9orf93	582	0	-0.1	-0.2	0	0.24	0.84	0.15	3.2	0.9	0.4	0.8	0.0055	0.027	0.0065
http://www.ensembl.org/Homo_sapiens/Variation/Summary?v=rs2382810	rs2382810	rs2382810	9	0.98	0	0	0.01	0.11	1.6e-05	0.07	-0.2	T	C	0.08	http://www.ncbi.nlm.nih.gov/sites/entrez?Db=gene&Cmd=ShowDetailView&TermToSearch=54796&ordinalpos=1&itool=EntrezSystem2.PEntrez.Gene.Gene_ResultsPanel.Gene_RVDocSum	BNC2	BNC2	0	http://www.ncbi.nlm.nih.gov/sites/entrez?Db=gene&Cmd=ShowDetailView&TermToSearch=648570&ordinalpos=1&itool=EntrezSystem2.PEntrez.Gene.Gene_ResultsPanel.Gene_RVDocSum	LOC648570	LOC648570	231	http://www.ncbi.nlm.nih.gov/sites/entrez?Db=gene&Cmd=ShowDetailView&TermToSearch=203238&ordinalpos=1&itool=EntrezSystem2.PEntrez.Gene.Gene_ResultsPanel.Gene_RVDocSum	C9orf93	C9orf93	582	0	-0.1	-0.2	0	0.23	0.84	0.15	3.2	0.9	0.4	0.8	0.0056	0.027	0.0066
http://www.ensembl.org/Homo_sapiens/Variation/Summary?v=rs6475059	rs6475059	rs6475059	9	0.98	0	0	0.01	0.12	1.6e-05	0.07	-0.2	A	G	0.08	http://www.ncbi.nlm.nih.gov/sites/entrez?Db=gene&Cmd=ShowDetailView&TermToSearch=54796&ordinalpos=1&itool=EntrezSystem2.PEntrez.Gene.Gene_ResultsPanel.Gene_RVDocSum	BNC2	BNC2	0	http://www.ncbi.nlm.nih.gov/sites/entrez?Db=gene&Cmd=ShowDetailView&TermToSearch=648570&ordinalpos=1&itool=EntrezSystem2.PEntrez.Gene.Gene_ResultsPanel.Gene_RVDocSum	LOC648570	LOC648570	231	http://www.ncbi.nlm.nih.gov/sites/entrez?Db=gene&Cmd=ShowDetailView&TermToSearch=203238&ordinalpos=1&itool=EntrezSystem2.PEntrez.Gene.Gene_ResultsPanel.Gene_RVDocSum	C9orf93	C9orf93	583	0	-0.1	-0.2	0	0.24	0.84	0.14	3.2	0.9	0.4	0.8	0.0056	0.028	0.0067
http://www.ensembl.org/Homo_sapiens/Variation/Summary?v=rs12350853	rs12350853	rs12350853	9	0.98	0	0	0.01	0.12	1.7e-05	0.07	-0.2	T	C	0.08	http://www.ncbi.nlm.nih.gov/sites/entrez?Db=gene&Cmd=ShowDetailView&TermToSearch=54796&ordinalpos=1&itool=EntrezSystem2.PEntrez.Gene.Gene_ResultsPanel.Gene_RVDocSum	BNC2	BNC2	0	http://www.ncbi.nlm.nih.gov/sites/entrez?Db=gene&Cmd=ShowDetailView&TermToSearch=648570&ordinalpos=1&itool=EntrezSystem2.PEntrez.Gene.Gene_ResultsPanel.Gene_RVDocSum	LOC648570	LOC648570	231	http://www.ncbi.nlm.nih.gov/sites/entrez?Db=gene&Cmd=ShowDetailView&TermToSearch=203238&ordinalpos=1&itool=EntrezSystem2.PEntrez.Gene.Gene_ResultsPanel.Gene_RVDocSum	C9orf93	C9orf93	583	0	-0.1	-0.2	0	0.24	0.83	0.14	3.1	0.9	0.4	0.8	0.0055	0.028	0.0069
http://www.ensembl.org/Homo_sapiens/Variation/Summary?v=rs6475060	rs6475060	rs6475060	9	0.98	0	0	0.01	0.12	1.8e-05	0.07	-0.2	T	C	0.08	http://www.ncbi.nlm.nih.gov/sites/entrez?Db=gene&Cmd=ShowDetailView&TermToSearch=54796&ordinalpos=1&itool=EntrezSystem2.PEntrez.Gene.Gene_ResultsPanel.Gene_RVDocSum	BNC2	BNC2	0	http://www.ncbi.nlm.nih.gov/sites/entrez?Db=gene&Cmd=ShowDetailView&TermToSearch=648570&ordinalpos=1&itool=EntrezSystem2.PEntrez.Gene.Gene_ResultsPanel.Gene_RVDocSum	LOC648570	LOC648570	228	http://www.ncbi.nlm.nih.gov/sites/entrez?Db=gene&Cmd=ShowDetailView&TermToSearch=203238&ordinalpos=1&itool=EntrezSystem2.PEntrez.Gene.Gene_ResultsPanel.Gene_RVDocSum	C9orf93	C9orf93	586	0	-0.1	-0.2	0	0.25	0.79	0.16	3.1	0.9	0.4	0.8	0.0055	0.03	0.0068
http://www.ensembl.org/Homo_sapiens/Variation/Summary?v=rs6475062	rs6475062	rs6475062	9	0.99	0	0	0.01	0.075	2.6e-05	0.08	-0.19	C	G	0.09	http://www.ncbi.nlm.nih.gov/sites/entrez?Db=gene&Cmd=ShowDetailView&TermToSearch=54796&ordinalpos=1&itool=EntrezSystem2.PEntrez.Gene.Gene_ResultsPanel.Gene_RVDocSum	BNC2	BNC2	0	http://www.ncbi.nlm.nih.gov/sites/entrez?Db=gene&Cmd=ShowDetailView&TermToSearch=648570&ordinalpos=1&itool=EntrezSystem2.PEntrez.Gene.Gene_ResultsPanel.Gene_RVDocSum	LOC648570	LOC648570	223	http://www.ncbi.nlm.nih.gov/sites/entrez?Db=gene&Cmd=ShowDetailView&TermToSearch=203238&ordinalpos=1&itool=EntrezSystem2.PEntrez.Gene.Gene_ResultsPanel.Gene_RVDocSum	C9orf93	C9orf93	591	0.2	-0.1	-0.2	0	0.28	0.4	0.2	3	0.9	0.3	0.8	0.0049	0.048	0.0078
http://www.ensembl.org/Homo_sapiens/Variation/Summary?v=rs1927616	rs1927616	rs1927616	9	0.99	0	0	0.01	0.086	2.8e-05	0.08	-0.19	A	G	0.09	http://www.ncbi.nlm.nih.gov/sites/entrez?Db=gene&Cmd=ShowDetailView&TermToSearch=54796&ordinalpos=1&itool=EntrezSystem2.PEntrez.Gene.Gene_ResultsPanel.Gene_RVDocSum	BNC2	BNC2	0	http://www.ncbi.nlm.nih.gov/sites/entrez?Db=gene&Cmd=ShowDetailView&TermToSearch=648570&ordinalpos=1&itool=EntrezSystem2.PEntrez.Gene.Gene_ResultsPanel.Gene_RVDocSum	LOC648570	LOC648570	222	http://www.ncbi.nlm.nih.gov/sites/entrez?Db=gene&Cmd=ShowDetailView&TermToSearch=203238&ordinalpos=1&itool=EntrezSystem2.PEntrez.Gene.Gene_ResultsPanel.Gene_RVDocSum	C9orf93	C9orf93	591	0.2	-0.2	-0.2	0	0.34	0.37	0.19	3	0.9	0.3	0.7	0.0049	0.052	0.0084
http://www.ensembl.org/Homo_sapiens/Variation/Summary?v=rs7870380	rs7870380	rs7870380	9	0.99	0	0	0.01	0.1	2.9e-05	0.07	-0.19	A	C	0.08	http://www.ncbi.nlm.nih.gov/sites/entrez?Db=gene&Cmd=ShowDetailView&TermToSearch=54796&ordinalpos=1&itool=EntrezSystem2.PEntrez.Gene.Gene_ResultsPanel.Gene_RVDocSum	BNC2	BNC2	0	http://www.ncbi.nlm.nih.gov/sites/entrez?Db=gene&Cmd=ShowDetailView&TermToSearch=648570&ordinalpos=1&itool=EntrezSystem2.PEntrez.Gene.Gene_ResultsPanel.Gene_RVDocSum	LOC648570	LOC648570	222	http://www.ncbi.nlm.nih.gov/sites/entrez?Db=gene&Cmd=ShowDetailView&TermToSearch=203238&ordinalpos=1&itool=EntrezSystem2.PEntrez.Gene.Gene_ResultsPanel.Gene_RVDocSum	C9orf93	C9orf93	592	0.1	-0.2	-0.2	0	0.42	0.37	0.18	2.9	0.9	0.3	0.7	0.0051	0.051	0.0084
http://www.ensembl.org/Homo_sapiens/Variation/Summary?v=rs10962493	rs10962493	rs10962493	9	0.98	0	0	0.02	0.11	1.8e-05	0.08	-0.2	A	C	0.08	http://www.ncbi.nlm.nih.gov/sites/entrez?Db=gene&Cmd=ShowDetailView&TermToSearch=54796&ordinalpos=1&itool=EntrezSystem2.PEntrez.Gene.Gene_ResultsPanel.Gene_RVDocSum	BNC2	BNC2	0	http://www.ncbi.nlm.nih.gov/sites/entrez?Db=gene&Cmd=ShowDetailView&TermToSearch=648570&ordinalpos=1&itool=EntrezSystem2.PEntrez.Gene.Gene_ResultsPanel.Gene_RVDocSum	LOC648570	LOC648570	213	http://www.ncbi.nlm.nih.gov/sites/entrez?Db=gene&Cmd=ShowDetailView&TermToSearch=203238&ordinalpos=1&itool=EntrezSystem2.PEntrez.Gene.Gene_ResultsPanel.Gene_RVDocSum	C9orf93	C9orf93	600	0.1	-0.2	-0.1	0.1	0.73	0.29	0.11	3.2	0.8	0.4	0.9	0.0062	0.037	0.0057
http://www.ensembl.org/Homo_sapiens/Variation/Summary?v=rs1927617	rs1927617	rs1927617	9	0.98	0	0	0.02	0.1	1.8e-05	0.08	-0.21	T	C	0.08	http://www.ncbi.nlm.nih.gov/sites/entrez?Db=gene&Cmd=ShowDetailView&TermToSearch=54796&ordinalpos=1&itool=EntrezSystem2.PEntrez.Gene.Gene_ResultsPanel.Gene_RVDocSum	BNC2	BNC2	0	http://www.ncbi.nlm.nih.gov/sites/entrez?Db=gene&Cmd=ShowDetailView&TermToSearch=648570&ordinalpos=1&itool=EntrezSystem2.PEntrez.Gene.Gene_ResultsPanel.Gene_RVDocSum	LOC648570	LOC648570	213	http://www.ncbi.nlm.nih.gov/sites/entrez?Db=gene&Cmd=ShowDetailView&TermToSearch=203238&ordinalpos=1&itool=EntrezSystem2.PEntrez.Gene.Gene_ResultsPanel.Gene_RVDocSum	C9orf93	C9orf93	601	0.1	-0.2	-0.1	0.1	0.74	0.29	0.11	3.2	0.8	0.4	0.9	0.0064	0.036	0.0055
http://www.ensembl.org/Homo_sapiens/Variation/Summary?v=rs12352543	rs12352543	rs12352543	9	0.98	0	0	0.01	0.09	2.3e-05	0.09	-0.22	G	A	0.07	http://www.ncbi.nlm.nih.gov/sites/entrez?Db=gene&Cmd=ShowDetailView&TermToSearch=54796&ordinalpos=1&itool=EntrezSystem2.PEntrez.Gene.Gene_ResultsPanel.Gene_RVDocSum	BNC2	BNC2	0	http://www.ncbi.nlm.nih.gov/sites/entrez?Db=gene&Cmd=ShowDetailView&TermToSearch=648570&ordinalpos=1&itool=EntrezSystem2.PEntrez.Gene.Gene_ResultsPanel.Gene_RVDocSum	LOC648570	LOC648570	212	http://www.ncbi.nlm.nih.gov/sites/entrez?Db=gene&Cmd=ShowDetailView&TermToSearch=203238&ordinalpos=1&itool=EntrezSystem2.PEntrez.Gene.Gene_ResultsPanel.Gene_RVDocSum	C9orf93	C9orf93	602	0.1	-0.2	-0.1	0.1	0.75	0.28	0.11	3.1	0.7	0.4	0.9	0.0069	0.037	0.0051
http://www.ensembl.org/Homo_sapiens/Variation/Summary?v=rs7850123	rs7850123	rs7850123	9	0.99	0	0	0.01	0.07	3.3e-05	0.09	-0.21	C	T	0.09	http://www.ncbi.nlm.nih.gov/sites/entrez?Db=gene&Cmd=ShowDetailView&TermToSearch=54796&ordinalpos=1&itool=EntrezSystem2.PEntrez.Gene.Gene_ResultsPanel.Gene_RVDocSum	BNC2	BNC2	0	http://www.ncbi.nlm.nih.gov/sites/entrez?Db=gene&Cmd=ShowDetailView&TermToSearch=648570&ordinalpos=1&itool=EntrezSystem2.PEntrez.Gene.Gene_ResultsPanel.Gene_RVDocSum	LOC648570	LOC648570	212	http://www.ncbi.nlm.nih.gov/sites/entrez?Db=gene&Cmd=ShowDetailView&TermToSearch=203238&ordinalpos=1&itool=EntrezSystem2.PEntrez.Gene.Gene_ResultsPanel.Gene_RVDocSum	C9orf93	C9orf93	602	0.2	-0.2	-0.1	0.1	0.75	0.2	0.11	2.9	0.9	0.2	1	0.0046	0.077	0.0043
http://www.ensembl.org/Homo_sapiens/Variation/Summary?v=rs7863885	rs7863885	rs7863885	9	0.99	0	0	0.01	0.069	2.8e-05	0.09	-0.21	C	A	0.08	http://www.ncbi.nlm.nih.gov/sites/entrez?Db=gene&Cmd=ShowDetailView&TermToSearch=54796&ordinalpos=1&itool=EntrezSystem2.PEntrez.Gene.Gene_ResultsPanel.Gene_RVDocSum	BNC2	BNC2	0	http://www.ncbi.nlm.nih.gov/sites/entrez?Db=gene&Cmd=ShowDetailView&TermToSearch=648570&ordinalpos=1&itool=EntrezSystem2.PEntrez.Gene.Gene_ResultsPanel.Gene_RVDocSum	LOC648570	LOC648570	211	http://www.ncbi.nlm.nih.gov/sites/entrez?Db=gene&Cmd=ShowDetailView&TermToSearch=203238&ordinalpos=1&itool=EntrezSystem2.PEntrez.Gene.Gene_ResultsPanel.Gene_RVDocSum	C9orf93	C9orf93	602	0.2	-0.2	0	0.1	0.74	0.19	0.12	3	0.9	0.2	1	0.0043	0.079	0.0036
http://www.ensembl.org/Homo_sapiens/Variation/Summary?v=rs12002673	rs12002673	rs12002673	9	0.99	0	0	0.01	0.085	2.2e-05	0.09	-0.22	T	C	0.07	http://www.ncbi.nlm.nih.gov/sites/entrez?Db=gene&Cmd=ShowDetailView&TermToSearch=54796&ordinalpos=1&itool=EntrezSystem2.PEntrez.Gene.Gene_ResultsPanel.Gene_RVDocSum	BNC2	BNC2	0	http://www.ncbi.nlm.nih.gov/sites/entrez?Db=gene&Cmd=ShowDetailView&TermToSearch=648570&ordinalpos=1&itool=EntrezSystem2.PEntrez.Gene.Gene_ResultsPanel.Gene_RVDocSum	LOC648570	LOC648570	211	http://www.ncbi.nlm.nih.gov/sites/entrez?Db=gene&Cmd=ShowDetailView&TermToSearch=203238&ordinalpos=1&itool=EntrezSystem2.PEntrez.Gene.Gene_ResultsPanel.Gene_RVDocSum	C9orf93	C9orf93	602	0.2	-0.2	-0.1	0.1	0.73	0.26	0.12	3	0.8	0.3	1	0.0064	0.049	0.0034
http://www.ensembl.org/Homo_sapiens/Variation/Summary?v=rs7350234	rs7350234	rs7350234	9	0.99	0	0	0.01	0.076	3.9e-05	0.1	-0.23	C	T	0.07	http://www.ncbi.nlm.nih.gov/sites/entrez?Db=gene&Cmd=ShowDetailView&TermToSearch=54796&ordinalpos=1&itool=EntrezSystem2.PEntrez.Gene.Gene_ResultsPanel.Gene_RVDocSum	BNC2	BNC2	0	http://www.ncbi.nlm.nih.gov/sites/entrez?Db=gene&Cmd=ShowDetailView&TermToSearch=648570&ordinalpos=1&itool=EntrezSystem2.PEntrez.Gene.Gene_ResultsPanel.Gene_RVDocSum	LOC648570	LOC648570	199	http://www.ncbi.nlm.nih.gov/sites/entrez?Db=gene&Cmd=ShowDetailView&TermToSearch=203238&ordinalpos=1&itool=EntrezSystem2.PEntrez.Gene.Gene_ResultsPanel.Gene_RVDocSum	C9orf93	C9orf93	614	0.2	-0.2	0	-0.1	0.66	0.17	0.25	2.9	0.9	0.2	0.9	0.0031	0.075	0.005
http://www.ensembl.org/Homo_sapiens/Variation/Summary?v=rs1927626	rs1927626	rs1927626	9	0.99	0	0	0.01	0.061	4.1e-05	0.11	-0.23	C	T	0.07	http://www.ncbi.nlm.nih.gov/sites/entrez?Db=gene&Cmd=ShowDetailView&TermToSearch=54796&ordinalpos=1&itool=EntrezSystem2.PEntrez.Gene.Gene_ResultsPanel.Gene_RVDocSum	BNC2	BNC2	0	http://www.ncbi.nlm.nih.gov/sites/entrez?Db=gene&Cmd=ShowDetailView&TermToSearch=648570&ordinalpos=1&itool=EntrezSystem2.PEntrez.Gene.Gene_ResultsPanel.Gene_RVDocSum	LOC648570	LOC648570	198	http://www.ncbi.nlm.nih.gov/sites/entrez?Db=gene&Cmd=ShowDetailView&TermToSearch=203238&ordinalpos=1&itool=EntrezSystem2.PEntrez.Gene.Gene_ResultsPanel.Gene_RVDocSum	C9orf93	C9orf93	616	0.3	-0.1	0	-0.1	0.56	0.15	0.26	2.8	1	0.1	0.9	0.0021	0.092	0.0048
[truncated: 262 more rows]
