# Supplementary material for: Genome-Wide Association of Lipid-Lowering Response to Statins in Combined Study Populations
Source: PLoS One. 2010 Mar 22;5(3):e9763. doi: 10.1371/journal.pone.0009763 (PMC2842298; doi:10.1371/journal.pone.0009763)
Supplement: Table S3 — Single nucleotide polymorphisms (SNPs) associated with difference or sum traits for LDL-cholesterol with a posterior probability greater than 1%. SNPs are listed by reference SNP accession ID (rs#) and are ordered by chromosome number and location on each chromosome. Posterior probabilities calculated by Bayesian analysis are listed for H0, HS, HD, HS+D followed by p-values and effect sizes as calculated by frequentist statistics for the sum and difference traits. Major and minor alleles are listed. Abbreviations: MAF, minor allele frequency; chr, chromosome; GENE1-3, genes closest to variant; dist1-3, distance of gene1-3 to variant; log10BF, log(base 10) transformed bayes factor for: S, sum trait in total population; S-TNT, sum trait in TNT population; S-PRINCE, sum trait in PRINCE population; S-CAP, sum trait in CAP population; D, difference trait in total population; D-TNT, difference trait in TNT population; D-PRINCE, difference trait in PRINCE population; D-CAP, difference trait in CAP population; P-values from individual populations are also listed for each SNP. A complete results list for all ∼2.5 million sites is available online at http://stephenslab.uchicago.edu/publications.html. (0.67 MB XLS) [file pone.0009763.s006.xls]

## Sheet: Sheet1
rs-link	rsnum	SNP	chr	HO	HS	HD	HS+D	P-value-S	P-value-D	Effect-S	Effect-D	Minor Allele	Major Allele	MAF	GENE1-link	GENE1	GENE1	dist1 (Kb)	GENE2-link	GENE2	GENE2	dist2 (Kb)	GENE3-link	GENE3	GENE3	dist3 (Kb)	log10BF-S	log10BF-S-TNT	log10BF-S-PRINCE	log10BF-S-CAP	P-value-S-TNT	P-value-S-PRINCE	P-value-S-CAP	log10BF-D	log10BF-D-TNT	log10BF-D-PRINCE	log10BF-D-CAP	P-value-D-TNT	P-value-D-PRINCE	P-value-D-CAP
http://www.ensembl.org/Homo_sapiens/Variation/Summary?v=rs7538228	rs7538228	rs7538228	1	0.99	0.01	0	0	0.00019	0.48	0.12	-0.02	T	G	0.16	http://www.ncbi.nlm.nih.gov/sites/entrez?Db=gene&Cmd=ShowDetailView&TermToSearch=79647&ordinalpos=1&itool=EntrezSystem2.PEntrez.Gene.Gene_ResultsPanel.Gene_RVDocSum	C1orf108	C1orf108	7	http://www.ncbi.nlm.nih.gov/sites/entrez?Db=gene&Cmd=ShowDetailView&TermToSearch=4725&ordinalpos=1&itool=EntrezSystem2.PEntrez.Gene.Gene_ResultsPanel.Gene_RVDocSum	NDUFS5	NDUFS5	14	http://www.ncbi.nlm.nih.gov/sites/entrez?Db=gene&Cmd=ShowDetailView&TermToSearch=23499&ordinalpos=1&itool=EntrezSystem2.PEntrez.Gene.Gene_ResultsPanel.Gene_RVDocSum	MACF1	MACF1	69	2.1	0.1	0.4	0.9	0.076	0.023	0.0059	-0.5	-0.4	-0.3	-0.3	0.58	0.42	0.76
http://www.ensembl.org/Homo_sapiens/Variation/Summary?v=rs1555745	rs1555745	rs1555745	1	0.98	0.02	0	0	0.00014	0.35	0.12	-0.03	A	G	0.17	http://www.ncbi.nlm.nih.gov/sites/entrez?Db=gene&Cmd=ShowDetailView&TermToSearch=4725&ordinalpos=1&itool=EntrezSystem2.PEntrez.Gene.Gene_ResultsPanel.Gene_RVDocSum	NDUFS5	NDUFS5	9	http://www.ncbi.nlm.nih.gov/sites/entrez?Db=gene&Cmd=ShowDetailView&TermToSearch=79647&ordinalpos=1&itool=EntrezSystem2.PEntrez.Gene.Gene_ResultsPanel.Gene_RVDocSum	C1orf108	C1orf108	12	http://www.ncbi.nlm.nih.gov/sites/entrez?Db=gene&Cmd=ShowDetailView&TermToSearch=23499&ordinalpos=1&itool=EntrezSystem2.PEntrez.Gene.Gene_ResultsPanel.Gene_RVDocSum	MACF1	MACF1	64	2.2	0.2	0.5	0.9	0.066	0.02	0.0055	-0.4	-0.4	-0.2	-0.3	0.49	0.31	0.78
http://www.ensembl.org/Homo_sapiens/Variation/Summary?v=rs1974041	rs1974041	rs1974041	1	0.98	0.02	0	0	0.00013	0.34	0.12	-0.03	A	T	0.17	http://www.ncbi.nlm.nih.gov/sites/entrez?Db=gene&Cmd=ShowDetailView&TermToSearch=4725&ordinalpos=1&itool=EntrezSystem2.PEntrez.Gene.Gene_ResultsPanel.Gene_RVDocSum	NDUFS5	NDUFS5	9	http://www.ncbi.nlm.nih.gov/sites/entrez?Db=gene&Cmd=ShowDetailView&TermToSearch=79647&ordinalpos=1&itool=EntrezSystem2.PEntrez.Gene.Gene_ResultsPanel.Gene_RVDocSum	C1orf108	C1orf108	12	http://www.ncbi.nlm.nih.gov/sites/entrez?Db=gene&Cmd=ShowDetailView&TermToSearch=23499&ordinalpos=1&itool=EntrezSystem2.PEntrez.Gene.Gene_ResultsPanel.Gene_RVDocSum	MACF1	MACF1	64	2.3	0.2	0.5	0.9	0.066	0.019	0.0052	-0.4	-0.4	-0.2	-0.3	0.49	0.31	0.79
http://www.ensembl.org/Homo_sapiens/Variation/Summary?v=rs1984600	rs1984600	rs1984600	1	0.98	0.02	0	0	0.00013	0.34	0.12	-0.03	G	C	0.17	http://www.ncbi.nlm.nih.gov/sites/entrez?Db=gene&Cmd=ShowDetailView&TermToSearch=4725&ordinalpos=1&itool=EntrezSystem2.PEntrez.Gene.Gene_ResultsPanel.Gene_RVDocSum	NDUFS5	NDUFS5	0	http://www.ncbi.nlm.nih.gov/sites/entrez?Db=gene&Cmd=ShowDetailView&TermToSearch=79647&ordinalpos=1&itool=EntrezSystem2.PEntrez.Gene.Gene_ResultsPanel.Gene_RVDocSum	C1orf108	C1orf108	21	http://www.ncbi.nlm.nih.gov/sites/entrez?Db=gene&Cmd=ShowDetailView&TermToSearch=23499&ordinalpos=1&itool=EntrezSystem2.PEntrez.Gene.Gene_ResultsPanel.Gene_RVDocSum	MACF1	MACF1	55	2.3	0.2	0.5	0.9	0.066	0.019	0.0052	-0.4	-0.4	-0.2	-0.3	0.49	0.31	0.79
http://www.ensembl.org/Homo_sapiens/Variation/Summary?v=rs1555741	rs1555741	rs1555741	1	0.98	0.02	0	0	0.00014	0.35	0.12	-0.03	T	C	0.17	http://www.ncbi.nlm.nih.gov/sites/entrez?Db=gene&Cmd=ShowDetailView&TermToSearch=4725&ordinalpos=1&itool=EntrezSystem2.PEntrez.Gene.Gene_ResultsPanel.Gene_RVDocSum	NDUFS5	NDUFS5	0	http://www.ncbi.nlm.nih.gov/sites/entrez?Db=gene&Cmd=ShowDetailView&TermToSearch=79647&ordinalpos=1&itool=EntrezSystem2.PEntrez.Gene.Gene_ResultsPanel.Gene_RVDocSum	C1orf108	C1orf108	22	http://www.ncbi.nlm.nih.gov/sites/entrez?Db=gene&Cmd=ShowDetailView&TermToSearch=23499&ordinalpos=1&itool=EntrezSystem2.PEntrez.Gene.Gene_ResultsPanel.Gene_RVDocSum	MACF1	MACF1	54	2.2	0.2	0.5	0.9	0.065	0.02	0.0055	-0.4	-0.4	-0.2	-0.3	0.49	0.31	0.77
http://www.ensembl.org/Homo_sapiens/Variation/Summary?v=rs6663155	rs6663155	rs6663155	1	0.99	0.01	0	0	0.00018	0.48	0.12	-0.02	G	A	0.16	http://www.ncbi.nlm.nih.gov/sites/entrez?Db=gene&Cmd=ShowDetailView&TermToSearch=4725&ordinalpos=1&itool=EntrezSystem2.PEntrez.Gene.Gene_ResultsPanel.Gene_RVDocSum	NDUFS5	NDUFS5	0	http://www.ncbi.nlm.nih.gov/sites/entrez?Db=gene&Cmd=ShowDetailView&TermToSearch=79647&ordinalpos=1&itool=EntrezSystem2.PEntrez.Gene.Gene_ResultsPanel.Gene_RVDocSum	C1orf108	C1orf108	28	http://www.ncbi.nlm.nih.gov/sites/entrez?Db=gene&Cmd=ShowDetailView&TermToSearch=23499&ordinalpos=1&itool=EntrezSystem2.PEntrez.Gene.Gene_ResultsPanel.Gene_RVDocSum	MACF1	MACF1	49	2.1	0.1	0.5	0.9	0.082	0.018	0.0059	-0.5	-0.4	-0.3	-0.3	0.63	0.39	0.75
http://www.ensembl.org/Homo_sapiens/Variation/Summary?v=rs7554800	rs7554800	rs7554800	1	0.99	0.01	0	0	0.00017	0.47	0.12	-0.02	T	C	0.16	http://www.ncbi.nlm.nih.gov/sites/entrez?Db=gene&Cmd=ShowDetailView&TermToSearch=4725&ordinalpos=1&itool=EntrezSystem2.PEntrez.Gene.Gene_ResultsPanel.Gene_RVDocSum	NDUFS5	NDUFS5	4	http://www.ncbi.nlm.nih.gov/sites/entrez?Db=gene&Cmd=ShowDetailView&TermToSearch=79647&ordinalpos=1&itool=EntrezSystem2.PEntrez.Gene.Gene_ResultsPanel.Gene_RVDocSum	C1orf108	C1orf108	33	http://www.ncbi.nlm.nih.gov/sites/entrez?Db=gene&Cmd=ShowDetailView&TermToSearch=23499&ordinalpos=1&itool=EntrezSystem2.PEntrez.Gene.Gene_ResultsPanel.Gene_RVDocSum	MACF1	MACF1	43	2.2	0.1	0.5	0.8	0.076	0.019	0.0062	-0.5	-0.4	-0.3	-0.3	0.6	0.4	0.76
http://www.ensembl.org/Homo_sapiens/Variation/Summary?v=rs7554809	rs7554809	rs7554809	1	0.98	0.02	0	0	0.00013	0.32	0.12	-0.03	T	C	0.17	http://www.ncbi.nlm.nih.gov/sites/entrez?Db=gene&Cmd=ShowDetailView&TermToSearch=4725&ordinalpos=1&itool=EntrezSystem2.PEntrez.Gene.Gene_ResultsPanel.Gene_RVDocSum	NDUFS5	NDUFS5	4	http://www.ncbi.nlm.nih.gov/sites/entrez?Db=gene&Cmd=ShowDetailView&TermToSearch=79647&ordinalpos=1&itool=EntrezSystem2.PEntrez.Gene.Gene_ResultsPanel.Gene_RVDocSum	C1orf108	C1orf108	33	http://www.ncbi.nlm.nih.gov/sites/entrez?Db=gene&Cmd=ShowDetailView&TermToSearch=23499&ordinalpos=1&itool=EntrezSystem2.PEntrez.Gene.Gene_ResultsPanel.Gene_RVDocSum	MACF1	MACF1	43	2.3	0.2	0.5	0.9	0.065	0.019	0.0054	-0.4	-0.4	-0.2	-0.3	0.45	0.3	0.77
http://www.ensembl.org/Homo_sapiens/Variation/Summary?v=rs4660993	rs4660993	rs4660993	1	0.98	0.02	0	0	0.00014	0.33	0.12	-0.03	A	G	0.17	http://www.ncbi.nlm.nih.gov/sites/entrez?Db=gene&Cmd=ShowDetailView&TermToSearch=4725&ordinalpos=1&itool=EntrezSystem2.PEntrez.Gene.Gene_ResultsPanel.Gene_RVDocSum	NDUFS5	NDUFS5	5	http://www.ncbi.nlm.nih.gov/sites/entrez?Db=gene&Cmd=ShowDetailView&TermToSearch=79647&ordinalpos=1&itool=EntrezSystem2.PEntrez.Gene.Gene_ResultsPanel.Gene_RVDocSum	C1orf108	C1orf108	35	http://www.ncbi.nlm.nih.gov/sites/entrez?Db=gene&Cmd=ShowDetailView&TermToSearch=23499&ordinalpos=1&itool=EntrezSystem2.PEntrez.Gene.Gene_ResultsPanel.Gene_RVDocSum	MACF1	MACF1	42	2.2	0.2	0.5	0.9	0.065	0.02	0.0058	-0.4	-0.4	-0.2	-0.3	0.45	0.31	0.76
http://www.ensembl.org/Homo_sapiens/Variation/Summary?v=rs10888651	rs10888651	rs10888651	1	0.99	0.01	0	0	0.00017	0.31	0.12	-0.03	C	T	0.17	http://www.ncbi.nlm.nih.gov/sites/entrez?Db=gene&Cmd=ShowDetailView&TermToSearch=4725&ordinalpos=1&itool=EntrezSystem2.PEntrez.Gene.Gene_ResultsPanel.Gene_RVDocSum	NDUFS5	NDUFS5	7	http://www.ncbi.nlm.nih.gov/sites/entrez?Db=gene&Cmd=ShowDetailView&TermToSearch=79647&ordinalpos=1&itool=EntrezSystem2.PEntrez.Gene.Gene_ResultsPanel.Gene_RVDocSum	C1orf108	C1orf108	36	http://www.ncbi.nlm.nih.gov/sites/entrez?Db=gene&Cmd=ShowDetailView&TermToSearch=23499&ordinalpos=1&itool=EntrezSystem2.PEntrez.Gene.Gene_ResultsPanel.Gene_RVDocSum	MACF1	MACF1	40	2.2	0.2	0.5	0.8	0.069	0.02	0.0063	-0.4	-0.4	-0.2	-0.3	0.43	0.31	0.76
http://www.ensembl.org/Homo_sapiens/Variation/Summary?v=rs4661002	rs4661002	rs4661002	1	0.99	0.01	0	0	0.00018	0.31	0.12	-0.03	G	A	0.17	http://www.ncbi.nlm.nih.gov/sites/entrez?Db=gene&Cmd=ShowDetailView&TermToSearch=4725&ordinalpos=1&itool=EntrezSystem2.PEntrez.Gene.Gene_ResultsPanel.Gene_RVDocSum	NDUFS5	NDUFS5	8	http://www.ncbi.nlm.nih.gov/sites/entrez?Db=gene&Cmd=ShowDetailView&TermToSearch=79647&ordinalpos=1&itool=EntrezSystem2.PEntrez.Gene.Gene_ResultsPanel.Gene_RVDocSum	C1orf108	C1orf108	37	http://www.ncbi.nlm.nih.gov/sites/entrez?Db=gene&Cmd=ShowDetailView&TermToSearch=23499&ordinalpos=1&itool=EntrezSystem2.PEntrez.Gene.Gene_ResultsPanel.Gene_RVDocSum	MACF1	MACF1	39	2.2	0.2	0.5	0.8	0.067	0.021	0.0068	-0.4	-0.3	-0.2	-0.3	0.42	0.31	0.76
http://www.ensembl.org/Homo_sapiens/Variation/Summary?v=rs10465799	rs10465799	rs10465799	1	0.99	0.01	0	0	0.00018	0.31	0.12	-0.03	G	A	0.17	http://www.ncbi.nlm.nih.gov/sites/entrez?Db=gene&Cmd=ShowDetailView&TermToSearch=4725&ordinalpos=1&itool=EntrezSystem2.PEntrez.Gene.Gene_ResultsPanel.Gene_RVDocSum	NDUFS5	NDUFS5	18	http://www.ncbi.nlm.nih.gov/sites/entrez?Db=gene&Cmd=ShowDetailView&TermToSearch=23499&ordinalpos=1&itool=EntrezSystem2.PEntrez.Gene.Gene_ResultsPanel.Gene_RVDocSum	MACF1	MACF1	29	http://www.ncbi.nlm.nih.gov/sites/entrez?Db=gene&Cmd=ShowDetailView&TermToSearch=79647&ordinalpos=1&itool=EntrezSystem2.PEntrez.Gene.Gene_ResultsPanel.Gene_RVDocSum	C1orf108	C1orf108	47	2.2	0.2	0.5	0.8	0.07	0.02	0.0074	-0.4	-0.3	-0.3	-0.3	0.41	0.33	0.77
http://www.ensembl.org/Homo_sapiens/Variation/Summary?v=rs11205611	rs11205611	rs11205611	1	0.99	0.01	0	0	0.00019	0.3	0.11	-0.03	A	T	0.17	http://www.ncbi.nlm.nih.gov/sites/entrez?Db=gene&Cmd=ShowDetailView&TermToSearch=4725&ordinalpos=1&itool=EntrezSystem2.PEntrez.Gene.Gene_ResultsPanel.Gene_RVDocSum	NDUFS5	NDUFS5	19	http://www.ncbi.nlm.nih.gov/sites/entrez?Db=gene&Cmd=ShowDetailView&TermToSearch=23499&ordinalpos=1&itool=EntrezSystem2.PEntrez.Gene.Gene_ResultsPanel.Gene_RVDocSum	MACF1	MACF1	28	http://www.ncbi.nlm.nih.gov/sites/entrez?Db=gene&Cmd=ShowDetailView&TermToSearch=79647&ordinalpos=1&itool=EntrezSystem2.PEntrez.Gene.Gene_ResultsPanel.Gene_RVDocSum	C1orf108	C1orf108	48	2.1	0.2	0.5	0.8	0.07	0.021	0.0069	-0.4	-0.3	-0.2	-0.3	0.41	0.3	0.76
http://www.ensembl.org/Homo_sapiens/Variation/Summary?v=rs2377582	rs2377582	rs2377582	1	0.99	0.01	0	0	0.0002	0.29	0.11	-0.03	G	A	0.17	http://www.ncbi.nlm.nih.gov/sites/entrez?Db=gene&Cmd=ShowDetailView&TermToSearch=4725&ordinalpos=1&itool=EntrezSystem2.PEntrez.Gene.Gene_ResultsPanel.Gene_RVDocSum	NDUFS5	NDUFS5	22	http://www.ncbi.nlm.nih.gov/sites/entrez?Db=gene&Cmd=ShowDetailView&TermToSearch=23499&ordinalpos=1&itool=EntrezSystem2.PEntrez.Gene.Gene_ResultsPanel.Gene_RVDocSum	MACF1	MACF1	25	http://www.ncbi.nlm.nih.gov/sites/entrez?Db=gene&Cmd=ShowDetailView&TermToSearch=79647&ordinalpos=1&itool=EntrezSystem2.PEntrez.Gene.Gene_ResultsPanel.Gene_RVDocSum	C1orf108	C1orf108	51	2.1	0.2	0.5	0.8	0.07	0.022	0.0071	-0.4	-0.3	-0.2	-0.3	0.41	0.3	0.78
http://www.ensembl.org/Homo_sapiens/Variation/Summary?v=rs2428854	rs2428854	rs2428854	1	0.99	0.01	0	0	0.0002	0.78	-0.14	0.01	C	A	0.11	http://www.ncbi.nlm.nih.gov/sites/entrez?Db=gene&Cmd=ShowDetailView&TermToSearch=6487&ordinalpos=1&itool=EntrezSystem2.PEntrez.Gene.Gene_ResultsPanel.Gene_RVDocSum	ST3GAL3	ST3GAL3	0	http://www.ncbi.nlm.nih.gov/sites/entrez?Db=gene&Cmd=ShowDetailView&TermToSearch=9048&ordinalpos=1&itool=EntrezSystem2.PEntrez.Gene.Gene_ResultsPanel.Gene_RVDocSum	ARTN	ARTN	43	http://www.ncbi.nlm.nih.gov/sites/entrez?Db=gene&Cmd=ShowDetailView&TermToSearch=9670&ordinalpos=1&itool=EntrezSystem2.PEntrez.Gene.Gene_ResultsPanel.Gene_RVDocSum	IPO13	IPO13	56	2.1	0.8	-0.1	0.6	0.0074	0.18	0.0096	-0.5	-0.4	-0.3	-0.1	0.94	0.93	0.34
http://www.ensembl.org/Homo_sapiens/Variation/Summary?v=rs803683	rs803683	rs803683	1	0.99	0.01	0	0	0.0002	0.78	-0.14	0.01	G	T	0.11	http://www.ncbi.nlm.nih.gov/sites/entrez?Db=gene&Cmd=ShowDetailView&TermToSearch=6487&ordinalpos=1&itool=EntrezSystem2.PEntrez.Gene.Gene_ResultsPanel.Gene_RVDocSum	ST3GAL3	ST3GAL3	0	http://www.ncbi.nlm.nih.gov/sites/entrez?Db=gene&Cmd=ShowDetailView&TermToSearch=9048&ordinalpos=1&itool=EntrezSystem2.PEntrez.Gene.Gene_ResultsPanel.Gene_RVDocSum	ARTN	ARTN	41	http://www.ncbi.nlm.nih.gov/sites/entrez?Db=gene&Cmd=ShowDetailView&TermToSearch=9670&ordinalpos=1&itool=EntrezSystem2.PEntrez.Gene.Gene_ResultsPanel.Gene_RVDocSum	IPO13	IPO13	54	2.1	0.8	-0.1	0.6	0.0074	0.18	0.0096	-0.5	-0.4	-0.3	-0.1	0.94	0.93	0.33
http://www.ensembl.org/Homo_sapiens/Variation/Summary?v=rs803681	rs803681	rs803681	1	0.99	0.01	0	0	0.0002	0.76	-0.14	0.01	C	A	0.12	http://www.ncbi.nlm.nih.gov/sites/entrez?Db=gene&Cmd=ShowDetailView&TermToSearch=6487&ordinalpos=1&itool=EntrezSystem2.PEntrez.Gene.Gene_ResultsPanel.Gene_RVDocSum	ST3GAL3	ST3GAL3	0	http://www.ncbi.nlm.nih.gov/sites/entrez?Db=gene&Cmd=ShowDetailView&TermToSearch=9048&ordinalpos=1&itool=EntrezSystem2.PEntrez.Gene.Gene_ResultsPanel.Gene_RVDocSum	ARTN	ARTN	36	http://www.ncbi.nlm.nih.gov/sites/entrez?Db=gene&Cmd=ShowDetailView&TermToSearch=9670&ordinalpos=1&itool=EntrezSystem2.PEntrez.Gene.Gene_ResultsPanel.Gene_RVDocSum	IPO13	IPO13	50	2.1	0.8	-0.1	0.7	0.0079	0.18	0.0082	-0.5	-0.4	-0.3	-0.1	0.94	0.93	0.3
http://www.ensembl.org/Homo_sapiens/Variation/Summary?v=rs6588480	rs6588480	rs6588480	1	0.99	0.01	0	0	0.00014	0.26	-0.15	-0.04	A	G	0.15	http://www.ncbi.nlm.nih.gov/sites/entrez?Db=gene&Cmd=ShowDetailView&TermToSearch=148979&ordinalpos=1&itool=EntrezSystem2.PEntrez.Gene.Gene_ResultsPanel.Gene_RVDocSum	GLIS1	GLIS1	0	http://www.ncbi.nlm.nih.gov/sites/entrez?Db=gene&Cmd=ShowDetailView&TermToSearch=63948&ordinalpos=1&itool=EntrezSystem2.PEntrez.Gene.Gene_ResultsPanel.Gene_RVDocSum	DMRTB1	DMRTB1	45	http://www.ncbi.nlm.nih.gov/sites/entrez?Db=gene&Cmd=ShowDetailView&TermToSearch=163742&ordinalpos=1&itool=EntrezSystem2.PEntrez.Gene.Gene_ResultsPanel.Gene_RVDocSum	FLJ40434	FLJ40434	73	2.2	1.2	-0.1	0.5	0.002	0.2	0.015	-0.3	0.1	-0.2	0	0.073	0.38	0.21
http://www.ensembl.org/Homo_sapiens/Variation/Summary?v=rs7531917	rs7531917	rs7531917	1	0.99	0.01	0	0	0.00013	0.34	0.09	0.02	C	T	0.38	http://www.ncbi.nlm.nih.gov/sites/entrez?Db=gene&Cmd=ShowDetailView&TermToSearch=55277&ordinalpos=1&itool=EntrezSystem2.PEntrez.Gene.Gene_ResultsPanel.Gene_RVDocSum	FLJ10986	FLJ10986	68	http://www.ncbi.nlm.nih.gov/sites/entrez?Db=gene&Cmd=ShowDetailView&TermToSearch=729467&ordinalpos=1&itool=EntrezSystem2.PEntrez.Gene.Gene_ResultsPanel.Gene_RVDocSum	LOC729467	LOC729467	81	http://www.ncbi.nlm.nih.gov/sites/entrez?Db=gene&Cmd=ShowDetailView&TermToSearch=391044&ordinalpos=1&itool=EntrezSystem2.PEntrez.Gene.Gene_ResultsPanel.Gene_RVDocSum	LOC391044	LOC391044	228	2.1	0.9	0.2	0	0.0046	0.041	0.11	-0.6	-0.5	-0.5	0.1	0.49	0.72	0.089
http://www.ensembl.org/Homo_sapiens/Variation/Summary?v=rs10858082	rs10858082	rs10858082	1	0.98	0.02	0	0	7e-05	0.28	-0.11	-0.03	G	A	0.46	http://www.ncbi.nlm.nih.gov/sites/entrez?Db=gene&Cmd=ShowDetailView&TermToSearch=1952&ordinalpos=1&itool=EntrezSystem2.PEntrez.Gene.Gene_ResultsPanel.Gene_RVDocSum	CELSR2	CELSR2	0	http://www.ncbi.nlm.nih.gov/sites/entrez?Db=gene&Cmd=ShowDetailView&TermToSearch=6301&ordinalpos=1&itool=EntrezSystem2.PEntrez.Gene.Gene_ResultsPanel.Gene_RVDocSum	SARS	SARS	18	http://www.ncbi.nlm.nih.gov/sites/entrez?Db=gene&Cmd=ShowDetailView&TermToSearch=84722&ordinalpos=1&itool=EntrezSystem2.PEntrez.Gene.Gene_ResultsPanel.Gene_RVDocSum	PSRC1	PSRC1	23	2.4	0.6	0.7	0.1	0.012	0.01	0.086	-0.4	-0.3	-0.4	-0.3	0.37	0.64	0.68
http://www.ensembl.org/Homo_sapiens/Variation/Summary?v=rs6657811	rs6657811	rs6657811	1	0.44	0.54	0	0.03	6.6e-07	0.51	-0.25	-0.03	T	A	0.12	http://www.ncbi.nlm.nih.gov/sites/entrez?Db=gene&Cmd=ShowDetailView&TermToSearch=1952&ordinalpos=1&itool=EntrezSystem2.PEntrez.Gene.Gene_ResultsPanel.Gene_RVDocSum	CELSR2	CELSR2	0	http://www.ncbi.nlm.nih.gov/sites/entrez?Db=gene&Cmd=ShowDetailView&TermToSearch=84722&ordinalpos=1&itool=EntrezSystem2.PEntrez.Gene.Gene_ResultsPanel.Gene_RVDocSum	PSRC1	PSRC1	15	http://www.ncbi.nlm.nih.gov/sites/entrez?Db=gene&Cmd=ShowDetailView&TermToSearch=6301&ordinalpos=1&itool=EntrezSystem2.PEntrez.Gene.Gene_ResultsPanel.Gene_RVDocSum	SARS	SARS	26	4.1	0.4	1.8	0.8	0.028	0.00025	0.0053	-0.3	-0.3	-0.2	0.2	0.85	0.58	0.055
http://www.ensembl.org/Homo_sapiens/Variation/Summary?v=rs4970834	rs4970834	rs4970834	1	0.3	0.67	0	0.03	4.1e-07	0.47	-0.2	-0.03	T	C	0.19	http://www.ncbi.nlm.nih.gov/sites/entrez?Db=gene&Cmd=ShowDetailView&TermToSearch=1952&ordinalpos=1&itool=EntrezSystem2.PEntrez.Gene.Gene_ResultsPanel.Gene_RVDocSum	CELSR2	CELSR2	0	http://www.ncbi.nlm.nih.gov/sites/entrez?Db=gene&Cmd=ShowDetailView&TermToSearch=84722&ordinalpos=1&itool=EntrezSystem2.PEntrez.Gene.Gene_ResultsPanel.Gene_RVDocSum	PSRC1	PSRC1	7	http://www.ncbi.nlm.nih.gov/sites/entrez?Db=gene&Cmd=ShowDetailView&TermToSearch=343263&ordinalpos=1&itool=EntrezSystem2.PEntrez.Gene.Gene_ResultsPanel.Gene_RVDocSum	MYBPHL	MYBPHL	20	4.4	1.5	1.1	0.5	0.00079	0.0028	0.017	-0.4	-0.3	-0.3	0.3	0.89	0.72	0.038
http://www.ensembl.org/Homo_sapiens/Variation/Summary?v=rs611917	rs611917	rs611917	1	0.94	0.05	0	0	2.5e-05	0.074	-0.12	-0.05	G	A	0.29	http://www.ncbi.nlm.nih.gov/sites/entrez?Db=gene&Cmd=ShowDetailView&TermToSearch=1952&ordinalpos=1&itool=EntrezSystem2.PEntrez.Gene.Gene_ResultsPanel.Gene_RVDocSum	CELSR2	CELSR2	0	http://www.ncbi.nlm.nih.gov/sites/entrez?Db=gene&Cmd=ShowDetailView&TermToSearch=84722&ordinalpos=1&itool=EntrezSystem2.PEntrez.Gene.Gene_ResultsPanel.Gene_RVDocSum	PSRC1	PSRC1	7	http://www.ncbi.nlm.nih.gov/sites/entrez?Db=gene&Cmd=ShowDetailView&TermToSearch=343263&ordinalpos=1&itool=EntrezSystem2.PEntrez.Gene.Gene_ResultsPanel.Gene_RVDocSum	MYBPHL	MYBPHL	20	2.8	0.7	0.3	0.9	0.011	0.032	0.0044	0	-0.3	-0.4	0.4	0.37	0.66	0.028
http://www.ensembl.org/Homo_sapiens/Variation/Summary?v=rs7528419	rs7528419	rs7528419	1	0.06	0.9	0	0.04	6.1e-08	0.23	-0.17	-0.04	G	A	0.2	http://www.ncbi.nlm.nih.gov/sites/entrez?Db=gene&Cmd=ShowDetailView&TermToSearch=1952&ordinalpos=1&itool=EntrezSystem2.PEntrez.Gene.Gene_ResultsPanel.Gene_RVDocSum	CELSR2	CELSR2	0	http://www.ncbi.nlm.nih.gov/sites/entrez?Db=gene&Cmd=ShowDetailView&TermToSearch=84722&ordinalpos=1&itool=EntrezSystem2.PEntrez.Gene.Gene_ResultsPanel.Gene_RVDocSum	PSRC1	PSRC1	5	http://www.ncbi.nlm.nih.gov/sites/entrez?Db=gene&Cmd=ShowDetailView&TermToSearch=343263&ordinalpos=1&itool=EntrezSystem2.PEntrez.Gene.Gene_ResultsPanel.Gene_RVDocSum	MYBPHL	MYBPHL	18	5.2	1.7	1.5	0.8	0.00073	0.00088	0.0068	-0.3	-0.5	-0.4	1	0.89	0.85	0.0027
http://www.ensembl.org/Homo_sapiens/Variation/Summary?v=rs12740374	rs12740374	rs12740374	1	0.05	0.91	0	0.04	5.5e-08	0.23	-0.16	-0.04	T	G	0.19	http://www.ncbi.nlm.nih.gov/sites/entrez?Db=gene&Cmd=ShowDetailView&TermToSearch=1952&ordinalpos=1&itool=EntrezSystem2.PEntrez.Gene.Gene_ResultsPanel.Gene_RVDocSum	CELSR2	CELSR2	0	http://www.ncbi.nlm.nih.gov/sites/entrez?Db=gene&Cmd=ShowDetailView&TermToSearch=84722&ordinalpos=1&itool=EntrezSystem2.PEntrez.Gene.Gene_ResultsPanel.Gene_RVDocSum	PSRC1	PSRC1	5	http://www.ncbi.nlm.nih.gov/sites/entrez?Db=gene&Cmd=ShowDetailView&TermToSearch=343263&ordinalpos=1&itool=EntrezSystem2.PEntrez.Gene.Gene_ResultsPanel.Gene_RVDocSum	MYBPHL	MYBPHL	17	5.3	1.7	1.5	0.8	0.00069	0.00087	0.0066	-0.4	-0.5	-0.4	1	0.89	0.85	0.0029
http://www.ensembl.org/Homo_sapiens/Variation/Summary?v=rs660240	rs660240	rs660240	1	0.07	0.89	0	0.04	8.1e-08	0.25	-0.17	-0.04	T	C	0.18	http://www.ncbi.nlm.nih.gov/sites/entrez?Db=gene&Cmd=ShowDetailView&TermToSearch=1952&ordinalpos=1&itool=EntrezSystem2.PEntrez.Gene.Gene_ResultsPanel.Gene_RVDocSum	CELSR2	CELSR2	0	http://www.ncbi.nlm.nih.gov/sites/entrez?Db=gene&Cmd=ShowDetailView&TermToSearch=84722&ordinalpos=1&itool=EntrezSystem2.PEntrez.Gene.Gene_ResultsPanel.Gene_RVDocSum	PSRC1	PSRC1	4	http://www.ncbi.nlm.nih.gov/sites/entrez?Db=gene&Cmd=ShowDetailView&TermToSearch=343263&ordinalpos=1&itool=EntrezSystem2.PEntrez.Gene.Gene_ResultsPanel.Gene_RVDocSum	MYBPHL	MYBPHL	17	5.1	1.7	1.4	0.8	0.00068	0.0013	0.0072	-0.4	-0.4	-0.4	1	0.9	0.81	0.0036
http://www.ensembl.org/Homo_sapiens/Variation/Summary?v=rs629301	rs629301	rs629301	1	0.05	0.91	0	0.04	5.4e-08	0.23	-0.16	-0.03	G	T	0.19	http://www.ncbi.nlm.nih.gov/sites/entrez?Db=gene&Cmd=ShowDetailView&TermToSearch=1952&ordinalpos=1&itool=EntrezSystem2.PEntrez.Gene.Gene_ResultsPanel.Gene_RVDocSum	CELSR2	CELSR2	0	http://www.ncbi.nlm.nih.gov/sites/entrez?Db=gene&Cmd=ShowDetailView&TermToSearch=84722&ordinalpos=1&itool=EntrezSystem2.PEntrez.Gene.Gene_ResultsPanel.Gene_RVDocSum	PSRC1	PSRC1	4	http://www.ncbi.nlm.nih.gov/sites/entrez?Db=gene&Cmd=ShowDetailView&TermToSearch=343263&ordinalpos=1&itool=EntrezSystem2.PEntrez.Gene.Gene_ResultsPanel.Gene_RVDocSum	MYBPHL	MYBPHL	17	5.3	1.7	1.5	0.8	0.00062	0.00089	0.0065	-0.4	-0.5	-0.4	1	0.86	0.85	0.003
http://www.ensembl.org/Homo_sapiens/Variation/Summary?v=rs646776	rs646776	rs646776	1	0.04	0.92	0	0.04	3.7e-08	0.2	-0.16	-0.04	C	T	0.19	http://www.ncbi.nlm.nih.gov/sites/entrez?Db=gene&Cmd=ShowDetailView&TermToSearch=1952&ordinalpos=1&itool=EntrezSystem2.PEntrez.Gene.Gene_ResultsPanel.Gene_RVDocSum	CELSR2	CELSR2	0	http://www.ncbi.nlm.nih.gov/sites/entrez?Db=gene&Cmd=ShowDetailView&TermToSearch=84722&ordinalpos=1&itool=EntrezSystem2.PEntrez.Gene.Gene_ResultsPanel.Gene_RVDocSum	PSRC1	PSRC1	4	http://www.ncbi.nlm.nih.gov/sites/entrez?Db=gene&Cmd=ShowDetailView&TermToSearch=343263&ordinalpos=1&itool=EntrezSystem2.PEntrez.Gene.Gene_ResultsPanel.Gene_RVDocSum	MYBPHL	MYBPHL	16	5.4	1.7	1.6	0.9	0.00062	0.00071	0.0055	-0.3	-0.5	-0.4	1	0.86	0.94	0.0027
http://www.ensembl.org/Homo_sapiens/Variation/Summary?v=rs602633	rs602633	rs602633	1	0.08	0.89	0	0.03	8.4e-08	0.36	-0.17	-0.03	T	G	0.21	http://www.ncbi.nlm.nih.gov/sites/entrez?Db=gene&Cmd=ShowDetailView&TermToSearch=84722&ordinalpos=1&itool=EntrezSystem2.PEntrez.Gene.Gene_ResultsPanel.Gene_RVDocSum	PSRC1	PSRC1	1	http://www.ncbi.nlm.nih.gov/sites/entrez?Db=gene&Cmd=ShowDetailView&TermToSearch=1952&ordinalpos=1&itool=EntrezSystem2.PEntrez.Gene.Gene_ResultsPanel.Gene_RVDocSum	CELSR2	CELSR2	3	http://www.ncbi.nlm.nih.gov/sites/entrez?Db=gene&Cmd=ShowDetailView&TermToSearch=343263&ordinalpos=1&itool=EntrezSystem2.PEntrez.Gene.Gene_ResultsPanel.Gene_RVDocSum	MYBPHL	MYBPHL	13	5.1	1.5	1.5	0.8	0.0011	0.00087	0.0066	-0.5	-0.4	-0.4	0.7	0.88	0.64	0.0086
http://www.ensembl.org/Homo_sapiens/Variation/Summary?v=rs599839	rs599839	rs599839	1	0.06	0.91	0	0.03	6e-08	0.34	-0.16	-0.03	G	A	0.22	http://www.ncbi.nlm.nih.gov/sites/entrez?Db=gene&Cmd=ShowDetailView&TermToSearch=84722&ordinalpos=1&itool=EntrezSystem2.PEntrez.Gene.Gene_ResultsPanel.Gene_RVDocSum	PSRC1	PSRC1	0	http://www.ncbi.nlm.nih.gov/sites/entrez?Db=gene&Cmd=ShowDetailView&TermToSearch=1952&ordinalpos=1&itool=EntrezSystem2.PEntrez.Gene.Gene_ResultsPanel.Gene_RVDocSum	CELSR2	CELSR2	4	http://www.ncbi.nlm.nih.gov/sites/entrez?Db=gene&Cmd=ShowDetailView&TermToSearch=343263&ordinalpos=1&itool=EntrezSystem2.PEntrez.Gene.Gene_ResultsPanel.Gene_RVDocSum	MYBPHL	MYBPHL	13	5.2	1.6	1.6	0.8	0.001	0.00064	0.0063	-0.5	-0.5	-0.4	0.8	0.86	0.67	0.0075
http://www.ensembl.org/Homo_sapiens/Variation/Summary?v=rs1779438	rs1779438	rs1779438	1	0.99	0.01	0	0	0.0008	0.27	-0.08	0.03	C	A	0.39	http://www.ncbi.nlm.nih.gov/sites/entrez?Db=gene&Cmd=ShowDetailView&TermToSearch=6913&ordinalpos=1&itool=EntrezSystem2.PEntrez.Gene.Gene_ResultsPanel.Gene_RVDocSum	TBX15	TBX15	0	http://www.ncbi.nlm.nih.gov/sites/entrez?Db=gene&Cmd=ShowDetailView&TermToSearch=10352&ordinalpos=1&itool=EntrezSystem2.PEntrez.Gene.Gene_ResultsPanel.Gene_RVDocSum	WARS2	WARS2	106	http://www.ncbi.nlm.nih.gov/sites/entrez?Db=gene&Cmd=ShowDetailView&TermToSearch=343492&ordinalpos=1&itool=EntrezSystem2.PEntrez.Gene.Gene_ResultsPanel.Gene_RVDocSum	LOC343492	LOC343492	212	2.1	1	0.3	-0.1	0.0038	0.12	0.35	-0.3	-0.2	-0.4	-0.3	0.13	0.66	0.52
http://www.ensembl.org/Homo_sapiens/Variation/Summary?v=rs1419286	rs1419286	rs1419286	1	0.99	0.01	0	0	0.00095	0.28	-0.08	0.03	C	T	0.39	http://www.ncbi.nlm.nih.gov/sites/entrez?Db=gene&Cmd=ShowDetailView&TermToSearch=6913&ordinalpos=1&itool=EntrezSystem2.PEntrez.Gene.Gene_ResultsPanel.Gene_RVDocSum	TBX15	TBX15	0	http://www.ncbi.nlm.nih.gov/sites/entrez?Db=gene&Cmd=ShowDetailView&TermToSearch=10352&ordinalpos=1&itool=EntrezSystem2.PEntrez.Gene.Gene_ResultsPanel.Gene_RVDocSum	WARS2	WARS2	105	http://www.ncbi.nlm.nih.gov/sites/entrez?Db=gene&Cmd=ShowDetailView&TermToSearch=343492&ordinalpos=1&itool=EntrezSystem2.PEntrez.Gene.Gene_ResultsPanel.Gene_RVDocSum	LOC343492	LOC343492	212	2.1	0.9	0.3	-0.1	0.0048	0.12	0.35	-0.3	-0.2	-0.4	-0.3	0.14	0.65	0.53
http://www.ensembl.org/Homo_sapiens/Variation/Summary?v=rs1331056	rs1331056	rs1331056	1	0.99	0.01	0	0	0.00024	0.2	0.14	-0.05	C	G	0.35	http://www.ncbi.nlm.nih.gov/sites/entrez?Db=gene&Cmd=ShowDetailView&TermToSearch=27185&ordinalpos=1&itool=EntrezSystem2.PEntrez.Gene.Gene_ResultsPanel.Gene_RVDocSum	DISC1	DISC1	2	http://www.ncbi.nlm.nih.gov/sites/entrez?Db=gene&Cmd=ShowDetailView&TermToSearch=27184&ordinalpos=1&itool=EntrezSystem2.PEntrez.Gene.Gene_ResultsPanel.Gene_RVDocSum	DISC2	DISC2	224	http://www.ncbi.nlm.nih.gov/sites/entrez?Db=gene&Cmd=ShowDetailView&TermToSearch=57568&ordinalpos=1&itool=EntrezSystem2.PEntrez.Gene.Gene_ResultsPanel.Gene_RVDocSum	SIPA1L2	SIPA1L2	355	2.1	0.7	-0.1	0.9	0.012	0.19	0.0036	-0.2	-0.3	-0.3	0.3	0.88	0.45	0.045
http://www.ensembl.org/Homo_sapiens/Variation/Summary?v=rs1576618	rs1576618	rs1576618	1	0.53	0.46	0	0.02	1.4e-06	0.23	-0.12	-0.03	T	C	0.42	http://www.ncbi.nlm.nih.gov/sites/entrez?Db=gene&Cmd=ShowDetailView&TermToSearch=27185&ordinalpos=1&itool=EntrezSystem2.PEntrez.Gene.Gene_ResultsPanel.Gene_RVDocSum	DISC1	DISC1	67	http://www.ncbi.nlm.nih.gov/sites/entrez?Db=gene&Cmd=ShowDetailView&TermToSearch=57568&ordinalpos=1&itool=EntrezSystem2.PEntrez.Gene.Gene_ResultsPanel.Gene_RVDocSum	SIPA1L2	SIPA1L2	289	http://www.ncbi.nlm.nih.gov/sites/entrez?Db=gene&Cmd=ShowDetailView&TermToSearch=27184&ordinalpos=1&itool=EntrezSystem2.PEntrez.Gene.Gene_ResultsPanel.Gene_RVDocSum	DISC2	DISC2	290	4	0.5	1.6	1.1	0.014	0.00073	0.0021	-0.4	-0.5	-0.1	-0.3	0.45	0.17	0.76
http://www.ensembl.org/Homo_sapiens/Variation/Summary?v=rs10746514	rs10746514	rs10746514	1	0.51	0.47	0	0.02	1.3e-06	0.23	-0.11	-0.03	A	G	0.42	http://www.ncbi.nlm.nih.gov/sites/entrez?Db=gene&Cmd=ShowDetailView&TermToSearch=27185&ordinalpos=1&itool=EntrezSystem2.PEntrez.Gene.Gene_ResultsPanel.Gene_RVDocSum	DISC1	DISC1	69	http://www.ncbi.nlm.nih.gov/sites/entrez?Db=gene&Cmd=ShowDetailView&TermToSearch=57568&ordinalpos=1&itool=EntrezSystem2.PEntrez.Gene.Gene_ResultsPanel.Gene_RVDocSum	SIPA1L2	SIPA1L2	288	http://www.ncbi.nlm.nih.gov/sites/entrez?Db=gene&Cmd=ShowDetailView&TermToSearch=27184&ordinalpos=1&itool=EntrezSystem2.PEntrez.Gene.Gene_ResultsPanel.Gene_RVDocSum	DISC2	DISC2	292	4	0.5	1.5	1.1	0.013	0.00094	0.0021	-0.5	-0.5	-0.2	-0.3	0.46	0.17	0.75
http://www.ensembl.org/Homo_sapiens/Variation/Summary?v=rs9308486	rs9308486	rs9308486	1	0.93	0.07	0	0	1.9e-05	0.32	-0.1	-0.02	G	A	0.48	http://www.ncbi.nlm.nih.gov/sites/entrez?Db=gene&Cmd=ShowDetailView&TermToSearch=27185&ordinalpos=1&itool=EntrezSystem2.PEntrez.Gene.Gene_ResultsPanel.Gene_RVDocSum	DISC1	DISC1	69	http://www.ncbi.nlm.nih.gov/sites/entrez?Db=gene&Cmd=ShowDetailView&TermToSearch=57568&ordinalpos=1&itool=EntrezSystem2.PEntrez.Gene.Gene_ResultsPanel.Gene_RVDocSum	SIPA1L2	SIPA1L2	287	http://www.ncbi.nlm.nih.gov/sites/entrez?Db=gene&Cmd=ShowDetailView&TermToSearch=27184&ordinalpos=1&itool=EntrezSystem2.PEntrez.Gene.Gene_ResultsPanel.Gene_RVDocSum	DISC2	DISC2	292	2.9	0.4	0.5	1.3	0.02	0.015	0.0012	-0.6	-0.4	-0.4	-0.3	0.31	0.4	0.55
http://www.ensembl.org/Homo_sapiens/Variation/Summary?v=rs9724918	rs9724918	rs9724918	1	0.94	0.05	0	0	2.5e-05	0.32	-0.1	-0.02	T	C	0.48	http://www.ncbi.nlm.nih.gov/sites/entrez?Db=gene&Cmd=ShowDetailView&TermToSearch=27185&ordinalpos=1&itool=EntrezSystem2.PEntrez.Gene.Gene_ResultsPanel.Gene_RVDocSum	DISC1	DISC1	71	http://www.ncbi.nlm.nih.gov/sites/entrez?Db=gene&Cmd=ShowDetailView&TermToSearch=57568&ordinalpos=1&itool=EntrezSystem2.PEntrez.Gene.Gene_ResultsPanel.Gene_RVDocSum	SIPA1L2	SIPA1L2	286	http://www.ncbi.nlm.nih.gov/sites/entrez?Db=gene&Cmd=ShowDetailView&TermToSearch=27184&ordinalpos=1&itool=EntrezSystem2.PEntrez.Gene.Gene_ResultsPanel.Gene_RVDocSum	DISC2	DISC2	294	2.8	0.4	0.6	1.2	0.021	0.013	0.0022	-0.6	-0.5	-0.3	-0.3	0.35	0.38	0.59
http://www.ensembl.org/Homo_sapiens/Variation/Summary?v=rs867844	rs867844	rs867844	1	0.96	0.04	0	0	4.3e-05	0.28	-0.1	-0.03	T	A	0.46	http://www.ncbi.nlm.nih.gov/sites/entrez?Db=gene&Cmd=ShowDetailView&TermToSearch=27185&ordinalpos=1&itool=EntrezSystem2.PEntrez.Gene.Gene_ResultsPanel.Gene_RVDocSum	DISC1	DISC1	89	http://www.ncbi.nlm.nih.gov/sites/entrez?Db=gene&Cmd=ShowDetailView&TermToSearch=57568&ordinalpos=1&itool=EntrezSystem2.PEntrez.Gene.Gene_ResultsPanel.Gene_RVDocSum	SIPA1L2	SIPA1L2	267	http://www.ncbi.nlm.nih.gov/sites/entrez?Db=gene&Cmd=ShowDetailView&TermToSearch=27184&ordinalpos=1&itool=EntrezSystem2.PEntrez.Gene.Gene_ResultsPanel.Gene_RVDocSum	DISC2	DISC2	312	2.6	0	0.8	1.3	0.063	0.0075	0.0015	-0.4	-0.5	-0.3	-0.3	0.49	0.25	0.85
http://www.ensembl.org/Homo_sapiens/Variation/Summary?v=rs1888601	rs1888601	rs1888601	1	0.96	0.03	0	0	4.3e-05	0.26	-0.1	-0.03	C	T	0.46	http://www.ncbi.nlm.nih.gov/sites/entrez?Db=gene&Cmd=ShowDetailView&TermToSearch=27185&ordinalpos=1&itool=EntrezSystem2.PEntrez.Gene.Gene_ResultsPanel.Gene_RVDocSum	DISC1	DISC1	90	http://www.ncbi.nlm.nih.gov/sites/entrez?Db=gene&Cmd=ShowDetailView&TermToSearch=57568&ordinalpos=1&itool=EntrezSystem2.PEntrez.Gene.Gene_ResultsPanel.Gene_RVDocSum	SIPA1L2	SIPA1L2	267	http://www.ncbi.nlm.nih.gov/sites/entrez?Db=gene&Cmd=ShowDetailView&TermToSearch=27184&ordinalpos=1&itool=EntrezSystem2.PEntrez.Gene.Gene_ResultsPanel.Gene_RVDocSum	DISC2	DISC2	313	2.6	0	0.6	1.5	0.064	0.012	0.00065	-0.4	-0.5	-0.3	-0.3	0.49	0.26	0.99
http://www.ensembl.org/Homo_sapiens/Variation/Summary?v=rs10864720	rs10864720	rs10864720	1	0.96	0.04	0	0	4e-05	0.25	-0.1	-0.03	C	T	0.46	http://www.ncbi.nlm.nih.gov/sites/entrez?Db=gene&Cmd=ShowDetailView&TermToSearch=27185&ordinalpos=1&itool=EntrezSystem2.PEntrez.Gene.Gene_ResultsPanel.Gene_RVDocSum	DISC1	DISC1	94	http://www.ncbi.nlm.nih.gov/sites/entrez?Db=gene&Cmd=ShowDetailView&TermToSearch=57568&ordinalpos=1&itool=EntrezSystem2.PEntrez.Gene.Gene_ResultsPanel.Gene_RVDocSum	SIPA1L2	SIPA1L2	262	http://www.ncbi.nlm.nih.gov/sites/entrez?Db=gene&Cmd=ShowDetailView&TermToSearch=27184&ordinalpos=1&itool=EntrezSystem2.PEntrez.Gene.Gene_ResultsPanel.Gene_RVDocSum	DISC2	DISC2	317	2.6	0.1	0.8	1.2	0.053	0.0074	0.0016	-0.4	-0.5	-0.3	-0.3	0.43	0.26	0.85
http://www.ensembl.org/Homo_sapiens/Variation/Summary?v=rs12039526	rs12039526	rs12039526	1	0.97	0.03	0	0	5.1e-05	0.26	-0.1	-0.03	C	T	0.45	http://www.ncbi.nlm.nih.gov/sites/entrez?Db=gene&Cmd=ShowDetailView&TermToSearch=27185&ordinalpos=1&itool=EntrezSystem2.PEntrez.Gene.Gene_ResultsPanel.Gene_RVDocSum	DISC1	DISC1	96	http://www.ncbi.nlm.nih.gov/sites/entrez?Db=gene&Cmd=ShowDetailView&TermToSearch=57568&ordinalpos=1&itool=EntrezSystem2.PEntrez.Gene.Gene_ResultsPanel.Gene_RVDocSum	SIPA1L2	SIPA1L2	261	http://www.ncbi.nlm.nih.gov/sites/entrez?Db=gene&Cmd=ShowDetailView&TermToSearch=27184&ordinalpos=1&itool=EntrezSystem2.PEntrez.Gene.Gene_ResultsPanel.Gene_RVDocSum	DISC2	DISC2	318	2.5	0	0.8	1.1	0.064	0.0075	0.0022	-0.4	-0.5	-0.3	-0.3	0.45	0.25	0.87
http://www.ensembl.org/Homo_sapiens/Variation/Summary?v=rs812811	rs812811	rs812811	2	0.98	0.02	0	0	0.00011	0.85	0.11	-0.01	A	G	0.22	http://www.ncbi.nlm.nih.gov/sites/entrez?Db=gene&Cmd=ShowDetailView&TermToSearch=644232&ordinalpos=1&itool=EntrezSystem2.PEntrez.Gene.Gene_ResultsPanel.Gene_RVDocSum	LOC644232	LOC644232	339	http://www.ncbi.nlm.nih.gov/sites/entrez?Db=gene&Cmd=ShowDetailView&TermToSearch=339789&ordinalpos=1&itool=EntrezSystem2.PEntrez.Gene.Gene_ResultsPanel.Gene_RVDocSum	LOC339789	LOC339789	518	http://www.ncbi.nlm.nih.gov/sites/entrez?Db=gene&Cmd=ShowDetailView&TermToSearch=9781&ordinalpos=1&itool=EntrezSystem2.PEntrez.Gene.Gene_ResultsPanel.Gene_RVDocSum	RNF144	RNF144	645	2.3	2	-0.2	0	0.00023	0.27	0.13	-0.7	-0.4	-0.4	-0.3	0.48	0.53	0.91
http://www.ensembl.org/Homo_sapiens/Variation/Summary?v=rs772438	rs772438	rs772438	2	0.98	0.02	0	0	0.0001	0.85	0.11	-0.01	C	G	0.22	http://www.ncbi.nlm.nih.gov/sites/entrez?Db=gene&Cmd=ShowDetailView&TermToSearch=644232&ordinalpos=1&itool=EntrezSystem2.PEntrez.Gene.Gene_ResultsPanel.Gene_RVDocSum	LOC644232	LOC644232	341	http://www.ncbi.nlm.nih.gov/sites/entrez?Db=gene&Cmd=ShowDetailView&TermToSearch=339789&ordinalpos=1&itool=EntrezSystem2.PEntrez.Gene.Gene_ResultsPanel.Gene_RVDocSum	LOC339789	LOC339789	516	http://www.ncbi.nlm.nih.gov/sites/entrez?Db=gene&Cmd=ShowDetailView&TermToSearch=9781&ordinalpos=1&itool=EntrezSystem2.PEntrez.Gene.Gene_ResultsPanel.Gene_RVDocSum	RNF144	RNF144	647	2.3	2	-0.2	0	0.00023	0.27	0.13	-0.7	-0.4	-0.4	-0.3	0.48	0.52	0.92
http://www.ensembl.org/Homo_sapiens/Variation/Summary?v=rs10495558	rs10495558	rs10495558	2	0.97	0.03	0	0	5.3e-05	0.6	0.12	-0.02	C	T	0.2	http://www.ncbi.nlm.nih.gov/sites/entrez?Db=gene&Cmd=ShowDetailView&TermToSearch=644232&ordinalpos=1&itool=EntrezSystem2.PEntrez.Gene.Gene_ResultsPanel.Gene_RVDocSum	LOC644232	LOC644232	346	http://www.ncbi.nlm.nih.gov/sites/entrez?Db=gene&Cmd=ShowDetailView&TermToSearch=339789&ordinalpos=1&itool=EntrezSystem2.PEntrez.Gene.Gene_ResultsPanel.Gene_RVDocSum	LOC339789	LOC339789	511	http://www.ncbi.nlm.nih.gov/sites/entrez?Db=gene&Cmd=ShowDetailView&TermToSearch=9781&ordinalpos=1&itool=EntrezSystem2.PEntrez.Gene.Gene_ResultsPanel.Gene_RVDocSum	RNF144	RNF144	652	2.6	1.9	-0.2	0.4	0.00026	0.34	0.028	-0.6	-0.4	-0.4	-0.3	0.49	0.75	0.6
http://www.ensembl.org/Homo_sapiens/Variation/Summary?v=rs11896089	rs11896089	rs11896089	2	0.97	0.02	0	0	7.3e-05	0.18	-0.11	0.04	T	A	0.49	http://www.ncbi.nlm.nih.gov/sites/entrez?Db=gene&Cmd=ShowDetailView&TermToSearch=4613&ordinalpos=1&itool=EntrezSystem2.PEntrez.Gene.Gene_ResultsPanel.Gene_RVDocSum	MYCN	MYCN	84	http://www.ncbi.nlm.nih.gov/sites/entrez?Db=gene&Cmd=ShowDetailView&TermToSearch=1653&ordinalpos=1&itool=EntrezSystem2.PEntrez.Gene.Gene_ResultsPanel.Gene_RVDocSum	DDX1	DDX1	400	http://www.ncbi.nlm.nih.gov/sites/entrez?Db=gene&Cmd=ShowDetailView&TermToSearch=51594&ordinalpos=1&itool=EntrezSystem2.PEntrez.Gene.Gene_ResultsPanel.Gene_RVDocSum	NAG	NAG	470	2.5	1.9	0.4	-0.2	0.00032	0.025	0.84	-0.3	-0.2	-0.3	-0.2	0.13	0.97	0.98
http://www.ensembl.org/Homo_sapiens/Variation/Summary?v=rs12619737	rs12619737	rs12619737	2	0.98	0.02	0	0	7.5e-05	0.32	-0.11	-0.03	T	C	0.23	http://www.ncbi.nlm.nih.gov/sites/entrez?Db=gene&Cmd=ShowDetailView&TermToSearch=60526&ordinalpos=1&itool=EntrezSystem2.PEntrez.Gene.Gene_ResultsPanel.Gene_RVDocSum	FLJ21820	FLJ21820	53	http://www.ncbi.nlm.nih.gov/sites/entrez?Db=gene&Cmd=ShowDetailView&TermToSearch=338&ordinalpos=1&itool=EntrezSystem2.PEntrez.Gene.Gene_ResultsPanel.Gene_RVDocSum	APOB	APOB	138	http://www.ncbi.nlm.nih.gov/sites/entrez?Db=gene&Cmd=ShowDetailView&TermToSearch=151449&ordinalpos=1&itool=EntrezSystem2.PEntrez.Gene.Gene_ResultsPanel.Gene_RVDocSum	GDF7	GDF7	205	2.4	1.8	0.7	-0.3	0.00033	0.012	0.88	-0.4	0.2	-0.4	-0.3	0.057	0.79	0.6
http://www.ensembl.org/Homo_sapiens/Variation/Summary?v=rs880973	rs880973	rs880973	2	0.98	0.02	0	0	8.7e-05	0.48	-0.12	-0.02	G	A	0.2	http://www.ncbi.nlm.nih.gov/sites/entrez?Db=gene&Cmd=ShowDetailView&TermToSearch=60526&ordinalpos=1&itool=EntrezSystem2.PEntrez.Gene.Gene_ResultsPanel.Gene_RVDocSum	FLJ21820	FLJ21820	56	http://www.ncbi.nlm.nih.gov/sites/entrez?Db=gene&Cmd=ShowDetailView&TermToSearch=338&ordinalpos=1&itool=EntrezSystem2.PEntrez.Gene.Gene_ResultsPanel.Gene_RVDocSum	APOB	APOB	135	http://www.ncbi.nlm.nih.gov/sites/entrez?Db=gene&Cmd=ShowDetailView&TermToSearch=151449&ordinalpos=1&itool=EntrezSystem2.PEntrez.Gene.Gene_ResultsPanel.Gene_RVDocSum	GDF7	GDF7	208	2.4	1.9	0.6	-0.2	0.00029	0.016	0.93	-0.5	0.1	-0.4	-0.3	0.07	0.66	0.61
http://www.ensembl.org/Homo_sapiens/Variation/Summary?v=rs1437401	rs1437401	rs1437401	2	0.98	0.02	0	0	8.4e-05	0.3	-0.11	-0.03	G	C	0.24	http://www.ncbi.nlm.nih.gov/sites/entrez?Db=gene&Cmd=ShowDetailView&TermToSearch=60526&ordinalpos=1&itool=EntrezSystem2.PEntrez.Gene.Gene_ResultsPanel.Gene_RVDocSum	FLJ21820	FLJ21820	61	http://www.ncbi.nlm.nih.gov/sites/entrez?Db=gene&Cmd=ShowDetailView&TermToSearch=338&ordinalpos=1&itool=EntrezSystem2.PEntrez.Gene.Gene_ResultsPanel.Gene_RVDocSum	APOB	APOB	130	http://www.ncbi.nlm.nih.gov/sites/entrez?Db=gene&Cmd=ShowDetailView&TermToSearch=151449&ordinalpos=1&itool=EntrezSystem2.PEntrez.Gene.Gene_ResultsPanel.Gene_RVDocSum	GDF7	GDF7	213	2.4	1.9	0.6	-0.3	0.00031	0.013	0.86	-0.4	0.2	-0.4	-0.3	0.058	0.84	0.64
http://www.ensembl.org/Homo_sapiens/Variation/Summary?v=rs10199768	rs10199768	rs10199768	2	0.98	0.01	0	0	0.00038	0.049	0.1	0.05	T	G	0.46	http://www.ncbi.nlm.nih.gov/sites/entrez?Db=gene&Cmd=ShowDetailView&TermToSearch=338&ordinalpos=1&itool=EntrezSystem2.PEntrez.Gene.Gene_ResultsPanel.Gene_RVDocSum	APOB	APOB	0	http://www.ncbi.nlm.nih.gov/sites/entrez?Db=gene&Cmd=ShowDetailView&TermToSearch=60526&ordinalpos=1&itool=EntrezSystem2.PEntrez.Gene.Gene_ResultsPanel.Gene_RVDocSum	FLJ21820	FLJ21820	211	http://www.ncbi.nlm.nih.gov/sites/entrez?Db=gene&Cmd=ShowDetailView&TermToSearch=151449&ordinalpos=1&itool=EntrezSystem2.PEntrez.Gene.Gene_ResultsPanel.Gene_RVDocSum	GDF7	GDF7	363	2.2	-0.1	1.6	0	0.24	0.00062	0.12	0.2	0.1	-0.2	-0.2	0.062	0.19	0.86
http://www.ensembl.org/Homo_sapiens/Variation/Summary?v=rs1469513	rs1469513	rs1469513	2	0.98	0.02	0	0	0.00035	0.072	0.1	0.05	C	T	0.43	http://www.ncbi.nlm.nih.gov/sites/entrez?Db=gene&Cmd=ShowDetailView&TermToSearch=338&ordinalpos=1&itool=EntrezSystem2.PEntrez.Gene.Gene_ResultsPanel.Gene_RVDocSum	APOB	APOB	0	http://www.ncbi.nlm.nih.gov/sites/entrez?Db=gene&Cmd=ShowDetailView&TermToSearch=60526&ordinalpos=1&itool=EntrezSystem2.PEntrez.Gene.Gene_ResultsPanel.Gene_RVDocSum	FLJ21820	FLJ21820	227	http://www.ncbi.nlm.nih.gov/sites/entrez?Db=gene&Cmd=ShowDetailView&TermToSearch=151449&ordinalpos=1&itool=EntrezSystem2.PEntrez.Gene.Gene_ResultsPanel.Gene_RVDocSum	GDF7	GDF7	378	2.2	-0.2	1.8	0	0.3	0.00047	0.18	0.1	0.3	-0.3	-0.2	0.041	0.25	0.7
http://www.ensembl.org/Homo_sapiens/Variation/Summary?v=rs531819	rs531819	rs531819	2	0.97	0.03	0	0	5.8e-05	0.56	-0.16	-0.02	T	G	0.14	http://www.ncbi.nlm.nih.gov/sites/entrez?Db=gene&Cmd=ShowDetailView&TermToSearch=338&ordinalpos=1&itool=EntrezSystem2.PEntrez.Gene.Gene_ResultsPanel.Gene_RVDocSum	APOB	APOB	0	http://www.ncbi.nlm.nih.gov/sites/entrez?Db=gene&Cmd=ShowDetailView&TermToSearch=60526&ordinalpos=1&itool=EntrezSystem2.PEntrez.Gene.Gene_ResultsPanel.Gene_RVDocSum	FLJ21820	FLJ21820	231	http://www.ncbi.nlm.nih.gov/sites/entrez?Db=gene&Cmd=ShowDetailView&TermToSearch=151449&ordinalpos=1&itool=EntrezSystem2.PEntrez.Gene.Gene_ResultsPanel.Gene_RVDocSum	GDF7	GDF7	382	2.5	0.1	1.3	0.4	0.099	0.0017	0.039	-0.4	-0.2	-0.3	-0.3	0.49	0.57	0.73
http://www.ensembl.org/Homo_sapiens/Variation/Summary?v=rs12714264	rs12714264	rs12714264	2	0.98	0.02	0	0	9.5e-05	0.49	-0.19	-0.03	T	A	0.12	http://www.ncbi.nlm.nih.gov/sites/entrez?Db=gene&Cmd=ShowDetailView&TermToSearch=338&ordinalpos=1&itool=EntrezSystem2.PEntrez.Gene.Gene_ResultsPanel.Gene_RVDocSum	APOB	APOB	0	http://www.ncbi.nlm.nih.gov/sites/entrez?Db=gene&Cmd=ShowDetailView&TermToSearch=60526&ordinalpos=1&itool=EntrezSystem2.PEntrez.Gene.Gene_ResultsPanel.Gene_RVDocSum	FLJ21820	FLJ21820	233	http://www.ncbi.nlm.nih.gov/sites/entrez?Db=gene&Cmd=ShowDetailView&TermToSearch=151449&ordinalpos=1&itool=EntrezSystem2.PEntrez.Gene.Gene_ResultsPanel.Gene_RVDocSum	GDF7	GDF7	384	2.3	0.1	1.1	0.3	0.097	0.0028	0.046	-0.4	-0.2	-0.2	-0.2	0.51	0.51	0.8
http://www.ensembl.org/Homo_sapiens/Variation/Summary?v=rs585967	rs585967	rs585967	2	0.96	0.04	0	0	4e-05	0.53	-0.16	-0.02	A	C	0.14	http://www.ncbi.nlm.nih.gov/sites/entrez?Db=gene&Cmd=ShowDetailView&TermToSearch=338&ordinalpos=1&itool=EntrezSystem2.PEntrez.Gene.Gene_ResultsPanel.Gene_RVDocSum	APOB	APOB	4	http://www.ncbi.nlm.nih.gov/sites/entrez?Db=gene&Cmd=ShowDetailView&TermToSearch=60526&ordinalpos=1&itool=EntrezSystem2.PEntrez.Gene.Gene_ResultsPanel.Gene_RVDocSum	FLJ21820	FLJ21820	238	http://www.ncbi.nlm.nih.gov/sites/entrez?Db=gene&Cmd=ShowDetailView&TermToSearch=151449&ordinalpos=1&itool=EntrezSystem2.PEntrez.Gene.Gene_ResultsPanel.Gene_RVDocSum	GDF7	GDF7	389	2.7	0.2	1.2	0.5	0.069	0.0022	0.032	-0.4	-0.3	-0.3	-0.3	0.54	0.53	0.77
http://www.ensembl.org/Homo_sapiens/Variation/Summary?v=rs1713222	rs1713222	rs1713222	2	0.96	0.04	0	0	4.4e-05	0.5	-0.16	-0.03	A	G	0.14	http://www.ncbi.nlm.nih.gov/sites/entrez?Db=gene&Cmd=ShowDetailView&TermToSearch=338&ordinalpos=1&itool=EntrezSystem2.PEntrez.Gene.Gene_ResultsPanel.Gene_RVDocSum	APOB	APOB	4	http://www.ncbi.nlm.nih.gov/sites/entrez?Db=gene&Cmd=ShowDetailView&TermToSearch=60526&ordinalpos=1&itool=EntrezSystem2.PEntrez.Gene.Gene_ResultsPanel.Gene_RVDocSum	FLJ21820	FLJ21820	239	http://www.ncbi.nlm.nih.gov/sites/entrez?Db=gene&Cmd=ShowDetailView&TermToSearch=151449&ordinalpos=1&itool=EntrezSystem2.PEntrez.Gene.Gene_ResultsPanel.Gene_RVDocSum	GDF7	GDF7	390	2.6	0.2	1.1	0.5	0.069	0.0029	0.029	-0.4	-0.3	-0.3	-0.3	0.54	0.48	0.77
http://www.ensembl.org/Homo_sapiens/Variation/Summary?v=rs515135	rs515135	rs515135	2	0.89	0.11	0	0	1.1e-05	0.75	-0.16	-0.01	T	C	0.16	http://www.ncbi.nlm.nih.gov/sites/entrez?Db=gene&Cmd=ShowDetailView&TermToSearch=338&ordinalpos=1&itool=EntrezSystem2.PEntrez.Gene.Gene_ResultsPanel.Gene_RVDocSum	APOB	APOB	19	http://www.ncbi.nlm.nih.gov/sites/entrez?Db=gene&Cmd=ShowDetailView&TermToSearch=60526&ordinalpos=1&itool=EntrezSystem2.PEntrez.Gene.Gene_ResultsPanel.Gene_RVDocSum	FLJ21820	FLJ21820	253	http://www.ncbi.nlm.nih.gov/sites/entrez?Db=gene&Cmd=ShowDetailView&TermToSearch=151449&ordinalpos=1&itool=EntrezSystem2.PEntrez.Gene.Gene_ResultsPanel.Gene_RVDocSum	GDF7	GDF7	405	3.1	0.2	1.9	0.4	0.048	0.0003	0.034	-0.4	-0.4	-0.2	-0.2	0.85	0.41	0.45
http://www.ensembl.org/Homo_sapiens/Variation/Summary?v=rs563290	rs563290	rs563290	2	0.89	0.11	0	0	1.1e-05	0.75	-0.16	-0.01	G	A	0.16	http://www.ncbi.nlm.nih.gov/sites/entrez?Db=gene&Cmd=ShowDetailView&TermToSearch=338&ordinalpos=1&itool=EntrezSystem2.PEntrez.Gene.Gene_ResultsPanel.Gene_RVDocSum	APOB	APOB	21	http://www.ncbi.nlm.nih.gov/sites/entrez?Db=gene&Cmd=ShowDetailView&TermToSearch=60526&ordinalpos=1&itool=EntrezSystem2.PEntrez.Gene.Gene_ResultsPanel.Gene_RVDocSum	FLJ21820	FLJ21820	255	http://www.ncbi.nlm.nih.gov/sites/entrez?Db=gene&Cmd=ShowDetailView&TermToSearch=151449&ordinalpos=1&itool=EntrezSystem2.PEntrez.Gene.Gene_ResultsPanel.Gene_RVDocSum	GDF7	GDF7	407	3.1	0.2	1.9	0.4	0.048	0.0003	0.034	-0.4	-0.4	-0.2	-0.2	0.85	0.41	0.45
http://www.ensembl.org/Homo_sapiens/Variation/Summary?v=rs562338	rs562338	rs562338	2	0.89	0.11	0	0	1.1e-05	0.77	-0.16	-0.01	A	G	0.16	http://www.ncbi.nlm.nih.gov/sites/entrez?Db=gene&Cmd=ShowDetailView&TermToSearch=338&ordinalpos=1&itool=EntrezSystem2.PEntrez.Gene.Gene_ResultsPanel.Gene_RVDocSum	APOB	APOB	21	http://www.ncbi.nlm.nih.gov/sites/entrez?Db=gene&Cmd=ShowDetailView&TermToSearch=60526&ordinalpos=1&itool=EntrezSystem2.PEntrez.Gene.Gene_ResultsPanel.Gene_RVDocSum	FLJ21820	FLJ21820	256	http://www.ncbi.nlm.nih.gov/sites/entrez?Db=gene&Cmd=ShowDetailView&TermToSearch=151449&ordinalpos=1&itool=EntrezSystem2.PEntrez.Gene.Gene_ResultsPanel.Gene_RVDocSum	GDF7	GDF7	407	3.1	0.2	1.9	0.4	0.046	0.0003	0.035	-0.4	-0.4	-0.2	-0.2	0.88	0.41	0.45
http://www.ensembl.org/Homo_sapiens/Variation/Summary?v=rs581411	rs581411	rs581411	2	0.89	0.11	0	0	1.1e-05	0.78	-0.16	-0.01	G	A	0.16	http://www.ncbi.nlm.nih.gov/sites/entrez?Db=gene&Cmd=ShowDetailView&TermToSearch=338&ordinalpos=1&itool=EntrezSystem2.PEntrez.Gene.Gene_ResultsPanel.Gene_RVDocSum	APOB	APOB	22	http://www.ncbi.nlm.nih.gov/sites/entrez?Db=gene&Cmd=ShowDetailView&TermToSearch=60526&ordinalpos=1&itool=EntrezSystem2.PEntrez.Gene.Gene_ResultsPanel.Gene_RVDocSum	FLJ21820	FLJ21820	257	http://www.ncbi.nlm.nih.gov/sites/entrez?Db=gene&Cmd=ShowDetailView&TermToSearch=151449&ordinalpos=1&itool=EntrezSystem2.PEntrez.Gene.Gene_ResultsPanel.Gene_RVDocSum	GDF7	GDF7	408	3.1	0.2	1.9	0.4	0.046	0.0003	0.035	-0.4	-0.4	-0.2	-0.2	0.9	0.41	0.45
http://www.ensembl.org/Homo_sapiens/Variation/Summary?v=rs668948	rs668948	rs668948	2	0.89	0.11	0	0	1.1e-05	0.79	-0.16	-0.01	G	A	0.16	http://www.ncbi.nlm.nih.gov/sites/entrez?Db=gene&Cmd=ShowDetailView&TermToSearch=338&ordinalpos=1&itool=EntrezSystem2.PEntrez.Gene.Gene_ResultsPanel.Gene_RVDocSum	APOB	APOB	25	http://www.ncbi.nlm.nih.gov/sites/entrez?Db=gene&Cmd=ShowDetailView&TermToSearch=60526&ordinalpos=1&itool=EntrezSystem2.PEntrez.Gene.Gene_ResultsPanel.Gene_RVDocSum	FLJ21820	FLJ21820	259	http://www.ncbi.nlm.nih.gov/sites/entrez?Db=gene&Cmd=ShowDetailView&TermToSearch=151449&ordinalpos=1&itool=EntrezSystem2.PEntrez.Gene.Gene_ResultsPanel.Gene_RVDocSum	GDF7	GDF7	410	3.1	0.2	1.9	0.4	0.045	0.00029	0.035	-0.4	-0.4	-0.2	-0.2	0.91	0.41	0.44
http://www.ensembl.org/Homo_sapiens/Variation/Summary?v=rs541041	rs541041	rs541041	2	0.85	0.14	0	0.01	7.7e-06	0.91	-0.16	0	G	A	0.16	http://www.ncbi.nlm.nih.gov/sites/entrez?Db=gene&Cmd=ShowDetailView&TermToSearch=338&ordinalpos=1&itool=EntrezSystem2.PEntrez.Gene.Gene_ResultsPanel.Gene_RVDocSum	APOB	APOB	28	http://www.ncbi.nlm.nih.gov/sites/entrez?Db=gene&Cmd=ShowDetailView&TermToSearch=60526&ordinalpos=1&itool=EntrezSystem2.PEntrez.Gene.Gene_ResultsPanel.Gene_RVDocSum	FLJ21820	FLJ21820	262	http://www.ncbi.nlm.nih.gov/sites/entrez?Db=gene&Cmd=ShowDetailView&TermToSearch=151449&ordinalpos=1&itool=EntrezSystem2.PEntrez.Gene.Gene_ResultsPanel.Gene_RVDocSum	GDF7	GDF7	414	3.3	0.3	2	0.4	0.045	0.00023	0.038	-0.4	-0.4	-0.2	-0.2	0.99	0.42	0.36
http://www.ensembl.org/Homo_sapiens/Variation/Summary?v=rs478588	rs478588	rs478588	2	0.91	0.09	0	0	1.4e-05	0.97	-0.14	0	A	G	0.19	http://www.ncbi.nlm.nih.gov/sites/entrez?Db=gene&Cmd=ShowDetailView&TermToSearch=338&ordinalpos=1&itool=EntrezSystem2.PEntrez.Gene.Gene_ResultsPanel.Gene_RVDocSum	APOB	APOB	30	http://www.ncbi.nlm.nih.gov/sites/entrez?Db=gene&Cmd=ShowDetailView&TermToSearch=60526&ordinalpos=1&itool=EntrezSystem2.PEntrez.Gene.Gene_ResultsPanel.Gene_RVDocSum	FLJ21820	FLJ21820	264	http://www.ncbi.nlm.nih.gov/sites/entrez?Db=gene&Cmd=ShowDetailView&TermToSearch=151449&ordinalpos=1&itool=EntrezSystem2.PEntrez.Gene.Gene_ResultsPanel.Gene_RVDocSum	GDF7	GDF7	416	3	0.1	1.9	0.4	0.062	0.00035	0.033	-0.4	-0.4	-0.2	-0.1	0.93	0.56	0.27
http://www.ensembl.org/Homo_sapiens/Variation/Summary?v=rs7567217	rs7567217	rs7567217	2	0.87	0.12	0	0	9.5e-06	0.86	-0.16	-0.01	C	T	0.16	http://www.ncbi.nlm.nih.gov/sites/entrez?Db=gene&Cmd=ShowDetailView&TermToSearch=338&ordinalpos=1&itool=EntrezSystem2.PEntrez.Gene.Gene_ResultsPanel.Gene_RVDocSum	APOB	APOB	37	http://www.ncbi.nlm.nih.gov/sites/entrez?Db=gene&Cmd=ShowDetailView&TermToSearch=60526&ordinalpos=1&itool=EntrezSystem2.PEntrez.Gene.Gene_ResultsPanel.Gene_RVDocSum	FLJ21820	FLJ21820	271	http://www.ncbi.nlm.nih.gov/sites/entrez?Db=gene&Cmd=ShowDetailView&TermToSearch=151449&ordinalpos=1&itool=EntrezSystem2.PEntrez.Gene.Gene_ResultsPanel.Gene_RVDocSum	GDF7	GDF7	422	3.2	0.2	2	0.5	0.055	0.00026	0.032	-0.4	-0.4	-0.2	-0.1	0.86	0.43	0.29
http://www.ensembl.org/Homo_sapiens/Variation/Summary?v=rs568938	rs568938	rs568938	2	0.88	0.12	0	0	1e-05	0.97	-0.14	0	C	T	0.2	http://www.ncbi.nlm.nih.gov/sites/entrez?Db=gene&Cmd=ShowDetailView&TermToSearch=338&ordinalpos=1&itool=EntrezSystem2.PEntrez.Gene.Gene_ResultsPanel.Gene_RVDocSum	APOB	APOB	37	http://www.ncbi.nlm.nih.gov/sites/entrez?Db=gene&Cmd=ShowDetailView&TermToSearch=60526&ordinalpos=1&itool=EntrezSystem2.PEntrez.Gene.Gene_ResultsPanel.Gene_RVDocSum	FLJ21820	FLJ21820	271	http://www.ncbi.nlm.nih.gov/sites/entrez?Db=gene&Cmd=ShowDetailView&TermToSearch=151449&ordinalpos=1&itool=EntrezSystem2.PEntrez.Gene.Gene_ResultsPanel.Gene_RVDocSum	GDF7	GDF7	422	3.2	0.1	1.9	0.5	0.064	0.00029	0.026	-0.4	-0.4	-0.2	-0.1	0.78	0.63	0.29
http://www.ensembl.org/Homo_sapiens/Variation/Summary?v=rs614303	rs614303	rs614303	2	0.88	0.12	0	0	9.8e-06	0.92	-0.14	0	G	A	0.18	http://www.ncbi.nlm.nih.gov/sites/entrez?Db=gene&Cmd=ShowDetailView&TermToSearch=338&ordinalpos=1&itool=EntrezSystem2.PEntrez.Gene.Gene_ResultsPanel.Gene_RVDocSum	APOB	APOB	47	http://www.ncbi.nlm.nih.gov/sites/entrez?Db=gene&Cmd=ShowDetailView&TermToSearch=60526&ordinalpos=1&itool=EntrezSystem2.PEntrez.Gene.Gene_ResultsPanel.Gene_RVDocSum	FLJ21820	FLJ21820	281	http://www.ncbi.nlm.nih.gov/sites/entrez?Db=gene&Cmd=ShowDetailView&TermToSearch=151449&ordinalpos=1&itool=EntrezSystem2.PEntrez.Gene.Gene_ResultsPanel.Gene_RVDocSum	GDF7	GDF7	432	3.2	0.1	2	0.5	0.063	0.00024	0.028	-0.4	-0.4	-0.2	-0.2	0.85	0.52	0.31
http://www.ensembl.org/Homo_sapiens/Variation/Summary?v=rs312944	rs312944	rs312944	2	0.88	0.11	0	0	1.1e-05	0.83	-0.14	-0.01	A	T	0.19	http://www.ncbi.nlm.nih.gov/sites/entrez?Db=gene&Cmd=ShowDetailView&TermToSearch=338&ordinalpos=1&itool=EntrezSystem2.PEntrez.Gene.Gene_ResultsPanel.Gene_RVDocSum	APOB	APOB	58	http://www.ncbi.nlm.nih.gov/sites/entrez?Db=gene&Cmd=ShowDetailView&TermToSearch=60526&ordinalpos=1&itool=EntrezSystem2.PEntrez.Gene.Gene_ResultsPanel.Gene_RVDocSum	FLJ21820	FLJ21820	292	http://www.ncbi.nlm.nih.gov/sites/entrez?Db=gene&Cmd=ShowDetailView&TermToSearch=151449&ordinalpos=1&itool=EntrezSystem2.PEntrez.Gene.Gene_ResultsPanel.Gene_RVDocSum	GDF7	GDF7	444	3.1	0.2	1.9	0.4	0.056	0.00026	0.031	-0.4	-0.4	-0.2	-0.2	0.81	0.46	0.34
http://www.ensembl.org/Homo_sapiens/Variation/Summary?v=rs17399838	rs17399838	rs17399838	2	0.96	0.04	0	0	4.2e-05	0.72	-0.14	-0.01	G	A	0.18	http://www.ncbi.nlm.nih.gov/sites/entrez?Db=gene&Cmd=ShowDetailView&TermToSearch=338&ordinalpos=1&itool=EntrezSystem2.PEntrez.Gene.Gene_ResultsPanel.Gene_RVDocSum	APOB	APOB	101	http://www.ncbi.nlm.nih.gov/sites/entrez?Db=gene&Cmd=ShowDetailView&TermToSearch=60526&ordinalpos=1&itool=EntrezSystem2.PEntrez.Gene.Gene_ResultsPanel.Gene_RVDocSum	FLJ21820	FLJ21820	335	http://www.ncbi.nlm.nih.gov/sites/entrez?Db=gene&Cmd=ShowDetailView&TermToSearch=151449&ordinalpos=1&itool=EntrezSystem2.PEntrez.Gene.Gene_ResultsPanel.Gene_RVDocSum	GDF7	GDF7	487	2.6	0.3	1.4	0.4	0.043	0.0014	0.045	-0.5	-0.4	-0.3	-0.1	0.6	0.4	0.21
http://www.ensembl.org/Homo_sapiens/Variation/Summary?v=rs312970	rs312970	rs312970	2	0.94	0.05	0	0	2.7e-05	0.84	-0.12	-0.01	A	T	0.2	http://www.ncbi.nlm.nih.gov/sites/entrez?Db=gene&Cmd=ShowDetailView&TermToSearch=338&ordinalpos=1&itool=EntrezSystem2.PEntrez.Gene.Gene_ResultsPanel.Gene_RVDocSum	APOB	APOB	103	http://www.ncbi.nlm.nih.gov/sites/entrez?Db=gene&Cmd=ShowDetailView&TermToSearch=60526&ordinalpos=1&itool=EntrezSystem2.PEntrez.Gene.Gene_ResultsPanel.Gene_RVDocSum	FLJ21820	FLJ21820	337	http://www.ncbi.nlm.nih.gov/sites/entrez?Db=gene&Cmd=ShowDetailView&TermToSearch=151449&ordinalpos=1&itool=EntrezSystem2.PEntrez.Gene.Gene_ResultsPanel.Gene_RVDocSum	GDF7	GDF7	489	2.8	0.1	1.8	0.4	0.073	0.00037	0.034	-0.5	-0.5	-0.3	-0.2	0.78	0.49	0.31
http://www.ensembl.org/Homo_sapiens/Variation/Summary?v=rs837137	rs837137	rs837137	2	0.94	0.05	0	0	2.7e-05	0.83	-0.12	-0.01	A	G	0.2	http://www.ncbi.nlm.nih.gov/sites/entrez?Db=gene&Cmd=ShowDetailView&TermToSearch=338&ordinalpos=1&itool=EntrezSystem2.PEntrez.Gene.Gene_ResultsPanel.Gene_RVDocSum	APOB	APOB	111	http://www.ncbi.nlm.nih.gov/sites/entrez?Db=gene&Cmd=ShowDetailView&TermToSearch=60526&ordinalpos=1&itool=EntrezSystem2.PEntrez.Gene.Gene_ResultsPanel.Gene_RVDocSum	FLJ21820	FLJ21820	345	http://www.ncbi.nlm.nih.gov/sites/entrez?Db=gene&Cmd=ShowDetailView&TermToSearch=151449&ordinalpos=1&itool=EntrezSystem2.PEntrez.Gene.Gene_ResultsPanel.Gene_RVDocSum	GDF7	GDF7	497	2.8	0.1	1.9	0.4	0.077	0.00031	0.039	-0.5	-0.5	-0.2	-0.1	0.77	0.45	0.27
http://www.ensembl.org/Homo_sapiens/Variation/Summary?v=rs312985	rs312985	rs312985	2	0.94	0.06	0	0	2.5e-05	0.86	-0.12	-0.01	A	G	0.2	http://www.ncbi.nlm.nih.gov/sites/entrez?Db=gene&Cmd=ShowDetailView&TermToSearch=338&ordinalpos=1&itool=EntrezSystem2.PEntrez.Gene.Gene_ResultsPanel.Gene_RVDocSum	APOB	APOB	112	http://www.ncbi.nlm.nih.gov/sites/entrez?Db=gene&Cmd=ShowDetailView&TermToSearch=60526&ordinalpos=1&itool=EntrezSystem2.PEntrez.Gene.Gene_ResultsPanel.Gene_RVDocSum	FLJ21820	FLJ21820	346	http://www.ncbi.nlm.nih.gov/sites/entrez?Db=gene&Cmd=ShowDetailView&TermToSearch=151449&ordinalpos=1&itool=EntrezSystem2.PEntrez.Gene.Gene_ResultsPanel.Gene_RVDocSum	GDF7	GDF7	498	2.8	0.1	1.9	0.3	0.073	0.00029	0.042	-0.5	-0.5	-0.2	-0.1	0.8	0.46	0.26
http://www.ensembl.org/Homo_sapiens/Variation/Summary?v=rs532300	rs532300	rs532300	2	0.93	0.07	0	0	2e-05	0.88	-0.13	0	C	A	0.2	http://www.ncbi.nlm.nih.gov/sites/entrez?Db=gene&Cmd=ShowDetailView&TermToSearch=338&ordinalpos=1&itool=EntrezSystem2.PEntrez.Gene.Gene_ResultsPanel.Gene_RVDocSum	APOB	APOB	115	http://www.ncbi.nlm.nih.gov/sites/entrez?Db=gene&Cmd=ShowDetailView&TermToSearch=60526&ordinalpos=1&itool=EntrezSystem2.PEntrez.Gene.Gene_ResultsPanel.Gene_RVDocSum	FLJ21820	FLJ21820	349	http://www.ncbi.nlm.nih.gov/sites/entrez?Db=gene&Cmd=ShowDetailView&TermToSearch=151449&ordinalpos=1&itool=EntrezSystem2.PEntrez.Gene.Gene_ResultsPanel.Gene_RVDocSum	GDF7	GDF7	500	2.9	0.1	1.9	0.4	0.068	0.00027	0.038	-0.5	-0.5	-0.2	-0.1	0.81	0.46	0.25
http://www.ensembl.org/Homo_sapiens/Variation/Summary?v=rs527034	rs527034	rs527034	2	0.93	0.07	0	0	2e-05	0.88	-0.13	0	C	A	0.2	http://www.ncbi.nlm.nih.gov/sites/entrez?Db=gene&Cmd=ShowDetailView&TermToSearch=338&ordinalpos=1&itool=EntrezSystem2.PEntrez.Gene.Gene_ResultsPanel.Gene_RVDocSum	APOB	APOB	116	http://www.ncbi.nlm.nih.gov/sites/entrez?Db=gene&Cmd=ShowDetailView&TermToSearch=60526&ordinalpos=1&itool=EntrezSystem2.PEntrez.Gene.Gene_ResultsPanel.Gene_RVDocSum	FLJ21820	FLJ21820	350	http://www.ncbi.nlm.nih.gov/sites/entrez?Db=gene&Cmd=ShowDetailView&TermToSearch=151449&ordinalpos=1&itool=EntrezSystem2.PEntrez.Gene.Gene_ResultsPanel.Gene_RVDocSum	GDF7	GDF7	502	2.9	0.1	1.9	0.4	0.066	0.00027	0.038	-0.5	-0.5	-0.2	-0.1	0.82	0.46	0.25
http://www.ensembl.org/Homo_sapiens/Variation/Summary?v=rs4560142	rs4560142	rs4560142	2	0.93	0.07	0	0	2e-05	0.91	-0.13	0	C	T	0.21	http://www.ncbi.nlm.nih.gov/sites/entrez?Db=gene&Cmd=ShowDetailView&TermToSearch=338&ordinalpos=1&itool=EntrezSystem2.PEntrez.Gene.Gene_ResultsPanel.Gene_RVDocSum	APOB	APOB	117	http://www.ncbi.nlm.nih.gov/sites/entrez?Db=gene&Cmd=ShowDetailView&TermToSearch=60526&ordinalpos=1&itool=EntrezSystem2.PEntrez.Gene.Gene_ResultsPanel.Gene_RVDocSum	FLJ21820	FLJ21820	351	http://www.ncbi.nlm.nih.gov/sites/entrez?Db=gene&Cmd=ShowDetailView&TermToSearch=151449&ordinalpos=1&itool=EntrezSystem2.PEntrez.Gene.Gene_ResultsPanel.Gene_RVDocSum	GDF7	GDF7	502	2.9	0.1	1.9	0.4	0.061	0.00028	0.038	-0.5	-0.5	-0.3	-0.1	0.84	0.47	0.25
http://www.ensembl.org/Homo_sapiens/Variation/Summary?v=rs4591370	rs4591370	rs4591370	2	0.93	0.07	0	0	2e-05	0.9	-0.13	0	A	G	0.21	http://www.ncbi.nlm.nih.gov/sites/entrez?Db=gene&Cmd=ShowDetailView&TermToSearch=338&ordinalpos=1&itool=EntrezSystem2.PEntrez.Gene.Gene_ResultsPanel.Gene_RVDocSum	APOB	APOB	117	http://www.ncbi.nlm.nih.gov/sites/entrez?Db=gene&Cmd=ShowDetailView&TermToSearch=60526&ordinalpos=1&itool=EntrezSystem2.PEntrez.Gene.Gene_ResultsPanel.Gene_RVDocSum	FLJ21820	FLJ21820	351	http://www.ncbi.nlm.nih.gov/sites/entrez?Db=gene&Cmd=ShowDetailView&TermToSearch=151449&ordinalpos=1&itool=EntrezSystem2.PEntrez.Gene.Gene_ResultsPanel.Gene_RVDocSum	GDF7	GDF7	503	2.9	0.1	1.9	0.4	0.06	0.00029	0.038	-0.5	-0.5	-0.3	-0.1	0.84	0.47	0.25
http://www.ensembl.org/Homo_sapiens/Variation/Summary?v=rs1652421	rs1652421	rs1652421	2	0.92	0.08	0	0	1.7e-05	0.93	-0.13	0	A	G	0.2	http://www.ncbi.nlm.nih.gov/sites/entrez?Db=gene&Cmd=ShowDetailView&TermToSearch=338&ordinalpos=1&itool=EntrezSystem2.PEntrez.Gene.Gene_ResultsPanel.Gene_RVDocSum	APOB	APOB	117	http://www.ncbi.nlm.nih.gov/sites/entrez?Db=gene&Cmd=ShowDetailView&TermToSearch=60526&ordinalpos=1&itool=EntrezSystem2.PEntrez.Gene.Gene_ResultsPanel.Gene_RVDocSum	FLJ21820	FLJ21820	351	http://www.ncbi.nlm.nih.gov/sites/entrez?Db=gene&Cmd=ShowDetailView&TermToSearch=151449&ordinalpos=1&itool=EntrezSystem2.PEntrez.Gene.Gene_ResultsPanel.Gene_RVDocSum	GDF7	GDF7	503	3	0.2	1.9	0.4	0.055	0.00028	0.038	-0.5	-0.5	-0.3	-0.1	0.87	0.48	0.25
http://www.ensembl.org/Homo_sapiens/Variation/Summary?v=rs1652420	rs1652420	rs1652420	2	0.91	0.08	0	0	1.6e-05	0.93	-0.13	0	A	T	0.21	http://www.ncbi.nlm.nih.gov/sites/entrez?Db=gene&Cmd=ShowDetailView&TermToSearch=338&ordinalpos=1&itool=EntrezSystem2.PEntrez.Gene.Gene_ResultsPanel.Gene_RVDocSum	APOB	APOB	117	http://www.ncbi.nlm.nih.gov/sites/entrez?Db=gene&Cmd=ShowDetailView&TermToSearch=60526&ordinalpos=1&itool=EntrezSystem2.PEntrez.Gene.Gene_ResultsPanel.Gene_RVDocSum	FLJ21820	FLJ21820	351	http://www.ncbi.nlm.nih.gov/sites/entrez?Db=gene&Cmd=ShowDetailView&TermToSearch=151449&ordinalpos=1&itool=EntrezSystem2.PEntrez.Gene.Gene_ResultsPanel.Gene_RVDocSum	GDF7	GDF7	503	3	0.2	1.9	0.4	0.054	0.00027	0.036	-0.5	-0.5	-0.3	-0.1	0.87	0.47	0.25
http://www.ensembl.org/Homo_sapiens/Variation/Summary?v=rs1712247	rs1712247	rs1712247	2	0.91	0.09	0	0	1.5e-05	0.94	-0.13	0	C	T	0.21	http://www.ncbi.nlm.nih.gov/sites/entrez?Db=gene&Cmd=ShowDetailView&TermToSearch=338&ordinalpos=1&itool=EntrezSystem2.PEntrez.Gene.Gene_ResultsPanel.Gene_RVDocSum	APOB	APOB	117	http://www.ncbi.nlm.nih.gov/sites/entrez?Db=gene&Cmd=ShowDetailView&TermToSearch=60526&ordinalpos=1&itool=EntrezSystem2.PEntrez.Gene.Gene_ResultsPanel.Gene_RVDocSum	FLJ21820	FLJ21820	351	http://www.ncbi.nlm.nih.gov/sites/entrez?Db=gene&Cmd=ShowDetailView&TermToSearch=151449&ordinalpos=1&itool=EntrezSystem2.PEntrez.Gene.Gene_ResultsPanel.Gene_RVDocSum	GDF7	GDF7	503	3	0.2	1.9	0.4	0.051	0.00027	0.035	-0.5	-0.5	-0.3	-0.1	0.89	0.47	0.25
http://www.ensembl.org/Homo_sapiens/Variation/Summary?v=rs548506	rs548506	rs548506	2	0.91	0.09	0	0	1.5e-05	0.9	-0.14	0	A	G	0.2	http://www.ncbi.nlm.nih.gov/sites/entrez?Db=gene&Cmd=ShowDetailView&TermToSearch=338&ordinalpos=1&itool=EntrezSystem2.PEntrez.Gene.Gene_ResultsPanel.Gene_RVDocSum	APOB	APOB	119	http://www.ncbi.nlm.nih.gov/sites/entrez?Db=gene&Cmd=ShowDetailView&TermToSearch=60526&ordinalpos=1&itool=EntrezSystem2.PEntrez.Gene.Gene_ResultsPanel.Gene_RVDocSum	FLJ21820	FLJ21820	353	http://www.ncbi.nlm.nih.gov/sites/entrez?Db=gene&Cmd=ShowDetailView&TermToSearch=151449&ordinalpos=1&itool=EntrezSystem2.PEntrez.Gene.Gene_ResultsPanel.Gene_RVDocSum	GDF7	GDF7	504	3	0.3	1.8	0.4	0.035	0.00033	0.034	-0.5	-0.5	-0.2	-0.1	0.94	0.52	0.25
http://www.ensembl.org/Homo_sapiens/Variation/Summary?v=rs1652419	rs1652419	rs1652419	2	0.88	0.11	0	0	1e-05	0.97	-0.14	0	C	T	0.19	http://www.ncbi.nlm.nih.gov/sites/entrez?Db=gene&Cmd=ShowDetailView&TermToSearch=338&ordinalpos=1&itool=EntrezSystem2.PEntrez.Gene.Gene_ResultsPanel.Gene_RVDocSum	APOB	APOB	119	http://www.ncbi.nlm.nih.gov/sites/entrez?Db=gene&Cmd=ShowDetailView&TermToSearch=60526&ordinalpos=1&itool=EntrezSystem2.PEntrez.Gene.Gene_ResultsPanel.Gene_RVDocSum	FLJ21820	FLJ21820	353	http://www.ncbi.nlm.nih.gov/sites/entrez?Db=gene&Cmd=ShowDetailView&TermToSearch=151449&ordinalpos=1&itool=EntrezSystem2.PEntrez.Gene.Gene_ResultsPanel.Gene_RVDocSum	GDF7	GDF7	504	3.2	0.3	1.9	0.4	0.031	0.00024	0.031	-0.5	-0.5	-0.3	-0.1	0.95	0.55	0.25
http://www.ensembl.org/Homo_sapiens/Variation/Summary?v=rs1712250	rs1712250	rs1712250	2	0.88	0.12	0	0	1e-05	0.96	-0.14	0	C	T	0.19	http://www.ncbi.nlm.nih.gov/sites/entrez?Db=gene&Cmd=ShowDetailView&TermToSearch=338&ordinalpos=1&itool=EntrezSystem2.PEntrez.Gene.Gene_ResultsPanel.Gene_RVDocSum	APOB	APOB	119	http://www.ncbi.nlm.nih.gov/sites/entrez?Db=gene&Cmd=ShowDetailView&TermToSearch=60526&ordinalpos=1&itool=EntrezSystem2.PEntrez.Gene.Gene_ResultsPanel.Gene_RVDocSum	FLJ21820	FLJ21820	353	http://www.ncbi.nlm.nih.gov/sites/entrez?Db=gene&Cmd=ShowDetailView&TermToSearch=151449&ordinalpos=1&itool=EntrezSystem2.PEntrez.Gene.Gene_ResultsPanel.Gene_RVDocSum	GDF7	GDF7	505	3.2	0.3	1.9	0.4	0.03	0.00024	0.032	-0.5	-0.5	-0.3	-0.1	0.97	0.55	0.25
http://www.ensembl.org/Homo_sapiens/Variation/Summary?v=rs1367120	rs1367120	rs1367120	2	0.88	0.12	0	0	1e-05	0.95	-0.14	0	T	C	0.19	http://www.ncbi.nlm.nih.gov/sites/entrez?Db=gene&Cmd=ShowDetailView&TermToSearch=338&ordinalpos=1&itool=EntrezSystem2.PEntrez.Gene.Gene_ResultsPanel.Gene_RVDocSum	APOB	APOB	119	http://www.ncbi.nlm.nih.gov/sites/entrez?Db=gene&Cmd=ShowDetailView&TermToSearch=60526&ordinalpos=1&itool=EntrezSystem2.PEntrez.Gene.Gene_ResultsPanel.Gene_RVDocSum	FLJ21820	FLJ21820	354	http://www.ncbi.nlm.nih.gov/sites/entrez?Db=gene&Cmd=ShowDetailView&TermToSearch=151449&ordinalpos=1&itool=EntrezSystem2.PEntrez.Gene.Gene_ResultsPanel.Gene_RVDocSum	GDF7	GDF7	505	3.2	0.3	1.9	0.4	0.029	0.00024	0.032	-0.5	-0.5	-0.3	-0.1	0.98	0.55	0.25
http://www.ensembl.org/Homo_sapiens/Variation/Summary?v=rs1367119	rs1367119	rs1367119	2	0.88	0.11	0	0	1e-05	0.93	-0.14	0	A	G	0.18	http://www.ncbi.nlm.nih.gov/sites/entrez?Db=gene&Cmd=ShowDetailView&TermToSearch=338&ordinalpos=1&itool=EntrezSystem2.PEntrez.Gene.Gene_ResultsPanel.Gene_RVDocSum	APOB	APOB	119	http://www.ncbi.nlm.nih.gov/sites/entrez?Db=gene&Cmd=ShowDetailView&TermToSearch=60526&ordinalpos=1&itool=EntrezSystem2.PEntrez.Gene.Gene_ResultsPanel.Gene_RVDocSum	FLJ21820	FLJ21820	354	http://www.ncbi.nlm.nih.gov/sites/entrez?Db=gene&Cmd=ShowDetailView&TermToSearch=151449&ordinalpos=1&itool=EntrezSystem2.PEntrez.Gene.Gene_ResultsPanel.Gene_RVDocSum	GDF7	GDF7	505	3.2	0.3	2	0.4	0.03	0.0002	0.031	-0.5	-0.5	-0.3	-0.1	0.98	0.56	0.24
http://www.ensembl.org/Homo_sapiens/Variation/Summary?v=rs522963	rs522963	rs522963	2	0.88	0.11	0	0	1e-05	0.96	-0.14	0	T	C	0.2	http://www.ncbi.nlm.nih.gov/sites/entrez?Db=gene&Cmd=ShowDetailView&TermToSearch=338&ordinalpos=1&itool=EntrezSystem2.PEntrez.Gene.Gene_ResultsPanel.Gene_RVDocSum	APOB	APOB	120	http://www.ncbi.nlm.nih.gov/sites/entrez?Db=gene&Cmd=ShowDetailView&TermToSearch=60526&ordinalpos=1&itool=EntrezSystem2.PEntrez.Gene.Gene_ResultsPanel.Gene_RVDocSum	FLJ21820	FLJ21820	354	http://www.ncbi.nlm.nih.gov/sites/entrez?Db=gene&Cmd=ShowDetailView&TermToSearch=151449&ordinalpos=1&itool=EntrezSystem2.PEntrez.Gene.Gene_ResultsPanel.Gene_RVDocSum	GDF7	GDF7	506	3.2	0.3	2	0.4	0.039	0.00021	0.033	-0.5	-0.5	-0.3	-0.1	0.99	0.47	0.24
http://www.ensembl.org/Homo_sapiens/Variation/Summary?v=rs522250	rs522250	rs522250	2	0.89	0.1	0	0	1.2e-05	0.86	-0.15	0.01	T	C	0.18	http://www.ncbi.nlm.nih.gov/sites/entrez?Db=gene&Cmd=ShowDetailView&TermToSearch=338&ordinalpos=1&itool=EntrezSystem2.PEntrez.Gene.Gene_ResultsPanel.Gene_RVDocSum	APOB	APOB	120	http://www.ncbi.nlm.nih.gov/sites/entrez?Db=gene&Cmd=ShowDetailView&TermToSearch=60526&ordinalpos=1&itool=EntrezSystem2.PEntrez.Gene.Gene_ResultsPanel.Gene_RVDocSum	FLJ21820	FLJ21820	354	http://www.ncbi.nlm.nih.gov/sites/entrez?Db=gene&Cmd=ShowDetailView&TermToSearch=151449&ordinalpos=1&itool=EntrezSystem2.PEntrez.Gene.Gene_ResultsPanel.Gene_RVDocSum	GDF7	GDF7	506	3.1	0.4	1.9	0.4	0.025	0.00023	0.032	-0.5	-0.5	-0.3	-0.1	0.93	0.56	0.23
http://www.ensembl.org/Homo_sapiens/Variation/Summary?v=rs529697	rs529697	rs529697	2	0.93	0.07	0	0	1.8e-05	0.99	-0.14	0	G	T	0.19	http://www.ncbi.nlm.nih.gov/sites/entrez?Db=gene&Cmd=ShowDetailView&TermToSearch=338&ordinalpos=1&itool=EntrezSystem2.PEntrez.Gene.Gene_ResultsPanel.Gene_RVDocSum	APOB	APOB	121	http://www.ncbi.nlm.nih.gov/sites/entrez?Db=gene&Cmd=ShowDetailView&TermToSearch=60526&ordinalpos=1&itool=EntrezSystem2.PEntrez.Gene.Gene_ResultsPanel.Gene_RVDocSum	FLJ21820	FLJ21820	355	http://www.ncbi.nlm.nih.gov/sites/entrez?Db=gene&Cmd=ShowDetailView&TermToSearch=151449&ordinalpos=1&itool=EntrezSystem2.PEntrez.Gene.Gene_ResultsPanel.Gene_RVDocSum	GDF7	GDF7	507	2.9	0.2	1.9	0.4	0.042	0.00028	0.033	-0.5	-0.5	-0.2	-0.1	0.99	0.42	0.25
http://www.ensembl.org/Homo_sapiens/Variation/Summary?v=rs1652418	rs1652418	rs1652418	2	0.93	0.06	0	0	2.2e-05	0.96	-0.14	0	T	C	0.18	http://www.ncbi.nlm.nih.gov/sites/entrez?Db=gene&Cmd=ShowDetailView&TermToSearch=338&ordinalpos=1&itool=EntrezSystem2.PEntrez.Gene.Gene_ResultsPanel.Gene_RVDocSum	APOB	APOB	122	http://www.ncbi.nlm.nih.gov/sites/entrez?Db=gene&Cmd=ShowDetailView&TermToSearch=60526&ordinalpos=1&itool=EntrezSystem2.PEntrez.Gene.Gene_ResultsPanel.Gene_RVDocSum	FLJ21820	FLJ21820	356	http://www.ncbi.nlm.nih.gov/sites/entrez?Db=gene&Cmd=ShowDetailView&TermToSearch=151449&ordinalpos=1&itool=EntrezSystem2.PEntrez.Gene.Gene_ResultsPanel.Gene_RVDocSum	GDF7	GDF7	507	2.9	0.3	1.8	0.4	0.032	0.00034	0.029	-0.5	-0.5	-0.2	-0.1	0.97	0.48	0.27
http://www.ensembl.org/Homo_sapiens/Variation/Summary?v=rs538928	rs538928	rs538928	2	0.93	0.07	0	0	1.9e-05	0.97	-0.14	0	A	G	0.19	http://www.ncbi.nlm.nih.gov/sites/entrez?Db=gene&Cmd=ShowDetailView&TermToSearch=338&ordinalpos=1&itool=EntrezSystem2.PEntrez.Gene.Gene_ResultsPanel.Gene_RVDocSum	APOB	APOB	122	http://www.ncbi.nlm.nih.gov/sites/entrez?Db=gene&Cmd=ShowDetailView&TermToSearch=60526&ordinalpos=1&itool=EntrezSystem2.PEntrez.Gene.Gene_ResultsPanel.Gene_RVDocSum	FLJ21820	FLJ21820	356	http://www.ncbi.nlm.nih.gov/sites/entrez?Db=gene&Cmd=ShowDetailView&TermToSearch=151449&ordinalpos=1&itool=EntrezSystem2.PEntrez.Gene.Gene_ResultsPanel.Gene_RVDocSum	GDF7	GDF7	508	2.9	0.2	1.8	0.4	0.042	0.00033	0.032	-0.5	-0.5	-0.2	-0.1	0.97	0.39	0.26
http://www.ensembl.org/Homo_sapiens/Variation/Summary?v=rs560844	rs560844	rs560844	2	0.95	0.05	0	0	3e-05	0.97	-0.14	0	A	G	0.18	http://www.ncbi.nlm.nih.gov/sites/entrez?Db=gene&Cmd=ShowDetailView&TermToSearch=338&ordinalpos=1&itool=EntrezSystem2.PEntrez.Gene.Gene_ResultsPanel.Gene_RVDocSum	APOB	APOB	122	http://www.ncbi.nlm.nih.gov/sites/entrez?Db=gene&Cmd=ShowDetailView&TermToSearch=60526&ordinalpos=1&itool=EntrezSystem2.PEntrez.Gene.Gene_ResultsPanel.Gene_RVDocSum	FLJ21820	FLJ21820	356	http://www.ncbi.nlm.nih.gov/sites/entrez?Db=gene&Cmd=ShowDetailView&TermToSearch=151449&ordinalpos=1&itool=EntrezSystem2.PEntrez.Gene.Gene_ResultsPanel.Gene_RVDocSum	GDF7	GDF7	508	2.8	0.3	1.7	0.4	0.032	0.0004	0.031	-0.5	-0.5	-0.2	-0.1	0.97	0.47	0.27
http://www.ensembl.org/Homo_sapiens/Variation/Summary?v=rs563696	rs563696	rs563696	2	0.95	0.05	0	0	2.9e-05	0.98	-0.14	0	T	A	0.18	http://www.ncbi.nlm.nih.gov/sites/entrez?Db=gene&Cmd=ShowDetailView&TermToSearch=338&ordinalpos=1&itool=EntrezSystem2.PEntrez.Gene.Gene_ResultsPanel.Gene_RVDocSum	APOB	APOB	122	http://www.ncbi.nlm.nih.gov/sites/entrez?Db=gene&Cmd=ShowDetailView&TermToSearch=60526&ordinalpos=1&itool=EntrezSystem2.PEntrez.Gene.Gene_ResultsPanel.Gene_RVDocSum	FLJ21820	FLJ21820	357	http://www.ncbi.nlm.nih.gov/sites/entrez?Db=gene&Cmd=ShowDetailView&TermToSearch=151449&ordinalpos=1&itool=EntrezSystem2.PEntrez.Gene.Gene_ResultsPanel.Gene_RVDocSum	GDF7	GDF7	508	2.8	0.3	1.7	0.4	0.031	0.0004	0.031	-0.5	-0.5	-0.2	-0.1	0.98	0.47	0.27
http://www.ensembl.org/Homo_sapiens/Variation/Summary?v=rs4635554	rs4635554	rs4635554	2	0.97	0.03	0	0	6.4e-05	0.67	0.14	0.02	G	T	0.37	http://www.ncbi.nlm.nih.gov/sites/entrez?Db=gene&Cmd=ShowDetailView&TermToSearch=338&ordinalpos=1&itool=EntrezSystem2.PEntrez.Gene.Gene_ResultsPanel.Gene_RVDocSum	APOB	APOB	123	http://www.ncbi.nlm.nih.gov/sites/entrez?Db=gene&Cmd=ShowDetailView&TermToSearch=60526&ordinalpos=1&itool=EntrezSystem2.PEntrez.Gene.Gene_ResultsPanel.Gene_RVDocSum	FLJ21820	FLJ21820	357	http://www.ncbi.nlm.nih.gov/sites/entrez?Db=gene&Cmd=ShowDetailView&TermToSearch=151449&ordinalpos=1&itool=EntrezSystem2.PEntrez.Gene.Gene_ResultsPanel.Gene_RVDocSum	GDF7	GDF7	508	2.5	0.2	1.5	0.3	0.055	0.0011	0.033	-0.5	0	-0.3	0.1	0.11	0.71	0.12
http://www.ensembl.org/Homo_sapiens/Variation/Summary?v=rs479545	rs479545	rs479545	2	0.95	0.05	0	0	3.2e-05	1	-0.15	0	T	C	0.16	http://www.ncbi.nlm.nih.gov/sites/entrez?Db=gene&Cmd=ShowDetailView&TermToSearch=338&ordinalpos=1&itool=EntrezSystem2.PEntrez.Gene.Gene_ResultsPanel.Gene_RVDocSum	APOB	APOB	123	http://www.ncbi.nlm.nih.gov/sites/entrez?Db=gene&Cmd=ShowDetailView&TermToSearch=60526&ordinalpos=1&itool=EntrezSystem2.PEntrez.Gene.Gene_ResultsPanel.Gene_RVDocSum	FLJ21820	FLJ21820	357	http://www.ncbi.nlm.nih.gov/sites/entrez?Db=gene&Cmd=ShowDetailView&TermToSearch=151449&ordinalpos=1&itool=EntrezSystem2.PEntrez.Gene.Gene_ResultsPanel.Gene_RVDocSum	GDF7	GDF7	509	2.7	0.3	1.6	0.4	0.032	0.00043	0.031	-0.5	-0.4	-0.2	0	1	0.43	0.24
http://www.ensembl.org/Homo_sapiens/Variation/Summary?v=rs501863	rs501863	rs501863	2	0.95	0.05	0	0	2.9e-05	0.99	-0.15	0	G	A	0.17	http://www.ncbi.nlm.nih.gov/sites/entrez?Db=gene&Cmd=ShowDetailView&TermToSearch=338&ordinalpos=1&itool=EntrezSystem2.PEntrez.Gene.Gene_ResultsPanel.Gene_RVDocSum	APOB	APOB	123	http://www.ncbi.nlm.nih.gov/sites/entrez?Db=gene&Cmd=ShowDetailView&TermToSearch=60526&ordinalpos=1&itool=EntrezSystem2.PEntrez.Gene.Gene_ResultsPanel.Gene_RVDocSum	FLJ21820	FLJ21820	357	http://www.ncbi.nlm.nih.gov/sites/entrez?Db=gene&Cmd=ShowDetailView&TermToSearch=151449&ordinalpos=1&itool=EntrezSystem2.PEntrez.Gene.Gene_ResultsPanel.Gene_RVDocSum	GDF7	GDF7	509	2.8	0.3	1.7	0.4	0.032	0.00039	0.03	-0.5	-0.5	-0.2	-0.1	0.98	0.44	0.26
http://www.ensembl.org/Homo_sapiens/Variation/Summary?v=rs480732	rs480732	rs480732	2	0.95	0.05	0	0	3.1e-05	1	-0.14	0	A	T	0.17	http://www.ncbi.nlm.nih.gov/sites/entrez?Db=gene&Cmd=ShowDetailView&TermToSearch=338&ordinalpos=1&itool=EntrezSystem2.PEntrez.Gene.Gene_ResultsPanel.Gene_RVDocSum	APOB	APOB	123	http://www.ncbi.nlm.nih.gov/sites/entrez?Db=gene&Cmd=ShowDetailView&TermToSearch=60526&ordinalpos=1&itool=EntrezSystem2.PEntrez.Gene.Gene_ResultsPanel.Gene_RVDocSum	FLJ21820	FLJ21820	357	http://www.ncbi.nlm.nih.gov/sites/entrez?Db=gene&Cmd=ShowDetailView&TermToSearch=151449&ordinalpos=1&itool=EntrezSystem2.PEntrez.Gene.Gene_ResultsPanel.Gene_RVDocSum	GDF7	GDF7	509	2.7	0.3	1.6	0.4	0.032	0.00048	0.032	-0.5	-0.5	-0.2	-0.1	0.98	0.43	0.26
http://www.ensembl.org/Homo_sapiens/Variation/Summary?v=rs480787	rs480787	rs480787	2	0.94	0.06	0	0	2.5e-05	0.98	-0.14	0	A	G	0.19	http://www.ncbi.nlm.nih.gov/sites/entrez?Db=gene&Cmd=ShowDetailView&TermToSearch=338&ordinalpos=1&itool=EntrezSystem2.PEntrez.Gene.Gene_ResultsPanel.Gene_RVDocSum	APOB	APOB	123	http://www.ncbi.nlm.nih.gov/sites/entrez?Db=gene&Cmd=ShowDetailView&TermToSearch=60526&ordinalpos=1&itool=EntrezSystem2.PEntrez.Gene.Gene_ResultsPanel.Gene_RVDocSum	FLJ21820	FLJ21820	357	http://www.ncbi.nlm.nih.gov/sites/entrez?Db=gene&Cmd=ShowDetailView&TermToSearch=151449&ordinalpos=1&itool=EntrezSystem2.PEntrez.Gene.Gene_ResultsPanel.Gene_RVDocSum	GDF7	GDF7	509	2.8	0.3	1.7	0.3	0.039	0.00041	0.04	-0.5	-0.5	-0.2	-0.1	0.99	0.39	0.23
http://www.ensembl.org/Homo_sapiens/Variation/Summary?v=rs483436	rs483436	rs483436	2	0.95	0.05	0	0	3.2e-05	0.97	-0.15	0	G	A	0.17	http://www.ncbi.nlm.nih.gov/sites/entrez?Db=gene&Cmd=ShowDetailView&TermToSearch=338&ordinalpos=1&itool=EntrezSystem2.PEntrez.Gene.Gene_ResultsPanel.Gene_RVDocSum	APOB	APOB	123	http://www.ncbi.nlm.nih.gov/sites/entrez?Db=gene&Cmd=ShowDetailView&TermToSearch=60526&ordinalpos=1&itool=EntrezSystem2.PEntrez.Gene.Gene_ResultsPanel.Gene_RVDocSum	FLJ21820	FLJ21820	358	http://www.ncbi.nlm.nih.gov/sites/entrez?Db=gene&Cmd=ShowDetailView&TermToSearch=151449&ordinalpos=1&itool=EntrezSystem2.PEntrez.Gene.Gene_ResultsPanel.Gene_RVDocSum	GDF7	GDF7	509	2.7	0.3	1.7	0.3	0.032	0.00047	0.037	-0.5	-0.4	-0.2	-0.1	0.97	0.45	0.23
http://www.ensembl.org/Homo_sapiens/Variation/Summary?v=rs486139	rs486139	rs486139	2	0.94	0.06	0	0	2.3e-05	0.98	-0.14	0	G	A	0.2	http://www.ncbi.nlm.nih.gov/sites/entrez?Db=gene&Cmd=ShowDetailView&TermToSearch=338&ordinalpos=1&itool=EntrezSystem2.PEntrez.Gene.Gene_ResultsPanel.Gene_RVDocSum	APOB	APOB	124	http://www.ncbi.nlm.nih.gov/sites/entrez?Db=gene&Cmd=ShowDetailView&TermToSearch=60526&ordinalpos=1&itool=EntrezSystem2.PEntrez.Gene.Gene_ResultsPanel.Gene_RVDocSum	FLJ21820	FLJ21820	358	http://www.ncbi.nlm.nih.gov/sites/entrez?Db=gene&Cmd=ShowDetailView&TermToSearch=151449&ordinalpos=1&itool=EntrezSystem2.PEntrez.Gene.Gene_ResultsPanel.Gene_RVDocSum	GDF7	GDF7	509	2.9	0.3	1.7	0.3	0.039	0.00042	0.04	-0.5	-0.5	-0.2	-0.1	0.99	0.4	0.21
http://www.ensembl.org/Homo_sapiens/Variation/Summary?v=rs538528	rs538528	rs538528	2	0.93	0.06	0	0	2.2e-05	0.98	-0.14	0	T	C	0.2	http://www.ncbi.nlm.nih.gov/sites/entrez?Db=gene&Cmd=ShowDetailView&TermToSearch=338&ordinalpos=1&itool=EntrezSystem2.PEntrez.Gene.Gene_ResultsPanel.Gene_RVDocSum	APOB	APOB	125	http://www.ncbi.nlm.nih.gov/sites/entrez?Db=gene&Cmd=ShowDetailView&TermToSearch=60526&ordinalpos=1&itool=EntrezSystem2.PEntrez.Gene.Gene_ResultsPanel.Gene_RVDocSum	FLJ21820	FLJ21820	359	http://www.ncbi.nlm.nih.gov/sites/entrez?Db=gene&Cmd=ShowDetailView&TermToSearch=151449&ordinalpos=1&itool=EntrezSystem2.PEntrez.Gene.Gene_ResultsPanel.Gene_RVDocSum	GDF7	GDF7	511	2.9	0.3	1.7	0.3	0.037	0.00047	0.042	-0.5	-0.5	-0.2	-0.1	0.99	0.39	0.21
http://www.ensembl.org/Homo_sapiens/Variation/Summary?v=rs540439	rs540439	rs540439	2	0.94	0.06	0	0	2.2e-05	0.97	-0.13	0	C	T	0.2	http://www.ncbi.nlm.nih.gov/sites/entrez?Db=gene&Cmd=ShowDetailView&TermToSearch=338&ordinalpos=1&itool=EntrezSystem2.PEntrez.Gene.Gene_ResultsPanel.Gene_RVDocSum	APOB	APOB	125	http://www.ncbi.nlm.nih.gov/sites/entrez?Db=gene&Cmd=ShowDetailView&TermToSearch=60526&ordinalpos=1&itool=EntrezSystem2.PEntrez.Gene.Gene_ResultsPanel.Gene_RVDocSum	FLJ21820	FLJ21820	359	http://www.ncbi.nlm.nih.gov/sites/entrez?Db=gene&Cmd=ShowDetailView&TermToSearch=151449&ordinalpos=1&itool=EntrezSystem2.PEntrez.Gene.Gene_ResultsPanel.Gene_RVDocSum	GDF7	GDF7	511	2.9	0.3	1.7	0.3	0.037	0.00049	0.042	-0.5	-0.5	-0.2	-0.1	0.98	0.39	0.21
http://www.ensembl.org/Homo_sapiens/Variation/Summary?v=rs563280	rs563280	rs563280	2	0.93	0.06	0	0	2.2e-05	0.98	-0.13	0	T	G	0.2	http://www.ncbi.nlm.nih.gov/sites/entrez?Db=gene&Cmd=ShowDetailView&TermToSearch=338&ordinalpos=1&itool=EntrezSystem2.PEntrez.Gene.Gene_ResultsPanel.Gene_RVDocSum	APOB	APOB	125	http://www.ncbi.nlm.nih.gov/sites/entrez?Db=gene&Cmd=ShowDetailView&TermToSearch=60526&ordinalpos=1&itool=EntrezSystem2.PEntrez.Gene.Gene_ResultsPanel.Gene_RVDocSum	FLJ21820	FLJ21820	359	http://www.ncbi.nlm.nih.gov/sites/entrez?Db=gene&Cmd=ShowDetailView&TermToSearch=151449&ordinalpos=1&itool=EntrezSystem2.PEntrez.Gene.Gene_ResultsPanel.Gene_RVDocSum	GDF7	GDF7	511	2.9	0.3	1.7	0.3	0.037	0.0005	0.042	-0.5	-0.5	-0.3	-0.1	0.98	0.39	0.21
http://www.ensembl.org/Homo_sapiens/Variation/Summary?v=rs576203	rs576203	rs576203	2	0.93	0.06	0	0	2.2e-05	0.99	-0.14	0	A	G	0.2	http://www.ncbi.nlm.nih.gov/sites/entrez?Db=gene&Cmd=ShowDetailView&TermToSearch=338&ordinalpos=1&itool=EntrezSystem2.PEntrez.Gene.Gene_ResultsPanel.Gene_RVDocSum	APOB	APOB	127	http://www.ncbi.nlm.nih.gov/sites/entrez?Db=gene&Cmd=ShowDetailView&TermToSearch=60526&ordinalpos=1&itool=EntrezSystem2.PEntrez.Gene.Gene_ResultsPanel.Gene_RVDocSum	FLJ21820	FLJ21820	361	http://www.ncbi.nlm.nih.gov/sites/entrez?Db=gene&Cmd=ShowDetailView&TermToSearch=151449&ordinalpos=1&itool=EntrezSystem2.PEntrez.Gene.Gene_ResultsPanel.Gene_RVDocSum	GDF7	GDF7	512	2.9	0.3	1.7	0.3	0.037	0.00047	0.042	-0.5	-0.5	-0.3	-0.1	0.98	0.4	0.21
http://www.ensembl.org/Homo_sapiens/Variation/Summary?v=rs488507	rs488507	rs488507	2	0.93	0.07	0	0	2e-05	0.98	-0.14	0	G	T	0.2	http://www.ncbi.nlm.nih.gov/sites/entrez?Db=gene&Cmd=ShowDetailView&TermToSearch=338&ordinalpos=1&itool=EntrezSystem2.PEntrez.Gene.Gene_ResultsPanel.Gene_RVDocSum	APOB	APOB	127	http://www.ncbi.nlm.nih.gov/sites/entrez?Db=gene&Cmd=ShowDetailView&TermToSearch=60526&ordinalpos=1&itool=EntrezSystem2.PEntrez.Gene.Gene_ResultsPanel.Gene_RVDocSum	FLJ21820	FLJ21820	361	http://www.ncbi.nlm.nih.gov/sites/entrez?Db=gene&Cmd=ShowDetailView&TermToSearch=151449&ordinalpos=1&itool=EntrezSystem2.PEntrez.Gene.Gene_ResultsPanel.Gene_RVDocSum	GDF7	GDF7	512	2.9	0.3	1.7	0.3	0.036	0.00044	0.042	-0.5	-0.5	-0.3	-0.1	0.94	0.43	0.2
http://www.ensembl.org/Homo_sapiens/Variation/Summary?v=rs578095	rs578095	rs578095	2	0.92	0.08	0	0	1.6e-05	0.98	-0.14	0	A	G	0.2	http://www.ncbi.nlm.nih.gov/sites/entrez?Db=gene&Cmd=ShowDetailView&TermToSearch=338&ordinalpos=1&itool=EntrezSystem2.PEntrez.Gene.Gene_ResultsPanel.Gene_RVDocSum	APOB	APOB	127	http://www.ncbi.nlm.nih.gov/sites/entrez?Db=gene&Cmd=ShowDetailView&TermToSearch=60526&ordinalpos=1&itool=EntrezSystem2.PEntrez.Gene.Gene_ResultsPanel.Gene_RVDocSum	FLJ21820	FLJ21820	361	http://www.ncbi.nlm.nih.gov/sites/entrez?Db=gene&Cmd=ShowDetailView&TermToSearch=151449&ordinalpos=1&itool=EntrezSystem2.PEntrez.Gene.Gene_ResultsPanel.Gene_RVDocSum	GDF7	GDF7	513	3	0.3	1.8	0.3	0.036	0.0004	0.039	-0.5	-0.5	-0.3	0	0.94	0.47	0.19
http://www.ensembl.org/Homo_sapiens/Variation/Summary?v=rs496100	rs496100	rs496100	2	0.91	0.09	0	0	1.4e-05	0.95	-0.14	0	A	G	0.2	http://www.ncbi.nlm.nih.gov/sites/entrez?Db=gene&Cmd=ShowDetailView&TermToSearch=338&ordinalpos=1&itool=EntrezSystem2.PEntrez.Gene.Gene_ResultsPanel.Gene_RVDocSum	APOB	APOB	128	http://www.ncbi.nlm.nih.gov/sites/entrez?Db=gene&Cmd=ShowDetailView&TermToSearch=60526&ordinalpos=1&itool=EntrezSystem2.PEntrez.Gene.Gene_ResultsPanel.Gene_RVDocSum	FLJ21820	FLJ21820	362	http://www.ncbi.nlm.nih.gov/sites/entrez?Db=gene&Cmd=ShowDetailView&TermToSearch=151449&ordinalpos=1&itool=EntrezSystem2.PEntrez.Gene.Gene_ResultsPanel.Gene_RVDocSum	GDF7	GDF7	513	3.1	0.3	1.8	0.3	0.034	0.00036	0.041	-0.5	-0.5	-0.3	0	0.96	0.49	0.19
http://www.ensembl.org/Homo_sapiens/Variation/Summary?v=rs553523	rs553523	rs553523	2	0.9	0.1	0	0	1.3e-05	0.88	-0.13	0	T	G	0.21	http://www.ncbi.nlm.nih.gov/sites/entrez?Db=gene&Cmd=ShowDetailView&TermToSearch=338&ordinalpos=1&itool=EntrezSystem2.PEntrez.Gene.Gene_ResultsPanel.Gene_RVDocSum	APOB	APOB	128	http://www.ncbi.nlm.nih.gov/sites/entrez?Db=gene&Cmd=ShowDetailView&TermToSearch=60526&ordinalpos=1&itool=EntrezSystem2.PEntrez.Gene.Gene_ResultsPanel.Gene_RVDocSum	FLJ21820	FLJ21820	362	http://www.ncbi.nlm.nih.gov/sites/entrez?Db=gene&Cmd=ShowDetailView&TermToSearch=151449&ordinalpos=1&itool=EntrezSystem2.PEntrez.Gene.Gene_ResultsPanel.Gene_RVDocSum	GDF7	GDF7	514	3.1	0.3	1.8	0.3	0.035	0.00037	0.046	-0.5	-0.5	-0.3	0	0.95	0.55	0.17
http://www.ensembl.org/Homo_sapiens/Variation/Summary?v=rs554414	rs554414	rs554414	2	0.89	0.11	0	0	1.1e-05	0.85	-0.13	0.01	T	C	0.21	http://www.ncbi.nlm.nih.gov/sites/entrez?Db=gene&Cmd=ShowDetailView&TermToSearch=338&ordinalpos=1&itool=EntrezSystem2.PEntrez.Gene.Gene_ResultsPanel.Gene_RVDocSum	APOB	APOB	128	http://www.ncbi.nlm.nih.gov/sites/entrez?Db=gene&Cmd=ShowDetailView&TermToSearch=60526&ordinalpos=1&itool=EntrezSystem2.PEntrez.Gene.Gene_ResultsPanel.Gene_RVDocSum	FLJ21820	FLJ21820	362	http://www.ncbi.nlm.nih.gov/sites/entrez?Db=gene&Cmd=ShowDetailView&TermToSearch=151449&ordinalpos=1&itool=EntrezSystem2.PEntrez.Gene.Gene_ResultsPanel.Gene_RVDocSum	GDF7	GDF7	514	3.1	0.3	1.9	0.3	0.035	0.00035	0.045	-0.5	-0.5	-0.3	0	0.95	0.6	0.17
http://www.ensembl.org/Homo_sapiens/Variation/Summary?v=rs556504	rs556504	rs556504	2	0.88	0.11	0	0	1.1e-05	0.84	-0.13	0.01	C	G	0.21	http://www.ncbi.nlm.nih.gov/sites/entrez?Db=gene&Cmd=ShowDetailView&TermToSearch=338&ordinalpos=1&itool=EntrezSystem2.PEntrez.Gene.Gene_ResultsPanel.Gene_RVDocSum	APOB	APOB	128	http://www.ncbi.nlm.nih.gov/sites/entrez?Db=gene&Cmd=ShowDetailView&TermToSearch=60526&ordinalpos=1&itool=EntrezSystem2.PEntrez.Gene.Gene_ResultsPanel.Gene_RVDocSum	FLJ21820	FLJ21820	362	http://www.ncbi.nlm.nih.gov/sites/entrez?Db=gene&Cmd=ShowDetailView&TermToSearch=151449&ordinalpos=1&itool=EntrezSystem2.PEntrez.Gene.Gene_ResultsPanel.Gene_RVDocSum	GDF7	GDF7	514	3.2	0.3	1.9	0.3	0.034	0.00034	0.045	-0.5	-0.5	-0.3	0	0.95	0.6	0.16
http://www.ensembl.org/Homo_sapiens/Variation/Summary?v=rs559967	rs559967	rs559967	2	0.89	0.11	0	0	1.2e-05	0.86	-0.13	0.01	A	G	0.21	http://www.ncbi.nlm.nih.gov/sites/entrez?Db=gene&Cmd=ShowDetailView&TermToSearch=338&ordinalpos=1&itool=EntrezSystem2.PEntrez.Gene.Gene_ResultsPanel.Gene_RVDocSum	APOB	APOB	129	http://www.ncbi.nlm.nih.gov/sites/entrez?Db=gene&Cmd=ShowDetailView&TermToSearch=60526&ordinalpos=1&itool=EntrezSystem2.PEntrez.Gene.Gene_ResultsPanel.Gene_RVDocSum	FLJ21820	FLJ21820	363	http://www.ncbi.nlm.nih.gov/sites/entrez?Db=gene&Cmd=ShowDetailView&TermToSearch=151449&ordinalpos=1&itool=EntrezSystem2.PEntrez.Gene.Gene_ResultsPanel.Gene_RVDocSum	GDF7	GDF7	514	3.1	0.3	1.9	0.3	0.035	0.00031	0.055	-0.5	-0.4	-0.3	0	0.93	0.58	0.16
http://www.ensembl.org/Homo_sapiens/Variation/Summary?v=rs561850	rs561850	rs561850	2	0.89	0.11	0	0	1.2e-05	0.86	-0.13	0.01	A	G	0.21	http://www.ncbi.nlm.nih.gov/sites/entrez?Db=gene&Cmd=ShowDetailView&TermToSearch=338&ordinalpos=1&itool=EntrezSystem2.PEntrez.Gene.Gene_ResultsPanel.Gene_RVDocSum	APOB	APOB	129	http://www.ncbi.nlm.nih.gov/sites/entrez?Db=gene&Cmd=ShowDetailView&TermToSearch=60526&ordinalpos=1&itool=EntrezSystem2.PEntrez.Gene.Gene_ResultsPanel.Gene_RVDocSum	FLJ21820	FLJ21820	363	http://www.ncbi.nlm.nih.gov/sites/entrez?Db=gene&Cmd=ShowDetailView&TermToSearch=645949&ordinalpos=1&itool=EntrezSystem2.PEntrez.Gene.Gene_ResultsPanel.Gene_RVDocSum	LOC645949	LOC645949	515	3.1	0.3	1.9	0.3	0.035	0.00031	0.055	-0.5	-0.4	-0.3	0	0.93	0.58	0.16
http://www.ensembl.org/Homo_sapiens/Variation/Summary?v=rs473269	rs473269	rs473269	2	0.88	0.11	0	0	1.1e-05	0.85	-0.14	0.01	T	C	0.21	http://www.ncbi.nlm.nih.gov/sites/entrez?Db=gene&Cmd=ShowDetailView&TermToSearch=338&ordinalpos=1&itool=EntrezSystem2.PEntrez.Gene.Gene_ResultsPanel.Gene_RVDocSum	APOB	APOB	129	http://www.ncbi.nlm.nih.gov/sites/entrez?Db=gene&Cmd=ShowDetailView&TermToSearch=60526&ordinalpos=1&itool=EntrezSystem2.PEntrez.Gene.Gene_ResultsPanel.Gene_RVDocSum	FLJ21820	FLJ21820	363	http://www.ncbi.nlm.nih.gov/sites/entrez?Db=gene&Cmd=ShowDetailView&TermToSearch=645949&ordinalpos=1&itool=EntrezSystem2.PEntrez.Gene.Gene_ResultsPanel.Gene_RVDocSum	LOC645949	LOC645949	514	3.1	0.3	1.9	0.3	0.034	0.00031	0.056	-0.5	-0.4	-0.3	0	0.94	0.58	0.16
http://www.ensembl.org/Homo_sapiens/Variation/Summary?v=rs477146	rs477146	rs477146	2	0.88	0.12	0	0	1e-05	0.86	-0.14	0.01	A	G	0.21	http://www.ncbi.nlm.nih.gov/sites/entrez?Db=gene&Cmd=ShowDetailView&TermToSearch=338&ordinalpos=1&itool=EntrezSystem2.PEntrez.Gene.Gene_ResultsPanel.Gene_RVDocSum	APOB	APOB	129	http://www.ncbi.nlm.nih.gov/sites/entrez?Db=gene&Cmd=ShowDetailView&TermToSearch=60526&ordinalpos=1&itool=EntrezSystem2.PEntrez.Gene.Gene_ResultsPanel.Gene_RVDocSum	FLJ21820	FLJ21820	364	http://www.ncbi.nlm.nih.gov/sites/entrez?Db=gene&Cmd=ShowDetailView&TermToSearch=645949&ordinalpos=1&itool=EntrezSystem2.PEntrez.Gene.Gene_ResultsPanel.Gene_RVDocSum	LOC645949	LOC645949	514	3.2	0.3	1.9	0.3	0.034	0.00026	0.06	-0.5	-0.4	-0.3	0	0.93	0.56	0.15
http://www.ensembl.org/Homo_sapiens/Variation/Summary?v=rs1652417	rs1652417	rs1652417	2	0.88	0.12	0	0	1e-05	0.84	-0.13	0.01	T	C	0.21	http://www.ncbi.nlm.nih.gov/sites/entrez?Db=gene&Cmd=ShowDetailView&TermToSearch=338&ordinalpos=1&itool=EntrezSystem2.PEntrez.Gene.Gene_ResultsPanel.Gene_RVDocSum	APOB	APOB	130	http://www.ncbi.nlm.nih.gov/sites/entrez?Db=gene&Cmd=ShowDetailView&TermToSearch=60526&ordinalpos=1&itool=EntrezSystem2.PEntrez.Gene.Gene_ResultsPanel.Gene_RVDocSum	FLJ21820	FLJ21820	364	http://www.ncbi.nlm.nih.gov/sites/entrez?Db=gene&Cmd=ShowDetailView&TermToSearch=645949&ordinalpos=1&itool=EntrezSystem2.PEntrez.Gene.Gene_ResultsPanel.Gene_RVDocSum	LOC645949	LOC645949	514	3.2	0.3	1.9	0.2	0.034	0.00028	0.061	-0.5	-0.4	-0.3	0	0.93	0.59	0.15
http://www.ensembl.org/Homo_sapiens/Variation/Summary?v=rs1712251	rs1712251	rs1712251	2	0.88	0.12	0	0	1e-05	0.8	-0.13	0.01	G	A	0.21	http://www.ncbi.nlm.nih.gov/sites/entrez?Db=gene&Cmd=ShowDetailView&TermToSearch=338&ordinalpos=1&itool=EntrezSystem2.PEntrez.Gene.Gene_ResultsPanel.Gene_RVDocSum	APOB	APOB	130	http://www.ncbi.nlm.nih.gov/sites/entrez?Db=gene&Cmd=ShowDetailView&TermToSearch=60526&ordinalpos=1&itool=EntrezSystem2.PEntrez.Gene.Gene_ResultsPanel.Gene_RVDocSum	FLJ21820	FLJ21820	364	http://www.ncbi.nlm.nih.gov/sites/entrez?Db=gene&Cmd=ShowDetailView&TermToSearch=645949&ordinalpos=1&itool=EntrezSystem2.PEntrez.Gene.Gene_ResultsPanel.Gene_RVDocSum	LOC645949	LOC645949	514	3.2	0.3	1.9	0.3	0.034	0.00029	0.059	-0.5	-0.4	-0.4	0	0.94	0.63	0.15
http://www.ensembl.org/Homo_sapiens/Variation/Summary?v=rs1652416	rs1652416	rs1652416	2	0.88	0.11	0	0	1.1e-05	0.79	-0.13	0.01	A	G	0.21	http://www.ncbi.nlm.nih.gov/sites/entrez?Db=gene&Cmd=ShowDetailView&TermToSearch=338&ordinalpos=1&itool=EntrezSystem2.PEntrez.Gene.Gene_ResultsPanel.Gene_RVDocSum	APOB	APOB	130	http://www.ncbi.nlm.nih.gov/sites/entrez?Db=gene&Cmd=ShowDetailView&TermToSearch=60526&ordinalpos=1&itool=EntrezSystem2.PEntrez.Gene.Gene_ResultsPanel.Gene_RVDocSum	FLJ21820	FLJ21820	364	http://www.ncbi.nlm.nih.gov/sites/entrez?Db=gene&Cmd=ShowDetailView&TermToSearch=645949&ordinalpos=1&itool=EntrezSystem2.PEntrez.Gene.Gene_ResultsPanel.Gene_RVDocSum	LOC645949	LOC645949	514	3.2	0.3	1.9	0.2	0.036	0.00029	0.061	-0.5	-0.4	-0.4	0	0.94	0.64	0.14
rs-link	rsnum	SNP	chr	HO	HS	HD	HS+D	P-value-S	P-value-D	Effect-S	Effect-D	Minor Allele	Major Allele	MAF	GENE1-link	GENE1	GENE1	dist1 (Kb)	GENE2-link	GENE2	GENE2	dist2 (Kb)	GENE3-link	GENE3	GENE3	dist3 (Kb)	log10BF-S	log10BF-S-TNT	log10BF-S-PRINCE	log10BF-S-CAP	P-value-S-TNT	P-value-S-PRINCE	P-value-S-CAP	log10BF-D	log10BF-D-TNT	log10BF-D-PRINCE	log10BF-D-CAP	P-value-D-TNT	P-value-D-PRINCE	P-value-D-CAP
http://www.ensembl.org/Homo_sapiens/Variation/Summary?v=rs483621	rs483621	rs483621	2	0.88	0.11	0	0	1.1e-05	0.78	-0.13	0.01	T	A	0.2	http://www.ncbi.nlm.nih.gov/sites/entrez?Db=gene&Cmd=ShowDetailView&TermToSearch=338&ordinalpos=1&itool=EntrezSystem2.PEntrez.Gene.Gene_ResultsPanel.Gene_RVDocSum	APOB	APOB	130	http://www.ncbi.nlm.nih.gov/sites/entrez?Db=gene&Cmd=ShowDetailView&TermToSearch=60526&ordinalpos=1&itool=EntrezSystem2.PEntrez.Gene.Gene_ResultsPanel.Gene_RVDocSum	FLJ21820	FLJ21820	364	http://www.ncbi.nlm.nih.gov/sites/entrez?Db=gene&Cmd=ShowDetailView&TermToSearch=645949&ordinalpos=1&itool=EntrezSystem2.PEntrez.Gene.Gene_ResultsPanel.Gene_RVDocSum	LOC645949	LOC645949	513	3.2	0.3	1.9	0.2	0.036	0.00029	0.062	-0.5	-0.4	-0.4	0	0.95	0.65	0.14
http://www.ensembl.org/Homo_sapiens/Variation/Summary?v=rs506585	rs506585	rs506585	2	0.9	0.1	0	0	1.3e-05	0.83	-0.13	0.01	G	A	0.2	http://www.ncbi.nlm.nih.gov/sites/entrez?Db=gene&Cmd=ShowDetailView&TermToSearch=338&ordinalpos=1&itool=EntrezSystem2.PEntrez.Gene.Gene_ResultsPanel.Gene_RVDocSum	APOB	APOB	130	http://www.ncbi.nlm.nih.gov/sites/entrez?Db=gene&Cmd=ShowDetailView&TermToSearch=60526&ordinalpos=1&itool=EntrezSystem2.PEntrez.Gene.Gene_ResultsPanel.Gene_RVDocSum	FLJ21820	FLJ21820	364	http://www.ncbi.nlm.nih.gov/sites/entrez?Db=gene&Cmd=ShowDetailView&TermToSearch=645949&ordinalpos=1&itool=EntrezSystem2.PEntrez.Gene.Gene_ResultsPanel.Gene_RVDocSum	LOC645949	LOC645949	513	3.1	0.3	1.9	0.2	0.036	0.00031	0.073	-0.5	-0.4	-0.3	0	0.95	0.58	0.15
http://www.ensembl.org/Homo_sapiens/Variation/Summary?v=rs507616	rs507616	rs507616	2	0.9	0.1	0	0	1.2e-05	0.82	-0.13	0.01	G	C	0.19	http://www.ncbi.nlm.nih.gov/sites/entrez?Db=gene&Cmd=ShowDetailView&TermToSearch=338&ordinalpos=1&itool=EntrezSystem2.PEntrez.Gene.Gene_ResultsPanel.Gene_RVDocSum	APOB	APOB	130	http://www.ncbi.nlm.nih.gov/sites/entrez?Db=gene&Cmd=ShowDetailView&TermToSearch=60526&ordinalpos=1&itool=EntrezSystem2.PEntrez.Gene.Gene_ResultsPanel.Gene_RVDocSum	FLJ21820	FLJ21820	365	http://www.ncbi.nlm.nih.gov/sites/entrez?Db=gene&Cmd=ShowDetailView&TermToSearch=645949&ordinalpos=1&itool=EntrezSystem2.PEntrez.Gene.Gene_ResultsPanel.Gene_RVDocSum	LOC645949	LOC645949	513	3.1	0.3	1.9	0.2	0.036	0.00028	0.072	-0.5	-0.4	-0.3	0	0.96	0.59	0.15
http://www.ensembl.org/Homo_sapiens/Variation/Summary?v=rs531380	rs531380	rs531380	2	0.9	0.1	0	0	1.2e-05	0.83	-0.13	0.01	C	G	0.19	http://www.ncbi.nlm.nih.gov/sites/entrez?Db=gene&Cmd=ShowDetailView&TermToSearch=338&ordinalpos=1&itool=EntrezSystem2.PEntrez.Gene.Gene_ResultsPanel.Gene_RVDocSum	APOB	APOB	131	http://www.ncbi.nlm.nih.gov/sites/entrez?Db=gene&Cmd=ShowDetailView&TermToSearch=60526&ordinalpos=1&itool=EntrezSystem2.PEntrez.Gene.Gene_ResultsPanel.Gene_RVDocSum	FLJ21820	FLJ21820	365	http://www.ncbi.nlm.nih.gov/sites/entrez?Db=gene&Cmd=ShowDetailView&TermToSearch=645949&ordinalpos=1&itool=EntrezSystem2.PEntrez.Gene.Gene_ResultsPanel.Gene_RVDocSum	LOC645949	LOC645949	513	3.1	0.3	1.9	0.2	0.036	0.00026	0.073	-0.5	-0.4	-0.3	0	0.96	0.6	0.16
http://www.ensembl.org/Homo_sapiens/Variation/Summary?v=rs532225	rs532225	rs532225	2	0.9	0.1	0	0	1.3e-05	0.83	-0.13	0.01	T	C	0.19	http://www.ncbi.nlm.nih.gov/sites/entrez?Db=gene&Cmd=ShowDetailView&TermToSearch=338&ordinalpos=1&itool=EntrezSystem2.PEntrez.Gene.Gene_ResultsPanel.Gene_RVDocSum	APOB	APOB	131	http://www.ncbi.nlm.nih.gov/sites/entrez?Db=gene&Cmd=ShowDetailView&TermToSearch=60526&ordinalpos=1&itool=EntrezSystem2.PEntrez.Gene.Gene_ResultsPanel.Gene_RVDocSum	FLJ21820	FLJ21820	365	http://www.ncbi.nlm.nih.gov/sites/entrez?Db=gene&Cmd=ShowDetailView&TermToSearch=645949&ordinalpos=1&itool=EntrezSystem2.PEntrez.Gene.Gene_ResultsPanel.Gene_RVDocSum	LOC645949	LOC645949	513	3.1	0.3	1.9	0.2	0.036	0.00026	0.073	-0.5	-0.4	-0.3	0	0.96	0.6	0.16
http://www.ensembl.org/Homo_sapiens/Variation/Summary?v=rs560408	rs560408	rs560408	2	0.9	0.1	0	0	1.3e-05	0.83	-0.13	0.01	T	C	0.19	http://www.ncbi.nlm.nih.gov/sites/entrez?Db=gene&Cmd=ShowDetailView&TermToSearch=338&ordinalpos=1&itool=EntrezSystem2.PEntrez.Gene.Gene_ResultsPanel.Gene_RVDocSum	APOB	APOB	131	http://www.ncbi.nlm.nih.gov/sites/entrez?Db=gene&Cmd=ShowDetailView&TermToSearch=60526&ordinalpos=1&itool=EntrezSystem2.PEntrez.Gene.Gene_ResultsPanel.Gene_RVDocSum	FLJ21820	FLJ21820	366	http://www.ncbi.nlm.nih.gov/sites/entrez?Db=gene&Cmd=ShowDetailView&TermToSearch=645949&ordinalpos=1&itool=EntrezSystem2.PEntrez.Gene.Gene_ResultsPanel.Gene_RVDocSum	LOC645949	LOC645949	512	3.1	0.3	1.9	0.2	0.036	0.00025	0.073	-0.5	-0.4	-0.3	0	0.96	0.61	0.16
http://www.ensembl.org/Homo_sapiens/Variation/Summary?v=rs541569	rs541569	rs541569	2	0.9	0.1	0	0	1.3e-05	0.84	-0.13	0.01	G	A	0.19	http://www.ncbi.nlm.nih.gov/sites/entrez?Db=gene&Cmd=ShowDetailView&TermToSearch=338&ordinalpos=1&itool=EntrezSystem2.PEntrez.Gene.Gene_ResultsPanel.Gene_RVDocSum	APOB	APOB	132	http://www.ncbi.nlm.nih.gov/sites/entrez?Db=gene&Cmd=ShowDetailView&TermToSearch=60526&ordinalpos=1&itool=EntrezSystem2.PEntrez.Gene.Gene_ResultsPanel.Gene_RVDocSum	FLJ21820	FLJ21820	366	http://www.ncbi.nlm.nih.gov/sites/entrez?Db=gene&Cmd=ShowDetailView&TermToSearch=645949&ordinalpos=1&itool=EntrezSystem2.PEntrez.Gene.Gene_ResultsPanel.Gene_RVDocSum	LOC645949	LOC645949	512	3.1	0.3	2	0.2	0.036	0.00024	0.07	-0.5	-0.4	-0.3	0	0.96	0.61	0.17
http://www.ensembl.org/Homo_sapiens/Variation/Summary?v=rs544039	rs544039	rs544039	2	0.9	0.1	0	0	1.3e-05	0.86	-0.14	0.01	C	A	0.19	http://www.ncbi.nlm.nih.gov/sites/entrez?Db=gene&Cmd=ShowDetailView&TermToSearch=338&ordinalpos=1&itool=EntrezSystem2.PEntrez.Gene.Gene_ResultsPanel.Gene_RVDocSum	APOB	APOB	132	http://www.ncbi.nlm.nih.gov/sites/entrez?Db=gene&Cmd=ShowDetailView&TermToSearch=60526&ordinalpos=1&itool=EntrezSystem2.PEntrez.Gene.Gene_ResultsPanel.Gene_RVDocSum	FLJ21820	FLJ21820	366	http://www.ncbi.nlm.nih.gov/sites/entrez?Db=gene&Cmd=ShowDetailView&TermToSearch=645949&ordinalpos=1&itool=EntrezSystem2.PEntrez.Gene.Gene_ResultsPanel.Gene_RVDocSum	LOC645949	LOC645949	511	3.1	0.3	2	0.2	0.035	0.00024	0.07	-0.5	-0.4	-0.3	0	0.94	0.61	0.17
http://www.ensembl.org/Homo_sapiens/Variation/Summary?v=rs478442	rs478442	rs478442	2	0.91	0.09	0	0	1.4e-05	0.86	-0.13	0.01	G	T	0.19	http://www.ncbi.nlm.nih.gov/sites/entrez?Db=gene&Cmd=ShowDetailView&TermToSearch=338&ordinalpos=1&itool=EntrezSystem2.PEntrez.Gene.Gene_ResultsPanel.Gene_RVDocSum	APOB	APOB	132	http://www.ncbi.nlm.nih.gov/sites/entrez?Db=gene&Cmd=ShowDetailView&TermToSearch=60526&ordinalpos=1&itool=EntrezSystem2.PEntrez.Gene.Gene_ResultsPanel.Gene_RVDocSum	FLJ21820	FLJ21820	366	http://www.ncbi.nlm.nih.gov/sites/entrez?Db=gene&Cmd=ShowDetailView&TermToSearch=645949&ordinalpos=1&itool=EntrezSystem2.PEntrez.Gene.Gene_ResultsPanel.Gene_RVDocSum	LOC645949	LOC645949	511	3.1	0.3	1.9	0.2	0.035	0.00025	0.07	-0.5	-0.4	-0.3	0	0.94	0.61	0.17
http://www.ensembl.org/Homo_sapiens/Variation/Summary?v=rs570033	rs570033	rs570033	2	0.91	0.09	0	0	1.4e-05	0.86	-0.13	0.01	C	G	0.19	http://www.ncbi.nlm.nih.gov/sites/entrez?Db=gene&Cmd=ShowDetailView&TermToSearch=338&ordinalpos=1&itool=EntrezSystem2.PEntrez.Gene.Gene_ResultsPanel.Gene_RVDocSum	APOB	APOB	133	http://www.ncbi.nlm.nih.gov/sites/entrez?Db=gene&Cmd=ShowDetailView&TermToSearch=60526&ordinalpos=1&itool=EntrezSystem2.PEntrez.Gene.Gene_ResultsPanel.Gene_RVDocSum	FLJ21820	FLJ21820	367	http://www.ncbi.nlm.nih.gov/sites/entrez?Db=gene&Cmd=ShowDetailView&TermToSearch=645949&ordinalpos=1&itool=EntrezSystem2.PEntrez.Gene.Gene_ResultsPanel.Gene_RVDocSum	LOC645949	LOC645949	511	3	0.3	2	0.2	0.035	0.00025	0.071	-0.5	-0.4	-0.3	0	0.94	0.62	0.17
http://www.ensembl.org/Homo_sapiens/Variation/Summary?v=rs574438	rs574438	rs574438	2	0.91	0.09	0	0	1.4e-05	0.85	-0.13	0.01	T	C	0.19	http://www.ncbi.nlm.nih.gov/sites/entrez?Db=gene&Cmd=ShowDetailView&TermToSearch=338&ordinalpos=1&itool=EntrezSystem2.PEntrez.Gene.Gene_ResultsPanel.Gene_RVDocSum	APOB	APOB	133	http://www.ncbi.nlm.nih.gov/sites/entrez?Db=gene&Cmd=ShowDetailView&TermToSearch=60526&ordinalpos=1&itool=EntrezSystem2.PEntrez.Gene.Gene_ResultsPanel.Gene_RVDocSum	FLJ21820	FLJ21820	367	http://www.ncbi.nlm.nih.gov/sites/entrez?Db=gene&Cmd=ShowDetailView&TermToSearch=645949&ordinalpos=1&itool=EntrezSystem2.PEntrez.Gene.Gene_ResultsPanel.Gene_RVDocSum	LOC645949	LOC645949	510	3	0.3	2	0.2	0.035	0.00024	0.074	-0.5	-0.4	-0.3	0	0.94	0.63	0.17
http://www.ensembl.org/Homo_sapiens/Variation/Summary?v=rs5002500	rs5002500	rs5002500	2	0.92	0.08	0	0	1.7e-05	0.84	-0.13	0.01	C	G	0.19	http://www.ncbi.nlm.nih.gov/sites/entrez?Db=gene&Cmd=ShowDetailView&TermToSearch=338&ordinalpos=1&itool=EntrezSystem2.PEntrez.Gene.Gene_ResultsPanel.Gene_RVDocSum	APOB	APOB	133	http://www.ncbi.nlm.nih.gov/sites/entrez?Db=gene&Cmd=ShowDetailView&TermToSearch=60526&ordinalpos=1&itool=EntrezSystem2.PEntrez.Gene.Gene_ResultsPanel.Gene_RVDocSum	FLJ21820	FLJ21820	367	http://www.ncbi.nlm.nih.gov/sites/entrez?Db=gene&Cmd=ShowDetailView&TermToSearch=645949&ordinalpos=1&itool=EntrezSystem2.PEntrez.Gene.Gene_ResultsPanel.Gene_RVDocSum	LOC645949	LOC645949	510	3	0.3	2	0.2	0.039	0.00024	0.076	-0.5	-0.4	-0.3	0	0.95	0.63	0.17
http://www.ensembl.org/Homo_sapiens/Variation/Summary?v=rs574461	rs574461	rs574461	2	0.91	0.09	0	0	1.4e-05	0.84	-0.14	0.01	A	G	0.19	http://www.ncbi.nlm.nih.gov/sites/entrez?Db=gene&Cmd=ShowDetailView&TermToSearch=338&ordinalpos=1&itool=EntrezSystem2.PEntrez.Gene.Gene_ResultsPanel.Gene_RVDocSum	APOB	APOB	133	http://www.ncbi.nlm.nih.gov/sites/entrez?Db=gene&Cmd=ShowDetailView&TermToSearch=60526&ordinalpos=1&itool=EntrezSystem2.PEntrez.Gene.Gene_ResultsPanel.Gene_RVDocSum	FLJ21820	FLJ21820	367	http://www.ncbi.nlm.nih.gov/sites/entrez?Db=gene&Cmd=ShowDetailView&TermToSearch=645949&ordinalpos=1&itool=EntrezSystem2.PEntrez.Gene.Gene_ResultsPanel.Gene_RVDocSum	LOC645949	LOC645949	510	3	0.3	2	0.2	0.035	0.00024	0.076	-0.5	-0.4	-0.3	0	0.95	0.63	0.17
http://www.ensembl.org/Homo_sapiens/Variation/Summary?v=rs494315	rs494315	rs494315	2	0.9	0.09	0	0	1.3e-05	0.84	-0.14	0.01	C	T	0.18	http://www.ncbi.nlm.nih.gov/sites/entrez?Db=gene&Cmd=ShowDetailView&TermToSearch=338&ordinalpos=1&itool=EntrezSystem2.PEntrez.Gene.Gene_ResultsPanel.Gene_RVDocSum	APOB	APOB	134	http://www.ncbi.nlm.nih.gov/sites/entrez?Db=gene&Cmd=ShowDetailView&TermToSearch=60526&ordinalpos=1&itool=EntrezSystem2.PEntrez.Gene.Gene_ResultsPanel.Gene_RVDocSum	FLJ21820	FLJ21820	368	http://www.ncbi.nlm.nih.gov/sites/entrez?Db=gene&Cmd=ShowDetailView&TermToSearch=645949&ordinalpos=1&itool=EntrezSystem2.PEntrez.Gene.Gene_ResultsPanel.Gene_RVDocSum	LOC645949	LOC645949	509	3.1	0.3	2	0.2	0.035	0.00024	0.076	-0.5	-0.4	-0.3	0	0.94	0.64	0.18
http://www.ensembl.org/Homo_sapiens/Variation/Summary?v=rs494465	rs494465	rs494465	2	0.9	0.1	0	0	1.2e-05	0.83	-0.14	0.01	C	T	0.18	http://www.ncbi.nlm.nih.gov/sites/entrez?Db=gene&Cmd=ShowDetailView&TermToSearch=338&ordinalpos=1&itool=EntrezSystem2.PEntrez.Gene.Gene_ResultsPanel.Gene_RVDocSum	APOB	APOB	134	http://www.ncbi.nlm.nih.gov/sites/entrez?Db=gene&Cmd=ShowDetailView&TermToSearch=60526&ordinalpos=1&itool=EntrezSystem2.PEntrez.Gene.Gene_ResultsPanel.Gene_RVDocSum	FLJ21820	FLJ21820	368	http://www.ncbi.nlm.nih.gov/sites/entrez?Db=gene&Cmd=ShowDetailView&TermToSearch=645949&ordinalpos=1&itool=EntrezSystem2.PEntrez.Gene.Gene_ResultsPanel.Gene_RVDocSum	LOC645949	LOC645949	509	3.1	0.3	2	0.2	0.034	0.00024	0.076	-0.5	-0.4	-0.3	0	0.95	0.64	0.18
http://www.ensembl.org/Homo_sapiens/Variation/Summary?v=rs478148	rs478148	rs478148	2	0.99	0.01	0	0	0.00023	0.84	-0.12	-0.01	T	C	0.27	http://www.ncbi.nlm.nih.gov/sites/entrez?Db=gene&Cmd=ShowDetailView&TermToSearch=338&ordinalpos=1&itool=EntrezSystem2.PEntrez.Gene.Gene_ResultsPanel.Gene_RVDocSum	APOB	APOB	136	http://www.ncbi.nlm.nih.gov/sites/entrez?Db=gene&Cmd=ShowDetailView&TermToSearch=60526&ordinalpos=1&itool=EntrezSystem2.PEntrez.Gene.Gene_ResultsPanel.Gene_RVDocSum	FLJ21820	FLJ21820	370	http://www.ncbi.nlm.nih.gov/sites/entrez?Db=gene&Cmd=ShowDetailView&TermToSearch=645949&ordinalpos=1&itool=EntrezSystem2.PEntrez.Gene.Gene_ResultsPanel.Gene_RVDocSum	LOC645949	LOC645949	507	2.1	0.1	1.3	0	0.076	0.0014	0.19	-0.5	-0.4	-0.3	-0.2	0.94	0.36	0.46
http://www.ensembl.org/Homo_sapiens/Variation/Summary?v=rs486246	rs486246	rs486246	2	0.88	0.12	0	0	9.7e-06	0.81	-0.15	0.01	G	A	0.19	http://www.ncbi.nlm.nih.gov/sites/entrez?Db=gene&Cmd=ShowDetailView&TermToSearch=338&ordinalpos=1&itool=EntrezSystem2.PEntrez.Gene.Gene_ResultsPanel.Gene_RVDocSum	APOB	APOB	140	http://www.ncbi.nlm.nih.gov/sites/entrez?Db=gene&Cmd=ShowDetailView&TermToSearch=60526&ordinalpos=1&itool=EntrezSystem2.PEntrez.Gene.Gene_ResultsPanel.Gene_RVDocSum	FLJ21820	FLJ21820	374	http://www.ncbi.nlm.nih.gov/sites/entrez?Db=gene&Cmd=ShowDetailView&TermToSearch=645949&ordinalpos=1&itool=EntrezSystem2.PEntrez.Gene.Gene_ResultsPanel.Gene_RVDocSum	LOC645949	LOC645949	504	3.2	0.3	2	0.2	0.035	0.00024	0.074	-0.5	-0.4	-0.3	0	0.98	0.63	0.18
http://www.ensembl.org/Homo_sapiens/Variation/Summary?v=rs312939	rs312939	rs312939	2	0.99	0.01	0	0	0.00024	0.81	-0.12	-0.01	G	A	0.26	http://www.ncbi.nlm.nih.gov/sites/entrez?Db=gene&Cmd=ShowDetailView&TermToSearch=338&ordinalpos=1&itool=EntrezSystem2.PEntrez.Gene.Gene_ResultsPanel.Gene_RVDocSum	APOB	APOB	143	http://www.ncbi.nlm.nih.gov/sites/entrez?Db=gene&Cmd=ShowDetailView&TermToSearch=60526&ordinalpos=1&itool=EntrezSystem2.PEntrez.Gene.Gene_ResultsPanel.Gene_RVDocSum	FLJ21820	FLJ21820	377	http://www.ncbi.nlm.nih.gov/sites/entrez?Db=gene&Cmd=ShowDetailView&TermToSearch=645949&ordinalpos=1&itool=EntrezSystem2.PEntrez.Gene.Gene_ResultsPanel.Gene_RVDocSum	LOC645949	LOC645949	501	2.1	0.1	1.3	0	0.078	0.0015	0.19	-0.5	-0.4	-0.3	-0.2	0.98	0.37	0.46
http://www.ensembl.org/Homo_sapiens/Variation/Summary?v=rs504616	rs504616	rs504616	2	0.88	0.12	0	0	9.9e-06	0.81	-0.15	0.01	C	G	0.19	http://www.ncbi.nlm.nih.gov/sites/entrez?Db=gene&Cmd=ShowDetailView&TermToSearch=338&ordinalpos=1&itool=EntrezSystem2.PEntrez.Gene.Gene_ResultsPanel.Gene_RVDocSum	APOB	APOB	147	http://www.ncbi.nlm.nih.gov/sites/entrez?Db=gene&Cmd=ShowDetailView&TermToSearch=60526&ordinalpos=1&itool=EntrezSystem2.PEntrez.Gene.Gene_ResultsPanel.Gene_RVDocSum	FLJ21820	FLJ21820	381	http://www.ncbi.nlm.nih.gov/sites/entrez?Db=gene&Cmd=ShowDetailView&TermToSearch=645949&ordinalpos=1&itool=EntrezSystem2.PEntrez.Gene.Gene_ResultsPanel.Gene_RVDocSum	LOC645949	LOC645949	496	3.2	0.3	2	0.2	0.035	0.00024	0.076	-0.5	-0.4	-0.3	0	0.97	0.65	0.18
http://www.ensembl.org/Homo_sapiens/Variation/Summary?v=rs535713	rs535713	rs535713	2	0.99	0.01	0	0	0.00023	0.79	-0.12	-0.01	G	C	0.27	http://www.ncbi.nlm.nih.gov/sites/entrez?Db=gene&Cmd=ShowDetailView&TermToSearch=338&ordinalpos=1&itool=EntrezSystem2.PEntrez.Gene.Gene_ResultsPanel.Gene_RVDocSum	APOB	APOB	147	http://www.ncbi.nlm.nih.gov/sites/entrez?Db=gene&Cmd=ShowDetailView&TermToSearch=60526&ordinalpos=1&itool=EntrezSystem2.PEntrez.Gene.Gene_ResultsPanel.Gene_RVDocSum	FLJ21820	FLJ21820	381	http://www.ncbi.nlm.nih.gov/sites/entrez?Db=gene&Cmd=ShowDetailView&TermToSearch=645949&ordinalpos=1&itool=EntrezSystem2.PEntrez.Gene.Gene_ResultsPanel.Gene_RVDocSum	LOC645949	LOC645949	496	2.1	0.1	1.3	0	0.073	0.0015	0.19	-0.5	-0.4	-0.3	-0.2	0.99	0.37	0.46
http://www.ensembl.org/Homo_sapiens/Variation/Summary?v=rs503662	rs503662	rs503662	2	0.99	0.01	0	0	0.00023	0.78	-0.12	-0.01	T	C	0.27	http://www.ncbi.nlm.nih.gov/sites/entrez?Db=gene&Cmd=ShowDetailView&TermToSearch=338&ordinalpos=1&itool=EntrezSystem2.PEntrez.Gene.Gene_ResultsPanel.Gene_RVDocSum	APOB	APOB	147	http://www.ncbi.nlm.nih.gov/sites/entrez?Db=gene&Cmd=ShowDetailView&TermToSearch=60526&ordinalpos=1&itool=EntrezSystem2.PEntrez.Gene.Gene_ResultsPanel.Gene_RVDocSum	FLJ21820	FLJ21820	381	http://www.ncbi.nlm.nih.gov/sites/entrez?Db=gene&Cmd=ShowDetailView&TermToSearch=645949&ordinalpos=1&itool=EntrezSystem2.PEntrez.Gene.Gene_ResultsPanel.Gene_RVDocSum	LOC645949	LOC645949	496	2.1	0.1	1.3	0	0.073	0.0015	0.19	-0.5	-0.4	-0.3	-0.2	0.98	0.37	0.47
http://www.ensembl.org/Homo_sapiens/Variation/Summary?v=rs10221876	rs10221876	rs10221876	2	0.9	0.1	0	0	1.2e-05	0.84	-0.15	0.01	T	A	0.19	http://www.ncbi.nlm.nih.gov/sites/entrez?Db=gene&Cmd=ShowDetailView&TermToSearch=338&ordinalpos=1&itool=EntrezSystem2.PEntrez.Gene.Gene_ResultsPanel.Gene_RVDocSum	APOB	APOB	153	http://www.ncbi.nlm.nih.gov/sites/entrez?Db=gene&Cmd=ShowDetailView&TermToSearch=60526&ordinalpos=1&itool=EntrezSystem2.PEntrez.Gene.Gene_ResultsPanel.Gene_RVDocSum	FLJ21820	FLJ21820	387	http://www.ncbi.nlm.nih.gov/sites/entrez?Db=gene&Cmd=ShowDetailView&TermToSearch=645949&ordinalpos=1&itool=EntrezSystem2.PEntrez.Gene.Gene_ResultsPanel.Gene_RVDocSum	LOC645949	LOC645949	490	3.1	0.3	1.9	0.2	0.037	0.00028	0.079	-0.5	-0.4	-0.3	-0.1	0.93	0.67	0.21
http://www.ensembl.org/Homo_sapiens/Variation/Summary?v=rs1878512	rs1878512	rs1878512	2	0.91	0.09	0	0	1.5e-05	0.89	-0.15	0	A	C	0.2	http://www.ncbi.nlm.nih.gov/sites/entrez?Db=gene&Cmd=ShowDetailView&TermToSearch=338&ordinalpos=1&itool=EntrezSystem2.PEntrez.Gene.Gene_ResultsPanel.Gene_RVDocSum	APOB	APOB	153	http://www.ncbi.nlm.nih.gov/sites/entrez?Db=gene&Cmd=ShowDetailView&TermToSearch=60526&ordinalpos=1&itool=EntrezSystem2.PEntrez.Gene.Gene_ResultsPanel.Gene_RVDocSum	FLJ21820	FLJ21820	388	http://www.ncbi.nlm.nih.gov/sites/entrez?Db=gene&Cmd=ShowDetailView&TermToSearch=645949&ordinalpos=1&itool=EntrezSystem2.PEntrez.Gene.Gene_ResultsPanel.Gene_RVDocSum	LOC645949	LOC645949	490	3	0.3	1.8	0.2	0.042	0.00033	0.078	-0.4	-0.4	-0.3	-0.1	0.95	0.58	0.21
http://www.ensembl.org/Homo_sapiens/Variation/Summary?v=rs17041988	rs17041988	rs17041988	2	0.91	0.09	0	0	1.4e-05	0.83	-0.16	0.01	G	A	0.2	http://www.ncbi.nlm.nih.gov/sites/entrez?Db=gene&Cmd=ShowDetailView&TermToSearch=338&ordinalpos=1&itool=EntrezSystem2.PEntrez.Gene.Gene_ResultsPanel.Gene_RVDocSum	APOB	APOB	154	http://www.ncbi.nlm.nih.gov/sites/entrez?Db=gene&Cmd=ShowDetailView&TermToSearch=60526&ordinalpos=1&itool=EntrezSystem2.PEntrez.Gene.Gene_ResultsPanel.Gene_RVDocSum	FLJ21820	FLJ21820	388	http://www.ncbi.nlm.nih.gov/sites/entrez?Db=gene&Cmd=ShowDetailView&TermToSearch=645949&ordinalpos=1&itool=EntrezSystem2.PEntrez.Gene.Gene_ResultsPanel.Gene_RVDocSum	LOC645949	LOC645949	490	3	0.3	1.9	0.2	0.042	0.00029	0.079	-0.5	-0.4	-0.3	-0.1	0.95	0.66	0.21
http://www.ensembl.org/Homo_sapiens/Variation/Summary?v=rs7578527	rs7578527	rs7578527	2	0.91	0.09	0	0	1.5e-05	0.77	-0.15	0.01	A	G	0.2	http://www.ncbi.nlm.nih.gov/sites/entrez?Db=gene&Cmd=ShowDetailView&TermToSearch=338&ordinalpos=1&itool=EntrezSystem2.PEntrez.Gene.Gene_ResultsPanel.Gene_RVDocSum	APOB	APOB	155	http://www.ncbi.nlm.nih.gov/sites/entrez?Db=gene&Cmd=ShowDetailView&TermToSearch=60526&ordinalpos=1&itool=EntrezSystem2.PEntrez.Gene.Gene_ResultsPanel.Gene_RVDocSum	FLJ21820	FLJ21820	390	http://www.ncbi.nlm.nih.gov/sites/entrez?Db=gene&Cmd=ShowDetailView&TermToSearch=645949&ordinalpos=1&itool=EntrezSystem2.PEntrez.Gene.Gene_ResultsPanel.Gene_RVDocSum	LOC645949	LOC645949	488	3	0.3	1.9	0.2	0.046	0.00032	0.075	-0.5	-0.4	-0.4	0	0.93	0.74	0.19
http://www.ensembl.org/Homo_sapiens/Variation/Summary?v=rs17042000	rs17042000	rs17042000	2	0.91	0.08	0	0	1.5e-05	0.76	-0.15	0.01	T	C	0.21	http://www.ncbi.nlm.nih.gov/sites/entrez?Db=gene&Cmd=ShowDetailView&TermToSearch=338&ordinalpos=1&itool=EntrezSystem2.PEntrez.Gene.Gene_ResultsPanel.Gene_RVDocSum	APOB	APOB	156	http://www.ncbi.nlm.nih.gov/sites/entrez?Db=gene&Cmd=ShowDetailView&TermToSearch=60526&ordinalpos=1&itool=EntrezSystem2.PEntrez.Gene.Gene_ResultsPanel.Gene_RVDocSum	FLJ21820	FLJ21820	390	http://www.ncbi.nlm.nih.gov/sites/entrez?Db=gene&Cmd=ShowDetailView&TermToSearch=645949&ordinalpos=1&itool=EntrezSystem2.PEntrez.Gene.Gene_ResultsPanel.Gene_RVDocSum	LOC645949	LOC645949	487	3	0.3	1.9	0.2	0.046	0.00033	0.076	-0.5	-0.4	-0.4	0	0.93	0.75	0.18
http://www.ensembl.org/Homo_sapiens/Variation/Summary?v=rs10169543	rs10169543	rs10169543	2	0.93	0.07	0	0	2e-05	0.74	-0.15	0.01	C	T	0.21	http://www.ncbi.nlm.nih.gov/sites/entrez?Db=gene&Cmd=ShowDetailView&TermToSearch=338&ordinalpos=1&itool=EntrezSystem2.PEntrez.Gene.Gene_ResultsPanel.Gene_RVDocSum	APOB	APOB	157	http://www.ncbi.nlm.nih.gov/sites/entrez?Db=gene&Cmd=ShowDetailView&TermToSearch=60526&ordinalpos=1&itool=EntrezSystem2.PEntrez.Gene.Gene_ResultsPanel.Gene_RVDocSum	FLJ21820	FLJ21820	391	http://www.ncbi.nlm.nih.gov/sites/entrez?Db=gene&Cmd=ShowDetailView&TermToSearch=645949&ordinalpos=1&itool=EntrezSystem2.PEntrez.Gene.Gene_ResultsPanel.Gene_RVDocSum	LOC645949	LOC645949	486	2.9	0.2	1.8	0.2	0.048	0.00044	0.077	-0.5	-0.4	-0.4	0	0.92	0.8	0.18
http://www.ensembl.org/Homo_sapiens/Variation/Summary?v=rs12712940	rs12712940	rs12712940	2	0.93	0.07	0	0	2e-05	0.72	-0.15	0.01	A	C	0.21	http://www.ncbi.nlm.nih.gov/sites/entrez?Db=gene&Cmd=ShowDetailView&TermToSearch=338&ordinalpos=1&itool=EntrezSystem2.PEntrez.Gene.Gene_ResultsPanel.Gene_RVDocSum	APOB	APOB	160	http://www.ncbi.nlm.nih.gov/sites/entrez?Db=gene&Cmd=ShowDetailView&TermToSearch=60526&ordinalpos=1&itool=EntrezSystem2.PEntrez.Gene.Gene_ResultsPanel.Gene_RVDocSum	FLJ21820	FLJ21820	394	http://www.ncbi.nlm.nih.gov/sites/entrez?Db=gene&Cmd=ShowDetailView&TermToSearch=645949&ordinalpos=1&itool=EntrezSystem2.PEntrez.Gene.Gene_ResultsPanel.Gene_RVDocSum	LOC645949	LOC645949	484	2.9	0.2	1.8	0.2	0.05	0.00034	0.089	-0.5	-0.4	-0.4	0	0.9	0.82	0.18
http://www.ensembl.org/Homo_sapiens/Variation/Summary?v=rs312051	rs312051	rs312051	2	0.98	0.02	0	0	9.7e-05	0.99	-0.15	0	C	G	0.15	http://www.ncbi.nlm.nih.gov/sites/entrez?Db=gene&Cmd=ShowDetailView&TermToSearch=338&ordinalpos=1&itool=EntrezSystem2.PEntrez.Gene.Gene_ResultsPanel.Gene_RVDocSum	APOB	APOB	162	http://www.ncbi.nlm.nih.gov/sites/entrez?Db=gene&Cmd=ShowDetailView&TermToSearch=60526&ordinalpos=1&itool=EntrezSystem2.PEntrez.Gene.Gene_ResultsPanel.Gene_RVDocSum	FLJ21820	FLJ21820	396	http://www.ncbi.nlm.nih.gov/sites/entrez?Db=gene&Cmd=ShowDetailView&TermToSearch=645949&ordinalpos=1&itool=EntrezSystem2.PEntrez.Gene.Gene_ResultsPanel.Gene_RVDocSum	LOC645949	LOC645949	481	2.3	0.1	2	-0.1	0.088	0.0002	0.23	-0.5	-0.3	-0.3	-0.1	0.58	0.91	0.29
http://www.ensembl.org/Homo_sapiens/Variation/Summary?v=rs365946	rs365946	rs365946	2	0.99	0.01	0	0	0.00017	1	-0.14	0	T	G	0.15	http://www.ncbi.nlm.nih.gov/sites/entrez?Db=gene&Cmd=ShowDetailView&TermToSearch=338&ordinalpos=1&itool=EntrezSystem2.PEntrez.Gene.Gene_ResultsPanel.Gene_RVDocSum	APOB	APOB	172	http://www.ncbi.nlm.nih.gov/sites/entrez?Db=gene&Cmd=ShowDetailView&TermToSearch=60526&ordinalpos=1&itool=EntrezSystem2.PEntrez.Gene.Gene_ResultsPanel.Gene_RVDocSum	FLJ21820	FLJ21820	407	http://www.ncbi.nlm.nih.gov/sites/entrez?Db=gene&Cmd=ShowDetailView&TermToSearch=645949&ordinalpos=1&itool=EntrezSystem2.PEntrez.Gene.Gene_ResultsPanel.Gene_RVDocSum	LOC645949	LOC645949	471	2.1	0	1.9	-0.1	0.097	0.00022	0.27	-0.5	-0.4	-0.3	-0.1	0.6	0.95	0.31
http://www.ensembl.org/Homo_sapiens/Variation/Summary?v=rs17050135	rs17050135	rs17050135	2	0.99	0.01	0	0	0.00012	0.42	-0.2	0.04	T	C	0.06	http://www.ncbi.nlm.nih.gov/sites/entrez?Db=gene&Cmd=ShowDetailView&TermToSearch=647038&ordinalpos=1&itool=EntrezSystem2.PEntrez.Gene.Gene_ResultsPanel.Gene_RVDocSum	LOC647038	LOC647038	0	http://www.ncbi.nlm.nih.gov/sites/entrez?Db=gene&Cmd=ShowDetailView&TermToSearch=730134&ordinalpos=1&itool=EntrezSystem2.PEntrez.Gene.Gene_ResultsPanel.Gene_RVDocSum	LOC730134	LOC730134	104	http://www.ncbi.nlm.nih.gov/sites/entrez?Db=gene&Cmd=ShowDetailView&TermToSearch=644456&ordinalpos=1&itool=EntrezSystem2.PEntrez.Gene.Gene_ResultsPanel.Gene_RVDocSum	LOC644456	LOC644456	892	2.2	0.3	1.8	0	0.048	0.00021	0.31	-0.3	-0.1	-0.2	0	0.25	0.51	0.16
http://www.ensembl.org/Homo_sapiens/Variation/Summary?v=rs3906542	rs3906542	rs3906542	2	0.99	0.01	0	0	0.0002	0.64	-0.12	-0.01	T	C	0.19	http://www.ncbi.nlm.nih.gov/sites/entrez?Db=gene&Cmd=ShowDetailView&TermToSearch=647038&ordinalpos=1&itool=EntrezSystem2.PEntrez.Gene.Gene_ResultsPanel.Gene_RVDocSum	LOC647038	LOC647038	0	http://www.ncbi.nlm.nih.gov/sites/entrez?Db=gene&Cmd=ShowDetailView&TermToSearch=730134&ordinalpos=1&itool=EntrezSystem2.PEntrez.Gene.Gene_ResultsPanel.Gene_RVDocSum	LOC730134	LOC730134	106	http://www.ncbi.nlm.nih.gov/sites/entrez?Db=gene&Cmd=ShowDetailView&TermToSearch=644456&ordinalpos=1&itool=EntrezSystem2.PEntrez.Gene.Gene_ResultsPanel.Gene_RVDocSum	LOC644456	LOC644456	894	2	0.2	1.9	-0.2	0.053	0.00028	0.46	-0.5	-0.5	-0.3	0.1	0.71	0.53	0.12
http://www.ensembl.org/Homo_sapiens/Variation/Summary?v=rs7606152	rs7606152	rs7606152	2	0.96	0.03	0	0	3.4e-05	0.68	-0.26	0.03	G	A	0.08	http://www.ncbi.nlm.nih.gov/sites/entrez?Db=gene&Cmd=ShowDetailView&TermToSearch=647038&ordinalpos=1&itool=EntrezSystem2.PEntrez.Gene.Gene_ResultsPanel.Gene_RVDocSum	LOC647038	LOC647038	0	http://www.ncbi.nlm.nih.gov/sites/entrez?Db=gene&Cmd=ShowDetailView&TermToSearch=730134&ordinalpos=1&itool=EntrezSystem2.PEntrez.Gene.Gene_ResultsPanel.Gene_RVDocSum	LOC730134	LOC730134	109	http://www.ncbi.nlm.nih.gov/sites/entrez?Db=gene&Cmd=ShowDetailView&TermToSearch=644456&ordinalpos=1&itool=EntrezSystem2.PEntrez.Gene.Gene_ResultsPanel.Gene_RVDocSum	LOC644456	LOC644456	897	2.6	0.3	2	-0.1	0.035	9.8e-05	0.42	-0.3	-0.2	-0.2	0	0.43	0.54	0.18
http://www.ensembl.org/Homo_sapiens/Variation/Summary?v=rs17586455	rs17586455	rs17586455	2	0.99	0.01	0	0	0.0004	0.034	-0.18	-0.11	A	T	0.09	http://www.ncbi.nlm.nih.gov/sites/entrez?Db=gene&Cmd=ShowDetailView&TermToSearch=51141&ordinalpos=1&itool=EntrezSystem2.PEntrez.Gene.Gene_ResultsPanel.Gene_RVDocSum	INSIG2	INSIG2	20	http://www.ncbi.nlm.nih.gov/sites/entrez?Db=gene&Cmd=ShowDetailView&TermToSearch=54520&ordinalpos=1&itool=EntrezSystem2.PEntrez.Gene.Gene_ResultsPanel.Gene_RVDocSum	CCDC93	CCDC93	54	http://www.ncbi.nlm.nih.gov/sites/entrez?Db=gene&Cmd=ShowDetailView&TermToSearch=645733&ordinalpos=1&itool=EntrezSystem2.PEntrez.Gene.Gene_ResultsPanel.Gene_RVDocSum	LOC645733	LOC645733	115	2	0.9	0.6	-0.1	0.0054	0.016	0.71	0.3	0.3	-0.1	-0.1	0.044	0.32	0.84
http://www.ensembl.org/Homo_sapiens/Variation/Summary?v=rs17586777	rs17586777	rs17586777	2	0.99	0.01	0	0	0.00036	0.032	-0.16	-0.1	C	A	0.09	http://www.ncbi.nlm.nih.gov/sites/entrez?Db=gene&Cmd=ShowDetailView&TermToSearch=51141&ordinalpos=1&itool=EntrezSystem2.PEntrez.Gene.Gene_ResultsPanel.Gene_RVDocSum	INSIG2	INSIG2	14	http://www.ncbi.nlm.nih.gov/sites/entrez?Db=gene&Cmd=ShowDetailView&TermToSearch=54520&ordinalpos=1&itool=EntrezSystem2.PEntrez.Gene.Gene_ResultsPanel.Gene_RVDocSum	CCDC93	CCDC93	60	http://www.ncbi.nlm.nih.gov/sites/entrez?Db=gene&Cmd=ShowDetailView&TermToSearch=645733&ordinalpos=1&itool=EntrezSystem2.PEntrez.Gene.Gene_ResultsPanel.Gene_RVDocSum	LOC645733	LOC645733	109	2	1	0.5	-0.1	0.0051	0.016	0.71	0.3	0.2	-0.1	-0.1	0.049	0.31	0.87
http://www.ensembl.org/Homo_sapiens/Variation/Summary?v=rs17010907	rs17010907	rs17010907	2	0.98	0.02	0	0	9.1e-05	0.77	0.23	-0.02	G	C	0.07	http://www.ncbi.nlm.nih.gov/sites/entrez?Db=gene&Cmd=ShowDetailView&TermToSearch=129684&ordinalpos=1&itool=EntrezSystem2.PEntrez.Gene.Gene_ResultsPanel.Gene_RVDocSum	CNTNAP5	CNTNAP5	0	http://www.ncbi.nlm.nih.gov/sites/entrez?Db=gene&Cmd=ShowDetailView&TermToSearch=NA&ordinalpos=1&itool=EntrezSystem2.PEntrez.Gene.Gene_ResultsPanel.Gene_RVDocSum	NA	NA	NA	http://www.ncbi.nlm.nih.gov/sites/entrez?Db=gene&Cmd=ShowDetailView&TermToSearch=NA&ordinalpos=1&itool=EntrezSystem2.PEntrez.Gene.Gene_ResultsPanel.Gene_RVDocSum	NA	NA	NA	2.3	0.7	0.5	0.1	0.0087	0.017	0.091	-0.4	-0.2	-0.2	-0.1	0.76	0.55	0.48
http://www.ensembl.org/Homo_sapiens/Variation/Summary?v=rs2048756	rs2048756	rs2048756	2	0.98	0.02	0	0	0.00018	0.14	-0.09	-0.04	A	G	0.42	http://www.ncbi.nlm.nih.gov/sites/entrez?Db=gene&Cmd=ShowDetailView&TermToSearch=7315&ordinalpos=1&itool=EntrezSystem2.PEntrez.Gene.Gene_ResultsPanel.Gene_RVDocSum	UBBP1	UBBP1	68	http://www.ncbi.nlm.nih.gov/sites/entrez?Db=gene&Cmd=ShowDetailView&TermToSearch=389053&ordinalpos=1&itool=EntrezSystem2.PEntrez.Gene.Gene_ResultsPanel.Gene_RVDocSum	LOC389053	LOC389053	198	http://www.ncbi.nlm.nih.gov/sites/entrez?Db=gene&Cmd=ShowDetailView&TermToSearch=7852&ordinalpos=1&itool=EntrezSystem2.PEntrez.Gene.Gene_ResultsPanel.Gene_RVDocSum	CXCR4	CXCR4	280	2.2	2.1	0.1	-0.3	0.00017	0.089	0.63	-0.3	0.3	-0.5	-0.3	0.043	0.72	0.8
http://www.ensembl.org/Homo_sapiens/Variation/Summary?v=rs12474824	rs12474824	rs12474824	2	0.99	0	0	0.01	0.0018	8.1e-05	-0.37	-0.47	C	T	0.08	http://www.ncbi.nlm.nih.gov/sites/entrez?Db=gene&Cmd=ShowDetailView&TermToSearch=2820&ordinalpos=1&itool=EntrezSystem2.PEntrez.Gene.Gene_ResultsPanel.Gene_RVDocSum	GPD2	GPD2	0	http://www.ncbi.nlm.nih.gov/sites/entrez?Db=gene&Cmd=ShowDetailView&TermToSearch=728038&ordinalpos=1&itool=EntrezSystem2.PEntrez.Gene.Gene_ResultsPanel.Gene_RVDocSum	LOC728038	LOC728038	117	http://www.ncbi.nlm.nih.gov/sites/entrez?Db=gene&Cmd=ShowDetailView&TermToSearch=4929&ordinalpos=1&itool=EntrezSystem2.PEntrez.Gene.Gene_ResultsPanel.Gene_RVDocSum	NR4A2	NR4A2	221	1	0.3	0.4	0	0.035	0.014	0.57	2	0.7	0.2	0.1	0.0039	0.033	0.076
http://www.ensembl.org/Homo_sapiens/Variation/Summary?v=rs2139939	rs2139939	rs2139939	2	0.98	0.02	0	0	0.00038	0.48	0.1	0.02	T	C	0.28	http://www.ncbi.nlm.nih.gov/sites/entrez?Db=gene&Cmd=ShowDetailView&TermToSearch=2066&ordinalpos=1&itool=EntrezSystem2.PEntrez.Gene.Gene_ResultsPanel.Gene_RVDocSum	ERBB4	ERBB4	0	http://www.ncbi.nlm.nih.gov/sites/entrez?Db=gene&Cmd=ShowDetailView&TermToSearch=729699&ordinalpos=1&itool=EntrezSystem2.PEntrez.Gene.Gene_ResultsPanel.Gene_RVDocSum	LOC729699	LOC729699	512	http://www.ncbi.nlm.nih.gov/sites/entrez?Db=gene&Cmd=ShowDetailView&TermToSearch=646249&ordinalpos=1&itool=EntrezSystem2.PEntrez.Gene.Gene_ResultsPanel.Gene_RVDocSum	LOC646249	LOC646249	805	2.3	2	0.4	-0.3	0.00038	0.03	0.52	-0.5	-0.3	-0.4	-0.3	0.31	0.88	0.81
http://www.ensembl.org/Homo_sapiens/Variation/Summary?v=rs11676402	rs11676402	rs11676402	2	0.99	0.01	0	0	0.00021	0.17	0.18	-0.07	C	T	0.08	http://www.ncbi.nlm.nih.gov/sites/entrez?Db=gene&Cmd=ShowDetailView&TermToSearch=3488&ordinalpos=1&itool=EntrezSystem2.PEntrez.Gene.Gene_ResultsPanel.Gene_RVDocSum	IGFBP5	IGFBP5	36	http://www.ncbi.nlm.nih.gov/sites/entrez?Db=gene&Cmd=ShowDetailView&TermToSearch=3485&ordinalpos=1&itool=EntrezSystem2.PEntrez.Gene.Gene_ResultsPanel.Gene_RVDocSum	IGFBP2	IGFBP2	67	http://www.ncbi.nlm.nih.gov/sites/entrez?Db=gene&Cmd=ShowDetailView&TermToSearch=130700&ordinalpos=1&itool=EntrezSystem2.PEntrez.Gene.Gene_ResultsPanel.Gene_RVDocSum	LOC130700	LOC130700	121	2.1	0.4	0.2	0.7	0.029	0.066	0.008	-0.1	0.7	0	-0.1	0.0098	0.2	0.44
http://www.ensembl.org/Homo_sapiens/Variation/Summary?v=rs13424509	rs13424509	rs13424509	2	0.98	0.01	0	0	0.00013	0.19	0.13	0.05	G	A	0.13	http://www.ncbi.nlm.nih.gov/sites/entrez?Db=gene&Cmd=ShowDetailView&TermToSearch=23704&ordinalpos=1&itool=EntrezSystem2.PEntrez.Gene.Gene_ResultsPanel.Gene_RVDocSum	KCNE4	KCNE4	233	http://www.ncbi.nlm.nih.gov/sites/entrez?Db=gene&Cmd=ShowDetailView&TermToSearch=7857&ordinalpos=1&itool=EntrezSystem2.PEntrez.Gene.Gene_ResultsPanel.Gene_RVDocSum	SCG2	SCG2	310	http://www.ncbi.nlm.nih.gov/sites/entrez?Db=gene&Cmd=ShowDetailView&TermToSearch=2181&ordinalpos=1&itool=EntrezSystem2.PEntrez.Gene.Gene_ResultsPanel.Gene_RVDocSum	ACSL3	ACSL3	343	2.2	0.1	2	-0.1	0.086	0.00017	0.32	-0.3	-0.3	-0.2	-0.2	0.31	0.29	0.92
http://www.ensembl.org/Homo_sapiens/Variation/Summary?v=rs13412714	rs13412714	rs13412714	2	0.98	0.02	0	0	0.00012	0.2	0.13	0.04	C	T	0.13	http://www.ncbi.nlm.nih.gov/sites/entrez?Db=gene&Cmd=ShowDetailView&TermToSearch=23704&ordinalpos=1&itool=EntrezSystem2.PEntrez.Gene.Gene_ResultsPanel.Gene_RVDocSum	KCNE4	KCNE4	233	http://www.ncbi.nlm.nih.gov/sites/entrez?Db=gene&Cmd=ShowDetailView&TermToSearch=7857&ordinalpos=1&itool=EntrezSystem2.PEntrez.Gene.Gene_ResultsPanel.Gene_RVDocSum	SCG2	SCG2	310	http://www.ncbi.nlm.nih.gov/sites/entrez?Db=gene&Cmd=ShowDetailView&TermToSearch=2181&ordinalpos=1&itool=EntrezSystem2.PEntrez.Gene.Gene_ResultsPanel.Gene_RVDocSum	ACSL3	ACSL3	343	2.3	0.1	2.1	-0.1	0.086	0.00015	0.31	-0.3	-0.3	-0.2	-0.2	0.31	0.31	0.92
http://www.ensembl.org/Homo_sapiens/Variation/Summary?v=rs2090504	rs2090504	rs2090504	2	0.98	0.02	0	0	0.00012	0.2	0.13	0.04	T	C	0.13	http://www.ncbi.nlm.nih.gov/sites/entrez?Db=gene&Cmd=ShowDetailView&TermToSearch=23704&ordinalpos=1&itool=EntrezSystem2.PEntrez.Gene.Gene_ResultsPanel.Gene_RVDocSum	KCNE4	KCNE4	246	http://www.ncbi.nlm.nih.gov/sites/entrez?Db=gene&Cmd=ShowDetailView&TermToSearch=7857&ordinalpos=1&itool=EntrezSystem2.PEntrez.Gene.Gene_ResultsPanel.Gene_RVDocSum	SCG2	SCG2	297	http://www.ncbi.nlm.nih.gov/sites/entrez?Db=gene&Cmd=ShowDetailView&TermToSearch=2181&ordinalpos=1&itool=EntrezSystem2.PEntrez.Gene.Gene_ResultsPanel.Gene_RVDocSum	ACSL3	ACSL3	356	2.3	0.1	2.1	-0.1	0.084	0.00015	0.31	-0.3	-0.3	-0.2	-0.2	0.31	0.31	0.92
http://www.ensembl.org/Homo_sapiens/Variation/Summary?v=rs6709028	rs6709028	rs6709028	2	0.99	0.01	0	0	0.00018	0.18	0.14	0.05	T	G	0.13	http://www.ncbi.nlm.nih.gov/sites/entrez?Db=gene&Cmd=ShowDetailView&TermToSearch=23704&ordinalpos=1&itool=EntrezSystem2.PEntrez.Gene.Gene_ResultsPanel.Gene_RVDocSum	KCNE4	KCNE4	247	http://www.ncbi.nlm.nih.gov/sites/entrez?Db=gene&Cmd=ShowDetailView&TermToSearch=7857&ordinalpos=1&itool=EntrezSystem2.PEntrez.Gene.Gene_ResultsPanel.Gene_RVDocSum	SCG2	SCG2	296	http://www.ncbi.nlm.nih.gov/sites/entrez?Db=gene&Cmd=ShowDetailView&TermToSearch=2181&ordinalpos=1&itool=EntrezSystem2.PEntrez.Gene.Gene_ResultsPanel.Gene_RVDocSum	ACSL3	ACSL3	357	2.1	0.1	1.9	-0.1	0.089	0.00021	0.35	-0.2	-0.2	-0.2	-0.2	0.28	0.29	0.86
http://www.ensembl.org/Homo_sapiens/Variation/Summary?v=rs10168471	rs10168471	rs10168471	2	0.98	0.02	0	0	0.00012	0.2	0.13	0.04	G	C	0.13	http://www.ncbi.nlm.nih.gov/sites/entrez?Db=gene&Cmd=ShowDetailView&TermToSearch=23704&ordinalpos=1&itool=EntrezSystem2.PEntrez.Gene.Gene_ResultsPanel.Gene_RVDocSum	KCNE4	KCNE4	249	http://www.ncbi.nlm.nih.gov/sites/entrez?Db=gene&Cmd=ShowDetailView&TermToSearch=7857&ordinalpos=1&itool=EntrezSystem2.PEntrez.Gene.Gene_ResultsPanel.Gene_RVDocSum	SCG2	SCG2	294	http://www.ncbi.nlm.nih.gov/sites/entrez?Db=gene&Cmd=ShowDetailView&TermToSearch=2181&ordinalpos=1&itool=EntrezSystem2.PEntrez.Gene.Gene_ResultsPanel.Gene_RVDocSum	ACSL3	ACSL3	359	2.3	0.1	2.1	-0.1	0.085	0.00015	0.31	-0.3	-0.3	-0.2	-0.2	0.31	0.31	0.92
http://www.ensembl.org/Homo_sapiens/Variation/Summary?v=rs13414858	rs13414858	rs13414858	2	0.98	0.02	0	0	0.00012	0.2	0.13	0.04	C	A	0.13	http://www.ncbi.nlm.nih.gov/sites/entrez?Db=gene&Cmd=ShowDetailView&TermToSearch=23704&ordinalpos=1&itool=EntrezSystem2.PEntrez.Gene.Gene_ResultsPanel.Gene_RVDocSum	KCNE4	KCNE4	249	http://www.ncbi.nlm.nih.gov/sites/entrez?Db=gene&Cmd=ShowDetailView&TermToSearch=7857&ordinalpos=1&itool=EntrezSystem2.PEntrez.Gene.Gene_ResultsPanel.Gene_RVDocSum	SCG2	SCG2	294	http://www.ncbi.nlm.nih.gov/sites/entrez?Db=gene&Cmd=ShowDetailView&TermToSearch=2181&ordinalpos=1&itool=EntrezSystem2.PEntrez.Gene.Gene_ResultsPanel.Gene_RVDocSum	ACSL3	ACSL3	360	2.3	0.1	2.1	-0.1	0.084	0.00015	0.31	-0.3	-0.3	-0.2	-0.2	0.31	0.31	0.92
http://www.ensembl.org/Homo_sapiens/Variation/Summary?v=rs12471688	rs12471688	rs12471688	2	0.91	0.09	0	0	2.3e-05	0.7	0.13	0.01	A	G	0.21	http://www.ncbi.nlm.nih.gov/sites/entrez?Db=gene&Cmd=ShowDetailView&TermToSearch=23677&ordinalpos=1&itool=EntrezSystem2.PEntrez.Gene.Gene_ResultsPanel.Gene_RVDocSum	SH3BP4	SH3BP4	0	http://www.ncbi.nlm.nih.gov/sites/entrez?Db=gene&Cmd=ShowDetailView&TermToSearch=642692&ordinalpos=1&itool=EntrezSystem2.PEntrez.Gene.Gene_ResultsPanel.Gene_RVDocSum	LOC642692	LOC642692	123	http://www.ncbi.nlm.nih.gov/sites/entrez?Db=gene&Cmd=ShowDetailView&TermToSearch=116987&ordinalpos=1&itool=EntrezSystem2.PEntrez.Gene.Gene_ResultsPanel.Gene_RVDocSum	CENTG2	CENTG2	470	3	2.5	0.2	-0.2	5.5e-05	0.056	0.48	-0.5	-0.4	-0.3	-0.1	0.74	0.59	0.19
http://www.ensembl.org/Homo_sapiens/Variation/Summary?v=rs10199034	rs10199034	rs10199034	2	0.95	0.05	0	0	3.1e-05	0.62	0.11	0.01	C	G	0.24	http://www.ncbi.nlm.nih.gov/sites/entrez?Db=gene&Cmd=ShowDetailView&TermToSearch=23677&ordinalpos=1&itool=EntrezSystem2.PEntrez.Gene.Gene_ResultsPanel.Gene_RVDocSum	SH3BP4	SH3BP4	0	http://www.ncbi.nlm.nih.gov/sites/entrez?Db=gene&Cmd=ShowDetailView&TermToSearch=642692&ordinalpos=1&itool=EntrezSystem2.PEntrez.Gene.Gene_ResultsPanel.Gene_RVDocSum	LOC642692	LOC642692	120	http://www.ncbi.nlm.nih.gov/sites/entrez?Db=gene&Cmd=ShowDetailView&TermToSearch=116987&ordinalpos=1&itool=EntrezSystem2.PEntrez.Gene.Gene_ResultsPanel.Gene_RVDocSum	CENTG2	CENTG2	467	2.8	2.6	0.4	-0.3	4.8e-05	0.038	0.98	-0.5	-0.5	-0.3	0.3	0.89	0.54	0.035
http://www.ensembl.org/Homo_sapiens/Variation/Summary?v=rs2195195	rs2195195	rs2195195	2	0.94	0.06	0	0	2.4e-05	0.64	0.11	0.01	C	T	0.23	http://www.ncbi.nlm.nih.gov/sites/entrez?Db=gene&Cmd=ShowDetailView&TermToSearch=23677&ordinalpos=1&itool=EntrezSystem2.PEntrez.Gene.Gene_ResultsPanel.Gene_RVDocSum	SH3BP4	SH3BP4	0	http://www.ncbi.nlm.nih.gov/sites/entrez?Db=gene&Cmd=ShowDetailView&TermToSearch=642692&ordinalpos=1&itool=EntrezSystem2.PEntrez.Gene.Gene_ResultsPanel.Gene_RVDocSum	LOC642692	LOC642692	117	http://www.ncbi.nlm.nih.gov/sites/entrez?Db=gene&Cmd=ShowDetailView&TermToSearch=116987&ordinalpos=1&itool=EntrezSystem2.PEntrez.Gene.Gene_ResultsPanel.Gene_RVDocSum	CENTG2	CENTG2	464	2.9	2.5	0.4	-0.3	5.7e-05	0.03	0.89	-0.5	-0.5	-0.4	0.4	0.99	0.57	0.029
http://www.ensembl.org/Homo_sapiens/Variation/Summary?v=rs13020554	rs13020554	rs13020554	2	0.98	0	0	0.01	0.37	4.4e-06	0.02	0.12	A	G	0.29	http://www.ncbi.nlm.nih.gov/sites/entrez?Db=gene&Cmd=ShowDetailView&TermToSearch=642692&ordinalpos=1&itool=EntrezSystem2.PEntrez.Gene.Gene_ResultsPanel.Gene_RVDocSum	LOC642692	LOC642692	158	http://www.ncbi.nlm.nih.gov/sites/entrez?Db=gene&Cmd=ShowDetailView&TermToSearch=116987&ordinalpos=1&itool=EntrezSystem2.PEntrez.Gene.Gene_ResultsPanel.Gene_RVDocSum	CENTG2	CENTG2	189	http://www.ncbi.nlm.nih.gov/sites/entrez?Db=gene&Cmd=ShowDetailView&TermToSearch=23677&ordinalpos=1&itool=EntrezSystem2.PEntrez.Gene.Gene_ResultsPanel.Gene_RVDocSum	SH3BP4	SH3BP4	250	-0.6	-0.6	-0.3	-0.1	0.93	0.35	0.26	3.7	2.5	-0.3	1.3	8.9e-05	0.36	0.0014
http://www.ensembl.org/Homo_sapiens/Variation/Summary?v=rs1377451	rs1377451	rs1377451	2	0.86	0	0.03	0.1	0.38	2.6e-07	-0.03	-0.16	T	C	0.16	http://www.ncbi.nlm.nih.gov/sites/entrez?Db=gene&Cmd=ShowDetailView&TermToSearch=401036&ordinalpos=1&itool=EntrezSystem2.PEntrez.Gene.Gene_ResultsPanel.Gene_RVDocSum	ASB18	ASB18	5	http://www.ncbi.nlm.nih.gov/sites/entrez?Db=gene&Cmd=ShowDetailView&TermToSearch=728087&ordinalpos=1&itool=EntrezSystem2.PEntrez.Gene.Gene_ResultsPanel.Gene_RVDocSum	LOC728087	LOC728087	69	http://www.ncbi.nlm.nih.gov/sites/entrez?Db=gene&Cmd=ShowDetailView&TermToSearch=79781&ordinalpos=1&itool=EntrezSystem2.PEntrez.Gene.Gene_ResultsPanel.Gene_RVDocSum	IQCA	IQCA	77	-0.5	-0.4	0	-0.2	0.71	0.1	0.62	4.6	2	1.2	0.2	0.00022	0.0022	0.062
http://www.ensembl.org/Homo_sapiens/Variation/Summary?v=rs1377449	rs1377449	rs1377449	2	0.85	0	0.04	0.11	0.39	2.5e-07	-0.03	-0.16	C	T	0.16	http://www.ncbi.nlm.nih.gov/sites/entrez?Db=gene&Cmd=ShowDetailView&TermToSearch=401036&ordinalpos=1&itool=EntrezSystem2.PEntrez.Gene.Gene_ResultsPanel.Gene_RVDocSum	ASB18	ASB18	6	http://www.ncbi.nlm.nih.gov/sites/entrez?Db=gene&Cmd=ShowDetailView&TermToSearch=728087&ordinalpos=1&itool=EntrezSystem2.PEntrez.Gene.Gene_ResultsPanel.Gene_RVDocSum	LOC728087	LOC728087	69	http://www.ncbi.nlm.nih.gov/sites/entrez?Db=gene&Cmd=ShowDetailView&TermToSearch=79781&ordinalpos=1&itool=EntrezSystem2.PEntrez.Gene.Gene_ResultsPanel.Gene_RVDocSum	IQCA	IQCA	77	-0.5	-0.4	0.1	-0.2	0.7	0.098	0.62	4.6	2	1.2	0.2	0.00021	0.0022	0.059
http://www.ensembl.org/Homo_sapiens/Variation/Summary?v=rs13390159	rs13390159	rs13390159	2	0.83	0	0.04	0.13	0.35	2.1e-07	-0.03	-0.16	A	G	0.16	http://www.ncbi.nlm.nih.gov/sites/entrez?Db=gene&Cmd=ShowDetailView&TermToSearch=401036&ordinalpos=1&itool=EntrezSystem2.PEntrez.Gene.Gene_ResultsPanel.Gene_RVDocSum	ASB18	ASB18	6	http://www.ncbi.nlm.nih.gov/sites/entrez?Db=gene&Cmd=ShowDetailView&TermToSearch=728087&ordinalpos=1&itool=EntrezSystem2.PEntrez.Gene.Gene_ResultsPanel.Gene_RVDocSum	LOC728087	LOC728087	70	http://www.ncbi.nlm.nih.gov/sites/entrez?Db=gene&Cmd=ShowDetailView&TermToSearch=79781&ordinalpos=1&itool=EntrezSystem2.PEntrez.Gene.Gene_ResultsPanel.Gene_RVDocSum	IQCA	IQCA	76	-0.4	-0.4	0.1	-0.2	0.71	0.086	0.61	4.7	2	1.2	0.3	0.00021	0.0023	0.046
http://www.ensembl.org/Homo_sapiens/Variation/Summary?v=rs13416480	rs13416480	rs13416480	2	0.85	0	0.04	0.12	0.37	2.4e-07	-0.03	-0.17	T	C	0.16	http://www.ncbi.nlm.nih.gov/sites/entrez?Db=gene&Cmd=ShowDetailView&TermToSearch=401036&ordinalpos=1&itool=EntrezSystem2.PEntrez.Gene.Gene_ResultsPanel.Gene_RVDocSum	ASB18	ASB18	6	http://www.ncbi.nlm.nih.gov/sites/entrez?Db=gene&Cmd=ShowDetailView&TermToSearch=728087&ordinalpos=1&itool=EntrezSystem2.PEntrez.Gene.Gene_ResultsPanel.Gene_RVDocSum	LOC728087	LOC728087	70	http://www.ncbi.nlm.nih.gov/sites/entrez?Db=gene&Cmd=ShowDetailView&TermToSearch=79781&ordinalpos=1&itool=EntrezSystem2.PEntrez.Gene.Gene_ResultsPanel.Gene_RVDocSum	IQCA	IQCA	76	-0.5	-0.4	0.1	-0.2	0.7	0.096	0.61	4.6	2	1.2	0.2	0.00021	0.0021	0.058
http://www.ensembl.org/Homo_sapiens/Variation/Summary?v=rs7598462	rs7598462	rs7598462	2	0.85	0	0.04	0.12	0.37	2.3e-07	-0.03	-0.17	C	T	0.16	http://www.ncbi.nlm.nih.gov/sites/entrez?Db=gene&Cmd=ShowDetailView&TermToSearch=401036&ordinalpos=1&itool=EntrezSystem2.PEntrez.Gene.Gene_ResultsPanel.Gene_RVDocSum	ASB18	ASB18	8	http://www.ncbi.nlm.nih.gov/sites/entrez?Db=gene&Cmd=ShowDetailView&TermToSearch=728087&ordinalpos=1&itool=EntrezSystem2.PEntrez.Gene.Gene_ResultsPanel.Gene_RVDocSum	LOC728087	LOC728087	71	http://www.ncbi.nlm.nih.gov/sites/entrez?Db=gene&Cmd=ShowDetailView&TermToSearch=79781&ordinalpos=1&itool=EntrezSystem2.PEntrez.Gene.Gene_ResultsPanel.Gene_RVDocSum	IQCA	IQCA	74	-0.5	-0.4	0.1	-0.2	0.7	0.096	0.61	4.6	2	1.2	0.2	0.00021	0.0021	0.058
http://www.ensembl.org/Homo_sapiens/Variation/Summary?v=rs7598601	rs7598601	rs7598601	2	0.85	0	0.04	0.12	0.37	2.3e-07	-0.03	-0.17	G	A	0.16	http://www.ncbi.nlm.nih.gov/sites/entrez?Db=gene&Cmd=ShowDetailView&TermToSearch=401036&ordinalpos=1&itool=EntrezSystem2.PEntrez.Gene.Gene_ResultsPanel.Gene_RVDocSum	ASB18	ASB18	8	http://www.ncbi.nlm.nih.gov/sites/entrez?Db=gene&Cmd=ShowDetailView&TermToSearch=728087&ordinalpos=1&itool=EntrezSystem2.PEntrez.Gene.Gene_ResultsPanel.Gene_RVDocSum	LOC728087	LOC728087	72	http://www.ncbi.nlm.nih.gov/sites/entrez?Db=gene&Cmd=ShowDetailView&TermToSearch=79781&ordinalpos=1&itool=EntrezSystem2.PEntrez.Gene.Gene_ResultsPanel.Gene_RVDocSum	IQCA	IQCA	74	-0.5	-0.4	0.1	-0.2	0.7	0.097	0.61	4.6	2	1.2	0.2	0.00021	0.0021	0.058
http://www.ensembl.org/Homo_sapiens/Variation/Summary?v=rs2177444	rs2177444	rs2177444	3	0.95	0.04	0	0	3.7e-05	0.52	-0.11	-0.02	G	T	0.24	http://www.ncbi.nlm.nih.gov/sites/entrez?Db=gene&Cmd=ShowDetailView&TermToSearch=402123&ordinalpos=1&itool=EntrezSystem2.PEntrez.Gene.Gene_ResultsPanel.Gene_RVDocSum	LOC402123	LOC402123	217	http://www.ncbi.nlm.nih.gov/sites/entrez?Db=gene&Cmd=ShowDetailView&TermToSearch=27255&ordinalpos=1&itool=EntrezSystem2.PEntrez.Gene.Gene_ResultsPanel.Gene_RVDocSum	CNTN6	CNTN6	258	http://www.ncbi.nlm.nih.gov/sites/entrez?Db=gene&Cmd=ShowDetailView&TermToSearch=10752&ordinalpos=1&itool=EntrezSystem2.PEntrez.Gene.Gene_ResultsPanel.Gene_RVDocSum	CHL1	CHL1	426	2.7	-0.2	1.4	1.3	0.16	0.0013	0.0012	-0.6	-0.4	0.5	-0.3	0.41	0.019	0.74
http://www.ensembl.org/Homo_sapiens/Variation/Summary?v=rs1464700	rs1464700	rs1464700	3	0.98	0.02	0	0	0.00013	0.67	0.1	0.01	C	T	0.4	http://www.ncbi.nlm.nih.gov/sites/entrez?Db=gene&Cmd=ShowDetailView&TermToSearch=402123&ordinalpos=1&itool=EntrezSystem2.PEntrez.Gene.Gene_ResultsPanel.Gene_RVDocSum	LOC402123	LOC402123	217	http://www.ncbi.nlm.nih.gov/sites/entrez?Db=gene&Cmd=ShowDetailView&TermToSearch=27255&ordinalpos=1&itool=EntrezSystem2.PEntrez.Gene.Gene_ResultsPanel.Gene_RVDocSum	CNTN6	CNTN6	258	http://www.ncbi.nlm.nih.gov/sites/entrez?Db=gene&Cmd=ShowDetailView&TermToSearch=10752&ordinalpos=1&itool=EntrezSystem2.PEntrez.Gene.Gene_ResultsPanel.Gene_RVDocSum	CHL1	CHL1	426	2.4	-0.4	2.1	0.8	0.49	0.00017	0.014	-0.6	-0.3	-0.1	-0.3	0.31	0.18	0.54
http://www.ensembl.org/Homo_sapiens/Variation/Summary?v=rs1568748	rs1568748	rs1568748	3	0.96	0.04	0	0	4e-05	0.49	-0.11	-0.02	G	A	0.24	http://www.ncbi.nlm.nih.gov/sites/entrez?Db=gene&Cmd=ShowDetailView&TermToSearch=402123&ordinalpos=1&itool=EntrezSystem2.PEntrez.Gene.Gene_ResultsPanel.Gene_RVDocSum	LOC402123	LOC402123	217	http://www.ncbi.nlm.nih.gov/sites/entrez?Db=gene&Cmd=ShowDetailView&TermToSearch=27255&ordinalpos=1&itool=EntrezSystem2.PEntrez.Gene.Gene_ResultsPanel.Gene_RVDocSum	CNTN6	CNTN6	257	http://www.ncbi.nlm.nih.gov/sites/entrez?Db=gene&Cmd=ShowDetailView&TermToSearch=10752&ordinalpos=1&itool=EntrezSystem2.PEntrez.Gene.Gene_ResultsPanel.Gene_RVDocSum	CHL1	CHL1	426	2.7	-0.2	1.3	1.4	0.16	0.0015	0.001	-0.6	-0.4	0.5	-0.3	0.43	0.016	0.74
http://www.ensembl.org/Homo_sapiens/Variation/Summary?v=rs4684579	rs4684579	rs4684579	3	0.98	0.02	0	0	0.00012	0.66	0.1	0.01	G	A	0.4	http://www.ncbi.nlm.nih.gov/sites/entrez?Db=gene&Cmd=ShowDetailView&TermToSearch=402123&ordinalpos=1&itool=EntrezSystem2.PEntrez.Gene.Gene_ResultsPanel.Gene_RVDocSum	LOC402123	LOC402123	218	http://www.ncbi.nlm.nih.gov/sites/entrez?Db=gene&Cmd=ShowDetailView&TermToSearch=27255&ordinalpos=1&itool=EntrezSystem2.PEntrez.Gene.Gene_ResultsPanel.Gene_RVDocSum	CNTN6	CNTN6	257	http://www.ncbi.nlm.nih.gov/sites/entrez?Db=gene&Cmd=ShowDetailView&TermToSearch=10752&ordinalpos=1&itool=EntrezSystem2.PEntrez.Gene.Gene_ResultsPanel.Gene_RVDocSum	CHL1	CHL1	427	2.4	-0.4	2.1	0.8	0.49	0.00016	0.014	-0.6	-0.3	-0.1	-0.3	0.32	0.18	0.55
http://www.ensembl.org/Homo_sapiens/Variation/Summary?v=rs13066217	rs13066217	rs13066217	3	0.95	0.05	0	0	3.5e-05	0.46	-0.11	-0.02	T	C	0.24	http://www.ncbi.nlm.nih.gov/sites/entrez?Db=gene&Cmd=ShowDetailView&TermToSearch=402123&ordinalpos=1&itool=EntrezSystem2.PEntrez.Gene.Gene_ResultsPanel.Gene_RVDocSum	LOC402123	LOC402123	218	http://www.ncbi.nlm.nih.gov/sites/entrez?Db=gene&Cmd=ShowDetailView&TermToSearch=27255&ordinalpos=1&itool=EntrezSystem2.PEntrez.Gene.Gene_ResultsPanel.Gene_RVDocSum	CNTN6	CNTN6	257	http://www.ncbi.nlm.nih.gov/sites/entrez?Db=gene&Cmd=ShowDetailView&TermToSearch=10752&ordinalpos=1&itool=EntrezSystem2.PEntrez.Gene.Gene_ResultsPanel.Gene_RVDocSum	CHL1	CHL1	427	2.7	-0.2	1.3	1.4	0.16	0.0014	0.0011	-0.6	-0.4	0.5	-0.3	0.46	0.017	0.73
http://www.ensembl.org/Homo_sapiens/Variation/Summary?v=rs13066227	rs13066227	rs13066227	3	0.95	0.05	0	0	3.6e-05	0.46	-0.11	-0.02	A	C	0.24	http://www.ncbi.nlm.nih.gov/sites/entrez?Db=gene&Cmd=ShowDetailView&TermToSearch=402123&ordinalpos=1&itool=EntrezSystem2.PEntrez.Gene.Gene_ResultsPanel.Gene_RVDocSum	LOC402123	LOC402123	218	http://www.ncbi.nlm.nih.gov/sites/entrez?Db=gene&Cmd=ShowDetailView&TermToSearch=27255&ordinalpos=1&itool=EntrezSystem2.PEntrez.Gene.Gene_ResultsPanel.Gene_RVDocSum	CNTN6	CNTN6	257	http://www.ncbi.nlm.nih.gov/sites/entrez?Db=gene&Cmd=ShowDetailView&TermToSearch=10752&ordinalpos=1&itool=EntrezSystem2.PEntrez.Gene.Gene_ResultsPanel.Gene_RVDocSum	CHL1	CHL1	427	2.7	-0.2	1.3	1.4	0.16	0.0014	0.0011	-0.6	-0.4	0.5	-0.3	0.47	0.017	0.73
http://www.ensembl.org/Homo_sapiens/Variation/Summary?v=rs12494851	rs12494851	rs12494851	3	0.95	0.05	0	0	3.6e-05	0.46	-0.11	-0.02	G	A	0.24	http://www.ncbi.nlm.nih.gov/sites/entrez?Db=gene&Cmd=ShowDetailView&TermToSearch=402123&ordinalpos=1&itool=EntrezSystem2.PEntrez.Gene.Gene_ResultsPanel.Gene_RVDocSum	LOC402123	LOC402123	218	http://www.ncbi.nlm.nih.gov/sites/entrez?Db=gene&Cmd=ShowDetailView&TermToSearch=27255&ordinalpos=1&itool=EntrezSystem2.PEntrez.Gene.Gene_ResultsPanel.Gene_RVDocSum	CNTN6	CNTN6	256	http://www.ncbi.nlm.nih.gov/sites/entrez?Db=gene&Cmd=ShowDetailView&TermToSearch=10752&ordinalpos=1&itool=EntrezSystem2.PEntrez.Gene.Gene_ResultsPanel.Gene_RVDocSum	CHL1	CHL1	427	2.7	-0.2	1.3	1.4	0.16	0.0014	0.0011	-0.6	-0.4	0.5	-0.3	0.48	0.017	0.73
http://www.ensembl.org/Homo_sapiens/Variation/Summary?v=rs13084891	rs13084891	rs13084891	3	0.95	0.05	0	0	3.3e-05	0.5	-0.11	-0.02	C	T	0.24	http://www.ncbi.nlm.nih.gov/sites/entrez?Db=gene&Cmd=ShowDetailView&TermToSearch=402123&ordinalpos=1&itool=EntrezSystem2.PEntrez.Gene.Gene_ResultsPanel.Gene_RVDocSum	LOC402123	LOC402123	218	http://www.ncbi.nlm.nih.gov/sites/entrez?Db=gene&Cmd=ShowDetailView&TermToSearch=27255&ordinalpos=1&itool=EntrezSystem2.PEntrez.Gene.Gene_ResultsPanel.Gene_RVDocSum	CNTN6	CNTN6	256	http://www.ncbi.nlm.nih.gov/sites/entrez?Db=gene&Cmd=ShowDetailView&TermToSearch=10752&ordinalpos=1&itool=EntrezSystem2.PEntrez.Gene.Gene_ResultsPanel.Gene_RVDocSum	CHL1	CHL1	427	2.7	-0.2	1.3	1.4	0.14	0.0014	0.0011	-0.6	-0.4	0.5	-0.3	0.44	0.017	0.74
http://www.ensembl.org/Homo_sapiens/Variation/Summary?v=rs12495737	rs12495737	rs12495737	3	0.96	0.04	0	0	4e-05	0.47	-0.11	-0.02	C	T	0.24	http://www.ncbi.nlm.nih.gov/sites/entrez?Db=gene&Cmd=ShowDetailView&TermToSearch=402123&ordinalpos=1&itool=EntrezSystem2.PEntrez.Gene.Gene_ResultsPanel.Gene_RVDocSum	LOC402123	LOC402123	219	http://www.ncbi.nlm.nih.gov/sites/entrez?Db=gene&Cmd=ShowDetailView&TermToSearch=27255&ordinalpos=1&itool=EntrezSystem2.PEntrez.Gene.Gene_ResultsPanel.Gene_RVDocSum	CNTN6	CNTN6	256	http://www.ncbi.nlm.nih.gov/sites/entrez?Db=gene&Cmd=ShowDetailView&TermToSearch=10752&ordinalpos=1&itool=EntrezSystem2.PEntrez.Gene.Gene_ResultsPanel.Gene_RVDocSum	CHL1	CHL1	427	2.7	-0.2	1.3	1.3	0.16	0.0014	0.0011	-0.6	-0.4	0.5	-0.3	0.47	0.017	0.74
http://www.ensembl.org/Homo_sapiens/Variation/Summary?v=rs17048862	rs17048862	rs17048862	3	0.96	0.04	0	0	4e-05	0.47	-0.11	-0.02	C	T	0.24	http://www.ncbi.nlm.nih.gov/sites/entrez?Db=gene&Cmd=ShowDetailView&TermToSearch=402123&ordinalpos=1&itool=EntrezSystem2.PEntrez.Gene.Gene_ResultsPanel.Gene_RVDocSum	LOC402123	LOC402123	219	http://www.ncbi.nlm.nih.gov/sites/entrez?Db=gene&Cmd=ShowDetailView&TermToSearch=27255&ordinalpos=1&itool=EntrezSystem2.PEntrez.Gene.Gene_ResultsPanel.Gene_RVDocSum	CNTN6	CNTN6	256	http://www.ncbi.nlm.nih.gov/sites/entrez?Db=gene&Cmd=ShowDetailView&TermToSearch=10752&ordinalpos=1&itool=EntrezSystem2.PEntrez.Gene.Gene_ResultsPanel.Gene_RVDocSum	CHL1	CHL1	427	2.7	-0.2	1.3	1.3	0.16	0.0014	0.0011	-0.6	-0.4	0.5	-0.3	0.47	0.017	0.74
http://www.ensembl.org/Homo_sapiens/Variation/Summary?v=rs17486713	rs17486713	rs17486713	3	0.97	0.03	0	0	0.00011	0.65	0.1	0.01	G	T	0.4	http://www.ncbi.nlm.nih.gov/sites/entrez?Db=gene&Cmd=ShowDetailView&TermToSearch=402123&ordinalpos=1&itool=EntrezSystem2.PEntrez.Gene.Gene_ResultsPanel.Gene_RVDocSum	LOC402123	LOC402123	221	http://www.ncbi.nlm.nih.gov/sites/entrez?Db=gene&Cmd=ShowDetailView&TermToSearch=27255&ordinalpos=1&itool=EntrezSystem2.PEntrez.Gene.Gene_ResultsPanel.Gene_RVDocSum	CNTN6	CNTN6	254	http://www.ncbi.nlm.nih.gov/sites/entrez?Db=gene&Cmd=ShowDetailView&TermToSearch=10752&ordinalpos=1&itool=EntrezSystem2.PEntrez.Gene.Gene_ResultsPanel.Gene_RVDocSum	CHL1	CHL1	429	2.5	-0.4	2.1	0.8	0.48	0.00015	0.013	-0.6	-0.3	-0.1	-0.3	0.33	0.18	0.55
http://www.ensembl.org/Homo_sapiens/Variation/Summary?v=rs4684585	rs4684585	rs4684585	3	0.52	0.45	0	0.03	8.9e-07	0.6	-0.23	-0.02	G	A	0.43	http://www.ncbi.nlm.nih.gov/sites/entrez?Db=gene&Cmd=ShowDetailView&TermToSearch=402123&ordinalpos=1&itool=EntrezSystem2.PEntrez.Gene.Gene_ResultsPanel.Gene_RVDocSum	LOC402123	LOC402123	224	http://www.ncbi.nlm.nih.gov/sites/entrez?Db=gene&Cmd=ShowDetailView&TermToSearch=27255&ordinalpos=1&itool=EntrezSystem2.PEntrez.Gene.Gene_ResultsPanel.Gene_RVDocSum	CNTN6	CNTN6	251	http://www.ncbi.nlm.nih.gov/sites/entrez?Db=gene&Cmd=ShowDetailView&TermToSearch=10752&ordinalpos=1&itool=EntrezSystem2.PEntrez.Gene.Gene_ResultsPanel.Gene_RVDocSum	CHL1	CHL1	433	4	NA	2.4	0.9	NA	6.1e-05	0.0043	-0.2	NA	-0.1	-0.2	NA	0.99	0.37
http://www.ensembl.org/Homo_sapiens/Variation/Summary?v=rs6764632	rs6764632	rs6764632	3	0.95	0.04	0	0	3.5e-05	0.25	-0.13	-0.04	T	C	0.22	http://www.ncbi.nlm.nih.gov/sites/entrez?Db=gene&Cmd=ShowDetailView&TermToSearch=402123&ordinalpos=1&itool=EntrezSystem2.PEntrez.Gene.Gene_ResultsPanel.Gene_RVDocSum	LOC402123	LOC402123	227	http://www.ncbi.nlm.nih.gov/sites/entrez?Db=gene&Cmd=ShowDetailView&TermToSearch=27255&ordinalpos=1&itool=EntrezSystem2.PEntrez.Gene.Gene_ResultsPanel.Gene_RVDocSum	CNTN6	CNTN6	248	http://www.ncbi.nlm.nih.gov/sites/entrez?Db=gene&Cmd=ShowDetailView&TermToSearch=10752&ordinalpos=1&itool=EntrezSystem2.PEntrez.Gene.Gene_ResultsPanel.Gene_RVDocSum	CHL1	CHL1	436	2.7	-0.1	1.3	1.2	0.16	0.0016	0.0015	-0.4	-0.4	0.6	-0.3	0.72	0.014	0.83
http://www.ensembl.org/Homo_sapiens/Variation/Summary?v=rs4686247	rs4686247	rs4686247	3	0.71	0.28	0	0.02	2.3e-06	0.78	-0.22	-0.01	A	C	0.43	http://www.ncbi.nlm.nih.gov/sites/entrez?Db=gene&Cmd=ShowDetailView&TermToSearch=402123&ordinalpos=1&itool=EntrezSystem2.PEntrez.Gene.Gene_ResultsPanel.Gene_RVDocSum	LOC402123	LOC402123	233	http://www.ncbi.nlm.nih.gov/sites/entrez?Db=gene&Cmd=ShowDetailView&TermToSearch=27255&ordinalpos=1&itool=EntrezSystem2.PEntrez.Gene.Gene_ResultsPanel.Gene_RVDocSum	CNTN6	CNTN6	242	http://www.ncbi.nlm.nih.gov/sites/entrez?Db=gene&Cmd=ShowDetailView&TermToSearch=10752&ordinalpos=1&itool=EntrezSystem2.PEntrez.Gene.Gene_ResultsPanel.Gene_RVDocSum	CHL1	CHL1	442	3.6	NA	2	1.1	NA	0.00024	0.0026	-0.2	NA	-0.1	-0.2	NA	0.87	0.47
http://www.ensembl.org/Homo_sapiens/Variation/Summary?v=rs7619975	rs7619975	rs7619975	3	0.98	0.02	0	0	7.2e-05	0.36	-0.12	-0.03	T	C	0.25	http://www.ncbi.nlm.nih.gov/sites/entrez?Db=gene&Cmd=ShowDetailView&TermToSearch=402123&ordinalpos=1&itool=EntrezSystem2.PEntrez.Gene.Gene_ResultsPanel.Gene_RVDocSum	LOC402123	LOC402123	235	http://www.ncbi.nlm.nih.gov/sites/entrez?Db=gene&Cmd=ShowDetailView&TermToSearch=27255&ordinalpos=1&itool=EntrezSystem2.PEntrez.Gene.Gene_ResultsPanel.Gene_RVDocSum	CNTN6	CNTN6	240	http://www.ncbi.nlm.nih.gov/sites/entrez?Db=gene&Cmd=ShowDetailView&TermToSearch=10752&ordinalpos=1&itool=EntrezSystem2.PEntrez.Gene.Gene_ResultsPanel.Gene_RVDocSum	CHL1	CHL1	444	2.4	-0.3	1.5	1.1	0.26	0.00094	0.0027	-0.4	-0.4	0.6	-0.3	0.59	0.016	0.7
http://www.ensembl.org/Homo_sapiens/Variation/Summary?v=rs35964523	rs35964523	rs35964523	3	0.74	0.25	0	0.01	2.4e-06	0.88	-0.24	-0.01	T	C	0.42	http://www.ncbi.nlm.nih.gov/sites/entrez?Db=gene&Cmd=ShowDetailView&TermToSearch=27255&ordinalpos=1&itool=EntrezSystem2.PEntrez.Gene.Gene_ResultsPanel.Gene_RVDocSum	CNTN6	CNTN6	236	http://www.ncbi.nlm.nih.gov/sites/entrez?Db=gene&Cmd=ShowDetailView&TermToSearch=402123&ordinalpos=1&itool=EntrezSystem2.PEntrez.Gene.Gene_ResultsPanel.Gene_RVDocSum	LOC402123	LOC402123	239	http://www.ncbi.nlm.nih.gov/sites/entrez?Db=gene&Cmd=ShowDetailView&TermToSearch=10752&ordinalpos=1&itool=EntrezSystem2.PEntrez.Gene.Gene_ResultsPanel.Gene_RVDocSum	CHL1	CHL1	448	3.6	NA	1.7	1.3	NA	0.00044	0.0013	-0.3	NA	-0.2	-0.2	NA	0.74	0.46
http://www.ensembl.org/Homo_sapiens/Variation/Summary?v=rs13089828	rs13089828	rs13089828	3	0.99	0	0	0.01	0.47	6.7e-06	0.02	-0.14	C	A	0.2	http://www.ncbi.nlm.nih.gov/sites/entrez?Db=gene&Cmd=ShowDetailView&TermToSearch=51185&ordinalpos=1&itool=EntrezSystem2.PEntrez.Gene.Gene_ResultsPanel.Gene_RVDocSum	CRBN	CRBN	205	http://www.ncbi.nlm.nih.gov/sites/entrez?Db=gene&Cmd=ShowDetailView&TermToSearch=51095&ordinalpos=1&itool=EntrezSystem2.PEntrez.Gene.Gene_ResultsPanel.Gene_RVDocSum	TRNT1	TRNT1	234	http://www.ncbi.nlm.nih.gov/sites/entrez?Db=gene&Cmd=ShowDetailView&TermToSearch=3568&ordinalpos=1&itool=EntrezSystem2.PEntrez.Gene.Gene_ResultsPanel.Gene_RVDocSum	IL5RA	IL5RA	275	-0.5	-0.2	-0.4	-0.2	0.21	0.97	0.62	3.5	-0.1	2.8	0.9	0.11	2.2e-05	0.0077
http://www.ensembl.org/Homo_sapiens/Variation/Summary?v=rs9876606	rs9876606	rs9876606	3	0.99	0	0	0.01	0.43	8.9e-06	0.02	-0.13	G	T	0.18	http://www.ncbi.nlm.nih.gov/sites/entrez?Db=gene&Cmd=ShowDetailView&TermToSearch=51185&ordinalpos=1&itool=EntrezSystem2.PEntrez.Gene.Gene_ResultsPanel.Gene_RVDocSum	CRBN	CRBN	210	http://www.ncbi.nlm.nih.gov/sites/entrez?Db=gene&Cmd=ShowDetailView&TermToSearch=51095&ordinalpos=1&itool=EntrezSystem2.PEntrez.Gene.Gene_ResultsPanel.Gene_RVDocSum	TRNT1	TRNT1	239	http://www.ncbi.nlm.nih.gov/sites/entrez?Db=gene&Cmd=ShowDetailView&TermToSearch=3568&ordinalpos=1&itool=EntrezSystem2.PEntrez.Gene.Gene_ResultsPanel.Gene_RVDocSum	IL5RA	IL5RA	280	-0.5	-0.2	-0.4	-0.2	0.18	0.96	0.66	3.6	-0.1	2.5	0.9	0.15	5.1e-05	0.0091
http://www.ensembl.org/Homo_sapiens/Variation/Summary?v=rs7633531	rs7633531	rs7633531	3	0.13	0.84	0	0.03	1.3e-07	0.37	0.16	0.03	T	G	0.18	http://www.ncbi.nlm.nih.gov/sites/entrez?Db=gene&Cmd=ShowDetailView&TermToSearch=285322&ordinalpos=1&itool=EntrezSystem2.PEntrez.Gene.Gene_ResultsPanel.Gene_RVDocSum	C3orf53	C3orf53	211	http://www.ncbi.nlm.nih.gov/sites/entrez?Db=gene&Cmd=ShowDetailView&TermToSearch=152098&ordinalpos=1&itool=EntrezSystem2.PEntrez.Gene.Gene_ResultsPanel.Gene_RVDocSum	ZCWPW2	ZCWPW2	262	http://www.ncbi.nlm.nih.gov/sites/entrez?Db=gene&Cmd=ShowDetailView&TermToSearch=131572&ordinalpos=1&itool=EntrezSystem2.PEntrez.Gene.Gene_ResultsPanel.Gene_RVDocSum	LOC131572	LOC131572	300	4.8	4.2	-0.1	0.5	5.4e-07	0.2	0.016	-0.5	-0.5	-0.1	-0.2	0.94	0.18	0.65
http://www.ensembl.org/Homo_sapiens/Variation/Summary?v=rs4680784	rs4680784	rs4680784	3	0.16	0.82	0	0.03	1.6e-07	0.42	0.17	0.03	A	G	0.17	http://www.ncbi.nlm.nih.gov/sites/entrez?Db=gene&Cmd=ShowDetailView&TermToSearch=285322&ordinalpos=1&itool=EntrezSystem2.PEntrez.Gene.Gene_ResultsPanel.Gene_RVDocSum	C3orf53	C3orf53	214	http://www.ncbi.nlm.nih.gov/sites/entrez?Db=gene&Cmd=ShowDetailView&TermToSearch=152098&ordinalpos=1&itool=EntrezSystem2.PEntrez.Gene.Gene_ResultsPanel.Gene_RVDocSum	ZCWPW2	ZCWPW2	265	http://www.ncbi.nlm.nih.gov/sites/entrez?Db=gene&Cmd=ShowDetailView&TermToSearch=131572&ordinalpos=1&itool=EntrezSystem2.PEntrez.Gene.Gene_ResultsPanel.Gene_RVDocSum	LOC131572	LOC131572	297	4.8	4.2	-0.1	0.6	5.9e-07	0.19	0.014	-0.5	-0.4	-0.1	-0.2	0.81	0.19	0.64
http://www.ensembl.org/Homo_sapiens/Variation/Summary?v=rs3902030	rs3902030	rs3902030	3	0.93	0.06	0	0	2.1e-05	0.53	0.14	0.02	A	G	0.21	http://www.ncbi.nlm.nih.gov/sites/entrez?Db=gene&Cmd=ShowDetailView&TermToSearch=285322&ordinalpos=1&itool=EntrezSystem2.PEntrez.Gene.Gene_ResultsPanel.Gene_RVDocSum	C3orf53	C3orf53	223	http://www.ncbi.nlm.nih.gov/sites/entrez?Db=gene&Cmd=ShowDetailView&TermToSearch=152098&ordinalpos=1&itool=EntrezSystem2.PEntrez.Gene.Gene_ResultsPanel.Gene_RVDocSum	ZCWPW2	ZCWPW2	274	http://www.ncbi.nlm.nih.gov/sites/entrez?Db=gene&Cmd=ShowDetailView&TermToSearch=131572&ordinalpos=1&itool=EntrezSystem2.PEntrez.Gene.Gene_ResultsPanel.Gene_RVDocSum	LOC131572	LOC131572	288	2.9	2.9	-0.1	-0.1	1.6e-05	0.2	0.22	-0.5	-0.5	-0.3	-0.2	0.93	0.49	0.47
http://www.ensembl.org/Homo_sapiens/Variation/Summary?v=rs7631590	rs7631590	rs7631590	3	0.93	0.07	0	0	2.2e-05	0.51	0.12	0.02	G	A	0.18	http://www.ncbi.nlm.nih.gov/sites/entrez?Db=gene&Cmd=ShowDetailView&TermToSearch=285322&ordinalpos=1&itool=EntrezSystem2.PEntrez.Gene.Gene_ResultsPanel.Gene_RVDocSum	C3orf53	C3orf53	228	http://www.ncbi.nlm.nih.gov/sites/entrez?Db=gene&Cmd=ShowDetailView&TermToSearch=152098&ordinalpos=1&itool=EntrezSystem2.PEntrez.Gene.Gene_ResultsPanel.Gene_RVDocSum	ZCWPW2	ZCWPW2	279	http://www.ncbi.nlm.nih.gov/sites/entrez?Db=gene&Cmd=ShowDetailView&TermToSearch=131572&ordinalpos=1&itool=EntrezSystem2.PEntrez.Gene.Gene_ResultsPanel.Gene_RVDocSum	LOC131572	LOC131572	283	2.9	2.6	0	-0.2	4.4e-05	0.088	0.38	-0.6	-0.5	-0.4	-0.1	0.95	0.73	0.29
http://www.ensembl.org/Homo_sapiens/Variation/Summary?v=rs1392311	rs1392311	rs1392311	3	0.93	0.07	0	0	2.2e-05	0.49	0.13	0.02	T	C	0.18	http://www.ncbi.nlm.nih.gov/sites/entrez?Db=gene&Cmd=ShowDetailView&TermToSearch=285322&ordinalpos=1&itool=EntrezSystem2.PEntrez.Gene.Gene_ResultsPanel.Gene_RVDocSum	C3orf53	C3orf53	229	http://www.ncbi.nlm.nih.gov/sites/entrez?Db=gene&Cmd=ShowDetailView&TermToSearch=152098&ordinalpos=1&itool=EntrezSystem2.PEntrez.Gene.Gene_ResultsPanel.Gene_RVDocSum	ZCWPW2	ZCWPW2	280	http://www.ncbi.nlm.nih.gov/sites/entrez?Db=gene&Cmd=ShowDetailView&TermToSearch=131572&ordinalpos=1&itool=EntrezSystem2.PEntrez.Gene.Gene_ResultsPanel.Gene_RVDocSum	LOC131572	LOC131572	282	2.9	2.8	0	-0.2	2.1e-05	0.12	0.39	-0.5	-0.5	-0.4	-0.1	0.94	0.68	0.31
http://www.ensembl.org/Homo_sapiens/Variation/Summary?v=rs6768567	rs6768567	rs6768567	3	0.93	0.06	0	0	2.3e-05	0.48	0.13	0.02	A	G	0.18	http://www.ncbi.nlm.nih.gov/sites/entrez?Db=gene&Cmd=ShowDetailView&TermToSearch=285322&ordinalpos=1&itool=EntrezSystem2.PEntrez.Gene.Gene_ResultsPanel.Gene_RVDocSum	C3orf53	C3orf53	229	http://www.ncbi.nlm.nih.gov/sites/entrez?Db=gene&Cmd=ShowDetailView&TermToSearch=152098&ordinalpos=1&itool=EntrezSystem2.PEntrez.Gene.Gene_ResultsPanel.Gene_RVDocSum	ZCWPW2	ZCWPW2	281	http://www.ncbi.nlm.nih.gov/sites/entrez?Db=gene&Cmd=ShowDetailView&TermToSearch=131572&ordinalpos=1&itool=EntrezSystem2.PEntrez.Gene.Gene_ResultsPanel.Gene_RVDocSum	LOC131572	LOC131572	281	2.9	2.8	0	-0.2	2.2e-05	0.13	0.39	-0.5	-0.5	-0.4	-0.1	0.94	0.67	0.31
http://www.ensembl.org/Homo_sapiens/Variation/Summary?v=rs9883412	rs9883412	rs9883412	3	0.94	0.06	0	0	2.3e-05	0.78	0.13	0.01	G	A	0.21	http://www.ncbi.nlm.nih.gov/sites/entrez?Db=gene&Cmd=ShowDetailView&TermToSearch=285322&ordinalpos=1&itool=EntrezSystem2.PEntrez.Gene.Gene_ResultsPanel.Gene_RVDocSum	C3orf53	C3orf53	245	http://www.ncbi.nlm.nih.gov/sites/entrez?Db=gene&Cmd=ShowDetailView&TermToSearch=131572&ordinalpos=1&itool=EntrezSystem2.PEntrez.Gene.Gene_ResultsPanel.Gene_RVDocSum	LOC131572	LOC131572	266	http://www.ncbi.nlm.nih.gov/sites/entrez?Db=gene&Cmd=ShowDetailView&TermToSearch=152098&ordinalpos=1&itool=EntrezSystem2.PEntrez.Gene.Gene_ResultsPanel.Gene_RVDocSum	ZCWPW2	ZCWPW2	296	2.9	4.1	-0.3	0	8e-07	0.49	0.19	-0.5	-0.2	-0.1	-0.2	0.25	0.18	0.64
http://www.ensembl.org/Homo_sapiens/Variation/Summary?v=rs12054125	rs12054125	rs12054125	3	0.99	0.01	0	0	0.0002	0.75	0.12	0.01	G	A	0.18	http://www.ncbi.nlm.nih.gov/sites/entrez?Db=gene&Cmd=ShowDetailView&TermToSearch=285322&ordinalpos=1&itool=EntrezSystem2.PEntrez.Gene.Gene_ResultsPanel.Gene_RVDocSum	C3orf53	C3orf53	252	http://www.ncbi.nlm.nih.gov/sites/entrez?Db=gene&Cmd=ShowDetailView&TermToSearch=131572&ordinalpos=1&itool=EntrezSystem2.PEntrez.Gene.Gene_ResultsPanel.Gene_RVDocSum	LOC131572	LOC131572	259	http://www.ncbi.nlm.nih.gov/sites/entrez?Db=gene&Cmd=ShowDetailView&TermToSearch=152098&ordinalpos=1&itool=EntrezSystem2.PEntrez.Gene.Gene_ResultsPanel.Gene_RVDocSum	ZCWPW2	ZCWPW2	303	2.1	3.1	-0.4	-0.1	1.2e-05	0.74	0.31	-0.6	-0.3	-0.1	-0.2	0.38	0.16	0.71
http://www.ensembl.org/Homo_sapiens/Variation/Summary?v=rs12054127	rs12054127	rs12054127	3	0.99	0.01	0	0	0.00019	0.78	0.12	0.01	G	A	0.18	http://www.ncbi.nlm.nih.gov/sites/entrez?Db=gene&Cmd=ShowDetailView&TermToSearch=285322&ordinalpos=1&itool=EntrezSystem2.PEntrez.Gene.Gene_ResultsPanel.Gene_RVDocSum	C3orf53	C3orf53	252	http://www.ncbi.nlm.nih.gov/sites/entrez?Db=gene&Cmd=ShowDetailView&TermToSearch=131572&ordinalpos=1&itool=EntrezSystem2.PEntrez.Gene.Gene_ResultsPanel.Gene_RVDocSum	LOC131572	LOC131572	259	http://www.ncbi.nlm.nih.gov/sites/entrez?Db=gene&Cmd=ShowDetailView&TermToSearch=152098&ordinalpos=1&itool=EntrezSystem2.PEntrez.Gene.Gene_ResultsPanel.Gene_RVDocSum	ZCWPW2	ZCWPW2	303	2.1	3.1	-0.4	-0.1	1.2e-05	0.72	0.32	-0.6	-0.3	-0.1	-0.2	0.38	0.18	0.72
http://www.ensembl.org/Homo_sapiens/Variation/Summary?v=rs12054244	rs12054244	rs12054244	3	0.99	0.01	0	0	0.00018	0.75	0.12	0.01	T	C	0.18	http://www.ncbi.nlm.nih.gov/sites/entrez?Db=gene&Cmd=ShowDetailView&TermToSearch=285322&ordinalpos=1&itool=EntrezSystem2.PEntrez.Gene.Gene_ResultsPanel.Gene_RVDocSum	C3orf53	C3orf53	252	http://www.ncbi.nlm.nih.gov/sites/entrez?Db=gene&Cmd=ShowDetailView&TermToSearch=131572&ordinalpos=1&itool=EntrezSystem2.PEntrez.Gene.Gene_ResultsPanel.Gene_RVDocSum	LOC131572	LOC131572	259	http://www.ncbi.nlm.nih.gov/sites/entrez?Db=gene&Cmd=ShowDetailView&TermToSearch=152098&ordinalpos=1&itool=EntrezSystem2.PEntrez.Gene.Gene_ResultsPanel.Gene_RVDocSum	ZCWPW2	ZCWPW2	304	2.1	3.2	-0.4	-0.1	1.1e-05	0.73	0.32	-0.6	-0.4	-0.1	-0.2	0.39	0.17	0.69
http://www.ensembl.org/Homo_sapiens/Variation/Summary?v=rs12488415	rs12488415	rs12488415	3	0.99	0.01	0	0	0.0002	0.78	0.12	0.01	C	A	0.18	http://www.ncbi.nlm.nih.gov/sites/entrez?Db=gene&Cmd=ShowDetailView&TermToSearch=285322&ordinalpos=1&itool=EntrezSystem2.PEntrez.Gene.Gene_ResultsPanel.Gene_RVDocSum	C3orf53	C3orf53	253	http://www.ncbi.nlm.nih.gov/sites/entrez?Db=gene&Cmd=ShowDetailView&TermToSearch=131572&ordinalpos=1&itool=EntrezSystem2.PEntrez.Gene.Gene_ResultsPanel.Gene_RVDocSum	LOC131572	LOC131572	258	http://www.ncbi.nlm.nih.gov/sites/entrez?Db=gene&Cmd=ShowDetailView&TermToSearch=152098&ordinalpos=1&itool=EntrezSystem2.PEntrez.Gene.Gene_ResultsPanel.Gene_RVDocSum	ZCWPW2	ZCWPW2	304	2.1	3.2	-0.4	-0.1	1.2e-05	0.76	0.32	-0.6	-0.4	-0.1	-0.2	0.39	0.18	0.74
http://www.ensembl.org/Homo_sapiens/Variation/Summary?v=rs12490883	rs12490883	rs12490883	3	0.98	0.02	0	0	8.6e-05	0.77	0.12	0.01	C	T	0.18	http://www.ncbi.nlm.nih.gov/sites/entrez?Db=gene&Cmd=ShowDetailView&TermToSearch=131572&ordinalpos=1&itool=EntrezSystem2.PEntrez.Gene.Gene_ResultsPanel.Gene_RVDocSum	LOC131572	LOC131572	252	http://www.ncbi.nlm.nih.gov/sites/entrez?Db=gene&Cmd=ShowDetailView&TermToSearch=285322&ordinalpos=1&itool=EntrezSystem2.PEntrez.Gene.Gene_ResultsPanel.Gene_RVDocSum	C3orf53	C3orf53	259	http://www.ncbi.nlm.nih.gov/sites/entrez?Db=gene&Cmd=ShowDetailView&TermToSearch=152098&ordinalpos=1&itool=EntrezSystem2.PEntrez.Gene.Gene_ResultsPanel.Gene_RVDocSum	ZCWPW2	ZCWPW2	310	2.4	3.4	-0.4	-0.1	5.2e-06	0.75	0.31	-0.6	-0.4	-0.1	-0.2	0.39	0.16	0.68
http://www.ensembl.org/Homo_sapiens/Variation/Summary?v=rs804418	rs804418	rs804418	3	0.99	0.01	0	0	0.00027	0.79	0.09	-0.01	T	C	0.31	http://www.ncbi.nlm.nih.gov/sites/entrez?Db=gene&Cmd=ShowDetailView&TermToSearch=5793&ordinalpos=1&itool=EntrezSystem2.PEntrez.Gene.Gene_ResultsPanel.Gene_RVDocSum	PTPRG	PTPRG	0	http://www.ncbi.nlm.nih.gov/sites/entrez?Db=gene&Cmd=ShowDetailView&TermToSearch=84099&ordinalpos=1&itool=EntrezSystem2.PEntrez.Gene.Gene_ResultsPanel.Gene_RVDocSum	ID2B	ID2B	125	http://www.ncbi.nlm.nih.gov/sites/entrez?Db=gene&Cmd=ShowDetailView&TermToSearch=57415&ordinalpos=1&itool=EntrezSystem2.PEntrez.Gene.Gene_ResultsPanel.Gene_RVDocSum	C3orf14	C3orf14	322	2.1	2	-0.2	0.3	0.00025	0.77	0.043	-0.7	-0.1	0	-0.3	0.15	0.12	0.85
http://www.ensembl.org/Homo_sapiens/Variation/Summary?v=rs804417	rs804417	rs804417	3	0.99	0.01	0	0	0.00027	0.66	0.09	-0.01	A	T	0.31	http://www.ncbi.nlm.nih.gov/sites/entrez?Db=gene&Cmd=ShowDetailView&TermToSearch=5793&ordinalpos=1&itool=EntrezSystem2.PEntrez.Gene.Gene_ResultsPanel.Gene_RVDocSum	PTPRG	PTPRG	0	http://www.ncbi.nlm.nih.gov/sites/entrez?Db=gene&Cmd=ShowDetailView&TermToSearch=84099&ordinalpos=1&itool=EntrezSystem2.PEntrez.Gene.Gene_ResultsPanel.Gene_RVDocSum	ID2B	ID2B	125	http://www.ncbi.nlm.nih.gov/sites/entrez?Db=gene&Cmd=ShowDetailView&TermToSearch=57415&ordinalpos=1&itool=EntrezSystem2.PEntrez.Gene.Gene_ResultsPanel.Gene_RVDocSum	C3orf14	C3orf14	321	2.1	2	-0.2	0.2	0.0002	0.77	0.059	-0.7	0	0	-0.3	0.1	0.13	0.87
http://www.ensembl.org/Homo_sapiens/Variation/Summary?v=rs9858444	rs9858444	rs9858444	3	0.99	0.01	0	0	7e-05	0.96	-0.43	0	C	T	0.04	http://www.ncbi.nlm.nih.gov/sites/entrez?Db=gene&Cmd=ShowDetailView&TermToSearch=27086&ordinalpos=1&itool=EntrezSystem2.PEntrez.Gene.Gene_ResultsPanel.Gene_RVDocSum	FOXP1	FOXP1	0	http://www.ncbi.nlm.nih.gov/sites/entrez?Db=gene&Cmd=ShowDetailView&TermToSearch=401072&ordinalpos=1&itool=EntrezSystem2.PEntrez.Gene.Gene_ResultsPanel.Gene_RVDocSum	LOC401072	LOC401072	410	http://www.ncbi.nlm.nih.gov/sites/entrez?Db=gene&Cmd=ShowDetailView&TermToSearch=317649&ordinalpos=1&itool=EntrezSystem2.PEntrez.Gene.Gene_ResultsPanel.Gene_RVDocSum	EIF4E3	EIF4E3	655	2.1	0.7	0.2	0.2	0.0031	0.043	0.042	-0.2	-0.1	0.1	0.2	0.99	0.12	0.065
http://www.ensembl.org/Homo_sapiens/Variation/Summary?v=rs7653129	rs7653129	rs7653129	3	0.99	0.01	0	0	6.2e-05	0.92	-0.41	-0.01	G	A	0.04	http://www.ncbi.nlm.nih.gov/sites/entrez?Db=gene&Cmd=ShowDetailView&TermToSearch=27086&ordinalpos=1&itool=EntrezSystem2.PEntrez.Gene.Gene_ResultsPanel.Gene_RVDocSum	FOXP1	FOXP1	0	http://www.ncbi.nlm.nih.gov/sites/entrez?Db=gene&Cmd=ShowDetailView&TermToSearch=401072&ordinalpos=1&itool=EntrezSystem2.PEntrez.Gene.Gene_ResultsPanel.Gene_RVDocSum	LOC401072	LOC401072	413	http://www.ncbi.nlm.nih.gov/sites/entrez?Db=gene&Cmd=ShowDetailView&TermToSearch=317649&ordinalpos=1&itool=EntrezSystem2.PEntrez.Gene.Gene_ResultsPanel.Gene_RVDocSum	EIF4E3	EIF4E3	652	2.2	0.7	0.3	0.2	0.0028	0.035	0.045	-0.2	-0.1	0.1	0.1	0.99	0.13	0.083
http://www.ensembl.org/Homo_sapiens/Variation/Summary?v=rs6549371	rs6549371	rs6549371	3	0.99	0.01	0	0	6.5e-05	0.94	-0.41	-0.01	C	G	0.04	http://www.ncbi.nlm.nih.gov/sites/entrez?Db=gene&Cmd=ShowDetailView&TermToSearch=27086&ordinalpos=1&itool=EntrezSystem2.PEntrez.Gene.Gene_ResultsPanel.Gene_RVDocSum	FOXP1	FOXP1	0	http://www.ncbi.nlm.nih.gov/sites/entrez?Db=gene&Cmd=ShowDetailView&TermToSearch=401072&ordinalpos=1&itool=EntrezSystem2.PEntrez.Gene.Gene_ResultsPanel.Gene_RVDocSum	LOC401072	LOC401072	414	http://www.ncbi.nlm.nih.gov/sites/entrez?Db=gene&Cmd=ShowDetailView&TermToSearch=317649&ordinalpos=1&itool=EntrezSystem2.PEntrez.Gene.Gene_ResultsPanel.Gene_RVDocSum	EIF4E3	EIF4E3	651	2.1	0.7	0.3	0.2	0.0028	0.036	0.044	-0.2	-0.1	0.1	0.1	1	0.14	0.083
http://www.ensembl.org/Homo_sapiens/Variation/Summary?v=rs9861326	rs9861326	rs9861326	3	0.99	0.01	0	0	6.7e-05	0.99	-0.42	0	A	C	0.04	http://www.ncbi.nlm.nih.gov/sites/entrez?Db=gene&Cmd=ShowDetailView&TermToSearch=27086&ordinalpos=1&itool=EntrezSystem2.PEntrez.Gene.Gene_ResultsPanel.Gene_RVDocSum	FOXP1	FOXP1	0	http://www.ncbi.nlm.nih.gov/sites/entrez?Db=gene&Cmd=ShowDetailView&TermToSearch=401072&ordinalpos=1&itool=EntrezSystem2.PEntrez.Gene.Gene_ResultsPanel.Gene_RVDocSum	LOC401072	LOC401072	415	http://www.ncbi.nlm.nih.gov/sites/entrez?Db=gene&Cmd=ShowDetailView&TermToSearch=317649&ordinalpos=1&itool=EntrezSystem2.PEntrez.Gene.Gene_ResultsPanel.Gene_RVDocSum	EIF4E3	EIF4E3	650	2.1	0.7	0.3	0.2	0.0029	0.038	0.041	-0.2	-0.1	0	0.1	0.98	0.16	0.086
http://www.ensembl.org/Homo_sapiens/Variation/Summary?v=rs9880715	rs9880715	rs9880715	3	0.99	0.01	0	0	6.4e-05	1	-0.43	0	G	A	0.04	http://www.ncbi.nlm.nih.gov/sites/entrez?Db=gene&Cmd=ShowDetailView&TermToSearch=27086&ordinalpos=1&itool=EntrezSystem2.PEntrez.Gene.Gene_ResultsPanel.Gene_RVDocSum	FOXP1	FOXP1	0	http://www.ncbi.nlm.nih.gov/sites/entrez?Db=gene&Cmd=ShowDetailView&TermToSearch=401072&ordinalpos=1&itool=EntrezSystem2.PEntrez.Gene.Gene_ResultsPanel.Gene_RVDocSum	LOC401072	LOC401072	415	http://www.ncbi.nlm.nih.gov/sites/entrez?Db=gene&Cmd=ShowDetailView&TermToSearch=317649&ordinalpos=1&itool=EntrezSystem2.PEntrez.Gene.Gene_ResultsPanel.Gene_RVDocSum	EIF4E3	EIF4E3	650	2.1	0.7	0.3	0.2	0.0028	0.038	0.04	-0.2	-0.1	0	0.1	0.98	0.17	0.087
http://www.ensembl.org/Homo_sapiens/Variation/Summary?v=rs1288979	rs1288979	rs1288979	3	0.99	0.01	0	0	5.9e-05	0.94	-0.45	0.01	C	T	0.03	http://www.ncbi.nlm.nih.gov/sites/entrez?Db=gene&Cmd=ShowDetailView&TermToSearch=27086&ordinalpos=1&itool=EntrezSystem2.PEntrez.Gene.Gene_ResultsPanel.Gene_RVDocSum	FOXP1	FOXP1	0	http://www.ncbi.nlm.nih.gov/sites/entrez?Db=gene&Cmd=ShowDetailView&TermToSearch=401072&ordinalpos=1&itool=EntrezSystem2.PEntrez.Gene.Gene_ResultsPanel.Gene_RVDocSum	LOC401072	LOC401072	436	http://www.ncbi.nlm.nih.gov/sites/entrez?Db=gene&Cmd=ShowDetailView&TermToSearch=317649&ordinalpos=1&itool=EntrezSystem2.PEntrez.Gene.Gene_ResultsPanel.Gene_RVDocSum	EIF4E3	EIF4E3	629	2.1	0.6	0.3	0.2	0.003	0.036	0.038	-0.2	-0.1	0	0.1	0.95	0.19	0.091
http://www.ensembl.org/Homo_sapiens/Variation/Summary?v=rs1288980	rs1288980	rs1288980	3	0.99	0.01	0	0	5.9e-05	0.96	-0.45	0.01	G	A	0.03	http://www.ncbi.nlm.nih.gov/sites/entrez?Db=gene&Cmd=ShowDetailView&TermToSearch=27086&ordinalpos=1&itool=EntrezSystem2.PEntrez.Gene.Gene_ResultsPanel.Gene_RVDocSum	FOXP1	FOXP1	0	http://www.ncbi.nlm.nih.gov/sites/entrez?Db=gene&Cmd=ShowDetailView&TermToSearch=401072&ordinalpos=1&itool=EntrezSystem2.PEntrez.Gene.Gene_ResultsPanel.Gene_RVDocSum	LOC401072	LOC401072	439	http://www.ncbi.nlm.nih.gov/sites/entrez?Db=gene&Cmd=ShowDetailView&TermToSearch=317649&ordinalpos=1&itool=EntrezSystem2.PEntrez.Gene.Gene_ResultsPanel.Gene_RVDocSum	EIF4E3	EIF4E3	626	2.1	0.6	0.3	0.2	0.003	0.035	0.039	-0.2	-0.1	0	0.1	0.96	0.19	0.092
http://www.ensembl.org/Homo_sapiens/Variation/Summary?v=rs513154	rs513154	rs513154	3	0.99	0.01	0	0	0.00023	0.55	0.09	0.01	T	G	0.36	http://www.ncbi.nlm.nih.gov/sites/entrez?Db=gene&Cmd=ShowDetailView&TermToSearch=50939&ordinalpos=1&itool=EntrezSystem2.PEntrez.Gene.Gene_ResultsPanel.Gene_RVDocSum	IMPG2	IMPG2	0	http://www.ncbi.nlm.nih.gov/sites/entrez?Db=gene&Cmd=ShowDetailView&TermToSearch=57337&ordinalpos=1&itool=EntrezSystem2.PEntrez.Gene.Gene_ResultsPanel.Gene_RVDocSum	SENP7	SENP7	90	http://www.ncbi.nlm.nih.gov/sites/entrez?Db=gene&Cmd=ShowDetailView&TermToSearch=643412&ordinalpos=1&itool=EntrezSystem2.PEntrez.Gene.Gene_ResultsPanel.Gene_RVDocSum	LOC643412	LOC643412	222	2.1	-0.3	2	0.4	0.32	0.00026	0.03	-0.7	-0.4	-0.5	-0.3	0.38	0.81	0.77
http://www.ensembl.org/Homo_sapiens/Variation/Summary?v=rs571391	rs571391	rs571391	3	0.99	0.01	0	0	0.00022	0.66	0.09	0.01	G	A	0.36	http://www.ncbi.nlm.nih.gov/sites/entrez?Db=gene&Cmd=ShowDetailView&TermToSearch=50939&ordinalpos=1&itool=EntrezSystem2.PEntrez.Gene.Gene_ResultsPanel.Gene_RVDocSum	IMPG2	IMPG2	0	http://www.ncbi.nlm.nih.gov/sites/entrez?Db=gene&Cmd=ShowDetailView&TermToSearch=57337&ordinalpos=1&itool=EntrezSystem2.PEntrez.Gene.Gene_ResultsPanel.Gene_RVDocSum	SENP7	SENP7	80	http://www.ncbi.nlm.nih.gov/sites/entrez?Db=gene&Cmd=ShowDetailView&TermToSearch=643412&ordinalpos=1&itool=EntrezSystem2.PEntrez.Gene.Gene_ResultsPanel.Gene_RVDocSum	LOC643412	LOC643412	212	2.2	-0.2	2.1	0.4	0.32	0.00018	0.032	-0.7	-0.5	-0.5	-0.3	0.4	0.66	0.82
http://www.ensembl.org/Homo_sapiens/Variation/Summary?v=rs546105	rs546105	rs546105	3	0.99	0.01	0	0	0.00023	0.57	0.09	0.01	A	G	0.37	http://www.ncbi.nlm.nih.gov/sites/entrez?Db=gene&Cmd=ShowDetailView&TermToSearch=50939&ordinalpos=1&itool=EntrezSystem2.PEntrez.Gene.Gene_ResultsPanel.Gene_RVDocSum	IMPG2	IMPG2	0	http://www.ncbi.nlm.nih.gov/sites/entrez?Db=gene&Cmd=ShowDetailView&TermToSearch=57337&ordinalpos=1&itool=EntrezSystem2.PEntrez.Gene.Gene_ResultsPanel.Gene_RVDocSum	SENP7	SENP7	75	http://www.ncbi.nlm.nih.gov/sites/entrez?Db=gene&Cmd=ShowDetailView&TermToSearch=643412&ordinalpos=1&itool=EntrezSystem2.PEntrez.Gene.Gene_ResultsPanel.Gene_RVDocSum	LOC643412	LOC643412	208	2.2	-0.2	2	0.4	0.3	0.00025	0.033	-0.7	-0.4	-0.5	-0.3	0.38	0.78	0.79
http://www.ensembl.org/Homo_sapiens/Variation/Summary?v=rs1994201	rs1994201	rs1994201	3	0.99	0.01	0	0	0.00022	0.63	0.09	0.01	A	G	0.36	http://www.ncbi.nlm.nih.gov/sites/entrez?Db=gene&Cmd=ShowDetailView&TermToSearch=50939&ordinalpos=1&itool=EntrezSystem2.PEntrez.Gene.Gene_ResultsPanel.Gene_RVDocSum	IMPG2	IMPG2	0	http://www.ncbi.nlm.nih.gov/sites/entrez?Db=gene&Cmd=ShowDetailView&TermToSearch=57337&ordinalpos=1&itool=EntrezSystem2.PEntrez.Gene.Gene_ResultsPanel.Gene_RVDocSum	SENP7	SENP7	73	http://www.ncbi.nlm.nih.gov/sites/entrez?Db=gene&Cmd=ShowDetailView&TermToSearch=643412&ordinalpos=1&itool=EntrezSystem2.PEntrez.Gene.Gene_ResultsPanel.Gene_RVDocSum	LOC643412	LOC643412	206	2.2	-0.2	2.1	0.4	0.3	0.0002	0.033	-0.7	-0.5	-0.5	-0.3	0.39	0.67	0.78
http://www.ensembl.org/Homo_sapiens/Variation/Summary?v=rs348881	rs348881	rs348881	3	0.99	0.01	0	0	0.00025	0.67	0.09	0.01	A	C	0.34	http://www.ncbi.nlm.nih.gov/sites/entrez?Db=gene&Cmd=ShowDetailView&TermToSearch=50939&ordinalpos=1&itool=EntrezSystem2.PEntrez.Gene.Gene_ResultsPanel.Gene_RVDocSum	IMPG2	IMPG2	0	http://www.ncbi.nlm.nih.gov/sites/entrez?Db=gene&Cmd=ShowDetailView&TermToSearch=57337&ordinalpos=1&itool=EntrezSystem2.PEntrez.Gene.Gene_ResultsPanel.Gene_RVDocSum	SENP7	SENP7	72	http://www.ncbi.nlm.nih.gov/sites/entrez?Db=gene&Cmd=ShowDetailView&TermToSearch=643412&ordinalpos=1&itool=EntrezSystem2.PEntrez.Gene.Gene_ResultsPanel.Gene_RVDocSum	LOC643412	LOC643412	205	2.1	-0.3	2	0.5	0.35	0.00028	0.021	-0.7	-0.4	-0.4	-0.3	0.37	0.53	0.71
http://www.ensembl.org/Homo_sapiens/Variation/Summary?v=rs774854	rs774854	rs774854	3	0.97	0.03	0	0	6.2e-05	0.19	-0.12	0.04	T	C	0.19	http://www.ncbi.nlm.nih.gov/sites/entrez?Db=gene&Cmd=ShowDetailView&TermToSearch=90102&ordinalpos=1&itool=EntrezSystem2.PEntrez.Gene.Gene_ResultsPanel.Gene_RVDocSum	PHLDB2	PHLDB2	0	http://www.ncbi.nlm.nih.gov/sites/entrez?Db=gene&Cmd=ShowDetailView&TermToSearch=55347&ordinalpos=1&itool=EntrezSystem2.PEntrez.Gene.Gene_ResultsPanel.Gene_RVDocSum	ABHD10	ABHD10	9	http://www.ncbi.nlm.nih.gov/sites/entrez?Db=gene&Cmd=ShowDetailView&TermToSearch=29114&ordinalpos=1&itool=EntrezSystem2.PEntrez.Gene.Gene_ResultsPanel.Gene_RVDocSum	TAGLN3	TAGLN3	29	2.5	-0.2	2.8	0.1	0.2	2.4e-05	0.091	-0.3	-0.3	-0.4	-0.1	0.41	0.57	0.3
http://www.ensembl.org/Homo_sapiens/Variation/Summary?v=rs581126	rs581126	rs581126	3	0.97	0.02	0	0	7.2e-05	0.21	-0.12	0.04	G	C	0.18	http://www.ncbi.nlm.nih.gov/sites/entrez?Db=gene&Cmd=ShowDetailView&TermToSearch=90102&ordinalpos=1&itool=EntrezSystem2.PEntrez.Gene.Gene_ResultsPanel.Gene_RVDocSum	PHLDB2	PHLDB2	0	http://www.ncbi.nlm.nih.gov/sites/entrez?Db=gene&Cmd=ShowDetailView&TermToSearch=55347&ordinalpos=1&itool=EntrezSystem2.PEntrez.Gene.Gene_ResultsPanel.Gene_RVDocSum	ABHD10	ABHD10	8	http://www.ncbi.nlm.nih.gov/sites/entrez?Db=gene&Cmd=ShowDetailView&TermToSearch=29114&ordinalpos=1&itool=EntrezSystem2.PEntrez.Gene.Gene_ResultsPanel.Gene_RVDocSum	TAGLN3	TAGLN3	28	2.4	-0.2	2.7	0.1	0.19	2.7e-05	0.097	-0.3	-0.3	-0.4	-0.2	0.39	0.66	0.32
http://www.ensembl.org/Homo_sapiens/Variation/Summary?v=rs529159	rs529159	rs529159	3	0.98	0.02	0	0	7.6e-05	0.23	-0.12	0.04	A	G	0.18	http://www.ncbi.nlm.nih.gov/sites/entrez?Db=gene&Cmd=ShowDetailView&TermToSearch=90102&ordinalpos=1&itool=EntrezSystem2.PEntrez.Gene.Gene_ResultsPanel.Gene_RVDocSum	PHLDB2	PHLDB2	0	http://www.ncbi.nlm.nih.gov/sites/entrez?Db=gene&Cmd=ShowDetailView&TermToSearch=55347&ordinalpos=1&itool=EntrezSystem2.PEntrez.Gene.Gene_ResultsPanel.Gene_RVDocSum	ABHD10	ABHD10	7	http://www.ncbi.nlm.nih.gov/sites/entrez?Db=gene&Cmd=ShowDetailView&TermToSearch=29114&ordinalpos=1&itool=EntrezSystem2.PEntrez.Gene.Gene_ResultsPanel.Gene_RVDocSum	TAGLN3	TAGLN3	27	2.4	-0.2	2.7	0.1	0.2	2.8e-05	0.096	-0.4	-0.3	-0.4	-0.2	0.41	0.69	0.33
http://www.ensembl.org/Homo_sapiens/Variation/Summary?v=rs12495201	rs12495201	rs12495201	3	0.99	0.01	0	0	0.00019	0.55	-0.14	-0.02	G	A	0.2	http://www.ncbi.nlm.nih.gov/sites/entrez?Db=gene&Cmd=ShowDetailView&TermToSearch=91653&ordinalpos=1&itool=EntrezSystem2.PEntrez.Gene.Gene_ResultsPanel.Gene_RVDocSum	BOC	BOC	35	http://www.ncbi.nlm.nih.gov/sites/entrez?Db=gene&Cmd=ShowDetailView&TermToSearch=25871&ordinalpos=1&itool=EntrezSystem2.PEntrez.Gene.Gene_ResultsPanel.Gene_RVDocSum	C3orf17	C3orf17	158	http://www.ncbi.nlm.nih.gov/sites/entrez?Db=gene&Cmd=ShowDetailView&TermToSearch=29083&ordinalpos=1&itool=EntrezSystem2.PEntrez.Gene.Gene_ResultsPanel.Gene_RVDocSum	GTPBP8	GTPBP8	176	2.1	0.4	1.6	-0.2	0.024	0.00053	0.89	-0.5	-0.4	-0.4	-0.1	0.9	0.78	0.22
http://www.ensembl.org/Homo_sapiens/Variation/Summary?v=rs2138213	rs2138213	rs2138213	3	0.99	0	0	0.01	0.094	1.1e-05	-0.06	0.15	C	T	0.14	http://www.ncbi.nlm.nih.gov/sites/entrez?Db=gene&Cmd=ShowDetailView&TermToSearch=2047&ordinalpos=1&itool=EntrezSystem2.PEntrez.Gene.Gene_ResultsPanel.Gene_RVDocSum	EPHB1	EPHB1	0	http://www.ncbi.nlm.nih.gov/sites/entrez?Db=gene&Cmd=ShowDetailView&TermToSearch=645218&ordinalpos=1&itool=EntrezSystem2.PEntrez.Gene.Gene_ResultsPanel.Gene_RVDocSum	LOC645218	LOC645218	17	http://www.ncbi.nlm.nih.gov/sites/entrez?Db=gene&Cmd=ShowDetailView&TermToSearch=339855&ordinalpos=1&itool=EntrezSystem2.PEntrez.Gene.Gene_ResultsPanel.Gene_RVDocSum	KY	KY	184	-0.1	0	0.2	0	0.13	0.052	0.19	3.1	0.5	0.9	0.8	0.022	0.0047	0.0062
http://www.ensembl.org/Homo_sapiens/Variation/Summary?v=rs1399708	rs1399708	rs1399708	3	0.99	0	0	0.01	0.076	1.2e-05	-0.06	0.15	T	C	0.14	http://www.ncbi.nlm.nih.gov/sites/entrez?Db=gene&Cmd=ShowDetailView&TermToSearch=2047&ordinalpos=1&itool=EntrezSystem2.PEntrez.Gene.Gene_ResultsPanel.Gene_RVDocSum	EPHB1	EPHB1	0	http://www.ncbi.nlm.nih.gov/sites/entrez?Db=gene&Cmd=ShowDetailView&TermToSearch=645218&ordinalpos=1&itool=EntrezSystem2.PEntrez.Gene.Gene_ResultsPanel.Gene_RVDocSum	LOC645218	LOC645218	16	http://www.ncbi.nlm.nih.gov/sites/entrez?Db=gene&Cmd=ShowDetailView&TermToSearch=339855&ordinalpos=1&itool=EntrezSystem2.PEntrez.Gene.Gene_ResultsPanel.Gene_RVDocSum	KY	KY	185	0	0	0.2	0	0.1	0.055	0.18	3.1	0.5	1	0.8	0.02	0.0042	0.0066
http://www.ensembl.org/Homo_sapiens/Variation/Summary?v=rs5021785	rs5021785	rs5021785	3	0.99	0.01	0	0	0.00016	0.15	0.1	-0.04	C	T	0.45	http://www.ncbi.nlm.nih.gov/sites/entrez?Db=gene&Cmd=ShowDetailView&TermToSearch=2761&ordinalpos=1&itool=EntrezSystem2.PEntrez.Gene.Gene_ResultsPanel.Gene_RVDocSum	GM2AP	GM2AP	349	http://www.ncbi.nlm.nih.gov/sites/entrez?Db=gene&Cmd=ShowDetailView&TermToSearch=389156&ordinalpos=1&itool=EntrezSystem2.PEntrez.Gene.Gene_ResultsPanel.Gene_RVDocSum	LOC389156	LOC389156	489	http://www.ncbi.nlm.nih.gov/sites/entrez?Db=gene&Cmd=ShowDetailView&TermToSearch=5352&ordinalpos=1&itool=EntrezSystem2.PEntrez.Gene.Gene_ResultsPanel.Gene_RVDocSum	PLOD2	PLOD2	734	2.1	0.2	0.7	0.5	0.051	0.0097	0.019	-0.3	-0.2	-0.3	-0.3	0.17	0.39	0.92
http://www.ensembl.org/Homo_sapiens/Variation/Summary?v=rs6799174	rs6799174	rs6799174	3	0.93	0.07	0	0	1.9e-05	0.63	0.2	-0.02	A	C	0.12	http://www.ncbi.nlm.nih.gov/sites/entrez?Db=gene&Cmd=ShowDetailView&TermToSearch=152118&ordinalpos=1&itool=EntrezSystem2.PEntrez.Gene.Gene_ResultsPanel.Gene_RVDocSum	LOC152118	LOC152118	122	http://www.ncbi.nlm.nih.gov/sites/entrez?Db=gene&Cmd=ShowDetailView&TermToSearch=5912&ordinalpos=1&itool=EntrezSystem2.PEntrez.Gene.Gene_ResultsPanel.Gene_RVDocSum	RAP2B	RAP2B	456	http://www.ncbi.nlm.nih.gov/sites/entrez?Db=gene&Cmd=ShowDetailView&TermToSearch=646992&ordinalpos=1&itool=EntrezSystem2.PEntrez.Gene.Gene_ResultsPanel.Gene_RVDocSum	LOC646992	LOC646992	495	2.9	0.5	0.9	0.5	0.024	0.0053	0.015	-0.4	0.3	-0.3	0.1	0.04	0.89	0.092
http://www.ensembl.org/Homo_sapiens/Variation/Summary?v=rs6806502	rs6806502	rs6806502	3	0.93	0.07	0	0	2.5e-05	0.64	0.17	-0.02	T	C	0.12	http://www.ncbi.nlm.nih.gov/sites/entrez?Db=gene&Cmd=ShowDetailView&TermToSearch=152118&ordinalpos=1&itool=EntrezSystem2.PEntrez.Gene.Gene_ResultsPanel.Gene_RVDocSum	LOC152118	LOC152118	132	http://www.ncbi.nlm.nih.gov/sites/entrez?Db=gene&Cmd=ShowDetailView&TermToSearch=5912&ordinalpos=1&itool=EntrezSystem2.PEntrez.Gene.Gene_ResultsPanel.Gene_RVDocSum	RAP2B	RAP2B	466	http://www.ncbi.nlm.nih.gov/sites/entrez?Db=gene&Cmd=ShowDetailView&TermToSearch=26084&ordinalpos=1&itool=EntrezSystem2.PEntrez.Gene.Gene_ResultsPanel.Gene_RVDocSum	SGEF	SGEF	486	2.9	0.4	1	0.5	0.043	0.0032	0.015	-0.4	0.3	-0.3	0	0.047	0.79	0.16
http://www.ensembl.org/Homo_sapiens/Variation/Summary?v=rs1608372	rs1608372	rs1608372	3	0.98	0.02	0	0	0.00012	0.75	0.15	-0.01	C	T	0.12	http://www.ncbi.nlm.nih.gov/sites/entrez?Db=gene&Cmd=ShowDetailView&TermToSearch=152118&ordinalpos=1&itool=EntrezSystem2.PEntrez.Gene.Gene_ResultsPanel.Gene_RVDocSum	LOC152118	LOC152118	160	http://www.ncbi.nlm.nih.gov/sites/entrez?Db=gene&Cmd=ShowDetailView&TermToSearch=26084&ordinalpos=1&itool=EntrezSystem2.PEntrez.Gene.Gene_ResultsPanel.Gene_RVDocSum	SGEF	SGEF	458	http://www.ncbi.nlm.nih.gov/sites/entrez?Db=gene&Cmd=ShowDetailView&TermToSearch=5912&ordinalpos=1&itool=EntrezSystem2.PEntrez.Gene.Gene_ResultsPanel.Gene_RVDocSum	RAP2B	RAP2B	495	2.4	0.3	0.8	0.4	0.054	0.0068	0.03	-0.4	0.2	-0.3	0	0.079	0.65	0.13
http://www.ensembl.org/Homo_sapiens/Variation/Summary?v=rs6440906	rs6440906	rs6440906	3	0.99	0.01	0	0	0.00027	0.8	0.14	-0.01	T	C	0.12	http://www.ncbi.nlm.nih.gov/sites/entrez?Db=gene&Cmd=ShowDetailView&TermToSearch=152118&ordinalpos=1&itool=EntrezSystem2.PEntrez.Gene.Gene_ResultsPanel.Gene_RVDocSum	LOC152118	LOC152118	162	http://www.ncbi.nlm.nih.gov/sites/entrez?Db=gene&Cmd=ShowDetailView&TermToSearch=26084&ordinalpos=1&itool=EntrezSystem2.PEntrez.Gene.Gene_ResultsPanel.Gene_RVDocSum	SGEF	SGEF	457	http://www.ncbi.nlm.nih.gov/sites/entrez?Db=gene&Cmd=ShowDetailView&TermToSearch=5912&ordinalpos=1&itool=EntrezSystem2.PEntrez.Gene.Gene_ResultsPanel.Gene_RVDocSum	RAP2B	RAP2B	496	2.2	0.3	0.8	0.2	0.055	0.0088	0.072	-0.4	0.2	-0.3	0	0.078	0.59	0.13
http://www.ensembl.org/Homo_sapiens/Variation/Summary?v=rs12496435	rs12496435	rs12496435	3	0.98	0.02	0	0	0.00017	0.75	0.14	-0.01	G	A	0.12	http://www.ncbi.nlm.nih.gov/sites/entrez?Db=gene&Cmd=ShowDetailView&TermToSearch=152118&ordinalpos=1&itool=EntrezSystem2.PEntrez.Gene.Gene_ResultsPanel.Gene_RVDocSum	LOC152118	LOC152118	162	http://www.ncbi.nlm.nih.gov/sites/entrez?Db=gene&Cmd=ShowDetailView&TermToSearch=26084&ordinalpos=1&itool=EntrezSystem2.PEntrez.Gene.Gene_ResultsPanel.Gene_RVDocSum	SGEF	SGEF	457	http://www.ncbi.nlm.nih.gov/sites/entrez?Db=gene&Cmd=ShowDetailView&TermToSearch=5912&ordinalpos=1&itool=EntrezSystem2.PEntrez.Gene.Gene_ResultsPanel.Gene_RVDocSum	RAP2B	RAP2B	496	2.3	0.3	0.8	0.3	0.048	0.0069	0.042	-0.4	0.1	-0.3	0.1	0.11	0.64	0.12
rs-link	rsnum	SNP	chr	HO	HS	HD	HS+D	P-value-S	P-value-D	Effect-S	Effect-D	Minor Allele	Major Allele	MAF	GENE1-link	GENE1	GENE1	dist1 (Kb)	GENE2-link	GENE2	GENE2	dist2 (Kb)	GENE3-link	GENE3	GENE3	dist3 (Kb)	log10BF-S	log10BF-S-TNT	log10BF-S-PRINCE	log10BF-S-CAP	P-value-S-TNT	P-value-S-PRINCE	P-value-S-CAP	log10BF-D	log10BF-D-TNT	log10BF-D-PRINCE	log10BF-D-CAP	P-value-D-TNT	P-value-D-PRINCE	P-value-D-CAP
http://www.ensembl.org/Homo_sapiens/Variation/Summary?v=rs1523276	rs1523276	rs1523276	3	0.98	0.02	0	0	0.0002	0.66	0.15	-0.02	G	C	0.12	http://www.ncbi.nlm.nih.gov/sites/entrez?Db=gene&Cmd=ShowDetailView&TermToSearch=152118&ordinalpos=1&itool=EntrezSystem2.PEntrez.Gene.Gene_ResultsPanel.Gene_RVDocSum	LOC152118	LOC152118	167	http://www.ncbi.nlm.nih.gov/sites/entrez?Db=gene&Cmd=ShowDetailView&TermToSearch=26084&ordinalpos=1&itool=EntrezSystem2.PEntrez.Gene.Gene_ResultsPanel.Gene_RVDocSum	SGEF	SGEF	451	http://www.ncbi.nlm.nih.gov/sites/entrez?Db=gene&Cmd=ShowDetailView&TermToSearch=5912&ordinalpos=1&itool=EntrezSystem2.PEntrez.Gene.Gene_ResultsPanel.Gene_RVDocSum	RAP2B	RAP2B	502	2.3	0.3	0.6	0.5	0.058	0.015	0.018	-0.4	0.2	-0.3	0.1	0.064	0.73	0.13
http://www.ensembl.org/Homo_sapiens/Variation/Summary?v=rs6780561	rs6780561	rs6780561	3	0.99	0.01	0	0.01	0.00063	0.0049	0.12	0.1	G	A	0.45	http://www.ncbi.nlm.nih.gov/sites/entrez?Db=gene&Cmd=ShowDetailView&TermToSearch=5337&ordinalpos=1&itool=EntrezSystem2.PEntrez.Gene.Gene_ResultsPanel.Gene_RVDocSum	PLD1	PLD1	6	http://www.ncbi.nlm.nih.gov/sites/entrez?Db=gene&Cmd=ShowDetailView&TermToSearch=23043&ordinalpos=1&itool=EntrezSystem2.PEntrez.Gene.Gene_ResultsPanel.Gene_RVDocSum	TNIK	TNIK	135	http://www.ncbi.nlm.nih.gov/sites/entrez?Db=gene&Cmd=ShowDetailView&TermToSearch=693154&ordinalpos=1&itool=EntrezSystem2.PEntrez.Gene.Gene_ResultsPanel.Gene_RVDocSum	MIRN569	MIRN569	488	1.8	-0.2	1.9	-0.1	0.42	0.00032	0.28	1.2	0.9	0.1	-0.3	0.0047	0.14	0.59
http://www.ensembl.org/Homo_sapiens/Variation/Summary?v=rs2168205	rs2168205	rs2168205	3	0.99	0	0	0.01	0.012	7e-05	-0.06	-0.09	T	C	0.43	http://www.ncbi.nlm.nih.gov/sites/entrez?Db=gene&Cmd=ShowDetailView&TermToSearch=5337&ordinalpos=1&itool=EntrezSystem2.PEntrez.Gene.Gene_ResultsPanel.Gene_RVDocSum	PLD1	PLD1	0	http://www.ncbi.nlm.nih.gov/sites/entrez?Db=gene&Cmd=ShowDetailView&TermToSearch=23043&ordinalpos=1&itool=EntrezSystem2.PEntrez.Gene.Gene_ResultsPanel.Gene_RVDocSum	TNIK	TNIK	241	http://www.ncbi.nlm.nih.gov/sites/entrez?Db=gene&Cmd=ShowDetailView&TermToSearch=64778&ordinalpos=1&itool=EntrezSystem2.PEntrez.Gene.Gene_ResultsPanel.Gene_RVDocSum	FNDC3B	FNDC3B	411	0.7	-0.3	0.7	-0.3	0.19	0.01	0.83	2.4	1.2	0.7	-0.3	0.0018	0.0084	0.6
http://www.ensembl.org/Homo_sapiens/Variation/Summary?v=rs1902139	rs1902139	rs1902139	3	0.99	0	0	0.01	0.012	7.5e-05	-0.06	-0.09	G	T	0.43	http://www.ncbi.nlm.nih.gov/sites/entrez?Db=gene&Cmd=ShowDetailView&TermToSearch=5337&ordinalpos=1&itool=EntrezSystem2.PEntrez.Gene.Gene_ResultsPanel.Gene_RVDocSum	PLD1	PLD1	0	http://www.ncbi.nlm.nih.gov/sites/entrez?Db=gene&Cmd=ShowDetailView&TermToSearch=23043&ordinalpos=1&itool=EntrezSystem2.PEntrez.Gene.Gene_ResultsPanel.Gene_RVDocSum	TNIK	TNIK	242	http://www.ncbi.nlm.nih.gov/sites/entrez?Db=gene&Cmd=ShowDetailView&TermToSearch=64778&ordinalpos=1&itool=EntrezSystem2.PEntrez.Gene.Gene_ResultsPanel.Gene_RVDocSum	FNDC3B	FNDC3B	410	0.7	-0.3	0.7	-0.3	0.2	0.0098	0.83	2.4	1.2	0.7	-0.3	0.002	0.0082	0.59
http://www.ensembl.org/Homo_sapiens/Variation/Summary?v=rs9850783	rs9850783	rs9850783	3	0.99	0	0	0.01	0.011	7.6e-05	-0.06	-0.09	C	T	0.43	http://www.ncbi.nlm.nih.gov/sites/entrez?Db=gene&Cmd=ShowDetailView&TermToSearch=5337&ordinalpos=1&itool=EntrezSystem2.PEntrez.Gene.Gene_ResultsPanel.Gene_RVDocSum	PLD1	PLD1	0	http://www.ncbi.nlm.nih.gov/sites/entrez?Db=gene&Cmd=ShowDetailView&TermToSearch=23043&ordinalpos=1&itool=EntrezSystem2.PEntrez.Gene.Gene_ResultsPanel.Gene_RVDocSum	TNIK	TNIK	244	http://www.ncbi.nlm.nih.gov/sites/entrez?Db=gene&Cmd=ShowDetailView&TermToSearch=64778&ordinalpos=1&itool=EntrezSystem2.PEntrez.Gene.Gene_ResultsPanel.Gene_RVDocSum	FNDC3B	FNDC3B	408	0.7	-0.3	0.7	-0.3	0.19	0.0097	0.83	2.4	1.2	0.7	-0.3	0.002	0.0082	0.59
http://www.ensembl.org/Homo_sapiens/Variation/Summary?v=rs4261904	rs4261904	rs4261904	3	0.99	0	0	0.01	0.012	6.4e-05	-0.06	-0.1	A	T	0.49	http://www.ncbi.nlm.nih.gov/sites/entrez?Db=gene&Cmd=ShowDetailView&TermToSearch=5337&ordinalpos=1&itool=EntrezSystem2.PEntrez.Gene.Gene_ResultsPanel.Gene_RVDocSum	PLD1	PLD1	2	http://www.ncbi.nlm.nih.gov/sites/entrez?Db=gene&Cmd=ShowDetailView&TermToSearch=23043&ordinalpos=1&itool=EntrezSystem2.PEntrez.Gene.Gene_ResultsPanel.Gene_RVDocSum	TNIK	TNIK	280	http://www.ncbi.nlm.nih.gov/sites/entrez?Db=gene&Cmd=ShowDetailView&TermToSearch=64778&ordinalpos=1&itool=EntrezSystem2.PEntrez.Gene.Gene_ResultsPanel.Gene_RVDocSum	FNDC3B	FNDC3B	373	0.7	-0.2	0.6	-0.3	0.14	0.014	0.96	2.4	1.1	0.9	-0.3	0.0031	0.0053	0.51
http://www.ensembl.org/Homo_sapiens/Variation/Summary?v=rs9871646	rs9871646	rs9871646	3	0.99	0	0	0.01	0.01	9e-05	-0.06	-0.1	C	T	0.47	http://www.ncbi.nlm.nih.gov/sites/entrez?Db=gene&Cmd=ShowDetailView&TermToSearch=5337&ordinalpos=1&itool=EntrezSystem2.PEntrez.Gene.Gene_ResultsPanel.Gene_RVDocSum	PLD1	PLD1	6	http://www.ncbi.nlm.nih.gov/sites/entrez?Db=gene&Cmd=ShowDetailView&TermToSearch=23043&ordinalpos=1&itool=EntrezSystem2.PEntrez.Gene.Gene_ResultsPanel.Gene_RVDocSum	TNIK	TNIK	284	http://www.ncbi.nlm.nih.gov/sites/entrez?Db=gene&Cmd=ShowDetailView&TermToSearch=64778&ordinalpos=1&itool=EntrezSystem2.PEntrez.Gene.Gene_ResultsPanel.Gene_RVDocSum	FNDC3B	FNDC3B	369	0.8	-0.1	0.6	-0.3	0.11	0.015	0.97	2.3	0.9	1	-0.3	0.0047	0.0038	0.6
http://www.ensembl.org/Homo_sapiens/Variation/Summary?v=rs9827435	rs9827435	rs9827435	3	0.98	0	0	0.02	0.0056	8.8e-05	-0.07	-0.09	C	A	0.43	http://www.ncbi.nlm.nih.gov/sites/entrez?Db=gene&Cmd=ShowDetailView&TermToSearch=5337&ordinalpos=1&itool=EntrezSystem2.PEntrez.Gene.Gene_ResultsPanel.Gene_RVDocSum	PLD1	PLD1	13	http://www.ncbi.nlm.nih.gov/sites/entrez?Db=gene&Cmd=ShowDetailView&TermToSearch=23043&ordinalpos=1&itool=EntrezSystem2.PEntrez.Gene.Gene_ResultsPanel.Gene_RVDocSum	TNIK	TNIK	291	http://www.ncbi.nlm.nih.gov/sites/entrez?Db=gene&Cmd=ShowDetailView&TermToSearch=64778&ordinalpos=1&itool=EntrezSystem2.PEntrez.Gene.Gene_ResultsPanel.Gene_RVDocSum	FNDC3B	FNDC3B	361	1	0	0.7	-0.3	0.09	0.01	0.89	2.3	1	0.9	-0.3	0.0041	0.0051	0.53
http://www.ensembl.org/Homo_sapiens/Variation/Summary?v=rs4446237	rs4446237	rs4446237	3	0.98	0	0	0.02	0.0047	0.0001	-0.07	-0.09	T	C	0.42	http://www.ncbi.nlm.nih.gov/sites/entrez?Db=gene&Cmd=ShowDetailView&TermToSearch=5337&ordinalpos=1&itool=EntrezSystem2.PEntrez.Gene.Gene_ResultsPanel.Gene_RVDocSum	PLD1	PLD1	16	http://www.ncbi.nlm.nih.gov/sites/entrez?Db=gene&Cmd=ShowDetailView&TermToSearch=23043&ordinalpos=1&itool=EntrezSystem2.PEntrez.Gene.Gene_ResultsPanel.Gene_RVDocSum	TNIK	TNIK	294	http://www.ncbi.nlm.nih.gov/sites/entrez?Db=gene&Cmd=ShowDetailView&TermToSearch=64778&ordinalpos=1&itool=EntrezSystem2.PEntrez.Gene.Gene_ResultsPanel.Gene_RVDocSum	FNDC3B	FNDC3B	358	1.1	0	0.7	-0.3	0.075	0.011	0.87	2.2	0.9	0.9	-0.3	0.005	0.0053	0.52
http://www.ensembl.org/Homo_sapiens/Variation/Summary?v=rs11715665	rs11715665	rs11715665	3	0.98	0	0	0.02	0.0042	0.00014	-0.07	-0.09	C	T	0.41	http://www.ncbi.nlm.nih.gov/sites/entrez?Db=gene&Cmd=ShowDetailView&TermToSearch=5337&ordinalpos=1&itool=EntrezSystem2.PEntrez.Gene.Gene_ResultsPanel.Gene_RVDocSum	PLD1	PLD1	28	http://www.ncbi.nlm.nih.gov/sites/entrez?Db=gene&Cmd=ShowDetailView&TermToSearch=23043&ordinalpos=1&itool=EntrezSystem2.PEntrez.Gene.Gene_ResultsPanel.Gene_RVDocSum	TNIK	TNIK	306	http://www.ncbi.nlm.nih.gov/sites/entrez?Db=gene&Cmd=ShowDetailView&TermToSearch=64778&ordinalpos=1&itool=EntrezSystem2.PEntrez.Gene.Gene_ResultsPanel.Gene_RVDocSum	FNDC3B	FNDC3B	347	1.1	0	0.8	-0.3	0.069	0.0088	0.94	2.1	0.8	0.9	-0.3	0.0059	0.0053	0.59
http://www.ensembl.org/Homo_sapiens/Variation/Summary?v=rs11711587	rs11711587	rs11711587	3	0.98	0	0	0.02	0.004	0.00015	-0.07	-0.09	A	G	0.41	http://www.ncbi.nlm.nih.gov/sites/entrez?Db=gene&Cmd=ShowDetailView&TermToSearch=5337&ordinalpos=1&itool=EntrezSystem2.PEntrez.Gene.Gene_ResultsPanel.Gene_RVDocSum	PLD1	PLD1	28	http://www.ncbi.nlm.nih.gov/sites/entrez?Db=gene&Cmd=ShowDetailView&TermToSearch=23043&ordinalpos=1&itool=EntrezSystem2.PEntrez.Gene.Gene_ResultsPanel.Gene_RVDocSum	TNIK	TNIK	306	http://www.ncbi.nlm.nih.gov/sites/entrez?Db=gene&Cmd=ShowDetailView&TermToSearch=64778&ordinalpos=1&itool=EntrezSystem2.PEntrez.Gene.Gene_ResultsPanel.Gene_RVDocSum	FNDC3B	FNDC3B	347	1.2	0.1	0.8	-0.3	0.065	0.0087	0.95	2.1	0.8	0.9	-0.3	0.0058	0.0054	0.6
http://www.ensembl.org/Homo_sapiens/Variation/Summary?v=rs12186237	rs12186237	rs12186237	4	0.98	0.01	0	0	9.6e-05	0.17	-0.27	0.09	A	G	0.08	http://www.ncbi.nlm.nih.gov/sites/entrez?Db=gene&Cmd=ShowDetailView&TermToSearch=4487&ordinalpos=1&itool=EntrezSystem2.PEntrez.Gene.Gene_ResultsPanel.Gene_RVDocSum	MSX1	MSX1	87	http://www.ncbi.nlm.nih.gov/sites/entrez?Db=gene&Cmd=ShowDetailView&TermToSearch=3940&ordinalpos=1&itool=EntrezSystem2.PEntrez.Gene.Gene_ResultsPanel.Gene_RVDocSum	LDHAL1	LDHAL1	121	http://www.ncbi.nlm.nih.gov/sites/entrez?Db=gene&Cmd=ShowDetailView&TermToSearch=53407&ordinalpos=1&itool=EntrezSystem2.PEntrez.Gene.Gene_ResultsPanel.Gene_RVDocSum	STX18	STX18	231	2.2	NA	1.9	0.1	NA	0.00018	0.12	0	NA	-0.1	-0.1	NA	0.24	0.47
http://www.ensembl.org/Homo_sapiens/Variation/Summary?v=rs2688219	rs2688219	rs2688219	4	0.99	0.01	0	0	0.00018	0.9	-0.09	0	T	C	0.36	http://www.ncbi.nlm.nih.gov/sites/entrez?Db=gene&Cmd=ShowDetailView&TermToSearch=8310&ordinalpos=1&itool=EntrezSystem2.PEntrez.Gene.Gene_ResultsPanel.Gene_RVDocSum	ACOX3	ACOX3	2	http://www.ncbi.nlm.nih.gov/sites/entrez?Db=gene&Cmd=ShowDetailView&TermToSearch=152992&ordinalpos=1&itool=EntrezSystem2.PEntrez.Gene.Gene_ResultsPanel.Gene_RVDocSum	C4orf23	C4orf23	12	http://www.ncbi.nlm.nih.gov/sites/entrez?Db=gene&Cmd=ShowDetailView&TermToSearch=401120&ordinalpos=1&itool=EntrezSystem2.PEntrez.Gene.Gene_ResultsPanel.Gene_RVDocSum	FLJ45966	FLJ45966	64	2.1	0.8	1	-0.3	0.0072	0.0041	0.65	-0.7	-0.5	-0.5	-0.3	0.84	0.71	0.62
http://www.ensembl.org/Homo_sapiens/Variation/Summary?v=rs939353	rs939353	rs939353	4	0.98	0.01	0	0	0.00012	0.48	0.11	0.02	T	C	0.21	http://www.ncbi.nlm.nih.gov/sites/entrez?Db=gene&Cmd=ShowDetailView&TermToSearch=10568&ordinalpos=1&itool=EntrezSystem2.PEntrez.Gene.Gene_ResultsPanel.Gene_RVDocSum	SLC34A2	SLC34A2	62	http://www.ncbi.nlm.nih.gov/sites/entrez?Db=gene&Cmd=ShowDetailView&TermToSearch=645433&ordinalpos=1&itool=EntrezSystem2.PEntrez.Gene.Gene_ResultsPanel.Gene_RVDocSum	LOC645433	LOC645433	88	http://www.ncbi.nlm.nih.gov/sites/entrez?Db=gene&Cmd=ShowDetailView&TermToSearch=23231&ordinalpos=1&itool=EntrezSystem2.PEntrez.Gene.Gene_ResultsPanel.Gene_RVDocSum	KIAA0746	KIAA0746	153	2.2	1	0	0.4	0.004	0.12	0.025	-0.6	-0.5	-0.4	-0.2	0.96	0.57	0.41
http://www.ensembl.org/Homo_sapiens/Variation/Summary?v=rs11722379	rs11722379	rs11722379	4	0.89	0.11	0	0	4.1e-05	0.98	-0.11	0	C	T	0.37	http://www.ncbi.nlm.nih.gov/sites/entrez?Db=gene&Cmd=ShowDetailView&TermToSearch=399&ordinalpos=1&itool=EntrezSystem2.PEntrez.Gene.Gene_ResultsPanel.Gene_RVDocSum	RHOH	RHOH	15	http://www.ncbi.nlm.nih.gov/sites/entrez?Db=gene&Cmd=ShowDetailView&TermToSearch=55584&ordinalpos=1&itool=EntrezSystem2.PEntrez.Gene.Gene_ResultsPanel.Gene_RVDocSum	CHRNA9	CHRNA9	95	http://www.ncbi.nlm.nih.gov/sites/entrez?Db=gene&Cmd=ShowDetailView&TermToSearch=55728&ordinalpos=1&itool=EntrezSystem2.PEntrez.Gene.Gene_ResultsPanel.Gene_RVDocSum	N4BP2	N4BP2	104	3.1	0.8	0.9	0.5	0.024	0.005	0.019	-0.7	-0.5	-0.3	-0.2	0.91	0.68	0.63
http://www.ensembl.org/Homo_sapiens/Variation/Summary?v=rs12643250	rs12643250	rs12643250	4	0.77	0.22	0	0	1.9e-05	0.97	-0.11	0	G	A	0.35	http://www.ncbi.nlm.nih.gov/sites/entrez?Db=gene&Cmd=ShowDetailView&TermToSearch=399&ordinalpos=1&itool=EntrezSystem2.PEntrez.Gene.Gene_ResultsPanel.Gene_RVDocSum	RHOH	RHOH	17	http://www.ncbi.nlm.nih.gov/sites/entrez?Db=gene&Cmd=ShowDetailView&TermToSearch=55584&ordinalpos=1&itool=EntrezSystem2.PEntrez.Gene.Gene_ResultsPanel.Gene_RVDocSum	CHRNA9	CHRNA9	93	http://www.ncbi.nlm.nih.gov/sites/entrez?Db=gene&Cmd=ShowDetailView&TermToSearch=55728&ordinalpos=1&itool=EntrezSystem2.PEntrez.Gene.Gene_ResultsPanel.Gene_RVDocSum	N4BP2	N4BP2	106	3.5	0.9	1	0.8	0.037	0.0035	0.0066	-0.7	-0.5	-0.4	-0.2	0.87	0.71	0.46
http://www.ensembl.org/Homo_sapiens/Variation/Summary?v=rs11097019	rs11097019	rs11097019	4	0.82	0.18	0	0	3.5e-05	0.86	-0.11	0	A	C	0.32	http://www.ncbi.nlm.nih.gov/sites/entrez?Db=gene&Cmd=ShowDetailView&TermToSearch=399&ordinalpos=1&itool=EntrezSystem2.PEntrez.Gene.Gene_ResultsPanel.Gene_RVDocSum	RHOH	RHOH	21	http://www.ncbi.nlm.nih.gov/sites/entrez?Db=gene&Cmd=ShowDetailView&TermToSearch=55584&ordinalpos=1&itool=EntrezSystem2.PEntrez.Gene.Gene_ResultsPanel.Gene_RVDocSum	CHRNA9	CHRNA9	89	http://www.ncbi.nlm.nih.gov/sites/entrez?Db=gene&Cmd=ShowDetailView&TermToSearch=55728&ordinalpos=1&itool=EntrezSystem2.PEntrez.Gene.Gene_ResultsPanel.Gene_RVDocSum	N4BP2	N4BP2	110	3.4	0.8	1	0.8	0.042	0.004	0.0074	-0.7	-0.5	-0.3	-0.2	0.89	0.53	0.46
http://www.ensembl.org/Homo_sapiens/Variation/Summary?v=rs11941771	rs11941771	rs11941771	4	0.91	0.09	0	0	0.00015	0.81	-0.1	-0.01	C	G	0.36	http://www.ncbi.nlm.nih.gov/sites/entrez?Db=gene&Cmd=ShowDetailView&TermToSearch=399&ordinalpos=1&itool=EntrezSystem2.PEntrez.Gene.Gene_ResultsPanel.Gene_RVDocSum	RHOH	RHOH	22	http://www.ncbi.nlm.nih.gov/sites/entrez?Db=gene&Cmd=ShowDetailView&TermToSearch=55584&ordinalpos=1&itool=EntrezSystem2.PEntrez.Gene.Gene_ResultsPanel.Gene_RVDocSum	CHRNA9	CHRNA9	88	http://www.ncbi.nlm.nih.gov/sites/entrez?Db=gene&Cmd=ShowDetailView&TermToSearch=55728&ordinalpos=1&itool=EntrezSystem2.PEntrez.Gene.Gene_ResultsPanel.Gene_RVDocSum	N4BP2	N4BP2	111	3	0.8	1	0.7	0.08	0.004	0.0085	-0.7	-0.6	-0.3	-0.3	0.83	0.65	0.63
http://www.ensembl.org/Homo_sapiens/Variation/Summary?v=rs12502196	rs12502196	rs12502196	4	0.98	0.02	0	0	0.00016	0.34	-0.13	-0.03	T	A	0.18	http://www.ncbi.nlm.nih.gov/sites/entrez?Db=gene&Cmd=ShowDetailView&TermToSearch=729407&ordinalpos=1&itool=EntrezSystem2.PEntrez.Gene.Gene_ResultsPanel.Gene_RVDocSum	LOC729407	LOC729407	166	http://www.ncbi.nlm.nih.gov/sites/entrez?Db=gene&Cmd=ShowDetailView&TermToSearch=3600&ordinalpos=1&itool=EntrezSystem2.PEntrez.Gene.Gene_ResultsPanel.Gene_RVDocSum	IL15	IL15	192	http://www.ncbi.nlm.nih.gov/sites/entrez?Db=gene&Cmd=ShowDetailView&TermToSearch=27309&ordinalpos=1&itool=EntrezSystem2.PEntrez.Gene.Gene_ResultsPanel.Gene_RVDocSum	ZNF330	ZNF330	210	2.3	1.2	0.3	-0.1	0.0022	0.039	0.3	-0.4	-0.4	-0.1	-0.2	0.88	0.18	0.52
http://www.ensembl.org/Homo_sapiens/Variation/Summary?v=rs12505771	rs12505771	rs12505771	4	0.98	0.02	0	0	0.00017	0.34	-0.13	-0.03	A	G	0.18	http://www.ncbi.nlm.nih.gov/sites/entrez?Db=gene&Cmd=ShowDetailView&TermToSearch=729407&ordinalpos=1&itool=EntrezSystem2.PEntrez.Gene.Gene_ResultsPanel.Gene_RVDocSum	LOC729407	LOC729407	167	http://www.ncbi.nlm.nih.gov/sites/entrez?Db=gene&Cmd=ShowDetailView&TermToSearch=3600&ordinalpos=1&itool=EntrezSystem2.PEntrez.Gene.Gene_ResultsPanel.Gene_RVDocSum	IL15	IL15	191	http://www.ncbi.nlm.nih.gov/sites/entrez?Db=gene&Cmd=ShowDetailView&TermToSearch=27309&ordinalpos=1&itool=EntrezSystem2.PEntrez.Gene.Gene_ResultsPanel.Gene_RVDocSum	ZNF330	ZNF330	211	2.3	1.2	0.3	-0.1	0.0022	0.04	0.29	-0.4	-0.4	-0.1	-0.2	0.88	0.18	0.54
http://www.ensembl.org/Homo_sapiens/Variation/Summary?v=rs6838494	rs6838494	rs6838494	4	0.98	0.02	0	0	0.00017	0.34	-0.13	-0.03	A	C	0.18	http://www.ncbi.nlm.nih.gov/sites/entrez?Db=gene&Cmd=ShowDetailView&TermToSearch=729407&ordinalpos=1&itool=EntrezSystem2.PEntrez.Gene.Gene_ResultsPanel.Gene_RVDocSum	LOC729407	LOC729407	167	http://www.ncbi.nlm.nih.gov/sites/entrez?Db=gene&Cmd=ShowDetailView&TermToSearch=3600&ordinalpos=1&itool=EntrezSystem2.PEntrez.Gene.Gene_ResultsPanel.Gene_RVDocSum	IL15	IL15	190	http://www.ncbi.nlm.nih.gov/sites/entrez?Db=gene&Cmd=ShowDetailView&TermToSearch=27309&ordinalpos=1&itool=EntrezSystem2.PEntrez.Gene.Gene_ResultsPanel.Gene_RVDocSum	ZNF330	ZNF330	212	2.3	1.2	0.3	-0.1	0.0022	0.041	0.3	-0.4	-0.4	-0.1	-0.2	0.88	0.18	0.55
http://www.ensembl.org/Homo_sapiens/Variation/Summary?v=rs6837853	rs6837853	rs6837853	4	0.97	0.03	0	0	0.00013	0.36	-0.13	-0.03	A	G	0.19	http://www.ncbi.nlm.nih.gov/sites/entrez?Db=gene&Cmd=ShowDetailView&TermToSearch=729407&ordinalpos=1&itool=EntrezSystem2.PEntrez.Gene.Gene_ResultsPanel.Gene_RVDocSum	LOC729407	LOC729407	168	http://www.ncbi.nlm.nih.gov/sites/entrez?Db=gene&Cmd=ShowDetailView&TermToSearch=3600&ordinalpos=1&itool=EntrezSystem2.PEntrez.Gene.Gene_ResultsPanel.Gene_RVDocSum	IL15	IL15	190	http://www.ncbi.nlm.nih.gov/sites/entrez?Db=gene&Cmd=ShowDetailView&TermToSearch=27309&ordinalpos=1&itool=EntrezSystem2.PEntrez.Gene.Gene_ResultsPanel.Gene_RVDocSum	ZNF330	ZNF330	212	2.5	1.3	0.3	0	0.002	0.049	0.18	-0.4	-0.4	-0.1	-0.2	0.89	0.18	0.62
http://www.ensembl.org/Homo_sapiens/Variation/Summary?v=rs13106759	rs13106759	rs13106759	4	0.98	0.02	0	0	0.00018	0.34	-0.13	-0.03	A	G	0.18	http://www.ncbi.nlm.nih.gov/sites/entrez?Db=gene&Cmd=ShowDetailView&TermToSearch=729407&ordinalpos=1&itool=EntrezSystem2.PEntrez.Gene.Gene_ResultsPanel.Gene_RVDocSum	LOC729407	LOC729407	173	http://www.ncbi.nlm.nih.gov/sites/entrez?Db=gene&Cmd=ShowDetailView&TermToSearch=3600&ordinalpos=1&itool=EntrezSystem2.PEntrez.Gene.Gene_ResultsPanel.Gene_RVDocSum	IL15	IL15	185	http://www.ncbi.nlm.nih.gov/sites/entrez?Db=gene&Cmd=ShowDetailView&TermToSearch=27309&ordinalpos=1&itool=EntrezSystem2.PEntrez.Gene.Gene_ResultsPanel.Gene_RVDocSum	ZNF330	ZNF330	217	2.3	1.2	0.3	-0.1	0.0022	0.041	0.3	-0.4	-0.4	-0.1	-0.2	0.88	0.17	0.55
http://www.ensembl.org/Homo_sapiens/Variation/Summary?v=rs12506151	rs12506151	rs12506151	4	0.98	0.02	0	0	0.00015	0.35	-0.14	-0.03	A	T	0.18	http://www.ncbi.nlm.nih.gov/sites/entrez?Db=gene&Cmd=ShowDetailView&TermToSearch=729407&ordinalpos=1&itool=EntrezSystem2.PEntrez.Gene.Gene_ResultsPanel.Gene_RVDocSum	LOC729407	LOC729407	175	http://www.ncbi.nlm.nih.gov/sites/entrez?Db=gene&Cmd=ShowDetailView&TermToSearch=3600&ordinalpos=1&itool=EntrezSystem2.PEntrez.Gene.Gene_ResultsPanel.Gene_RVDocSum	IL15	IL15	183	http://www.ncbi.nlm.nih.gov/sites/entrez?Db=gene&Cmd=ShowDetailView&TermToSearch=27309&ordinalpos=1&itool=EntrezSystem2.PEntrez.Gene.Gene_ResultsPanel.Gene_RVDocSum	ZNF330	ZNF330	219	2.3	1.3	0.3	-0.1	0.0016	0.043	0.3	-0.4	-0.4	-0.1	-0.2	0.86	0.18	0.55
http://www.ensembl.org/Homo_sapiens/Variation/Summary?v=rs12510810	rs12510810	rs12510810	4	0.98	0.01	0	0	0.0002	0.33	-0.13	-0.04	A	G	0.18	http://www.ncbi.nlm.nih.gov/sites/entrez?Db=gene&Cmd=ShowDetailView&TermToSearch=729407&ordinalpos=1&itool=EntrezSystem2.PEntrez.Gene.Gene_ResultsPanel.Gene_RVDocSum	LOC729407	LOC729407	176	http://www.ncbi.nlm.nih.gov/sites/entrez?Db=gene&Cmd=ShowDetailView&TermToSearch=3600&ordinalpos=1&itool=EntrezSystem2.PEntrez.Gene.Gene_ResultsPanel.Gene_RVDocSum	IL15	IL15	182	http://www.ncbi.nlm.nih.gov/sites/entrez?Db=gene&Cmd=ShowDetailView&TermToSearch=27309&ordinalpos=1&itool=EntrezSystem2.PEntrez.Gene.Gene_ResultsPanel.Gene_RVDocSum	ZNF330	ZNF330	220	2.2	1.2	0.3	-0.1	0.0021	0.044	0.32	-0.4	-0.4	-0.1	-0.2	0.91	0.17	0.56
http://www.ensembl.org/Homo_sapiens/Variation/Summary?v=rs12509285	rs12509285	rs12509285	4	0.98	0.02	0	0	0.00017	0.33	-0.13	-0.03	C	T	0.18	http://www.ncbi.nlm.nih.gov/sites/entrez?Db=gene&Cmd=ShowDetailView&TermToSearch=729407&ordinalpos=1&itool=EntrezSystem2.PEntrez.Gene.Gene_ResultsPanel.Gene_RVDocSum	LOC729407	LOC729407	177	http://www.ncbi.nlm.nih.gov/sites/entrez?Db=gene&Cmd=ShowDetailView&TermToSearch=3600&ordinalpos=1&itool=EntrezSystem2.PEntrez.Gene.Gene_ResultsPanel.Gene_RVDocSum	IL15	IL15	181	http://www.ncbi.nlm.nih.gov/sites/entrez?Db=gene&Cmd=ShowDetailView&TermToSearch=27309&ordinalpos=1&itool=EntrezSystem2.PEntrez.Gene.Gene_ResultsPanel.Gene_RVDocSum	ZNF330	ZNF330	221	2.3	1.3	0.3	-0.1	0.0016	0.045	0.33	-0.4	-0.4	-0.1	-0.2	0.89	0.17	0.57
http://www.ensembl.org/Homo_sapiens/Variation/Summary?v=rs12511918	rs12511918	rs12511918	4	0.98	0.02	0	0	0.00017	0.33	-0.14	-0.04	A	G	0.18	http://www.ncbi.nlm.nih.gov/sites/entrez?Db=gene&Cmd=ShowDetailView&TermToSearch=729407&ordinalpos=1&itool=EntrezSystem2.PEntrez.Gene.Gene_ResultsPanel.Gene_RVDocSum	LOC729407	LOC729407	177	http://www.ncbi.nlm.nih.gov/sites/entrez?Db=gene&Cmd=ShowDetailView&TermToSearch=3600&ordinalpos=1&itool=EntrezSystem2.PEntrez.Gene.Gene_ResultsPanel.Gene_RVDocSum	IL15	IL15	181	http://www.ncbi.nlm.nih.gov/sites/entrez?Db=gene&Cmd=ShowDetailView&TermToSearch=27309&ordinalpos=1&itool=EntrezSystem2.PEntrez.Gene.Gene_ResultsPanel.Gene_RVDocSum	ZNF330	ZNF330	221	2.3	1.3	0.3	-0.1	0.0016	0.045	0.33	-0.4	-0.4	-0.1	-0.2	0.9	0.17	0.57
http://www.ensembl.org/Homo_sapiens/Variation/Summary?v=rs12508511	rs12508511	rs12508511	4	0.99	0.01	0	0	0.00019	0.31	-0.14	-0.04	G	A	0.17	http://www.ncbi.nlm.nih.gov/sites/entrez?Db=gene&Cmd=ShowDetailView&TermToSearch=729407&ordinalpos=1&itool=EntrezSystem2.PEntrez.Gene.Gene_ResultsPanel.Gene_RVDocSum	LOC729407	LOC729407	177	http://www.ncbi.nlm.nih.gov/sites/entrez?Db=gene&Cmd=ShowDetailView&TermToSearch=3600&ordinalpos=1&itool=EntrezSystem2.PEntrez.Gene.Gene_ResultsPanel.Gene_RVDocSum	IL15	IL15	180	http://www.ncbi.nlm.nih.gov/sites/entrez?Db=gene&Cmd=ShowDetailView&TermToSearch=27309&ordinalpos=1&itool=EntrezSystem2.PEntrez.Gene.Gene_ResultsPanel.Gene_RVDocSum	ZNF330	ZNF330	222	2.2	1.3	0.3	-0.2	0.0016	0.047	0.34	-0.4	-0.4	-0.1	-0.2	0.93	0.16	0.58
http://www.ensembl.org/Homo_sapiens/Variation/Summary?v=rs12511983	rs12511983	rs12511983	4	0.99	0.01	0	0	0.00019	0.31	-0.14	-0.04	A	G	0.17	http://www.ncbi.nlm.nih.gov/sites/entrez?Db=gene&Cmd=ShowDetailView&TermToSearch=729407&ordinalpos=1&itool=EntrezSystem2.PEntrez.Gene.Gene_ResultsPanel.Gene_RVDocSum	LOC729407	LOC729407	177	http://www.ncbi.nlm.nih.gov/sites/entrez?Db=gene&Cmd=ShowDetailView&TermToSearch=3600&ordinalpos=1&itool=EntrezSystem2.PEntrez.Gene.Gene_ResultsPanel.Gene_RVDocSum	IL15	IL15	180	http://www.ncbi.nlm.nih.gov/sites/entrez?Db=gene&Cmd=ShowDetailView&TermToSearch=27309&ordinalpos=1&itool=EntrezSystem2.PEntrez.Gene.Gene_ResultsPanel.Gene_RVDocSum	ZNF330	ZNF330	222	2.2	1.3	0.3	-0.2	0.0016	0.047	0.34	-0.4	-0.4	-0.1	-0.2	0.93	0.16	0.58
http://www.ensembl.org/Homo_sapiens/Variation/Summary?v=rs1521760	rs1521760	rs1521760	4	0.99	0.01	0	0	0.00024	0.3	-0.13	-0.04	A	G	0.17	http://www.ncbi.nlm.nih.gov/sites/entrez?Db=gene&Cmd=ShowDetailView&TermToSearch=3600&ordinalpos=1&itool=EntrezSystem2.PEntrez.Gene.Gene_ResultsPanel.Gene_RVDocSum	IL15	IL15	171	http://www.ncbi.nlm.nih.gov/sites/entrez?Db=gene&Cmd=ShowDetailView&TermToSearch=729407&ordinalpos=1&itool=EntrezSystem2.PEntrez.Gene.Gene_ResultsPanel.Gene_RVDocSum	LOC729407	LOC729407	187	http://www.ncbi.nlm.nih.gov/sites/entrez?Db=gene&Cmd=ShowDetailView&TermToSearch=27309&ordinalpos=1&itool=EntrezSystem2.PEntrez.Gene.Gene_ResultsPanel.Gene_RVDocSum	ZNF330	ZNF330	231	2.1	1.2	0.3	-0.2	0.0021	0.046	0.36	-0.4	-0.4	-0.1	-0.2	0.93	0.16	0.58
http://www.ensembl.org/Homo_sapiens/Variation/Summary?v=rs6825913	rs6825913	rs6825913	4	0.99	0.01	0	0	0.00025	0.3	-0.13	-0.04	T	G	0.16	http://www.ncbi.nlm.nih.gov/sites/entrez?Db=gene&Cmd=ShowDetailView&TermToSearch=3600&ordinalpos=1&itool=EntrezSystem2.PEntrez.Gene.Gene_ResultsPanel.Gene_RVDocSum	IL15	IL15	169	http://www.ncbi.nlm.nih.gov/sites/entrez?Db=gene&Cmd=ShowDetailView&TermToSearch=729407&ordinalpos=1&itool=EntrezSystem2.PEntrez.Gene.Gene_ResultsPanel.Gene_RVDocSum	LOC729407	LOC729407	188	http://www.ncbi.nlm.nih.gov/sites/entrez?Db=gene&Cmd=ShowDetailView&TermToSearch=27309&ordinalpos=1&itool=EntrezSystem2.PEntrez.Gene.Gene_ResultsPanel.Gene_RVDocSum	ZNF330	ZNF330	233	2.1	1.2	0.3	-0.2	0.0022	0.046	0.36	-0.4	-0.4	-0.1	-0.2	0.93	0.16	0.58
http://www.ensembl.org/Homo_sapiens/Variation/Summary?v=rs17354547	rs17354547	rs17354547	4	0.99	0.01	0	0	0.00023	0.32	-0.13	-0.04	C	A	0.17	http://www.ncbi.nlm.nih.gov/sites/entrez?Db=gene&Cmd=ShowDetailView&TermToSearch=3600&ordinalpos=1&itool=EntrezSystem2.PEntrez.Gene.Gene_ResultsPanel.Gene_RVDocSum	IL15	IL15	167	http://www.ncbi.nlm.nih.gov/sites/entrez?Db=gene&Cmd=ShowDetailView&TermToSearch=729407&ordinalpos=1&itool=EntrezSystem2.PEntrez.Gene.Gene_ResultsPanel.Gene_RVDocSum	LOC729407	LOC729407	191	http://www.ncbi.nlm.nih.gov/sites/entrez?Db=gene&Cmd=ShowDetailView&TermToSearch=27309&ordinalpos=1&itool=EntrezSystem2.PEntrez.Gene.Gene_ResultsPanel.Gene_RVDocSum	ZNF330	ZNF330	235	2.1	1.3	0.2	-0.2	0.0017	0.049	0.37	-0.4	-0.4	-0.1	-0.2	0.92	0.17	0.6
http://www.ensembl.org/Homo_sapiens/Variation/Summary?v=rs981843	rs981843	rs981843	4	0.99	0	0	0.01	0.16	6.2e-06	0.04	-0.12	T	C	0.26	http://www.ncbi.nlm.nih.gov/sites/entrez?Db=gene&Cmd=ShowDetailView&TermToSearch=285533&ordinalpos=1&itool=EntrezSystem2.PEntrez.Gene.Gene_ResultsPanel.Gene_RVDocSum	RNF175	RNF175	0	http://www.ncbi.nlm.nih.gov/sites/entrez?Db=gene&Cmd=ShowDetailView&TermToSearch=7097&ordinalpos=1&itool=EntrezSystem2.PEntrez.Gene.Gene_ResultsPanel.Gene_RVDocSum	TLR2	TLR2	25	http://www.ncbi.nlm.nih.gov/sites/entrez?Db=gene&Cmd=ShowDetailView&TermToSearch=6423&ordinalpos=1&itool=EntrezSystem2.PEntrez.Gene.Gene_ResultsPanel.Gene_RVDocSum	SFRP2	SFRP2	50	-0.3	-0.3	-0.3	-0.1	0.3	0.59	0.4	3.3	1.5	0.4	0.4	0.00087	0.024	0.033
http://www.ensembl.org/Homo_sapiens/Variation/Summary?v=rs981844	rs981844	rs981844	4	0.99	0	0	0.01	0.17	6.2e-06	0.04	-0.12	G	A	0.26	http://www.ncbi.nlm.nih.gov/sites/entrez?Db=gene&Cmd=ShowDetailView&TermToSearch=285533&ordinalpos=1&itool=EntrezSystem2.PEntrez.Gene.Gene_ResultsPanel.Gene_RVDocSum	RNF175	RNF175	0	http://www.ncbi.nlm.nih.gov/sites/entrez?Db=gene&Cmd=ShowDetailView&TermToSearch=7097&ordinalpos=1&itool=EntrezSystem2.PEntrez.Gene.Gene_ResultsPanel.Gene_RVDocSum	TLR2	TLR2	25	http://www.ncbi.nlm.nih.gov/sites/entrez?Db=gene&Cmd=ShowDetailView&TermToSearch=6423&ordinalpos=1&itool=EntrezSystem2.PEntrez.Gene.Gene_ResultsPanel.Gene_RVDocSum	SFRP2	SFRP2	50	-0.3	-0.3	-0.3	-0.1	0.3	0.59	0.4	3.3	1.5	0.4	0.4	0.00087	0.024	0.033
http://www.ensembl.org/Homo_sapiens/Variation/Summary?v=rs2579918	rs2579918	rs2579918	4	0.99	0	0	0.01	0.17	6e-06	0.04	-0.12	C	T	0.26	http://www.ncbi.nlm.nih.gov/sites/entrez?Db=gene&Cmd=ShowDetailView&TermToSearch=285533&ordinalpos=1&itool=EntrezSystem2.PEntrez.Gene.Gene_ResultsPanel.Gene_RVDocSum	RNF175	RNF175	0	http://www.ncbi.nlm.nih.gov/sites/entrez?Db=gene&Cmd=ShowDetailView&TermToSearch=7097&ordinalpos=1&itool=EntrezSystem2.PEntrez.Gene.Gene_ResultsPanel.Gene_RVDocSum	TLR2	TLR2	25	http://www.ncbi.nlm.nih.gov/sites/entrez?Db=gene&Cmd=ShowDetailView&TermToSearch=6423&ordinalpos=1&itool=EntrezSystem2.PEntrez.Gene.Gene_ResultsPanel.Gene_RVDocSum	SFRP2	SFRP2	50	-0.3	-0.3	-0.3	-0.1	0.3	0.59	0.4	3.4	1.5	0.4	0.4	0.00086	0.024	0.033
http://www.ensembl.org/Homo_sapiens/Variation/Summary?v=rs2606324	rs2606324	rs2606324	4	0.99	0	0	0.01	0.17	5.1e-06	0.04	-0.12	G	A	0.26	http://www.ncbi.nlm.nih.gov/sites/entrez?Db=gene&Cmd=ShowDetailView&TermToSearch=285533&ordinalpos=1&itool=EntrezSystem2.PEntrez.Gene.Gene_ResultsPanel.Gene_RVDocSum	RNF175	RNF175	0	http://www.ncbi.nlm.nih.gov/sites/entrez?Db=gene&Cmd=ShowDetailView&TermToSearch=7097&ordinalpos=1&itool=EntrezSystem2.PEntrez.Gene.Gene_ResultsPanel.Gene_RVDocSum	TLR2	TLR2	25	http://www.ncbi.nlm.nih.gov/sites/entrez?Db=gene&Cmd=ShowDetailView&TermToSearch=6423&ordinalpos=1&itool=EntrezSystem2.PEntrez.Gene.Gene_ResultsPanel.Gene_RVDocSum	SFRP2	SFRP2	49	-0.3	-0.3	-0.3	-0.1	0.3	0.61	0.41	3.4	1.5	0.5	0.4	0.00086	0.021	0.032
http://www.ensembl.org/Homo_sapiens/Variation/Summary?v=rs2579917	rs2579917	rs2579917	4	0.99	0	0	0.01	0.16	5.4e-06	0.04	-0.12	G	T	0.26	http://www.ncbi.nlm.nih.gov/sites/entrez?Db=gene&Cmd=ShowDetailView&TermToSearch=285533&ordinalpos=1&itool=EntrezSystem2.PEntrez.Gene.Gene_ResultsPanel.Gene_RVDocSum	RNF175	RNF175	0	http://www.ncbi.nlm.nih.gov/sites/entrez?Db=gene&Cmd=ShowDetailView&TermToSearch=7097&ordinalpos=1&itool=EntrezSystem2.PEntrez.Gene.Gene_ResultsPanel.Gene_RVDocSum	TLR2	TLR2	25	http://www.ncbi.nlm.nih.gov/sites/entrez?Db=gene&Cmd=ShowDetailView&TermToSearch=6423&ordinalpos=1&itool=EntrezSystem2.PEntrez.Gene.Gene_ResultsPanel.Gene_RVDocSum	SFRP2	SFRP2	49	-0.3	-0.3	-0.3	-0.1	0.3	0.56	0.39	3.4	1.5	0.4	0.4	0.00086	0.023	0.03
http://www.ensembl.org/Homo_sapiens/Variation/Summary?v=rs2606325	rs2606325	rs2606325	4	0.99	0	0	0.01	0.16	5.5e-06	0.04	-0.12	T	C	0.26	http://www.ncbi.nlm.nih.gov/sites/entrez?Db=gene&Cmd=ShowDetailView&TermToSearch=285533&ordinalpos=1&itool=EntrezSystem2.PEntrez.Gene.Gene_ResultsPanel.Gene_RVDocSum	RNF175	RNF175	0	http://www.ncbi.nlm.nih.gov/sites/entrez?Db=gene&Cmd=ShowDetailView&TermToSearch=7097&ordinalpos=1&itool=EntrezSystem2.PEntrez.Gene.Gene_ResultsPanel.Gene_RVDocSum	TLR2	TLR2	25	http://www.ncbi.nlm.nih.gov/sites/entrez?Db=gene&Cmd=ShowDetailView&TermToSearch=6423&ordinalpos=1&itool=EntrezSystem2.PEntrez.Gene.Gene_ResultsPanel.Gene_RVDocSum	SFRP2	SFRP2	49	-0.3	-0.3	-0.3	-0.1	0.3	0.56	0.39	3.4	1.5	0.4	0.4	0.00087	0.023	0.03
http://www.ensembl.org/Homo_sapiens/Variation/Summary?v=rs2606327	rs2606327	rs2606327	4	0.99	0	0	0.01	0.16	5.5e-06	0.04	-0.12	T	C	0.26	http://www.ncbi.nlm.nih.gov/sites/entrez?Db=gene&Cmd=ShowDetailView&TermToSearch=285533&ordinalpos=1&itool=EntrezSystem2.PEntrez.Gene.Gene_ResultsPanel.Gene_RVDocSum	RNF175	RNF175	0	http://www.ncbi.nlm.nih.gov/sites/entrez?Db=gene&Cmd=ShowDetailView&TermToSearch=7097&ordinalpos=1&itool=EntrezSystem2.PEntrez.Gene.Gene_ResultsPanel.Gene_RVDocSum	TLR2	TLR2	26	http://www.ncbi.nlm.nih.gov/sites/entrez?Db=gene&Cmd=ShowDetailView&TermToSearch=6423&ordinalpos=1&itool=EntrezSystem2.PEntrez.Gene.Gene_ResultsPanel.Gene_RVDocSum	SFRP2	SFRP2	48	-0.3	-0.3	-0.3	-0.1	0.3	0.56	0.39	3.4	1.5	0.4	0.4	0.00087	0.023	0.03
http://www.ensembl.org/Homo_sapiens/Variation/Summary?v=rs2606328	rs2606328	rs2606328	4	0.99	0	0	0.01	0.15	6.2e-06	0.04	-0.13	T	C	0.25	http://www.ncbi.nlm.nih.gov/sites/entrez?Db=gene&Cmd=ShowDetailView&TermToSearch=285533&ordinalpos=1&itool=EntrezSystem2.PEntrez.Gene.Gene_ResultsPanel.Gene_RVDocSum	RNF175	RNF175	0	http://www.ncbi.nlm.nih.gov/sites/entrez?Db=gene&Cmd=ShowDetailView&TermToSearch=7097&ordinalpos=1&itool=EntrezSystem2.PEntrez.Gene.Gene_ResultsPanel.Gene_RVDocSum	TLR2	TLR2	27	http://www.ncbi.nlm.nih.gov/sites/entrez?Db=gene&Cmd=ShowDetailView&TermToSearch=6423&ordinalpos=1&itool=EntrezSystem2.PEntrez.Gene.Gene_ResultsPanel.Gene_RVDocSum	SFRP2	SFRP2	48	-0.2	-0.3	-0.3	-0.1	0.3	0.53	0.38	3.3	1.5	0.4	0.4	0.00089	0.026	0.03
http://www.ensembl.org/Homo_sapiens/Variation/Summary?v=rs2251997	rs2251997	rs2251997	4	0.99	0	0	0.01	0.14	6e-06	0.04	-0.12	T	C	0.26	http://www.ncbi.nlm.nih.gov/sites/entrez?Db=gene&Cmd=ShowDetailView&TermToSearch=285533&ordinalpos=1&itool=EntrezSystem2.PEntrez.Gene.Gene_ResultsPanel.Gene_RVDocSum	RNF175	RNF175	0	http://www.ncbi.nlm.nih.gov/sites/entrez?Db=gene&Cmd=ShowDetailView&TermToSearch=7097&ordinalpos=1&itool=EntrezSystem2.PEntrez.Gene.Gene_ResultsPanel.Gene_RVDocSum	TLR2	TLR2	27	http://www.ncbi.nlm.nih.gov/sites/entrez?Db=gene&Cmd=ShowDetailView&TermToSearch=6423&ordinalpos=1&itool=EntrezSystem2.PEntrez.Gene.Gene_ResultsPanel.Gene_RVDocSum	SFRP2	SFRP2	48	-0.2	-0.3	-0.3	-0.1	0.26	0.58	0.41	3.4	1.5	0.4	0.4	0.00082	0.026	0.031
http://www.ensembl.org/Homo_sapiens/Variation/Summary?v=rs2251994	rs2251994	rs2251994	4	0.99	0	0	0.01	0.14	6.3e-06	0.04	-0.12	T	C	0.26	http://www.ncbi.nlm.nih.gov/sites/entrez?Db=gene&Cmd=ShowDetailView&TermToSearch=285533&ordinalpos=1&itool=EntrezSystem2.PEntrez.Gene.Gene_ResultsPanel.Gene_RVDocSum	RNF175	RNF175	0	http://www.ncbi.nlm.nih.gov/sites/entrez?Db=gene&Cmd=ShowDetailView&TermToSearch=7097&ordinalpos=1&itool=EntrezSystem2.PEntrez.Gene.Gene_ResultsPanel.Gene_RVDocSum	TLR2	TLR2	27	http://www.ncbi.nlm.nih.gov/sites/entrez?Db=gene&Cmd=ShowDetailView&TermToSearch=6423&ordinalpos=1&itool=EntrezSystem2.PEntrez.Gene.Gene_ResultsPanel.Gene_RVDocSum	SFRP2	SFRP2	48	-0.2	-0.3	-0.3	-0.1	0.26	0.58	0.4	3.3	1.5	0.4	0.4	0.00082	0.026	0.033
http://www.ensembl.org/Homo_sapiens/Variation/Summary?v=rs2251900	rs2251900	rs2251900	4	0.99	0	0	0.01	0.14	6.1e-06	0.04	-0.12	T	C	0.26	http://www.ncbi.nlm.nih.gov/sites/entrez?Db=gene&Cmd=ShowDetailView&TermToSearch=285533&ordinalpos=1&itool=EntrezSystem2.PEntrez.Gene.Gene_ResultsPanel.Gene_RVDocSum	RNF175	RNF175	0	http://www.ncbi.nlm.nih.gov/sites/entrez?Db=gene&Cmd=ShowDetailView&TermToSearch=7097&ordinalpos=1&itool=EntrezSystem2.PEntrez.Gene.Gene_ResultsPanel.Gene_RVDocSum	TLR2	TLR2	27	http://www.ncbi.nlm.nih.gov/sites/entrez?Db=gene&Cmd=ShowDetailView&TermToSearch=6423&ordinalpos=1&itool=EntrezSystem2.PEntrez.Gene.Gene_ResultsPanel.Gene_RVDocSum	SFRP2	SFRP2	48	-0.2	-0.3	-0.3	-0.1	0.24	0.58	0.41	3.4	1.5	0.4	0.4	0.00083	0.026	0.031
http://www.ensembl.org/Homo_sapiens/Variation/Summary?v=rs2606329	rs2606329	rs2606329	4	0.99	0	0	0.01	0.13	6.2e-06	0.04	-0.12	C	A	0.26	http://www.ncbi.nlm.nih.gov/sites/entrez?Db=gene&Cmd=ShowDetailView&TermToSearch=285533&ordinalpos=1&itool=EntrezSystem2.PEntrez.Gene.Gene_ResultsPanel.Gene_RVDocSum	RNF175	RNF175	0	http://www.ncbi.nlm.nih.gov/sites/entrez?Db=gene&Cmd=ShowDetailView&TermToSearch=7097&ordinalpos=1&itool=EntrezSystem2.PEntrez.Gene.Gene_ResultsPanel.Gene_RVDocSum	TLR2	TLR2	27	http://www.ncbi.nlm.nih.gov/sites/entrez?Db=gene&Cmd=ShowDetailView&TermToSearch=6423&ordinalpos=1&itool=EntrezSystem2.PEntrez.Gene.Gene_ResultsPanel.Gene_RVDocSum	SFRP2	SFRP2	47	-0.2	-0.3	-0.3	-0.1	0.24	0.58	0.4	3.3	1.5	0.4	0.4	0.00082	0.026	0.034
http://www.ensembl.org/Homo_sapiens/Variation/Summary?v=rs1371161	rs1371161	rs1371161	4	0.99	0	0	0.01	0.15	7.2e-06	0.04	-0.14	C	T	0.29	http://www.ncbi.nlm.nih.gov/sites/entrez?Db=gene&Cmd=ShowDetailView&TermToSearch=285533&ordinalpos=1&itool=EntrezSystem2.PEntrez.Gene.Gene_ResultsPanel.Gene_RVDocSum	RNF175	RNF175	0	http://www.ncbi.nlm.nih.gov/sites/entrez?Db=gene&Cmd=ShowDetailView&TermToSearch=7097&ordinalpos=1&itool=EntrezSystem2.PEntrez.Gene.Gene_ResultsPanel.Gene_RVDocSum	TLR2	TLR2	28	http://www.ncbi.nlm.nih.gov/sites/entrez?Db=gene&Cmd=ShowDetailView&TermToSearch=6423&ordinalpos=1&itool=EntrezSystem2.PEntrez.Gene.Gene_ResultsPanel.Gene_RVDocSum	SFRP2	SFRP2	47	-0.2	-0.3	-0.3	-0.1	0.3	0.51	0.45	3.3	1.5	0.4	0.4	0.00082	0.031	0.031
http://www.ensembl.org/Homo_sapiens/Variation/Summary?v=rs2405431	rs2405431	rs2405431	4	0.99	0	0	0.01	0.13	5.9e-06	0.04	-0.12	G	A	0.25	http://www.ncbi.nlm.nih.gov/sites/entrez?Db=gene&Cmd=ShowDetailView&TermToSearch=285533&ordinalpos=1&itool=EntrezSystem2.PEntrez.Gene.Gene_ResultsPanel.Gene_RVDocSum	RNF175	RNF175	0	http://www.ncbi.nlm.nih.gov/sites/entrez?Db=gene&Cmd=ShowDetailView&TermToSearch=7097&ordinalpos=1&itool=EntrezSystem2.PEntrez.Gene.Gene_ResultsPanel.Gene_RVDocSum	TLR2	TLR2	29	http://www.ncbi.nlm.nih.gov/sites/entrez?Db=gene&Cmd=ShowDetailView&TermToSearch=6423&ordinalpos=1&itool=EntrezSystem2.PEntrez.Gene.Gene_ResultsPanel.Gene_RVDocSum	SFRP2	SFRP2	45	-0.2	-0.3	-0.3	-0.1	0.23	0.58	0.4	3.4	1.6	0.4	0.4	0.00079	0.025	0.034
http://www.ensembl.org/Homo_sapiens/Variation/Summary?v=rs2606335	rs2606335	rs2606335	4	0.99	0	0	0.01	0.13	5.9e-06	0.04	-0.12	C	T	0.25	http://www.ncbi.nlm.nih.gov/sites/entrez?Db=gene&Cmd=ShowDetailView&TermToSearch=285533&ordinalpos=1&itool=EntrezSystem2.PEntrez.Gene.Gene_ResultsPanel.Gene_RVDocSum	RNF175	RNF175	0	http://www.ncbi.nlm.nih.gov/sites/entrez?Db=gene&Cmd=ShowDetailView&TermToSearch=7097&ordinalpos=1&itool=EntrezSystem2.PEntrez.Gene.Gene_ResultsPanel.Gene_RVDocSum	TLR2	TLR2	29	http://www.ncbi.nlm.nih.gov/sites/entrez?Db=gene&Cmd=ShowDetailView&TermToSearch=6423&ordinalpos=1&itool=EntrezSystem2.PEntrez.Gene.Gene_ResultsPanel.Gene_RVDocSum	SFRP2	SFRP2	45	-0.2	-0.3	-0.3	-0.1	0.23	0.57	0.4	3.4	1.6	0.4	0.4	0.00079	0.025	0.034
http://www.ensembl.org/Homo_sapiens/Variation/Summary?v=rs2606337	rs2606337	rs2606337	4	0.98	0	0	0.01	0.13	4.9e-06	0.04	-0.13	T	C	0.26	http://www.ncbi.nlm.nih.gov/sites/entrez?Db=gene&Cmd=ShowDetailView&TermToSearch=285533&ordinalpos=1&itool=EntrezSystem2.PEntrez.Gene.Gene_ResultsPanel.Gene_RVDocSum	RNF175	RNF175	0	http://www.ncbi.nlm.nih.gov/sites/entrez?Db=gene&Cmd=ShowDetailView&TermToSearch=7097&ordinalpos=1&itool=EntrezSystem2.PEntrez.Gene.Gene_ResultsPanel.Gene_RVDocSum	TLR2	TLR2	30	http://www.ncbi.nlm.nih.gov/sites/entrez?Db=gene&Cmd=ShowDetailView&TermToSearch=6423&ordinalpos=1&itool=EntrezSystem2.PEntrez.Gene.Gene_ResultsPanel.Gene_RVDocSum	SFRP2	SFRP2	45	-0.2	-0.2	-0.3	-0.1	0.23	0.56	0.45	3.4	1.6	0.4	0.4	0.00079	0.023	0.03
http://www.ensembl.org/Homo_sapiens/Variation/Summary?v=rs2263434	rs2263434	rs2263434	4	0.99	0	0	0.01	0.13	5.8e-06	0.04	-0.12	G	A	0.25	http://www.ncbi.nlm.nih.gov/sites/entrez?Db=gene&Cmd=ShowDetailView&TermToSearch=285533&ordinalpos=1&itool=EntrezSystem2.PEntrez.Gene.Gene_ResultsPanel.Gene_RVDocSum	RNF175	RNF175	0	http://www.ncbi.nlm.nih.gov/sites/entrez?Db=gene&Cmd=ShowDetailView&TermToSearch=7097&ordinalpos=1&itool=EntrezSystem2.PEntrez.Gene.Gene_ResultsPanel.Gene_RVDocSum	TLR2	TLR2	31	http://www.ncbi.nlm.nih.gov/sites/entrez?Db=gene&Cmd=ShowDetailView&TermToSearch=6423&ordinalpos=1&itool=EntrezSystem2.PEntrez.Gene.Gene_ResultsPanel.Gene_RVDocSum	SFRP2	SFRP2	43	-0.2	-0.3	-0.3	-0.1	0.22	0.57	0.41	3.4	1.6	0.4	0.4	0.00079	0.025	0.034
http://www.ensembl.org/Homo_sapiens/Variation/Summary?v=rs2606341	rs2606341	rs2606341	4	0.99	0	0	0.01	0.13	5.8e-06	0.04	-0.12	C	T	0.25	http://www.ncbi.nlm.nih.gov/sites/entrez?Db=gene&Cmd=ShowDetailView&TermToSearch=285533&ordinalpos=1&itool=EntrezSystem2.PEntrez.Gene.Gene_ResultsPanel.Gene_RVDocSum	RNF175	RNF175	0	http://www.ncbi.nlm.nih.gov/sites/entrez?Db=gene&Cmd=ShowDetailView&TermToSearch=7097&ordinalpos=1&itool=EntrezSystem2.PEntrez.Gene.Gene_ResultsPanel.Gene_RVDocSum	TLR2	TLR2	31	http://www.ncbi.nlm.nih.gov/sites/entrez?Db=gene&Cmd=ShowDetailView&TermToSearch=6423&ordinalpos=1&itool=EntrezSystem2.PEntrez.Gene.Gene_ResultsPanel.Gene_RVDocSum	SFRP2	SFRP2	43	-0.2	-0.3	-0.3	-0.1	0.22	0.57	0.41	3.4	1.6	0.4	0.4	0.00079	0.025	0.035
http://www.ensembl.org/Homo_sapiens/Variation/Summary?v=rs17298985	rs17298985	rs17298985	4	0.98	0	0	0.02	0.14	4.1e-06	0.04	-0.12	T	C	0.25	http://www.ncbi.nlm.nih.gov/sites/entrez?Db=gene&Cmd=ShowDetailView&TermToSearch=285533&ordinalpos=1&itool=EntrezSystem2.PEntrez.Gene.Gene_ResultsPanel.Gene_RVDocSum	RNF175	RNF175	0	http://www.ncbi.nlm.nih.gov/sites/entrez?Db=gene&Cmd=ShowDetailView&TermToSearch=7097&ordinalpos=1&itool=EntrezSystem2.PEntrez.Gene.Gene_ResultsPanel.Gene_RVDocSum	TLR2	TLR2	37	http://www.ncbi.nlm.nih.gov/sites/entrez?Db=gene&Cmd=ShowDetailView&TermToSearch=6423&ordinalpos=1&itool=EntrezSystem2.PEntrez.Gene.Gene_ResultsPanel.Gene_RVDocSum	SFRP2	SFRP2	37	-0.3	-0.3	-0.3	-0.1	0.24	0.57	0.45	3.5	1.7	0.4	0.4	0.00054	0.024	0.035
http://www.ensembl.org/Homo_sapiens/Variation/Summary?v=rs17371021	rs17371021	rs17371021	4	0.98	0	0	0.02	0.14	4.1e-06	0.04	-0.12	A	G	0.25	http://www.ncbi.nlm.nih.gov/sites/entrez?Db=gene&Cmd=ShowDetailView&TermToSearch=285533&ordinalpos=1&itool=EntrezSystem2.PEntrez.Gene.Gene_ResultsPanel.Gene_RVDocSum	RNF175	RNF175	0	http://www.ncbi.nlm.nih.gov/sites/entrez?Db=gene&Cmd=ShowDetailView&TermToSearch=7097&ordinalpos=1&itool=EntrezSystem2.PEntrez.Gene.Gene_ResultsPanel.Gene_RVDocSum	TLR2	TLR2	37	http://www.ncbi.nlm.nih.gov/sites/entrez?Db=gene&Cmd=ShowDetailView&TermToSearch=6423&ordinalpos=1&itool=EntrezSystem2.PEntrez.Gene.Gene_ResultsPanel.Gene_RVDocSum	SFRP2	SFRP2	37	-0.3	-0.3	-0.3	-0.1	0.24	0.57	0.48	3.5	1.7	0.4	0.4	0.00054	0.024	0.036
http://www.ensembl.org/Homo_sapiens/Variation/Summary?v=rs10517579	rs10517579	rs10517579	4	0.98	0	0	0.01	0.15	4.5e-06	0.04	-0.12	C	T	0.25	http://www.ncbi.nlm.nih.gov/sites/entrez?Db=gene&Cmd=ShowDetailView&TermToSearch=285533&ordinalpos=1&itool=EntrezSystem2.PEntrez.Gene.Gene_ResultsPanel.Gene_RVDocSum	RNF175	RNF175	0	http://www.ncbi.nlm.nih.gov/sites/entrez?Db=gene&Cmd=ShowDetailView&TermToSearch=6423&ordinalpos=1&itool=EntrezSystem2.PEntrez.Gene.Gene_ResultsPanel.Gene_RVDocSum	SFRP2	SFRP2	35	http://www.ncbi.nlm.nih.gov/sites/entrez?Db=gene&Cmd=ShowDetailView&TermToSearch=7097&ordinalpos=1&itool=EntrezSystem2.PEntrez.Gene.Gene_ResultsPanel.Gene_RVDocSum	TLR2	TLR2	39	-0.3	-0.3	-0.3	-0.2	0.23	0.57	0.53	3.5	1.7	0.4	0.4	0.00055	0.023	0.041
http://www.ensembl.org/Homo_sapiens/Variation/Summary?v=rs17299034	rs17299034	rs17299034	4	0.98	0	0	0.02	0.11	5.2e-06	0.04	-0.13	G	A	0.24	http://www.ncbi.nlm.nih.gov/sites/entrez?Db=gene&Cmd=ShowDetailView&TermToSearch=285533&ordinalpos=1&itool=EntrezSystem2.PEntrez.Gene.Gene_ResultsPanel.Gene_RVDocSum	RNF175	RNF175	0	http://www.ncbi.nlm.nih.gov/sites/entrez?Db=gene&Cmd=ShowDetailView&TermToSearch=6423&ordinalpos=1&itool=EntrezSystem2.PEntrez.Gene.Gene_ResultsPanel.Gene_RVDocSum	SFRP2	SFRP2	30	http://www.ncbi.nlm.nih.gov/sites/entrez?Db=gene&Cmd=ShowDetailView&TermToSearch=7097&ordinalpos=1&itool=EntrezSystem2.PEntrez.Gene.Gene_ResultsPanel.Gene_RVDocSum	TLR2	TLR2	44	-0.2	-0.2	-0.3	-0.1	0.21	0.47	0.5	3.4	1.6	0.4	0.4	0.00067	0.025	0.037
http://www.ensembl.org/Homo_sapiens/Variation/Summary?v=rs17299041	rs17299041	rs17299041	4	0.98	0	0	0.01	0.11	5.5e-06	0.04	-0.13	C	T	0.24	http://www.ncbi.nlm.nih.gov/sites/entrez?Db=gene&Cmd=ShowDetailView&TermToSearch=285533&ordinalpos=1&itool=EntrezSystem2.PEntrez.Gene.Gene_ResultsPanel.Gene_RVDocSum	RNF175	RNF175	0	http://www.ncbi.nlm.nih.gov/sites/entrez?Db=gene&Cmd=ShowDetailView&TermToSearch=6423&ordinalpos=1&itool=EntrezSystem2.PEntrez.Gene.Gene_ResultsPanel.Gene_RVDocSum	SFRP2	SFRP2	29	http://www.ncbi.nlm.nih.gov/sites/entrez?Db=gene&Cmd=ShowDetailView&TermToSearch=7097&ordinalpos=1&itool=EntrezSystem2.PEntrez.Gene.Gene_ResultsPanel.Gene_RVDocSum	TLR2	TLR2	46	-0.2	-0.2	-0.3	-0.1	0.21	0.46	0.49	3.4	1.6	0.4	0.4	0.00068	0.026	0.036
http://www.ensembl.org/Homo_sapiens/Variation/Summary?v=rs17030437	rs17030437	rs17030437	4	0.96	0	0	0.04	0.044	5.6e-06	0.06	-0.14	A	C	0.29	http://www.ncbi.nlm.nih.gov/sites/entrez?Db=gene&Cmd=ShowDetailView&TermToSearch=6423&ordinalpos=1&itool=EntrezSystem2.PEntrez.Gene.Gene_ResultsPanel.Gene_RVDocSum	SFRP2	SFRP2	0	http://www.ncbi.nlm.nih.gov/sites/entrez?Db=gene&Cmd=ShowDetailView&TermToSearch=285533&ordinalpos=1&itool=EntrezSystem2.PEntrez.Gene.Gene_ResultsPanel.Gene_RVDocSum	RNF175	RNF175	23	http://www.ncbi.nlm.nih.gov/sites/entrez?Db=gene&Cmd=ShowDetailView&TermToSearch=7097&ordinalpos=1&itool=EntrezSystem2.PEntrez.Gene.Gene_ResultsPanel.Gene_RVDocSum	TLR2	TLR2	77	0.2	-0.1	-0.2	0	0.15	0.33	0.27	3.4	1.7	0.4	0.3	0.0005	0.031	0.034
http://www.ensembl.org/Homo_sapiens/Variation/Summary?v=rs1470410	rs1470410	rs1470410	4	0.98	0.02	0	0	0.00012	0.73	-0.1	0.01	C	T	0.31	http://www.ncbi.nlm.nih.gov/sites/entrez?Db=gene&Cmd=ShowDetailView&TermToSearch=11199&ordinalpos=1&itool=EntrezSystem2.PEntrez.Gene.Gene_ResultsPanel.Gene_RVDocSum	ANXA10	ANXA10	148	http://www.ncbi.nlm.nih.gov/sites/entrez?Db=gene&Cmd=ShowDetailView&TermToSearch=55601&ordinalpos=1&itool=EntrezSystem2.PEntrez.Gene.Gene_ResultsPanel.Gene_RVDocSum	FLJ20035	FLJ20035	271	http://www.ncbi.nlm.nih.gov/sites/entrez?Db=gene&Cmd=ShowDetailView&TermToSearch=91351&ordinalpos=1&itool=EntrezSystem2.PEntrez.Gene.Gene_ResultsPanel.Gene_RVDocSum	FLJ31033	FLJ31033	412	2.3	1.1	0.7	-0.2	0.0031	0.012	0.48	-0.7	-0.5	-0.5	-0.3	0.5	0.88	0.92
http://www.ensembl.org/Homo_sapiens/Variation/Summary?v=rs304361	rs304361	rs304361	4	0.98	0.02	0	0	0.00013	0.73	-0.1	0.01	G	T	0.31	http://www.ncbi.nlm.nih.gov/sites/entrez?Db=gene&Cmd=ShowDetailView&TermToSearch=11199&ordinalpos=1&itool=EntrezSystem2.PEntrez.Gene.Gene_ResultsPanel.Gene_RVDocSum	ANXA10	ANXA10	139	http://www.ncbi.nlm.nih.gov/sites/entrez?Db=gene&Cmd=ShowDetailView&TermToSearch=55601&ordinalpos=1&itool=EntrezSystem2.PEntrez.Gene.Gene_ResultsPanel.Gene_RVDocSum	FLJ20035	FLJ20035	262	http://www.ncbi.nlm.nih.gov/sites/entrez?Db=gene&Cmd=ShowDetailView&TermToSearch=91351&ordinalpos=1&itool=EntrezSystem2.PEntrez.Gene.Gene_ResultsPanel.Gene_RVDocSum	FLJ31033	FLJ31033	403	2.3	1.1	0.7	-0.3	0.003	0.013	0.48	-0.7	-0.5	-0.5	-0.3	0.5	0.88	0.92
http://www.ensembl.org/Homo_sapiens/Variation/Summary?v=rs304339	rs304339	rs304339	4	0.98	0.02	0	0	0.00013	0.73	-0.1	0.01	A	T	0.31	http://www.ncbi.nlm.nih.gov/sites/entrez?Db=gene&Cmd=ShowDetailView&TermToSearch=11199&ordinalpos=1&itool=EntrezSystem2.PEntrez.Gene.Gene_ResultsPanel.Gene_RVDocSum	ANXA10	ANXA10	122	http://www.ncbi.nlm.nih.gov/sites/entrez?Db=gene&Cmd=ShowDetailView&TermToSearch=55601&ordinalpos=1&itool=EntrezSystem2.PEntrez.Gene.Gene_ResultsPanel.Gene_RVDocSum	FLJ20035	FLJ20035	246	http://www.ncbi.nlm.nih.gov/sites/entrez?Db=gene&Cmd=ShowDetailView&TermToSearch=91351&ordinalpos=1&itool=EntrezSystem2.PEntrez.Gene.Gene_ResultsPanel.Gene_RVDocSum	FLJ31033	FLJ31033	386	2.3	1	0.7	-0.2	0.0032	0.013	0.48	-0.7	-0.5	-0.5	-0.3	0.5	0.87	0.91
http://www.ensembl.org/Homo_sapiens/Variation/Summary?v=rs13112514	rs13112514	rs13112514	4	0.98	0.02	0	0	0.0001	0.82	-0.1	0.01	C	A	0.32	http://www.ncbi.nlm.nih.gov/sites/entrez?Db=gene&Cmd=ShowDetailView&TermToSearch=11199&ordinalpos=1&itool=EntrezSystem2.PEntrez.Gene.Gene_ResultsPanel.Gene_RVDocSum	ANXA10	ANXA10	102	http://www.ncbi.nlm.nih.gov/sites/entrez?Db=gene&Cmd=ShowDetailView&TermToSearch=55601&ordinalpos=1&itool=EntrezSystem2.PEntrez.Gene.Gene_ResultsPanel.Gene_RVDocSum	FLJ20035	FLJ20035	226	http://www.ncbi.nlm.nih.gov/sites/entrez?Db=gene&Cmd=ShowDetailView&TermToSearch=91351&ordinalpos=1&itool=EntrezSystem2.PEntrez.Gene.Gene_ResultsPanel.Gene_RVDocSum	FLJ31033	FLJ31033	366	2.4	1.1	0.7	-0.2	0.003	0.011	0.45	-0.7	-0.5	-0.5	-0.3	0.49	0.79	0.76
http://www.ensembl.org/Homo_sapiens/Variation/Summary?v=rs7692695	rs7692695	rs7692695	4	0.98	0.02	0	0	0.00013	0.78	-0.1	0.01	T	G	0.32	http://www.ncbi.nlm.nih.gov/sites/entrez?Db=gene&Cmd=ShowDetailView&TermToSearch=11199&ordinalpos=1&itool=EntrezSystem2.PEntrez.Gene.Gene_ResultsPanel.Gene_RVDocSum	ANXA10	ANXA10	97	http://www.ncbi.nlm.nih.gov/sites/entrez?Db=gene&Cmd=ShowDetailView&TermToSearch=55601&ordinalpos=1&itool=EntrezSystem2.PEntrez.Gene.Gene_ResultsPanel.Gene_RVDocSum	FLJ20035	FLJ20035	220	http://www.ncbi.nlm.nih.gov/sites/entrez?Db=gene&Cmd=ShowDetailView&TermToSearch=91351&ordinalpos=1&itool=EntrezSystem2.PEntrez.Gene.Gene_ResultsPanel.Gene_RVDocSum	FLJ31033	FLJ31033	361	2.3	1	0.6	-0.2	0.0031	0.014	0.46	-0.7	-0.5	-0.5	-0.3	0.49	0.86	0.76
http://www.ensembl.org/Homo_sapiens/Variation/Summary?v=rs4259026	rs4259026	rs4259026	4	0.98	0.02	0	0	0.00013	0.62	-0.1	0.01	C	T	0.32	http://www.ncbi.nlm.nih.gov/sites/entrez?Db=gene&Cmd=ShowDetailView&TermToSearch=11199&ordinalpos=1&itool=EntrezSystem2.PEntrez.Gene.Gene_ResultsPanel.Gene_RVDocSum	ANXA10	ANXA10	63	http://www.ncbi.nlm.nih.gov/sites/entrez?Db=gene&Cmd=ShowDetailView&TermToSearch=55601&ordinalpos=1&itool=EntrezSystem2.PEntrez.Gene.Gene_ResultsPanel.Gene_RVDocSum	FLJ20035	FLJ20035	187	http://www.ncbi.nlm.nih.gov/sites/entrez?Db=gene&Cmd=ShowDetailView&TermToSearch=91351&ordinalpos=1&itool=EntrezSystem2.PEntrez.Gene.Gene_ResultsPanel.Gene_RVDocSum	FLJ31033	FLJ31033	327	2.3	1.1	0.7	-0.3	0.0026	0.011	0.62	-0.6	-0.4	-0.4	-0.3	0.48	0.78	0.64
http://www.ensembl.org/Homo_sapiens/Variation/Summary?v=rs12648231	rs12648231	rs12648231	4	0.98	0.01	0	0	0.00025	0.94	-0.16	0	A	G	0.12	http://www.ncbi.nlm.nih.gov/sites/entrez?Db=gene&Cmd=ShowDetailView&TermToSearch=55247&ordinalpos=1&itool=EntrezSystem2.PEntrez.Gene.Gene_ResultsPanel.Gene_RVDocSum	NEIL3	NEIL3	0	http://www.ncbi.nlm.nih.gov/sites/entrez?Db=gene&Cmd=ShowDetailView&TermToSearch=175&ordinalpos=1&itool=EntrezSystem2.PEntrez.Gene.Gene_ResultsPanel.Gene_RVDocSum	AGA	AGA	118	http://www.ncbi.nlm.nih.gov/sites/entrez?Db=gene&Cmd=ShowDetailView&TermToSearch=285501&ordinalpos=1&itool=EntrezSystem2.PEntrez.Gene.Gene_ResultsPanel.Gene_RVDocSum	LOC285501	LOC285501	416	2.2	1.7	0	-0.1	0.00073	0.18	0.49	-0.5	-0.4	-0.1	0.2	0.92	0.39	0.07
http://www.ensembl.org/Homo_sapiens/Variation/Summary?v=rs17064641	rs17064641	rs17064641	4	0.98	0.02	0	0	0.00027	0.93	-0.13	0	C	T	0.13	http://www.ncbi.nlm.nih.gov/sites/entrez?Db=gene&Cmd=ShowDetailView&TermToSearch=55247&ordinalpos=1&itool=EntrezSystem2.PEntrez.Gene.Gene_ResultsPanel.Gene_RVDocSum	NEIL3	NEIL3	0	http://www.ncbi.nlm.nih.gov/sites/entrez?Db=gene&Cmd=ShowDetailView&TermToSearch=175&ordinalpos=1&itool=EntrezSystem2.PEntrez.Gene.Gene_ResultsPanel.Gene_RVDocSum	AGA	AGA	106	http://www.ncbi.nlm.nih.gov/sites/entrez?Db=gene&Cmd=ShowDetailView&TermToSearch=285501&ordinalpos=1&itool=EntrezSystem2.PEntrez.Gene.Gene_ResultsPanel.Gene_RVDocSum	LOC285501	LOC285501	403	2.2	2	0.1	-0.2	0.00034	0.19	0.46	-0.5	-0.4	-0.1	0	0.93	0.2	0.14
http://www.ensembl.org/Homo_sapiens/Variation/Summary?v=rs9994906	rs9994906	rs9994906	4	0.98	0.02	0	0	0.00025	0.94	-0.13	0	T	C	0.13	http://www.ncbi.nlm.nih.gov/sites/entrez?Db=gene&Cmd=ShowDetailView&TermToSearch=55247&ordinalpos=1&itool=EntrezSystem2.PEntrez.Gene.Gene_ResultsPanel.Gene_RVDocSum	NEIL3	NEIL3	0	http://www.ncbi.nlm.nih.gov/sites/entrez?Db=gene&Cmd=ShowDetailView&TermToSearch=175&ordinalpos=1&itool=EntrezSystem2.PEntrez.Gene.Gene_ResultsPanel.Gene_RVDocSum	AGA	AGA	102	http://www.ncbi.nlm.nih.gov/sites/entrez?Db=gene&Cmd=ShowDetailView&TermToSearch=285501&ordinalpos=1&itool=EntrezSystem2.PEntrez.Gene.Gene_ResultsPanel.Gene_RVDocSum	LOC285501	LOC285501	400	2.3	2	0.1	-0.2	0.00033	0.19	0.45	-0.6	-0.4	-0.1	0	0.92	0.21	0.14
http://www.ensembl.org/Homo_sapiens/Variation/Summary?v=rs7663521	rs7663521	rs7663521	4	0.98	0.02	0	0	0.00022	0.91	-0.14	0	T	C	0.13	http://www.ncbi.nlm.nih.gov/sites/entrez?Db=gene&Cmd=ShowDetailView&TermToSearch=55247&ordinalpos=1&itool=EntrezSystem2.PEntrez.Gene.Gene_ResultsPanel.Gene_RVDocSum	NEIL3	NEIL3	0	http://www.ncbi.nlm.nih.gov/sites/entrez?Db=gene&Cmd=ShowDetailView&TermToSearch=175&ordinalpos=1&itool=EntrezSystem2.PEntrez.Gene.Gene_ResultsPanel.Gene_RVDocSum	AGA	AGA	99	http://www.ncbi.nlm.nih.gov/sites/entrez?Db=gene&Cmd=ShowDetailView&TermToSearch=285501&ordinalpos=1&itool=EntrezSystem2.PEntrez.Gene.Gene_ResultsPanel.Gene_RVDocSum	LOC285501	LOC285501	397	2.3	2	0.1	-0.1	0.00035	0.17	0.45	-0.5	-0.4	-0.1	0	0.9	0.2	0.18
http://www.ensembl.org/Homo_sapiens/Variation/Summary?v=rs7689099	rs7689099	rs7689099	4	0.97	0.03	0	0	0.00016	0.92	-0.14	0	G	C	0.12	http://www.ncbi.nlm.nih.gov/sites/entrez?Db=gene&Cmd=ShowDetailView&TermToSearch=55247&ordinalpos=1&itool=EntrezSystem2.PEntrez.Gene.Gene_ResultsPanel.Gene_RVDocSum	NEIL3	NEIL3	0	http://www.ncbi.nlm.nih.gov/sites/entrez?Db=gene&Cmd=ShowDetailView&TermToSearch=175&ordinalpos=1&itool=EntrezSystem2.PEntrez.Gene.Gene_ResultsPanel.Gene_RVDocSum	AGA	AGA	95	http://www.ncbi.nlm.nih.gov/sites/entrez?Db=gene&Cmd=ShowDetailView&TermToSearch=285501&ordinalpos=1&itool=EntrezSystem2.PEntrez.Gene.Gene_ResultsPanel.Gene_RVDocSum	LOC285501	LOC285501	393	2.5	2.2	0.1	-0.2	0.00021	0.19	0.5	-0.5	-0.4	-0.1	0	0.94	0.2	0.15
http://www.ensembl.org/Homo_sapiens/Variation/Summary?v=rs17064661	rs17064661	rs17064661	4	0.98	0.02	0	0	0.00029	0.99	-0.12	0	T	C	0.13	http://www.ncbi.nlm.nih.gov/sites/entrez?Db=gene&Cmd=ShowDetailView&TermToSearch=55247&ordinalpos=1&itool=EntrezSystem2.PEntrez.Gene.Gene_ResultsPanel.Gene_RVDocSum	NEIL3	NEIL3	0	http://www.ncbi.nlm.nih.gov/sites/entrez?Db=gene&Cmd=ShowDetailView&TermToSearch=175&ordinalpos=1&itool=EntrezSystem2.PEntrez.Gene.Gene_ResultsPanel.Gene_RVDocSum	AGA	AGA	92	http://www.ncbi.nlm.nih.gov/sites/entrez?Db=gene&Cmd=ShowDetailView&TermToSearch=285501&ordinalpos=1&itool=EntrezSystem2.PEntrez.Gene.Gene_ResultsPanel.Gene_RVDocSum	LOC285501	LOC285501	390	2.2	2	0.1	-0.2	0.00032	0.18	0.46	-0.6	-0.4	-0.2	0	0.91	0.25	0.14
http://www.ensembl.org/Homo_sapiens/Variation/Summary?v=rs6824106	rs6824106	rs6824106	4	0.99	0	0	0.01	0.31	0.00058	-0.02	-0.08	G	A	0.38	http://www.ncbi.nlm.nih.gov/sites/entrez?Db=gene&Cmd=ShowDetailView&TermToSearch=285501&ordinalpos=1&itool=EntrezSystem2.PEntrez.Gene.Gene_ResultsPanel.Gene_RVDocSum	LOC285501	LOC285501	0	http://www.ncbi.nlm.nih.gov/sites/entrez?Db=gene&Cmd=ShowDetailView&TermToSearch=391719&ordinalpos=1&itool=EntrezSystem2.PEntrez.Gene.Gene_ResultsPanel.Gene_RVDocSum	LOC391719	LOC391719	407	http://www.ncbi.nlm.nih.gov/sites/entrez?Db=gene&Cmd=ShowDetailView&TermToSearch=175&ordinalpos=1&itool=EntrezSystem2.PEntrez.Gene.Gene_ResultsPanel.Gene_RVDocSum	AGA	AGA	437	-0.5	-0.6	-0.5	-0.1	0.69	0.61	0.26	3.5	2.5	-0.4	0.9	0.0054	0.56	0.0045
http://www.ensembl.org/Homo_sapiens/Variation/Summary?v=rs10520386	rs10520386	rs10520386	4	0.99	0	0	0.01	0.31	0.00061	-0.02	-0.08	C	G	0.38	http://www.ncbi.nlm.nih.gov/sites/entrez?Db=gene&Cmd=ShowDetailView&TermToSearch=285501&ordinalpos=1&itool=EntrezSystem2.PEntrez.Gene.Gene_ResultsPanel.Gene_RVDocSum	LOC285501	LOC285501	0	http://www.ncbi.nlm.nih.gov/sites/entrez?Db=gene&Cmd=ShowDetailView&TermToSearch=391719&ordinalpos=1&itool=EntrezSystem2.PEntrez.Gene.Gene_ResultsPanel.Gene_RVDocSum	LOC391719	LOC391719	404	http://www.ncbi.nlm.nih.gov/sites/entrez?Db=gene&Cmd=ShowDetailView&TermToSearch=175&ordinalpos=1&itool=EntrezSystem2.PEntrez.Gene.Gene_ResultsPanel.Gene_RVDocSum	AGA	AGA	440	-0.5	-0.6	-0.5	-0.1	0.71	0.6	0.25	3.6	2.6	-0.4	0.9	0.0055	0.56	0.005
http://www.ensembl.org/Homo_sapiens/Variation/Summary?v=rs6850538	rs6850538	rs6850538	4	0.99	0	0	0.01	0.27	0.00054	-0.03	-0.08	C	T	0.38	http://www.ncbi.nlm.nih.gov/sites/entrez?Db=gene&Cmd=ShowDetailView&TermToSearch=285501&ordinalpos=1&itool=EntrezSystem2.PEntrez.Gene.Gene_ResultsPanel.Gene_RVDocSum	LOC285501	LOC285501	0	http://www.ncbi.nlm.nih.gov/sites/entrez?Db=gene&Cmd=ShowDetailView&TermToSearch=391719&ordinalpos=1&itool=EntrezSystem2.PEntrez.Gene.Gene_ResultsPanel.Gene_RVDocSum	LOC391719	LOC391719	403	http://www.ncbi.nlm.nih.gov/sites/entrez?Db=gene&Cmd=ShowDetailView&TermToSearch=175&ordinalpos=1&itool=EntrezSystem2.PEntrez.Gene.Gene_ResultsPanel.Gene_RVDocSum	AGA	AGA	441	-0.5	-0.6	-0.5	-0.1	0.68	0.57	0.23	3.6	2.6	-0.4	0.9	0.0048	0.55	0.0049
http://www.ensembl.org/Homo_sapiens/Variation/Summary?v=rs12648897	rs12648897	rs12648897	4	0.98	0	0.01	0.02	0.27	0.00039	-0.03	-0.08	G	A	0.39	http://www.ncbi.nlm.nih.gov/sites/entrez?Db=gene&Cmd=ShowDetailView&TermToSearch=285501&ordinalpos=1&itool=EntrezSystem2.PEntrez.Gene.Gene_ResultsPanel.Gene_RVDocSum	LOC285501	LOC285501	0	http://www.ncbi.nlm.nih.gov/sites/entrez?Db=gene&Cmd=ShowDetailView&TermToSearch=391719&ordinalpos=1&itool=EntrezSystem2.PEntrez.Gene.Gene_ResultsPanel.Gene_RVDocSum	LOC391719	LOC391719	401	http://www.ncbi.nlm.nih.gov/sites/entrez?Db=gene&Cmd=ShowDetailView&TermToSearch=175&ordinalpos=1&itool=EntrezSystem2.PEntrez.Gene.Gene_ResultsPanel.Gene_RVDocSum	AGA	AGA	443	-0.5	-0.6	-0.5	-0.1	0.61	0.6	0.25	3.8	2.7	-0.4	0.9	0.0034	0.56	0.0049
http://www.ensembl.org/Homo_sapiens/Variation/Summary?v=rs4530677	rs4530677	rs4530677	4	0.99	0.01	0	0	0.00018	0.044	-0.11	0.06	T	C	0.2	http://www.ncbi.nlm.nih.gov/sites/entrez?Db=gene&Cmd=ShowDetailView&TermToSearch=391719&ordinalpos=1&itool=EntrezSystem2.PEntrez.Gene.Gene_ResultsPanel.Gene_RVDocSum	LOC391719	LOC391719	319	http://www.ncbi.nlm.nih.gov/sites/entrez?Db=gene&Cmd=ShowDetailView&TermToSearch=285501&ordinalpos=1&itool=EntrezSystem2.PEntrez.Gene.Gene_ResultsPanel.Gene_RVDocSum	LOC285501	LOC285501	616	http://www.ncbi.nlm.nih.gov/sites/entrez?Db=gene&Cmd=ShowDetailView&TermToSearch=NA&ordinalpos=1&itool=EntrezSystem2.PEntrez.Gene.Gene_ResultsPanel.Gene_RVDocSum	NA	NA	NA	2.1	0.4	0.9	0.1	0.028	0.0057	0.13	0.2	-0.4	0.7	0	0.98	0.011	0.11
http://www.ensembl.org/Homo_sapiens/Variation/Summary?v=rs1434035	rs1434035	rs1434035	4	0.98	0.01	0	0	0.00013	0.044	-0.11	0.06	T	C	0.2	http://www.ncbi.nlm.nih.gov/sites/entrez?Db=gene&Cmd=ShowDetailView&TermToSearch=391719&ordinalpos=1&itool=EntrezSystem2.PEntrez.Gene.Gene_ResultsPanel.Gene_RVDocSum	LOC391719	LOC391719	322	http://www.ncbi.nlm.nih.gov/sites/entrez?Db=gene&Cmd=ShowDetailView&TermToSearch=285501&ordinalpos=1&itool=EntrezSystem2.PEntrez.Gene.Gene_ResultsPanel.Gene_RVDocSum	LOC285501	LOC285501	619	http://www.ncbi.nlm.nih.gov/sites/entrez?Db=gene&Cmd=ShowDetailView&TermToSearch=NA&ordinalpos=1&itool=EntrezSystem2.PEntrez.Gene.Gene_ResultsPanel.Gene_RVDocSum	NA	NA	NA	2.2	0.4	0.9	0.1	0.026	0.0047	0.12	0.2	-0.4	0.6	0	0.99	0.012	0.15
http://www.ensembl.org/Homo_sapiens/Variation/Summary?v=rs1434034	rs1434034	rs1434034	4	0.99	0.01	0	0	0.00019	0.055	-0.11	0.06	T	C	0.2	http://www.ncbi.nlm.nih.gov/sites/entrez?Db=gene&Cmd=ShowDetailView&TermToSearch=391719&ordinalpos=1&itool=EntrezSystem2.PEntrez.Gene.Gene_ResultsPanel.Gene_RVDocSum	LOC391719	LOC391719	326	http://www.ncbi.nlm.nih.gov/sites/entrez?Db=gene&Cmd=ShowDetailView&TermToSearch=285501&ordinalpos=1&itool=EntrezSystem2.PEntrez.Gene.Gene_ResultsPanel.Gene_RVDocSum	LOC285501	LOC285501	623	http://www.ncbi.nlm.nih.gov/sites/entrez?Db=gene&Cmd=ShowDetailView&TermToSearch=NA&ordinalpos=1&itool=EntrezSystem2.PEntrez.Gene.Gene_ResultsPanel.Gene_RVDocSum	NA	NA	NA	2.1	0.4	0.8	0.1	0.025	0.0064	0.12	0.2	-0.4	0.7	0	0.97	0.011	0.12
http://www.ensembl.org/Homo_sapiens/Variation/Summary?v=rs7349633	rs7349633	rs7349633	4	0.75	0.24	0	0.01	3.8e-06	0.6	0.13	0.01	T	G	0.25	http://www.ncbi.nlm.nih.gov/sites/entrez?Db=gene&Cmd=ShowDetailView&TermToSearch=644042&ordinalpos=1&itool=EntrezSystem2.PEntrez.Gene.Gene_ResultsPanel.Gene_RVDocSum	LOC644042	LOC644042	3	http://www.ncbi.nlm.nih.gov/sites/entrez?Db=gene&Cmd=ShowDetailView&TermToSearch=2160&ordinalpos=1&itool=EntrezSystem2.PEntrez.Gene.Gene_ResultsPanel.Gene_RVDocSum	F11	F11	37	http://www.ncbi.nlm.nih.gov/sites/entrez?Db=gene&Cmd=ShowDetailView&TermToSearch=3818&ordinalpos=1&itool=EntrezSystem2.PEntrez.Gene.Gene_ResultsPanel.Gene_RVDocSum	KLKB1	KLKB1	67	3.5	3.1	0.7	-0.3	1e-05	0.011	0.78	-0.6	-0.4	-0.4	-0.2	0.39	0.59	0.48
http://www.ensembl.org/Homo_sapiens/Variation/Summary?v=rs7689330	rs7689330	rs7689330	4	0.75	0.24	0	0.01	3.7e-06	0.62	0.13	0.01	T	A	0.27	http://www.ncbi.nlm.nih.gov/sites/entrez?Db=gene&Cmd=ShowDetailView&TermToSearch=644042&ordinalpos=1&itool=EntrezSystem2.PEntrez.Gene.Gene_ResultsPanel.Gene_RVDocSum	LOC644042	LOC644042	5	http://www.ncbi.nlm.nih.gov/sites/entrez?Db=gene&Cmd=ShowDetailView&TermToSearch=2160&ordinalpos=1&itool=EntrezSystem2.PEntrez.Gene.Gene_ResultsPanel.Gene_RVDocSum	F11	F11	46	http://www.ncbi.nlm.nih.gov/sites/entrez?Db=gene&Cmd=ShowDetailView&TermToSearch=3818&ordinalpos=1&itool=EntrezSystem2.PEntrez.Gene.Gene_ResultsPanel.Gene_RVDocSum	KLKB1	KLKB1	76	3.6	3	0.7	-0.3	1.4e-05	0.013	0.72	-0.6	-0.4	-0.4	-0.3	0.38	0.6	0.6
http://www.ensembl.org/Homo_sapiens/Variation/Summary?v=rs6552974	rs6552974	rs6552974	4	0.74	0.26	0	0.01	3.4e-06	0.61	0.13	0.01	T	C	0.27	http://www.ncbi.nlm.nih.gov/sites/entrez?Db=gene&Cmd=ShowDetailView&TermToSearch=644042&ordinalpos=1&itool=EntrezSystem2.PEntrez.Gene.Gene_ResultsPanel.Gene_RVDocSum	LOC644042	LOC644042	6	http://www.ncbi.nlm.nih.gov/sites/entrez?Db=gene&Cmd=ShowDetailView&TermToSearch=2160&ordinalpos=1&itool=EntrezSystem2.PEntrez.Gene.Gene_ResultsPanel.Gene_RVDocSum	F11	F11	47	http://www.ncbi.nlm.nih.gov/sites/entrez?Db=gene&Cmd=ShowDetailView&TermToSearch=3818&ordinalpos=1&itool=EntrezSystem2.PEntrez.Gene.Gene_ResultsPanel.Gene_RVDocSum	KLKB1	KLKB1	77	3.6	3	0.7	-0.3	1.4e-05	0.014	0.72	-0.6	-0.4	-0.4	-0.3	0.38	0.6	0.6
http://www.ensembl.org/Homo_sapiens/Variation/Summary?v=rs13143852	rs13143852	rs13143852	4	0.74	0.26	0	0.01	3.3e-06	0.61	0.13	0.01	A	G	0.27	http://www.ncbi.nlm.nih.gov/sites/entrez?Db=gene&Cmd=ShowDetailView&TermToSearch=644042&ordinalpos=1&itool=EntrezSystem2.PEntrez.Gene.Gene_ResultsPanel.Gene_RVDocSum	LOC644042	LOC644042	7	http://www.ncbi.nlm.nih.gov/sites/entrez?Db=gene&Cmd=ShowDetailView&TermToSearch=2160&ordinalpos=1&itool=EntrezSystem2.PEntrez.Gene.Gene_ResultsPanel.Gene_RVDocSum	F11	F11	47	http://www.ncbi.nlm.nih.gov/sites/entrez?Db=gene&Cmd=ShowDetailView&TermToSearch=3818&ordinalpos=1&itool=EntrezSystem2.PEntrez.Gene.Gene_ResultsPanel.Gene_RVDocSum	KLKB1	KLKB1	78	3.6	3	0.7	-0.3	1.4e-05	0.014	0.72	-0.6	-0.4	-0.4	-0.3	0.38	0.6	0.6
http://www.ensembl.org/Homo_sapiens/Variation/Summary?v=rs13148903	rs13148903	rs13148903	4	0.7	0.29	0	0.01	2.7e-06	0.58	0.13	0.02	G	A	0.25	http://www.ncbi.nlm.nih.gov/sites/entrez?Db=gene&Cmd=ShowDetailView&TermToSearch=644042&ordinalpos=1&itool=EntrezSystem2.PEntrez.Gene.Gene_ResultsPanel.Gene_RVDocSum	LOC644042	LOC644042	7	http://www.ncbi.nlm.nih.gov/sites/entrez?Db=gene&Cmd=ShowDetailView&TermToSearch=2160&ordinalpos=1&itool=EntrezSystem2.PEntrez.Gene.Gene_ResultsPanel.Gene_RVDocSum	F11	F11	48	http://www.ncbi.nlm.nih.gov/sites/entrez?Db=gene&Cmd=ShowDetailView&TermToSearch=3818&ordinalpos=1&itool=EntrezSystem2.PEntrez.Gene.Gene_ResultsPanel.Gene_RVDocSum	KLKB1	KLKB1	78	3.7	3.1	0.6	-0.3	1.1e-05	0.015	0.75	-0.6	-0.4	-0.4	-0.3	0.37	0.61	0.6
http://www.ensembl.org/Homo_sapiens/Variation/Summary?v=rs13150040	rs13150040	rs13150040	4	0.71	0.28	0	0.01	2.9e-06	0.58	0.13	0.02	T	G	0.25	http://www.ncbi.nlm.nih.gov/sites/entrez?Db=gene&Cmd=ShowDetailView&TermToSearch=644042&ordinalpos=1&itool=EntrezSystem2.PEntrez.Gene.Gene_ResultsPanel.Gene_RVDocSum	LOC644042	LOC644042	7	http://www.ncbi.nlm.nih.gov/sites/entrez?Db=gene&Cmd=ShowDetailView&TermToSearch=2160&ordinalpos=1&itool=EntrezSystem2.PEntrez.Gene.Gene_ResultsPanel.Gene_RVDocSum	F11	F11	48	http://www.ncbi.nlm.nih.gov/sites/entrez?Db=gene&Cmd=ShowDetailView&TermToSearch=3818&ordinalpos=1&itool=EntrezSystem2.PEntrez.Gene.Gene_ResultsPanel.Gene_RVDocSum	KLKB1	KLKB1	78	3.6	3.1	0.6	-0.3	1.1e-05	0.015	0.75	-0.6	-0.4	-0.4	-0.3	0.36	0.61	0.6
http://www.ensembl.org/Homo_sapiens/Variation/Summary?v=rs13149934	rs13149934	rs13149934	4	0.72	0.28	0	0.01	3e-06	0.58	0.13	0.02	T	C	0.25	http://www.ncbi.nlm.nih.gov/sites/entrez?Db=gene&Cmd=ShowDetailView&TermToSearch=644042&ordinalpos=1&itool=EntrezSystem2.PEntrez.Gene.Gene_ResultsPanel.Gene_RVDocSum	LOC644042	LOC644042	7	http://www.ncbi.nlm.nih.gov/sites/entrez?Db=gene&Cmd=ShowDetailView&TermToSearch=2160&ordinalpos=1&itool=EntrezSystem2.PEntrez.Gene.Gene_ResultsPanel.Gene_RVDocSum	F11	F11	48	http://www.ncbi.nlm.nih.gov/sites/entrez?Db=gene&Cmd=ShowDetailView&TermToSearch=3818&ordinalpos=1&itool=EntrezSystem2.PEntrez.Gene.Gene_ResultsPanel.Gene_RVDocSum	KLKB1	KLKB1	78	3.6	3.1	0.6	-0.3	1.1e-05	0.015	0.75	-0.6	-0.4	-0.4	-0.3	0.36	0.61	0.6
http://www.ensembl.org/Homo_sapiens/Variation/Summary?v=rs13150348	rs13150348	rs13150348	4	0.71	0.28	0	0.01	2.9e-06	0.57	0.14	0.02	T	C	0.25	http://www.ncbi.nlm.nih.gov/sites/entrez?Db=gene&Cmd=ShowDetailView&TermToSearch=644042&ordinalpos=1&itool=EntrezSystem2.PEntrez.Gene.Gene_ResultsPanel.Gene_RVDocSum	LOC644042	LOC644042	7	http://www.ncbi.nlm.nih.gov/sites/entrez?Db=gene&Cmd=ShowDetailView&TermToSearch=2160&ordinalpos=1&itool=EntrezSystem2.PEntrez.Gene.Gene_ResultsPanel.Gene_RVDocSum	F11	F11	48	http://www.ncbi.nlm.nih.gov/sites/entrez?Db=gene&Cmd=ShowDetailView&TermToSearch=3818&ordinalpos=1&itool=EntrezSystem2.PEntrez.Gene.Gene_ResultsPanel.Gene_RVDocSum	KLKB1	KLKB1	78	3.6	3.1	0.6	-0.3	1.1e-05	0.015	0.75	-0.6	-0.4	-0.4	-0.3	0.35	0.62	0.62
http://www.ensembl.org/Homo_sapiens/Variation/Summary?v=rs9684748	rs9684748	rs9684748	4	0.93	0	0.02	0.04	0.74	4.9e-07	-0.01	0.12	A	C	0.39	http://www.ncbi.nlm.nih.gov/sites/entrez?Db=gene&Cmd=ShowDetailView&TermToSearch=644282&ordinalpos=1&itool=EntrezSystem2.PEntrez.Gene.Gene_ResultsPanel.Gene_RVDocSum	LOC644282	LOC644282	44	http://www.ncbi.nlm.nih.gov/sites/entrez?Db=gene&Cmd=ShowDetailView&TermToSearch=644325&ordinalpos=1&itool=EntrezSystem2.PEntrez.Gene.Gene_ResultsPanel.Gene_RVDocSum	LOC644325	LOC644325	348	http://www.ncbi.nlm.nih.gov/sites/entrez?Db=gene&Cmd=ShowDetailView&TermToSearch=347706&ordinalpos=1&itool=EntrezSystem2.PEntrez.Gene.Gene_ResultsPanel.Gene_RVDocSum	MRPS36P2	MRPS36P2	497	-0.7	-0.4	-0.4	-0.3	0.39	0.97	0.55	4.4	1.1	2.2	0	0.0026	0.00013	0.11
http://www.ensembl.org/Homo_sapiens/Variation/Summary?v=rs7676864	rs7676864	rs7676864	4	0.94	0	0.02	0.04	0.73	5.3e-07	-0.01	0.12	C	T	0.39	http://www.ncbi.nlm.nih.gov/sites/entrez?Db=gene&Cmd=ShowDetailView&TermToSearch=644282&ordinalpos=1&itool=EntrezSystem2.PEntrez.Gene.Gene_ResultsPanel.Gene_RVDocSum	LOC644282	LOC644282	41	http://www.ncbi.nlm.nih.gov/sites/entrez?Db=gene&Cmd=ShowDetailView&TermToSearch=644325&ordinalpos=1&itool=EntrezSystem2.PEntrez.Gene.Gene_ResultsPanel.Gene_RVDocSum	LOC644325	LOC644325	346	http://www.ncbi.nlm.nih.gov/sites/entrez?Db=gene&Cmd=ShowDetailView&TermToSearch=347706&ordinalpos=1&itool=EntrezSystem2.PEntrez.Gene.Gene_ResultsPanel.Gene_RVDocSum	MRPS36P2	MRPS36P2	499	-0.7	-0.4	-0.4	-0.3	0.4	0.98	0.57	4.3	1.1	2.1	0	0.0026	0.00015	0.1
http://www.ensembl.org/Homo_sapiens/Variation/Summary?v=rs998344	rs998344	rs998344	4	0.93	0	0.02	0.05	0.73	4.4e-07	-0.01	0.12	A	G	0.39	http://www.ncbi.nlm.nih.gov/sites/entrez?Db=gene&Cmd=ShowDetailView&TermToSearch=644282&ordinalpos=1&itool=EntrezSystem2.PEntrez.Gene.Gene_ResultsPanel.Gene_RVDocSum	LOC644282	LOC644282	28	http://www.ncbi.nlm.nih.gov/sites/entrez?Db=gene&Cmd=ShowDetailView&TermToSearch=644325&ordinalpos=1&itool=EntrezSystem2.PEntrez.Gene.Gene_ResultsPanel.Gene_RVDocSum	LOC644325	LOC644325	333	http://www.ncbi.nlm.nih.gov/sites/entrez?Db=gene&Cmd=ShowDetailView&TermToSearch=347706&ordinalpos=1&itool=EntrezSystem2.PEntrez.Gene.Gene_ResultsPanel.Gene_RVDocSum	MRPS36P2	MRPS36P2	512	-0.7	-0.4	-0.4	-0.3	0.4	0.97	0.57	4.4	1.1	2.2	0.1	0.0026	0.00012	0.1
http://www.ensembl.org/Homo_sapiens/Variation/Summary?v=rs6553064	rs6553064	rs6553064	4	0.9	0	0.03	0.06	0.55	2.6e-07	-0.01	0.12	G	A	0.4	http://www.ncbi.nlm.nih.gov/sites/entrez?Db=gene&Cmd=ShowDetailView&TermToSearch=644282&ordinalpos=1&itool=EntrezSystem2.PEntrez.Gene.Gene_ResultsPanel.Gene_RVDocSum	LOC644282	LOC644282	18	http://www.ncbi.nlm.nih.gov/sites/entrez?Db=gene&Cmd=ShowDetailView&TermToSearch=644325&ordinalpos=1&itool=EntrezSystem2.PEntrez.Gene.Gene_ResultsPanel.Gene_RVDocSum	LOC644325	LOC644325	323	http://www.ncbi.nlm.nih.gov/sites/entrez?Db=gene&Cmd=ShowDetailView&TermToSearch=347706&ordinalpos=1&itool=EntrezSystem2.PEntrez.Gene.Gene_ResultsPanel.Gene_RVDocSum	MRPS36P2	MRPS36P2	523	-0.7	-0.5	-0.5	-0.4	0.43	0.94	0.99	4.6	1.3	2.5	-0.1	0.0014	4.7e-05	0.2
http://www.ensembl.org/Homo_sapiens/Variation/Summary?v=rs1431005	rs1431005	rs1431005	4	0.87	0	0.05	0.09	0.59	1.8e-07	-0.01	0.12	A	G	0.4	http://www.ncbi.nlm.nih.gov/sites/entrez?Db=gene&Cmd=ShowDetailView&TermToSearch=644282&ordinalpos=1&itool=EntrezSystem2.PEntrez.Gene.Gene_ResultsPanel.Gene_RVDocSum	LOC644282	LOC644282	17	http://www.ncbi.nlm.nih.gov/sites/entrez?Db=gene&Cmd=ShowDetailView&TermToSearch=644325&ordinalpos=1&itool=EntrezSystem2.PEntrez.Gene.Gene_ResultsPanel.Gene_RVDocSum	LOC644325	LOC644325	322	http://www.ncbi.nlm.nih.gov/sites/entrez?Db=gene&Cmd=ShowDetailView&TermToSearch=347706&ordinalpos=1&itool=EntrezSystem2.PEntrez.Gene.Gene_ResultsPanel.Gene_RVDocSum	MRPS36P2	MRPS36P2	523	-0.7	-0.5	-0.5	-0.4	0.5	0.94	0.96	4.7	1.4	2.6	-0.1	0.0011	4.2e-05	0.2
http://www.ensembl.org/Homo_sapiens/Variation/Summary?v=rs978629	rs978629	rs978629	4	0.88	0	0.04	0.08	0.52	2.1e-07	-0.01	0.12	G	A	0.39	http://www.ncbi.nlm.nih.gov/sites/entrez?Db=gene&Cmd=ShowDetailView&TermToSearch=644282&ordinalpos=1&itool=EntrezSystem2.PEntrez.Gene.Gene_ResultsPanel.Gene_RVDocSum	LOC644282	LOC644282	15	http://www.ncbi.nlm.nih.gov/sites/entrez?Db=gene&Cmd=ShowDetailView&TermToSearch=644325&ordinalpos=1&itool=EntrezSystem2.PEntrez.Gene.Gene_ResultsPanel.Gene_RVDocSum	LOC644325	LOC644325	320	http://www.ncbi.nlm.nih.gov/sites/entrez?Db=gene&Cmd=ShowDetailView&TermToSearch=347706&ordinalpos=1&itool=EntrezSystem2.PEntrez.Gene.Gene_ResultsPanel.Gene_RVDocSum	MRPS36P2	MRPS36P2	525	-0.7	-0.5	-0.5	-0.4	0.42	0.94	0.95	4.7	1.3	2.6	-0.1	0.0014	4.3e-05	0.18
http://www.ensembl.org/Homo_sapiens/Variation/Summary?v=rs12651176	rs12651176	rs12651176	4	0.94	0	0.02	0.04	0.53	4.9e-07	-0.02	0.13	A	C	0.38	http://www.ncbi.nlm.nih.gov/sites/entrez?Db=gene&Cmd=ShowDetailView&TermToSearch=644282&ordinalpos=1&itool=EntrezSystem2.PEntrez.Gene.Gene_ResultsPanel.Gene_RVDocSum	LOC644282	LOC644282	2	http://www.ncbi.nlm.nih.gov/sites/entrez?Db=gene&Cmd=ShowDetailView&TermToSearch=644325&ordinalpos=1&itool=EntrezSystem2.PEntrez.Gene.Gene_ResultsPanel.Gene_RVDocSum	LOC644325	LOC644325	306	http://www.ncbi.nlm.nih.gov/sites/entrez?Db=gene&Cmd=ShowDetailView&TermToSearch=389249&ordinalpos=1&itool=EntrezSystem2.PEntrez.Gene.Gene_ResultsPanel.Gene_RVDocSum	LOC389249	LOC389249	531	-0.6	-0.5	-0.4	-0.3	0.52	0.82	0.91	4.3	1.2	2.4	-0.1	0.0019	6.2e-05	0.22
http://www.ensembl.org/Homo_sapiens/Variation/Summary?v=rs4623072	rs4623072	rs4623072	4	0.91	0	0.03	0.06	0.47	3.2e-07	-0.02	0.12	C	G	0.38	http://www.ncbi.nlm.nih.gov/sites/entrez?Db=gene&Cmd=ShowDetailView&TermToSearch=644282&ordinalpos=1&itool=EntrezSystem2.PEntrez.Gene.Gene_ResultsPanel.Gene_RVDocSum	LOC644282	LOC644282	15	http://www.ncbi.nlm.nih.gov/sites/entrez?Db=gene&Cmd=ShowDetailView&TermToSearch=644325&ordinalpos=1&itool=EntrezSystem2.PEntrez.Gene.Gene_ResultsPanel.Gene_RVDocSum	LOC644325	LOC644325	287	http://www.ncbi.nlm.nih.gov/sites/entrez?Db=gene&Cmd=ShowDetailView&TermToSearch=389249&ordinalpos=1&itool=EntrezSystem2.PEntrez.Gene.Gene_ResultsPanel.Gene_RVDocSum	LOC389249	LOC389249	511	-0.6	-0.5	-0.4	-0.3	0.37	0.99	0.83	4.5	1.2	2.6	-0.1	0.0018	3.6e-05	0.22
http://www.ensembl.org/Homo_sapiens/Variation/Summary?v=rs3798097	rs3798097	rs3798097	5	0.99	0.01	0	0	0.00013	0.24	0.1	-0.03	T	C	0.33	http://www.ncbi.nlm.nih.gov/sites/entrez?Db=gene&Cmd=ShowDetailView&TermToSearch=9037&ordinalpos=1&itool=EntrezSystem2.PEntrez.Gene.Gene_ResultsPanel.Gene_RVDocSum	SEMA5A	SEMA5A	0	http://www.ncbi.nlm.nih.gov/sites/entrez?Db=gene&Cmd=ShowDetailView&TermToSearch=50834&ordinalpos=1&itool=EntrezSystem2.PEntrez.Gene.Gene_ResultsPanel.Gene_RVDocSum	TAS2R1	TAS2R1	87	http://www.ncbi.nlm.nih.gov/sites/entrez?Db=gene&Cmd=ShowDetailView&TermToSearch=134145&ordinalpos=1&itool=EntrezSystem2.PEntrez.Gene.Gene_ResultsPanel.Gene_RVDocSum	LOC134145	LOC134145	684	2.2	1.4	1	-0.3	0.0013	0.008	0.97	-0.5	-0.4	-0.4	-0.3	0.33	0.72	0.49
http://www.ensembl.org/Homo_sapiens/Variation/Summary?v=rs7738030	rs7738030	rs7738030	5	0.98	0.02	0	0	8.5e-05	0.97	0.15	0	G	A	0.17	http://www.ncbi.nlm.nih.gov/sites/entrez?Db=gene&Cmd=ShowDetailView&TermToSearch=2502&ordinalpos=1&itool=EntrezSystem2.PEntrez.Gene.Gene_ResultsPanel.Gene_RVDocSum	FTHL10	FTHL10	60	http://www.ncbi.nlm.nih.gov/sites/entrez?Db=gene&Cmd=ShowDetailView&TermToSearch=285697&ordinalpos=1&itool=EntrezSystem2.PEntrez.Gene.Gene_ResultsPanel.Gene_RVDocSum	LOC285697	LOC285697	72	http://www.ncbi.nlm.nih.gov/sites/entrez?Db=gene&Cmd=ShowDetailView&TermToSearch=340096&ordinalpos=1&itool=EntrezSystem2.PEntrez.Gene.Gene_ResultsPanel.Gene_RVDocSum	LOC340096	LOC340096	77	2.4	1.7	-0.2	0.5	0.00049	0.41	0.024	-0.5	-0.4	-0.2	-0.2	0.84	0.46	0.47
http://www.ensembl.org/Homo_sapiens/Variation/Summary?v=rs250379	rs250379	rs250379	5	0.99	0.01	0	0	0.00011	0.87	0.31	-0.01	G	A	0.04	http://www.ncbi.nlm.nih.gov/sites/entrez?Db=gene&Cmd=ShowDetailView&TermToSearch=54622&ordinalpos=1&itool=EntrezSystem2.PEntrez.Gene.Gene_ResultsPanel.Gene_RVDocSum	ARL15	ARL15	0	http://www.ncbi.nlm.nih.gov/sites/entrez?Db=gene&Cmd=ShowDetailView&TermToSearch=8988&ordinalpos=1&itool=EntrezSystem2.PEntrez.Gene.Gene_ResultsPanel.Gene_RVDocSum	HSPB3	HSPB3	210	http://www.ncbi.nlm.nih.gov/sites/entrez?Db=gene&Cmd=ShowDetailView&TermToSearch=112574&ordinalpos=1&itool=EntrezSystem2.PEntrez.Gene.Gene_ResultsPanel.Gene_RVDocSum	SNAG1	SNAG1	273	2.1	1.3	0	0.1	0.00089	0.19	0.067	-0.3	-0.2	-0.1	0	0.69	0.64	0.26
http://www.ensembl.org/Homo_sapiens/Variation/Summary?v=rs35922	rs35922	rs35922	5	0.97	0.03	0	0	2.2e-05	0.93	0.42	0.01	T	C	0.04	http://www.ncbi.nlm.nih.gov/sites/entrez?Db=gene&Cmd=ShowDetailView&TermToSearch=54622&ordinalpos=1&itool=EntrezSystem2.PEntrez.Gene.Gene_ResultsPanel.Gene_RVDocSum	ARL15	ARL15	0	http://www.ncbi.nlm.nih.gov/sites/entrez?Db=gene&Cmd=ShowDetailView&TermToSearch=8988&ordinalpos=1&itool=EntrezSystem2.PEntrez.Gene.Gene_ResultsPanel.Gene_RVDocSum	HSPB3	HSPB3	183	http://www.ncbi.nlm.nih.gov/sites/entrez?Db=gene&Cmd=ShowDetailView&TermToSearch=112574&ordinalpos=1&itool=EntrezSystem2.PEntrez.Gene.Gene_ResultsPanel.Gene_RVDocSum	SNAG1	SNAG1	245	2.5	1.4	0.1	0.2	0.00043	0.13	0.035	-0.2	-0.2	-0.1	0	0.85	0.72	0.22
http://www.ensembl.org/Homo_sapiens/Variation/Summary?v=rs250385	rs250385	rs250385	5	0.96	0.04	0	0	1.2e-05	0.6	0.51	0.06	C	G	0.04	http://www.ncbi.nlm.nih.gov/sites/entrez?Db=gene&Cmd=ShowDetailView&TermToSearch=54622&ordinalpos=1&itool=EntrezSystem2.PEntrez.Gene.Gene_ResultsPanel.Gene_RVDocSum	ARL15	ARL15	0	http://www.ncbi.nlm.nih.gov/sites/entrez?Db=gene&Cmd=ShowDetailView&TermToSearch=8988&ordinalpos=1&itool=EntrezSystem2.PEntrez.Gene.Gene_ResultsPanel.Gene_RVDocSum	HSPB3	HSPB3	168	http://www.ncbi.nlm.nih.gov/sites/entrez?Db=gene&Cmd=ShowDetailView&TermToSearch=112574&ordinalpos=1&itool=EntrezSystem2.PEntrez.Gene.Gene_ResultsPanel.Gene_RVDocSum	SNAG1	SNAG1	231	2.6	1.7	0	0.2	8.9e-05	0.17	0.024	-0.2	-0.1	-0.1	0	0.65	0.69	0.23
http://www.ensembl.org/Homo_sapiens/Variation/Summary?v=rs35953	rs35953	rs35953	5	0.96	0.04	0	0	1e-05	0.9	0.53	0.02	G	C	0.04	http://www.ncbi.nlm.nih.gov/sites/entrez?Db=gene&Cmd=ShowDetailView&TermToSearch=54622&ordinalpos=1&itool=EntrezSystem2.PEntrez.Gene.Gene_ResultsPanel.Gene_RVDocSum	ARL15	ARL15	0	http://www.ncbi.nlm.nih.gov/sites/entrez?Db=gene&Cmd=ShowDetailView&TermToSearch=8988&ordinalpos=1&itool=EntrezSystem2.PEntrez.Gene.Gene_ResultsPanel.Gene_RVDocSum	HSPB3	HSPB3	160	http://www.ncbi.nlm.nih.gov/sites/entrez?Db=gene&Cmd=ShowDetailView&TermToSearch=112574&ordinalpos=1&itool=EntrezSystem2.PEntrez.Gene.Gene_ResultsPanel.Gene_RVDocSum	SNAG1	SNAG1	222	2.7	1.4	0.1	0.2	0.0002	0.093	0.022	-0.2	-0.1	-0.1	0	0.77	0.46	0.32
http://www.ensembl.org/Homo_sapiens/Variation/Summary?v=rs1585795	rs1585795	rs1585795	5	0.98	0.02	0	0	0.00012	0.67	-0.13	0.01	G	A	0.46	http://www.ncbi.nlm.nih.gov/sites/entrez?Db=gene&Cmd=ShowDetailView&TermToSearch=441073&ordinalpos=1&itool=EntrezSystem2.PEntrez.Gene.Gene_ResultsPanel.Gene_RVDocSum	LOC441073	LOC441073	70	http://www.ncbi.nlm.nih.gov/sites/entrez?Db=gene&Cmd=ShowDetailView&TermToSearch=4214&ordinalpos=1&itool=EntrezSystem2.PEntrez.Gene.Gene_ResultsPanel.Gene_RVDocSum	MAP3K1	MAP3K1	240	http://www.ncbi.nlm.nih.gov/sites/entrez?Db=gene&Cmd=ShowDetailView&TermToSearch=345645&ordinalpos=1&itool=EntrezSystem2.PEntrez.Gene.Gene_ResultsPanel.Gene_RVDocSum	LOC345645	LOC345645	286	2.3	0.3	0.8	0.4	0.042	0.0076	0.029	-0.5	-0.1	-0.3	-0.2	0.17	0.63	0.47
http://www.ensembl.org/Homo_sapiens/Variation/Summary?v=rs4406105	rs4406105	rs4406105	5	0.99	0.01	0	0	0.00016	0.34	-0.13	0.03	T	C	0.14	http://www.ncbi.nlm.nih.gov/sites/entrez?Db=gene&Cmd=ShowDetailView&TermToSearch=441073&ordinalpos=1&itool=EntrezSystem2.PEntrez.Gene.Gene_ResultsPanel.Gene_RVDocSum	LOC441073	LOC441073	73	http://www.ncbi.nlm.nih.gov/sites/entrez?Db=gene&Cmd=ShowDetailView&TermToSearch=4214&ordinalpos=1&itool=EntrezSystem2.PEntrez.Gene.Gene_ResultsPanel.Gene_RVDocSum	MAP3K1	MAP3K1	236	http://www.ncbi.nlm.nih.gov/sites/entrez?Db=gene&Cmd=ShowDetailView&TermToSearch=345645&ordinalpos=1&itool=EntrezSystem2.PEntrez.Gene.Gene_ResultsPanel.Gene_RVDocSum	LOC345645	LOC345645	289	2.2	0.3	1	0.2	0.042	0.0033	0.065	-0.4	-0.3	-0.2	-0.2	0.58	0.46	0.72
http://www.ensembl.org/Homo_sapiens/Variation/Summary?v=rs4129542	rs4129542	rs4129542	5	0.98	0.02	0	0	8.9e-05	0.31	-0.13	0.03	G	A	0.15	http://www.ncbi.nlm.nih.gov/sites/entrez?Db=gene&Cmd=ShowDetailView&TermToSearch=441073&ordinalpos=1&itool=EntrezSystem2.PEntrez.Gene.Gene_ResultsPanel.Gene_RVDocSum	LOC441073	LOC441073	78	http://www.ncbi.nlm.nih.gov/sites/entrez?Db=gene&Cmd=ShowDetailView&TermToSearch=4214&ordinalpos=1&itool=EntrezSystem2.PEntrez.Gene.Gene_ResultsPanel.Gene_RVDocSum	MAP3K1	MAP3K1	232	http://www.ncbi.nlm.nih.gov/sites/entrez?Db=gene&Cmd=ShowDetailView&TermToSearch=345645&ordinalpos=1&itool=EntrezSystem2.PEntrez.Gene.Gene_ResultsPanel.Gene_RVDocSum	LOC345645	LOC345645	294	2.4	0.4	1	0.2	0.035	0.0039	0.073	-0.4	-0.3	-0.3	-0.2	0.49	0.5	0.74
http://www.ensembl.org/Homo_sapiens/Variation/Summary?v=rs1382906	rs1382906	rs1382906	5	0.98	0.01	0	0	0.00013	0.3	-0.16	0.04	T	C	0.11	http://www.ncbi.nlm.nih.gov/sites/entrez?Db=gene&Cmd=ShowDetailView&TermToSearch=441073&ordinalpos=1&itool=EntrezSystem2.PEntrez.Gene.Gene_ResultsPanel.Gene_RVDocSum	LOC441073	LOC441073	80	http://www.ncbi.nlm.nih.gov/sites/entrez?Db=gene&Cmd=ShowDetailView&TermToSearch=4214&ordinalpos=1&itool=EntrezSystem2.PEntrez.Gene.Gene_ResultsPanel.Gene_RVDocSum	MAP3K1	MAP3K1	230	http://www.ncbi.nlm.nih.gov/sites/entrez?Db=gene&Cmd=ShowDetailView&TermToSearch=345645&ordinalpos=1&itool=EntrezSystem2.PEntrez.Gene.Gene_ResultsPanel.Gene_RVDocSum	LOC345645	LOC345645	296	2.2	0.3	1	0.2	0.037	0.0034	0.069	-0.3	-0.3	-0.2	-0.2	0.51	0.44	0.72
http://www.ensembl.org/Homo_sapiens/Variation/Summary?v=rs2161246	rs2161246	rs2161246	5	0.99	0	0	0.01	0.67	5.4e-06	0.01	-0.11	G	A	0.32	http://www.ncbi.nlm.nih.gov/sites/entrez?Db=gene&Cmd=ShowDetailView&TermToSearch=115827&ordinalpos=1&itool=EntrezSystem2.PEntrez.Gene.Gene_ResultsPanel.Gene_RVDocSum	RAB3C	RAB3C	0	http://www.ncbi.nlm.nih.gov/sites/entrez?Db=gene&Cmd=ShowDetailView&TermToSearch=202309&ordinalpos=1&itool=EntrezSystem2.PEntrez.Gene.Gene_ResultsPanel.Gene_RVDocSum	FLJ33641	FLJ33641	179	http://www.ncbi.nlm.nih.gov/sites/entrez?Db=gene&Cmd=ShowDetailView&TermToSearch=10769&ordinalpos=1&itool=EntrezSystem2.PEntrez.Gene.Gene_ResultsPanel.Gene_RVDocSum	PLK2	PLK2	215	-0.6	-0.4	-0.4	0.7	0.37	0.94	0.0095	3.6	2.5	0.6	-0.3	6.5e-05	0.018	0.41
http://www.ensembl.org/Homo_sapiens/Variation/Summary?v=rs158990	rs158990	rs158990	5	0.97	0	0.01	0.02	0.7	3e-06	0.01	-0.11	A	G	0.32	http://www.ncbi.nlm.nih.gov/sites/entrez?Db=gene&Cmd=ShowDetailView&TermToSearch=115827&ordinalpos=1&itool=EntrezSystem2.PEntrez.Gene.Gene_ResultsPanel.Gene_RVDocSum	RAB3C	RAB3C	0	http://www.ncbi.nlm.nih.gov/sites/entrez?Db=gene&Cmd=ShowDetailView&TermToSearch=202309&ordinalpos=1&itool=EntrezSystem2.PEntrez.Gene.Gene_ResultsPanel.Gene_RVDocSum	FLJ33641	FLJ33641	181	http://www.ncbi.nlm.nih.gov/sites/entrez?Db=gene&Cmd=ShowDetailView&TermToSearch=10769&ordinalpos=1&itool=EntrezSystem2.PEntrez.Gene.Gene_ResultsPanel.Gene_RVDocSum	PLK2	PLK2	217	-0.6	-0.4	-0.4	0.7	0.34	0.93	0.0092	3.9	2.6	0.7	-0.3	4.7e-05	0.014	0.4
http://www.ensembl.org/Homo_sapiens/Variation/Summary?v=rs4704200	rs4704200	rs4704200	5	0.99	0.01	0	0	0.00016	0.51	0.1	0.02	T	G	0.41	http://www.ncbi.nlm.nih.gov/sites/entrez?Db=gene&Cmd=ShowDetailView&TermToSearch=256006&ordinalpos=1&itool=EntrezSystem2.PEntrez.Gene.Gene_ResultsPanel.Gene_RVDocSum	ANKRD31	ANKRD31	37	http://www.ncbi.nlm.nih.gov/sites/entrez?Db=gene&Cmd=ShowDetailView&TermToSearch=728775&ordinalpos=1&itool=EntrezSystem2.PEntrez.Gene.Gene_ResultsPanel.Gene_RVDocSum	LOC728775	LOC728775	63	http://www.ncbi.nlm.nih.gov/sites/entrez?Db=gene&Cmd=ShowDetailView&TermToSearch=3156&ordinalpos=1&itool=EntrezSystem2.PEntrez.Gene.Gene_ResultsPanel.Gene_RVDocSum	HMGCR	HMGCR	63	2.1	1.8	-0.2	0	0.00044	0.21	0.14	-0.4	-0.5	-0.1	-0.3	0.68	0.13	0.9
http://www.ensembl.org/Homo_sapiens/Variation/Summary?v=rs2126736	rs2126736	rs2126736	5	0.99	0.01	0	0	0.00014	0.51	0.1	0.02	G	A	0.41	http://www.ncbi.nlm.nih.gov/sites/entrez?Db=gene&Cmd=ShowDetailView&TermToSearch=256006&ordinalpos=1&itool=EntrezSystem2.PEntrez.Gene.Gene_ResultsPanel.Gene_RVDocSum	ANKRD31	ANKRD31	42	http://www.ncbi.nlm.nih.gov/sites/entrez?Db=gene&Cmd=ShowDetailView&TermToSearch=728775&ordinalpos=1&itool=EntrezSystem2.PEntrez.Gene.Gene_ResultsPanel.Gene_RVDocSum	LOC728775	LOC728775	58	http://www.ncbi.nlm.nih.gov/sites/entrez?Db=gene&Cmd=ShowDetailView&TermToSearch=3156&ordinalpos=1&itool=EntrezSystem2.PEntrez.Gene.Gene_ResultsPanel.Gene_RVDocSum	HMGCR	HMGCR	58	2.2	1.8	-0.2	0	0.00044	0.19	0.14	-0.4	-0.5	0	-0.3	0.68	0.13	0.9
http://www.ensembl.org/Homo_sapiens/Variation/Summary?v=rs1423527	rs1423527	rs1423527	5	0.98	0.02	0	0	8.6e-05	0.37	0.1	0.02	A	C	0.41	http://www.ncbi.nlm.nih.gov/sites/entrez?Db=gene&Cmd=ShowDetailView&TermToSearch=728775&ordinalpos=1&itool=EntrezSystem2.PEntrez.Gene.Gene_ResultsPanel.Gene_RVDocSum	LOC728775	LOC728775	30	http://www.ncbi.nlm.nih.gov/sites/entrez?Db=gene&Cmd=ShowDetailView&TermToSearch=3156&ordinalpos=1&itool=EntrezSystem2.PEntrez.Gene.Gene_ResultsPanel.Gene_RVDocSum	HMGCR	HMGCR	30	http://www.ncbi.nlm.nih.gov/sites/entrez?Db=gene&Cmd=ShowDetailView&TermToSearch=256006&ordinalpos=1&itool=EntrezSystem2.PEntrez.Gene.Gene_ResultsPanel.Gene_RVDocSum	ANKRD31	ANKRD31	70	2.3	1.9	-0.1	-0.2	0.0003	0.13	0.27	-0.4	-0.6	0.1	-0.3	0.84	0.07	0.98
http://www.ensembl.org/Homo_sapiens/Variation/Summary?v=rs6871667	rs6871667	rs6871667	5	0.98	0.02	0	0	7.1e-05	0.28	0.1	0.03	A	G	0.4	http://www.ncbi.nlm.nih.gov/sites/entrez?Db=gene&Cmd=ShowDetailView&TermToSearch=728775&ordinalpos=1&itool=EntrezSystem2.PEntrez.Gene.Gene_ResultsPanel.Gene_RVDocSum	LOC728775	LOC728775	28	http://www.ncbi.nlm.nih.gov/sites/entrez?Db=gene&Cmd=ShowDetailView&TermToSearch=3156&ordinalpos=1&itool=EntrezSystem2.PEntrez.Gene.Gene_ResultsPanel.Gene_RVDocSum	HMGCR	HMGCR	28	http://www.ncbi.nlm.nih.gov/sites/entrez?Db=gene&Cmd=ShowDetailView&TermToSearch=10087&ordinalpos=1&itool=EntrezSystem2.PEntrez.Gene.Gene_ResultsPanel.Gene_RVDocSum	COL4A3BP	COL4A3BP	70	2.4	1.9	-0.1	-0.1	0.00027	0.12	0.27	-0.4	-0.6	0.1	-0.3	0.99	0.063	0.9
http://www.ensembl.org/Homo_sapiens/Variation/Summary?v=rs10056811	rs10056811	rs10056811	5	0.99	0.01	0	0	0.00016	0.22	0.1	0.03	A	G	0.32	http://www.ncbi.nlm.nih.gov/sites/entrez?Db=gene&Cmd=ShowDetailView&TermToSearch=728775&ordinalpos=1&itool=EntrezSystem2.PEntrez.Gene.Gene_ResultsPanel.Gene_RVDocSum	LOC728775	LOC728775	28	http://www.ncbi.nlm.nih.gov/sites/entrez?Db=gene&Cmd=ShowDetailView&TermToSearch=3156&ordinalpos=1&itool=EntrezSystem2.PEntrez.Gene.Gene_ResultsPanel.Gene_RVDocSum	HMGCR	HMGCR	28	http://www.ncbi.nlm.nih.gov/sites/entrez?Db=gene&Cmd=ShowDetailView&TermToSearch=10087&ordinalpos=1&itool=EntrezSystem2.PEntrez.Gene.Gene_ResultsPanel.Gene_RVDocSum	COL4A3BP	COL4A3BP	70	2.1	2.3	-0.2	-0.2	0.00012	0.21	0.42	-0.3	-0.5	0	-0.3	0.97	0.082	0.64
http://www.ensembl.org/Homo_sapiens/Variation/Summary?v=rs17671591	rs17671591	rs17671591	5	0.99	0.01	0	0	0.00014	0.21	0.1	0.03	T	C	0.35	http://www.ncbi.nlm.nih.gov/sites/entrez?Db=gene&Cmd=ShowDetailView&TermToSearch=728775&ordinalpos=1&itool=EntrezSystem2.PEntrez.Gene.Gene_ResultsPanel.Gene_RVDocSum	LOC728775	LOC728775	18	http://www.ncbi.nlm.nih.gov/sites/entrez?Db=gene&Cmd=ShowDetailView&TermToSearch=3156&ordinalpos=1&itool=EntrezSystem2.PEntrez.Gene.Gene_ResultsPanel.Gene_RVDocSum	HMGCR	HMGCR	18	http://www.ncbi.nlm.nih.gov/sites/entrez?Db=gene&Cmd=ShowDetailView&TermToSearch=10087&ordinalpos=1&itool=EntrezSystem2.PEntrez.Gene.Gene_ResultsPanel.Gene_RVDocSum	COL4A3BP	COL4A3BP	60	2.1	2	-0.1	-0.2	0.00024	0.17	0.4	-0.4	-0.5	0	-0.3	0.76	0.097	0.74
http://www.ensembl.org/Homo_sapiens/Variation/Summary?v=rs10474433	rs10474433	rs10474433	5	0.99	0.01	0	0	0.00015	0.19	0.1	0.03	C	T	0.36	http://www.ncbi.nlm.nih.gov/sites/entrez?Db=gene&Cmd=ShowDetailView&TermToSearch=728775&ordinalpos=1&itool=EntrezSystem2.PEntrez.Gene.Gene_ResultsPanel.Gene_RVDocSum	LOC728775	LOC728775	16	http://www.ncbi.nlm.nih.gov/sites/entrez?Db=gene&Cmd=ShowDetailView&TermToSearch=3156&ordinalpos=1&itool=EntrezSystem2.PEntrez.Gene.Gene_ResultsPanel.Gene_RVDocSum	HMGCR	HMGCR	16	http://www.ncbi.nlm.nih.gov/sites/entrez?Db=gene&Cmd=ShowDetailView&TermToSearch=10087&ordinalpos=1&itool=EntrezSystem2.PEntrez.Gene.Gene_ResultsPanel.Gene_RVDocSum	COL4A3BP	COL4A3BP	58	2.1	1.9	-0.1	-0.2	0.0003	0.17	0.4	-0.3	-0.5	0	-0.3	0.7	0.097	0.74
http://www.ensembl.org/Homo_sapiens/Variation/Summary?v=rs2878417	rs2878417	rs2878417	5	0.98	0.02	0	0	9.5e-05	0.26	0.1	0.03	A	G	0.4	http://www.ncbi.nlm.nih.gov/sites/entrez?Db=gene&Cmd=ShowDetailView&TermToSearch=728775&ordinalpos=1&itool=EntrezSystem2.PEntrez.Gene.Gene_ResultsPanel.Gene_RVDocSum	LOC728775	LOC728775	15	http://www.ncbi.nlm.nih.gov/sites/entrez?Db=gene&Cmd=ShowDetailView&TermToSearch=3156&ordinalpos=1&itool=EntrezSystem2.PEntrez.Gene.Gene_ResultsPanel.Gene_RVDocSum	HMGCR	HMGCR	16	http://www.ncbi.nlm.nih.gov/sites/entrez?Db=gene&Cmd=ShowDetailView&TermToSearch=10087&ordinalpos=1&itool=EntrezSystem2.PEntrez.Gene.Gene_ResultsPanel.Gene_RVDocSum	COL4A3BP	COL4A3BP	58	2.3	1.8	-0.1	-0.2	0.00042	0.12	0.28	-0.4	-0.6	0.2	-0.3	0.94	0.053	0.98
http://www.ensembl.org/Homo_sapiens/Variation/Summary?v=rs13358429	rs13358429	rs13358429	5	0.99	0.01	0	0	0.00018	0.22	0.1	0.03	A	G	0.35	http://www.ncbi.nlm.nih.gov/sites/entrez?Db=gene&Cmd=ShowDetailView&TermToSearch=728775&ordinalpos=1&itool=EntrezSystem2.PEntrez.Gene.Gene_ResultsPanel.Gene_RVDocSum	LOC728775	LOC728775	15	http://www.ncbi.nlm.nih.gov/sites/entrez?Db=gene&Cmd=ShowDetailView&TermToSearch=3156&ordinalpos=1&itool=EntrezSystem2.PEntrez.Gene.Gene_ResultsPanel.Gene_RVDocSum	HMGCR	HMGCR	15	http://www.ncbi.nlm.nih.gov/sites/entrez?Db=gene&Cmd=ShowDetailView&TermToSearch=10087&ordinalpos=1&itool=EntrezSystem2.PEntrez.Gene.Gene_ResultsPanel.Gene_RVDocSum	COL4A3BP	COL4A3BP	57	2	1.9	-0.2	-0.2	0.00031	0.19	0.4	-0.4	-0.6	0.1	-0.3	0.77	0.083	0.89
rs-link	rsnum	SNP	chr	HO	HS	HD	HS+D	P-value-S	P-value-D	Effect-S	Effect-D	Minor Allele	Major Allele	MAF	GENE1-link	GENE1	GENE1	dist1 (Kb)	GENE2-link	GENE2	GENE2	dist2 (Kb)	GENE3-link	GENE3	GENE3	dist3 (Kb)	log10BF-S	log10BF-S-TNT	log10BF-S-PRINCE	log10BF-S-CAP	P-value-S-TNT	P-value-S-PRINCE	P-value-S-CAP	log10BF-D	log10BF-D-TNT	log10BF-D-PRINCE	log10BF-D-CAP	P-value-D-TNT	P-value-D-PRINCE	P-value-D-CAP
http://www.ensembl.org/Homo_sapiens/Variation/Summary?v=rs16872768	rs16872768	rs16872768	5	0.99	0.01	0	0	0.00016	0.94	0.1	0	C	T	0.41	http://www.ncbi.nlm.nih.gov/sites/entrez?Db=gene&Cmd=ShowDetailView&TermToSearch=134359&ordinalpos=1&itool=EntrezSystem2.PEntrez.Gene.Gene_ResultsPanel.Gene_RVDocSum	FLJ35779	FLJ35779	0	http://www.ncbi.nlm.nih.gov/sites/entrez?Db=gene&Cmd=ShowDetailView&TermToSearch=728780&ordinalpos=1&itool=EntrezSystem2.PEntrez.Gene.Gene_ResultsPanel.Gene_RVDocSum	LOC728780	LOC728780	17	http://www.ncbi.nlm.nih.gov/sites/entrez?Db=gene&Cmd=ShowDetailView&TermToSearch=441087&ordinalpos=1&itool=EntrezSystem2.PEntrez.Gene.Gene_ResultsPanel.Gene_RVDocSum	LOC441087	LOC441087	31	2.1	1.1	0	0.2	0.0032	0.1	0.053	-0.7	-0.4	-0.1	-0.3	0.37	0.11	0.48
http://www.ensembl.org/Homo_sapiens/Variation/Summary?v=rs6874626	rs6874626	rs6874626	5	0.99	0.01	0	0	0.00017	0.99	0.09	0	A	G	0.38	http://www.ncbi.nlm.nih.gov/sites/entrez?Db=gene&Cmd=ShowDetailView&TermToSearch=134359&ordinalpos=1&itool=EntrezSystem2.PEntrez.Gene.Gene_ResultsPanel.Gene_RVDocSum	FLJ35779	FLJ35779	0	http://www.ncbi.nlm.nih.gov/sites/entrez?Db=gene&Cmd=ShowDetailView&TermToSearch=441087&ordinalpos=1&itool=EntrezSystem2.PEntrez.Gene.Gene_ResultsPanel.Gene_RVDocSum	LOC441087	LOC441087	14	http://www.ncbi.nlm.nih.gov/sites/entrez?Db=gene&Cmd=ShowDetailView&TermToSearch=728780&ordinalpos=1&itool=EntrezSystem2.PEntrez.Gene.Gene_ResultsPanel.Gene_RVDocSum	LOC728780	LOC728780	34	2.1	1	0	0.2	0.0042	0.095	0.061	-0.7	-0.5	0	-0.3	0.37	0.1	0.45
http://www.ensembl.org/Homo_sapiens/Variation/Summary?v=rs2112347	rs2112347	rs2112347	5	0.98	0.01	0	0	0.00013	0.98	0.1	0	G	T	0.37	http://www.ncbi.nlm.nih.gov/sites/entrez?Db=gene&Cmd=ShowDetailView&TermToSearch=441087&ordinalpos=1&itool=EntrezSystem2.PEntrez.Gene.Gene_ResultsPanel.Gene_RVDocSum	LOC441087	LOC441087	0	http://www.ncbi.nlm.nih.gov/sites/entrez?Db=gene&Cmd=ShowDetailView&TermToSearch=134359&ordinalpos=1&itool=EntrezSystem2.PEntrez.Gene.Gene_ResultsPanel.Gene_RVDocSum	FLJ35779	FLJ35779	7	http://www.ncbi.nlm.nih.gov/sites/entrez?Db=gene&Cmd=ShowDetailView&TermToSearch=728780&ordinalpos=1&itool=EntrezSystem2.PEntrez.Gene.Gene_ResultsPanel.Gene_RVDocSum	LOC728780	LOC728780	50	2.2	1	0.2	0.1	0.0042	0.046	0.11	-0.7	-0.5	0	-0.3	0.38	0.1	0.51
http://www.ensembl.org/Homo_sapiens/Variation/Summary?v=rs6453143	rs6453143	rs6453143	5	0.99	0.01	0	0	0.00019	0.83	0.1	0.01	C	G	0.38	http://www.ncbi.nlm.nih.gov/sites/entrez?Db=gene&Cmd=ShowDetailView&TermToSearch=441087&ordinalpos=1&itool=EntrezSystem2.PEntrez.Gene.Gene_ResultsPanel.Gene_RVDocSum	LOC441087	LOC441087	0	http://www.ncbi.nlm.nih.gov/sites/entrez?Db=gene&Cmd=ShowDetailView&TermToSearch=134359&ordinalpos=1&itool=EntrezSystem2.PEntrez.Gene.Gene_ResultsPanel.Gene_RVDocSum	FLJ35779	FLJ35779	15	http://www.ncbi.nlm.nih.gov/sites/entrez?Db=gene&Cmd=ShowDetailView&TermToSearch=728780&ordinalpos=1&itool=EntrezSystem2.PEntrez.Gene.Gene_ResultsPanel.Gene_RVDocSum	LOC728780	LOC728780	58	2.1	0.8	0.5	-0.1	0.0064	0.018	0.28	-0.6	-0.4	0	-0.3	0.43	0.093	0.61
http://www.ensembl.org/Homo_sapiens/Variation/Summary?v=rs7715806	rs7715806	rs7715806	5	0.98	0.02	0	0	0.00014	0.81	0.11	0.01	T	C	0.38	http://www.ncbi.nlm.nih.gov/sites/entrez?Db=gene&Cmd=ShowDetailView&TermToSearch=441087&ordinalpos=1&itool=EntrezSystem2.PEntrez.Gene.Gene_ResultsPanel.Gene_RVDocSum	LOC441087	LOC441087	0	http://www.ncbi.nlm.nih.gov/sites/entrez?Db=gene&Cmd=ShowDetailView&TermToSearch=134359&ordinalpos=1&itool=EntrezSystem2.PEntrez.Gene.Gene_ResultsPanel.Gene_RVDocSum	FLJ35779	FLJ35779	26	http://www.ncbi.nlm.nih.gov/sites/entrez?Db=gene&Cmd=ShowDetailView&TermToSearch=728780&ordinalpos=1&itool=EntrezSystem2.PEntrez.Gene.Gene_ResultsPanel.Gene_RVDocSum	LOC728780	LOC728780	69	2.2	0.9	0.6	-0.1	0.0054	0.016	0.28	-0.6	-0.4	0	-0.3	0.43	0.094	0.62
http://www.ensembl.org/Homo_sapiens/Variation/Summary?v=rs9942416	rs9942416	rs9942416	5	0.99	0.01	0	0	0.00019	0.67	0.1	0.01	G	C	0.39	http://www.ncbi.nlm.nih.gov/sites/entrez?Db=gene&Cmd=ShowDetailView&TermToSearch=441087&ordinalpos=1&itool=EntrezSystem2.PEntrez.Gene.Gene_ResultsPanel.Gene_RVDocSum	LOC441087	LOC441087	0	http://www.ncbi.nlm.nih.gov/sites/entrez?Db=gene&Cmd=ShowDetailView&TermToSearch=134359&ordinalpos=1&itool=EntrezSystem2.PEntrez.Gene.Gene_ResultsPanel.Gene_RVDocSum	FLJ35779	FLJ35779	29	http://www.ncbi.nlm.nih.gov/sites/entrez?Db=gene&Cmd=ShowDetailView&TermToSearch=728780&ordinalpos=1&itool=EntrezSystem2.PEntrez.Gene.Gene_ResultsPanel.Gene_RVDocSum	LOC728780	LOC728780	72	2.1	0.9	0.6	-0.2	0.0058	0.015	0.36	-0.6	-0.4	0.2	-0.3	0.43	0.059	0.74
http://www.ensembl.org/Homo_sapiens/Variation/Summary?v=rs258494	rs258494	rs258494	5	0.99	0.01	0	0	0.00019	0.77	0.11	0.01	C	G	0.37	http://www.ncbi.nlm.nih.gov/sites/entrez?Db=gene&Cmd=ShowDetailView&TermToSearch=441087&ordinalpos=1&itool=EntrezSystem2.PEntrez.Gene.Gene_ResultsPanel.Gene_RVDocSum	LOC441087	LOC441087	0	http://www.ncbi.nlm.nih.gov/sites/entrez?Db=gene&Cmd=ShowDetailView&TermToSearch=134359&ordinalpos=1&itool=EntrezSystem2.PEntrez.Gene.Gene_ResultsPanel.Gene_RVDocSum	FLJ35779	FLJ35779	30	http://www.ncbi.nlm.nih.gov/sites/entrez?Db=gene&Cmd=ShowDetailView&TermToSearch=728780&ordinalpos=1&itool=EntrezSystem2.PEntrez.Gene.Gene_ResultsPanel.Gene_RVDocSum	LOC728780	LOC728780	73	2.1	1	0.4	-0.1	0.0045	0.03	0.26	-0.6	-0.4	0	-0.3	0.46	0.095	0.66
http://www.ensembl.org/Homo_sapiens/Variation/Summary?v=rs10474449	rs10474449	rs10474449	5	0.99	0.01	0	0	0.00018	0.85	0.09	0	A	T	0.38	http://www.ncbi.nlm.nih.gov/sites/entrez?Db=gene&Cmd=ShowDetailView&TermToSearch=391798&ordinalpos=1&itool=EntrezSystem2.PEntrez.Gene.Gene_ResultsPanel.Gene_RVDocSum	LOC391798	LOC391798	0	http://www.ncbi.nlm.nih.gov/sites/entrez?Db=gene&Cmd=ShowDetailView&TermToSearch=644601&ordinalpos=1&itool=EntrezSystem2.PEntrez.Gene.Gene_ResultsPanel.Gene_RVDocSum	LOC644601	LOC644601	23	http://www.ncbi.nlm.nih.gov/sites/entrez?Db=gene&Cmd=ShowDetailView&TermToSearch=134357&ordinalpos=1&itool=EntrezSystem2.PEntrez.Gene.Gene_ResultsPanel.Gene_RVDocSum	LOC134357	LOC134357	79	2.1	1.6	0.2	-0.3	0.00064	0.074	0.5	-0.7	-0.4	-0.4	-0.3	0.32	0.45	0.84
http://www.ensembl.org/Homo_sapiens/Variation/Summary?v=rs6891632	rs6891632	rs6891632	5	0.98	0.02	0	0	0.00014	0.96	0.09	0	C	T	0.41	http://www.ncbi.nlm.nih.gov/sites/entrez?Db=gene&Cmd=ShowDetailView&TermToSearch=391798&ordinalpos=1&itool=EntrezSystem2.PEntrez.Gene.Gene_ResultsPanel.Gene_RVDocSum	LOC391798	LOC391798	0	http://www.ncbi.nlm.nih.gov/sites/entrez?Db=gene&Cmd=ShowDetailView&TermToSearch=644601&ordinalpos=1&itool=EntrezSystem2.PEntrez.Gene.Gene_ResultsPanel.Gene_RVDocSum	LOC644601	LOC644601	22	http://www.ncbi.nlm.nih.gov/sites/entrez?Db=gene&Cmd=ShowDetailView&TermToSearch=134357&ordinalpos=1&itool=EntrezSystem2.PEntrez.Gene.Gene_ResultsPanel.Gene_RVDocSum	LOC134357	LOC134357	78	2.3	1.6	0.3	-0.3	0.00057	0.056	0.56	-0.7	-0.4	-0.3	-0.3	0.28	0.31	0.51
http://www.ensembl.org/Homo_sapiens/Variation/Summary?v=rs6887352	rs6887352	rs6887352	5	0.99	0.01	0	0	0.00018	0.85	0.09	0	G	A	0.38	http://www.ncbi.nlm.nih.gov/sites/entrez?Db=gene&Cmd=ShowDetailView&TermToSearch=391798&ordinalpos=1&itool=EntrezSystem2.PEntrez.Gene.Gene_ResultsPanel.Gene_RVDocSum	LOC391798	LOC391798	0	http://www.ncbi.nlm.nih.gov/sites/entrez?Db=gene&Cmd=ShowDetailView&TermToSearch=644601&ordinalpos=1&itool=EntrezSystem2.PEntrez.Gene.Gene_ResultsPanel.Gene_RVDocSum	LOC644601	LOC644601	22	http://www.ncbi.nlm.nih.gov/sites/entrez?Db=gene&Cmd=ShowDetailView&TermToSearch=134357&ordinalpos=1&itool=EntrezSystem2.PEntrez.Gene.Gene_ResultsPanel.Gene_RVDocSum	LOC134357	LOC134357	78	2.1	1.6	0.2	-0.3	0.00064	0.074	0.5	-0.7	-0.4	-0.4	-0.3	0.32	0.45	0.84
http://www.ensembl.org/Homo_sapiens/Variation/Summary?v=rs17564561	rs17564561	rs17564561	5	0.98	0.02	0	0	0.0001	1	0.09	0	T	A	0.42	http://www.ncbi.nlm.nih.gov/sites/entrez?Db=gene&Cmd=ShowDetailView&TermToSearch=391798&ordinalpos=1&itool=EntrezSystem2.PEntrez.Gene.Gene_ResultsPanel.Gene_RVDocSum	LOC391798	LOC391798	0	http://www.ncbi.nlm.nih.gov/sites/entrez?Db=gene&Cmd=ShowDetailView&TermToSearch=644601&ordinalpos=1&itool=EntrezSystem2.PEntrez.Gene.Gene_ResultsPanel.Gene_RVDocSum	LOC644601	LOC644601	21	http://www.ncbi.nlm.nih.gov/sites/entrez?Db=gene&Cmd=ShowDetailView&TermToSearch=134357&ordinalpos=1&itool=EntrezSystem2.PEntrez.Gene.Gene_ResultsPanel.Gene_RVDocSum	LOC134357	LOC134357	77	2.4	1.6	0.3	-0.3	0.00065	0.05	0.48	-0.7	-0.4	-0.3	-0.3	0.27	0.32	0.47
http://www.ensembl.org/Homo_sapiens/Variation/Summary?v=rs9293659	rs9293659	rs9293659	5	0.99	0.01	0	0	0.00018	0.84	0.09	0	A	T	0.38	http://www.ncbi.nlm.nih.gov/sites/entrez?Db=gene&Cmd=ShowDetailView&TermToSearch=391798&ordinalpos=1&itool=EntrezSystem2.PEntrez.Gene.Gene_ResultsPanel.Gene_RVDocSum	LOC391798	LOC391798	0	http://www.ncbi.nlm.nih.gov/sites/entrez?Db=gene&Cmd=ShowDetailView&TermToSearch=644601&ordinalpos=1&itool=EntrezSystem2.PEntrez.Gene.Gene_ResultsPanel.Gene_RVDocSum	LOC644601	LOC644601	19	http://www.ncbi.nlm.nih.gov/sites/entrez?Db=gene&Cmd=ShowDetailView&TermToSearch=134357&ordinalpos=1&itool=EntrezSystem2.PEntrez.Gene.Gene_ResultsPanel.Gene_RVDocSum	LOC134357	LOC134357	75	2.1	1.6	0.2	-0.3	0.00063	0.074	0.5	-0.7	-0.4	-0.4	-0.3	0.32	0.45	0.83
http://www.ensembl.org/Homo_sapiens/Variation/Summary?v=rs10805894	rs10805894	rs10805894	5	0.98	0.02	0	0	0.00012	1	0.09	0	A	C	0.42	http://www.ncbi.nlm.nih.gov/sites/entrez?Db=gene&Cmd=ShowDetailView&TermToSearch=391798&ordinalpos=1&itool=EntrezSystem2.PEntrez.Gene.Gene_ResultsPanel.Gene_RVDocSum	LOC391798	LOC391798	0	http://www.ncbi.nlm.nih.gov/sites/entrez?Db=gene&Cmd=ShowDetailView&TermToSearch=644601&ordinalpos=1&itool=EntrezSystem2.PEntrez.Gene.Gene_ResultsPanel.Gene_RVDocSum	LOC644601	LOC644601	14	http://www.ncbi.nlm.nih.gov/sites/entrez?Db=gene&Cmd=ShowDetailView&TermToSearch=134357&ordinalpos=1&itool=EntrezSystem2.PEntrez.Gene.Gene_ResultsPanel.Gene_RVDocSum	LOC134357	LOC134357	70	2.4	1.6	0.4	-0.3	0.00065	0.045	0.54	-0.7	-0.4	-0.4	-0.3	0.31	0.45	0.43
http://www.ensembl.org/Homo_sapiens/Variation/Summary?v=rs277861	rs277861	rs277861	5	0.99	0.01	0	0	0.00022	0.66	0.1	0.01	C	T	0.36	http://www.ncbi.nlm.nih.gov/sites/entrez?Db=gene&Cmd=ShowDetailView&TermToSearch=7903&ordinalpos=1&itool=EntrezSystem2.PEntrez.Gene.Gene_ResultsPanel.Gene_RVDocSum	ST8SIA4	ST8SIA4	55	http://www.ncbi.nlm.nih.gov/sites/entrez?Db=gene&Cmd=ShowDetailView&TermToSearch=345757&ordinalpos=1&itool=EntrezSystem2.PEntrez.Gene.Gene_ResultsPanel.Gene_RVDocSum	TMEM157	TMEM157	166	http://www.ncbi.nlm.nih.gov/sites/entrez?Db=gene&Cmd=ShowDetailView&TermToSearch=441098&ordinalpos=1&itool=EntrezSystem2.PEntrez.Gene.Gene_ResultsPanel.Gene_RVDocSum	LOC441098	LOC441098	359	2.2	1.9	-0.4	0.3	0.00029	0.51	0.052	-0.6	-0.5	-0.4	-0.2	0.76	0.82	0.37
http://www.ensembl.org/Homo_sapiens/Variation/Summary?v=rs157041	rs157041	rs157041	5	0.99	0.01	0	0	0.0002	0.76	0.09	0.01	T	C	0.34	http://www.ncbi.nlm.nih.gov/sites/entrez?Db=gene&Cmd=ShowDetailView&TermToSearch=7903&ordinalpos=1&itool=EntrezSystem2.PEntrez.Gene.Gene_ResultsPanel.Gene_RVDocSum	ST8SIA4	ST8SIA4	52	http://www.ncbi.nlm.nih.gov/sites/entrez?Db=gene&Cmd=ShowDetailView&TermToSearch=345757&ordinalpos=1&itool=EntrezSystem2.PEntrez.Gene.Gene_ResultsPanel.Gene_RVDocSum	TMEM157	TMEM157	168	http://www.ncbi.nlm.nih.gov/sites/entrez?Db=gene&Cmd=ShowDetailView&TermToSearch=441098&ordinalpos=1&itool=EntrezSystem2.PEntrez.Gene.Gene_ResultsPanel.Gene_RVDocSum	LOC441098	LOC441098	362	2.2	2	-0.4	0.4	0.00024	0.61	0.037	-0.7	-0.6	-0.5	-0.2	0.92	0.88	0.43
http://www.ensembl.org/Homo_sapiens/Variation/Summary?v=rs277864	rs277864	rs277864	5	0.99	0.01	0	0	0.0002	0.76	0.09	0.01	A	G	0.34	http://www.ncbi.nlm.nih.gov/sites/entrez?Db=gene&Cmd=ShowDetailView&TermToSearch=7903&ordinalpos=1&itool=EntrezSystem2.PEntrez.Gene.Gene_ResultsPanel.Gene_RVDocSum	ST8SIA4	ST8SIA4	51	http://www.ncbi.nlm.nih.gov/sites/entrez?Db=gene&Cmd=ShowDetailView&TermToSearch=345757&ordinalpos=1&itool=EntrezSystem2.PEntrez.Gene.Gene_ResultsPanel.Gene_RVDocSum	TMEM157	TMEM157	170	http://www.ncbi.nlm.nih.gov/sites/entrez?Db=gene&Cmd=ShowDetailView&TermToSearch=441098&ordinalpos=1&itool=EntrezSystem2.PEntrez.Gene.Gene_ResultsPanel.Gene_RVDocSum	LOC441098	LOC441098	363	2.2	2	-0.4	0.4	0.00024	0.61	0.037	-0.7	-0.6	-0.5	-0.2	0.92	0.88	0.43
http://www.ensembl.org/Homo_sapiens/Variation/Summary?v=rs278494	rs278494	rs278494	5	0.99	0.01	0	0	0.00022	0.66	0.09	0.01	A	G	0.31	http://www.ncbi.nlm.nih.gov/sites/entrez?Db=gene&Cmd=ShowDetailView&TermToSearch=7903&ordinalpos=1&itool=EntrezSystem2.PEntrez.Gene.Gene_ResultsPanel.Gene_RVDocSum	ST8SIA4	ST8SIA4	46	http://www.ncbi.nlm.nih.gov/sites/entrez?Db=gene&Cmd=ShowDetailView&TermToSearch=345757&ordinalpos=1&itool=EntrezSystem2.PEntrez.Gene.Gene_ResultsPanel.Gene_RVDocSum	TMEM157	TMEM157	174	http://www.ncbi.nlm.nih.gov/sites/entrez?Db=gene&Cmd=ShowDetailView&TermToSearch=441098&ordinalpos=1&itool=EntrezSystem2.PEntrez.Gene.Gene_ResultsPanel.Gene_RVDocSum	LOC441098	LOC441098	368	2.1	1.6	-0.4	0.4	0.00072	0.44	0.037	-0.6	-0.5	-0.4	-0.2	0.7	0.81	0.46
http://www.ensembl.org/Homo_sapiens/Variation/Summary?v=rs278495	rs278495	rs278495	5	0.99	0.01	0	0	0.0002	0.77	0.09	0.01	C	G	0.33	http://www.ncbi.nlm.nih.gov/sites/entrez?Db=gene&Cmd=ShowDetailView&TermToSearch=7903&ordinalpos=1&itool=EntrezSystem2.PEntrez.Gene.Gene_ResultsPanel.Gene_RVDocSum	ST8SIA4	ST8SIA4	44	http://www.ncbi.nlm.nih.gov/sites/entrez?Db=gene&Cmd=ShowDetailView&TermToSearch=345757&ordinalpos=1&itool=EntrezSystem2.PEntrez.Gene.Gene_ResultsPanel.Gene_RVDocSum	TMEM157	TMEM157	177	http://www.ncbi.nlm.nih.gov/sites/entrez?Db=gene&Cmd=ShowDetailView&TermToSearch=441098&ordinalpos=1&itool=EntrezSystem2.PEntrez.Gene.Gene_ResultsPanel.Gene_RVDocSum	LOC441098	LOC441098	370	2.2	1.9	-0.4	0.4	0.0003	0.59	0.034	-0.7	-0.6	-0.5	-0.2	0.95	0.87	0.4
http://www.ensembl.org/Homo_sapiens/Variation/Summary?v=rs278496	rs278496	rs278496	5	0.98	0.01	0	0	0.00018	0.76	0.09	0.01	T	C	0.33	http://www.ncbi.nlm.nih.gov/sites/entrez?Db=gene&Cmd=ShowDetailView&TermToSearch=7903&ordinalpos=1&itool=EntrezSystem2.PEntrez.Gene.Gene_ResultsPanel.Gene_RVDocSum	ST8SIA4	ST8SIA4	43	http://www.ncbi.nlm.nih.gov/sites/entrez?Db=gene&Cmd=ShowDetailView&TermToSearch=345757&ordinalpos=1&itool=EntrezSystem2.PEntrez.Gene.Gene_ResultsPanel.Gene_RVDocSum	TMEM157	TMEM157	178	http://www.ncbi.nlm.nih.gov/sites/entrez?Db=gene&Cmd=ShowDetailView&TermToSearch=441098&ordinalpos=1&itool=EntrezSystem2.PEntrez.Gene.Gene_ResultsPanel.Gene_RVDocSum	LOC441098	LOC441098	371	2.2	1.9	-0.4	0.4	0.0003	0.57	0.033	-0.7	-0.6	-0.5	-0.2	0.95	0.88	0.4
http://www.ensembl.org/Homo_sapiens/Variation/Summary?v=rs278497	rs278497	rs278497	5	0.99	0.01	0	0	0.00027	0.78	0.09	0.01	G	A	0.33	http://www.ncbi.nlm.nih.gov/sites/entrez?Db=gene&Cmd=ShowDetailView&TermToSearch=7903&ordinalpos=1&itool=EntrezSystem2.PEntrez.Gene.Gene_ResultsPanel.Gene_RVDocSum	ST8SIA4	ST8SIA4	43	http://www.ncbi.nlm.nih.gov/sites/entrez?Db=gene&Cmd=ShowDetailView&TermToSearch=345757&ordinalpos=1&itool=EntrezSystem2.PEntrez.Gene.Gene_ResultsPanel.Gene_RVDocSum	TMEM157	TMEM157	178	http://www.ncbi.nlm.nih.gov/sites/entrez?Db=gene&Cmd=ShowDetailView&TermToSearch=441098&ordinalpos=1&itool=EntrezSystem2.PEntrez.Gene.Gene_ResultsPanel.Gene_RVDocSum	LOC441098	LOC441098	371	2.1	1.9	-0.4	0.3	0.00029	0.66	0.039	-0.7	-0.6	-0.5	-0.2	0.95	0.86	0.41
http://www.ensembl.org/Homo_sapiens/Variation/Summary?v=rs2548262	rs2548262	rs2548262	5	0.99	0.01	0	0	0.00019	0.78	0.09	0.01	T	C	0.33	http://www.ncbi.nlm.nih.gov/sites/entrez?Db=gene&Cmd=ShowDetailView&TermToSearch=7903&ordinalpos=1&itool=EntrezSystem2.PEntrez.Gene.Gene_ResultsPanel.Gene_RVDocSum	ST8SIA4	ST8SIA4	42	http://www.ncbi.nlm.nih.gov/sites/entrez?Db=gene&Cmd=ShowDetailView&TermToSearch=345757&ordinalpos=1&itool=EntrezSystem2.PEntrez.Gene.Gene_ResultsPanel.Gene_RVDocSum	TMEM157	TMEM157	179	http://www.ncbi.nlm.nih.gov/sites/entrez?Db=gene&Cmd=ShowDetailView&TermToSearch=441098&ordinalpos=1&itool=EntrezSystem2.PEntrez.Gene.Gene_ResultsPanel.Gene_RVDocSum	LOC441098	LOC441098	372	2.2	1.9	-0.4	0.4	0.00029	0.59	0.034	-0.7	-0.6	-0.5	-0.2	0.95	0.87	0.4
http://www.ensembl.org/Homo_sapiens/Variation/Summary?v=rs278502	rs278502	rs278502	5	0.98	0.01	0	0	0.00019	0.78	0.09	0.01	G	A	0.33	http://www.ncbi.nlm.nih.gov/sites/entrez?Db=gene&Cmd=ShowDetailView&TermToSearch=7903&ordinalpos=1&itool=EntrezSystem2.PEntrez.Gene.Gene_ResultsPanel.Gene_RVDocSum	ST8SIA4	ST8SIA4	40	http://www.ncbi.nlm.nih.gov/sites/entrez?Db=gene&Cmd=ShowDetailView&TermToSearch=345757&ordinalpos=1&itool=EntrezSystem2.PEntrez.Gene.Gene_ResultsPanel.Gene_RVDocSum	TMEM157	TMEM157	181	http://www.ncbi.nlm.nih.gov/sites/entrez?Db=gene&Cmd=ShowDetailView&TermToSearch=441098&ordinalpos=1&itool=EntrezSystem2.PEntrez.Gene.Gene_ResultsPanel.Gene_RVDocSum	LOC441098	LOC441098	374	2.2	1.9	-0.4	0.4	0.00029	0.58	0.033	-0.7	-0.6	-0.5	-0.2	0.95	0.87	0.4
http://www.ensembl.org/Homo_sapiens/Variation/Summary?v=rs32441	rs32441	rs32441	5	0.97	0.03	0	0	0.00012	0.71	-0.1	0.01	G	T	0.48	http://www.ncbi.nlm.nih.gov/sites/entrez?Db=gene&Cmd=ShowDetailView&TermToSearch=7903&ordinalpos=1&itool=EntrezSystem2.PEntrez.Gene.Gene_ResultsPanel.Gene_RVDocSum	ST8SIA4	ST8SIA4	38	http://www.ncbi.nlm.nih.gov/sites/entrez?Db=gene&Cmd=ShowDetailView&TermToSearch=345757&ordinalpos=1&itool=EntrezSystem2.PEntrez.Gene.Gene_ResultsPanel.Gene_RVDocSum	TMEM157	TMEM157	183	http://www.ncbi.nlm.nih.gov/sites/entrez?Db=gene&Cmd=ShowDetailView&TermToSearch=441098&ordinalpos=1&itool=EntrezSystem2.PEntrez.Gene.Gene_ResultsPanel.Gene_RVDocSum	LOC441098	LOC441098	376	2.5	1.2	-0.2	0.8	0.0019	0.25	0.0069	-0.7	-0.5	0.1	0	0.64	0.05	0.16
http://www.ensembl.org/Homo_sapiens/Variation/Summary?v=rs157043	rs157043	rs157043	5	0.99	0.01	0	0	0.00019	0.5	0.1	0.02	C	T	0.3	http://www.ncbi.nlm.nih.gov/sites/entrez?Db=gene&Cmd=ShowDetailView&TermToSearch=7903&ordinalpos=1&itool=EntrezSystem2.PEntrez.Gene.Gene_ResultsPanel.Gene_RVDocSum	ST8SIA4	ST8SIA4	36	http://www.ncbi.nlm.nih.gov/sites/entrez?Db=gene&Cmd=ShowDetailView&TermToSearch=345757&ordinalpos=1&itool=EntrezSystem2.PEntrez.Gene.Gene_ResultsPanel.Gene_RVDocSum	TMEM157	TMEM157	185	http://www.ncbi.nlm.nih.gov/sites/entrez?Db=gene&Cmd=ShowDetailView&TermToSearch=441098&ordinalpos=1&itool=EntrezSystem2.PEntrez.Gene.Gene_ResultsPanel.Gene_RVDocSum	LOC441098	LOC441098	378	2.1	1.5	-0.4	0.5	0.00085	0.46	0.021	-0.6	-0.5	-0.4	-0.2	0.73	0.89	0.37
http://www.ensembl.org/Homo_sapiens/Variation/Summary?v=rs149895	rs149895	rs149895	5	0.98	0.01	0	0	0.00016	0.8	0.1	0.01	C	T	0.31	http://www.ncbi.nlm.nih.gov/sites/entrez?Db=gene&Cmd=ShowDetailView&TermToSearch=7903&ordinalpos=1&itool=EntrezSystem2.PEntrez.Gene.Gene_ResultsPanel.Gene_RVDocSum	ST8SIA4	ST8SIA4	33	http://www.ncbi.nlm.nih.gov/sites/entrez?Db=gene&Cmd=ShowDetailView&TermToSearch=345757&ordinalpos=1&itool=EntrezSystem2.PEntrez.Gene.Gene_ResultsPanel.Gene_RVDocSum	TMEM157	TMEM157	187	http://www.ncbi.nlm.nih.gov/sites/entrez?Db=gene&Cmd=ShowDetailView&TermToSearch=441098&ordinalpos=1&itool=EntrezSystem2.PEntrez.Gene.Gene_ResultsPanel.Gene_RVDocSum	LOC441098	LOC441098	381	2.2	1.9	-0.4	0.4	0.00026	0.62	0.031	-0.7	-0.6	-0.4	-0.2	0.95	0.81	0.38
http://www.ensembl.org/Homo_sapiens/Variation/Summary?v=rs277872	rs277872	rs277872	5	0.99	0.01	0	0	0.00019	0.47	0.1	0.02	A	G	0.29	http://www.ncbi.nlm.nih.gov/sites/entrez?Db=gene&Cmd=ShowDetailView&TermToSearch=7903&ordinalpos=1&itool=EntrezSystem2.PEntrez.Gene.Gene_ResultsPanel.Gene_RVDocSum	ST8SIA4	ST8SIA4	31	http://www.ncbi.nlm.nih.gov/sites/entrez?Db=gene&Cmd=ShowDetailView&TermToSearch=345757&ordinalpos=1&itool=EntrezSystem2.PEntrez.Gene.Gene_ResultsPanel.Gene_RVDocSum	TMEM157	TMEM157	190	http://www.ncbi.nlm.nih.gov/sites/entrez?Db=gene&Cmd=ShowDetailView&TermToSearch=441098&ordinalpos=1&itool=EntrezSystem2.PEntrez.Gene.Gene_ResultsPanel.Gene_RVDocSum	LOC441098	LOC441098	383	2.1	1.5	-0.4	0.6	0.00079	0.52	0.017	-0.6	-0.5	-0.4	-0.2	0.7	0.88	0.36
http://www.ensembl.org/Homo_sapiens/Variation/Summary?v=rs277871	rs277871	rs277871	5	0.99	0.01	0	0	0.00019	0.47	0.1	0.02	C	A	0.29	http://www.ncbi.nlm.nih.gov/sites/entrez?Db=gene&Cmd=ShowDetailView&TermToSearch=7903&ordinalpos=1&itool=EntrezSystem2.PEntrez.Gene.Gene_ResultsPanel.Gene_RVDocSum	ST8SIA4	ST8SIA4	31	http://www.ncbi.nlm.nih.gov/sites/entrez?Db=gene&Cmd=ShowDetailView&TermToSearch=345757&ordinalpos=1&itool=EntrezSystem2.PEntrez.Gene.Gene_ResultsPanel.Gene_RVDocSum	TMEM157	TMEM157	190	http://www.ncbi.nlm.nih.gov/sites/entrez?Db=gene&Cmd=ShowDetailView&TermToSearch=441098&ordinalpos=1&itool=EntrezSystem2.PEntrez.Gene.Gene_ResultsPanel.Gene_RVDocSum	LOC441098	LOC441098	383	2.1	1.5	-0.4	0.6	0.00079	0.52	0.017	-0.6	-0.5	-0.4	-0.2	0.7	0.88	0.36
http://www.ensembl.org/Homo_sapiens/Variation/Summary?v=rs4703116	rs4703116	rs4703116	5	0.99	0.01	0	0	0.0002	0.82	0.09	0.01	C	T	0.35	http://www.ncbi.nlm.nih.gov/sites/entrez?Db=gene&Cmd=ShowDetailView&TermToSearch=7903&ordinalpos=1&itool=EntrezSystem2.PEntrez.Gene.Gene_ResultsPanel.Gene_RVDocSum	ST8SIA4	ST8SIA4	14	http://www.ncbi.nlm.nih.gov/sites/entrez?Db=gene&Cmd=ShowDetailView&TermToSearch=345757&ordinalpos=1&itool=EntrezSystem2.PEntrez.Gene.Gene_ResultsPanel.Gene_RVDocSum	TMEM157	TMEM157	206	http://www.ncbi.nlm.nih.gov/sites/entrez?Db=gene&Cmd=ShowDetailView&TermToSearch=441098&ordinalpos=1&itool=EntrezSystem2.PEntrez.Gene.Gene_ResultsPanel.Gene_RVDocSum	LOC441098	LOC441098	400	2.1	2.1	-0.5	0.4	0.00015	0.82	0.034	-0.7	-0.6	-0.5	-0.2	0.77	0.97	0.28
http://www.ensembl.org/Homo_sapiens/Variation/Summary?v=rs3846626	rs3846626	rs3846626	5	0.98	0.02	0	0	0.00011	0.83	0.09	0.01	G	A	0.33	http://www.ncbi.nlm.nih.gov/sites/entrez?Db=gene&Cmd=ShowDetailView&TermToSearch=7903&ordinalpos=1&itool=EntrezSystem2.PEntrez.Gene.Gene_ResultsPanel.Gene_RVDocSum	ST8SIA4	ST8SIA4	10	http://www.ncbi.nlm.nih.gov/sites/entrez?Db=gene&Cmd=ShowDetailView&TermToSearch=345757&ordinalpos=1&itool=EntrezSystem2.PEntrez.Gene.Gene_ResultsPanel.Gene_RVDocSum	TMEM157	TMEM157	211	http://www.ncbi.nlm.nih.gov/sites/entrez?Db=gene&Cmd=ShowDetailView&TermToSearch=441098&ordinalpos=1&itool=EntrezSystem2.PEntrez.Gene.Gene_ResultsPanel.Gene_RVDocSum	LOC441098	LOC441098	404	2.3	2.2	-0.5	0.4	0.00013	0.71	0.025	-0.7	-0.6	-0.5	-0.1	0.8	0.93	0.25
http://www.ensembl.org/Homo_sapiens/Variation/Summary?v=rs2548274	rs2548274	rs2548274	5	0.98	0.01	0	0	0.00012	0.75	0.1	0.01	A	G	0.33	http://www.ncbi.nlm.nih.gov/sites/entrez?Db=gene&Cmd=ShowDetailView&TermToSearch=7903&ordinalpos=1&itool=EntrezSystem2.PEntrez.Gene.Gene_ResultsPanel.Gene_RVDocSum	ST8SIA4	ST8SIA4	3	http://www.ncbi.nlm.nih.gov/sites/entrez?Db=gene&Cmd=ShowDetailView&TermToSearch=345757&ordinalpos=1&itool=EntrezSystem2.PEntrez.Gene.Gene_ResultsPanel.Gene_RVDocSum	TMEM157	TMEM157	217	http://www.ncbi.nlm.nih.gov/sites/entrez?Db=gene&Cmd=ShowDetailView&TermToSearch=441098&ordinalpos=1&itool=EntrezSystem2.PEntrez.Gene.Gene_ResultsPanel.Gene_RVDocSum	LOC441098	LOC441098	410	2.2	2.2	-0.5	0.5	0.00014	0.71	0.022	-0.6	-0.6	-0.5	-0.1	0.88	0.94	0.24
http://www.ensembl.org/Homo_sapiens/Variation/Summary?v=rs2544920	rs2544920	rs2544920	5	0.99	0.01	0	0	0.00013	0.36	0.11	0.03	A	T	0.37	http://www.ncbi.nlm.nih.gov/sites/entrez?Db=gene&Cmd=ShowDetailView&TermToSearch=7903&ordinalpos=1&itool=EntrezSystem2.PEntrez.Gene.Gene_ResultsPanel.Gene_RVDocSum	ST8SIA4	ST8SIA4	2	http://www.ncbi.nlm.nih.gov/sites/entrez?Db=gene&Cmd=ShowDetailView&TermToSearch=345757&ordinalpos=1&itool=EntrezSystem2.PEntrez.Gene.Gene_ResultsPanel.Gene_RVDocSum	TMEM157	TMEM157	219	http://www.ncbi.nlm.nih.gov/sites/entrez?Db=gene&Cmd=ShowDetailView&TermToSearch=441098&ordinalpos=1&itool=EntrezSystem2.PEntrez.Gene.Gene_ResultsPanel.Gene_RVDocSum	LOC441098	LOC441098	412	2.2	2.4	-0.4	0.5	8.5e-05	0.78	0.017	-0.5	-0.5	-0.4	-0.1	0.7	0.83	0.19
http://www.ensembl.org/Homo_sapiens/Variation/Summary?v=rs11584	rs11584	rs11584	5	0.99	0.01	0	0	0.00014	0.36	0.11	0.03	A	C	0.37	http://www.ncbi.nlm.nih.gov/sites/entrez?Db=gene&Cmd=ShowDetailView&TermToSearch=7903&ordinalpos=1&itool=EntrezSystem2.PEntrez.Gene.Gene_ResultsPanel.Gene_RVDocSum	ST8SIA4	ST8SIA4	0	http://www.ncbi.nlm.nih.gov/sites/entrez?Db=gene&Cmd=ShowDetailView&TermToSearch=345757&ordinalpos=1&itool=EntrezSystem2.PEntrez.Gene.Gene_ResultsPanel.Gene_RVDocSum	TMEM157	TMEM157	223	http://www.ncbi.nlm.nih.gov/sites/entrez?Db=gene&Cmd=ShowDetailView&TermToSearch=441098&ordinalpos=1&itool=EntrezSystem2.PEntrez.Gene.Gene_ResultsPanel.Gene_RVDocSum	LOC441098	LOC441098	416	2.2	2.4	-0.4	0.5	8.5e-05	0.78	0.018	-0.5	-0.5	-0.4	-0.1	0.7	0.83	0.19
http://www.ensembl.org/Homo_sapiens/Variation/Summary?v=rs2725124	rs2725124	rs2725124	5	0.99	0.01	0	0	0.00014	0.36	0.11	0.03	C	A	0.37	http://www.ncbi.nlm.nih.gov/sites/entrez?Db=gene&Cmd=ShowDetailView&TermToSearch=7903&ordinalpos=1&itool=EntrezSystem2.PEntrez.Gene.Gene_ResultsPanel.Gene_RVDocSum	ST8SIA4	ST8SIA4	0	http://www.ncbi.nlm.nih.gov/sites/entrez?Db=gene&Cmd=ShowDetailView&TermToSearch=345757&ordinalpos=1&itool=EntrezSystem2.PEntrez.Gene.Gene_ResultsPanel.Gene_RVDocSum	TMEM157	TMEM157	223	http://www.ncbi.nlm.nih.gov/sites/entrez?Db=gene&Cmd=ShowDetailView&TermToSearch=441098&ordinalpos=1&itool=EntrezSystem2.PEntrez.Gene.Gene_ResultsPanel.Gene_RVDocSum	LOC441098	LOC441098	417	2.2	2.4	-0.4	0.5	8.5e-05	0.78	0.018	-0.5	-0.5	-0.5	-0.1	0.7	0.84	0.19
http://www.ensembl.org/Homo_sapiens/Variation/Summary?v=rs3909452	rs3909452	rs3909452	5	0.99	0.01	0	0	0.00018	0.16	0.11	0.04	A	G	0.35	http://www.ncbi.nlm.nih.gov/sites/entrez?Db=gene&Cmd=ShowDetailView&TermToSearch=7903&ordinalpos=1&itool=EntrezSystem2.PEntrez.Gene.Gene_ResultsPanel.Gene_RVDocSum	ST8SIA4	ST8SIA4	0	http://www.ncbi.nlm.nih.gov/sites/entrez?Db=gene&Cmd=ShowDetailView&TermToSearch=345757&ordinalpos=1&itool=EntrezSystem2.PEntrez.Gene.Gene_ResultsPanel.Gene_RVDocSum	TMEM157	TMEM157	227	http://www.ncbi.nlm.nih.gov/sites/entrez?Db=gene&Cmd=ShowDetailView&TermToSearch=441098&ordinalpos=1&itool=EntrezSystem2.PEntrez.Gene.Gene_ResultsPanel.Gene_RVDocSum	LOC441098	LOC441098	421	2.1	2.1	-0.4	0.7	0.0002	0.76	0.011	-0.3	-0.4	-0.4	-0.1	0.49	0.52	0.19
http://www.ensembl.org/Homo_sapiens/Variation/Summary?v=rs12332642	rs12332642	rs12332642	5	0.99	0.01	0	0	0.00019	0.15	0.12	0.05	A	C	0.3	http://www.ncbi.nlm.nih.gov/sites/entrez?Db=gene&Cmd=ShowDetailView&TermToSearch=7903&ordinalpos=1&itool=EntrezSystem2.PEntrez.Gene.Gene_ResultsPanel.Gene_RVDocSum	ST8SIA4	ST8SIA4	0	http://www.ncbi.nlm.nih.gov/sites/entrez?Db=gene&Cmd=ShowDetailView&TermToSearch=345757&ordinalpos=1&itool=EntrezSystem2.PEntrez.Gene.Gene_ResultsPanel.Gene_RVDocSum	TMEM157	TMEM157	233	http://www.ncbi.nlm.nih.gov/sites/entrez?Db=gene&Cmd=ShowDetailView&TermToSearch=441098&ordinalpos=1&itool=EntrezSystem2.PEntrez.Gene.Gene_ResultsPanel.Gene_RVDocSum	LOC441098	LOC441098	426	2.1	1.6	-0.3	0.5	0.001	0.38	0.019	-0.2	-0.2	-0.4	-0.2	0.22	0.75	0.3
http://www.ensembl.org/Homo_sapiens/Variation/Summary?v=rs2544913	rs2544913	rs2544913	5	0.99	0.01	0	0	0.00015	0.36	0.1	0.02	A	G	0.36	http://www.ncbi.nlm.nih.gov/sites/entrez?Db=gene&Cmd=ShowDetailView&TermToSearch=7903&ordinalpos=1&itool=EntrezSystem2.PEntrez.Gene.Gene_ResultsPanel.Gene_RVDocSum	ST8SIA4	ST8SIA4	0	http://www.ncbi.nlm.nih.gov/sites/entrez?Db=gene&Cmd=ShowDetailView&TermToSearch=345757&ordinalpos=1&itool=EntrezSystem2.PEntrez.Gene.Gene_ResultsPanel.Gene_RVDocSum	TMEM157	TMEM157	240	http://www.ncbi.nlm.nih.gov/sites/entrez?Db=gene&Cmd=ShowDetailView&TermToSearch=441098&ordinalpos=1&itool=EntrezSystem2.PEntrez.Gene.Gene_ResultsPanel.Gene_RVDocSum	LOC441098	LOC441098	433	2.1	2.3	-0.5	0.5	0.00011	0.63	0.019	-0.5	-0.4	-0.5	-0.2	0.58	0.86	0.3
http://www.ensembl.org/Homo_sapiens/Variation/Summary?v=rs2548278	rs2548278	rs2548278	5	0.99	0.01	0	0	0.00017	0.35	0.1	0.02	T	C	0.36	http://www.ncbi.nlm.nih.gov/sites/entrez?Db=gene&Cmd=ShowDetailView&TermToSearch=7903&ordinalpos=1&itool=EntrezSystem2.PEntrez.Gene.Gene_ResultsPanel.Gene_RVDocSum	ST8SIA4	ST8SIA4	0	http://www.ncbi.nlm.nih.gov/sites/entrez?Db=gene&Cmd=ShowDetailView&TermToSearch=345757&ordinalpos=1&itool=EntrezSystem2.PEntrez.Gene.Gene_ResultsPanel.Gene_RVDocSum	TMEM157	TMEM157	243	http://www.ncbi.nlm.nih.gov/sites/entrez?Db=gene&Cmd=ShowDetailView&TermToSearch=441098&ordinalpos=1&itool=EntrezSystem2.PEntrez.Gene.Gene_ResultsPanel.Gene_RVDocSum	LOC441098	LOC441098	436	2.1	2.3	-0.5	0.5	0.00011	0.65	0.022	-0.5	-0.4	-0.5	-0.2	0.57	0.84	0.3
http://www.ensembl.org/Homo_sapiens/Variation/Summary?v=rs2548276	rs2548276	rs2548276	5	0.99	0.01	0	0	0.00015	0.32	0.1	0.03	T	C	0.35	http://www.ncbi.nlm.nih.gov/sites/entrez?Db=gene&Cmd=ShowDetailView&TermToSearch=7903&ordinalpos=1&itool=EntrezSystem2.PEntrez.Gene.Gene_ResultsPanel.Gene_RVDocSum	ST8SIA4	ST8SIA4	0	http://www.ncbi.nlm.nih.gov/sites/entrez?Db=gene&Cmd=ShowDetailView&TermToSearch=345757&ordinalpos=1&itool=EntrezSystem2.PEntrez.Gene.Gene_ResultsPanel.Gene_RVDocSum	TMEM157	TMEM157	246	http://www.ncbi.nlm.nih.gov/sites/entrez?Db=gene&Cmd=ShowDetailView&TermToSearch=441098&ordinalpos=1&itool=EntrezSystem2.PEntrez.Gene.Gene_ResultsPanel.Gene_RVDocSum	LOC441098	LOC441098	439	2.1	2.2	-0.5	0.5	0.00014	0.64	0.02	-0.5	-0.4	-0.5	-0.2	0.5	0.85	0.3
http://www.ensembl.org/Homo_sapiens/Variation/Summary?v=rs1559059	rs1559059	rs1559059	5	0.99	0.01	0	0	0.00019	0.11	0.1	0.04	A	G	0.31	http://www.ncbi.nlm.nih.gov/sites/entrez?Db=gene&Cmd=ShowDetailView&TermToSearch=7903&ordinalpos=1&itool=EntrezSystem2.PEntrez.Gene.Gene_ResultsPanel.Gene_RVDocSum	ST8SIA4	ST8SIA4	0	http://www.ncbi.nlm.nih.gov/sites/entrez?Db=gene&Cmd=ShowDetailView&TermToSearch=345757&ordinalpos=1&itool=EntrezSystem2.PEntrez.Gene.Gene_ResultsPanel.Gene_RVDocSum	TMEM157	TMEM157	247	http://www.ncbi.nlm.nih.gov/sites/entrez?Db=gene&Cmd=ShowDetailView&TermToSearch=441098&ordinalpos=1&itool=EntrezSystem2.PEntrez.Gene.Gene_ResultsPanel.Gene_RVDocSum	LOC441098	LOC441098	440	2.1	1.7	-0.4	0.5	0.00083	0.42	0.021	-0.2	-0.2	-0.4	-0.2	0.17	0.68	0.3
http://www.ensembl.org/Homo_sapiens/Variation/Summary?v=rs32479	rs32479	rs32479	5	0.97	0.03	0	0	9.8e-05	0.88	-0.13	0	C	A	0.31	http://www.ncbi.nlm.nih.gov/sites/entrez?Db=gene&Cmd=ShowDetailView&TermToSearch=7903&ordinalpos=1&itool=EntrezSystem2.PEntrez.Gene.Gene_ResultsPanel.Gene_RVDocSum	ST8SIA4	ST8SIA4	0	http://www.ncbi.nlm.nih.gov/sites/entrez?Db=gene&Cmd=ShowDetailView&TermToSearch=345757&ordinalpos=1&itool=EntrezSystem2.PEntrez.Gene.Gene_ResultsPanel.Gene_RVDocSum	TMEM157	TMEM157	250	http://www.ncbi.nlm.nih.gov/sites/entrez?Db=gene&Cmd=ShowDetailView&TermToSearch=441098&ordinalpos=1&itool=EntrezSystem2.PEntrez.Gene.Gene_ResultsPanel.Gene_RVDocSum	LOC441098	LOC441098	443	2.6	1.5	0	0.4	0.00081	0.19	0.038	-0.6	-0.4	-0.2	-0.1	0.67	0.3	0.24
http://www.ensembl.org/Homo_sapiens/Variation/Summary?v=rs2548263	rs2548263	rs2548263	5	0.98	0.01	0	0	0.00013	0.12	0.1	0.04	T	C	0.33	http://www.ncbi.nlm.nih.gov/sites/entrez?Db=gene&Cmd=ShowDetailView&TermToSearch=7903&ordinalpos=1&itool=EntrezSystem2.PEntrez.Gene.Gene_ResultsPanel.Gene_RVDocSum	ST8SIA4	ST8SIA4	0	http://www.ncbi.nlm.nih.gov/sites/entrez?Db=gene&Cmd=ShowDetailView&TermToSearch=345757&ordinalpos=1&itool=EntrezSystem2.PEntrez.Gene.Gene_ResultsPanel.Gene_RVDocSum	TMEM157	TMEM157	251	http://www.ncbi.nlm.nih.gov/sites/entrez?Db=gene&Cmd=ShowDetailView&TermToSearch=441098&ordinalpos=1&itool=EntrezSystem2.PEntrez.Gene.Gene_ResultsPanel.Gene_RVDocSum	LOC441098	LOC441098	444	2.2	1.9	-0.4	0.8	0.00043	0.67	0.0077	-0.2	-0.4	-0.4	-0.2	0.31	0.48	0.27
http://www.ensembl.org/Homo_sapiens/Variation/Summary?v=rs10078934	rs10078934	rs10078934	5	0.99	0.01	0	0	0.00017	0.11	0.1	0.04	T	A	0.3	http://www.ncbi.nlm.nih.gov/sites/entrez?Db=gene&Cmd=ShowDetailView&TermToSearch=7903&ordinalpos=1&itool=EntrezSystem2.PEntrez.Gene.Gene_ResultsPanel.Gene_RVDocSum	ST8SIA4	ST8SIA4	0	http://www.ncbi.nlm.nih.gov/sites/entrez?Db=gene&Cmd=ShowDetailView&TermToSearch=345757&ordinalpos=1&itool=EntrezSystem2.PEntrez.Gene.Gene_ResultsPanel.Gene_RVDocSum	TMEM157	TMEM157	251	http://www.ncbi.nlm.nih.gov/sites/entrez?Db=gene&Cmd=ShowDetailView&TermToSearch=441098&ordinalpos=1&itool=EntrezSystem2.PEntrez.Gene.Gene_ResultsPanel.Gene_RVDocSum	LOC441098	LOC441098	445	2.1	1.7	-0.4	0.5	0.00092	0.42	0.018	-0.2	-0.2	-0.4	-0.2	0.16	0.69	0.33
http://www.ensembl.org/Homo_sapiens/Variation/Summary?v=rs4703126	rs4703126	rs4703126	5	0.99	0.01	0	0	0.00017	0.1	0.1	0.04	T	G	0.3	http://www.ncbi.nlm.nih.gov/sites/entrez?Db=gene&Cmd=ShowDetailView&TermToSearch=7903&ordinalpos=1&itool=EntrezSystem2.PEntrez.Gene.Gene_ResultsPanel.Gene_RVDocSum	ST8SIA4	ST8SIA4	0	http://www.ncbi.nlm.nih.gov/sites/entrez?Db=gene&Cmd=ShowDetailView&TermToSearch=345757&ordinalpos=1&itool=EntrezSystem2.PEntrez.Gene.Gene_ResultsPanel.Gene_RVDocSum	TMEM157	TMEM157	252	http://www.ncbi.nlm.nih.gov/sites/entrez?Db=gene&Cmd=ShowDetailView&TermToSearch=441098&ordinalpos=1&itool=EntrezSystem2.PEntrez.Gene.Gene_ResultsPanel.Gene_RVDocSum	LOC441098	LOC441098	445	2.1	1.7	-0.4	0.5	0.00092	0.42	0.018	-0.2	-0.2	-0.4	-0.2	0.16	0.69	0.33
http://www.ensembl.org/Homo_sapiens/Variation/Summary?v=rs2548279	rs2548279	rs2548279	5	0.98	0.02	0	0	0.00012	0.12	0.1	0.04	A	G	0.33	http://www.ncbi.nlm.nih.gov/sites/entrez?Db=gene&Cmd=ShowDetailView&TermToSearch=7903&ordinalpos=1&itool=EntrezSystem2.PEntrez.Gene.Gene_ResultsPanel.Gene_RVDocSum	ST8SIA4	ST8SIA4	0	http://www.ncbi.nlm.nih.gov/sites/entrez?Db=gene&Cmd=ShowDetailView&TermToSearch=345757&ordinalpos=1&itool=EntrezSystem2.PEntrez.Gene.Gene_ResultsPanel.Gene_RVDocSum	TMEM157	TMEM157	255	http://www.ncbi.nlm.nih.gov/sites/entrez?Db=gene&Cmd=ShowDetailView&TermToSearch=441098&ordinalpos=1&itool=EntrezSystem2.PEntrez.Gene.Gene_ResultsPanel.Gene_RVDocSum	LOC441098	LOC441098	448	2.2	1.9	-0.4	0.8	0.00041	0.66	0.0077	-0.2	-0.4	-0.4	-0.2	0.31	0.5	0.28
http://www.ensembl.org/Homo_sapiens/Variation/Summary?v=rs3756350	rs3756350	rs3756350	5	0.99	0.01	0	0	0.00015	0.11	0.1	0.04	G	A	0.31	http://www.ncbi.nlm.nih.gov/sites/entrez?Db=gene&Cmd=ShowDetailView&TermToSearch=7903&ordinalpos=1&itool=EntrezSystem2.PEntrez.Gene.Gene_ResultsPanel.Gene_RVDocSum	ST8SIA4	ST8SIA4	0	http://www.ncbi.nlm.nih.gov/sites/entrez?Db=gene&Cmd=ShowDetailView&TermToSearch=345757&ordinalpos=1&itool=EntrezSystem2.PEntrez.Gene.Gene_ResultsPanel.Gene_RVDocSum	TMEM157	TMEM157	255	http://www.ncbi.nlm.nih.gov/sites/entrez?Db=gene&Cmd=ShowDetailView&TermToSearch=441098&ordinalpos=1&itool=EntrezSystem2.PEntrez.Gene.Gene_ResultsPanel.Gene_RVDocSum	LOC441098	LOC441098	449	2.2	1.7	-0.4	0.6	0.00083	0.42	0.018	-0.2	-0.2	-0.4	-0.2	0.17	0.7	0.32
http://www.ensembl.org/Homo_sapiens/Variation/Summary?v=rs3822366	rs3822366	rs3822366	5	0.99	0.01	0	0	0.00017	0.11	0.1	0.04	G	C	0.31	http://www.ncbi.nlm.nih.gov/sites/entrez?Db=gene&Cmd=ShowDetailView&TermToSearch=7903&ordinalpos=1&itool=EntrezSystem2.PEntrez.Gene.Gene_ResultsPanel.Gene_RVDocSum	ST8SIA4	ST8SIA4	0	http://www.ncbi.nlm.nih.gov/sites/entrez?Db=gene&Cmd=ShowDetailView&TermToSearch=345757&ordinalpos=1&itool=EntrezSystem2.PEntrez.Gene.Gene_ResultsPanel.Gene_RVDocSum	TMEM157	TMEM157	257	http://www.ncbi.nlm.nih.gov/sites/entrez?Db=gene&Cmd=ShowDetailView&TermToSearch=441098&ordinalpos=1&itool=EntrezSystem2.PEntrez.Gene.Gene_ResultsPanel.Gene_RVDocSum	LOC441098	LOC441098	450	2.1	1.7	-0.4	0.5	0.00089	0.43	0.02	-0.2	-0.2	-0.4	-0.2	0.15	0.72	0.32
http://www.ensembl.org/Homo_sapiens/Variation/Summary?v=rs726971	rs726971	rs726971	5	0.99	0.01	0	0	0.0002	0.1	0.1	0.04	A	G	0.31	http://www.ncbi.nlm.nih.gov/sites/entrez?Db=gene&Cmd=ShowDetailView&TermToSearch=7903&ordinalpos=1&itool=EntrezSystem2.PEntrez.Gene.Gene_ResultsPanel.Gene_RVDocSum	ST8SIA4	ST8SIA4	0	http://www.ncbi.nlm.nih.gov/sites/entrez?Db=gene&Cmd=ShowDetailView&TermToSearch=345757&ordinalpos=1&itool=EntrezSystem2.PEntrez.Gene.Gene_ResultsPanel.Gene_RVDocSum	TMEM157	TMEM157	260	http://www.ncbi.nlm.nih.gov/sites/entrez?Db=gene&Cmd=ShowDetailView&TermToSearch=441098&ordinalpos=1&itool=EntrezSystem2.PEntrez.Gene.Gene_ResultsPanel.Gene_RVDocSum	LOC441098	LOC441098	453	2.1	1.7	-0.4	0.5	0.0011	0.43	0.021	-0.2	-0.2	-0.4	-0.2	0.15	0.72	0.32
http://www.ensembl.org/Homo_sapiens/Variation/Summary?v=rs11738152	rs11738152	rs11738152	5	0.99	0.01	0	0	0.00021	0.1	0.1	0.04	G	C	0.31	http://www.ncbi.nlm.nih.gov/sites/entrez?Db=gene&Cmd=ShowDetailView&TermToSearch=7903&ordinalpos=1&itool=EntrezSystem2.PEntrez.Gene.Gene_ResultsPanel.Gene_RVDocSum	ST8SIA4	ST8SIA4	0	http://www.ncbi.nlm.nih.gov/sites/entrez?Db=gene&Cmd=ShowDetailView&TermToSearch=345757&ordinalpos=1&itool=EntrezSystem2.PEntrez.Gene.Gene_ResultsPanel.Gene_RVDocSum	TMEM157	TMEM157	261	http://www.ncbi.nlm.nih.gov/sites/entrez?Db=gene&Cmd=ShowDetailView&TermToSearch=441098&ordinalpos=1&itool=EntrezSystem2.PEntrez.Gene.Gene_ResultsPanel.Gene_RVDocSum	LOC441098	LOC441098	454	2	1.7	-0.4	0.5	0.0012	0.43	0.021	-0.2	-0.2	-0.4	-0.2	0.15	0.72	0.32
http://www.ensembl.org/Homo_sapiens/Variation/Summary?v=rs7737721	rs7737721	rs7737721	5	0.99	0.01	0	0	0.00017	0.28	0.09	0.03	G	C	0.36	http://www.ncbi.nlm.nih.gov/sites/entrez?Db=gene&Cmd=ShowDetailView&TermToSearch=7903&ordinalpos=1&itool=EntrezSystem2.PEntrez.Gene.Gene_ResultsPanel.Gene_RVDocSum	ST8SIA4	ST8SIA4	0	http://www.ncbi.nlm.nih.gov/sites/entrez?Db=gene&Cmd=ShowDetailView&TermToSearch=345757&ordinalpos=1&itool=EntrezSystem2.PEntrez.Gene.Gene_ResultsPanel.Gene_RVDocSum	TMEM157	TMEM157	273	http://www.ncbi.nlm.nih.gov/sites/entrez?Db=gene&Cmd=ShowDetailView&TermToSearch=441098&ordinalpos=1&itool=EntrezSystem2.PEntrez.Gene.Gene_ResultsPanel.Gene_RVDocSum	LOC441098	LOC441098	466	2.1	2	-0.4	0.4	0.00031	0.64	0.026	-0.5	-0.4	-0.5	-0.2	0.35	0.95	0.35
http://www.ensembl.org/Homo_sapiens/Variation/Summary?v=rs7703643	rs7703643	rs7703643	5	0.99	0.01	0	0	0.00019	0.36	0.09	0.02	T	C	0.36	http://www.ncbi.nlm.nih.gov/sites/entrez?Db=gene&Cmd=ShowDetailView&TermToSearch=7903&ordinalpos=1&itool=EntrezSystem2.PEntrez.Gene.Gene_ResultsPanel.Gene_RVDocSum	ST8SIA4	ST8SIA4	0	http://www.ncbi.nlm.nih.gov/sites/entrez?Db=gene&Cmd=ShowDetailView&TermToSearch=345757&ordinalpos=1&itool=EntrezSystem2.PEntrez.Gene.Gene_ResultsPanel.Gene_RVDocSum	TMEM157	TMEM157	286	http://www.ncbi.nlm.nih.gov/sites/entrez?Db=gene&Cmd=ShowDetailView&TermToSearch=441098&ordinalpos=1&itool=EntrezSystem2.PEntrez.Gene.Gene_ResultsPanel.Gene_RVDocSum	LOC441098	LOC441098	480	2.1	2.2	-0.5	0.4	0.00018	0.72	0.031	-0.5	-0.4	-0.5	-0.2	0.37	0.94	0.42
http://www.ensembl.org/Homo_sapiens/Variation/Summary?v=rs10043056	rs10043056	rs10043056	5	0.99	0.01	0	0	0.00018	0.13	0.09	0.04	G	A	0.32	http://www.ncbi.nlm.nih.gov/sites/entrez?Db=gene&Cmd=ShowDetailView&TermToSearch=7903&ordinalpos=1&itool=EntrezSystem2.PEntrez.Gene.Gene_ResultsPanel.Gene_RVDocSum	ST8SIA4	ST8SIA4	0	http://www.ncbi.nlm.nih.gov/sites/entrez?Db=gene&Cmd=ShowDetailView&TermToSearch=345757&ordinalpos=1&itool=EntrezSystem2.PEntrez.Gene.Gene_ResultsPanel.Gene_RVDocSum	TMEM157	TMEM157	288	http://www.ncbi.nlm.nih.gov/sites/entrez?Db=gene&Cmd=ShowDetailView&TermToSearch=441098&ordinalpos=1&itool=EntrezSystem2.PEntrez.Gene.Gene_ResultsPanel.Gene_RVDocSum	LOC441098	LOC441098	482	2.1	1.8	-0.4	0.6	0.0007	0.51	0.017	-0.3	-0.3	-0.5	-0.2	0.19	0.73	0.32
http://www.ensembl.org/Homo_sapiens/Variation/Summary?v=rs3776170	rs3776170	rs3776170	5	0.99	0.01	0	0	0.00013	0.35	0.1	0.02	C	T	0.37	http://www.ncbi.nlm.nih.gov/sites/entrez?Db=gene&Cmd=ShowDetailView&TermToSearch=7903&ordinalpos=1&itool=EntrezSystem2.PEntrez.Gene.Gene_ResultsPanel.Gene_RVDocSum	ST8SIA4	ST8SIA4	0	http://www.ncbi.nlm.nih.gov/sites/entrez?Db=gene&Cmd=ShowDetailView&TermToSearch=345757&ordinalpos=1&itool=EntrezSystem2.PEntrez.Gene.Gene_ResultsPanel.Gene_RVDocSum	TMEM157	TMEM157	289	http://www.ncbi.nlm.nih.gov/sites/entrez?Db=gene&Cmd=ShowDetailView&TermToSearch=441098&ordinalpos=1&itool=EntrezSystem2.PEntrez.Gene.Gene_ResultsPanel.Gene_RVDocSum	LOC441098	LOC441098	482	2.2	2.2	-0.5	0.4	0.00014	0.7	0.027	-0.5	-0.5	-0.5	-0.2	0.4	0.97	0.36
http://www.ensembl.org/Homo_sapiens/Variation/Summary?v=rs3776171	rs3776171	rs3776171	5	0.99	0.01	0	0	0.00015	0.33	0.1	0.02	A	G	0.34	http://www.ncbi.nlm.nih.gov/sites/entrez?Db=gene&Cmd=ShowDetailView&TermToSearch=7903&ordinalpos=1&itool=EntrezSystem2.PEntrez.Gene.Gene_ResultsPanel.Gene_RVDocSum	ST8SIA4	ST8SIA4	0	http://www.ncbi.nlm.nih.gov/sites/entrez?Db=gene&Cmd=ShowDetailView&TermToSearch=345757&ordinalpos=1&itool=EntrezSystem2.PEntrez.Gene.Gene_ResultsPanel.Gene_RVDocSum	TMEM157	TMEM157	290	http://www.ncbi.nlm.nih.gov/sites/entrez?Db=gene&Cmd=ShowDetailView&TermToSearch=441098&ordinalpos=1&itool=EntrezSystem2.PEntrez.Gene.Gene_ResultsPanel.Gene_RVDocSum	LOC441098	LOC441098	483	2.1	2	-0.4	0.3	0.00025	0.5	0.05	-0.5	-0.4	-0.5	-0.2	0.29	0.81	0.39
http://www.ensembl.org/Homo_sapiens/Variation/Summary?v=rs13355889	rs13355889	rs13355889	5	0.99	0.01	0	0	0.00017	0.13	0.09	0.04	A	G	0.31	http://www.ncbi.nlm.nih.gov/sites/entrez?Db=gene&Cmd=ShowDetailView&TermToSearch=7903&ordinalpos=1&itool=EntrezSystem2.PEntrez.Gene.Gene_ResultsPanel.Gene_RVDocSum	ST8SIA4	ST8SIA4	0	http://www.ncbi.nlm.nih.gov/sites/entrez?Db=gene&Cmd=ShowDetailView&TermToSearch=345757&ordinalpos=1&itool=EntrezSystem2.PEntrez.Gene.Gene_ResultsPanel.Gene_RVDocSum	TMEM157	TMEM157	292	http://www.ncbi.nlm.nih.gov/sites/entrez?Db=gene&Cmd=ShowDetailView&TermToSearch=441098&ordinalpos=1&itool=EntrezSystem2.PEntrez.Gene.Gene_ResultsPanel.Gene_RVDocSum	LOC441098	LOC441098	486	2.1	1.8	-0.4	0.5	0.00067	0.48	0.02	-0.3	-0.3	-0.5	-0.2	0.21	0.7	0.31
http://www.ensembl.org/Homo_sapiens/Variation/Summary?v=rs11241752	rs11241752	rs11241752	5	0.99	0.01	0	0	0.00017	0.15	0.09	0.04	T	C	0.31	http://www.ncbi.nlm.nih.gov/sites/entrez?Db=gene&Cmd=ShowDetailView&TermToSearch=7903&ordinalpos=1&itool=EntrezSystem2.PEntrez.Gene.Gene_ResultsPanel.Gene_RVDocSum	ST8SIA4	ST8SIA4	0	http://www.ncbi.nlm.nih.gov/sites/entrez?Db=gene&Cmd=ShowDetailView&TermToSearch=345757&ordinalpos=1&itool=EntrezSystem2.PEntrez.Gene.Gene_ResultsPanel.Gene_RVDocSum	TMEM157	TMEM157	298	http://www.ncbi.nlm.nih.gov/sites/entrez?Db=gene&Cmd=ShowDetailView&TermToSearch=441098&ordinalpos=1&itool=EntrezSystem2.PEntrez.Gene.Gene_ResultsPanel.Gene_RVDocSum	LOC441098	LOC441098	491	2.1	1.8	-0.4	0.6	0.00063	0.51	0.016	-0.3	-0.3	-0.5	-0.2	0.21	0.75	0.34
http://www.ensembl.org/Homo_sapiens/Variation/Summary?v=rs1423380	rs1423380	rs1423380	5	0.98	0.02	0	0	9.3e-05	0.41	0.09	0.02	C	T	0.36	http://www.ncbi.nlm.nih.gov/sites/entrez?Db=gene&Cmd=ShowDetailView&TermToSearch=7903&ordinalpos=1&itool=EntrezSystem2.PEntrez.Gene.Gene_ResultsPanel.Gene_RVDocSum	ST8SIA4	ST8SIA4	0	http://www.ncbi.nlm.nih.gov/sites/entrez?Db=gene&Cmd=ShowDetailView&TermToSearch=345757&ordinalpos=1&itool=EntrezSystem2.PEntrez.Gene.Gene_ResultsPanel.Gene_RVDocSum	TMEM157	TMEM157	299	http://www.ncbi.nlm.nih.gov/sites/entrez?Db=gene&Cmd=ShowDetailView&TermToSearch=441098&ordinalpos=1&itool=EntrezSystem2.PEntrez.Gene.Gene_ResultsPanel.Gene_RVDocSum	LOC441098	LOC441098	492	2.3	2.3	-0.5	0.4	0.00012	0.7	0.027	-0.6	-0.5	-0.5	-0.2	0.47	0.94	0.37
http://www.ensembl.org/Homo_sapiens/Variation/Summary?v=rs11241755	rs11241755	rs11241755	5	0.99	0.01	0	0	0.00014	0.14	0.1	0.04	A	G	0.31	http://www.ncbi.nlm.nih.gov/sites/entrez?Db=gene&Cmd=ShowDetailView&TermToSearch=7903&ordinalpos=1&itool=EntrezSystem2.PEntrez.Gene.Gene_ResultsPanel.Gene_RVDocSum	ST8SIA4	ST8SIA4	0	http://www.ncbi.nlm.nih.gov/sites/entrez?Db=gene&Cmd=ShowDetailView&TermToSearch=345757&ordinalpos=1&itool=EntrezSystem2.PEntrez.Gene.Gene_ResultsPanel.Gene_RVDocSum	TMEM157	TMEM157	299	http://www.ncbi.nlm.nih.gov/sites/entrez?Db=gene&Cmd=ShowDetailView&TermToSearch=441098&ordinalpos=1&itool=EntrezSystem2.PEntrez.Gene.Gene_ResultsPanel.Gene_RVDocSum	LOC441098	LOC441098	492	2.2	1.8	-0.4	0.6	0.00059	0.49	0.017	-0.3	-0.3	-0.5	-0.2	0.19	0.74	0.35
http://www.ensembl.org/Homo_sapiens/Variation/Summary?v=rs2400313	rs2400313	rs2400313	5	0.98	0.01	0	0	0.00012	0.16	0.1	0.03	T	C	0.32	http://www.ncbi.nlm.nih.gov/sites/entrez?Db=gene&Cmd=ShowDetailView&TermToSearch=7903&ordinalpos=1&itool=EntrezSystem2.PEntrez.Gene.Gene_ResultsPanel.Gene_RVDocSum	ST8SIA4	ST8SIA4	0	http://www.ncbi.nlm.nih.gov/sites/entrez?Db=gene&Cmd=ShowDetailView&TermToSearch=345757&ordinalpos=1&itool=EntrezSystem2.PEntrez.Gene.Gene_ResultsPanel.Gene_RVDocSum	TMEM157	TMEM157	304	http://www.ncbi.nlm.nih.gov/sites/entrez?Db=gene&Cmd=ShowDetailView&TermToSearch=441098&ordinalpos=1&itool=EntrezSystem2.PEntrez.Gene.Gene_ResultsPanel.Gene_RVDocSum	LOC441098	LOC441098	498	2.2	1.9	-0.4	0.6	0.00048	0.5	0.015	-0.4	-0.3	-0.5	-0.2	0.22	0.77	0.39
http://www.ensembl.org/Homo_sapiens/Variation/Summary?v=rs17725452	rs17725452	rs17725452	5	0.98	0.01	0	0	0.00012	0.17	0.1	0.03	T	A	0.32	http://www.ncbi.nlm.nih.gov/sites/entrez?Db=gene&Cmd=ShowDetailView&TermToSearch=7903&ordinalpos=1&itool=EntrezSystem2.PEntrez.Gene.Gene_ResultsPanel.Gene_RVDocSum	ST8SIA4	ST8SIA4	0	http://www.ncbi.nlm.nih.gov/sites/entrez?Db=gene&Cmd=ShowDetailView&TermToSearch=345757&ordinalpos=1&itool=EntrezSystem2.PEntrez.Gene.Gene_ResultsPanel.Gene_RVDocSum	TMEM157	TMEM157	308	http://www.ncbi.nlm.nih.gov/sites/entrez?Db=gene&Cmd=ShowDetailView&TermToSearch=441098&ordinalpos=1&itool=EntrezSystem2.PEntrez.Gene.Gene_ResultsPanel.Gene_RVDocSum	LOC441098	LOC441098	501	2.2	1.9	-0.4	0.6	0.00047	0.5	0.015	-0.4	-0.3	-0.5	-0.2	0.22	0.77	0.39
http://www.ensembl.org/Homo_sapiens/Variation/Summary?v=rs3776176	rs3776176	rs3776176	5	0.98	0.02	0	0	7.9e-05	0.42	0.1	0.02	C	A	0.37	http://www.ncbi.nlm.nih.gov/sites/entrez?Db=gene&Cmd=ShowDetailView&TermToSearch=7903&ordinalpos=1&itool=EntrezSystem2.PEntrez.Gene.Gene_ResultsPanel.Gene_RVDocSum	ST8SIA4	ST8SIA4	0	http://www.ncbi.nlm.nih.gov/sites/entrez?Db=gene&Cmd=ShowDetailView&TermToSearch=345757&ordinalpos=1&itool=EntrezSystem2.PEntrez.Gene.Gene_ResultsPanel.Gene_RVDocSum	TMEM157	TMEM157	310	http://www.ncbi.nlm.nih.gov/sites/entrez?Db=gene&Cmd=ShowDetailView&TermToSearch=441098&ordinalpos=1&itool=EntrezSystem2.PEntrez.Gene.Gene_ResultsPanel.Gene_RVDocSum	LOC441098	LOC441098	503	2.4	2.4	-0.5	0.4	8.4e-05	0.71	0.028	-0.6	-0.5	-0.5	-0.2	0.45	0.91	0.4
http://www.ensembl.org/Homo_sapiens/Variation/Summary?v=rs1423384	rs1423384	rs1423384	5	0.98	0.02	0	0	8.6e-05	0.18	0.1	0.03	T	C	0.34	http://www.ncbi.nlm.nih.gov/sites/entrez?Db=gene&Cmd=ShowDetailView&TermToSearch=7903&ordinalpos=1&itool=EntrezSystem2.PEntrez.Gene.Gene_ResultsPanel.Gene_RVDocSum	ST8SIA4	ST8SIA4	0	http://www.ncbi.nlm.nih.gov/sites/entrez?Db=gene&Cmd=ShowDetailView&TermToSearch=345757&ordinalpos=1&itool=EntrezSystem2.PEntrez.Gene.Gene_ResultsPanel.Gene_RVDocSum	TMEM157	TMEM157	312	http://www.ncbi.nlm.nih.gov/sites/entrez?Db=gene&Cmd=ShowDetailView&TermToSearch=441098&ordinalpos=1&itool=EntrezSystem2.PEntrez.Gene.Gene_ResultsPanel.Gene_RVDocSum	LOC441098	LOC441098	505	2.4	2.2	-0.5	0.8	0.00018	0.75	0.0073	-0.4	-0.4	-0.4	-0.2	0.34	0.66	0.32
http://www.ensembl.org/Homo_sapiens/Variation/Summary?v=rs3756352	rs3756352	rs3756352	5	0.98	0.01	0	0	0.00012	0.17	0.1	0.03	A	G	0.32	http://www.ncbi.nlm.nih.gov/sites/entrez?Db=gene&Cmd=ShowDetailView&TermToSearch=7903&ordinalpos=1&itool=EntrezSystem2.PEntrez.Gene.Gene_ResultsPanel.Gene_RVDocSum	ST8SIA4	ST8SIA4	0	http://www.ncbi.nlm.nih.gov/sites/entrez?Db=gene&Cmd=ShowDetailView&TermToSearch=345757&ordinalpos=1&itool=EntrezSystem2.PEntrez.Gene.Gene_ResultsPanel.Gene_RVDocSum	TMEM157	TMEM157	314	http://www.ncbi.nlm.nih.gov/sites/entrez?Db=gene&Cmd=ShowDetailView&TermToSearch=441098&ordinalpos=1&itool=EntrezSystem2.PEntrez.Gene.Gene_ResultsPanel.Gene_RVDocSum	LOC441098	LOC441098	508	2.2	1.9	-0.4	0.6	0.00046	0.5	0.015	-0.4	-0.3	-0.5	-0.3	0.21	0.78	0.4
http://www.ensembl.org/Homo_sapiens/Variation/Summary?v=rs1428439	rs1428439	rs1428439	5	0.98	0.02	0	0	9.7e-05	0.38	0.1	0.02	G	A	0.35	http://www.ncbi.nlm.nih.gov/sites/entrez?Db=gene&Cmd=ShowDetailView&TermToSearch=7903&ordinalpos=1&itool=EntrezSystem2.PEntrez.Gene.Gene_ResultsPanel.Gene_RVDocSum	ST8SIA4	ST8SIA4	0	http://www.ncbi.nlm.nih.gov/sites/entrez?Db=gene&Cmd=ShowDetailView&TermToSearch=345757&ordinalpos=1&itool=EntrezSystem2.PEntrez.Gene.Gene_ResultsPanel.Gene_RVDocSum	TMEM157	TMEM157	316	http://www.ncbi.nlm.nih.gov/sites/entrez?Db=gene&Cmd=ShowDetailView&TermToSearch=441098&ordinalpos=1&itool=EntrezSystem2.PEntrez.Gene.Gene_ResultsPanel.Gene_RVDocSum	LOC441098	LOC441098	510	2.3	2.1	-0.4	0.3	0.00017	0.48	0.047	-0.6	-0.4	-0.5	-0.3	0.28	0.76	0.49
http://www.ensembl.org/Homo_sapiens/Variation/Summary?v=rs3756353	rs3756353	rs3756353	5	0.98	0.02	0	0	0.0001	0.18	0.1	0.03	T	C	0.32	http://www.ncbi.nlm.nih.gov/sites/entrez?Db=gene&Cmd=ShowDetailView&TermToSearch=7903&ordinalpos=1&itool=EntrezSystem2.PEntrez.Gene.Gene_ResultsPanel.Gene_RVDocSum	ST8SIA4	ST8SIA4	0	http://www.ncbi.nlm.nih.gov/sites/entrez?Db=gene&Cmd=ShowDetailView&TermToSearch=345757&ordinalpos=1&itool=EntrezSystem2.PEntrez.Gene.Gene_ResultsPanel.Gene_RVDocSum	TMEM157	TMEM157	317	http://www.ncbi.nlm.nih.gov/sites/entrez?Db=gene&Cmd=ShowDetailView&TermToSearch=441098&ordinalpos=1&itool=EntrezSystem2.PEntrez.Gene.Gene_ResultsPanel.Gene_RVDocSum	LOC441098	LOC441098	510	2.3	1.9	-0.4	0.6	0.00041	0.48	0.016	-0.4	-0.3	-0.5	-0.3	0.21	0.79	0.46
http://www.ensembl.org/Homo_sapiens/Variation/Summary?v=rs3756355	rs3756355	rs3756355	5	0.98	0.02	0	0	0.0001	0.18	0.1	0.03	G	A	0.32	http://www.ncbi.nlm.nih.gov/sites/entrez?Db=gene&Cmd=ShowDetailView&TermToSearch=7903&ordinalpos=1&itool=EntrezSystem2.PEntrez.Gene.Gene_ResultsPanel.Gene_RVDocSum	ST8SIA4	ST8SIA4	1	http://www.ncbi.nlm.nih.gov/sites/entrez?Db=gene&Cmd=ShowDetailView&TermToSearch=345757&ordinalpos=1&itool=EntrezSystem2.PEntrez.Gene.Gene_ResultsPanel.Gene_RVDocSum	TMEM157	TMEM157	318	http://www.ncbi.nlm.nih.gov/sites/entrez?Db=gene&Cmd=ShowDetailView&TermToSearch=441098&ordinalpos=1&itool=EntrezSystem2.PEntrez.Gene.Gene_ResultsPanel.Gene_RVDocSum	LOC441098	LOC441098	511	2.3	1.9	-0.4	0.6	0.00043	0.47	0.016	-0.4	-0.3	-0.5	-0.3	0.21	0.79	0.48
http://www.ensembl.org/Homo_sapiens/Variation/Summary?v=rs1833862	rs1833862	rs1833862	5	0.98	0.02	0	0	0.00011	0.19	0.1	0.03	C	T	0.32	http://www.ncbi.nlm.nih.gov/sites/entrez?Db=gene&Cmd=ShowDetailView&TermToSearch=7903&ordinalpos=1&itool=EntrezSystem2.PEntrez.Gene.Gene_ResultsPanel.Gene_RVDocSum	ST8SIA4	ST8SIA4	5	http://www.ncbi.nlm.nih.gov/sites/entrez?Db=gene&Cmd=ShowDetailView&TermToSearch=345757&ordinalpos=1&itool=EntrezSystem2.PEntrez.Gene.Gene_ResultsPanel.Gene_RVDocSum	TMEM157	TMEM157	321	http://www.ncbi.nlm.nih.gov/sites/entrez?Db=gene&Cmd=ShowDetailView&TermToSearch=441098&ordinalpos=1&itool=EntrezSystem2.PEntrez.Gene.Gene_ResultsPanel.Gene_RVDocSum	LOC441098	LOC441098	514	2.2	1.9	-0.4	0.6	0.00042	0.47	0.016	-0.4	-0.3	-0.5	-0.3	0.22	0.8	0.49
http://www.ensembl.org/Homo_sapiens/Variation/Summary?v=rs4703131	rs4703131	rs4703131	5	0.98	0.02	0	0	9e-05	0.2	0.1	0.03	C	T	0.32	http://www.ncbi.nlm.nih.gov/sites/entrez?Db=gene&Cmd=ShowDetailView&TermToSearch=7903&ordinalpos=1&itool=EntrezSystem2.PEntrez.Gene.Gene_ResultsPanel.Gene_RVDocSum	ST8SIA4	ST8SIA4	10	http://www.ncbi.nlm.nih.gov/sites/entrez?Db=gene&Cmd=ShowDetailView&TermToSearch=345757&ordinalpos=1&itool=EntrezSystem2.PEntrez.Gene.Gene_ResultsPanel.Gene_RVDocSum	TMEM157	TMEM157	326	http://www.ncbi.nlm.nih.gov/sites/entrez?Db=gene&Cmd=ShowDetailView&TermToSearch=441098&ordinalpos=1&itool=EntrezSystem2.PEntrez.Gene.Gene_ResultsPanel.Gene_RVDocSum	LOC441098	LOC441098	520	2.3	1.9	-0.4	0.6	0.00038	0.45	0.016	-0.4	-0.3	-0.5	-0.3	0.21	0.81	0.53
http://www.ensembl.org/Homo_sapiens/Variation/Summary?v=rs17782250	rs17782250	rs17782250	5	0.98	0.02	0	0	7.9e-05	0.44	0.1	0.02	A	T	0.34	http://www.ncbi.nlm.nih.gov/sites/entrez?Db=gene&Cmd=ShowDetailView&TermToSearch=7903&ordinalpos=1&itool=EntrezSystem2.PEntrez.Gene.Gene_ResultsPanel.Gene_RVDocSum	ST8SIA4	ST8SIA4	10	http://www.ncbi.nlm.nih.gov/sites/entrez?Db=gene&Cmd=ShowDetailView&TermToSearch=345757&ordinalpos=1&itool=EntrezSystem2.PEntrez.Gene.Gene_ResultsPanel.Gene_RVDocSum	TMEM157	TMEM157	327	http://www.ncbi.nlm.nih.gov/sites/entrez?Db=gene&Cmd=ShowDetailView&TermToSearch=441098&ordinalpos=1&itool=EntrezSystem2.PEntrez.Gene.Gene_ResultsPanel.Gene_RVDocSum	LOC441098	LOC441098	520	2.4	2.2	-0.4	0.3	0.00015	0.43	0.046	-0.6	-0.4	-0.5	-0.3	0.28	0.74	0.64
http://www.ensembl.org/Homo_sapiens/Variation/Summary?v=rs10214216	rs10214216	rs10214216	5	0.98	0.02	0	0	7.7e-05	0.45	0.1	0.02	T	C	0.34	http://www.ncbi.nlm.nih.gov/sites/entrez?Db=gene&Cmd=ShowDetailView&TermToSearch=7903&ordinalpos=1&itool=EntrezSystem2.PEntrez.Gene.Gene_ResultsPanel.Gene_RVDocSum	ST8SIA4	ST8SIA4	11	http://www.ncbi.nlm.nih.gov/sites/entrez?Db=gene&Cmd=ShowDetailView&TermToSearch=345757&ordinalpos=1&itool=EntrezSystem2.PEntrez.Gene.Gene_ResultsPanel.Gene_RVDocSum	TMEM157	TMEM157	327	http://www.ncbi.nlm.nih.gov/sites/entrez?Db=gene&Cmd=ShowDetailView&TermToSearch=441098&ordinalpos=1&itool=EntrezSystem2.PEntrez.Gene.Gene_ResultsPanel.Gene_RVDocSum	LOC441098	LOC441098	521	2.4	2.2	-0.4	0.3	0.00016	0.43	0.045	-0.6	-0.4	-0.5	-0.3	0.28	0.75	0.69
http://www.ensembl.org/Homo_sapiens/Variation/Summary?v=rs4702993	rs4702993	rs4702993	5	0.98	0.02	0	0	7.7e-05	0.46	0.1	0.02	G	A	0.34	http://www.ncbi.nlm.nih.gov/sites/entrez?Db=gene&Cmd=ShowDetailView&TermToSearch=7903&ordinalpos=1&itool=EntrezSystem2.PEntrez.Gene.Gene_ResultsPanel.Gene_RVDocSum	ST8SIA4	ST8SIA4	15	http://www.ncbi.nlm.nih.gov/sites/entrez?Db=gene&Cmd=ShowDetailView&TermToSearch=345757&ordinalpos=1&itool=EntrezSystem2.PEntrez.Gene.Gene_ResultsPanel.Gene_RVDocSum	TMEM157	TMEM157	332	http://www.ncbi.nlm.nih.gov/sites/entrez?Db=gene&Cmd=ShowDetailView&TermToSearch=441098&ordinalpos=1&itool=EntrezSystem2.PEntrez.Gene.Gene_ResultsPanel.Gene_RVDocSum	LOC441098	LOC441098	525	2.4	2.2	-0.4	0.3	0.00016	0.42	0.045	-0.6	-0.4	-0.5	-0.3	0.28	0.75	0.69
http://www.ensembl.org/Homo_sapiens/Variation/Summary?v=rs10059470	rs10059470	rs10059470	5	0.98	0.02	0	0	7.7e-05	0.46	0.1	0.02	T	A	0.34	http://www.ncbi.nlm.nih.gov/sites/entrez?Db=gene&Cmd=ShowDetailView&TermToSearch=7903&ordinalpos=1&itool=EntrezSystem2.PEntrez.Gene.Gene_ResultsPanel.Gene_RVDocSum	ST8SIA4	ST8SIA4	20	http://www.ncbi.nlm.nih.gov/sites/entrez?Db=gene&Cmd=ShowDetailView&TermToSearch=345757&ordinalpos=1&itool=EntrezSystem2.PEntrez.Gene.Gene_ResultsPanel.Gene_RVDocSum	TMEM157	TMEM157	337	http://www.ncbi.nlm.nih.gov/sites/entrez?Db=gene&Cmd=ShowDetailView&TermToSearch=441098&ordinalpos=1&itool=EntrezSystem2.PEntrez.Gene.Gene_ResultsPanel.Gene_RVDocSum	LOC441098	LOC441098	530	2.4	2.2	-0.4	0.3	0.00016	0.42	0.044	-0.6	-0.4	-0.5	-0.3	0.28	0.75	0.7
http://www.ensembl.org/Homo_sapiens/Variation/Summary?v=rs11742323	rs11742323	rs11742323	5	0.96	0.04	0	0	5.2e-05	0.2	0.1	0.03	T	C	0.39	http://www.ncbi.nlm.nih.gov/sites/entrez?Db=gene&Cmd=ShowDetailView&TermToSearch=7903&ordinalpos=1&itool=EntrezSystem2.PEntrez.Gene.Gene_ResultsPanel.Gene_RVDocSum	ST8SIA4	ST8SIA4	25	http://www.ncbi.nlm.nih.gov/sites/entrez?Db=gene&Cmd=ShowDetailView&TermToSearch=345757&ordinalpos=1&itool=EntrezSystem2.PEntrez.Gene.Gene_ResultsPanel.Gene_RVDocSum	TMEM157	TMEM157	341	http://www.ncbi.nlm.nih.gov/sites/entrez?Db=gene&Cmd=ShowDetailView&TermToSearch=441098&ordinalpos=1&itool=EntrezSystem2.PEntrez.Gene.Gene_ResultsPanel.Gene_RVDocSum	LOC441098	LOC441098	535	2.6	1.7	0	0.2	0.00064	0.11	0.051	-0.4	-0.1	-0.5	-0.4	0.12	0.57	0.86
http://www.ensembl.org/Homo_sapiens/Variation/Summary?v=rs11748772	rs11748772	rs11748772	5	0.98	0.02	0	0	9.4e-05	0.26	0.1	0.03	A	G	0.31	http://www.ncbi.nlm.nih.gov/sites/entrez?Db=gene&Cmd=ShowDetailView&TermToSearch=7903&ordinalpos=1&itool=EntrezSystem2.PEntrez.Gene.Gene_ResultsPanel.Gene_RVDocSum	ST8SIA4	ST8SIA4	25	http://www.ncbi.nlm.nih.gov/sites/entrez?Db=gene&Cmd=ShowDetailView&TermToSearch=345757&ordinalpos=1&itool=EntrezSystem2.PEntrez.Gene.Gene_ResultsPanel.Gene_RVDocSum	TMEM157	TMEM157	341	http://www.ncbi.nlm.nih.gov/sites/entrez?Db=gene&Cmd=ShowDetailView&TermToSearch=441098&ordinalpos=1&itool=EntrezSystem2.PEntrez.Gene.Gene_ResultsPanel.Gene_RVDocSum	LOC441098	LOC441098	535	2.3	1.9	-0.4	0.6	0.00048	0.41	0.017	-0.5	-0.3	-0.5	-0.3	0.21	0.87	0.72
http://www.ensembl.org/Homo_sapiens/Variation/Summary?v=rs10515303	rs10515303	rs10515303	5	0.98	0.02	0	0	7.5e-05	0.26	0.1	0.03	T	C	0.32	http://www.ncbi.nlm.nih.gov/sites/entrez?Db=gene&Cmd=ShowDetailView&TermToSearch=7903&ordinalpos=1&itool=EntrezSystem2.PEntrez.Gene.Gene_ResultsPanel.Gene_RVDocSum	ST8SIA4	ST8SIA4	36	http://www.ncbi.nlm.nih.gov/sites/entrez?Db=gene&Cmd=ShowDetailView&TermToSearch=345757&ordinalpos=1&itool=EntrezSystem2.PEntrez.Gene.Gene_ResultsPanel.Gene_RVDocSum	TMEM157	TMEM157	353	http://www.ncbi.nlm.nih.gov/sites/entrez?Db=gene&Cmd=ShowDetailView&TermToSearch=441098&ordinalpos=1&itool=EntrezSystem2.PEntrez.Gene.Gene_ResultsPanel.Gene_RVDocSum	LOC441098	LOC441098	546	2.4	1.8	-0.4	0.7	0.00048	0.39	0.013	-0.5	-0.3	-0.5	-0.3	0.21	0.94	0.64
http://www.ensembl.org/Homo_sapiens/Variation/Summary?v=rs17726244	rs17726244	rs17726244	5	0.95	0.05	0	0	2.6e-05	0.47	0.11	0.02	T	C	0.38	http://www.ncbi.nlm.nih.gov/sites/entrez?Db=gene&Cmd=ShowDetailView&TermToSearch=7903&ordinalpos=1&itool=EntrezSystem2.PEntrez.Gene.Gene_ResultsPanel.Gene_RVDocSum	ST8SIA4	ST8SIA4	38	http://www.ncbi.nlm.nih.gov/sites/entrez?Db=gene&Cmd=ShowDetailView&TermToSearch=345757&ordinalpos=1&itool=EntrezSystem2.PEntrez.Gene.Gene_ResultsPanel.Gene_RVDocSum	TMEM157	TMEM157	355	http://www.ncbi.nlm.nih.gov/sites/entrez?Db=gene&Cmd=ShowDetailView&TermToSearch=441098&ordinalpos=1&itool=EntrezSystem2.PEntrez.Gene.Gene_ResultsPanel.Gene_RVDocSum	LOC441098	LOC441098	548	2.8	2.4	-0.4	0.6	6.7e-05	0.51	0.017	-0.6	-0.4	-0.5	-0.3	0.4	0.77	0.5
http://www.ensembl.org/Homo_sapiens/Variation/Summary?v=rs17726346	rs17726346	rs17726346	5	0.98	0.02	0	0	8.9e-05	0.23	0.1	0.03	C	A	0.32	http://www.ncbi.nlm.nih.gov/sites/entrez?Db=gene&Cmd=ShowDetailView&TermToSearch=7903&ordinalpos=1&itool=EntrezSystem2.PEntrez.Gene.Gene_ResultsPanel.Gene_RVDocSum	ST8SIA4	ST8SIA4	41	http://www.ncbi.nlm.nih.gov/sites/entrez?Db=gene&Cmd=ShowDetailView&TermToSearch=345757&ordinalpos=1&itool=EntrezSystem2.PEntrez.Gene.Gene_ResultsPanel.Gene_RVDocSum	TMEM157	TMEM157	358	http://www.ncbi.nlm.nih.gov/sites/entrez?Db=gene&Cmd=ShowDetailView&TermToSearch=441098&ordinalpos=1&itool=EntrezSystem2.PEntrez.Gene.Gene_ResultsPanel.Gene_RVDocSum	LOC441098	LOC441098	551	2.3	1.7	-0.4	0.7	0.00071	0.39	0.012	-0.4	-0.3	-0.5	-0.3	0.2	0.93	0.56
http://www.ensembl.org/Homo_sapiens/Variation/Summary?v=rs1895466	rs1895466	rs1895466	5	0.99	0.01	0	0	0.00029	0.22	-0.09	-0.03	C	T	0.33	http://www.ncbi.nlm.nih.gov/sites/entrez?Db=gene&Cmd=ShowDetailView&TermToSearch=7903&ordinalpos=1&itool=EntrezSystem2.PEntrez.Gene.Gene_ResultsPanel.Gene_RVDocSum	ST8SIA4	ST8SIA4	69	http://www.ncbi.nlm.nih.gov/sites/entrez?Db=gene&Cmd=ShowDetailView&TermToSearch=345757&ordinalpos=1&itool=EntrezSystem2.PEntrez.Gene.Gene_ResultsPanel.Gene_RVDocSum	TMEM157	TMEM157	385	http://www.ncbi.nlm.nih.gov/sites/entrez?Db=gene&Cmd=ShowDetailView&TermToSearch=441098&ordinalpos=1&itool=EntrezSystem2.PEntrez.Gene.Gene_ResultsPanel.Gene_RVDocSum	LOC441098	LOC441098	579	2.1	0.6	0	0.7	0.014	0.11	0.013	-0.3	-0.1	-0.3	0	0.12	0.35	0.12
http://www.ensembl.org/Homo_sapiens/Variation/Summary?v=rs2216614	rs2216614	rs2216614	5	0.99	0.01	0	0	0.00018	0.2	0.09	0.03	G	A	0.36	http://www.ncbi.nlm.nih.gov/sites/entrez?Db=gene&Cmd=ShowDetailView&TermToSearch=7903&ordinalpos=1&itool=EntrezSystem2.PEntrez.Gene.Gene_ResultsPanel.Gene_RVDocSum	ST8SIA4	ST8SIA4	70	http://www.ncbi.nlm.nih.gov/sites/entrez?Db=gene&Cmd=ShowDetailView&TermToSearch=345757&ordinalpos=1&itool=EntrezSystem2.PEntrez.Gene.Gene_ResultsPanel.Gene_RVDocSum	TMEM157	TMEM157	387	http://www.ncbi.nlm.nih.gov/sites/entrez?Db=gene&Cmd=ShowDetailView&TermToSearch=441098&ordinalpos=1&itool=EntrezSystem2.PEntrez.Gene.Gene_ResultsPanel.Gene_RVDocSum	LOC441098	LOC441098	580	2.1	1.2	-0.2	0.2	0.0024	0.17	0.046	-0.4	-0.1	-0.5	-0.2	0.11	0.69	0.39
http://www.ensembl.org/Homo_sapiens/Variation/Summary?v=rs3995468	rs3995468	rs3995468	5	0.99	0.01	0	0	0.0002	0.21	0.09	0.03	C	T	0.36	http://www.ncbi.nlm.nih.gov/sites/entrez?Db=gene&Cmd=ShowDetailView&TermToSearch=7903&ordinalpos=1&itool=EntrezSystem2.PEntrez.Gene.Gene_ResultsPanel.Gene_RVDocSum	ST8SIA4	ST8SIA4	75	http://www.ncbi.nlm.nih.gov/sites/entrez?Db=gene&Cmd=ShowDetailView&TermToSearch=345757&ordinalpos=1&itool=EntrezSystem2.PEntrez.Gene.Gene_ResultsPanel.Gene_RVDocSum	TMEM157	TMEM157	392	http://www.ncbi.nlm.nih.gov/sites/entrez?Db=gene&Cmd=ShowDetailView&TermToSearch=441098&ordinalpos=1&itool=EntrezSystem2.PEntrez.Gene.Gene_ResultsPanel.Gene_RVDocSum	LOC441098	LOC441098	585	2.1	1.2	-0.2	0.2	0.0024	0.19	0.048	-0.5	-0.1	-0.5	-0.2	0.11	0.68	0.4
http://www.ensembl.org/Homo_sapiens/Variation/Summary?v=rs28182	rs28182	rs28182	5	0.98	0.02	0	0	0.0001	0.27	0.11	-0.03	G	A	0.37	http://www.ncbi.nlm.nih.gov/sites/entrez?Db=gene&Cmd=ShowDetailView&TermToSearch=455&ordinalpos=1&itool=EntrezSystem2.PEntrez.Gene.Gene_ResultsPanel.Gene_RVDocSum	ASSP10	ASSP10	91	http://www.ncbi.nlm.nih.gov/sites/entrez?Db=gene&Cmd=ShowDetailView&TermToSearch=650866&ordinalpos=1&itool=EntrezSystem2.PEntrez.Gene.Gene_ResultsPanel.Gene_RVDocSum	LOC650866	LOC650866	407	http://www.ncbi.nlm.nih.gov/sites/entrez?Db=gene&Cmd=ShowDetailView&TermToSearch=153768&ordinalpos=1&itool=EntrezSystem2.PEntrez.Gene.Gene_ResultsPanel.Gene_RVDocSum	MGC21644	MGC21644	437	2.3	0	1.6	0.2	0.1	0.00057	0.054	-0.4	-0.4	-0.2	-0.3	0.42	0.26	0.75
http://www.ensembl.org/Homo_sapiens/Variation/Summary?v=rs26155	rs26155	rs26155	5	0.98	0.02	0	0	0.0001	0.27	0.11	-0.03	G	A	0.37	http://www.ncbi.nlm.nih.gov/sites/entrez?Db=gene&Cmd=ShowDetailView&TermToSearch=455&ordinalpos=1&itool=EntrezSystem2.PEntrez.Gene.Gene_ResultsPanel.Gene_RVDocSum	ASSP10	ASSP10	92	http://www.ncbi.nlm.nih.gov/sites/entrez?Db=gene&Cmd=ShowDetailView&TermToSearch=650866&ordinalpos=1&itool=EntrezSystem2.PEntrez.Gene.Gene_ResultsPanel.Gene_RVDocSum	LOC650866	LOC650866	406	http://www.ncbi.nlm.nih.gov/sites/entrez?Db=gene&Cmd=ShowDetailView&TermToSearch=153768&ordinalpos=1&itool=EntrezSystem2.PEntrez.Gene.Gene_ResultsPanel.Gene_RVDocSum	MGC21644	MGC21644	437	2.3	0	1.6	0.2	0.1	0.00056	0.054	-0.4	-0.4	-0.2	-0.3	0.42	0.26	0.75
http://www.ensembl.org/Homo_sapiens/Variation/Summary?v=rs26156	rs26156	rs26156	5	0.98	0.02	0	0	0.0001	0.27	0.11	-0.03	T	C	0.37	http://www.ncbi.nlm.nih.gov/sites/entrez?Db=gene&Cmd=ShowDetailView&TermToSearch=455&ordinalpos=1&itool=EntrezSystem2.PEntrez.Gene.Gene_ResultsPanel.Gene_RVDocSum	ASSP10	ASSP10	92	http://www.ncbi.nlm.nih.gov/sites/entrez?Db=gene&Cmd=ShowDetailView&TermToSearch=650866&ordinalpos=1&itool=EntrezSystem2.PEntrez.Gene.Gene_ResultsPanel.Gene_RVDocSum	LOC650866	LOC650866	406	http://www.ncbi.nlm.nih.gov/sites/entrez?Db=gene&Cmd=ShowDetailView&TermToSearch=153768&ordinalpos=1&itool=EntrezSystem2.PEntrez.Gene.Gene_ResultsPanel.Gene_RVDocSum	MGC21644	MGC21644	437	2.3	0	1.6	0.2	0.1	0.00056	0.055	-0.5	-0.4	-0.2	-0.3	0.42	0.26	0.75
http://www.ensembl.org/Homo_sapiens/Variation/Summary?v=rs157858	rs157858	rs157858	5	0.99	0.01	0	0	0.00013	0.27	0.1	-0.03	G	A	0.37	http://www.ncbi.nlm.nih.gov/sites/entrez?Db=gene&Cmd=ShowDetailView&TermToSearch=455&ordinalpos=1&itool=EntrezSystem2.PEntrez.Gene.Gene_ResultsPanel.Gene_RVDocSum	ASSP10	ASSP10	93	http://www.ncbi.nlm.nih.gov/sites/entrez?Db=gene&Cmd=ShowDetailView&TermToSearch=650866&ordinalpos=1&itool=EntrezSystem2.PEntrez.Gene.Gene_ResultsPanel.Gene_RVDocSum	LOC650866	LOC650866	405	http://www.ncbi.nlm.nih.gov/sites/entrez?Db=gene&Cmd=ShowDetailView&TermToSearch=153768&ordinalpos=1&itool=EntrezSystem2.PEntrez.Gene.Gene_ResultsPanel.Gene_RVDocSum	MGC21644	MGC21644	436	2.2	0	1.6	0.2	0.1	0.00073	0.062	-0.4	-0.4	-0.2	-0.3	0.42	0.25	0.74
http://www.ensembl.org/Homo_sapiens/Variation/Summary?v=rs154495	rs154495	rs154495	5	0.98	0.02	0	0	7e-05	0.55	0.11	-0.02	T	C	0.43	http://www.ncbi.nlm.nih.gov/sites/entrez?Db=gene&Cmd=ShowDetailView&TermToSearch=455&ordinalpos=1&itool=EntrezSystem2.PEntrez.Gene.Gene_ResultsPanel.Gene_RVDocSum	ASSP10	ASSP10	108	http://www.ncbi.nlm.nih.gov/sites/entrez?Db=gene&Cmd=ShowDetailView&TermToSearch=650866&ordinalpos=1&itool=EntrezSystem2.PEntrez.Gene.Gene_ResultsPanel.Gene_RVDocSum	LOC650866	LOC650866	390	http://www.ncbi.nlm.nih.gov/sites/entrez?Db=gene&Cmd=ShowDetailView&TermToSearch=153768&ordinalpos=1&itool=EntrezSystem2.PEntrez.Gene.Gene_ResultsPanel.Gene_RVDocSum	MGC21644	MGC21644	421	2.4	0	1.7	0.3	0.076	0.00049	0.046	-0.6	-0.5	-0.2	-0.3	0.8	0.3	0.66
http://www.ensembl.org/Homo_sapiens/Variation/Summary?v=rs2442760	rs2442760	rs2442760	5	0.98	0.02	0	0	7.5e-05	0.41	0.1	-0.02	T	C	0.38	http://www.ncbi.nlm.nih.gov/sites/entrez?Db=gene&Cmd=ShowDetailView&TermToSearch=455&ordinalpos=1&itool=EntrezSystem2.PEntrez.Gene.Gene_ResultsPanel.Gene_RVDocSum	ASSP10	ASSP10	117	http://www.ncbi.nlm.nih.gov/sites/entrez?Db=gene&Cmd=ShowDetailView&TermToSearch=650866&ordinalpos=1&itool=EntrezSystem2.PEntrez.Gene.Gene_ResultsPanel.Gene_RVDocSum	LOC650866	LOC650866	381	http://www.ncbi.nlm.nih.gov/sites/entrez?Db=gene&Cmd=ShowDetailView&TermToSearch=153768&ordinalpos=1&itool=EntrezSystem2.PEntrez.Gene.Gene_ResultsPanel.Gene_RVDocSum	MGC21644	MGC21644	412	2.4	-0.1	1.9	0.3	0.098	0.00031	0.045	-0.6	-0.5	-0.3	-0.2	0.44	0.36	0.49
http://www.ensembl.org/Homo_sapiens/Variation/Summary?v=rs26158	rs26158	rs26158	5	0.98	0.02	0	0	6.6e-05	0.44	0.1	-0.02	C	T	0.37	http://www.ncbi.nlm.nih.gov/sites/entrez?Db=gene&Cmd=ShowDetailView&TermToSearch=455&ordinalpos=1&itool=EntrezSystem2.PEntrez.Gene.Gene_ResultsPanel.Gene_RVDocSum	ASSP10	ASSP10	130	http://www.ncbi.nlm.nih.gov/sites/entrez?Db=gene&Cmd=ShowDetailView&TermToSearch=650866&ordinalpos=1&itool=EntrezSystem2.PEntrez.Gene.Gene_ResultsPanel.Gene_RVDocSum	LOC650866	LOC650866	368	http://www.ncbi.nlm.nih.gov/sites/entrez?Db=gene&Cmd=ShowDetailView&TermToSearch=153768&ordinalpos=1&itool=EntrezSystem2.PEntrez.Gene.Gene_ResultsPanel.Gene_RVDocSum	MGC21644	MGC21644	399	2.4	-0.1	1.9	0.3	0.095	0.0003	0.045	-0.6	-0.5	-0.3	-0.2	0.45	0.42	0.51
http://www.ensembl.org/Homo_sapiens/Variation/Summary?v=rs32197	rs32197	rs32197	5	0.98	0.02	0	0	6.6e-05	0.43	0.1	-0.02	A	G	0.35	http://www.ncbi.nlm.nih.gov/sites/entrez?Db=gene&Cmd=ShowDetailView&TermToSearch=455&ordinalpos=1&itool=EntrezSystem2.PEntrez.Gene.Gene_ResultsPanel.Gene_RVDocSum	ASSP10	ASSP10	133	http://www.ncbi.nlm.nih.gov/sites/entrez?Db=gene&Cmd=ShowDetailView&TermToSearch=650866&ordinalpos=1&itool=EntrezSystem2.PEntrez.Gene.Gene_ResultsPanel.Gene_RVDocSum	LOC650866	LOC650866	365	http://www.ncbi.nlm.nih.gov/sites/entrez?Db=gene&Cmd=ShowDetailView&TermToSearch=153768&ordinalpos=1&itool=EntrezSystem2.PEntrez.Gene.Gene_ResultsPanel.Gene_RVDocSum	MGC21644	MGC21644	396	2.4	0	1.9	0.3	0.096	0.0003	0.049	-0.6	-0.5	-0.3	-0.3	0.46	0.4	0.55
http://www.ensembl.org/Homo_sapiens/Variation/Summary?v=rs1450326	rs1450326	rs1450326	5	0.97	0.03	0	0	5e-05	0.39	0.1	-0.02	G	A	0.37	http://www.ncbi.nlm.nih.gov/sites/entrez?Db=gene&Cmd=ShowDetailView&TermToSearch=455&ordinalpos=1&itool=EntrezSystem2.PEntrez.Gene.Gene_ResultsPanel.Gene_RVDocSum	ASSP10	ASSP10	135	http://www.ncbi.nlm.nih.gov/sites/entrez?Db=gene&Cmd=ShowDetailView&TermToSearch=650866&ordinalpos=1&itool=EntrezSystem2.PEntrez.Gene.Gene_ResultsPanel.Gene_RVDocSum	LOC650866	LOC650866	363	http://www.ncbi.nlm.nih.gov/sites/entrez?Db=gene&Cmd=ShowDetailView&TermToSearch=153768&ordinalpos=1&itool=EntrezSystem2.PEntrez.Gene.Gene_ResultsPanel.Gene_RVDocSum	MGC21644	MGC21644	393	2.5	0	1.9	0.3	0.079	0.00026	0.045	-0.6	-0.4	-0.3	-0.3	0.37	0.45	0.54
http://www.ensembl.org/Homo_sapiens/Variation/Summary?v=rs2442988	rs2442988	rs2442988	5	0.97	0.03	0	0	5.4e-05	0.44	0.1	-0.02	C	T	0.37	http://www.ncbi.nlm.nih.gov/sites/entrez?Db=gene&Cmd=ShowDetailView&TermToSearch=455&ordinalpos=1&itool=EntrezSystem2.PEntrez.Gene.Gene_ResultsPanel.Gene_RVDocSum	ASSP10	ASSP10	138	http://www.ncbi.nlm.nih.gov/sites/entrez?Db=gene&Cmd=ShowDetailView&TermToSearch=650866&ordinalpos=1&itool=EntrezSystem2.PEntrez.Gene.Gene_ResultsPanel.Gene_RVDocSum	LOC650866	LOC650866	360	http://www.ncbi.nlm.nih.gov/sites/entrez?Db=gene&Cmd=ShowDetailView&TermToSearch=153768&ordinalpos=1&itool=EntrezSystem2.PEntrez.Gene.Gene_ResultsPanel.Gene_RVDocSum	MGC21644	MGC21644	391	2.5	0	1.9	0.3	0.085	0.00027	0.045	-0.6	-0.5	-0.3	-0.3	0.43	0.46	0.55
http://www.ensembl.org/Homo_sapiens/Variation/Summary?v=rs2839745	rs2839745	rs2839745	5	0.98	0.02	0	0	7.2e-05	0.44	0.1	-0.02	A	C	0.36	http://www.ncbi.nlm.nih.gov/sites/entrez?Db=gene&Cmd=ShowDetailView&TermToSearch=455&ordinalpos=1&itool=EntrezSystem2.PEntrez.Gene.Gene_ResultsPanel.Gene_RVDocSum	ASSP10	ASSP10	150	http://www.ncbi.nlm.nih.gov/sites/entrez?Db=gene&Cmd=ShowDetailView&TermToSearch=650866&ordinalpos=1&itool=EntrezSystem2.PEntrez.Gene.Gene_ResultsPanel.Gene_RVDocSum	LOC650866	LOC650866	348	http://www.ncbi.nlm.nih.gov/sites/entrez?Db=gene&Cmd=ShowDetailView&TermToSearch=153768&ordinalpos=1&itool=EntrezSystem2.PEntrez.Gene.Gene_ResultsPanel.Gene_RVDocSum	MGC21644	MGC21644	379	2.4	-0.1	1.8	0.3	0.11	0.00037	0.039	-0.5	-0.5	-0.2	-0.2	0.47	0.39	0.52
http://www.ensembl.org/Homo_sapiens/Variation/Summary?v=rs7444042	rs7444042	rs7444042	5	0.98	0.02	0	0	7.4e-05	0.34	0.1	-0.02	A	T	0.39	http://www.ncbi.nlm.nih.gov/sites/entrez?Db=gene&Cmd=ShowDetailView&TermToSearch=455&ordinalpos=1&itool=EntrezSystem2.PEntrez.Gene.Gene_ResultsPanel.Gene_RVDocSum	ASSP10	ASSP10	154	http://www.ncbi.nlm.nih.gov/sites/entrez?Db=gene&Cmd=ShowDetailView&TermToSearch=650866&ordinalpos=1&itool=EntrezSystem2.PEntrez.Gene.Gene_ResultsPanel.Gene_RVDocSum	LOC650866	LOC650866	344	http://www.ncbi.nlm.nih.gov/sites/entrez?Db=gene&Cmd=ShowDetailView&TermToSearch=153768&ordinalpos=1&itool=EntrezSystem2.PEntrez.Gene.Gene_ResultsPanel.Gene_RVDocSum	MGC21644	MGC21644	375	2.4	-0.1	1.6	0.3	0.091	0.0007	0.039	-0.5	-0.5	-0.1	-0.3	0.43	0.27	0.54
http://www.ensembl.org/Homo_sapiens/Variation/Summary?v=rs282461	rs282461	rs282461	5	0.98	0.02	0	0	6.9e-05	0.33	0.1	-0.02	C	G	0.39	http://www.ncbi.nlm.nih.gov/sites/entrez?Db=gene&Cmd=ShowDetailView&TermToSearch=455&ordinalpos=1&itool=EntrezSystem2.PEntrez.Gene.Gene_ResultsPanel.Gene_RVDocSum	ASSP10	ASSP10	155	http://www.ncbi.nlm.nih.gov/sites/entrez?Db=gene&Cmd=ShowDetailView&TermToSearch=650866&ordinalpos=1&itool=EntrezSystem2.PEntrez.Gene.Gene_ResultsPanel.Gene_RVDocSum	LOC650866	LOC650866	343	http://www.ncbi.nlm.nih.gov/sites/entrez?Db=gene&Cmd=ShowDetailView&TermToSearch=153768&ordinalpos=1&itool=EntrezSystem2.PEntrez.Gene.Gene_ResultsPanel.Gene_RVDocSum	MGC21644	MGC21644	373	2.4	0	1.6	0.3	0.084	0.00071	0.045	-0.4	-0.5	-0.1	-0.3	0.43	0.27	0.57
http://www.ensembl.org/Homo_sapiens/Variation/Summary?v=rs32193	rs32193	rs32193	5	0.98	0.02	0	0	0.0001	0.38	0.09	-0.02	G	A	0.4	http://www.ncbi.nlm.nih.gov/sites/entrez?Db=gene&Cmd=ShowDetailView&TermToSearch=455&ordinalpos=1&itool=EntrezSystem2.PEntrez.Gene.Gene_ResultsPanel.Gene_RVDocSum	ASSP10	ASSP10	159	http://www.ncbi.nlm.nih.gov/sites/entrez?Db=gene&Cmd=ShowDetailView&TermToSearch=650866&ordinalpos=1&itool=EntrezSystem2.PEntrez.Gene.Gene_ResultsPanel.Gene_RVDocSum	LOC650866	LOC650866	339	http://www.ncbi.nlm.nih.gov/sites/entrez?Db=gene&Cmd=ShowDetailView&TermToSearch=153768&ordinalpos=1&itool=EntrezSystem2.PEntrez.Gene.Gene_ResultsPanel.Gene_RVDocSum	MGC21644	MGC21644	370	2.2	0	1.4	0.2	0.079	0.0012	0.061	-0.5	-0.5	-0.1	-0.3	0.54	0.21	0.46
http://www.ensembl.org/Homo_sapiens/Variation/Summary?v=rs32192	rs32192	rs32192	5	0.98	0.02	0	0	0.00011	0.38	0.09	-0.02	C	T	0.4	http://www.ncbi.nlm.nih.gov/sites/entrez?Db=gene&Cmd=ShowDetailView&TermToSearch=455&ordinalpos=1&itool=EntrezSystem2.PEntrez.Gene.Gene_ResultsPanel.Gene_RVDocSum	ASSP10	ASSP10	159	http://www.ncbi.nlm.nih.gov/sites/entrez?Db=gene&Cmd=ShowDetailView&TermToSearch=650866&ordinalpos=1&itool=EntrezSystem2.PEntrez.Gene.Gene_ResultsPanel.Gene_RVDocSum	LOC650866	LOC650866	339	http://www.ncbi.nlm.nih.gov/sites/entrez?Db=gene&Cmd=ShowDetailView&TermToSearch=153768&ordinalpos=1&itool=EntrezSystem2.PEntrez.Gene.Gene_ResultsPanel.Gene_RVDocSum	MGC21644	MGC21644	370	2.2	0	1.4	0.2	0.079	0.0012	0.061	-0.5	-0.5	-0.1	-0.3	0.54	0.21	0.46
http://www.ensembl.org/Homo_sapiens/Variation/Summary?v=rs32191	rs32191	rs32191	5	0.99	0.01	0	0	0.00014	0.35	0.09	-0.02	C	T	0.4	http://www.ncbi.nlm.nih.gov/sites/entrez?Db=gene&Cmd=ShowDetailView&TermToSearch=455&ordinalpos=1&itool=EntrezSystem2.PEntrez.Gene.Gene_ResultsPanel.Gene_RVDocSum	ASSP10	ASSP10	159	http://www.ncbi.nlm.nih.gov/sites/entrez?Db=gene&Cmd=ShowDetailView&TermToSearch=650866&ordinalpos=1&itool=EntrezSystem2.PEntrez.Gene.Gene_ResultsPanel.Gene_RVDocSum	LOC650866	LOC650866	339	http://www.ncbi.nlm.nih.gov/sites/entrez?Db=gene&Cmd=ShowDetailView&TermToSearch=153768&ordinalpos=1&itool=EntrezSystem2.PEntrez.Gene.Gene_ResultsPanel.Gene_RVDocSum	MGC21644	MGC21644	370	2.1	0	1.3	0.1	0.079	0.0016	0.067	-0.5	-0.5	0	-0.3	0.53	0.2	0.52
http://www.ensembl.org/Homo_sapiens/Variation/Summary?v=rs32190	rs32190	rs32190	5	0.97	0.03	0	0	5.5e-05	0.37	0.1	-0.02	T	C	0.39	http://www.ncbi.nlm.nih.gov/sites/entrez?Db=gene&Cmd=ShowDetailView&TermToSearch=455&ordinalpos=1&itool=EntrezSystem2.PEntrez.Gene.Gene_ResultsPanel.Gene_RVDocSum	ASSP10	ASSP10	160	http://www.ncbi.nlm.nih.gov/sites/entrez?Db=gene&Cmd=ShowDetailView&TermToSearch=650866&ordinalpos=1&itool=EntrezSystem2.PEntrez.Gene.Gene_ResultsPanel.Gene_RVDocSum	LOC650866	LOC650866	338	http://www.ncbi.nlm.nih.gov/sites/entrez?Db=gene&Cmd=ShowDetailView&TermToSearch=153768&ordinalpos=1&itool=EntrezSystem2.PEntrez.Gene.Gene_ResultsPanel.Gene_RVDocSum	MGC21644	MGC21644	369	2.5	0	1.5	0.3	0.072	0.00083	0.039	-0.4	-0.5	-0.1	-0.3	0.41	0.36	0.59
http://www.ensembl.org/Homo_sapiens/Variation/Summary?v=rs282455	rs282455	rs282455	5	0.98	0.02	0	0	6.4e-05	0.36	0.1	-0.02	A	C	0.37	http://www.ncbi.nlm.nih.gov/sites/entrez?Db=gene&Cmd=ShowDetailView&TermToSearch=455&ordinalpos=1&itool=EntrezSystem2.PEntrez.Gene.Gene_ResultsPanel.Gene_RVDocSum	ASSP10	ASSP10	164	http://www.ncbi.nlm.nih.gov/sites/entrez?Db=gene&Cmd=ShowDetailView&TermToSearch=650866&ordinalpos=1&itool=EntrezSystem2.PEntrez.Gene.Gene_ResultsPanel.Gene_RVDocSum	LOC650866	LOC650866	334	http://www.ncbi.nlm.nih.gov/sites/entrez?Db=gene&Cmd=ShowDetailView&TermToSearch=153768&ordinalpos=1&itool=EntrezSystem2.PEntrez.Gene.Gene_ResultsPanel.Gene_RVDocSum	MGC21644	MGC21644	364	2.4	-0.1	1.6	0.3	0.094	0.00055	0.043	-0.4	-0.4	-0.1	-0.3	0.38	0.4	0.61
http://www.ensembl.org/Homo_sapiens/Variation/Summary?v=rs1422665	rs1422665	rs1422665	5	0.96	0.04	0	0	0.00027	0.48	-0.1	0.02	T	C	0.27	http://www.ncbi.nlm.nih.gov/sites/entrez?Db=gene&Cmd=ShowDetailView&TermToSearch=55568&ordinalpos=1&itool=EntrezSystem2.PEntrez.Gene.Gene_ResultsPanel.Gene_RVDocSum	GALNT10	GALNT10	0	http://www.ncbi.nlm.nih.gov/sites/entrez?Db=gene&Cmd=ShowDetailView&TermToSearch=79685&ordinalpos=1&itool=EntrezSystem2.PEntrez.Gene.Gene_ResultsPanel.Gene_RVDocSum	SAP30L	SAP30L	69	http://www.ncbi.nlm.nih.gov/sites/entrez?Db=gene&Cmd=ShowDetailView&TermToSearch=9421&ordinalpos=1&itool=EntrezSystem2.PEntrez.Gene.Gene_ResultsPanel.Gene_RVDocSum	HAND1	HAND1	97	2.7	0.3	1.4	0.1	0.066	0.0038	0.095	-0.6	-0.5	-0.3	-0.1	0.57	0.26	0.23
http://www.ensembl.org/Homo_sapiens/Variation/Summary?v=rs7728507	rs7728507	rs7728507	5	0.97	0.03	0	0	0.00032	0.46	-0.1	0.02	T	C	0.26	http://www.ncbi.nlm.nih.gov/sites/entrez?Db=gene&Cmd=ShowDetailView&TermToSearch=55568&ordinalpos=1&itool=EntrezSystem2.PEntrez.Gene.Gene_ResultsPanel.Gene_RVDocSum	GALNT10	GALNT10	0	http://www.ncbi.nlm.nih.gov/sites/entrez?Db=gene&Cmd=ShowDetailView&TermToSearch=79685&ordinalpos=1&itool=EntrezSystem2.PEntrez.Gene.Gene_ResultsPanel.Gene_RVDocSum	SAP30L	SAP30L	67	http://www.ncbi.nlm.nih.gov/sites/entrez?Db=gene&Cmd=ShowDetailView&TermToSearch=9421&ordinalpos=1&itool=EntrezSystem2.PEntrez.Gene.Gene_ResultsPanel.Gene_RVDocSum	HAND1	HAND1	96	2.6	0.3	1.3	0.1	0.073	0.004	0.099	-0.6	-0.5	-0.2	-0.1	0.58	0.26	0.23
http://www.ensembl.org/Homo_sapiens/Variation/Summary?v=rs17116042	rs17116042	rs17116042	5	0.96	0.04	0	0	0.00029	0.48	-0.09	0.02	C	T	0.27	http://www.ncbi.nlm.nih.gov/sites/entrez?Db=gene&Cmd=ShowDetailView&TermToSearch=55568&ordinalpos=1&itool=EntrezSystem2.PEntrez.Gene.Gene_ResultsPanel.Gene_RVDocSum	GALNT10	GALNT10	0	http://www.ncbi.nlm.nih.gov/sites/entrez?Db=gene&Cmd=ShowDetailView&TermToSearch=79685&ordinalpos=1&itool=EntrezSystem2.PEntrez.Gene.Gene_ResultsPanel.Gene_RVDocSum	SAP30L	SAP30L	65	http://www.ncbi.nlm.nih.gov/sites/entrez?Db=gene&Cmd=ShowDetailView&TermToSearch=9421&ordinalpos=1&itool=EntrezSystem2.PEntrez.Gene.Gene_ResultsPanel.Gene_RVDocSum	HAND1	HAND1	94	2.7	0.4	1.4	0.1	0.067	0.0038	0.098	-0.6	-0.5	-0.3	-0.1	0.57	0.26	0.23
http://www.ensembl.org/Homo_sapiens/Variation/Summary?v=rs750063	rs750063	rs750063	5	0.99	0.01	0	0	0.0002	0.044	0.1	-0.05	A	G	0.28	http://www.ncbi.nlm.nih.gov/sites/entrez?Db=gene&Cmd=ShowDetailView&TermToSearch=55568&ordinalpos=1&itool=EntrezSystem2.PEntrez.Gene.Gene_ResultsPanel.Gene_RVDocSum	GALNT10	GALNT10	0	http://www.ncbi.nlm.nih.gov/sites/entrez?Db=gene&Cmd=ShowDetailView&TermToSearch=79685&ordinalpos=1&itool=EntrezSystem2.PEntrez.Gene.Gene_ResultsPanel.Gene_RVDocSum	SAP30L	SAP30L	65	http://www.ncbi.nlm.nih.gov/sites/entrez?Db=gene&Cmd=ShowDetailView&TermToSearch=9421&ordinalpos=1&itool=EntrezSystem2.PEntrez.Gene.Gene_ResultsPanel.Gene_RVDocSum	HAND1	HAND1	94	2	-0.3	1.8	0.2	0.22	0.00037	0.05	0.1	-0.1	-0.4	-0.1	0.1	0.57	0.18
http://www.ensembl.org/Homo_sapiens/Variation/Summary?v=rs6870010	rs6870010	rs6870010	5	0.97	0.03	0	0	0.00035	0.4	-0.1	0.02	C	T	0.25	http://www.ncbi.nlm.nih.gov/sites/entrez?Db=gene&Cmd=ShowDetailView&TermToSearch=55568&ordinalpos=1&itool=EntrezSystem2.PEntrez.Gene.Gene_ResultsPanel.Gene_RVDocSum	GALNT10	GALNT10	0	http://www.ncbi.nlm.nih.gov/sites/entrez?Db=gene&Cmd=ShowDetailView&TermToSearch=79685&ordinalpos=1&itool=EntrezSystem2.PEntrez.Gene.Gene_ResultsPanel.Gene_RVDocSum	SAP30L	SAP30L	60	http://www.ncbi.nlm.nih.gov/sites/entrez?Db=gene&Cmd=ShowDetailView&TermToSearch=9421&ordinalpos=1&itool=EntrezSystem2.PEntrez.Gene.Gene_ResultsPanel.Gene_RVDocSum	HAND1	HAND1	89	2.5	0.3	1.3	0	0.078	0.0042	0.12	-0.5	-0.5	-0.2	-0.1	0.62	0.25	0.24
http://www.ensembl.org/Homo_sapiens/Variation/Summary?v=rs6898100	rs6898100	rs6898100	5	0.99	0.01	0	0	0.00016	0.45	0.1	0.02	C	T	0.31	http://www.ncbi.nlm.nih.gov/sites/entrez?Db=gene&Cmd=ShowDetailView&TermToSearch=6444&ordinalpos=1&itool=EntrezSystem2.PEntrez.Gene.Gene_ResultsPanel.Gene_RVDocSum	SGCD	SGCD	11	http://www.ncbi.nlm.nih.gov/sites/entrez?Db=gene&Cmd=ShowDetailView&TermToSearch=153743&ordinalpos=1&itool=EntrezSystem2.PEntrez.Gene.Gene_ResultsPanel.Gene_RVDocSum	PPP1R2P3	PPP1R2P3	535	http://www.ncbi.nlm.nih.gov/sites/entrez?Db=gene&Cmd=ShowDetailView&TermToSearch=91937&ordinalpos=1&itool=EntrezSystem2.PEntrez.Gene.Gene_ResultsPanel.Gene_RVDocSum	TIMD4	TIMD4	604	2.1	0.3	0.2	0.9	0.035	0.043	0.0044	-0.6	-0.5	-0.3	-0.3	0.57	0.76	0.64
http://www.ensembl.org/Homo_sapiens/Variation/Summary?v=rs10057826	rs10057826	rs10057826	5	0.98	0.02	0	0	9.3e-05	0.31	0.11	0.03	C	T	0.29	http://www.ncbi.nlm.nih.gov/sites/entrez?Db=gene&Cmd=ShowDetailView&TermToSearch=6444&ordinalpos=1&itool=EntrezSystem2.PEntrez.Gene.Gene_ResultsPanel.Gene_RVDocSum	SGCD	SGCD	2	http://www.ncbi.nlm.nih.gov/sites/entrez?Db=gene&Cmd=ShowDetailView&TermToSearch=153743&ordinalpos=1&itool=EntrezSystem2.PEntrez.Gene.Gene_ResultsPanel.Gene_RVDocSum	PPP1R2P3	PPP1R2P3	526	http://www.ncbi.nlm.nih.gov/sites/entrez?Db=gene&Cmd=ShowDetailView&TermToSearch=91937&ordinalpos=1&itool=EntrezSystem2.PEntrez.Gene.Gene_ResultsPanel.Gene_RVDocSum	TIMD4	TIMD4	594	2.3	0.3	0.4	1.1	0.035	0.033	0.0023	-0.5	-0.5	-0.3	-0.1	0.63	0.7	0.25
http://www.ensembl.org/Homo_sapiens/Variation/Summary?v=rs6884105	rs6884105	rs6884105	5	0.99	0.01	0	0	0.00014	0.46	0.1	-0.02	A	G	0.35	http://www.ncbi.nlm.nih.gov/sites/entrez?Db=gene&Cmd=ShowDetailView&TermToSearch=147&ordinalpos=1&itool=EntrezSystem2.PEntrez.Gene.Gene_ResultsPanel.Gene_RVDocSum	ADRA1B	ADRA1B	0	http://www.ncbi.nlm.nih.gov/sites/entrez?Db=gene&Cmd=ShowDetailView&TermToSearch=7265&ordinalpos=1&itool=EntrezSystem2.PEntrez.Gene.Gene_ResultsPanel.Gene_RVDocSum	TTC1	TTC1	88	http://www.ncbi.nlm.nih.gov/sites/entrez?Db=gene&Cmd=ShowDetailView&TermToSearch=114825&ordinalpos=1&itool=EntrezSystem2.PEntrez.Gene.Gene_ResultsPanel.Gene_RVDocSum	MST101	MST101	170	2.1	1.3	-0.4	1.1	0.0014	0.56	0.0029	-0.6	-0.6	-0.1	-0.3	0.75	0.15	0.6
http://www.ensembl.org/Homo_sapiens/Variation/Summary?v=rs9393994	rs9393994	rs9393994	6	0.99	0.01	0	0	0.00018	0.052	0.2	-0.11	T	G	0.1	http://www.ncbi.nlm.nih.gov/sites/entrez?Db=gene&Cmd=ShowDetailView&TermToSearch=4739&ordinalpos=1&itool=EntrezSystem2.PEntrez.Gene.Gene_ResultsPanel.Gene_RVDocSum	NEDD9	NEDD9	11	http://www.ncbi.nlm.nih.gov/sites/entrez?Db=gene&Cmd=ShowDetailView&TermToSearch=405754&ordinalpos=1&itool=EntrezSystem2.PEntrez.Gene.Gene_ResultsPanel.Gene_RVDocSum	HERV-FRD	HERV-FRD	132	http://www.ncbi.nlm.nih.gov/sites/entrez?Db=gene&Cmd=ShowDetailView&TermToSearch=54898&ordinalpos=1&itool=EntrezSystem2.PEntrez.Gene.Gene_ResultsPanel.Gene_RVDocSum	ELOVL2	ELOVL2	199	2.1	-0.2	1.1	0.9	0.88	0.0023	0.0041	0.2	-0.1	0.5	-0.2	0.4	0.02	0.77
http://www.ensembl.org/Homo_sapiens/Variation/Summary?v=rs6456381	rs6456381	rs6456381	6	0.98	0.02	0	0	7.6e-05	0.89	0.11	0	T	A	0.28	http://www.ncbi.nlm.nih.gov/sites/entrez?Db=gene&Cmd=ShowDetailView&TermToSearch=54901&ordinalpos=1&itool=EntrezSystem2.PEntrez.Gene.Gene_ResultsPanel.Gene_RVDocSum	CDKAL1	CDKAL1	0	http://www.ncbi.nlm.nih.gov/sites/entrez?Db=gene&Cmd=ShowDetailView&TermToSearch=1871&ordinalpos=1&itool=EntrezSystem2.PEntrez.Gene.Gene_ResultsPanel.Gene_RVDocSum	E2F3	E2F3	407	http://www.ncbi.nlm.nih.gov/sites/entrez?Db=gene&Cmd=ShowDetailView&TermToSearch=154141&ordinalpos=1&itool=EntrezSystem2.PEntrez.Gene.Gene_ResultsPanel.Gene_RVDocSum	MBOAT1	MBOAT1	689	2.4	0.7	1.7	-0.3	0.0095	0.00048	0.89	-0.6	-0.4	-0.5	-0.3	0.57	0.8	0.84
http://www.ensembl.org/Homo_sapiens/Variation/Summary?v=rs6456382	rs6456382	rs6456382	6	0.98	0.02	0	0	8.8e-05	0.93	0.11	0	G	A	0.29	http://www.ncbi.nlm.nih.gov/sites/entrez?Db=gene&Cmd=ShowDetailView&TermToSearch=54901&ordinalpos=1&itool=EntrezSystem2.PEntrez.Gene.Gene_ResultsPanel.Gene_RVDocSum	CDKAL1	CDKAL1	0	http://www.ncbi.nlm.nih.gov/sites/entrez?Db=gene&Cmd=ShowDetailView&TermToSearch=1871&ordinalpos=1&itool=EntrezSystem2.PEntrez.Gene.Gene_ResultsPanel.Gene_RVDocSum	E2F3	E2F3	407	http://www.ncbi.nlm.nih.gov/sites/entrez?Db=gene&Cmd=ShowDetailView&TermToSearch=154141&ordinalpos=1&itool=EntrezSystem2.PEntrez.Gene.Gene_ResultsPanel.Gene_RVDocSum	MBOAT1	MBOAT1	689	2.4	0.6	1.8	-0.3	0.013	0.00036	0.91	-0.6	-0.4	-0.5	-0.3	0.59	0.82	0.79
http://www.ensembl.org/Homo_sapiens/Variation/Summary?v=rs11970030	rs11970030	rs11970030	6	0.99	0.01	0	0	0.00014	0.72	0.26	0.02	C	G	0.11	http://www.ncbi.nlm.nih.gov/sites/entrez?Db=gene&Cmd=ShowDetailView&TermToSearch=54901&ordinalpos=1&itool=EntrezSystem2.PEntrez.Gene.Gene_ResultsPanel.Gene_RVDocSum	CDKAL1	CDKAL1	0	http://www.ncbi.nlm.nih.gov/sites/entrez?Db=gene&Cmd=ShowDetailView&TermToSearch=1871&ordinalpos=1&itool=EntrezSystem2.PEntrez.Gene.Gene_ResultsPanel.Gene_RVDocSum	E2F3	E2F3	436	http://www.ncbi.nlm.nih.gov/sites/entrez?Db=gene&Cmd=ShowDetailView&TermToSearch=6659&ordinalpos=1&itool=EntrezSystem2.PEntrez.Gene.Gene_ResultsPanel.Gene_RVDocSum	SOX4	SOX4	664	2.1	0.6	1	-0.1	0.013	0.0021	0.49	-0.3	-0.2	-0.2	0	0.95	0.87	0.29
http://www.ensembl.org/Homo_sapiens/Variation/Summary?v=rs6936035	rs6936035	rs6936035	6	0.96	0.04	0	0	3.9e-05	0.89	0.13	0	G	A	0.21	http://www.ncbi.nlm.nih.gov/sites/entrez?Db=gene&Cmd=ShowDetailView&TermToSearch=729816&ordinalpos=1&itool=EntrezSystem2.PEntrez.Gene.Gene_ResultsPanel.Gene_RVDocSum	LOC729816	LOC729816	6	http://www.ncbi.nlm.nih.gov/sites/entrez?Db=gene&Cmd=ShowDetailView&TermToSearch=3106&ordinalpos=1&itool=EntrezSystem2.PEntrez.Gene.Gene_ResultsPanel.Gene_RVDocSum	HLA-B	HLA-B	16	http://www.ncbi.nlm.nih.gov/sites/entrez?Db=gene&Cmd=ShowDetailView&TermToSearch=4276&ordinalpos=1&itool=EntrezSystem2.PEntrez.Gene.Gene_ResultsPanel.Gene_RVDocSum	MICA	MICA	30	2.6	2.6	-0.1	-0.2	4e-05	0.23	0.53	-0.6	-0.4	-0.2	0	0.56	0.7	0.13
http://www.ensembl.org/Homo_sapiens/Variation/Summary?v=rs4959068	rs4959068	rs4959068	6	0.99	0.01	0	0	6.8e-05	0.5	0.36	-0.06	A	T	0.07	http://www.ncbi.nlm.nih.gov/sites/entrez?Db=gene&Cmd=ShowDetailView&TermToSearch=729816&ordinalpos=1&itool=EntrezSystem2.PEntrez.Gene.Gene_ResultsPanel.Gene_RVDocSum	LOC729816	LOC729816	9	http://www.ncbi.nlm.nih.gov/sites/entrez?Db=gene&Cmd=ShowDetailView&TermToSearch=3106&ordinalpos=1&itool=EntrezSystem2.PEntrez.Gene.Gene_ResultsPanel.Gene_RVDocSum	HLA-B	HLA-B	19	http://www.ncbi.nlm.nih.gov/sites/entrez?Db=gene&Cmd=ShowDetailView&TermToSearch=4276&ordinalpos=1&itool=EntrezSystem2.PEntrez.Gene.Gene_ResultsPanel.Gene_RVDocSum	MICA	MICA	28	2.2	2.1	0	0	6.5e-05	0.28	0.54	-0.2	-0.2	-0.1	0	0.82	0.88	0.2
http://www.ensembl.org/Homo_sapiens/Variation/Summary?v=rs6911024	rs6911024	rs6911024	6	0.96	0.04	0	0	2.5e-05	0.25	0.27	-0.07	C	T	0.1	http://www.ncbi.nlm.nih.gov/sites/entrez?Db=gene&Cmd=ShowDetailView&TermToSearch=4276&ordinalpos=1&itool=EntrezSystem2.PEntrez.Gene.Gene_ResultsPanel.Gene_RVDocSum	MICA	MICA	3	http://www.ncbi.nlm.nih.gov/sites/entrez?Db=gene&Cmd=ShowDetailView&TermToSearch=729816&ordinalpos=1&itool=EntrezSystem2.PEntrez.Gene.Gene_ResultsPanel.Gene_RVDocSum	LOC729816	LOC729816	34	http://www.ncbi.nlm.nih.gov/sites/entrez?Db=gene&Cmd=ShowDetailView&TermToSearch=3106&ordinalpos=1&itool=EntrezSystem2.PEntrez.Gene.Gene_ResultsPanel.Gene_RVDocSum	HLA-B	HLA-B	44	2.7	2.2	0	0	8.1e-05	0.18	0.36	-0.1	-0.3	-0.1	0.4	0.75	0.71	0.014
rs-link	rsnum	SNP	chr	HO	HS	HD	HS+D	P-value-S	P-value-D	Effect-S	Effect-D	Minor Allele	Major Allele	MAF	GENE1-link	GENE1	GENE1	dist1 (Kb)	GENE2-link	GENE2	GENE2	dist2 (Kb)	GENE3-link	GENE3	GENE3	dist3 (Kb)	log10BF-S	log10BF-S-TNT	log10BF-S-PRINCE	log10BF-S-CAP	P-value-S-TNT	P-value-S-PRINCE	P-value-S-CAP	log10BF-D	log10BF-D-TNT	log10BF-D-PRINCE	log10BF-D-CAP	P-value-D-TNT	P-value-D-PRINCE	P-value-D-CAP
http://www.ensembl.org/Homo_sapiens/Variation/Summary?v=rs9366886	rs9366886	rs9366886	6	0.98	0.02	0	0	0.00016	0.91	-0.11	0	A	G	0.36	http://www.ncbi.nlm.nih.gov/sites/entrez?Db=gene&Cmd=ShowDetailView&TermToSearch=7005&ordinalpos=1&itool=EntrezSystem2.PEntrez.Gene.Gene_ResultsPanel.Gene_RVDocSum	TEAD3	TEAD3	0	http://www.ncbi.nlm.nih.gov/sites/entrez?Db=gene&Cmd=ShowDetailView&TermToSearch=7287&ordinalpos=1&itool=EntrezSystem2.PEntrez.Gene.Gene_ResultsPanel.Gene_RVDocSum	TULP1	TULP1	8	http://www.ncbi.nlm.nih.gov/sites/entrez?Db=gene&Cmd=ShowDetailView&TermToSearch=4736&ordinalpos=1&itool=EntrezSystem2.PEntrez.Gene.Gene_ResultsPanel.Gene_RVDocSum	RPL10A	RPL10A	19	2.3	0.6	1.4	-0.1	0.039	0.0012	0.26	-0.6	-0.5	-0.3	-0.1	0.74	0.87	0.26
http://www.ensembl.org/Homo_sapiens/Variation/Summary?v=rs7757174	rs7757174	rs7757174	6	0.98	0.02	0	0	0.00013	0.92	-0.09	0	G	A	0.48	http://www.ncbi.nlm.nih.gov/sites/entrez?Db=gene&Cmd=ShowDetailView&TermToSearch=7005&ordinalpos=1&itool=EntrezSystem2.PEntrez.Gene.Gene_ResultsPanel.Gene_RVDocSum	TEAD3	TEAD3	0	http://www.ncbi.nlm.nih.gov/sites/entrez?Db=gene&Cmd=ShowDetailView&TermToSearch=7287&ordinalpos=1&itool=EntrezSystem2.PEntrez.Gene.Gene_ResultsPanel.Gene_RVDocSum	TULP1	TULP1	5	http://www.ncbi.nlm.nih.gov/sites/entrez?Db=gene&Cmd=ShowDetailView&TermToSearch=4736&ordinalpos=1&itool=EntrezSystem2.PEntrez.Gene.Gene_ResultsPanel.Gene_RVDocSum	RPL10A	RPL10A	22	2.2	0.3	1.7	-0.1	0.062	0.0005	0.18	-0.7	-0.6	-0.3	-0.2	0.55	0.82	0.29
http://www.ensembl.org/Homo_sapiens/Variation/Summary?v=rs7769417	rs7769417	rs7769417	6	0.99	0.01	0	0	0.00013	0.83	-0.09	0	A	G	0.48	http://www.ncbi.nlm.nih.gov/sites/entrez?Db=gene&Cmd=ShowDetailView&TermToSearch=7287&ordinalpos=1&itool=EntrezSystem2.PEntrez.Gene.Gene_ResultsPanel.Gene_RVDocSum	TULP1	TULP1	0	http://www.ncbi.nlm.nih.gov/sites/entrez?Db=gene&Cmd=ShowDetailView&TermToSearch=7005&ordinalpos=1&itool=EntrezSystem2.PEntrez.Gene.Gene_ResultsPanel.Gene_RVDocSum	TEAD3	TEAD3	8	http://www.ncbi.nlm.nih.gov/sites/entrez?Db=gene&Cmd=ShowDetailView&TermToSearch=4736&ordinalpos=1&itool=EntrezSystem2.PEntrez.Gene.Gene_ResultsPanel.Gene_RVDocSum	RPL10A	RPL10A	34	2.2	0.3	1.6	-0.1	0.065	0.00068	0.18	-0.7	-0.6	-0.4	-0.1	0.6	0.87	0.23
http://www.ensembl.org/Homo_sapiens/Variation/Summary?v=rs2075611	rs2075611	rs2075611	6	0.98	0.02	0	0	0.0001	0.92	-0.09	0	G	A	0.49	http://www.ncbi.nlm.nih.gov/sites/entrez?Db=gene&Cmd=ShowDetailView&TermToSearch=7287&ordinalpos=1&itool=EntrezSystem2.PEntrez.Gene.Gene_ResultsPanel.Gene_RVDocSum	TULP1	TULP1	0	http://www.ncbi.nlm.nih.gov/sites/entrez?Db=gene&Cmd=ShowDetailView&TermToSearch=7005&ordinalpos=1&itool=EntrezSystem2.PEntrez.Gene.Gene_ResultsPanel.Gene_RVDocSum	TEAD3	TEAD3	10	http://www.ncbi.nlm.nih.gov/sites/entrez?Db=gene&Cmd=ShowDetailView&TermToSearch=4736&ordinalpos=1&itool=EntrezSystem2.PEntrez.Gene.Gene_ResultsPanel.Gene_RVDocSum	RPL10A	RPL10A	36	2.3	0.4	1.6	0	0.06	0.00062	0.13	-0.7	-0.6	-0.4	-0.2	0.62	0.87	0.35
http://www.ensembl.org/Homo_sapiens/Variation/Summary?v=rs862438	rs862438	rs862438	6	0.98	0	0	0.01	0.47	2.9e-06	-0.02	0.13	G	T	0.31	http://www.ncbi.nlm.nih.gov/sites/entrez?Db=gene&Cmd=ShowDetailView&TermToSearch=1769&ordinalpos=1&itool=EntrezSystem2.PEntrez.Gene.Gene_ResultsPanel.Gene_RVDocSum	DNAH8	DNAH8	0	http://www.ncbi.nlm.nih.gov/sites/entrez?Db=gene&Cmd=ShowDetailView&TermToSearch=678656&ordinalpos=1&itool=EntrezSystem2.PEntrez.Gene.Gene_ResultsPanel.Gene_RVDocSum	ZRF1PS	ZRF1PS	138	http://www.ncbi.nlm.nih.gov/sites/entrez?Db=gene&Cmd=ShowDetailView&TermToSearch=2740&ordinalpos=1&itool=EntrezSystem2.PEntrez.Gene.Gene_ResultsPanel.Gene_RVDocSum	GLP1R	GLP1R	144	-0.5	-0.5	-0.2	-0.2	0.96	0.18	0.71	3.7	1.4	1	0.2	0.001	0.0048	0.061
http://www.ensembl.org/Homo_sapiens/Variation/Summary?v=rs2281274	rs2281274	rs2281274	6	0.93	0.07	0	0	2.3e-05	0.65	0.15	0.02	C	T	0.2	http://www.ncbi.nlm.nih.gov/sites/entrez?Db=gene&Cmd=ShowDetailView&TermToSearch=60481&ordinalpos=1&itool=EntrezSystem2.PEntrez.Gene.Gene_ResultsPanel.Gene_RVDocSum	ELOVL5	ELOVL5	0	http://www.ncbi.nlm.nih.gov/sites/entrez?Db=gene&Cmd=ShowDetailView&TermToSearch=647190&ordinalpos=1&itool=EntrezSystem2.PEntrez.Gene.Gene_ResultsPanel.Gene_RVDocSum	LOC647190	LOC647190	56	http://www.ncbi.nlm.nih.gov/sites/entrez?Db=gene&Cmd=ShowDetailView&TermToSearch=442217&ordinalpos=1&itool=EntrezSystem2.PEntrez.Gene.Gene_ResultsPanel.Gene_RVDocSum	LOC442217	LOC442217	76	2.9	0.4	1.2	0.2	0.025	0.0024	0.054	-0.5	-0.3	-0.3	-0.2	0.72	0.37	0.43
http://www.ensembl.org/Homo_sapiens/Variation/Summary?v=rs3763183	rs3763183	rs3763183	6	0.99	0.01	0	0	0.00016	0.9	0.23	-0.01	T	A	0.17	http://www.ncbi.nlm.nih.gov/sites/entrez?Db=gene&Cmd=ShowDetailView&TermToSearch=5558&ordinalpos=1&itool=EntrezSystem2.PEntrez.Gene.Gene_ResultsPanel.Gene_RVDocSum	PRIM2A	PRIM2A	0	http://www.ncbi.nlm.nih.gov/sites/entrez?Db=gene&Cmd=ShowDetailView&TermToSearch=51715&ordinalpos=1&itool=EntrezSystem2.PEntrez.Gene.Gene_ResultsPanel.Gene_RVDocSum	RAB23	RAB23	306	http://www.ncbi.nlm.nih.gov/sites/entrez?Db=gene&Cmd=ShowDetailView&TermToSearch=9532&ordinalpos=1&itool=EntrezSystem2.PEntrez.Gene.Gene_ResultsPanel.Gene_RVDocSum	BAG2	BAG2	343	2.1	3	0.2	0.1	9.4e-06	0.076	0.12	-0.3	-0.2	0	-0.1	0.51	0.22	0.83
http://www.ensembl.org/Homo_sapiens/Variation/Summary?v=rs9476082	rs9476082	rs9476082	6	0.99	0.01	0	0	0.00014	0.92	0.2	-0.01	A	T	0.2	http://www.ncbi.nlm.nih.gov/sites/entrez?Db=gene&Cmd=ShowDetailView&TermToSearch=5558&ordinalpos=1&itool=EntrezSystem2.PEntrez.Gene.Gene_ResultsPanel.Gene_RVDocSum	PRIM2A	PRIM2A	0	http://www.ncbi.nlm.nih.gov/sites/entrez?Db=gene&Cmd=ShowDetailView&TermToSearch=51715&ordinalpos=1&itool=EntrezSystem2.PEntrez.Gene.Gene_ResultsPanel.Gene_RVDocSum	RAB23	RAB23	314	http://www.ncbi.nlm.nih.gov/sites/entrez?Db=gene&Cmd=ShowDetailView&TermToSearch=9532&ordinalpos=1&itool=EntrezSystem2.PEntrez.Gene.Gene_ResultsPanel.Gene_RVDocSum	BAG2	BAG2	351	2.2	3.1	0.2	0.1	8.4e-06	0.074	0.12	-0.4	-0.3	0	-0.1	0.5	0.22	0.85
http://www.ensembl.org/Homo_sapiens/Variation/Summary?v=rs7764828	rs7764828	rs7764828	6	0.91	0.09	0	0	6.6e-06	0.78	0.38	0.02	G	A	0.21	http://www.ncbi.nlm.nih.gov/sites/entrez?Db=gene&Cmd=ShowDetailView&TermToSearch=5558&ordinalpos=1&itool=EntrezSystem2.PEntrez.Gene.Gene_ResultsPanel.Gene_RVDocSum	PRIM2A	PRIM2A	0	http://www.ncbi.nlm.nih.gov/sites/entrez?Db=gene&Cmd=ShowDetailView&TermToSearch=51715&ordinalpos=1&itool=EntrezSystem2.PEntrez.Gene.Gene_ResultsPanel.Gene_RVDocSum	RAB23	RAB23	350	http://www.ncbi.nlm.nih.gov/sites/entrez?Db=gene&Cmd=ShowDetailView&TermToSearch=9532&ordinalpos=1&itool=EntrezSystem2.PEntrez.Gene.Gene_ResultsPanel.Gene_RVDocSum	BAG2	BAG2	388	3	3.2	0.1	0	3.7e-06	0.062	0.16	-0.2	-0.2	0	0	0.4	0.25	0.57
http://www.ensembl.org/Homo_sapiens/Variation/Summary?v=rs4715784	rs4715784	rs4715784	6	0.98	0.02	0	0	4.5e-05	0.81	0.36	0.02	C	T	0.22	http://www.ncbi.nlm.nih.gov/sites/entrez?Db=gene&Cmd=ShowDetailView&TermToSearch=5558&ordinalpos=1&itool=EntrezSystem2.PEntrez.Gene.Gene_ResultsPanel.Gene_RVDocSum	PRIM2A	PRIM2A	0	http://www.ncbi.nlm.nih.gov/sites/entrez?Db=gene&Cmd=ShowDetailView&TermToSearch=51715&ordinalpos=1&itool=EntrezSystem2.PEntrez.Gene.Gene_ResultsPanel.Gene_RVDocSum	RAB23	RAB23	358	http://www.ncbi.nlm.nih.gov/sites/entrez?Db=gene&Cmd=ShowDetailView&TermToSearch=9532&ordinalpos=1&itool=EntrezSystem2.PEntrez.Gene.Gene_ResultsPanel.Gene_RVDocSum	BAG2	BAG2	395	2.3	2.3	0.1	0	4.1e-05	0.11	0.35	-0.2	-0.2	0	0	0.46	0.27	0.51
http://www.ensembl.org/Homo_sapiens/Variation/Summary?v=rs9688431	rs9688431	rs9688431	6	0.99	0.01	0	0	0.0002	0.17	0.2	0.07	C	T	0.08	http://www.ncbi.nlm.nih.gov/sites/entrez?Db=gene&Cmd=ShowDetailView&TermToSearch=80759&ordinalpos=1&itool=EntrezSystem2.PEntrez.Gene.Gene_ResultsPanel.Gene_RVDocSum	C6orf148	C6orf148	0	http://www.ncbi.nlm.nih.gov/sites/entrez?Db=gene&Cmd=ShowDetailView&TermToSearch=653194&ordinalpos=1&itool=EntrezSystem2.PEntrez.Gene.Gene_ResultsPanel.Gene_RVDocSum	LOC653194	LOC653194	3	http://www.ncbi.nlm.nih.gov/sites/entrez?Db=gene&Cmd=ShowDetailView&TermToSearch=56479&ordinalpos=1&itool=EntrezSystem2.PEntrez.Gene.Gene_ResultsPanel.Gene_RVDocSum	KCNQ5	KCNQ5	17	2	0.3	0.9	0	0.048	0.0037	0.14	-0.1	-0.3	-0.2	0.5	0.8	0.44	0.017
http://www.ensembl.org/Homo_sapiens/Variation/Summary?v=rs9294403	rs9294403	rs9294403	6	0.93	0.06	0	0	2.1e-05	0.65	0.1	0.01	C	T	0.42	http://www.ncbi.nlm.nih.gov/sites/entrez?Db=gene&Cmd=ShowDetailView&TermToSearch=8732&ordinalpos=1&itool=EntrezSystem2.PEntrez.Gene.Gene_ResultsPanel.Gene_RVDocSum	RNGTT	RNGTT	53	http://www.ncbi.nlm.nih.gov/sites/entrez?Db=gene&Cmd=ShowDetailView&TermToSearch=68&ordinalpos=1&itool=EntrezSystem2.PEntrez.Gene.Gene_ResultsPanel.Gene_RVDocSum	ACTBP8	ACTBP8	279	http://www.ncbi.nlm.nih.gov/sites/entrez?Db=gene&Cmd=ShowDetailView&TermToSearch=644119&ordinalpos=1&itool=EntrezSystem2.PEntrez.Gene.Gene_ResultsPanel.Gene_RVDocSum	LOC644119	LOC644119	291	2.9	2.5	-0.1	-0.1	7e-05	0.13	0.26	-0.6	-0.6	-0.4	-0.2	0.91	0.94	0.26
http://www.ensembl.org/Homo_sapiens/Variation/Summary?v=rs12527253	rs12527253	rs12527253	6	0.6	0.38	0	0.02	1.2e-06	0.83	-0.27	0.01	G	A	0.34	http://www.ncbi.nlm.nih.gov/sites/entrez?Db=gene&Cmd=ShowDetailView&TermToSearch=8732&ordinalpos=1&itool=EntrezSystem2.PEntrez.Gene.Gene_ResultsPanel.Gene_RVDocSum	RNGTT	RNGTT	26	http://www.ncbi.nlm.nih.gov/sites/entrez?Db=gene&Cmd=ShowDetailView&TermToSearch=68&ordinalpos=1&itool=EntrezSystem2.PEntrez.Gene.Gene_ResultsPanel.Gene_RVDocSum	ACTBP8	ACTBP8	307	http://www.ncbi.nlm.nih.gov/sites/entrez?Db=gene&Cmd=ShowDetailView&TermToSearch=644119&ordinalpos=1&itool=EntrezSystem2.PEntrez.Gene.Gene_ResultsPanel.Gene_RVDocSum	LOC644119	LOC644119	318	3.9	2.3	0.7	0	7e-05	0.0085	0.21	-0.4	-0.3	-0.2	-0.1	0.82	0.49	0.39
http://www.ensembl.org/Homo_sapiens/Variation/Summary?v=rs11759246	rs11759246	rs11759246	6	0.97	0.01	0	0.01	4.8e-05	0.0038	0.42	-0.3	G	A	0.05	http://www.ncbi.nlm.nih.gov/sites/entrez?Db=gene&Cmd=ShowDetailView&TermToSearch=135114&ordinalpos=1&itool=EntrezSystem2.PEntrez.Gene.Gene_ResultsPanel.Gene_RVDocSum	HINT3	HINT3	12	http://www.ncbi.nlm.nih.gov/sites/entrez?Db=gene&Cmd=ShowDetailView&TermToSearch=135112&ordinalpos=1&itool=EntrezSystem2.PEntrez.Gene.Gene_ResultsPanel.Gene_RVDocSum	NCOA7	NCOA7	14	http://www.ncbi.nlm.nih.gov/sites/entrez?Db=gene&Cmd=ShowDetailView&TermToSearch=60487&ordinalpos=1&itool=EntrezSystem2.PEntrez.Gene.Gene_ResultsPanel.Gene_RVDocSum	C6orf75	C6orf75	41	2.2	0.7	1	0	0.00082	0.0016	0.33	0.9	0	0.5	0.1	0.73	0.013	0.11
http://www.ensembl.org/Homo_sapiens/Variation/Summary?v=rs10085329	rs10085329	rs10085329	6	0.99	0.01	0	0	0.0002	0.96	-0.12	0	G	A	0.15	http://www.ncbi.nlm.nih.gov/sites/entrez?Db=gene&Cmd=ShowDetailView&TermToSearch=645434&ordinalpos=1&itool=EntrezSystem2.PEntrez.Gene.Gene_ResultsPanel.Gene_RVDocSum	LOC645434	LOC645434	33	http://www.ncbi.nlm.nih.gov/sites/entrez?Db=gene&Cmd=ShowDetailView&TermToSearch=10370&ordinalpos=1&itool=EntrezSystem2.PEntrez.Gene.Gene_ResultsPanel.Gene_RVDocSum	CITED2	CITED2	62	http://www.ncbi.nlm.nih.gov/sites/entrez?Db=gene&Cmd=ShowDetailView&TermToSearch=167838&ordinalpos=1&itool=EntrezSystem2.PEntrez.Gene.Gene_ResultsPanel.Gene_RVDocSum	TXLNB	TXLNB	144	2.1	1	0.7	-0.2	0.0039	0.0094	0.69	-0.4	0.2	-0.1	-0.2	0.27	0.22	0.8
http://www.ensembl.org/Homo_sapiens/Variation/Summary?v=rs146250	rs146250	rs146250	6	0.99	0.01	0	0	0.00019	0.11	-0.16	-0.07	A	G	0.09	http://www.ncbi.nlm.nih.gov/sites/entrez?Db=gene&Cmd=ShowDetailView&TermToSearch=57211&ordinalpos=1&itool=EntrezSystem2.PEntrez.Gene.Gene_ResultsPanel.Gene_RVDocSum	GPR126	GPR126	121	http://www.ncbi.nlm.nih.gov/sites/entrez?Db=gene&Cmd=ShowDetailView&TermToSearch=3097&ordinalpos=1&itool=EntrezSystem2.PEntrez.Gene.Gene_ResultsPanel.Gene_RVDocSum	HIVEP2	HIVEP2	184	http://www.ncbi.nlm.nih.gov/sites/entrez?Db=gene&Cmd=ShowDetailView&TermToSearch=51534&ordinalpos=1&itool=EntrezSystem2.PEntrez.Gene.Gene_ResultsPanel.Gene_RVDocSum	C6orf55	C6orf55	346	2.1	1.9	0	-0.2	0.00028	0.14	0.78	0	0.5	-0.1	-0.1	0.021	0.23	0.42
http://www.ensembl.org/Homo_sapiens/Variation/Summary?v=rs9377172	rs9377172	rs9377172	6	0.98	0.02	0	0	0.00011	0.28	0.19	-0.05	A	G	0.07	http://www.ncbi.nlm.nih.gov/sites/entrez?Db=gene&Cmd=ShowDetailView&TermToSearch=10090&ordinalpos=1&itool=EntrezSystem2.PEntrez.Gene.Gene_ResultsPanel.Gene_RVDocSum	UST	UST	0	http://www.ncbi.nlm.nih.gov/sites/entrez?Db=gene&Cmd=ShowDetailView&TermToSearch=645934&ordinalpos=1&itool=EntrezSystem2.PEntrez.Gene.Gene_ResultsPanel.Gene_RVDocSum	LOC645934	LOC645934	137	http://www.ncbi.nlm.nih.gov/sites/entrez?Db=gene&Cmd=ShowDetailView&TermToSearch=729200&ordinalpos=1&itool=EntrezSystem2.PEntrez.Gene.Gene_ResultsPanel.Gene_RVDocSum	LOC729200	LOC729200	227	2.3	1	0.8	-0.1	0.004	0.0064	0.44	-0.2	0.5	-0.3	-0.1	0.021	0.81	0.26
http://www.ensembl.org/Homo_sapiens/Variation/Summary?v=rs7752799	rs7752799	rs7752799	6	0.99	0.01	0	0	0.004	0.47	0.07	-0.02	A	C	0.33	http://www.ncbi.nlm.nih.gov/sites/entrez?Db=gene&Cmd=ShowDetailView&TermToSearch=728275&ordinalpos=1&itool=EntrezSystem2.PEntrez.Gene.Gene_ResultsPanel.Gene_RVDocSum	LOC728275	LOC728275	157	http://www.ncbi.nlm.nih.gov/sites/entrez?Db=gene&Cmd=ShowDetailView&TermToSearch=9444&ordinalpos=1&itool=EntrezSystem2.PEntrez.Gene.Gene_ResultsPanel.Gene_RVDocSum	QKI	QKI	192	http://www.ncbi.nlm.nih.gov/sites/entrez?Db=gene&Cmd=ShowDetailView&TermToSearch=135138&ordinalpos=1&itool=EntrezSystem2.PEntrez.Gene.Gene_ResultsPanel.Gene_RVDocSum	PACRG	PACRG	451	2.1	1.5	-0.3	-0.2	0.0043	0.44	0.43	-0.6	-0.4	-0.4	-0.3	0.39	0.71	0.75
http://www.ensembl.org/Homo_sapiens/Variation/Summary?v=rs4145096	rs4145096	rs4145096	6	0.98	0.02	0	0	0.00016	0.84	0.09	0	A	C	0.47	http://www.ncbi.nlm.nih.gov/sites/entrez?Db=gene&Cmd=ShowDetailView&TermToSearch=441177&ordinalpos=1&itool=EntrezSystem2.PEntrez.Gene.Gene_ResultsPanel.Gene_RVDocSum	LOC441177	LOC441177	26	http://www.ncbi.nlm.nih.gov/sites/entrez?Db=gene&Cmd=ShowDetailView&TermToSearch=90632&ordinalpos=1&itool=EntrezSystem2.PEntrez.Gene.Gene_ResultsPanel.Gene_RVDocSum	C6orf176	C6orf176	28	http://www.ncbi.nlm.nih.gov/sites/entrez?Db=gene&Cmd=ShowDetailView&TermToSearch=346085&ordinalpos=1&itool=EntrezSystem2.PEntrez.Gene.Gene_ResultsPanel.Gene_RVDocSum	LOC346085	LOC346085	49	2.3	-0.2	0.6	1.6	0.17	0.014	0.00054	-0.8	-0.5	-0.5	-0.4	0.44	0.78	0.68
http://www.ensembl.org/Homo_sapiens/Variation/Summary?v=rs705825	rs705825	rs705825	6	0.98	0.02	0	0	7.5e-05	0.9	0.1	0	G	A	0.44	http://www.ncbi.nlm.nih.gov/sites/entrez?Db=gene&Cmd=ShowDetailView&TermToSearch=346085&ordinalpos=1&itool=EntrezSystem2.PEntrez.Gene.Gene_ResultsPanel.Gene_RVDocSum	LOC346085	LOC346085	8	http://www.ncbi.nlm.nih.gov/sites/entrez?Db=gene&Cmd=ShowDetailView&TermToSearch=729681&ordinalpos=1&itool=EntrezSystem2.PEntrez.Gene.Gene_ResultsPanel.Gene_RVDocSum	LOC729681	LOC729681	42	http://www.ncbi.nlm.nih.gov/sites/entrez?Db=gene&Cmd=ShowDetailView&TermToSearch=441177&ordinalpos=1&itool=EntrezSystem2.PEntrez.Gene.Gene_ResultsPanel.Gene_RVDocSum	LOC441177	LOC441177	67	2.4	-0.2	0.6	2.4	0.15	0.018	5.7e-05	-0.7	-0.6	-0.4	-0.3	0.73	0.55	0.54
http://www.ensembl.org/Homo_sapiens/Variation/Summary?v=rs4710003	rs4710003	rs4710003	6	0.98	0.02	0	0	7.6e-05	0.9	0.1	0	C	A	0.44	http://www.ncbi.nlm.nih.gov/sites/entrez?Db=gene&Cmd=ShowDetailView&TermToSearch=346085&ordinalpos=1&itool=EntrezSystem2.PEntrez.Gene.Gene_ResultsPanel.Gene_RVDocSum	LOC346085	LOC346085	7	http://www.ncbi.nlm.nih.gov/sites/entrez?Db=gene&Cmd=ShowDetailView&TermToSearch=729681&ordinalpos=1&itool=EntrezSystem2.PEntrez.Gene.Gene_ResultsPanel.Gene_RVDocSum	LOC729681	LOC729681	41	http://www.ncbi.nlm.nih.gov/sites/entrez?Db=gene&Cmd=ShowDetailView&TermToSearch=441177&ordinalpos=1&itool=EntrezSystem2.PEntrez.Gene.Gene_ResultsPanel.Gene_RVDocSum	LOC441177	LOC441177	67	2.4	-0.2	0.6	2.4	0.15	0.018	5.7e-05	-0.7	-0.6	-0.4	-0.3	0.73	0.55	0.54
http://www.ensembl.org/Homo_sapiens/Variation/Summary?v=rs10270805	rs10270805	rs10270805	7	0.99	0.01	0	0	0.0002	0.17	-0.18	-0.07	A	G	0.07	http://www.ncbi.nlm.nih.gov/sites/entrez?Db=gene&Cmd=ShowDetailView&TermToSearch=25928&ordinalpos=1&itool=EntrezSystem2.PEntrez.Gene.Gene_ResultsPanel.Gene_RVDocSum	SOSTDC1	SOSTDC1	1	http://www.ncbi.nlm.nih.gov/sites/entrez?Db=gene&Cmd=ShowDetailView&TermToSearch=442511&ordinalpos=1&itool=EntrezSystem2.PEntrez.Gene.Gene_ResultsPanel.Gene_RVDocSum	LOC442511	LOC442511	39	http://www.ncbi.nlm.nih.gov/sites/entrez?Db=gene&Cmd=ShowDetailView&TermToSearch=729920&ordinalpos=1&itool=EntrezSystem2.PEntrez.Gene.Gene_ResultsPanel.Gene_RVDocSum	LOC729920	LOC729920	84	2	0.1	1.3	0.1	0.12	0.0015	0.1	-0.1	-0.1	-0.3	0.2	0.28	0.92	0.063
http://www.ensembl.org/Homo_sapiens/Variation/Summary?v=rs9791629	rs9791629	rs9791629	7	0.99	0.01	0	0	0.0002	0.17	-0.18	-0.07	C	T	0.07	http://www.ncbi.nlm.nih.gov/sites/entrez?Db=gene&Cmd=ShowDetailView&TermToSearch=25928&ordinalpos=1&itool=EntrezSystem2.PEntrez.Gene.Gene_ResultsPanel.Gene_RVDocSum	SOSTDC1	SOSTDC1	1	http://www.ncbi.nlm.nih.gov/sites/entrez?Db=gene&Cmd=ShowDetailView&TermToSearch=442511&ordinalpos=1&itool=EntrezSystem2.PEntrez.Gene.Gene_ResultsPanel.Gene_RVDocSum	LOC442511	LOC442511	39	http://www.ncbi.nlm.nih.gov/sites/entrez?Db=gene&Cmd=ShowDetailView&TermToSearch=729920&ordinalpos=1&itool=EntrezSystem2.PEntrez.Gene.Gene_ResultsPanel.Gene_RVDocSum	LOC729920	LOC729920	84	2	0.1	1.3	0.1	0.12	0.0015	0.1	-0.1	-0.1	-0.3	0.2	0.28	0.92	0.063
http://www.ensembl.org/Homo_sapiens/Variation/Summary?v=rs1960321	rs1960321	rs1960321	7	0.86	0.13	0	0.01	8.5e-06	0.16	0.12	-0.04	T	C	0.35	http://www.ncbi.nlm.nih.gov/sites/entrez?Db=gene&Cmd=ShowDetailView&TermToSearch=168417&ordinalpos=1&itool=EntrezSystem2.PEntrez.Gene.Gene_ResultsPanel.Gene_RVDocSum	ZNF679	ZNF679	4	http://www.ncbi.nlm.nih.gov/sites/entrez?Db=gene&Cmd=ShowDetailView&TermToSearch=728927&ordinalpos=1&itool=EntrezSystem2.PEntrez.Gene.Gene_ResultsPanel.Gene_RVDocSum	LOC728927	LOC728927	61	http://www.ncbi.nlm.nih.gov/sites/entrez?Db=gene&Cmd=ShowDetailView&TermToSearch=442320&ordinalpos=1&itool=EntrezSystem2.PEntrez.Gene.Gene_ResultsPanel.Gene_RVDocSum	LOC442320	LOC442320	88	3.2	0.8	0.3	1.7	0.0083	0.043	0.0004	-0.3	-0.2	-0.3	-0.3	0.22	0.32	0.93
http://www.ensembl.org/Homo_sapiens/Variation/Summary?v=rs6972236	rs6972236	rs6972236	7	0.86	0.13	0	0.01	8.3e-06	0.16	0.12	-0.04	C	T	0.35	http://www.ncbi.nlm.nih.gov/sites/entrez?Db=gene&Cmd=ShowDetailView&TermToSearch=168417&ordinalpos=1&itool=EntrezSystem2.PEntrez.Gene.Gene_ResultsPanel.Gene_RVDocSum	ZNF679	ZNF679	5	http://www.ncbi.nlm.nih.gov/sites/entrez?Db=gene&Cmd=ShowDetailView&TermToSearch=728927&ordinalpos=1&itool=EntrezSystem2.PEntrez.Gene.Gene_ResultsPanel.Gene_RVDocSum	LOC728927	LOC728927	60	http://www.ncbi.nlm.nih.gov/sites/entrez?Db=gene&Cmd=ShowDetailView&TermToSearch=442320&ordinalpos=1&itool=EntrezSystem2.PEntrez.Gene.Gene_ResultsPanel.Gene_RVDocSum	LOC442320	LOC442320	89	3.2	0.8	0.3	1.7	0.0082	0.043	0.0004	-0.3	-0.2	-0.3	-0.3	0.22	0.32	0.93
http://www.ensembl.org/Homo_sapiens/Variation/Summary?v=rs10266483	rs10266483	rs10266483	7	0.86	0.14	0	0.01	7.9e-06	0.17	0.12	-0.04	A	G	0.35	http://www.ncbi.nlm.nih.gov/sites/entrez?Db=gene&Cmd=ShowDetailView&TermToSearch=168417&ordinalpos=1&itool=EntrezSystem2.PEntrez.Gene.Gene_ResultsPanel.Gene_RVDocSum	ZNF679	ZNF679	6	http://www.ncbi.nlm.nih.gov/sites/entrez?Db=gene&Cmd=ShowDetailView&TermToSearch=728927&ordinalpos=1&itool=EntrezSystem2.PEntrez.Gene.Gene_ResultsPanel.Gene_RVDocSum	LOC728927	LOC728927	59	http://www.ncbi.nlm.nih.gov/sites/entrez?Db=gene&Cmd=ShowDetailView&TermToSearch=442320&ordinalpos=1&itool=EntrezSystem2.PEntrez.Gene.Gene_ResultsPanel.Gene_RVDocSum	LOC442320	LOC442320	90	3.2	0.8	0.3	1.7	0.0076	0.043	0.0004	-0.3	-0.3	-0.3	-0.3	0.24	0.31	0.92
http://www.ensembl.org/Homo_sapiens/Variation/Summary?v=rs6955976	rs6955976	rs6955976	7	0.98	0.02	0	0	0.00011	0.044	0.12	-0.06	C	G	0.27	http://www.ncbi.nlm.nih.gov/sites/entrez?Db=gene&Cmd=ShowDetailView&TermToSearch=168417&ordinalpos=1&itool=EntrezSystem2.PEntrez.Gene.Gene_ResultsPanel.Gene_RVDocSum	ZNF679	ZNF679	10	http://www.ncbi.nlm.nih.gov/sites/entrez?Db=gene&Cmd=ShowDetailView&TermToSearch=728927&ordinalpos=1&itool=EntrezSystem2.PEntrez.Gene.Gene_ResultsPanel.Gene_RVDocSum	LOC728927	LOC728927	55	http://www.ncbi.nlm.nih.gov/sites/entrez?Db=gene&Cmd=ShowDetailView&TermToSearch=442320&ordinalpos=1&itool=EntrezSystem2.PEntrez.Gene.Gene_ResultsPanel.Gene_RVDocSum	LOC442320	LOC442320	93	2.2	0.4	0.1	1.3	0.026	0.079	0.0012	0.1	-0.2	-0.2	-0.1	0.17	0.26	0.31
http://www.ensembl.org/Homo_sapiens/Variation/Summary?v=rs13221291	rs13221291	rs13221291	7	0.95	0.05	0	0	3e-05	0.23	0.11	-0.03	G	A	0.35	http://www.ncbi.nlm.nih.gov/sites/entrez?Db=gene&Cmd=ShowDetailView&TermToSearch=168417&ordinalpos=1&itool=EntrezSystem2.PEntrez.Gene.Gene_ResultsPanel.Gene_RVDocSum	ZNF679	ZNF679	12	http://www.ncbi.nlm.nih.gov/sites/entrez?Db=gene&Cmd=ShowDetailView&TermToSearch=728927&ordinalpos=1&itool=EntrezSystem2.PEntrez.Gene.Gene_ResultsPanel.Gene_RVDocSum	LOC728927	LOC728927	53	http://www.ncbi.nlm.nih.gov/sites/entrez?Db=gene&Cmd=ShowDetailView&TermToSearch=442320&ordinalpos=1&itool=EntrezSystem2.PEntrez.Gene.Gene_ResultsPanel.Gene_RVDocSum	LOC442320	LOC442320	96	2.7	1	-0.1	1.2	0.0033	0.14	0.0016	-0.4	-0.3	-0.4	-0.3	0.29	0.43	0.97
http://www.ensembl.org/Homo_sapiens/Variation/Summary?v=rs683689	rs683689	rs683689	7	0.91	0.08	0	0	1.4e-05	0.24	0.11	-0.03	G	C	0.32	http://www.ncbi.nlm.nih.gov/sites/entrez?Db=gene&Cmd=ShowDetailView&TermToSearch=168417&ordinalpos=1&itool=EntrezSystem2.PEntrez.Gene.Gene_ResultsPanel.Gene_RVDocSum	ZNF679	ZNF679	15	http://www.ncbi.nlm.nih.gov/sites/entrez?Db=gene&Cmd=ShowDetailView&TermToSearch=728927&ordinalpos=1&itool=EntrezSystem2.PEntrez.Gene.Gene_ResultsPanel.Gene_RVDocSum	LOC728927	LOC728927	49	http://www.ncbi.nlm.nih.gov/sites/entrez?Db=gene&Cmd=ShowDetailView&TermToSearch=442320&ordinalpos=1&itool=EntrezSystem2.PEntrez.Gene.Gene_ResultsPanel.Gene_RVDocSum	LOC442320	LOC442320	99	3	0.6	0.2	1.8	0.011	0.054	0.00026	-0.5	-0.4	-0.3	-0.3	0.31	0.33	0.74
http://www.ensembl.org/Homo_sapiens/Variation/Summary?v=rs651934	rs651934	rs651934	7	0.9	0.09	0	0	1.3e-05	0.27	0.11	-0.03	C	T	0.32	http://www.ncbi.nlm.nih.gov/sites/entrez?Db=gene&Cmd=ShowDetailView&TermToSearch=168417&ordinalpos=1&itool=EntrezSystem2.PEntrez.Gene.Gene_ResultsPanel.Gene_RVDocSum	ZNF679	ZNF679	17	http://www.ncbi.nlm.nih.gov/sites/entrez?Db=gene&Cmd=ShowDetailView&TermToSearch=728927&ordinalpos=1&itool=EntrezSystem2.PEntrez.Gene.Gene_ResultsPanel.Gene_RVDocSum	LOC728927	LOC728927	48	http://www.ncbi.nlm.nih.gov/sites/entrez?Db=gene&Cmd=ShowDetailView&TermToSearch=442320&ordinalpos=1&itool=EntrezSystem2.PEntrez.Gene.Gene_ResultsPanel.Gene_RVDocSum	LOC442320	LOC442320	101	3.1	0.6	0.2	1.9	0.012	0.051	0.00023	-0.5	-0.4	-0.3	-0.3	0.32	0.34	0.7
http://www.ensembl.org/Homo_sapiens/Variation/Summary?v=rs687547	rs687547	rs687547	7	0.91	0.09	0	0	1.3e-05	0.26	0.11	-0.03	T	C	0.36	http://www.ncbi.nlm.nih.gov/sites/entrez?Db=gene&Cmd=ShowDetailView&TermToSearch=168417&ordinalpos=1&itool=EntrezSystem2.PEntrez.Gene.Gene_ResultsPanel.Gene_RVDocSum	ZNF679	ZNF679	18	http://www.ncbi.nlm.nih.gov/sites/entrez?Db=gene&Cmd=ShowDetailView&TermToSearch=728927&ordinalpos=1&itool=EntrezSystem2.PEntrez.Gene.Gene_ResultsPanel.Gene_RVDocSum	LOC728927	LOC728927	47	http://www.ncbi.nlm.nih.gov/sites/entrez?Db=gene&Cmd=ShowDetailView&TermToSearch=442320&ordinalpos=1&itool=EntrezSystem2.PEntrez.Gene.Gene_ResultsPanel.Gene_RVDocSum	LOC442320	LOC442320	101	3	1.1	0	1.5	0.0026	0.11	0.0008	-0.5	-0.4	-0.4	-0.3	0.31	0.42	0.89
http://www.ensembl.org/Homo_sapiens/Variation/Summary?v=rs624257	rs624257	rs624257	7	0.91	0.09	0	0	1.3e-05	0.26	0.11	-0.03	G	A	0.36	http://www.ncbi.nlm.nih.gov/sites/entrez?Db=gene&Cmd=ShowDetailView&TermToSearch=168417&ordinalpos=1&itool=EntrezSystem2.PEntrez.Gene.Gene_ResultsPanel.Gene_RVDocSum	ZNF679	ZNF679	18	http://www.ncbi.nlm.nih.gov/sites/entrez?Db=gene&Cmd=ShowDetailView&TermToSearch=728927&ordinalpos=1&itool=EntrezSystem2.PEntrez.Gene.Gene_ResultsPanel.Gene_RVDocSum	LOC728927	LOC728927	47	http://www.ncbi.nlm.nih.gov/sites/entrez?Db=gene&Cmd=ShowDetailView&TermToSearch=442320&ordinalpos=1&itool=EntrezSystem2.PEntrez.Gene.Gene_ResultsPanel.Gene_RVDocSum	LOC442320	LOC442320	102	3	1.1	0	1.5	0.0027	0.11	0.0008	-0.5	-0.4	-0.4	-0.3	0.31	0.42	0.89
http://www.ensembl.org/Homo_sapiens/Variation/Summary?v=rs683510	rs683510	rs683510	7	0.93	0.07	0	0	1.7e-05	0.28	0.11	-0.03	A	C	0.32	http://www.ncbi.nlm.nih.gov/sites/entrez?Db=gene&Cmd=ShowDetailView&TermToSearch=168417&ordinalpos=1&itool=EntrezSystem2.PEntrez.Gene.Gene_ResultsPanel.Gene_RVDocSum	ZNF679	ZNF679	22	http://www.ncbi.nlm.nih.gov/sites/entrez?Db=gene&Cmd=ShowDetailView&TermToSearch=728927&ordinalpos=1&itool=EntrezSystem2.PEntrez.Gene.Gene_ResultsPanel.Gene_RVDocSum	LOC728927	LOC728927	43	http://www.ncbi.nlm.nih.gov/sites/entrez?Db=gene&Cmd=ShowDetailView&TermToSearch=442320&ordinalpos=1&itool=EntrezSystem2.PEntrez.Gene.Gene_ResultsPanel.Gene_RVDocSum	LOC442320	LOC442320	106	2.9	0.7	0.1	1.7	0.009	0.069	0.00036	-0.5	-0.4	-0.4	-0.3	0.28	0.42	0.67
http://www.ensembl.org/Homo_sapiens/Variation/Summary?v=rs679883	rs679883	rs679883	7	0.93	0.07	0	0	1.9e-05	0.27	0.11	-0.03	T	C	0.32	http://www.ncbi.nlm.nih.gov/sites/entrez?Db=gene&Cmd=ShowDetailView&TermToSearch=168417&ordinalpos=1&itool=EntrezSystem2.PEntrez.Gene.Gene_ResultsPanel.Gene_RVDocSum	ZNF679	ZNF679	23	http://www.ncbi.nlm.nih.gov/sites/entrez?Db=gene&Cmd=ShowDetailView&TermToSearch=728927&ordinalpos=1&itool=EntrezSystem2.PEntrez.Gene.Gene_ResultsPanel.Gene_RVDocSum	LOC728927	LOC728927	42	http://www.ncbi.nlm.nih.gov/sites/entrez?Db=gene&Cmd=ShowDetailView&TermToSearch=442320&ordinalpos=1&itool=EntrezSystem2.PEntrez.Gene.Gene_ResultsPanel.Gene_RVDocSum	LOC442320	LOC442320	107	2.9	0.7	0.1	1.7	0.0092	0.073	0.00037	-0.5	-0.4	-0.4	-0.3	0.27	0.42	0.67
http://www.ensembl.org/Homo_sapiens/Variation/Summary?v=rs667644	rs667644	rs667644	7	0.93	0.06	0	0	2e-05	0.27	0.11	-0.03	C	A	0.32	http://www.ncbi.nlm.nih.gov/sites/entrez?Db=gene&Cmd=ShowDetailView&TermToSearch=168417&ordinalpos=1&itool=EntrezSystem2.PEntrez.Gene.Gene_ResultsPanel.Gene_RVDocSum	ZNF679	ZNF679	23	http://www.ncbi.nlm.nih.gov/sites/entrez?Db=gene&Cmd=ShowDetailView&TermToSearch=728927&ordinalpos=1&itool=EntrezSystem2.PEntrez.Gene.Gene_ResultsPanel.Gene_RVDocSum	LOC728927	LOC728927	41	http://www.ncbi.nlm.nih.gov/sites/entrez?Db=gene&Cmd=ShowDetailView&TermToSearch=442320&ordinalpos=1&itool=EntrezSystem2.PEntrez.Gene.Gene_ResultsPanel.Gene_RVDocSum	LOC442320	LOC442320	107	2.9	0.7	0.1	1.7	0.0092	0.075	0.00038	-0.5	-0.4	-0.4	-0.3	0.27	0.41	0.68
http://www.ensembl.org/Homo_sapiens/Variation/Summary?v=rs10237623	rs10237623	rs10237623	7	0.99	0.01	0	0	0.00021	0.69	0.14	-0.02	C	G	0.12	http://www.ncbi.nlm.nih.gov/sites/entrez?Db=gene&Cmd=ShowDetailView&TermToSearch=1021&ordinalpos=1&itool=EntrezSystem2.PEntrez.Gene.Gene_ResultsPanel.Gene_RVDocSum	CDK6	CDK6	24	http://www.ncbi.nlm.nih.gov/sites/entrez?Db=gene&Cmd=ShowDetailView&TermToSearch=54809&ordinalpos=1&itool=EntrezSystem2.PEntrez.Gene.Gene_ResultsPanel.Gene_RVDocSum	SAMD9	SAMD9	241	http://www.ncbi.nlm.nih.gov/sites/entrez?Db=gene&Cmd=ShowDetailView&TermToSearch=257415&ordinalpos=1&itool=EntrezSystem2.PEntrez.Gene.Gene_ResultsPanel.Gene_RVDocSum	MGC40405	MGC40405	268	2.1	0.5	1.4	-0.2	0.027	0.0014	0.52	-0.5	-0.2	-0.2	-0.2	0.33	0.46	0.62
http://www.ensembl.org/Homo_sapiens/Variation/Summary?v=rs1029982	rs1029982	rs1029982	7	0.98	0.01	0	0	0.00011	0.2	-0.22	0.07	C	T	0.09	http://www.ncbi.nlm.nih.gov/sites/entrez?Db=gene&Cmd=ShowDetailView&TermToSearch=10135&ordinalpos=1&itool=EntrezSystem2.PEntrez.Gene.Gene_ResultsPanel.Gene_RVDocSum	PBEF1	PBEF1	27	http://www.ncbi.nlm.nih.gov/sites/entrez?Db=gene&Cmd=ShowDetailView&TermToSearch=6856&ordinalpos=1&itool=EntrezSystem2.PEntrez.Gene.Gene_ResultsPanel.Gene_RVDocSum	SYPL1	SYPL1	199	http://www.ncbi.nlm.nih.gov/sites/entrez?Db=gene&Cmd=ShowDetailView&TermToSearch=222256&ordinalpos=1&itool=EntrezSystem2.PEntrez.Gene.Gene_ResultsPanel.Gene_RVDocSum	FLJ23834	FLJ23834	278	2.2	0.5	2	-0.2	0.017	0.00012	0.73	-0.1	0	-0.2	0.1	0.17	0.73	0.13
http://www.ensembl.org/Homo_sapiens/Variation/Summary?v=rs9692084	rs9692084	rs9692084	7	0.99	0.01	0	0	0.00013	0.13	-0.22	0.09	C	T	0.07	http://www.ncbi.nlm.nih.gov/sites/entrez?Db=gene&Cmd=ShowDetailView&TermToSearch=10135&ordinalpos=1&itool=EntrezSystem2.PEntrez.Gene.Gene_ResultsPanel.Gene_RVDocSum	PBEF1	PBEF1	30	http://www.ncbi.nlm.nih.gov/sites/entrez?Db=gene&Cmd=ShowDetailView&TermToSearch=6856&ordinalpos=1&itool=EntrezSystem2.PEntrez.Gene.Gene_ResultsPanel.Gene_RVDocSum	SYPL1	SYPL1	202	http://www.ncbi.nlm.nih.gov/sites/entrez?Db=gene&Cmd=ShowDetailView&TermToSearch=222256&ordinalpos=1&itool=EntrezSystem2.PEntrez.Gene.Gene_ResultsPanel.Gene_RVDocSum	FLJ23834	FLJ23834	281	2.2	0.7	1.8	-0.1	0.011	0.00018	0.6	0	-0.1	-0.2	0.2	0.23	0.93	0.054
http://www.ensembl.org/Homo_sapiens/Variation/Summary?v=rs17315097	rs17315097	rs17315097	7	0.98	0.02	0	0	7e-05	0.17	-0.23	0.08	A	G	0.07	http://www.ncbi.nlm.nih.gov/sites/entrez?Db=gene&Cmd=ShowDetailView&TermToSearch=10135&ordinalpos=1&itool=EntrezSystem2.PEntrez.Gene.Gene_ResultsPanel.Gene_RVDocSum	PBEF1	PBEF1	31	http://www.ncbi.nlm.nih.gov/sites/entrez?Db=gene&Cmd=ShowDetailView&TermToSearch=6856&ordinalpos=1&itool=EntrezSystem2.PEntrez.Gene.Gene_ResultsPanel.Gene_RVDocSum	SYPL1	SYPL1	203	http://www.ncbi.nlm.nih.gov/sites/entrez?Db=gene&Cmd=ShowDetailView&TermToSearch=222256&ordinalpos=1&itool=EntrezSystem2.PEntrez.Gene.Gene_ResultsPanel.Gene_RVDocSum	FLJ23834	FLJ23834	282	2.4	0.8	1.9	-0.1	0.0087	0.00015	0.75	-0.1	-0.1	-0.2	0.1	0.24	0.91	0.11
http://www.ensembl.org/Homo_sapiens/Variation/Summary?v=rs2519679	rs2519679	rs2519679	7	0.99	0.01	0	0	0.00015	0.18	-0.2	0.07	G	A	0.07	http://www.ncbi.nlm.nih.gov/sites/entrez?Db=gene&Cmd=ShowDetailView&TermToSearch=10135&ordinalpos=1&itool=EntrezSystem2.PEntrez.Gene.Gene_ResultsPanel.Gene_RVDocSum	PBEF1	PBEF1	63	http://www.ncbi.nlm.nih.gov/sites/entrez?Db=gene&Cmd=ShowDetailView&TermToSearch=6856&ordinalpos=1&itool=EntrezSystem2.PEntrez.Gene.Gene_ResultsPanel.Gene_RVDocSum	SYPL1	SYPL1	236	http://www.ncbi.nlm.nih.gov/sites/entrez?Db=gene&Cmd=ShowDetailView&TermToSearch=730026&ordinalpos=1&itool=EntrezSystem2.PEntrez.Gene.Gene_ResultsPanel.Gene_RVDocSum	LOC730026	LOC730026	283	2.2	0.8	1.5	-0.1	0.0074	0.00059	0.72	-0.1	-0.1	-0.2	0	0.26	0.91	0.23
http://www.ensembl.org/Homo_sapiens/Variation/Summary?v=rs2519676	rs2519676	rs2519676	7	0.99	0.01	0	0	0.00014	0.18	-0.2	0.07	T	A	0.07	http://www.ncbi.nlm.nih.gov/sites/entrez?Db=gene&Cmd=ShowDetailView&TermToSearch=10135&ordinalpos=1&itool=EntrezSystem2.PEntrez.Gene.Gene_ResultsPanel.Gene_RVDocSum	PBEF1	PBEF1	64	http://www.ncbi.nlm.nih.gov/sites/entrez?Db=gene&Cmd=ShowDetailView&TermToSearch=6856&ordinalpos=1&itool=EntrezSystem2.PEntrez.Gene.Gene_ResultsPanel.Gene_RVDocSum	SYPL1	SYPL1	236	http://www.ncbi.nlm.nih.gov/sites/entrez?Db=gene&Cmd=ShowDetailView&TermToSearch=730026&ordinalpos=1&itool=EntrezSystem2.PEntrez.Gene.Gene_ResultsPanel.Gene_RVDocSum	LOC730026	LOC730026	283	2.2	0.8	1.4	-0.1	0.0072	0.00059	0.72	-0.1	-0.1	-0.2	0	0.25	0.9	0.24
http://www.ensembl.org/Homo_sapiens/Variation/Summary?v=rs2704938	rs2704938	rs2704938	7	0.99	0.01	0	0	0.00015	0.17	-0.2	0.07	T	C	0.07	http://www.ncbi.nlm.nih.gov/sites/entrez?Db=gene&Cmd=ShowDetailView&TermToSearch=10135&ordinalpos=1&itool=EntrezSystem2.PEntrez.Gene.Gene_ResultsPanel.Gene_RVDocSum	PBEF1	PBEF1	64	http://www.ncbi.nlm.nih.gov/sites/entrez?Db=gene&Cmd=ShowDetailView&TermToSearch=6856&ordinalpos=1&itool=EntrezSystem2.PEntrez.Gene.Gene_ResultsPanel.Gene_RVDocSum	SYPL1	SYPL1	236	http://www.ncbi.nlm.nih.gov/sites/entrez?Db=gene&Cmd=ShowDetailView&TermToSearch=730026&ordinalpos=1&itool=EntrezSystem2.PEntrez.Gene.Gene_ResultsPanel.Gene_RVDocSum	LOC730026	LOC730026	283	2.2	0.8	1.4	-0.1	0.0073	0.00064	0.74	-0.1	-0.1	-0.2	0	0.25	0.88	0.26
http://www.ensembl.org/Homo_sapiens/Variation/Summary?v=rs2214004	rs2214004	rs2214004	7	0.99	0.01	0	0	0.00017	0.18	-0.2	0.07	A	G	0.07	http://www.ncbi.nlm.nih.gov/sites/entrez?Db=gene&Cmd=ShowDetailView&TermToSearch=10135&ordinalpos=1&itool=EntrezSystem2.PEntrez.Gene.Gene_ResultsPanel.Gene_RVDocSum	PBEF1	PBEF1	68	http://www.ncbi.nlm.nih.gov/sites/entrez?Db=gene&Cmd=ShowDetailView&TermToSearch=6856&ordinalpos=1&itool=EntrezSystem2.PEntrez.Gene.Gene_ResultsPanel.Gene_RVDocSum	SYPL1	SYPL1	240	http://www.ncbi.nlm.nih.gov/sites/entrez?Db=gene&Cmd=ShowDetailView&TermToSearch=730026&ordinalpos=1&itool=EntrezSystem2.PEntrez.Gene.Gene_ResultsPanel.Gene_RVDocSum	LOC730026	LOC730026	279	2.1	0.8	1.4	-0.1	0.0081	0.00063	0.75	-0.1	-0.1	-0.2	0	0.24	0.86	0.3
http://www.ensembl.org/Homo_sapiens/Variation/Summary?v=rs2705011	rs2705011	rs2705011	7	0.98	0.02	0	0	0.00012	0.2	-0.2	0.07	T	C	0.06	http://www.ncbi.nlm.nih.gov/sites/entrez?Db=gene&Cmd=ShowDetailView&TermToSearch=10135&ordinalpos=1&itool=EntrezSystem2.PEntrez.Gene.Gene_ResultsPanel.Gene_RVDocSum	PBEF1	PBEF1	73	http://www.ncbi.nlm.nih.gov/sites/entrez?Db=gene&Cmd=ShowDetailView&TermToSearch=6856&ordinalpos=1&itool=EntrezSystem2.PEntrez.Gene.Gene_ResultsPanel.Gene_RVDocSum	SYPL1	SYPL1	246	http://www.ncbi.nlm.nih.gov/sites/entrez?Db=gene&Cmd=ShowDetailView&TermToSearch=730026&ordinalpos=1&itool=EntrezSystem2.PEntrez.Gene.Gene_ResultsPanel.Gene_RVDocSum	LOC730026	LOC730026	273	2.2	0.8	1.4	-0.1	0.008	0.00057	0.9	-0.1	-0.1	-0.2	-0.1	0.24	0.85	0.43
http://www.ensembl.org/Homo_sapiens/Variation/Summary?v=rs2705001	rs2705001	rs2705001	7	0.98	0.02	0	0	0.00011	0.2	-0.21	0.07	G	A	0.06	http://www.ncbi.nlm.nih.gov/sites/entrez?Db=gene&Cmd=ShowDetailView&TermToSearch=10135&ordinalpos=1&itool=EntrezSystem2.PEntrez.Gene.Gene_ResultsPanel.Gene_RVDocSum	PBEF1	PBEF1	80	http://www.ncbi.nlm.nih.gov/sites/entrez?Db=gene&Cmd=ShowDetailView&TermToSearch=6856&ordinalpos=1&itool=EntrezSystem2.PEntrez.Gene.Gene_ResultsPanel.Gene_RVDocSum	SYPL1	SYPL1	253	http://www.ncbi.nlm.nih.gov/sites/entrez?Db=gene&Cmd=ShowDetailView&TermToSearch=730026&ordinalpos=1&itool=EntrezSystem2.PEntrez.Gene.Gene_ResultsPanel.Gene_RVDocSum	LOC730026	LOC730026	266	2.3	0.8	1.5	-0.1	0.0082	0.00052	0.94	-0.1	-0.1	-0.2	-0.1	0.23	0.85	0.49
http://www.ensembl.org/Homo_sapiens/Variation/Summary?v=rs719917	rs719917	rs719917	7	0.99	0.01	0	0	0.00027	0.18	-0.17	0.06	T	C	0.09	http://www.ncbi.nlm.nih.gov/sites/entrez?Db=gene&Cmd=ShowDetailView&TermToSearch=10135&ordinalpos=1&itool=EntrezSystem2.PEntrez.Gene.Gene_ResultsPanel.Gene_RVDocSum	PBEF1	PBEF1	82	http://www.ncbi.nlm.nih.gov/sites/entrez?Db=gene&Cmd=ShowDetailView&TermToSearch=6856&ordinalpos=1&itool=EntrezSystem2.PEntrez.Gene.Gene_ResultsPanel.Gene_RVDocSum	SYPL1	SYPL1	254	http://www.ncbi.nlm.nih.gov/sites/entrez?Db=gene&Cmd=ShowDetailView&TermToSearch=730026&ordinalpos=1&itool=EntrezSystem2.PEntrez.Gene.Gene_ResultsPanel.Gene_RVDocSum	LOC730026	LOC730026	265	2	0.1	1.2	0	0.083	0.0021	0.22	-0.1	-0.1	-0.1	-0.2	0.26	0.23	0.75
http://www.ensembl.org/Homo_sapiens/Variation/Summary?v=rs834772	rs834772	rs834772	7	0.99	0.01	0	0	0.00017	0.5	0.12	0.02	C	T	0.23	http://www.ncbi.nlm.nih.gov/sites/entrez?Db=gene&Cmd=ShowDetailView&TermToSearch=730221&ordinalpos=1&itool=EntrezSystem2.PEntrez.Gene.Gene_ResultsPanel.Gene_RVDocSum	LOC730221	LOC730221	98	http://www.ncbi.nlm.nih.gov/sites/entrez?Db=gene&Cmd=ShowDetailView&TermToSearch=136319&ordinalpos=1&itool=EntrezSystem2.PEntrez.Gene.Gene_ResultsPanel.Gene_RVDocSum	MTPN	MTPN	187	http://www.ncbi.nlm.nih.gov/sites/entrez?Db=gene&Cmd=ShowDetailView&TermToSearch=389558&ordinalpos=1&itool=EntrezSystem2.PEntrez.Gene.Gene_ResultsPanel.Gene_RVDocSum	UNQ1940	UNQ1940	416	2.2	0.3	0.6	0.4	0.035	0.016	0.028	-0.5	0.5	-0.1	-0.2	0.019	0.15	0.7
http://www.ensembl.org/Homo_sapiens/Variation/Summary?v=rs3801150	rs3801150	rs3801150	7	0.97	0.03	0	0	5.6e-05	0.59	0.14	0.02	T	C	0.34	http://www.ncbi.nlm.nih.gov/sites/entrez?Db=gene&Cmd=ShowDetailView&TermToSearch=6916&ordinalpos=1&itool=EntrezSystem2.PEntrez.Gene.Gene_ResultsPanel.Gene_RVDocSum	TBXAS1	TBXAS1	0	http://www.ncbi.nlm.nih.gov/sites/entrez?Db=gene&Cmd=ShowDetailView&TermToSearch=64761&ordinalpos=1&itool=EntrezSystem2.PEntrez.Gene.Gene_ResultsPanel.Gene_RVDocSum	PARP12	PARP12	38	http://www.ncbi.nlm.nih.gov/sites/entrez?Db=gene&Cmd=ShowDetailView&TermToSearch=80853&ordinalpos=1&itool=EntrezSystem2.PEntrez.Gene.Gene_ResultsPanel.Gene_RVDocSum	KIAA1718	KIAA1718	99	2.5	0	1.2	0.6	0.18	0.0022	0.021	-0.5	0.1	-0.4	-0.3	0.13	0.88	0.56
http://www.ensembl.org/Homo_sapiens/Variation/Summary?v=rs870020	rs870020	rs870020	7	0.98	0.02	0	0	0.0001	0.95	0.14	0	G	A	0.18	http://www.ncbi.nlm.nih.gov/sites/entrez?Db=gene&Cmd=ShowDetailView&TermToSearch=5799&ordinalpos=1&itool=EntrezSystem2.PEntrez.Gene.Gene_ResultsPanel.Gene_RVDocSum	PTPRN2	PTPRN2	0	http://www.ncbi.nlm.nih.gov/sites/entrez?Db=gene&Cmd=ShowDetailView&TermToSearch=642620&ordinalpos=1&itool=EntrezSystem2.PEntrez.Gene.Gene_ResultsPanel.Gene_RVDocSum	LOC642620	LOC642620	49	http://www.ncbi.nlm.nih.gov/sites/entrez?Db=gene&Cmd=ShowDetailView&TermToSearch=406945&ordinalpos=1&itool=EntrezSystem2.PEntrez.Gene.Gene_ResultsPanel.Gene_RVDocSum	MIRN153-2	MIRN153-2	238	2.3	-0.2	1.1	0.8	0.36	0.0032	0.0056	-0.6	-0.3	-0.4	-0.3	0.81	0.51	0.56
http://www.ensembl.org/Homo_sapiens/Variation/Summary?v=rs2283120	rs2283120	rs2283120	8	0.98	0.02	0	0	0.0001	0.72	0.1	-0.01	C	T	0.45	http://www.ncbi.nlm.nih.gov/sites/entrez?Db=gene&Cmd=ShowDetailView&TermToSearch=427&ordinalpos=1&itool=EntrezSystem2.PEntrez.Gene.Gene_ResultsPanel.Gene_RVDocSum	ASAH1	ASAH1	0	http://www.ncbi.nlm.nih.gov/sites/entrez?Db=gene&Cmd=ShowDetailView&TermToSearch=359764&ordinalpos=1&itool=EntrezSystem2.PEntrez.Gene.Gene_ResultsPanel.Gene_RVDocSum	MRPS18CP3	MRPS18CP3	6	http://www.ncbi.nlm.nih.gov/sites/entrez?Db=gene&Cmd=ShowDetailView&TermToSearch=5108&ordinalpos=1&itool=EntrezSystem2.PEntrez.Gene.Gene_ResultsPanel.Gene_RVDocSum	PCM1	PCM1	53	2.3	0.9	0.4	0.2	0.0056	0.031	0.074	-0.7	-0.6	-0.4	-0.1	0.79	0.78	0.21
http://www.ensembl.org/Homo_sapiens/Variation/Summary?v=rs16929959	rs16929959	rs16929959	8	0.99	0.01	0	0	0.0002	0.3	-0.11	-0.03	C	T	0.2	http://www.ncbi.nlm.nih.gov/sites/entrez?Db=gene&Cmd=ShowDetailView&TermToSearch=286183&ordinalpos=1&itool=EntrezSystem2.PEntrez.Gene.Gene_ResultsPanel.Gene_RVDocSum	FAM77D	FAM77D	0	http://www.ncbi.nlm.nih.gov/sites/entrez?Db=gene&Cmd=ShowDetailView&TermToSearch=643763&ordinalpos=1&itool=EntrezSystem2.PEntrez.Gene.Gene_ResultsPanel.Gene_RVDocSum	FLJ39198	FLJ39198	14	http://www.ncbi.nlm.nih.gov/sites/entrez?Db=gene&Cmd=ShowDetailView&TermToSearch=8836&ordinalpos=1&itool=EntrezSystem2.PEntrez.Gene.Gene_ResultsPanel.Gene_RVDocSum	GGH	GGH	52	2	0.1	1	0.1	0.056	0.0033	0.091	-0.4	-0.4	0.3	0	0.47	0.059	0.13
http://www.ensembl.org/Homo_sapiens/Variation/Summary?v=rs1481278	rs1481278	rs1481278	8	0.99	0.01	0	0	0.00018	0.31	0.17	0.05	C	T	0.07	http://www.ncbi.nlm.nih.gov/sites/entrez?Db=gene&Cmd=ShowDetailView&TermToSearch=23213&ordinalpos=1&itool=EntrezSystem2.PEntrez.Gene.Gene_ResultsPanel.Gene_RVDocSum	SULF1	SULF1	73	http://www.ncbi.nlm.nih.gov/sites/entrez?Db=gene&Cmd=ShowDetailView&TermToSearch=81796&ordinalpos=1&itool=EntrezSystem2.PEntrez.Gene.Gene_ResultsPanel.Gene_RVDocSum	SLCO5A1	SLCO5A1	279	http://www.ncbi.nlm.nih.gov/sites/entrez?Db=gene&Cmd=ShowDetailView&TermToSearch=116328&ordinalpos=1&itool=EntrezSystem2.PEntrez.Gene.Gene_ResultsPanel.Gene_RVDocSum	C8orf34	C8orf34	575	2.1	1.2	0.3	-0.1	0.0017	0.044	0.44	-0.3	-0.2	-0.2	-0.1	0.34	0.36	0.54
http://www.ensembl.org/Homo_sapiens/Variation/Summary?v=rs10977936	rs10977936	rs10977936	9	0.99	0.01	0	0	0.00023	0.087	-0.16	-0.07	G	T	0.17	http://www.ncbi.nlm.nih.gov/sites/entrez?Db=gene&Cmd=ShowDetailView&TermToSearch=6031&ordinalpos=1&itool=EntrezSystem2.PEntrez.Gene.Gene_ResultsPanel.Gene_RVDocSum	RN7SLP2	RN7SLP2	292	http://www.ncbi.nlm.nih.gov/sites/entrez?Db=gene&Cmd=ShowDetailView&TermToSearch=441386&ordinalpos=1&itool=EntrezSystem2.PEntrez.Gene.Gene_ResultsPanel.Gene_RVDocSum	RPS26P3	RPS26P3	643	http://www.ncbi.nlm.nih.gov/sites/entrez?Db=gene&Cmd=ShowDetailView&TermToSearch=5789&ordinalpos=1&itool=EntrezSystem2.PEntrez.Gene.Gene_ResultsPanel.Gene_RVDocSum	PTPRD	PTPRD	716	2	0.5	0.7	0	0.024	0.009	0.18	0.1	-0.2	0	-0.2	0.37	0.15	0.62
http://www.ensembl.org/Homo_sapiens/Variation/Summary?v=rs7847504	rs7847504	rs7847504	9	0.99	0.01	0	0	0.00016	0.63	0.1	-0.01	A	G	0.27	http://www.ncbi.nlm.nih.gov/sites/entrez?Db=gene&Cmd=ShowDetailView&TermToSearch=158038&ordinalpos=1&itool=EntrezSystem2.PEntrez.Gene.Gene_ResultsPanel.Gene_RVDocSum	LRRN6C	LRRN6C	0	http://www.ncbi.nlm.nih.gov/sites/entrez?Db=gene&Cmd=ShowDetailView&TermToSearch=646700&ordinalpos=1&itool=EntrezSystem2.PEntrez.Gene.Gene_ResultsPanel.Gene_RVDocSum	LOC646700	LOC646700	185	http://www.ncbi.nlm.nih.gov/sites/entrez?Db=gene&Cmd=ShowDetailView&TermToSearch=392298&ordinalpos=1&itool=EntrezSystem2.PEntrez.Gene.Gene_ResultsPanel.Gene_RVDocSum	LOC392298	LOC392298	455	2.1	0.4	-0.3	2.1	0.031	0.24	0.00011	-0.6	-0.5	-0.4	-0.2	0.75	0.65	0.34
http://www.ensembl.org/Homo_sapiens/Variation/Summary?v=rs10491577	rs10491577	rs10491577	9	0.95	0.05	0	0	3.2e-05	0.26	-0.17	-0.05	C	T	0.12	http://www.ncbi.nlm.nih.gov/sites/entrez?Db=gene&Cmd=ShowDetailView&TermToSearch=23245&ordinalpos=1&itool=EntrezSystem2.PEntrez.Gene.Gene_ResultsPanel.Gene_RVDocSum	ASTN2	ASTN2	0	http://www.ncbi.nlm.nih.gov/sites/entrez?Db=gene&Cmd=ShowDetailView&TermToSearch=22954&ordinalpos=1&itool=EntrezSystem2.PEntrez.Gene.Gene_ResultsPanel.Gene_RVDocSum	TRIM32	TRIM32	27	http://www.ncbi.nlm.nih.gov/sites/entrez?Db=gene&Cmd=ShowDetailView&TermToSearch=5069&ordinalpos=1&itool=EntrezSystem2.PEntrez.Gene.Gene_ResultsPanel.Gene_RVDocSum	PAPPA	PAPPA	326	2.8	0.4	0.9	0.6	0.031	0.0069	0.012	-0.3	-0.3	-0.3	0.5	0.92	0.85	0.018
http://www.ensembl.org/Homo_sapiens/Variation/Summary?v=rs4837838	rs4837838	rs4837838	9	0.94	0.05	0	0.01	3e-05	0.1	-0.18	-0.07	T	C	0.11	http://www.ncbi.nlm.nih.gov/sites/entrez?Db=gene&Cmd=ShowDetailView&TermToSearch=23245&ordinalpos=1&itool=EntrezSystem2.PEntrez.Gene.Gene_ResultsPanel.Gene_RVDocSum	ASTN2	ASTN2	0	http://www.ncbi.nlm.nih.gov/sites/entrez?Db=gene&Cmd=ShowDetailView&TermToSearch=22954&ordinalpos=1&itool=EntrezSystem2.PEntrez.Gene.Gene_ResultsPanel.Gene_RVDocSum	TRIM32	TRIM32	64	http://www.ncbi.nlm.nih.gov/sites/entrez?Db=gene&Cmd=ShowDetailView&TermToSearch=5069&ordinalpos=1&itool=EntrezSystem2.PEntrez.Gene.Gene_ResultsPanel.Gene_RVDocSum	PAPPA	PAPPA	362	2.8	0.3	0.9	0.7	0.043	0.0059	0.007	0	-0.3	-0.3	0.5	0.76	0.45	0.019
http://www.ensembl.org/Homo_sapiens/Variation/Summary?v=rs7874625	rs7874625	rs7874625	9	0.99	0.01	0	0	0.00018	0.67	-0.11	0.01	A	T	0.23	http://www.ncbi.nlm.nih.gov/sites/entrez?Db=gene&Cmd=ShowDetailView&TermToSearch=138881&ordinalpos=1&itool=EntrezSystem2.PEntrez.Gene.Gene_ResultsPanel.Gene_RVDocSum	OR1L8	OR1L8	7	http://www.ncbi.nlm.nih.gov/sites/entrez?Db=gene&Cmd=ShowDetailView&TermToSearch=138882&ordinalpos=1&itool=EntrezSystem2.PEntrez.Gene.Gene_ResultsPanel.Gene_RVDocSum	OR1N2	OR1N2	21	http://www.ncbi.nlm.nih.gov/sites/entrez?Db=gene&Cmd=ShowDetailView&TermToSearch=26742&ordinalpos=1&itool=EntrezSystem2.PEntrez.Gene.Gene_ResultsPanel.Gene_RVDocSum	OR1H1P	OR1H1P	32	2.1	0.4	0.9	0	0.03	0.0057	0.16	-0.5	-0.4	-0.3	-0.3	0.74	0.36	0.95
http://www.ensembl.org/Homo_sapiens/Variation/Summary?v=rs10985707	rs10985707	rs10985707	9	0.99	0.01	0	0	0.00019	0.65	-0.11	0.01	G	A	0.23	http://www.ncbi.nlm.nih.gov/sites/entrez?Db=gene&Cmd=ShowDetailView&TermToSearch=138881&ordinalpos=1&itool=EntrezSystem2.PEntrez.Gene.Gene_ResultsPanel.Gene_RVDocSum	OR1L8	OR1L8	8	http://www.ncbi.nlm.nih.gov/sites/entrez?Db=gene&Cmd=ShowDetailView&TermToSearch=138882&ordinalpos=1&itool=EntrezSystem2.PEntrez.Gene.Gene_ResultsPanel.Gene_RVDocSum	OR1N2	OR1N2	22	http://www.ncbi.nlm.nih.gov/sites/entrez?Db=gene&Cmd=ShowDetailView&TermToSearch=26742&ordinalpos=1&itool=EntrezSystem2.PEntrez.Gene.Gene_ResultsPanel.Gene_RVDocSum	OR1H1P	OR1H1P	32	2	0.3	0.9	0	0.033	0.0057	0.16	-0.5	-0.4	-0.3	-0.3	0.78	0.36	0.93
http://www.ensembl.org/Homo_sapiens/Variation/Summary?v=rs10761855	rs10761855	rs10761855	10	0.97	0.03	0	0	8e-05	0.49	0.13	0.02	C	T	0.19	http://www.ncbi.nlm.nih.gov/sites/entrez?Db=gene&Cmd=ShowDetailView&TermToSearch=305&ordinalpos=1&itool=EntrezSystem2.PEntrez.Gene.Gene_ResultsPanel.Gene_RVDocSum	ANXA2P3	ANXA2P3	168	http://www.ncbi.nlm.nih.gov/sites/entrez?Db=gene&Cmd=ShowDetailView&TermToSearch=645084&ordinalpos=1&itool=EntrezSystem2.PEntrez.Gene.Gene_ResultsPanel.Gene_RVDocSum	LOC645084	LOC645084	488	http://www.ncbi.nlm.nih.gov/sites/entrez?Db=gene&Cmd=ShowDetailView&TermToSearch=87688&ordinalpos=1&itool=EntrezSystem2.PEntrez.Gene.Gene_ResultsPanel.Gene_RVDocSum	RPL7AP1	RPL7AP1	755	2.5	1.3	-0.1	0.7	0.0014	0.25	0.009	-0.5	-0.4	-0.2	-0.3	0.94	0.31	0.76
http://www.ensembl.org/Homo_sapiens/Variation/Summary?v=rs7895566	rs7895566	rs7895566	10	0.88	0.12	0	0	1.1e-05	0.34	0.16	0.03	G	T	0.14	http://www.ncbi.nlm.nih.gov/sites/entrez?Db=gene&Cmd=ShowDetailView&TermToSearch=305&ordinalpos=1&itool=EntrezSystem2.PEntrez.Gene.Gene_ResultsPanel.Gene_RVDocSum	ANXA2P3	ANXA2P3	163	http://www.ncbi.nlm.nih.gov/sites/entrez?Db=gene&Cmd=ShowDetailView&TermToSearch=645084&ordinalpos=1&itool=EntrezSystem2.PEntrez.Gene.Gene_ResultsPanel.Gene_RVDocSum	LOC645084	LOC645084	493	http://www.ncbi.nlm.nih.gov/sites/entrez?Db=gene&Cmd=ShowDetailView&TermToSearch=87688&ordinalpos=1&itool=EntrezSystem2.PEntrez.Gene.Gene_ResultsPanel.Gene_RVDocSum	RPL7AP1	RPL7AP1	760	3.2	1.2	0.3	0.8	0.0023	0.056	0.0052	-0.4	-0.4	-0.2	-0.3	0.9	0.27	0.67
http://www.ensembl.org/Homo_sapiens/Variation/Summary?v=rs4746459	rs4746459	rs4746459	10	0.96	0.04	0	0	4.5e-05	0.54	0.12	0.02	T	G	0.2	http://www.ncbi.nlm.nih.gov/sites/entrez?Db=gene&Cmd=ShowDetailView&TermToSearch=305&ordinalpos=1&itool=EntrezSystem2.PEntrez.Gene.Gene_ResultsPanel.Gene_RVDocSum	ANXA2P3	ANXA2P3	160	http://www.ncbi.nlm.nih.gov/sites/entrez?Db=gene&Cmd=ShowDetailView&TermToSearch=645084&ordinalpos=1&itool=EntrezSystem2.PEntrez.Gene.Gene_ResultsPanel.Gene_RVDocSum	LOC645084	LOC645084	495	http://www.ncbi.nlm.nih.gov/sites/entrez?Db=gene&Cmd=ShowDetailView&TermToSearch=87688&ordinalpos=1&itool=EntrezSystem2.PEntrez.Gene.Gene_ResultsPanel.Gene_RVDocSum	RPL7AP1	RPL7AP1	762	2.7	1.4	0	0.7	0.0013	0.18	0.0099	-0.6	-0.5	-0.3	-0.3	0.95	0.38	0.73
http://www.ensembl.org/Homo_sapiens/Variation/Summary?v=rs7093406	rs7093406	rs7093406	10	0.89	0.11	0	0	1.2e-05	0.35	0.15	0.03	C	T	0.14	http://www.ncbi.nlm.nih.gov/sites/entrez?Db=gene&Cmd=ShowDetailView&TermToSearch=305&ordinalpos=1&itool=EntrezSystem2.PEntrez.Gene.Gene_ResultsPanel.Gene_RVDocSum	ANXA2P3	ANXA2P3	158	http://www.ncbi.nlm.nih.gov/sites/entrez?Db=gene&Cmd=ShowDetailView&TermToSearch=645084&ordinalpos=1&itool=EntrezSystem2.PEntrez.Gene.Gene_ResultsPanel.Gene_RVDocSum	LOC645084	LOC645084	498	http://www.ncbi.nlm.nih.gov/sites/entrez?Db=gene&Cmd=ShowDetailView&TermToSearch=87688&ordinalpos=1&itool=EntrezSystem2.PEntrez.Gene.Gene_ResultsPanel.Gene_RVDocSum	RPL7AP1	RPL7AP1	764	3.1	1.1	0.3	0.8	0.0024	0.059	0.0051	-0.4	-0.4	-0.2	-0.3	0.91	0.27	0.66
http://www.ensembl.org/Homo_sapiens/Variation/Summary?v=rs1915648	rs1915648	rs1915648	10	0.97	0.03	0	0	5.4e-05	0.5	0.12	0.02	A	G	0.19	http://www.ncbi.nlm.nih.gov/sites/entrez?Db=gene&Cmd=ShowDetailView&TermToSearch=305&ordinalpos=1&itool=EntrezSystem2.PEntrez.Gene.Gene_ResultsPanel.Gene_RVDocSum	ANXA2P3	ANXA2P3	153	http://www.ncbi.nlm.nih.gov/sites/entrez?Db=gene&Cmd=ShowDetailView&TermToSearch=645084&ordinalpos=1&itool=EntrezSystem2.PEntrez.Gene.Gene_ResultsPanel.Gene_RVDocSum	LOC645084	LOC645084	503	http://www.ncbi.nlm.nih.gov/sites/entrez?Db=gene&Cmd=ShowDetailView&TermToSearch=87688&ordinalpos=1&itool=EntrezSystem2.PEntrez.Gene.Gene_ResultsPanel.Gene_RVDocSum	RPL7AP1	RPL7AP1	769	2.6	1.4	-0.1	0.7	0.0013	0.21	0.0095	-0.6	-0.5	-0.3	-0.3	1	0.37	0.73
http://www.ensembl.org/Homo_sapiens/Variation/Summary?v=rs12412838	rs12412838	rs12412838	10	0.89	0.11	0	0	1.3e-05	0.37	0.15	0.03	C	T	0.14	http://www.ncbi.nlm.nih.gov/sites/entrez?Db=gene&Cmd=ShowDetailView&TermToSearch=305&ordinalpos=1&itool=EntrezSystem2.PEntrez.Gene.Gene_ResultsPanel.Gene_RVDocSum	ANXA2P3	ANXA2P3	150	http://www.ncbi.nlm.nih.gov/sites/entrez?Db=gene&Cmd=ShowDetailView&TermToSearch=645084&ordinalpos=1&itool=EntrezSystem2.PEntrez.Gene.Gene_ResultsPanel.Gene_RVDocSum	LOC645084	LOC645084	506	http://www.ncbi.nlm.nih.gov/sites/entrez?Db=gene&Cmd=ShowDetailView&TermToSearch=87688&ordinalpos=1&itool=EntrezSystem2.PEntrez.Gene.Gene_ResultsPanel.Gene_RVDocSum	RPL7AP1	RPL7AP1	772	3.1	1.2	0.2	0.8	0.0024	0.06	0.0051	-0.4	-0.4	-0.2	-0.3	0.9	0.29	0.67
http://www.ensembl.org/Homo_sapiens/Variation/Summary?v=rs2139905	rs2139905	rs2139905	10	0.97	0.03	0	0	5.8e-05	0.54	0.12	0.02	A	C	0.19	http://www.ncbi.nlm.nih.gov/sites/entrez?Db=gene&Cmd=ShowDetailView&TermToSearch=305&ordinalpos=1&itool=EntrezSystem2.PEntrez.Gene.Gene_ResultsPanel.Gene_RVDocSum	ANXA2P3	ANXA2P3	146	http://www.ncbi.nlm.nih.gov/sites/entrez?Db=gene&Cmd=ShowDetailView&TermToSearch=645084&ordinalpos=1&itool=EntrezSystem2.PEntrez.Gene.Gene_ResultsPanel.Gene_RVDocSum	LOC645084	LOC645084	510	http://www.ncbi.nlm.nih.gov/sites/entrez?Db=gene&Cmd=ShowDetailView&TermToSearch=87688&ordinalpos=1&itool=EntrezSystem2.PEntrez.Gene.Gene_ResultsPanel.Gene_RVDocSum	RPL7AP1	RPL7AP1	776	2.6	1.3	-0.1	0.7	0.0015	0.22	0.0084	-0.6	-0.5	-0.3	-0.3	0.99	0.36	0.79
http://www.ensembl.org/Homo_sapiens/Variation/Summary?v=rs10995964	rs10995964	rs10995964	10	0.89	0.1	0	0	1.3e-05	0.42	0.15	0.03	A	G	0.14	http://www.ncbi.nlm.nih.gov/sites/entrez?Db=gene&Cmd=ShowDetailView&TermToSearch=305&ordinalpos=1&itool=EntrezSystem2.PEntrez.Gene.Gene_ResultsPanel.Gene_RVDocSum	ANXA2P3	ANXA2P3	145	http://www.ncbi.nlm.nih.gov/sites/entrez?Db=gene&Cmd=ShowDetailView&TermToSearch=645084&ordinalpos=1&itool=EntrezSystem2.PEntrez.Gene.Gene_ResultsPanel.Gene_RVDocSum	LOC645084	LOC645084	511	http://www.ncbi.nlm.nih.gov/sites/entrez?Db=gene&Cmd=ShowDetailView&TermToSearch=87688&ordinalpos=1&itool=EntrezSystem2.PEntrez.Gene.Gene_ResultsPanel.Gene_RVDocSum	RPL7AP1	RPL7AP1	777	3.1	1.1	0.3	0.8	0.0028	0.057	0.0052	-0.4	-0.4	-0.2	-0.3	0.94	0.3	0.74
http://www.ensembl.org/Homo_sapiens/Variation/Summary?v=rs10761859	rs10761859	rs10761859	10	0.94	0.06	0	0	3e-05	0.5	0.12	0.02	G	A	0.2	http://www.ncbi.nlm.nih.gov/sites/entrez?Db=gene&Cmd=ShowDetailView&TermToSearch=305&ordinalpos=1&itool=EntrezSystem2.PEntrez.Gene.Gene_ResultsPanel.Gene_RVDocSum	ANXA2P3	ANXA2P3	144	http://www.ncbi.nlm.nih.gov/sites/entrez?Db=gene&Cmd=ShowDetailView&TermToSearch=645084&ordinalpos=1&itool=EntrezSystem2.PEntrez.Gene.Gene_ResultsPanel.Gene_RVDocSum	LOC645084	LOC645084	512	http://www.ncbi.nlm.nih.gov/sites/entrez?Db=gene&Cmd=ShowDetailView&TermToSearch=87688&ordinalpos=1&itool=EntrezSystem2.PEntrez.Gene.Gene_ResultsPanel.Gene_RVDocSum	RPL7AP1	RPL7AP1	779	2.8	1.6	-0.1	0.7	0.0007	0.2	0.0098	-0.6	-0.5	-0.3	-0.3	0.99	0.37	0.72
http://www.ensembl.org/Homo_sapiens/Variation/Summary?v=rs7900909	rs7900909	rs7900909	10	0.84	0.15	0	0.01	7.9e-06	0.39	0.15	0.03	C	T	0.15	http://www.ncbi.nlm.nih.gov/sites/entrez?Db=gene&Cmd=ShowDetailView&TermToSearch=305&ordinalpos=1&itool=EntrezSystem2.PEntrez.Gene.Gene_ResultsPanel.Gene_RVDocSum	ANXA2P3	ANXA2P3	137	http://www.ncbi.nlm.nih.gov/sites/entrez?Db=gene&Cmd=ShowDetailView&TermToSearch=645084&ordinalpos=1&itool=EntrezSystem2.PEntrez.Gene.Gene_ResultsPanel.Gene_RVDocSum	LOC645084	LOC645084	519	http://www.ncbi.nlm.nih.gov/sites/entrez?Db=gene&Cmd=ShowDetailView&TermToSearch=87688&ordinalpos=1&itool=EntrezSystem2.PEntrez.Gene.Gene_ResultsPanel.Gene_RVDocSum	RPL7AP1	RPL7AP1	785	3.3	1.5	0.2	0.7	0.00095	0.063	0.0081	-0.4	-0.4	-0.2	-0.3	0.93	0.29	0.72
http://www.ensembl.org/Homo_sapiens/Variation/Summary?v=rs11816713	rs11816713	rs11816713	10	0.9	0.09	0	0	1.5e-05	0.41	0.17	0.03	T	C	0.12	http://www.ncbi.nlm.nih.gov/sites/entrez?Db=gene&Cmd=ShowDetailView&TermToSearch=305&ordinalpos=1&itool=EntrezSystem2.PEntrez.Gene.Gene_ResultsPanel.Gene_RVDocSum	ANXA2P3	ANXA2P3	133	http://www.ncbi.nlm.nih.gov/sites/entrez?Db=gene&Cmd=ShowDetailView&TermToSearch=645084&ordinalpos=1&itool=EntrezSystem2.PEntrez.Gene.Gene_ResultsPanel.Gene_RVDocSum	LOC645084	LOC645084	523	http://www.ncbi.nlm.nih.gov/sites/entrez?Db=gene&Cmd=ShowDetailView&TermToSearch=87688&ordinalpos=1&itool=EntrezSystem2.PEntrez.Gene.Gene_ResultsPanel.Gene_RVDocSum	RPL7AP1	RPL7AP1	790	3.1	1.2	0.2	0.8	0.0023	0.062	0.0065	-0.4	-0.4	-0.2	-0.2	0.94	0.28	0.8
http://www.ensembl.org/Homo_sapiens/Variation/Summary?v=rs10995982	rs10995982	rs10995982	10	0.9	0.1	0	0	1.4e-05	0.43	0.16	0.03	T	C	0.13	http://www.ncbi.nlm.nih.gov/sites/entrez?Db=gene&Cmd=ShowDetailView&TermToSearch=305&ordinalpos=1&itool=EntrezSystem2.PEntrez.Gene.Gene_ResultsPanel.Gene_RVDocSum	ANXA2P3	ANXA2P3	132	http://www.ncbi.nlm.nih.gov/sites/entrez?Db=gene&Cmd=ShowDetailView&TermToSearch=645084&ordinalpos=1&itool=EntrezSystem2.PEntrez.Gene.Gene_ResultsPanel.Gene_RVDocSum	LOC645084	LOC645084	524	http://www.ncbi.nlm.nih.gov/sites/entrez?Db=gene&Cmd=ShowDetailView&TermToSearch=87688&ordinalpos=1&itool=EntrezSystem2.PEntrez.Gene.Gene_ResultsPanel.Gene_RVDocSum	RPL7AP1	RPL7AP1	790	3.1	1.2	0.2	0.8	0.0024	0.062	0.0059	-0.4	-0.4	-0.2	-0.2	0.94	0.28	0.83
http://www.ensembl.org/Homo_sapiens/Variation/Summary?v=rs1915601	rs1915601	rs1915601	10	0.9	0.1	0	0	1.3e-05	0.43	0.16	0.03	A	G	0.13	http://www.ncbi.nlm.nih.gov/sites/entrez?Db=gene&Cmd=ShowDetailView&TermToSearch=305&ordinalpos=1&itool=EntrezSystem2.PEntrez.Gene.Gene_ResultsPanel.Gene_RVDocSum	ANXA2P3	ANXA2P3	131	http://www.ncbi.nlm.nih.gov/sites/entrez?Db=gene&Cmd=ShowDetailView&TermToSearch=645084&ordinalpos=1&itool=EntrezSystem2.PEntrez.Gene.Gene_ResultsPanel.Gene_RVDocSum	LOC645084	LOC645084	525	http://www.ncbi.nlm.nih.gov/sites/entrez?Db=gene&Cmd=ShowDetailView&TermToSearch=87688&ordinalpos=1&itool=EntrezSystem2.PEntrez.Gene.Gene_ResultsPanel.Gene_RVDocSum	RPL7AP1	RPL7AP1	791	3.1	1.2	0.2	0.8	0.0023	0.061	0.0059	-0.4	-0.4	-0.2	-0.2	0.94	0.28	0.84
http://www.ensembl.org/Homo_sapiens/Variation/Summary?v=rs7907064	rs7907064	rs7907064	10	0.93	0.07	0	0	2.2e-05	0.29	0.14	0.03	C	T	0.21	http://www.ncbi.nlm.nih.gov/sites/entrez?Db=gene&Cmd=ShowDetailView&TermToSearch=305&ordinalpos=1&itool=EntrezSystem2.PEntrez.Gene.Gene_ResultsPanel.Gene_RVDocSum	ANXA2P3	ANXA2P3	123	http://www.ncbi.nlm.nih.gov/sites/entrez?Db=gene&Cmd=ShowDetailView&TermToSearch=645084&ordinalpos=1&itool=EntrezSystem2.PEntrez.Gene.Gene_ResultsPanel.Gene_RVDocSum	LOC645084	LOC645084	533	http://www.ncbi.nlm.nih.gov/sites/entrez?Db=gene&Cmd=ShowDetailView&TermToSearch=87688&ordinalpos=1&itool=EntrezSystem2.PEntrez.Gene.Gene_ResultsPanel.Gene_RVDocSum	RPL7AP1	RPL7AP1	799	2.9	1	0.3	1	0.0039	0.08	0.0028	-0.4	-0.3	-0.2	-0.3	0.59	0.28	0.88
http://www.ensembl.org/Homo_sapiens/Variation/Summary?v=rs12779528	rs12779528	rs12779528	10	0.88	0.11	0	0.01	1.1e-05	0.18	0.16	0.05	A	G	0.16	http://www.ncbi.nlm.nih.gov/sites/entrez?Db=gene&Cmd=ShowDetailView&TermToSearch=305&ordinalpos=1&itool=EntrezSystem2.PEntrez.Gene.Gene_ResultsPanel.Gene_RVDocSum	ANXA2P3	ANXA2P3	123	http://www.ncbi.nlm.nih.gov/sites/entrez?Db=gene&Cmd=ShowDetailView&TermToSearch=645084&ordinalpos=1&itool=EntrezSystem2.PEntrez.Gene.Gene_ResultsPanel.Gene_RVDocSum	LOC645084	LOC645084	533	http://www.ncbi.nlm.nih.gov/sites/entrez?Db=gene&Cmd=ShowDetailView&TermToSearch=87688&ordinalpos=1&itool=EntrezSystem2.PEntrez.Gene.Gene_ResultsPanel.Gene_RVDocSum	RPL7AP1	RPL7AP1	799	3.2	0.7	0.6	1.1	0.0099	0.022	0.002	-0.2	-0.3	0	-0.2	0.51	0.15	0.83
http://www.ensembl.org/Homo_sapiens/Variation/Summary?v=rs12779886	rs12779886	rs12779886	10	0.87	0.12	0	0.01	1e-05	0.17	0.17	0.05	G	A	0.15	http://www.ncbi.nlm.nih.gov/sites/entrez?Db=gene&Cmd=ShowDetailView&TermToSearch=305&ordinalpos=1&itool=EntrezSystem2.PEntrez.Gene.Gene_ResultsPanel.Gene_RVDocSum	ANXA2P3	ANXA2P3	123	http://www.ncbi.nlm.nih.gov/sites/entrez?Db=gene&Cmd=ShowDetailView&TermToSearch=645084&ordinalpos=1&itool=EntrezSystem2.PEntrez.Gene.Gene_ResultsPanel.Gene_RVDocSum	LOC645084	LOC645084	533	http://www.ncbi.nlm.nih.gov/sites/entrez?Db=gene&Cmd=ShowDetailView&TermToSearch=87688&ordinalpos=1&itool=EntrezSystem2.PEntrez.Gene.Gene_ResultsPanel.Gene_RVDocSum	RPL7AP1	RPL7AP1	800	3.2	0.7	0.7	1	0.011	0.016	0.0025	-0.2	-0.3	0	-0.2	0.49	0.15	0.85
[truncated: 249 more rows]
